# Supplementary material for: Secular oxidation of Archean upper mantle caused by increasing crustal recycling
Source: Research Square preprint supplement (doi:10.21203/rs.3.rs-948127/v1), 2021-10-01
Supplement: Supplementary file 1 [file 4b6ca0ed62bea67b456a3959.xlsx]

## Sheet: S1
Supplementary Table 1. Geochemcial database of the ~3.8-2.5 Ga mantle-derived voclanic rocks from fourteen Archean cratons.
Category	Sample No.	SiO2 (wt. %)	Al2O3	TFe2O3	CaO	MgO	K2O	Na2O	MnO	TiO2	P2O5	LOI	Total	Mg#	P (ppm)	Sc	Ti	V	Cr	Co	Ni	Rb	Sr	Ba	Zr	Hf	Nb	Ta	La	Ce	Pr	Nd	Sm	Eu	Gd	Tb	Dy	Ho	Er	Tm	Yb	Lu	Y	Th	(Nb/La)PM	Locations	Reference
ADK	86101	48.1394	5.87066	13.7013	7.16221	24.0697	0.0489222	0.254395	0.283749	0.430515	0.0391378	2.96	100	80.3695	170.883		2583.09	130	3010	100	1445	1	23		24				0.958	3.11		2.94	1.02	0.22	1.33		1.52		0.901		0.828	0.124	9			Aldan Craton	[7150] Puchtel et al., 1993
ADK	8697	46.6939	7.26021	14.6704	8.03844	21.5738	0.0689572	0.679721	0.315233	0.551658	0.147765	2.74	100	77.4122	645.173		3309.95	160	2150	100	1130	2	17		32				1.41	4.36		3.92	1.34	0.374	1.74		1.95		1.18		1.09	0.165	11			Aldan Craton	[7150] Puchtel et al., 1993
ADK	8692	48.4713	6.41358	14.7811	8.96522	20.2949	0.0394076	0.0985189	0.226594	0.561558	0.147778	1.74	100	76.1896	645.23		3369.35	120	2240	140	1120		15		31				1.82	5.89		5.18	1.63	0.504	2.21		2.47		1.48		1.35		18			Aldan Craton	[7150] Puchtel et al., 1993
ADK	8694	48.482	6.70076	14.5653	8.91792	20.2994	0.0295622	0.0689784	0.216789	0.561681	0.157665	1.79	100	76.4593	688.396		3370.09	200	1880	115	1060	2	24		30				1.85	5.55		4.68	1.46	0.407	1.94		2.14		1.26		1.18	0.176	12			Aldan Craton	[7150] Puchtel et al., 1993
AUK	8569	47.6621	8.28168	10.2818	5.46803	27.3296	0.0212351	0.244203	0.244203	0.424702	0.0424702	5.98	100	86.1007	185.433		2548.21	90	2950	100	470		60	90					0.347	1.23		1.233	0.4677	0.124	0.678		0.907		0.611		0.621	0.0966	9			Aldan Craton	[6004] Zhuravlev et al., 1989
AUK	228/12	49.4591	7.05287	10.9934	9.13015	22.3555	0.0296755	0.346214	0.187945	0.276971	0.168161	4.51	100	82.5759	734.224		1661.83	126	2957	83	938	1	7		14		0.9		0.555	1.7		1.65	0.65	0.148	1		1.29		0.83		0.801		7		1.56249	Aldan Craton	[7150] Puchtel et al., 1993
AUK	8551	49.64	7.20868	11.4292	9.26547	21.4579	0.0395538	0.375761	0.177992	0.31643	0.088996	4.68	100	81.3969	388.574		1898.58	134	2528	85	1095	1	12						0.456	1.41		1.24	0.48	0.361	0.716		0.931		0.626		0.634	0.099	6			Aldan Craton	[7150] Puchtel et al., 1993
AUK	2429595	48.4985	7.95493	14.1321	7.26491	20.8977	0.0788593	0.522443	0.177433	0.335152	0.138004	6.54	100	77.5089	602.552		2010.91	234	2509	95	971	1	9				1		0.42	1.29		1.16	0.439	0.131	0.655		0.865		0.586		0.587		9		2.29413	Aldan Craton	[7150] Puchtel et al., 1993
AUK	86228/18	49.7842	6.20065	11.3275	6.53753	25.3185	0.0210548	0.231603	0.168439	0.305295	0.105274	5.37	100	83.8943	459.648		1831.77					1	70	80					0.362	1.12		0.998	0.369	0.0902	0.577		0.795		0.541		0.537	0.0841	8			Aldan Craton	[6004] Zhuravlev et al., 1989
AUK	85116	49.9197	6.14853	10.6783	9.16348	23.3288	0.0197702	0.148276	0.168047	0.276783	0.148276	5.13	100	83.5835	647.404		1660.7	129	3147	83	1116	1	22		14		1		0.831	2.4		2.15	0.79	0.329	1.15		1.43		0.929		0.909		8		1.15949	Aldan Craton	[7150] Puchtel et al., 1993
AUK	228/3	49.1618	7.83424	11.1032	8.55633	22.4542	0.0296751	0.267076	0.178051	0.28686	0.128592	5.53	100	82.4961	561.459		1721.16	127	2629	61	1165	2	11		17		1		0.643	1.8		1.53	0.563	0.126	0.808		1.07		0.736		0.742		8		1.4985	Aldan Craton	[7150] Puchtel et al., 1993
AUK	86195	48.4471	8.11735	10.8673	11.2714	20.2687	0.00988715	0.336163	0.227405	0.415261	0.0395486	2.18	100	81.2966	172.677		2491.56	145	2180	75	1040		5						0.841	2.37		2.29	0.866	0.219	1.27		1.53		0.935		0.884		9			Aldan Craton	[7150] Puchtel et al., 1993
AUK	86171	47.9184	8.1807	11.9685	10.1765	20.9458	0.118561	0.0494004	0.177841	0.395203	0.0691605	3.01	100	80.3093	301.968		2371.22	150	2380	80	1130	1	18						0.771	1.93		1.73	0.734	0.212	1.06		1.37		0.894		0.883		10			Aldan Craton	[7150] Puchtel et al., 1993
B-1	106/2	49.4951	15.1985	13.7986	11.0989	7.08929	0.159984	1.60984	0.19998	1.11989	0.229977		100	54.4904	1004.12		6719.33		255		129				60		2.32	0.149	2.78	8.12		6.92	2.35	0.789	3.23		3.79		2.39		2.28		25	0.232	0.804101	Aldan Craton	[9427] Puchtel, 2004
B-1	2489160	49.3434	14.3096	12.6128	11.8424	8.91142	0.187505	1.70728	0.207242	0.700677	0.177636	1.42	100	62.2155	775.595		4204.06	201	463	54	155	2	127		37		1.8		2.01	5.42		4.39	1.49	0.524	2.09		2.61		2.64		1.6		16		0.862867	Aldan Craton	[7150] Puchtel et al., 1993
B-1	105/1	48.9706	14.7911	14.6912	10.8935	7.04577	0.19988	1.69898	0.179892	1.26924	0.259844		100	52.7787	1134.53		7615.43		249		108				65		2.94	0.187	3.44	10.1		8.47	2.83	0.985	3.86		4.46		2.78		2.68		28	0.312	0.823486	Aldan Craton	[9427] Puchtel, 2004
B-1	104/1	49.1626	14.5813	14.4531	11.0345	7.37932	0.325123	1.5468	0.187192	1.10345	0.226601	1.81	100	54.3354	989.385		6620.69	294	263	57	120	3	76		64		3		3.78	10.2		8.03	2.68	0.965	3.53		4.27		1.71		2.49		24		0.76471	Aldan Craton	[7150] Puchtel et al., 1993
B-1	109/1	48.8	15.3	13.4	11.4	7.49	0.26	1.75	0.19	1.17	0.24		100	56.5717	1047.89		7020		349		137				62		3.07	0.19	3.63	9.9		7.7	2.56	0.913	3.34		4.04		2.53		2.39		27	0.332	0.81489	Aldan Craton	[9427] Puchtel, 2004
B-1	2486419	49.3465	8.19152	13.9298	12.7314	13.9157	0.118432	0.542812	0.207255	0.809283	0.207255	2.1	100	69.9533	904.918		4855.7	188	1734	76	518	3	106		48		3		3.82	10.1		7.41	2.11	0.812	2.46		2.49		1.38		1.19		14		0.756702	Aldan Craton	[7150] Puchtel et al., 1993
B-1	8707/16	49.0425	7.71966	14.5792	12.9166	13.9257	0.111002	0.585281	0.201821	0.746738	0.171548	1.88	100	69.0021	749.012		4480.43		1207	67	356	1	32		46		2.9		3.14	8.31		6.15	1.77	0.706	2.04		2.04		1.15		1.01		14		0.889888	Aldan Craton	[7150] Puchtel et al., 1993
B-1	2486450	50.6508	7.69892	13.3973	12.6627	13.9796	0.141822	0.283644	0.192473	0.759762	0.232994	2.06	100	70.8607	1017.3		4558.57	172	1320	70	397	1	84		43		2.2		2.64	7.12		5.68	1.8	0.667	2.21		2.31		1.28		1.14		13		0.802945	Aldan Craton	[7150] Puchtel et al., 1993
B-1	2486358	49.5016	7.92815	13.5891	12.4247	14.2983	0.138052	0.926923	0.187357	0.779009	0.2268	2.17	100	71.0323	990.254		4674.06	188	1249	70	370	2	74		45		2.6		2.73	7.65		6.38	2.01	0.733	2.47		2.6		1.46		1.3		14		0.917652	Aldan Craton	[7150] Puchtel et al., 1993
B-1	2486266	49.4653	7.7154	14.0172	12.12	15.0761	0.118244	0.335024	0.197073	0.75873	0.197073	1.84	100	71.4819	860.458		4552.38	204	1258	71	363	1	31		43		2.3		1.41	4.65		4.63	1.77	0.528	2.33		2.59		1.49		1.3		14		1.57172	Aldan Craton	[7150] Puchtel et al., 1993
B-2	507/4	48.8902	15.197	14.1972	11.2977	7.19856	0.129974	1.77964	0.189962	0.929814	0.189962		100	54.1634	829.412		5578.88		278		112				55		2.56	0.17	3.54	9.39		7.2	2.28	0.808	3.02		3.6		2.27		2.1		22	0.29	0.696793	Aldan Craton	[9427] Puchtel, 2004
B-2	2486238	48.2268	7.83439	14.7666	12.0075	14.8617	0.118106	0.964535	0.206686	0.777534	0.236213	2.37	100	70.1092	1031.35		4665.2	188	1692	80	518	1	27		47		2.4		3.29	8.89		6.98	2.19	0.805	2.68		2.81		1.61		1.42		15		0.702882	Aldan Craton	[7150] Puchtel et al., 1993
HMA	Z-1-G	54.9695	16.4088	7.68002	7.51728	6.76863	1.93829	4.08169	0.153832	0.430731	0.0512775	2.4	100	67.2554	223.888		2584.39		120	28	120	34	440	860	77		3.3		23	54		21.25	4.19	0.95		0.86					2.1	0.33			0.138246	Aldan Craton	[15424] LAVRIK S. N. (2002)
HMA	Z-1-ZH	54.9591	16.3935	7.69448	7.52051	6.77256	1.93648	4.08812	0.153689	0.430329	0.0512296	2.4	100	67.2267	223.679		2581.97	140	120	28	120	34	440	860	77		3.3		23	54		28	4.7	0.95		0.86					2.1	0.33			0.138246	Aldan Craton	[14511] LAVRIK S. N. (2010)
ADK	NPA2	48.8145	1.93472	13.5626	8.68144	26.3916		0.198433		0.416709			100	81.933	0	23	2500.26	107	1950		1588		69		18				1.16	3.33		3.27	1.08	0.4	1.31		1.28		0.61		0.46					Amazonia Craton	[5474] Arndt, 1989
ADK	NPA13	45.8854	3.41403	14.3804	6.37021	29.1636		0.28865		0.437952	0.0597207		100	82.5367	260.752	22	2627.71	107	1920		1802	0.22	91.2		9				1.42	4.21		3.86	1.29	0.56	1.55		1.53		0.76		0.63	0.09	8			Amazonia Craton	[5474] Arndt, 1989
ADK	NPA15	46.605	1.59283	15.9537	16.2233	18.3864		0.334297		0.90457			100	72.8693	0	36	5427.42	223	2449		589		206		46				3.58	9.69		7.67	2.43	1.07	2.95		3.04		1.6		1.43	0.2	16			Amazonia Craton	[5474] Arndt, 1989
ADK	GO-2	50.8177	2.62049	12.5943	3.51047	29.8736	0.0395546	0.0988864		0.306548	0.138441	6.87	100	84.6812	604.46		1839.29	64	3400		2520		44			0.6	0.6		1.5	3.1		2.2	0.6	0.2	0.7		0.8		0.4		0.4	0.05	3	0.2	0.385414	Amazonia Craton	[9205] Kuyumjian and Jost, 2006
AUK	SERINGA09	45.0261	7.88997	14.106	9.24406	22.2945	0.0852969	0.629065	0.234567	0.447809	0.0426485	5.15	100	78.6478	186.212		2686.85	169	1440	107	790	0.5	27.9	10	22.4	0.8	0.9	0.09	0.9	2.5	0.4	2.4	0.9	0.3	1.1	0.2	1.6	0.3	1	0.1	1	0.1	8.6	0.2	0.963534	Amazonia Craton	[20057] Siepierski et al., 2016
AUK	148C	47.767	7.69096	14.3615	3.628	25.9298		0.00988555	0.187825	0.286681	0.138398	6.37	100	80.7978	604.272	32	1720.09	153	3616	106	1286				18				2.64	6.19		2.78	2.13	0.16	1.68		1.5		1		0.87	0.12	20	0.01		Amazonia Craton	[5118] De Souza et al., 1995
AUK	SERINGA06	45.0703	7.19761	13.9693	8.15588	24.2973	0.0532368	0.56431	0.244889	0.4046	0.0425894	5.75	100	80.2118	185.954		2427.6	149	1530	99.8	873	0.1	30		15.8	0.6	0.8	0.09	1	3.2	0.4	2.3	0.8	0.2	1	0.2	1.5	0.2	0.9	0.1	0.8	0.1	8		0.770827	Amazonia Craton	[20057] Siepierski et al., 2016
AUK	SERINGA10	47.7913	6.18427	12.8629	10.2019	21.8763	0.0736222	0.504838	0.210349	0.273454	0.0210349	4.18	100	79.8532	91.8426		1640.72	116	1030	100.5	1040	0.7	25.5	20	13.5	0.5	0.8	0.05	0.9	2.4	0.3	2	0.6	0.3	0.9	0.1	1.1	0.2	0.7		0.6		6.4		0.856475	Amazonia Craton	[20057] Siepierski et al., 2016
AUK	SERINGA04	45.3689	6.98541	13.2154	8.26865	25.1682	0.0931388	0.320811	0.186278	0.362206	0.0310463	2.98	100	81.6121	135.554		2173.24	146	1480	107	1100	2.6	21.4	10	14.5	0.6	0.8	0.09	1.4	3.6	0.5	2.8	0.9	0.2	1.1	0.2	1.5	0.3	0.9	0.1	0.9	0.1	8.3	0.2	0.550591	Amazonia Craton	[20057] Siepierski et al., 2016
AUK	SELVA05	46.3415	6.05962	12.6504	8.03252	26.2547	0.0433604	0.151762	0.173442	0.281843	0.0108401	7.46	100	82.8671	47.3301		1691.06	132	1310	77.6	999	1.2	12.1		2.9	0.2	0.6		1.6	1.2	0.5	2.8	0.9	0.3	1.1	0.2	1.6	0.3	0.9	0.1	0.8	0.1	8.8		0.361325	Amazonia Craton	[20057] Siepierski et al., 2016
AUK	SERINGA01	45.0043	6.03782	13.6549	8.29394	25.8165	0.0752041	0.483455	0.247099	0.354534	0.0322303	6.38	100	81.5025	140.724		2127.2	129	1370	99.2	1140	0.7	23.7	10	12.6	0.5	0.7	0.08	1.1	2.7	0.4	2.1	0.6	0.2	0.8	0.1	1.2	0.2	0.7	0.1	0.7		6.7	0.2	0.613158	Amazonia Craton	[20057] Siepierski et al., 2016
AUK	SELVA03	46.457	7.76438	12.8904	8.15206	23.7131	0.0538445	0.258454	0.258454	0.38768	0.0646134	6.86	100	81.0863	282.115		2326.08	141	1350	162.5	1020	1.2	29.7	10	18.6	0.7	1.4	0.2	2.8	4.4	0.9	4.5	1.3	0.3	1.5	0.2	1.8	0.4	1.2	0.1	0.9	0.1	10	0.7	0.481767	Amazonia Craton	[20057] Siepierski et al., 2016
AUK	SELVA10	45.2563	8.39183	13.5822	8.4131	23.378	0.0319081	0.212721	0.287173	0.372261	0.0744522	5.41	100	80.0451	325.073		2233.57	157	1290	101.5	1110	0.4	24.4		23.3	0.9	1.3	0.1	3.8	3.8	1	4.9	1.3	0.4	1.7	0.3	1.9	0.4	1.1	0.1	0.9	0.1	11.2	0.9	0.32963	Amazonia Craton	[20057] Siepierski et al., 2016
AUK	SELVA07	45.7914	7.66981	12.4147	7.74564	25.306	0.0433323	0.335825	0.259994	0.400823	0.0324992	7.24	100	82.6101	141.898		2404.94	155	1400	83.1	1120	0.5	29.5		15.6	0.6	1.2	0.09	6.1	10.2	1.9	8.8	1.8	0.4	2.2	0.3	2.4	0.5	1.4	0.2	1.3	0.2	13.6	0.6	0.189548	Amazonia Craton	[20057] Siepierski et al., 2016
B-2	F1065/49	53.4599	13.9818	13.1108	6.0279	6.68378	2.01971	3.28984	0.458079	0.874514	0.0936979	4.4	100	54.2976	409.104		5247.08	273	90	51.6	51	60.4	144	1045	100		4.3	0.4	14	27.9	3.06	12.2	2.61	0.85	3.56	0.52	3.44	0.7	2.18	0.35	2.11	0.33	20.4	4.46	0.295943	Amazonia Craton	[21517] Martins et al., 2017
B-2	TF14-XII-015B	52.0833	14.3849	9.12698	13.3929	6.84524	0.0992063	2.48016	0.198413	1.19048	0.198413	1.3	100	63.6082	866.309	34	7142.86	235	350	23	128	1.3	422	18.9	97	1.1	5.3	0.3	9.5		2.5	10.9	2.9	1	4.4	0.8	4.7	1	3.1	0.5	2.7	0.5	28.4	0.9	0.537551	Amazonia Craton	[20879] Borges et al., 2017
B-2	PFG-CA-019B	53.1746	10.0198	11.7063	10.9127	11.3095	0.0992063	1.78571	0.198413	0.694444	0.0992063	1.7	100	69.245	433.154	41	4166.67	280	600	58	256	0.8	143	20.2	38	2.6	1.4	0.2	2.5		0.8	4.1	1.4	0.6	2.4	0.4	2.7	0.5	1.4	0.2	1.2	0.2	14.6	0.2	0.539579	Amazonia Craton	[20879] Borges et al., 2017
B-2	TF14-XII-079B	52.3279	10.6446	11.54	7.56068	15.0219	0.0994827	2.18862	0.198965	0.397931	0.0198965	3.1	100	75.2087	86.8722	35	2387.58	186	1280	63	384	0.8	114.5	29.5	20	1.3	0.8	0	1.3	3.4	0.5	2.5	0.9	0.4	1.4	0.2	1.6	0.4	1.2	0.2	1.2	0.2	10.4	0.1	0.592944	Amazonia Craton	[20879] Borges et al., 2017
B-2	PFG-CA-019A	53.7	8.8	11.2	11.2	12.2	0.1	1.8	0.2	0.7	0.1	1.6	100	71.7401	436.62	41	4200	272	870	57	275	1	177	13.9	36	2.7	1.5	0.2	2.2		0.9	3.7	1.3	0.7	2.3	0.4	2.6	0.5	1.6	0.2	1.4	0.2	14.1	0.2	0.656955	Amazonia Craton	[20879] Borges et al., 2017
HMA	D23	57.6152	16.2325	7.31463	6.41283	5.81162	0.300601	5.21042	0.1002	0.801603	0.200401	2.5	100	64.9323	874.989		4809.62	140	230	30.1	128	7.7	606	43.5	126	3.5	5.5	0.3	15.7	33.3	3.8	16.3	3.5	1.3	3.4	0.5	2.9	0.5	1.3	0.2	1.6	0.2	14.7	2.3	0.337544	Amazonia Craton	[20879] Borges et al., 2017
HMA	PFG-CA-016A	54.0837	13.3466	11.255	9.66135	7.17131	0.298805	2.58964	0.199203	1.19522	0.199203	1.7	100	59.7573	869.76	32	7171.31	245	340	49	110	7.6	331	51.3	90	0.3	8.6	0.4	7.7	18.6	2.6	11.6	3.1	1.2	4.3	0.7	4.8	1	2.9	0.4	2.7	0.4	25.8	0.8	1.07616	Amazonia Craton	[20879] Borges et al., 2017
HMA	PFG-CA-004A	57.5668	14.9357	7.51731	5.24233	8.70425	0.098912	5.04451	0.098912	0.593472	0.197824	2.4	100	72.9618	863.738	16	3560.83	97	440	37	231	1.7	485	53.7	82	2.2	4.9	0.3	14.8	30.5	3.8	13.6	2.9	1	2.7	0.4	2.3	0.4	1.3	0.2	1.3	0.2	12.4	1.5	0.319008	Amazonia Craton	[20879] Borges et al., 2017
HMA	PFG-CA-017A	54.1916	11.0778	11.6766	9.48104	8.78244	0.0998004	3.49301	0.199601	0.898204	0.0998004	1	100	63.6741	435.748	37	5389.22	302	570	52	191	1.3	342	19	47	2.5	2.1	0.2	2.6	6.4	1	4.9	1.7	0.7	2.6	0.5	3.2	0.7	2	0.3	1.6	0.3	17.7	0.2	0.778239	Amazonia Craton	[20879] Borges et al., 2017
HMA	TF14-XII-178	54.8355	15.5533	8.87338	5.88235	8.97308	0.0997009	4.48654	0.0997009	0.897308	0.299103	2.8	100	70.2087	1305.94	18.9	5383.85	134	430	37.3	237	2.1	474	43.3	106	1.1	12.2	0.5	15.1	31.5	3.8	15.4	3.6	1.2	3.7	0.5	3	0.6	1.5	0.3	1.6	0.3	16.7	1.2	0.778485	Amazonia Craton	[20879] Borges et al., 2017
HMA	PFG-CA-004G	55.511	14.6293	7.11423	5.51102	9.91984	0.200401	5.31062	0.1002	1.1022	0.601202	2.4	100	76.4682	2624.97	21	6613.23	145	710	40	200	4	481	59.5	252	5.2	11	0.6	31.4	67.2	8.4	33.2	6.3	2	5.4	0.7	3.7	0.7	1.6	0.2	1.2	0.2	16.8	1.7	0.337544	Amazonia Craton	[20879] Borges et al., 2017
HMA	PFG-CA-004D	55.5336	14.3281	9.68379	4.64427	11.0672	0.0988142	4.05138	0.197628	0.296443	0.0988142	3.1	100	72.7032	431.442	13	1778.66	80	780	44	347	1.6	264	17.6	54	1.4	2.6	0.2	10.8	22.5	2.8	11.4	2.2	1	2.2	0.3	1.7	0.3	0.9	0.1	0.7	0.1	8.4	0.4	0.231962	Amazonia Craton	[20879] Borges et al., 2017
HMA	PFG-CA-004B	54.9951	12.9575	7.91296	6.23145	11.7705	0.098912	4.25321	0.098912	1.18694	0.49456	2.6	100	77.6117	2159.35	21	7121.66	134	910	43	247	3.9	309	38.3	136	3.5	10.3	0.6	29.4	66.7	8.6	34.3	6.5	1.9	5.5	0.7	3.7	0.6	1.7	0.2	1.2	0.2	17	1.8	0.337565	Amazonia Craton	[20879] Borges et al., 2017
HMA	PFG-CA-004E	54.4545	12.6126	9.40941	6.20621	12.5125	0.1001	3.6036	0.2002	0.600601	0.3003	2.9	100	75.6042	1311.17	14	3603.6	99	840	45	473	2	200	30.7	153	3.5	4.7	0.3	17.9	38	4.9	19.3	3.3	1.1	3.1	0.4	2.3	0.4	1.1	0.2	1	0.2	11.4	0.9	0.252995	Amazonia Craton	[20879] Borges et al., 2017
HMA	F1279/G	54.1097	14.0801	12.5031	7.26214	5.47501	1.57019	3.57425	0.454529	0.878068	0.0929719	3.07	100	50.5076	405.934		5268.41	269	100	52.5	48	49.2	217	890	99		4.2	0.4	14.7	28.9	3.35	12.9	2.65	0.83	3.63	0.61	3.83	0.79	2.47	0.34	2.27	0.34	21.7	4.54	0.275296	Amazonia Craton	[21517] Martins et al., 2017
HMA	F1100/176	54.8131	14.612	11.8517	6.13061	5.72674	2.77535	2.83748	0.34174	0.818105	0.0932019	2.99	100	52.9654	406.938		4908.63	254	100	46.2	63	96.5	138	1380	100		4.4	0.4	14.1	27.7	3.08	12.2	2.82	0.73	3.31	0.56	3.34	0.71	2.28	0.3	2.16	0.31	19.9	4.69	0.300677	Amazonia Craton	[21517] Martins et al., 2017
HMA	F1065/56	55.0102	13.8681	13.2883	6.21497	5.4137	1.46899	3.1229	0.585543	0.924541	0.102727	2.86	100	48.7036	448.526		5547.25	252	60	47.6	42	36.2	167.5	834	110		4.6	0.5	16	30.9	3.53	13.9	3.05	0.88	3.94	0.61	3.82	0.78	2.38	0.36	2.44	0.36	23.7	4.85	0.277016	Amazonia Craton	[21517] Martins et al., 2017
HMA	F1051/01	54.2584	14.0889	11.5419	8.32669	5.27426	1.70271	3.50925	0.404914	0.809827	0.0830592	3.11	100	51.5729	362.653		4858.96	257	120	47.4	47	50.3	230	991	92		3.8	0.4	13.9	27.3	3.09	12.2	2.64	0.81	3.57	0.54	3.51	0.74	2.2	0.3	2.11	0.28	20.5	4.34	0.263412	Amazonia Craton	[21517] Martins et al., 2017
HMA	F1065/47	56.1775	13.7343	11.891	6.03862	5.46933	2.34835	3.1718	0.264317	0.813283	0.0914943	2.7	100	51.7357	399.482		4879.7	231	80	45.5	42	82.2	140.5	1085	104		4.6	0.5	17.3	34.3	3.86	14.6	3.5	0.79	3.57	0.65	3.66	0.76	2.31	0.36	2.59	0.37	22.8	5.9	0.2562	Amazonia Craton	[21517] Martins et al., 2017
HMA	F1100/175	54.761	14.2815	12.0589	6.3678	5.84568	2.68226	2.78463	0.327604	0.798534	0.0921386	2.8	100	53.0459	402.295		4791.2	261	100	52.9	52	91.1	164.5	1280	98		4	0.4	15.2	29.9	3.25	13	2.71	0.78	3.6	0.53	3.57	0.7	2.1	0.31	2.27	0.34	20.4	4.69	0.253562	Amazonia Craton	[21517] Martins et al., 2017
HMA	F1065/54	55.5545	13.786	13.4347	5.89215	5.25571	1.74506	2.80236	0.482458	0.944386	0.102651	3.08	100	47.6905	448.193		5666.32	262	50	50.7	37	48.1	141	1185	113		4.7	0.5	16.8	32	3.58	13.7	2.92	0.86	3.62	0.59	3.89	0.74	2.61	0.41	2.49	0.38	21.7	5.26	0.26956	Amazonia Craton	[21517] Martins et al., 2017
HMA	F1115/92	55.9444	13.9157	12.9093	4.48222	6.01452	2.18899	3.16883	0.437799	0.844326	0.093814	3.88	100	52.0565	409.61		5065.96	241	90	45.3	50	76.3	110	1885	115		5.3	0.5	17.4	38	4.18	16.1	3.74	0.73	3.88	0.69	4.04	0.9	2.63	0.39	2.56	0.38	25	6.63	0.29349	Amazonia Craton	[21517] Martins et al., 2017
HMA	F1115/96	55.8838	14.1531	13.6454	3.84006	5.96302	1.59222	3.51746	0.457894	0.853347	0.09366	3.98	100	50.4564	408.938		5120.08	243	100	45.7	52	53.8	114	1165	116		5.3	0.6	18.1	37.5	4.03	15.1	3.4	0.85	3.74	0.68	3.85	0.9	2.48	0.38	2.63	0.36	23.5	6.51	0.28214	Amazonia Craton	[21517] Martins et al., 2017
HMA	F1100/172	54.7088	14.3641	11.0982	6.31571	5.9261	1.46615	4.83931	0.440869	0.758705	0.0820222	2.38	100	55.445	358.125		4552.23	234	110	43	38	34.8	129	539	91		4.1	0.4	12.5	25	2.81	11	2.67	0.67	2.96	0.49	2.93	0.56	1.88	0.28	1.81	0.26	17.8	4.33	0.316039	Amazonia Craton	[21517] Martins et al., 2017
HMA	F1065/51	55.0776	13.6467	13.5911	5.80625	5.24403	2.41246	2.77024	0.439558	0.909783	0.102223	2.84	100	47.3465	446.325		5458.7	258	60	51.4	34	70.3	185	1500	111		4.7	0.4	16.3	32.2	3.58	14.3	3.05	0.78	3.59	0.63	3.66	0.78	2.53	0.34	2.32	0.33	22.7	5.05	0.277829	Amazonia Craton	[21517] Martins et al., 2017
HMA	F1100/178	54.3133	14.3171	11.9645	7.02328	5.97239	2.42433	2.70526	0.34336	0.842793	0.0936437	3.82	100	53.7748	408.867		5056.76	267	120	51.8	57	76.3	151.5	1160	102		4.3	0.4	14.8	29.6	3.21	13.1	2.91	0.83	3.74	0.64	3.76	0.82	2.32	0.3	2.09	0.35	22.4	4.99	0.279946	Amazonia Craton	[21517] Martins et al., 2017
HMA	F1100/174	54.3062	13.9588	12.0728	8.30711	5.43475	1.72548	3.00668	0.351296	0.754252	0.0826578	2.77	100	51.1983	360.9		4525.51	253	100	45.3	48	51.4	241	744	94		3.7	0.4	15.9	30.9	3.44	13.1	2.92	0.98	3.73	0.57	3.5	0.75	2.31	0.33	2.24	0.32	21.6	4.45	0.224219	Amazonia Craton	[21517] Martins et al., 2017
HMA	F1115/93	54.8964	14.3145	14.1133	3.48499	6.89715	1.56044	3.37056	0.395312	0.873848	0.0936265	3.97	100	53.2473	408.792		5243.09	249	100	46.3	56	46.1	101	800	117		5.4	0.5	19.1	40.2	4.39	16.8	3.65	1	4.04	0.7	4.25	0.88	2.67	0.37	2.68	0.36	23.6	6.86	0.272413	Amazonia Craton	[21517] Martins et al., 2017
HMA	F1065/48	56.0997	13.8254	12.5042	5.93539	5.50559	2.04669	2.92676	0.245602	0.818674	0.0921009	2.69	100	50.6446	402.131		4912.05	235	80	47.1	43	72	156	903	105		4.7	0.5	18	35.4	3.99	15.2	3.28	0.77	3.63	0.57	3.86	0.73	2.55	0.39	2.48	0.37	22.4	6.21	0.25159	Amazonia Craton	[21517] Martins et al., 2017
HMA	F1065/43	57.2991	14.3689	11.025	4.63044	5.4091	1.88955	4.11133	0.311464	0.861718	0.0934393	3.93	100	53.3449	407.974		5170.31	237	80	43.7	54	58.9	104.5	1030	107		4.8	0.5	19.6	36.2	4.14	16.2	3.7	0.85	3.82	0.65	3.99	0.8	2.69	0.36	2.7	0.4	23.4	6.23	0.235968	Amazonia Craton	[21517] Martins et al., 2017
HMA	F1100/173	54.2948	14.2919	12.2319	5.8675	6.01012	2.85226	3.11711	0.478772	0.774184	0.0814931	2.46	100	53.3818	355.815		4645.11	248	100	46.3	32	90.3	165	2650	93		4.1	0.4	13.7	27.3	3.19	12.1	2.79	0.67	3.03	0.49	3.23	0.64	2.04	0.3	1.88	0.28	18.9	4.47	0.288357	Amazonia Craton	[21517] Martins et al., 2017
HMA	F1279/D	54.4997	14.0022	12.897	5.99507	5.60498	1.64249	4.03435	0.349028	0.882836	0.0923898	2.84	100	50.3186	403.392		5297.01	250	90	51.4	48	66.1	196.5	786	107		4.4	0.4	17.2	33.7	3.78	14.6	3.17	0.92	4.08	0.65	3.86	0.81	2.5	0.38	2.34	0.34	24.3	4.89	0.246486	Amazonia Craton	[21517] Martins et al., 2017
HMA	F1051/173	55.1344	14.2545	11.9377	6.60798	5.06035	2.47417	3.15635	0.386908	0.885816	0.101818	2.07	100	49.6954	444.557		5314.89	261	100	46.9	48	83.5	228	1505	111		4.8	0.4	18	36.1	3.97	15.1	3.15	1.02	3.88	0.61	3.96	0.83	2.45	0.34	2.42	0.34	22.6	5.26	0.256942	Amazonia Craton	[21517] Martins et al., 2017
HMA	F1065/58	54.8841	13.9214	11.5094	7.11993	5.70211	1.53084	4.02744	0.421237	0.801378	0.0821926	2.54	100	53.5877	358.869		4808.27	242	70	43.2	28	39.3	131.5	874	92		4.2	0.4	14.6	27.4	3.06	12.2	2.73	0.71	3.28	0.53	3.42	0.69	2.25	0.34	1.92	0.31	19.1	4.35	0.277181	Amazonia Craton	[21517] Martins et al., 2017
HMA	F1065/45	56.4293	14.0177	11.8978	5.08242	5.8202	2.23381	3.30972	0.276664	0.840239	0.0922214	3.36	100	53.2718	402.657		5041.44	234	80	45.9	47	70.6	122.5	1195	105		4.8		18.8	36.8	4.15	15.4	3.35	0.87	3.88	0.65	4.06	0.83	2.6	0.36	2.45	0.39	24.2	6.24	0.246009	Amazonia Craton	[21517] Martins et al., 2017
HMA	F1115/94	55.3429	14.0479	13.1139	4.2237	6.3459	2.38101	3.14707	0.465849	0.838529	0.0931698	3.39	100	53.0018	406.798		5031.17	241	90	47	47	68.4	106.5	1580	102		5.1	0.5	16.7	34	3.57	14.8	3.06	0.89	3.57	0.63	3.68	0.8	2.18	0.35	2.14	0.3	21	5.96	0.294253	Amazonia Craton	[21517] Martins et al., 2017
HMA	F1279/C	54.9801	13.8668	12.6506	6.19794	5.23427	2.12008	3.65181	0.344894	0.85209	0.101439	2.25	100	49.0902	442.904		5112.54	256	90	52.2	46	64.9	196.5	1030	110		4.7	0.4	17	33.1	3.61	14.6	3.06	0.85	4.05	0.62	3.58	0.77	2.32	0.34	2.14	0.34	22.3	5.21	0.266389	Amazonia Craton	[21517] Martins et al., 2017
HMA	F1279/B	55.3096	13.6999	12.69	6.33479	5.05967	1.68316	3.93757	0.306029	0.877282	0.10201	2.57	100	48.165	445.394		5263.69	252	90	49.2	44	50.1	215	743	111		4.8	0.4	17.9	34.3	3.77	14.4	3.29	0.96	3.8	0.61	3.63	0.78	2.26	0.35	2.21	0.32	22	5.17	0.258378	Amazonia Craton	[21517] Martins et al., 2017
HMA	F1100/180	54.163	14.1295	13.2917	6.17648	6.06287	2.32393	2.44787	0.454457	0.857271	0.0929571	3.61	100	51.5276	405.869		5143.62	223	110	51.9	75	54.3	130.5	973	102		4.2	0.4	16.6	33.2	3.66	14.2	3.5	1.05	4.1	0.64	4.24	0.82	2.36	0.28	1.84	0.28	24.3	5.72	0.243786	Amazonia Craton	[21517] Martins et al., 2017
ADK	BCB-16	50.1364	5.25708	13.6097	8.65687	21.1962	0.0104932	0.43022	0.178384	0.472193	0.0524659	4.21	100	78.3999	229.076	18	2833.16	132	2275	65	852	4.7	61	13.4	15	0.5	1.5	0.18	3.81	7.85	1.08	4.9	1.31	0.32	1.72	0.31	1.78	0.38	1.08	0.15	1.03	0.15	6	0.2	0.379344	Dharwar Craton	[22867] Singh et al., 2019
ADK	BCB-18	51.4392	4.49368	12.2386	9.46366	21.2363	0.0207082	0.445227	0.186374	0.434873	0.0414164	3.06	100	80.174	180.832	21	2609.24	158	2328	52	1135	4.3	47	18.5	25	0.8	1.7	0.13	2.97	6.98	1.07	4.02	1.17	0.27	1.41	0.21	1.24	0.27	0.81	0.12	0.69	0.101	8	0.25	0.551518	Dharwar Craton	[22867] Singh et al., 2019
ADK	BCB-17	50.3402	5.10309	12.7423	8.5567	21.7526	0.134021	0.690722	0.175258	0.474227	0.0309278	2.02	100	79.9134	135.037	18	2845.36	142	2930	78	971	4.2	70	15.9	31	0.9	1.5	0.1	3.2	7.2	1.05	4.5	1.21	0.31	1.52	0.28	1.63	0.35	0.99	0.14	0.94	0.12	9	0.41	0.451657	Dharwar Craton	[22867] Singh et al., 2019
ADK	BCB-19	52.7862	4.586	11.5647	7.8812	22.1639	0.0104943	0.409277	0.157414	0.409277	0.0314828	4.32	100	81.7066	137.46	19	2455.66	148	2657	81	1201	3.4	66	15	16	0.6	1.4	0.1	2.58	5.83	0.84	3.41	1.03	0.25	1.35	0.19	1.14	0.24	0.72	0.101	0.76	0.11	9	0.31	0.522848	Dharwar Craton	[22867] Singh et al., 2019
ADK	BCB-15	51.4614	5.00585	12.2223	7.73727	22.3297	0.0425125	0.531406	0.191306	0.435753	0.0425125	5.01	100	80.9804	185.618	15	2614.52	84	2652	75	1058	3.9	59	12.8	21	0.7	1.6	0.15	2.89	6.58	0.95	3.54	1.1	0.29	1.48	0.24	1.46	0.31	0.91	0.13	0.85	0.13	7	0.35	0.533445	Dharwar Craton	[22867] Singh et al., 2019
ADK	RM319	49.1751	3.87709	12.3324	8.14601	25.7785	0.0412456	0.154671	0.175294	0.309342	0.0103114	3.01	100	82.9684	45.0216	17.59	1856.05	725	2825	65.31	803	0.55	16.49	20.81		0.19	1.59	0.12	2.2	6.29	1.1	3.84	1.26	0.43	1.34	0.3	1.53	0.38	0.88	0.14	0.96	0.16	8.42		0.696373	Dharwar Craton	[8972] Naqvi et al., 2002
ADK	RM334	46.7567	3.93902	13.9452	7.28463	27.1844	0.0409249	0.276243	0.204625	0.33763	0.0306937	3.01	100	81.9593	134.015	19.37	2025.78	581	2176	74.02	946	0.31	38.96	23.51		0.29	0.91	0.08	1.2	3.3	0.47	2.44	0.82	0.31	1.11	0.21	1.35	0.29	0.86	0.13	0.93	0.15	7.46		0.73068	Dharwar Craton	[8972] Naqvi et al., 2002
AUK	STV4	50.405	4.72047	8.53085	5.27053	30.6131	0.030003	0.070007	0.130013	0.20002	0.030003		100	89.3197	130.999	24	1200.12	115	3204		737	1.38	9.6	10	22	0.62	0.83		2.34	4.42		2.87	0.79	0.29	0.96	0.17	1.12	0.25	0.72	0.11	0.79	0.13	7.1	0.47	0.341766	Dharwar Craton	[20666] Khanna et al., 2016
AUK	RM329	46.7044	6.22039	13.0999	7.31205	25.7364	0.0411946	0.329557	0.185376	0.350154	0.0205973	2.81	100	82.0742	89.932	25.37	2100.93	688.13	2382	76	852	0.34	33.8	13.47		0.37	0.93	0.08	1.48	3.89		3	0.98	0.35	1.25	0.29	1.58	0.46	0.94	0.15	1.12	0.19	8.79		0.605464	Dharwar Craton	[8972] Naqvi et al., 2002
AUK	SIG-28	47.5442	9.55074	7.51911	10.9436	23.5627	0.0628338	0.314169	0.125668	0.356058	0.0209446	4.21	100	87.9563	91.4483	19	2136.35	144	2383	92	780				12	0.29	0.15	0.04	0.4	1		1.07	0.43	0.13	0.65	0.14	0.86	0.2	0.66	0.09	0.59	0.08	5.4	0.03	0.361325	Dharwar Craton	[17629] Manikyamba et al., 2013
AUK	SIG-98	48.5873	15.8818	10.9589	2.73973	20.655	0.0428082	0.0535103	0.107021	0.920377	0.0535103	5.82	100	81.4555	233.636	19	5522.26	165	2483	83	1154				65	1.49	1.03	0.06	3.8	8.53		7.11	2.01	0.6	2.61	0.47	2.66	0.54	1.62	0.22	1.4	0.21	13	0.48	0.261169	Dharwar Craton	[17629] Manikyamba et al., 2013
AUK	STV1	51.96	4.83	9.07	2.99	30.71	0.02	0.05	0.12	0.22	0.03		100	88.7524	130.986	25	1320	119	3182		774	1.05	6.82	15	23	0.65	0.93		1.96	3.68		2.79	0.9	0.31	1.08	0.2	1.24	0.28	0.79	0.13	0.89	0.14	7.5	0.66	0.457187	Dharwar Craton	[20666] Khanna et al., 2016
AUK	RM339	45.5856	8.27887	14.7007	6.06909	24.432	0.0414981	0.290487	0.217865	0.363108	0.020749	3.61	100	79.4796	90.5944	24.7	2178.65	719	2644	70.05	761	0.3	7.33	15.75		0.37	1.41	0.14	1.52	4.05		2.86	0.98	0.36	1.26	0.22	1.41	0.3	0.93	0.14	1.09	0.18	3.67		0.893805	Dharwar Craton	[8972] Naqvi et al., 2002
AUK	TVKR12	49.3549	6.36064	7.82078	5.55056	30.433	0.050005	0.090009	0.110011	0.20002	0.030003		100	90.0682	130.999	33	1200.12	161	3490		965	2.78	6.81	15	24	0.67	1.1		2.74	5.14		3.08	0.9	0.25	0.99	0.2	1.3	0.31	0.83	0.13	0.91	0.15	8.4	0.68	0.38682	Dharwar Craton	[20666] Khanna et al., 2016
AUK	S10	48.0609	7.02737	10.2187	8.45398	25.3302	0.0845398	0.327592	0.158512	0.317024	0.0211349	4.66	100	85.2439	92.2793	36	1902.15	119	2405	94	966	2.1	58.7	10.7	16	0.53	0.81	0.06	0.89	2.09		1.83	0.63	0.27	0.86	0.16	1.09	0.26	0.76	0.11	0.77	0.11	6.69	0.12	0.876925	Dharwar Craton	[12642] Manikyamba et al., 2008
AUK	STV6	49.7201	4.83903	8.45831	5.71886	30.7339	0.059988	0.079984	0.159968	0.19996	0.029994		100	89.4381	130.96	26	1199.76	139	3431		634	2.64	8.1	14	23	0.67	0.78		1.97	3.8	0.55	2.8	0.91	0.32	1.1	0.2	1.26	0.28	0.8	0.14	0.94	0.15	8.5	0.56	0.381501	Dharwar Craton	[20666] Khanna et al., 2016
AUK	S67	48.3422	7.53454	10.5101	8.36344	24.2933	0.0743889	0.340064	0.159405	0.361318	0.021254	4.99	100	84.3427	92.7991	37	2167.91	160	2529	103	1031	1.3	43.5	3.8	22	0.75	1.46	0.08	1.35	3.06	0.52	2.67	0.81	0.45	1.24	0.19	1.35	0.29	0.92	0.13	0.95	0.15	7.87	0.28	1.04204	Dharwar Craton	[12642] Manikyamba et al., 2008
AUK	TVKR10	50.72	5.35	7.27	3.78	32.54	0.01	0.03	0.12	0.15	0.03		100	91.252	130.986	25	900	124	3540		966	0.55	3.51	4	16	0.46	0.68		1.29	2.68	0.41	1.84	0.54	0.16	0.65	0.13	0.88	0.2	0.55	0.09	0.6	0.1	5.6	0.42	0.50791	Dharwar Craton	[20666] Khanna et al., 2016
AUK	TVKR4	50.4101	5.70114	7.45149	4.64093	31.2963	0.05001	0.080016	0.130026	0.210042	0.030006		100	90.7305	131.012	29	1260.25	143	3502		953	1.75	4.65	9	21	0.59	1.14		2.31	4.57	0.66	2.84	0.77	0.24	0.9	0.16	1.13	0.25	0.73	0.12	0.78	0.13	7.2	0.55	0.47551	Dharwar Craton	[20666] Khanna et al., 2016
AUK	TVKR16	49.99	5.85	7.13	6.03	30.36	0.09	0.15	0.14	0.23	0.03		100	90.8454	130.986	29	1380	151	3280		604	3.61	9.36	19	25	0.74	0.87		2.48	4.81	0.67	2.91	0.84	0.3	1.1	0.21	1.32	0.3	0.86	0.14	0.96	0.15	8.3	0.52	0.338014	Dharwar Craton	[20666] Khanna et al., 2016
AUK	SIG-15	47.0758	8.43869	7.58557	10.885	25.1824	0.0513927	0.308356	0.133621	0.318635	0.0205571	2.58	100	88.5541	89.7563	22	1911.81	155	2704	83	916				11	0.27	0.14	0.01	0.37	1.02	0.2	1.06	0.41	0.15	0.65	0.15	0.95	0.22	0.67	0.1	0.63	0.09	5.8	0.04	0.364581	Dharwar Craton	[17629] Manikyamba et al., 2013
AUK	SIG-102	50.8763	14.3707	9.92034	3.15454	20.6054	0.031864	0.031864	0.116835	0.828465	0.0637281	5.01	100	82.8786	278.249	20	4970.79	166	2109	65	690				58	1.34	0.84	0.05	3.67	7.77	1.16	5.34	1.5	0.52	1.78	0.3	1.6	0.34	1.05	0.15	1.01	0.15	8	0.48	0.220536	Dharwar Craton	[17629] Manikyamba et al., 2013
AUK	SIG-26	48.6721	8.15335	8.11202	11.4085	22.7343	0.0826702	0.330681	0.134339	0.341015	0.0310013	2.96	100	86.7221	135.358	18	2046.09	148	2344	85	815				24	0.48	0.21	0.05	0.76	1.83	0.31	1.57	0.56	0.18	0.79	0.16	0.96	0.22	0.65	0.1	0.64	0.09	5.8	0.07	0.26624	Dharwar Craton	[17629] Manikyamba et al., 2013
AUK	TVKR9	51.5048	5.22948	7.23928	4.22958	31.3469	0.029997	0.059994	0.109989	0.219978	0.029997		100	90.9839	130.973	26	1319.87	125	3855		880	0.99	3.95	6	18	0.5	0.74		1.41	2.88	0.41	1.81	0.59	0.18	0.67	0.13	0.91	0.21	0.59	0.1	0.63	0.11	5.9	0.52	0.505685	Dharwar Craton	[20666] Khanna et al., 2016
AUK	TVKR17	49.2349	8.22082	7.84078	7.16072	26.7227	0.090009	0.250025	0.140014	0.30003	0.040004		100	88.8177	174.665	30	1800.18	153	2773		700	3.65	5.8	14	21	0.6	0.87		1.7	3.63	0.53	2.35	0.74	0.27	0.93	0.17	1.24	0.28	0.8	0.13	0.89	0.15	8.4	0.56	0.493103	Dharwar Craton	[20666] Khanna et al., 2016
AUK	SIG-159	45.6799	14.9066	8.61905	5.48581	24.4752	0.0421985	0.0843971	0.126596	0.548581	0.0316489	6.2	100	86.8729	138.185	26	3291.49	187	2863	74	624				21	0.46	0.22	0.01	0.41	1.16	0.22	1.21	0.47	0.22	0.72	0.15	0.93	0.21	0.65	0.09	0.57	0.09	5.4	0.05	0.517018	Dharwar Craton	[17629] Manikyamba et al., 2013
AUK	SIG-27	49.1735	8.504	7.20449	10.9887	23.2872	0.0519805	0.291091	0.135149	0.332675	0.0311883	3.69	100	88.2807	136.174	19	1996.05	140	2599	77	848				15	0.35	0.21	0.02	0.48	1.34	0.25	1.27	0.48	0.15	0.73	0.15	0.95	0.22	0.69	0.1	0.63	0.1	5.8	0.07	0.421546	Dharwar Craton	[17629] Manikyamba et al., 2013
AUK	TVKR3	51.3151	4.9505	7.42074	3.55036	32.4132	0.010001	0.040004	0.110011	0.160016	0.030003		100	91.055	130.999	18	960.096	82	3688		924	0.26	2.45	5	13	0.36	0.63		1.17	2.54	0.36	1.6	0.51	0.15	0.62	0.12	0.84	0.19	0.52	0.08	0.57	0.09	5.5	0.32	0.518826	Dharwar Craton	[20666] Khanna et al., 2016
AUK	S5	49.2024	7.61965	10.317	7.74559	24.2128	0.0524769	0.27288	0.167926	0.377834	0.0314861	4.77	100	84.5427	137.475	41	2267	256	2331	87	787	0.9	39.2	1.8	24	0.76	1.13	0.08	1.21	3.15	0.53	2.58	0.9	0.29	1.17	0.21	1.45	0.31	0.95	0.14	1	0.14	8.54	0.3	0.89983	Dharwar Craton	[12642] Manikyamba et al., 2008
AUK	S61	49.4558	6.60309	10.2623	9.76469	22.4318	0.850005	0.0932933	0.176221	0.342075	0.0207318	3.15	100	83.5908	90.5193	41	2052.45	149	2714	106	909	0.6	48.6	16.9	19	0.61	1.42	0.06	1.08	2.9	0.5	2.58	0.88	0.61	1.24	0.22	1.46	0.32	1.03	0.12	1	0.14	8.63	0.1	1.26687	Dharwar Craton	[12642] Manikyamba et al., 2008
AUK	SIG-11	47.9666	9.45777	7.91449	11.1783	22.5235	0.0729927	0.354536	0.135558	0.364964	0.0312826	3.96	100	86.8977	136.586	24	2189.78	176	2441	86	794				17	0.37	0.19	0.02	0.55	1.5	0.26	1.37	0.51	0.19	0.82	0.18	1.09	0.25	0.81	0.12	0.76	0.11	7	0.06	0.332857	Dharwar Craton	[17629] Manikyamba et al., 2013
AUK	S7	47.0439	7.92541	11.3583	8.59292	24.0517	0.328459	0.0741683	0.169527	0.423819	0.0317864	4.6	100	83.1506	138.786	45	2542.91	284	2884	106	1033	1	63.1	3.2	22	0.81	1.2	0.1	1.49	3.63	0.56	2.75	0.89	0.36	1.19	0.2	1.46	0.33	0.95	0.13	0.9	0.13	8.05	0.32	0.776001	Dharwar Craton	[12642] Manikyamba et al., 2008
AUK	RM310	47.1041	5.77157	13.3759	5.74119	27.2074	0.0303767	0.18226	0.243013	0.334143	0.0101256	2.78	100	82.5796	44.2102	20.69	2004.86	602	2254	60.79	960	0.31	32.79	15.35		0.31	0.84	0.08	0.94	2.73	0.5	2.23	0.79	0.29	1.1	0.25	1.31	0.34	0.85	0.13	0.99	0.16	7.89		0.861031	Dharwar Craton	[8972] Naqvi et al., 2002
AUK	STV2	49.47	5.77	8.87	5.12	30.24	0.03	0.08	0.15	0.24	0.03		100	88.8209	130.986	25	1440	124	3581		728	2.39	24.5	52	27	0.77	1.08		2.85	5.63	0.7	3	0.87	0.26	1.06	0.2	1.34	0.31	0.87	0.13	0.93	0.14	8.9	0.54	0.365129	Dharwar Craton	[20666] Khanna et al., 2016
AUK	SIG-101	47.5087	13.3572	9.84936	5.51986	22.6483	0.0316022	0.0526704	0.126409	0.811124	0.0948067	5.2	100	84.274	413.945	21	4866.74	206	2261	92	917				58	1.21	0.78	0.03	4.04	9.3	1.34	6.27	1.76	0.6	2.3	0.4	2.25	0.47	1.36	0.19	1.17	0.17	12	0.34	0.186029	Dharwar Craton	[17629] Manikyamba et al., 2013
AUK	STV5	49.3449	5.43054	8.36084	6.73067	29.513	0.070007	0.130013	0.150015	0.240024	0.030003		100	89.1616	130.999	25	1440.14	128	3124		715	2.67	9.18	14	24	0.67	0.79		1.82	4.19	0.6	2.86	0.88	0.39	1.08	0.2	1.29	0.29	0.83	0.13	0.92	0.15	8.3	0.54	0.418237	Dharwar Craton	[20666] Khanna et al., 2016
AUK	SIG-30	46.6246	10.2864	8.36349	9.90386	23.8809	0.0930425	0.258451	0.134395	0.413522	0.0413522	3.15	100	86.9357	180.552	26	2481.13	171	1889	87	610				17	0.42	0.21	0.02	0.67	1.8	0.3	1.6	0.63	0.18	1.01	0.19	1.27	0.3	0.96	0.13	0.91	0.14	7.9	0.06	0.302003	Dharwar Craton	[17629] Manikyamba et al., 2013
AUK	STV3	50.9549	5.15948	8.78912	4.15958	30.337	0.079992	0.079992	0.139986	0.249975	0.049995		100	88.943	218.288	22	1499.85	132	3544		677	3.66	6.68	16	22	0.64	0.95		2.14	4.54	0.59	2.47	0.68	0.26	0.95	0.17	1.16	0.26	0.75	0.12	0.8	0.13	7.5	0.55	0.427737	Dharwar Craton	[20666] Khanna et al., 2016
AUK	S6	49.253	7.07345	9.69596	8.99593	23.9682	0.0626894	0.376136	0.156723	0.397033	0.0208965	4.11	100	85.2092	91.2381	46	2382.2	274	2386	89	983	0.7	91	2.1	25	1.01	2.02	0.07	1.14	3.08	0.5	2.67	0.87	0.33	1.43	0.23	1.56	0.33	1.02	0.17	1.05	0.16	13.88	0.32	1.70732	Dharwar Craton	[12642] Manikyamba et al., 2008
AUK	SIG-22	47.7423	8.0261	7.20795	12.1582	23.9229	0.08285	0.362469	0.134631	0.341756	0.0207125	3.17	100	88.5516	90.4349	21	2050.54	149	2513	85	875				16	0.35	0.29	0.01	0.55	1.58	0.27	1.48	0.52	0.19	0.8	0.17	1.01	0.23	0.72	0.1	0.65	0.1	6.2	0.04	0.508045	Dharwar Craton	[17629] Manikyamba et al., 2013
AUK	SIG-12	46.4157	7.67406	8.1279	12.1815	24.6519	0.0928314	0.38164	0.13409	0.319752	0.0206292	2.92	100	87.606	90.0711	20	1918.51	161	2485	82	818				15	0.32	0.2	0.01	0.56	1.63	0.28	1.46	0.55	0.19	0.81	0.16	0.99	0.22	0.71	0.1	0.67	0.1	6	0.06	0.344119	Dharwar Craton	[17629] Manikyamba et al., 2013
AUK	S2	49.5029	6.76263	10.2734	9.31027	23.2394	0.0621375	0.3314	0.1657	0.341756	0.0103563	3.52	100	84.0557	45.2175	40	2050.54	250	2363	86	900	1.2	41.5	2.3	21	0.65	1.2	0.09	1.29	3.36	0.51	2.45	0.81	0.39	1.05	0.2	1.39	0.29	0.89	0.13	0.89	0.13	7.87	0.21	0.896311	Dharwar Craton	[12642] Manikyamba et al., 2008
AUK	TVKR18	49.51	8.5	8.2	6.85	26.16	0.09	0.22	0.14	0.29	0.04		100	88.1444	174.648	38	1740	195	2969		813	4	7.09	16	24	0.69	0.93		2.09	4.95	0.68	2.95	0.79	0.29	1.13	0.22	1.5	0.34	0.99	0.16	1.07	0.17	9.9	0.67	0.42875	Dharwar Craton	[20666] Khanna et al., 2016
AUK	TVKR2	51.0202	5.30106	7.30146	2.29046	33.7467	0.020004	0.040008	0.110022	0.140028	0.030006		100	91.5048	131.012	26	840.168	127	3784		916	0.92	2.87	7	18	0.49	0.99		1.1	2.72	0.38	1.76	0.55	0.16	0.65	0.13	0.86	0.2	0.58	0.09	0.63	0.1	5.8	0.5	0.867181	Dharwar Craton	[20666] Khanna et al., 2016
AUK	TVKR20	48.6049	9.19092	8.18082	9.66097	23.5524	0.110011	0.260026	0.140014	0.260026	0.040004		100	87.0289	174.665	32	1560.16	167	2290		731	3.31	6.15	17	28	0.79	1.22		2.66	6.04	0.77	3.29	0.92	0.32	1.13	0.22	1.48	0.34	0.93	0.15	1.02	0.17	9.4	0.75	0.441922	Dharwar Craton	[20666] Khanna et al., 2016
AUK	SIG-23	47.8229	8.52041	6.52605	12.081	24.1203	0.104417	0.365459	0.114859	0.323692	0.0208834	3.88	100	89.598	91.1809	17	1942.15	138	2239	77	1000				15	0.33	0.19	0.01	0.59	1.69	0.27	1.42	0.51	0.14	0.79	0.16	0.99	0.24	0.75	0.11	0.73	0.11	6.4	0.11	0.310291	Dharwar Craton	[17629] Manikyamba et al., 2013
AUK	SIG-96	46.382	11.7059	8.42448	5.74253	26.7143	0.0525873	0.0841397	0.115692	0.715187	0.0631048	5.8	100	88.0812	275.528	15	4291.12	143	2024	70	736				66	1.49	0.86	0.04	2.68	7.11	1.03	4.63	1.55	0.42	2.22	0.42	2.43	0.51	1.56	0.22	1.35	0.2	13	0.51	0.309194	Dharwar Craton	[17629] Manikyamba et al., 2013
AUK	RM340	50.4664	4.43115	11.5494	9.10566	23.5348	0.0506997	0.395457	0.192659	0.253498	0.0202799	1.91	100	82.6056	88.5459	10	1520.99	310	11.04	48.5	614	0.37	47.06	13.48	7.03	0.27	0.69	0.06	1.93	5.09	0.72	3.71	1.28	0.45	1.65	0.4	2.02	0.55	1.16	0.18	1.25	0.2	12.04		0.344476	Dharwar Craton	[8972] Naqvi et al., 2002
AUK	RM330	46.0213	5.77317	14.92	5.03486	27.4303	0.0307629	0.205086	0.21534	0.348646	0.0205086	2.01	100	81.0771	89.5447	18.66	2091.88	532	1958	66.56	902	0.32	29.99	20.07		0.2	0.72	0.05	1.17	3.12	0.43	2.23	0.75	0.28	1.02	0.18	1.27	0.26	0.8	0.12	0.89	0.14	7.46		0.592944	Dharwar Craton	[8972] Naqvi et al., 2002
AUK	SIG-16	47.6685	8.95212	7.97591	10.6449	23.99	0.0519265	0.238862	0.145394	0.311559	0.0207706	3.32	100	87.5151	90.6885	14	1869.35	133	2152	87	796				9	0.23	0.16	0.01	0.25	0.8	0.13	0.73	0.28	0.08	0.45	0.1	0.61	0.14	0.43	0.07	0.43	0.07	3.7	0.03	0.616662	Dharwar Craton	[17629] Manikyamba et al., 2013
AUK	RM333	48.7858	5.94515	9.22127	11.3565	23.6341	0.0418673	0.450073	0.157002	0.324471	0.0837346	3.75	100	85.6591	365.602	44.48	1946.83	431	1193	43.38	144	46.15	83.68	43.49		0.39	1.65	0.13	2.38	6.28	0.84	4.62	1.52	0.61	2.2	0.5	2.76	0.69	1.63	0.26	1.86	0.3	15.18		0.667997	Dharwar Craton	[8972] Naqvi et al., 2002
AUK	RM338	48.2697	4.64921	14.5577	2.90312	28.9997	0.0420743	0.0946671	0.199853	0.273483	0.0105186	3.91	100	82.2773	45.9261	15.87	1640.9	460	1710	62.9	690	0.54	7.53	20.02		0.27	0.85	0.07	1.18	3.13	0.42	2.11	0.67	0.24	0.87	0.2	1.05	0.26	0.67		0.7	0.1	6.14		0.694071	Dharwar Craton	[8972] Naqvi et al., 2002
AUK	S19	49.1836	7.56997	10.4856	6.34012	25.4771	0.127226	0.243851	0.148431	0.402884	0.0212044	5.49	100	84.9906	92.5826	44	2417.3	188	2834	113	970	2	8.4	1.4	21	0.69	1.33	0.08	0.68	2.43	0.43	2.45	0.83	0.41	1.19	0.23	1.54	0.35	1.08	0.15	1.03	0.15	9.18	0.11	1.88456	Dharwar Craton	[12642] Manikyamba et al., 2008
AUK	SIG-29	47.5892	9.61197	7.55151	10.8252	23.5331	0.0522958	0.313775	0.135969	0.36607	0.0209183	4.01	100	87.8973	91.3335	19	2196.42	154	2357	87	780				12	0.27	0.16	0.02	0.43	1.32	0.2	1.07	0.41	0.14	0.66	0.14	0.9	0.21	0.66	0.1	0.6	0.1	5.6	0.03	0.358524	Dharwar Craton	[17629] Manikyamba et al., 2013
AUK	S3	48.4652	6.95652	10.3719	8.65375	24.6726	0.0733368	0.261917	0.167627	0.356207	0.0209534	4.22	100	84.7183	91.4866	45	2137.24	257	2557	94	1017	1.2	75.7	3.5	24	0.59	1.54	0.06	1.19	3.38		2.55	0.84	0.22	1.06	0.19	1.34	0.31	0.79	0.12	0.86	0.14	11.79	0.26	1.24693	Dharwar Craton	[12642] Manikyamba et al., 2008
AUK	SIG-51	47.3348	8.79673	6.807	5.37229	30.998	0.0314169	0.0733061	0.0942507	0.450309	0.0418892	5.4	100	91.3888	182.897	13	2701.85	112	2863	80	847				33	0.74	1.03	0.04	1.7	5.22		3.49	1.14	0.29	1.6	0.32	1.9	0.41	1.25	0.18	1.13	0.17	10	0.19	0.583788	Dharwar Craton	[17629] Manikyamba et al., 2013
B-1	61	49.1098	9.30186	13.2927	9.59192	16.8134	0.090018	0.830166	0.20004	0.710142	0.060012		100	74.6692	262.024	28.7	4260.85	214	2566.1	99	811.8	4	57	7	44.8	1.3	4.6	0.26	2.8	5.5		4.5	1.5	0.5	1.7	0.41	2.4	0.52	1.3	0.2	1.3	0.2	13.1	1.1	1.58295	Dharwar Craton	[13382] Kunugiza et al., 1996
B-1	RM227	49.6115	7.6467	10.8465	12.8501	16.4077	0.408914	1.28808	0.21468	0.654263	0.07156	2.05	100	77.9025	312.445	24.61	3925.58	660	2462	75.37	810	0.99	30.04	12.98	8.45	0.36	1.77	0.15	1.35	3.52	0.66	2.55	0.81	0.3	1.07	0.22	1.31	0.3	0.83	0.12	0.97	0.15	7.85		1.2633	Dharwar Craton	[8972] Naqvi et al., 2002
B-1	H16	50.7891	14.1518	15.6105	9.72428	6.08406	0.122704	2.3825	0.235182	0.746448	0.15338	2.39	100	47.5972	669.686	46	4478.69	322	87	68	12	1.54	128	30	73	1.85	4.95	0.33	5.36	12.03	1.9	10.01	3.18	1.02	3.87	0.71	4.91	1.05	3.3	0.47	3.34	0.49	39	1.47	0.889831	Dharwar Craton	[13383] Manikyamba and Naqvi, 1997
B-1	SH-33	46.9343	14.2546	14.9601	9.66905	11.1941	0.331985	1.77404	0.238614	0.612097	0.0311236	3.24	100	63.5547	135.892	26.2	3672.58		260	57.6	221	6.97	138	89.9	26.3	0.81	2.13	0.3	2.11	4.1	0.56	3.04	1.19	0.69	1.68	0.3	2.08	0.46	1.23	0.21	1.25	0.18	11.2	0.19	0.972667	Dharwar Craton	[22864] Giri et al., 2019
B-1	H23	49.6815	14.3504	14.1599	10.6568	7.46787	0.0504586	2.78531	0.211926	0.565136	0.070642	0.93	100	55.1388	308.437	33	3390.82	225	193	65	12	1.74	118	36	19	0.58	2.89	0.24	2.91	7.09	1.17	6.61	2.21	0.74	2.59	0.46	3.17	0.66	2.05	0.28	1.88	0.29	26	0.73	0.956912	Dharwar Craton	[13383] Manikyamba and Naqvi, 1997
B-1	N26	48.5698	12.4803	14.3926	11.3644	9.19386	0.0716671	2.73359	0.0266192	1.06477	0.102382	2.42	100	59.8184	447.018	41	6388.61	288	111	66	94	1.4	112	34	60	1.6	4.24	0.21	3.78	10.01	1.71	8.46	2.49	1.1	3.38	0.63	3.72	0.7	2.4	0.34	2.38	0.3	28	0.5	1.08079	Dharwar Craton	[8972] Naqvi et al., 2002
B-1	P24	50.1709	13.2918	12.3668	10.5067	10.1347	2.45325	0.180977	0.201086	0.643475	0.0502715	0.35	100	65.6342	219.495	61	3860.85		569	63	164	4.26	87	55	34	1.17	1.57	0.09	1.84	4.95	0.84	4.25	1.44	0.49	2.06	0.38	2.64	0.57	1.64	0.27	1.66	0.26	14	0.13	0.822146	Dharwar Craton	[8682] Manikyamba et al., 2004
B-1	S40	50.0201	15.2655	12.4598	9.28198	8.52776	0.583266	2.49397	0.241352	1.0358	0.0905068	1.11	100	61.4651	395.171	60	6214.8	369	401	75	153	60	110	50	55	1.84	7.01	0.57	3.64	8.99	1.4	6.99	2.12	0.88	3.09	0.54	3.62	0.82	2.38	0.37	2.44	0.37	20.91	0.33	1.8556	Dharwar Craton	[12642] Manikyamba et al., 2008
B-1	N23	50.115	13.7914	12.0112	10.8011	9.75098	0.180018	2.49025	0.180018	0.630063	0.050005	0.71	100	65.4213	218.332	63.89	3780.38	391	566	64.9	161	4.53	98.37	50.71	29.41	0.85	1.92	0.08	1.9	5.08	0.84	4.16	1.33	0.62	1.95	0.35	2.57	0.63	1.78	0.24	1.65	0.26	19.27	0.13	0.973677	Dharwar Craton	[12271] Naqvi et al., 2008
B-1	P23	50.1102	13.7948	12.0116	10.7994	9.74755	2.49449	0.180325	0.180325	0.631136	0.0500902	0.7	100	65.4126	218.704	63	3786.82	386	558	64	159	4.47	97	50	29	0.84	1.89	0.08	1.87	5.01	0.83	4.1	1.31	0.61	1.92	0.35	2.53	0.62	1.76	0.24	1.63	0.26	19	0.13	0.97384	Dharwar Craton	[8682] Manikyamba et al., 2004
B-1	LAK-241	52.1647	14.8594	12.5025	9.03298	7.03014	2.72102	0.364151	0.182076	1.03176	0.111268	1	100	56.7181	485.82	51	6190.57	395	201	61	132	20.74	154	131	84	2.2	4.83	0.59	5.92	14.71	2.25	10.24	3.14	1.09	3.76	0.69	4.42	0.99	2.6	0.4	2.67	0.42	28	0.62	0.786127	Dharwar Craton	[19260] Manikyamba et al., 2015
B-1	RKY-18	49.2365	11.7707	11.8414	11.5077	12.7819	0.161796	1.69886	0.202245	0.717969	0.080898	1.25	100	71.5552	353.216	41	4307.82	252	1251	100	167	2.96	100	12.07	15.48	0.58	2.43	0.19	3.08	7.44	1.1	5.02	1.42	0.48	1.85		2.17		1.37		1.44	0.21	18.98	0.36	0.760191	Dharwar Craton	[9441] Naqvi et al., 2006
B-1	BCB-24	52.9849	9.33079	14.1266	9.88261	8.36761	1.18391	2.71897	0.441457	0.852814	0.110364	0.58	100	57.9907	481.872	31	5116.89	231	540	56	137	79.6	146	44.1		2.6	12.8	1.2	11	28.6	4.49	19.9	6.02	1.11	7.19	1.37	8.33	1.74	5.31	0.83	5.83	0.84	51.1	2.35	1.1212	Dharwar Craton	[22867] Singh et al., 2019
B-1	H3	47.4842	12.2841	15.5927	10.7029	9.05088	0.0709476	2.89872	0.760153	1.06421	0.0912183	1.8	100	57.4967	398.277	40	6385.28	233	126	86	104	0.67	96	47	23	0.78	3.91	0.41	4.41	10.44	1.49	8.36	2.53	0.98	3	0.58	3.8	0.77	2.67	0.36	2.36	0.35	30	0.87	0.85429	Dharwar Craton	[13383] Manikyamba and Naqvi, 1997
B-1	LAK-244	50.6803	15.3432	11.8095	11.1596	7.40252	2.17303	0.16247	0.182778	0.984972	0.101543	1.66	100	59.3631	443.359	62	5909.83	431	212	70	143	9.6	150	76	85	2.21	4.48	0.41	5.63	14.38	2.2	10.47	3.19	1.16	4.04	0.71	4.65	1.06	2.77	0.44	2.98	0.46	30	0.62	0.76672	Dharwar Craton	[19260] Manikyamba et al., 2015
B-1	P21	51.2777	13.4105	11.9115	11.3682	8.91348	1.96177	0.28169	0.181087	0.643863	0.0503018	0.95	100	63.556	219.628	60	3863.18	352	436	63	148	12.17	122	41	36	1.07	1.69	0.1	1.92	5.19	0.84	4.4	1.47	0.6	2.17	0.4	2.68	0.58	1.69	0.26	1.72	0.25	15	0.13	0.848111	Dharwar Craton	[8682] Manikyamba et al., 2004
B-1	S53	51.9686	14.1575	11.6483	10.2203	7.43574	0.479396	2.83558	0.244798	0.938392	0.0713994	1.06	100	59.802	311.744	65	5630.35	336	386	64	167	47	130	73	52	1.87	2.64	0.19	3.26	8.84	1.43	7.08	2.33	1.12	3.23	0.56	3.9	0.84	2.43	0.36	2.4	0.36	20.75	0.24	0.780285	Dharwar Craton	[12642] Manikyamba et al., 2008
B-1	VB204	49.3859	15.6499	10.5068	13.1736	8.79242	0.0501278	1.65422	0.159406	0.587498	0.0401023	0.83	100	66.1044	175.094	37	3524.99	220	390		170		133	19	31	0.9	2	0.3	2.3	5.5	0.78	3.9	1.3	0.49	1.7	0.3	2.2	0.4	1.2	0.19	1.2	0.2	11	0.1	0.837856	Dharwar Craton	[22276] Dey et al., 2018
B-1	TVK-99	49.3	11.07	15.74	11.16	8.56	0.33	1.98	0.19	1.5	0.17		100	55.8969	742.254	43	9000	391	143		78	8	144	32	102	2.98	4.7	0.29	5.75	16.15	2.69	13.13	4.28	1.47	5.24	0.97	6.64	1.53	4.13	0.64	4.35	0.7	40	0.51	0.787585	Dharwar Craton	[19258] Khanna et al., 2015
B-1	P42	51.4271	13.3132	11.064	14.0898	8.11901	1.04892	0.110943	0.181543	0.595058	0.0504286	0.7	100	63.1019	220.181	58	3570.35	384	539	59	158	3.15	236	15	33	1.07	1.32	0.08	1.63	4.66	0.78	3.85	1.36	0.6	2.01	0.36	2.5	0.53	1.61	0.25	1.59	0.24	14	0.14	0.780285	Dharwar Craton	[8682] Manikyamba et al., 2004
B-1	S63	51.6398	11.4993	12.0391	9.42147	11.4687	0.519454	2.47505	0.193522	0.68242	0.0611122	1.01	100	68.9449	266.828	52	4094.52	255	887	73	217	68	143	75	38	1.28	2.81	0.19	2.22	6.13	0.99	4.73	1.52	0.62	2.32	0.38	2.63	0.55	1.6	0.23	1.64	0.23	13.34	0.27	1.21961	Dharwar Craton	[12642] Manikyamba et al., 2008
B-1	LAK-242	52.313	14.7341	11.1881	10.7194	7.0002	2.51681	0.21398	0.183411	1.01895	0.112085	1.98	100	59.3191	489.384	59	6113.72	423	217	62	139	13.37	181	91	86	2.23	4.8	0.38	5.7	14.93	2.28	10.74	3.22	1.1	3.87	0.7	4.54	0.99	2.58	0.41	2.73	0.4	28	0.61	0.811397	Dharwar Craton	[19260] Manikyamba et al., 2015
B-1	P44	50.8427	14.9579	11.5369	11.6573	7.9053	1.79575	0.361156	0.160514	0.722311	0.0601926	1.1	100	61.4925	262.813	57	4333.87	368	296	58	145	17.8	182	52	43	1.35	1.9	0.12	2.21	6.14	0.99	4.87	1.68	0.68	2.48	0.45	2.99	0.66	2.08	0.31	2.01	0.29	17	0.19	0.828378	Dharwar Craton	[8682] Manikyamba et al., 2004
B-1	P28	52.0755	14.5036	11.2413	10.9989	7.73659	1.717	0.797899	0.1717	0.696899	0.0605999	0.95	100	61.5964	264.591	58	4181.4	276	284	56	128	39.91	143	107	45	1.36	1.86	0.11	2.31	6.22	0.97	4.83	1.69	0.65	2.39	0.44	3	0.66	2.04	0.3	1.9	0.3	17	0.21	0.775833	Dharwar Craton	[8682] Manikyamba et al., 2004
B-1	N32	46.6264	12.8476	15.2098	10.3478	10.4605	0.0512266	2.74574	0.409813	1.18846	0.112698	2.15	100	61.5797	492.064	44	7130.74	247	116	82	108	1.38	136	23	64	1.55	4.63	0.3	4.25	10.6	1.53	8.73	2.49	0.89	3.09	0.61	3.9	0.81	2.44	0.34	2.53	0.34	28	0.49	1.04969	Dharwar Craton	[8972] Naqvi et al., 2002
B-1	S57	53.166	11.2422	11.8673	9.47772	10.1331	0.393224	2.7929	0.191571	0.685622	0.0504134	0.6	100	66.5544	220.115	58	4113.73	270	836	65	126	47	93	72	41	1.37	2.09	0.16	2.53	6.94	1.1	5.17	1.62	0.62	2.39	0.39	2.76	0.56	1.7	0.24	1.7	0.24	14.36	0.31	0.795963	Dharwar Craton	[12642] Manikyamba et al., 2008
B-1	SH-32	47.3581	13.354	15.1496	9.77296	11.001	0.0206398	1.99174	0.206398	1.04231	0.103199	2.84	100	62.8572	450.588	34.4	6253.87	266	266	55.5	224	0.48	133	9.2	47.6	1.41	3.84	0.46	4.38	11.5	1.74	9.18	3.11	0.93	3.15	0.67	4.33	0.93	2.47	0.41	2.63	0.37	24.4	0.34	0.844742	Dharwar Craton	[22864] Giri et al., 2019
B-1	DD16	49.1384	10.72	15.7715	7.03436	12.0064	0.0612571	3.82857	0.347124	1.01074	0.0816762	2.88	100	63.9529	356.614	29	6064.45	195	135	62	96	2.04	51	38	28	0.82	3.62	0.36	4.41	10.79	1.52	7.56	2.48	0.73	3.25	0.59	3.47	0.71	2.12	0.32	1.97	0.28	23	0.76	0.790928	Dharwar Craton	[13383] Manikyamba and Naqvi, 1997
B-1	KAL-13	47.4741	9.72436	14.151	11.5791	14.3662	1.58828	0.317655	0.184445	0.563582	0.0512348	2.3	100	70.2906	223.701	45	3381.49	240	757	60	94	12	78	44	25	0.77	1.51	0.26	1.79	4.83	0.75	4.09	1.27	0.51	1.89	0.37	2.12	0.53	1.6	0.26	1.65	0.22	14	0.17	0.812814	Dharwar Craton	[15496] Manikyamba and Kerrich, 2001
B-1	P31	50.7991	12.9963	11.7198	13.0365	8.75465	1.63836	0.221128	0.180923	0.603076	0.0502563	0.45	100	63.5154	219.429	56	3618.45	372	540	63	169	9.97	139	28	31	1.07	1.68	0.09	1.63	4.62	0.75	3.95	1.33	0.58	1.99	0.33	2.35	0.5	1.63	0.22	1.58	0.24	13	0.24	0.993091	Dharwar Craton	[8682] Manikyamba et al., 2004
B-1	P25	52.2154	12.6093	11.8155	10.8309	9.2334	2.32091	0.170803	0.18085	0.572692	0.0502361	0.8	100	64.5541	219.341	60	3436.15	355	547	61	93	6.02	117	26	38	1.19	1.96	0.1	2.2	5.88	0.9	4.29	1.46	0.54	2.06	0.35	2.44	0.52	1.64	0.24	1.6	0.23	14	0.23	0.858422	Dharwar Craton	[8682] Manikyamba et al., 2004
B-1	TVK-156	47.95	13.63	14.72	11.25	9.61	0.23	1.34	0.18	0.99	0.1		100	60.3407	436.62	44	5940	291	280		148	5	129	42	50	1.42	2.7	0.17	3.43	9.44	1.48	7.19	2.19	0.85	2.91	0.52	3.5	0.77	2.08	0.32	2.18	0.34	22	0.38	0.758467	Dharwar Craton	[19258] Khanna et al., 2015
B-1	YVB4	46.1628	12.4882	16.1137	7.43493	13.7308	0.248521	2.5577	0.300297	0.88018	0.0828404	3.8	100	66.5089	361.698	33	5281.08	276	231	59	82	8.95	154	46	16	0.66	3.56	0.25	3.47	8.62	1.21	5.71	2.19	0.81	2.75	0.42	2.86	0.56	1.62	0.23	1.54	0.27	21	0.39	0.988525	Dharwar Craton	[13383] Manikyamba and Naqvi, 1997
B-1	TVK-138	49.1949	12.6613	16.5517	7.76078	9.71097	0.750075	1.69017	0.230023	1.30013	0.150015		100	57.7581	654.995	43	7800.78	338	186		102	40	124	91	68	1.91	3.9	0.23	4.54	12.62	1.98	9.8	3.17	1.09	4.1	0.75	4.99	1.11	3.01	0.47	3.15	0.48	32	0.43	0.827706	Dharwar Craton	[19258] Khanna et al., 2015
B-1	KAL-8	46.2938	9.304	13.3546	13.2929	15.6472	1.26452	0.061684	0.195333	0.544875	0.0411226	1.82	100	73.1945	179.55	37	3269.25	220	597	60	128	1	106	20	23	0.72	1.32	0.21	1.6	4.55	0.73	3.93	1.4	0.67	1.85	0.36	2.1	0.53	1.54	0.25	1.54	0.21	14	0.16	0.794916	Dharwar Craton	[15496] Manikyamba and Kerrich, 2001
B-1	SH-48	49.0905	12.4812	15.5663	9.80806	7.75801	0.341674	3.14541	0.231133	1.45714	0.120591	0.35	100	53.7356	526.524	44.9	8742.84	330	231	68.3	103	5.5	114	120	34.3	1.14	4.61	0.77	5.41	14.2	2.1	11	3.74	1.07	3.8	0.82	5.37	1.13	3.21	0.51	3.22	0.44	28.6	0.43	0.821052	Dharwar Craton	[22864] Giri et al., 2019
B-1	P36	50.2672	15.0217	11.5939	11.8157	7.94435	2.09699	0.30245	0.161307	0.735961	0.06049	0.8	100	61.4925	264.111	59	4415.77	371	315	59	142	10.39	110	32	44	1.38	1.92	0.12	2.31	6.44	1.01	5.09	1.73	0.66	2.59	0.45	3.15	0.7	2.06	0.31	2.08	0.3	18	0.2	0.80086	Dharwar Craton	[8682] Manikyamba et al., 2004
B-1	P32	53.4293	12.4987	11.3707	9.82979	9.25572	2.66895	0.171216	0.161144	0.564004	0.0503575	0.45	100	65.4817	219.871	56	3384.03		512	60	97	5.82	99	48	32	0.94	1.96	0.1	2.28	5.81	0.83	4.48	1.32	0.49	1.88	0.34	2.38	0.56	1.6	0.25	1.67	0.25	17	0.16	0.828301	Dharwar Craton	[8682] Manikyamba et al., 2004
B-1	P35	47.2884	14.7795	13.6442	10.9883	10.3599	1.37861	0.567663	0.202737	0.73999	0.0506842	0.8	100	63.8926	221.297	68	4439.94		671	78	220	31.91	115	61	37	1.17	1.71	0.11	1.81	5.34	0.88	4.78	1.67	0.59	2.34	0.4	2.77	0.61	1.71	0.27	1.75	0.27	15	0.15	0.9103	Dharwar Craton	[8682] Manikyamba et al., 2004
B-1	P40	49.5321	15.2329	11.9932	11.1681	8.73327	2.04246	0.29178	0.181105	0.754603	0.0704296	0.6	100	62.9223	307.51	58	4527.62	389	329	65	170	10.18	145	28	44	1.51	1.98	0.11	2.17	6.3	1.02	5.19	1.81	0.69	2.62	0.47	3.1	0.69	2.11	0.31	2.06	0.31	18	0.13	0.87917	Dharwar Craton	[8682] Manikyamba et al., 2004
B-1	S38	53.3146	12.0832	11.4202	10.2451	8.77863	0.281237	2.94295	0.170751	0.703094	0.0602652	0.65	100	64.1761	263.13	56	4218.56	345	549	59	94	39	159	30	45	1.45	2.51	0.16	2.88	7.81	1.18	5.6	1.73	0.65	2.34	0.41	2.56	0.56	1.69	0.4	1.65	0.23	14.85	0.31	0.839747	Dharwar Craton	[12642] Manikyamba et al., 2008
B-1	VAV133	51.038	13.9352	12.1296	11.7623	7.70212	0.581484	1.86687	0.191788	0.741648	0.0510074	1.44	100	59.6748	222.708	41	4449.89	284	240		110	12	94	86	41	1.1	2	0.8	2.4	6.6	1.01	5	1.7	0.6	2.3	0.4	2.8	0.6	1.8	0.27	1.8	0.31	15	0.2	0.802945	Dharwar Craton	[22276] Dey et al., 2018
B-1	P22	49.2802	15.0953	12.1655	11.4659	8.79968	1.91606	0.273723	0.182482	0.760341	0.0608273	0.6	100	62.7661	265.584	59	4562.04	380	328	65	171	8.9	141	24	43	1.45	1.75	0.12	2.23	6.32	0.99	5.32	1.74	0.7	2.72	0.47	3.26	0.7	2.2	0.33	2.17	0.32	18	0.13	0.756137	Dharwar Craton	[8682] Manikyamba et al., 2004
B-1	N40	47.8516	12.2854	14.4731	9.56214	12.654	0.204757	1.894	0.204757	0.84974	0.0204757	2.32	100	67.079	89.4008	32	5098.44	219	267	57	23	5.87	119	27	32	0.75	3	0.16	3.69	9.75	1.42	6.52	1.86	0.81	2.87	0.48	3.22	0.66	1.92	0.21	1.97	0.27	21	0.43	0.783361	Dharwar Craton	[8972] Naqvi et al., 2002
B-1	N25	48.1063	12.5782	14.4169	11.5472	10.1141	0.0927897	1.5465	0.360849	1.12379	0.11341	2.12	100	62.0485	495.169	36	6742.72	302	194	79	109	3.11	133	36	62	1.87	4.9	0.32	4.39	11.36	1.62	7.36	2.93	0.84	3.55	0.6	3.38	0.73	2.17	0.43	2.2	0.4	27	0.57	1.07547	Dharwar Craton	[8972] Naqvi et al., 2002
B-1	BCB-09	48.9151	13.5486	13.7986	10.349	9.93901	0.669933	1.77982	0.229977	0.709929	0.059994	0.1	100	62.6676	261.946	34	4259.57		312.13	55.27	214.23	43.35	99.67	49.4	55.45	1.16	3.61	0.29	3.94	9.92	1.37	6.59	1.9	0.57	2.37	0.45	2.83	0.62	1.9	0.29	1.91	0.27	36.55	0.78	0.882832	Dharwar Craton	[22867] Singh et al., 2019
B-1	N31	48.6261	12.3393	14.5104	11.6389	9.80555	0.0205999	1.48319	0.339898	1.14329	0.0926996	2.2	100	61.1629	404.745	37	6859.77	229	105	80	100	1.2	87	17	59	1.55	4.34	0.25	4.41	11.05	1.51	8.48	2.64	0.9	3.22	0.59	3.9	0.84	2.44	0.36	2.32	0.3	27	0.55	0.94824	Dharwar Craton	[8972] Naqvi et al., 2002
B-1	TVK-101	49.9	12.1824	12.8926	12.1424	8.92178	0.45009	2.11042	0.170034	1.11022	0.120024		100	61.7258	524.048	39	6661.33	310	214		108	10	98	40	58	1.79	3.4	0.19	4.15	11.72	1.8	8.48	2.68	1.07	3.44	0.63	4.27	0.96	2.64	0.41	2.73	0.44	26	0.54	0.789402	Dharwar Craton	[19258] Khanna et al., 2015
B-1	KAL-16	45.3778	11.319	15.7124	11.5021	11.319	3.04078	0.447473	0.183057	1.00681	0.0915285	2.1	100	62.6708	399.632	44	6040.88	299	119	55	63	13	123	63	45	1.29	2.79	0.43	3.11	9.09	1.44	7.8	2.51	0.97	3.58	0.67	3.92	0.95	2.81	0.45	2.85	0.4	25	0.32	0.864393	Dharwar Craton	[15496] Manikyamba and Kerrich, 2001
B-1	SH-43	48.0264	13.3258	13.7792	9.68773	11.8108	0.206122	2.2055	0.216428	0.669896	0.0721426	2.6	100	66.6397	314.989	38.5	4019.38	250	373	71.4	245	6.6	235	168	17.8	0.69	3.01	0.44	3.3	9	1.31	7.39	2.36	0.92	2.65	0.49	3.39	0.75	1.99	0.32	1.87	0.25	18.3	0.32	0.87886	Dharwar Craton	[22864] Giri et al., 2019
B-1	SH-39	51.0152	12.4467	12.7513	9.88832	9.1066	0.071066	3.63452	0.22335	0.812183	0.0507614	1.36	100	62.4678	221.634	40.5	4873.1	249	131	60.1	76.3	0.8	143	17.4	24.9	0.76	2.18	0.53	2.53	6.8	0.97	5.24	1.76	0.7	2.29	0.41	2.66	0.56	1.58	0.25	1.57	0.23	14.7	0.24	0.830239	Dharwar Craton	[22864] Giri et al., 2019
B-1	N30	47.3635	12.661	14.7456	11.1438	10.8465	0.102518	1.6813	0.205037	1.1277	0.123022	2.11	100	63.1574	537.139	46	6766.22	257	126	84	108	4.39	102	21	57	1.62	3.89	0.23	4.1	10.68	1.47	8.41	2.38	0.98	3.18	0.61	4.17	0.82	2.44	0.36	2.61	0.34	29	0.53	0.914183	Dharwar Craton	[8972] Naqvi et al., 2002
B-1	VB214	47.5694	15.5393	13.6979	11.7031	7.72363	0.787708	1.64703	0.1913	1.04857	0.0920697	2.19	100	56.7859	401.995	38	6291.43	358	330		140	25	115	104	39	1.3	3	0.3	3.4	10	1.54	7.4	2.6	0.91	3.3	0.7	4.3	0.9	2.6	0.38	2.5	0.39	21		0.850177	Dharwar Craton	[22276] Dey et al., 2018
B-1	SH-50	46.9436	12.875	11.1947	19.3176	6.74157	0.154623	1.69055	0.278322	0.731883	0.0721575	2.77	100	58.3931	315.054	30	4391.3	201	296	51	132	4.48	90.2	19.1	8.37	0.36	2.37	0.16	2.82	7.84	1.13	6	2.06	0.49	2.39	0.44	3.04	0.63	1.74	0.26	1.65	0.23	16.2	0.27	0.809779	Dharwar Craton	[22864] Giri et al., 2019
B-1	RM205	46.918	11.1741	16.924	11.0046	11.7577	0.103551	1.30851	0.197688	0.555409	0.0564823	2.81	100	61.8188	246.613	23.41	3332.46	597	2160	84.34	213	1.49	39.72	19.97	7.22	0.31	1.44	0.11	1.17	3.09	0.42	2.19	0.72	0.27	0.99	0.17	1.19	0.25	0.75	0.12	0.85	0.13	6.58		1.18589	Dharwar Craton	[8972] Naqvi et al., 2002
B-1	N33	47.0734	13.2996	14.2712	9.38614	12.8919	0.152869	1.90576	0.101912	0.713387	0.203825	2.14	100	67.7966	889.94	35	4280.32	232	303	61	24	13.65	115	49	35	0.9	2.74	0.22	2.9	8.6	1.31	6.52	2.07	0.78	2.76	0.48	3.19	0.69	2.13	0.3	2.04	0.25	22	0.36	0.910374	Dharwar Craton	[13383] Manikyamba and Naqvi, 1997
B-1	N36	45.4936	12.8682	15.6564	9.4953	12.9602	0.316851	1.98287	0.224862	0.93011	0.0715469	2.15	100	65.8605	312.388	35	5580.66	232	303	61	24	13.61	115	49	35	0.9	2.74	0.12	2.9	8.6	1.31	6.52	2.07	0.78	2.76	0.47	3.2	0.7	2.22	0.3	2.04	0.25	22	0.36	0.910374	Dharwar Craton	[8972] Naqvi et al., 2002
B-1	N27	48.9915	12.1733	14.4681	11.3501	10.1873	0.113192	1.49207	0.0308705	1.08047	0.113192	2.1	100	62.1348	494.218	43	6482.81	242	113	81	119	5.93	125	29	57	1.54	4.21	0.25	4.1	10.66	1.42	7.81	2.62	0.83	3.34	0.44	3.87	0.82	2.39	0.37	2.21	0.38	28	0.57	0.989385	Dharwar Craton	[8972] Naqvi et al., 2002
B-1	N22	47.0322	12.5728	14.4649	10.7623	10.4605	0.090524	3.20857	0.17099	1.12652	0.11064	1.42	100	62.7608	483.078	39	6759.12	244	111	75	98	0.98	135	46	63	1.71	4.18	0.23	4.1	11.31	1.58	8.31	2.8	1.19	3.48	0.56	3.83	0.76	2.44	0.37	2.37	0.36	29	0.63	0.982335	Dharwar Craton	[8972] Naqvi et al., 2002
B-1	101	52.7782	13.872	12.8048	8.79636	7.38086	0.151661	2.33559	0.171883	1.46606	0.242658	2.08	100	57.3257	1059.49	45	8796.36	365	36	49	62	6	110	13	18	0.83	6	0.32	6.41	16.85	2.21	10.37	3.48	1.22	3.96		4.28		2.7		3.18	0.48	35	0.53	0.901904	Dharwar Craton	[5684] Hanuma et al., 1997
B-1	103	50.4006	14.6823	14.5736	9.98847	6.95426	0.0814554	2.0262	0.193457	1.01819	0.0814554	2.2	100	52.6531	355.651	39	6109.16	274	213	58	121	1	145	22	18	0.55	3	0.17	3.78	9.66	1.22	7.01	2.6	0.89	3.4		3.82		2.08		1.93	0.3	25	0.35	0.76471	Dharwar Craton	[5684] Hanuma et al., 1997
B-1	N44	48.1096	11.508	13.5169	10.3878	13.6263	0.244418	1.74148	0.193497	0.651781	0.0203681	1.63	100	70.1436	88.9313	32	3910.68	218	410	50	22	7.7	151	41	29	0.79	2.83	0.2	3.25	9.38		6.11	1.72	0.78	2.51	0.45	2.94	0.62	1.73	0.25	1.72	0.24	19	0.6	0.839016	Dharwar Craton	[13383] Manikyamba and Naqvi, 1997
B-1	PNK8	49.3846	12.1453	16.0818	8.65629	8.58509	0.325501	2.61418	0.16275	1.8106	0.233954	1.73	100	55.439	1021.49	30	10863.6	286	112	37	48	8	284	142	132	2.9	7.5		9.7	25.28		19.38	5.53	1.8	7.27	1.21	6.78	1.47	4.81	0.77	4.2	0.63	46	1.2	0.745001	Dharwar Craton	[16378] Kerrich and Manikyamba , 2012
B-1	H-60	51.7073	11.0976	12.7541	10.4573	9.88821	0.243902	2.30691	0.182927	1.25	0.111789	1.99	100	64.3727	488.091	43	7500	337	552	52	172	3.8	195	80	32	0.96	4.33	0.52	5.32	13.95		10.79	3.16	1.1	4.43	0.8	4.53	0.93	2.9	0.48	2.47	0.33	29	0.84	0.78423	Dharwar Craton	[13224] Manikyamba et al., 2009
B-1	s_H-60	51.7088	11.0979	12.7516	10.4576	9.88849	0.243909	2.30698	0.182932	1.25004	0.111792	1.99	100	64.3777	488.105	43	7500.21	337	552	52	172	3.8	195	80	32	0.96	4.33	0.52	5.32	13.95		10.79	3.16	1.1	4.43	0.8	4.53	0.93	2.9	0.48	2.47	0.33	29	0.84	0.78423	Dharwar Craton	[13224] Manikyamba et al., 2009
B-1	H-67	51.2393	12.3832	12.373	9.5896	10.707	0.162536	2.20439	0.203169	1.04632	0.0914262	1.98	100	66.8513	399.185	41	6277.94	308	538	56	213	1.66	118	47	33	0.88	3.21	0.41	3.48	9.48		7.88	2.27	0.87	3.38	0.61	3.61	0.77	2.54	0.45	2.32	0.35	25	0.4	0.888777	Dharwar Craton	[13224] Manikyamba et al., 2009
B-1	s_H-67	51.2391	12.3831	12.3735	9.58955	10.707	0.162535	2.20438	0.203168	1.04632	0.0914258	1.98	100	66.8504	399.183	41	6277.9	308	538	56	213	1.66	118	47	33	0.88	3.21	0.41	3.48	9.48		7.88	2.27	0.87	3.38	0.61	3.61	0.77	2.54	0.45	2.32	0.35	25	0.4	0.888777	Dharwar Craton	[13224] Manikyamba et al., 2009
B-1	H-71	51.3646	12.2866	12.8897	10.0992	10.0276	0.102218	2.06481	0.183993	0.879076	0.102218	2.32	100	64.451	446.305	41	5274.46	286	767	55	180	1.03	122	48	49	1.22	3.68	0.41	3.11	8.43		7.15	2.13	0.71	3.16	0.56	3.27	0.7	2.4	0.43	2.23	0.33	23	0.34	1.14013	Dharwar Craton	[13224] Manikyamba et al., 2009
B-1	s_H-71	51.3626	12.2861	12.8932	10.0987	10.0272	0.102214	2.06472	0.183985	0.879041	0.102214	2.32	100	64.4439	446.287	41	5274.24	286	767	55	180	1.03	122	48	49	1.22	3.68	0.41	3.11	8.43		7.15	2.13	0.71	3.16	0.56	3.27	0.7	2.4	0.43	2.23	0.33	23	0.34	1.14013	Dharwar Craton	[13224] Manikyamba et al., 2009
B-1	H-63	51.5373	11.5576	12.7347	9.61948	10.756	0.314561	1.84678	0.192796	1.30898	0.131913	2.01	100	66.3117	575.957	41	7853.88	335	687	46	171	10.48	192	87	22	0.66	4.24	0.52	4.55	12.62		10.57	3.28	1.16	4.47	0.79	4.54	0.92	2.86	0.48	2.32	0.31	29	0.45	0.897887	Dharwar Craton	[13224] Manikyamba et al., 2009
B-1	s_H-63	51.5387	11.5579	12.7322	9.61975	10.7563	0.31457	1.84683	0.192801	1.30902	0.131916	2.01	100	66.3166	575.973	41	7854.1	335	687	46	171	10.48	192	87	22	0.66	4.24	0.52	4.55	12.62		10.57	3.28	1.16	4.47	0.79	4.54	0.92	2.86	0.48	2.32	0.31	29	0.45	0.897887	Dharwar Craton	[13224] Manikyamba et al., 2009
B-1	N43	48.8566	12.4883	15.2422	9.89924	8.99562	0.172602	3.01546	0.223367	1.02546	0.0812245	1.9	100	57.902	354.642	37	6152.76	273	192	60	22	4.02	103	34	65	1.48	3.56	0.18	4.02	11.91		8.04	2.69	0.94	3.29	0.59	3.98	0.84	2.53	0.36	2.53	0.32	27	0.83	0.853279	Dharwar Craton	[8972] Naqvi et al., 2002
B-1	RKY-17	51.2183	10.2517	12.7793	11.8492	11.1414	0.222424	1.59741	0.222424	0.647053	0.0707714	1.25	100	67.0164	309.002	44	3882.32	232	1236	94	148	8.83	66	17.28	14.35	0.62	2.69	0.2	2.4	6.47		4.6	1.35	0.41	1.72		1.82		1.15		1.16	0.17	17.13	0.41	1.07996	Dharwar Craton	[9441] Naqvi et al., 2006
B-1	H29	50.1653	14.1304	14.2623	10.2081	7.15067	0.0100572	3.17808	0.241373	0.583318	0.0704004	1.14	100	53.8839	307.382	38	3499.91	268	152	69	12	0.58	111	67	27	0.81	3.17	0.26	2.84	8.42		6.76	2.46	1.03	3.13	0.56	4	0.81	3.41	0.34	2.5	0.33	29	0.68	1.07549	Dharwar Craton	[13383] Manikyamba and Naqvi, 1997
B-1	H-58	47.1159	11.3666	15.6753	11.3166	10.7668	0.149955	2.01939	0.19994	1.26962	0.119964	0.89	100	61.5493	523.787	46	7617.71	361	617	53	144	1.97	150	51	26	0.71	4.25	0.53	4.61	12.9		10.73	3.25	1.26	4.69	0.79	4.54	0.91	2.84	0.46	2.32	0.32	28	0.71	0.888291	Dharwar Craton	[13224] Manikyamba et al., 2009
B-1	s_H-58	47.1153	11.3664	15.6764	11.3165	10.7666	0.149953	2.01937	0.199937	1.2696	0.119962	0.89	100	61.5474	523.78	46	7617.62	361	617	53	144	1.97	150	51	26	0.71	4.25	0.53	4.61	12.9		10.73	3.25	1.26	4.69	0.79	4.54	0.91	2.84	0.46	2.32	0.32	28	0.71	0.888291	Dharwar Craton	[13224] Manikyamba et al., 2009
B-1	H-70	51.3793	11.6329	12.8702	10.2535	10.6592	0.121704	1.92698	0.182556	0.882353	0.0912779	2.21	100	65.872	398.537	41	5294.12	289	734	47	168	1.17	104	32	35	0.94	3.39	0.36	2.92	8.01		6.64	2.01	0.85	2.95	0.55	3.19	0.69	2.33	0.4	2.21	0.32	22	0.31	1.11862	Dharwar Craton	[13224] Manikyamba et al., 2009
B-1	s_H-70	51.3784	11.6327	12.8717	10.2534	10.659	0.121702	1.92694	0.182553	0.882338	0.0912763	2.21	100	65.869	398.53	41	5294.03	289	734	47	168	1.17	104	32	35	0.94	3.39	0.36	2.92	8.01		6.64	2.01	0.85	2.95	0.55	3.19	0.69	2.33	0.4	2.21	0.32	22	0.31	1.11862	Dharwar Craton	[13224] Manikyamba et al., 2009
B-1	N38	45.872	13.3802	14.6335	10.3453	12.9188	0.235819	1.59947	0.184554	0.809988	0.020506	2.12	100	67.2927	89.5333	34	4859.93	227	304	64	26	7.39	89	40	35	0.92	2.75	0.22	2.67	8.43		6.31	2.15	0.74	2.62	0.47	3.44	0.7	2.02	0.3	2.12	0.29	21	0.35	0.992404	Dharwar Craton	[13383] Manikyamba and Naqvi, 1997
B-1	s_H-68	46.3965	12.3711	15.3136	12.0894	10.621	0.170982	1.76011	0.18104	0.995719	0.100578	0.93	100	61.779	439.142	42	5974.32	316	573	55	170	1.76	152	36	29	0.76	3.55	0.42	3.51	9.81		8.03	2.42	0.88	3.3	0.66	3.8	0.8	2.65	0.45	2.43	0.35	25	0.4	0.974515	Dharwar Craton	[13224] Manikyamba et al., 2009
B-1	s_H-62	47.7511	11.8977	15.3039	9.64435	11.1566	0.160238	2.56382	0.180268	1.23183	0.110164	0.96	100	62.9484	480.998	44	7391	357	586	54	136	2.69	191	85	43	1.15	4.47	0.49	3.8	10.97		9.27	2.82	1.18	4.07	0.79	4.36	0.91	2.86	0.46	2.41	0.32	27	0.42	1.13342	Dharwar Craton	[13224] Manikyamba et al., 2009
B-1	s_H-59	47.9355	10.7151	15.5302	10.5739	11.5929	0.151343	2.07845	0.181612	1.14012	0.100896	1.08	100	63.4992	440.53	41	6840.72	350	572	54	127	2.05	159	42	49	1.18	4.57	0.51	4.43	12.81		10.7	3.25	1.13	4.4	0.81	4.49	0.94	2.9	0.48	2.48	0.35	29	0.45	0.993985	Dharwar Craton	[13224] Manikyamba et al., 2009
B-2	RKY-1	51.9287	12.1865	11.9045	10.3334	10.6557	0.161144	1.84309	0.181287	0.725149	0.0805721	0.75	100	67.5957	351.794	38	4350.89	244	1005	83	155	6.94	225	15.9	17.38	0.56	2.33	0.23	5.83	8.89		5.93	1.47	0.57	1.92		2.52		1.41		1.55	0.2	17.84	0.35	0.385083	Dharwar Craton	[9441] Naqvi et al., 2006
B-2	RKY-22	51.4263	10.7046	11.6017	11.2589	12.2064	0.171354	1.70346	0.211672	0.635017	0.080637	1.25	100	71.0312	352.077	34	3810.1	227	935	89	150	6.26	57	13.37	12.28	0.36	2.16	0.22	3.16	5.81		4.49	1.49	0.43	1.59		2.25		1.15		1.2	0.17	16.26	0.36	0.658618	Dharwar Craton	[9441] Naqvi et al., 2006
B-2	RM-3	49.6639	13.5898	14.4172	10.4975	8.30489	0.13445	1.63409	0.227531	1.44793	0.0827386	3.5	100	57.3099	361.253	37	8687.56	496	159	95	83	1.47	163	17.68	29.51	0.91	4.41	0.22	6.56	12.05		8.88	3.28	1.01	4.26		4.87		2.74		3.19	0.37	45.2	0.41	0.647742	Dharwar Craton	[9441] Naqvi et al., 2006
B-2	RIH-5	53.952	15.0346	10.5755	8.34589	8.3961	0.4419	2.44049	0.160691	0.582505	0.0703023	0.5	100	64.9152	306.954	30	3495.03	291	209	62	89	7.34	178	122.15	47.27	1.24	4.21	0.54	11.22	18.15		9.97	2.17	0.71	2.53		2.41		1.78		1.72	0.29	16.29	2.98	0.36154	Dharwar Craton	[9441] Naqvi et al., 2006
B-2	SIG-236	50	10.5873	14.133	12.1155	9.80823	0.659209	1.70795	0.19976	0.659209	0.129844	0.8	100	61.7934	566.925	26	3955.25	215	1044	71	283	14.8	92	128	31	1.02	3.2	0.23	6.55	13.02		9.24	2.69	0.89	2.96	0.5	3	0.61	1.55	0.23	1.47	0.22	17	0.7	0.470734	Dharwar Craton	[16345] Manikyamba et al., 2012
B-2	LAK-268	52.4714	14.677	12.7868	9.72405	6.67138	2.24401	0.202163	0.171839	0.950167	0.101082	1.72	100	54.8719	441.342	23	5701	142	310	37	113	6.56	423	166	78	1.95	2.78	0.25	23.53	43.97		24.87	4.85	1.36	4.74	0.64	3.36	0.68	1.8	0.27	1.66	0.26	20	3.89	0.113839	Dharwar Craton	[19260] Manikyamba et al., 2015
B-2	RG-21	49.33	8.9	13.18	12.32	13.7	0.17	1.18	0.19	0.95	0.08	2.94	100	70.7811	349.296	66.12	5700	320	1385	61.5	410	6.57	49.61	17.43	15.74	1.01	3.61	0.23	5.26	10.49		8.83	2.79	0.99	3.49	0.59	4.13	0.87	2.03	0.32	2.05	0.3	29.78	0.36	0.661285	Dharwar Craton	[12271] Naqvi et al., 2008
B-2	SIG-233	49.915	10.3452	15.1376	10.9455	10.7554	0.34017	1.5908	0.2001	0.64032	0.130065	0.9	100	62.3471	567.89	26	3841.92	225	1348	81	395	12	155	144	50	1.29	3.5	0.25	6.98	14.13		9.93	2.51	0.89	2.79	0.47	2.75	0.58	1.46	0.23	1.4	0.2	16	0.69	0.483148	Dharwar Craton	[16345] Manikyamba et al., 2012
B-2	RIH-14	49.1742	8.3283	16.1329	9.90937	13.1219	0.745217	1.36959	0.241692	0.906344	0.0704935	0.75	100	65.464	307.788	25	5438.07	175	1100	81	308	22.06	111	144.82	41.97	1.07	4.74	0.37	7.34	16.07		13.36	3.08	1.19	3.16		2.93		1.78		1.6	0.19	16.28	1.81	0.622228	Dharwar Craton	[9441] Naqvi et al., 2006
B-2	114	46.8087	17.0726	11.4582	10.0693	11.7201	0.184569	1.64061	0.164061	0.717768	0.164061	2.91	100	70.4471	716.323	31	4306.61	204	425	76	304	16	113	25	14	0.41	1	0.03	1.69	3.48	0.53	2.5	1.03	0.54	1.36		1.91		1.01		1.07	0.18	14		0.570139	Dharwar Craton	[5684] Hanuma et al., 1997
B-2	LAK-105	51.3942	12.7905	15.4274	9.76965	6.03152	2.87937	0.353607	0.202061	0.969893	0.181855	1.23	100	47.6752	794.014	28	5819.36	229	342	67	319	9.08	389	145	72	1.97	3.02	0.47	10.7	23.51	3.75	16.61	4.23	1.38	4.42	0.7	3.98	0.82	2.19	0.3	2.16	0.33	23	1.94	0.271951	Dharwar Craton	[19260] Manikyamba et al., 2015
B-2	SIG-172	52.0565	12.5806	13.2056	11.4214	7.47984	0.211694	1.78427	0.171371	0.917339	0.171371	1.5	100	56.897	748.239	36	5504.03	262	283	68	238	4.2	200	119	24	0.72	2.4	0.3	3.34	7.94	1.36	6.55	2.18	0.75	2.73	0.53	3.59	0.78	2.09	0.33	2.09	0.31	23	0.48	0.69236	Dharwar Craton	[16345] Manikyamba et al., 2012
B-2	DHR-10-91	53.15	13.33	11.02	9.72	6.9	0.2	3.46	0.11	1.58	0.53	0.75	100	59.3365	2314.08	18.42	9480	354.12	267.96	31.74	57.38	4.12	60.92	13.28	31.15	0.79	2.15	0.31	17.77	39.11	6.2	31.18	8.3	2.51	11.34	1.87	10.35	2.45	7.3	1.22	6.61	1.02	67.76	1.09	0.116578	Dharwar Craton	[19027] Mukherjee et al., 2014
B-2	SIG-240	50.9916	10.9631	12.9462	12.2038	9.37659	0.539001	2.04414	0.172887	0.63053	0.132208	0.8	100	62.7965	577.246	28	3783.18	216	1024	66	260	15.5	84	145	33	1.08	3	0.21	5.72	12.29	1.88	8.79	2.54	0.86	2.84	0.48	2.86	0.6	1.52	0.23	1.46	0.21	16	0.64	0.50535	Dharwar Craton	[16345] Manikyamba et al., 2012
B-2	LAK-274	52.9941	12.5835	13.595	9.40724	7.71799	1.94214	0.606919	0.182076	0.788995	0.182076	1.02	100	56.953	794.978	31	4733.97	214	556	55	262	21.67	562	188	87	2.34	3.07	0.24	25.85	52.27	7.36	28.64	5.59	1.59	5.3	0.73	3.85	0.81	2.14	0.31	2.16	0.34	23	4.72	0.114431	Dharwar Craton	[19260] Manikyamba et al., 2015
B-2	BCB-32	53.6122	13.6482	9.62578	12.9077	8.08485	0.030018	1.22073	0.15009	0.660396	0.060036	0.56	100	66.1868	262.129	38	3962.38	299	510	44	126	0.4	120.5	31.1	51	1.4	1.7	0.1	3.8	8.1	1.2	5.4	1.67	0.7	2.46	0.47	2.92	0.64	1.96	0.28	1.85	0.27	17.3	0.92	0.431055	Dharwar Craton	[22867] Singh et al., 2019
B-2	SIG-237	49.95	10.6836	14.991	11.1033	10.0939	0.39976	1.73896	0.19988	0.69958	0.139916	0.6	100	61.0774	610.901	28	4197.48	238	1013	78	295	12.9	117	104	57	1.55	3.6	0.24	7.27	15.6	2.32	10.64	3.01	1.06	3.33	0.54	3.25	0.67	1.69	0.26	1.59	0.24	19	0.73	0.477128	Dharwar Craton	[16345] Manikyamba et al., 2012
B-2	BCB-07	50.3051	16.9717	7.61643	9.61969	10.7281	2.33882	1.93207	0.142363	0.315233	0.0305064	2.43	100	76.6498	133.197	32	1891.4	170	680	36	99	175.5	226	101	22	0.6	0.8		1.6	3.5	0.53	2.3	0.66	0.28	1.02	0.2	1.29	0.3	0.93	0.14	1	0.15	8.2	0.19	0.481767	Dharwar Craton	[22867] Singh et al., 2019
B-2	SIG-232	50.6187	10.6592	14.8986	10.3347	10.4158	0.314402	1.77485	0.192698	0.659229	0.131846	0.81	100	61.9669	575.665	28	3955.38	216	1184	74	335	9.3	61	99	50	1.31	3.2	0.28	4.96	10.81	1.63	7.61	2.22	0.77	2.55	0.44	2.63	0.54	1.39	0.21	1.3	0.2	15	0.65	0.621635	Dharwar Craton	[16345] Manikyamba et al., 2012
B-2	BCB-27	52.9869	13.6531	10.1426	11.7184	8.48708	0.139623	1.98464	0.169542	0.658223	0.0598384	0.56	100	66.1029	261.266	38	3949.34	301	640	42	131	2.8	122	44.7	50	1.4	1.7	0.1	3.9	8.3	1.21	5.5	1.71	0.67	2.42	0.48	3	0.65	1.9	0.28	1.85	0.27	17.2	0.98	0.420002	Dharwar Craton	[22867] Singh et al., 2019
B-2	RIH-16	52.3267	14.8592	10.2856	10.8648	8.3583	0.669063	1.82744	0.14979	0.569203	0.0898742	0.5	100	65.4435	392.408	31	3415.22	318	211	53	98	18.38	165	128.21	42.85	1.11	4.28	0.47	11.74	19.83	2.29	9.73	1.89	0.74	2.31		2.79		1.78		1.77	0.25	16.94	2.27	0.351271	Dharwar Craton	[9441] Naqvi et al., 2006
B-2	TVK-137	51.73	11.34	12.02	10.47	10.53	0.32	2.53	0.23	0.74	0.09		100	67.1227	392.958	38	4440	258	327		189	9	92	37	57	1.5	2.5	0.18	4.51	9.98	1.5	6.42	1.96	0.7	2.44	0.45	3.09	0.67	1.85	0.29	1.93	0.29	19	0.34	0.53411	Dharwar Craton	[19258] Khanna et al., 2015
B-2	H19	50.6598	14.3521	13.4047	9.86644	7.75435	0.372129	2.80605	0.181036	0.533049	0.0704027	1.1	100	57.4133	307.392	33	3198.29	223	154	54	13	54.13	172	79	18	0.65	2.45	0.2	4.1	9.46	1.48	7.96	2.18	0.95	3.63	0.61	3.83	0.85	4.65	0.36	2.68	0.33	25	0.56	0.575771	Dharwar Craton	[13383] Manikyamba and Naqvi, 1997
B-2	RKY-8	49.1483	11.984	13.1663	11.8938	10.982	0.240481	1.60321	0.190381	0.721443	0.0701403	0.75	100	66.031	306.246	41	4328.66	247	1202	87	178	19.13	72	23.92	16.7	0.38	2.24	0.24	4.43	8.29	1.05	5.81	1.85	0.5	1.99		2.73		1.22		1.3	0.2	18.23	0.4	0.487205	Dharwar Craton	[9441] Naqvi et al., 2006
B-2	BCB-04	51.5322	15.3923	10.9314	10.2482	7.41485	0.663117	2.96393	0.190897	0.612881	0.0502361	0.86	100	61.2523	219.341	37	3677.28	267	350	41	90	31	153.5	83.2	39	1.1	1.5	0.1	2.6	6.2	1	5	1.49	0.64	2.25	0.41	2.6	0.57	1.69	0.25	1.75	0.25	15.5	0.39	0.555885	Dharwar Craton	[22867] Singh et al., 2019
B-2	BCB-03	52.3833	13.395	11.2228	11.0117	8.21601	0.271521	2.69509	0.201126	0.563154	0.0402253	0.7	100	63.0466	175.631	37	3378.92	236	490	47	142	8.9	149.5	56.1	35	1	1.4	0.1	2.3	5.6	0.92	4.4	1.39	0.47	1.94	0.36	2.25	0.5	1.49	0.22	1.47	0.22	13.4	0.36	0.586499	Dharwar Craton	[22867] Singh et al., 2019
B-2	BCB-38	51.9884	14.253	10.296	11.6117	8.66142	0.189375	2.08313	0.169441	0.677763	0.0697698	0.64	100	66.222	304.629	38	4066.58	319	660	42	136	5.6	110	41.7	54	1.5	1.8	0.1	3.9	8.5	1.25	5.7	1.75	0.71	2.64	0.51	3.16	0.69	1.99	0.28	1.9	0.29	18.3	1.01	0.444708	Dharwar Craton	[22867] Singh et al., 2019
B-2	BCB-05	48.278	16.3088	11.6694	10.8894	9.81564	0.395057	1.88412	0.172204	0.536872	0.0506483	1.13	100	66.2195	221.14	23	3221.23	200	170	57	262	25.2	100	21.7	34	1	1.3	0.1	2.4	5.7	0.91	4.3	1.35	0.53	1.84	0.36	2.2	0.47	1.47	0.21	1.46	0.21	13.4	0.36	0.521914	Dharwar Craton	[22867] Singh et al., 2019
B-2	BCB-02	51.4179	14.2196	11.5849	10.9614	7.81376	0.462591	2.67498	0.201126	0.613435	0.0502816	0.76	100	61.1178	219.539	40	3680.61	274	370	45	105	19.2	126.5	67.9	37	1	1.5	0.1	2.6	6.3	1.02	4.9	1.59	0.64	2.17	0.43	2.65	0.57	1.76	0.25	1.69	0.24	15.2	0.4	0.555885	Dharwar Craton	[22867] Singh et al., 2019
B-2	THOLEIITE	51.6148	12.7987	11.9088	11.0289	6.71933	0.269973	3.31967	0.129987	1.90981	0.29997	2.32	100	56.8024	1309.73	38	11458.9	126	109	34	72	7.9	158	64	27	1.41	5.48	0.39	9.65	23	3.66	17.2	5.47	2.13	6.67	1.24	7.93	1.71	4.51	0.7	4.53	0.62	45	1.01	0.547168	Dharwar Craton	[7307] Manikyamba et al., 2005
B-2	BCB-34	52.2709	14.7211	9.0239	12.251	8.42629	0.149402	2.21116	0.159363	0.717131	0.0697211	0.6	100	68.5155	304.416	40	4302.79	320	480	44	133	4.3	126	61	55	1.6	1.9	0.1	3.9	8.8	1.32	5.8	1.83	0.71	2.64	0.49	3.05	0.66	1.96	0.27	1.78	0.25	17.1	1.02	0.469414	Dharwar Craton	[22867] Singh et al., 2019
B-2	BCB-29	52.4894	13.8682	9.92743	11.2377	8.50635	0.181415	2.89256	0.171336	0.665188	0.0604717	0.82	100	66.6321	264.031	38	3991.13	309	520	43	134	5.1	98.4	77.6	51	1.4	1.7	0.1	4	8.5	1.2	5.5	1.66	0.67	2.53	0.49	2.98	0.65	1.96	0.27	1.86	0.26	17.4	0.96	0.409502	Dharwar Craton	[22867] Singh et al., 2019
B-2	SIG-234	50.3629	10.1613	13.3972	11.3508	12.1069	0.342742	1.49194	0.211694	0.46371	0.110887	0.7	100	67.8047	484.155	30	2782.26		2722	78	454	5.6	73	83	42	1.14	2.9	0.21	4.98	11.38	1.72	7.84	2.17	0.82	2.46	0.41	2.46	0.5	1.29	0.2	1.24	0.19	14	0.57	0.561094	Dharwar Craton	[16345] Manikyamba et al., 2012
B-2	LAK-246	50.1113	14.8887	12.9656	11.5688	7.12551	1.89271	0.182186	0.212551	0.951417	0.101215	1.01	100	56.1552	441.923	55	5708.5	392	197	72	163	5.11	174	128	77	2	4.08	0.4	7.02	16	2.41	10.66	3.06	1.05	3.88	0.69	4.46	1.02	2.65	0.43	2.87	0.45	28	0.71	0.560003	Dharwar Craton	[19260] Manikyamba et al., 2015
B-2	BCB-33	51.8489	13.934	10.4256	11.6615	8.93053	0.109638	2.16286	0.179408	0.677763	0.0697698	0.64	100	66.6255	304.629	38	4066.58	312	490	44	127	2.3	105	27.7	51	1.5	1.7	0.1	3.8	8.4	1.22	5.6	1.7	0.6	2.46	0.48	3.03	0.65	1.97	0.29	1.87	0.26	17.9	0.96	0.431055	Dharwar Craton	[22867] Singh et al., 2019
B-2	BCB-26	53.8151	13.2346	9.38413	12.6499	7.74116	0.0907167	2.19736	0.161274	0.655176	0.0705574	1.02	100	65.7824	308.068	36	3931.06	293	550	43	140	3.2	76.7	35.2	50	1.4	1.8	0.1	4	8.7	1.24	5.4	1.63	0.64	2.36	0.47	2.85	0.62	1.83	0.28	1.79	0.26	16.6	1.11	0.43359	Dharwar Craton	[22867] Singh et al., 2019
B-2	BCB-06	49.0733	15.3102	13.0137	9.76027	7.8062	1.63175	2.31668	0.191378	0.825947	0.0705077	1.52	100	58.2975	307.85	32	4955.68	291	230	50	131	93.8	162.5	96	50	1.4	1.8	0.1	2.8	7.2	1.21	5.9	1.92	0.75	2.67	0.52	3.27	0.7	2.12	0.31	2.18	0.32	19.2	0.31	0.619415	Dharwar Craton	[22867] Singh et al., 2019
B-2	BCB-30	52.9547	13.5656	9.59273	11.13	8.60451	0.209623	3.04452	0.159713	0.678778	0.0598922	0.73	100	67.6419	261.501	38	4072.67	313	530	40	130	8.4	88.5	69.2	52	1.5	1.8	0.1	3.6	8.1	1.19	5.3	1.71	0.65	2.52	0.49	3.05	0.64	1.98	0.28	1.9	0.28	17.6	0.99	0.481767	Dharwar Craton	[22867] Singh et al., 2019
B-2	SIG-239	50.3067	10.2765	14.3087	11.2519	10.8497	0.452489	1.67924	0.201106	0.553042	0.120664	1.1	100	63.8613	526.841	34	3318.25	212	1554	78	388	9.8	51	126	44	1.22	3.5	0.25	5.31	12.38	1.88	8.77	2.43	0.84	2.81	0.48	2.86	0.59	1.49	0.23	1.43	0.21	16	0.76	0.635098	Dharwar Craton	[16345] Manikyamba et al., 2012
B-2	RIH-20	53.7152	13.6341	11.0897	8.78865	9.52864	0.486569	1.91586	0.172326	0.598074	0.0709579	1.75	100	66.6938	309.816	30	3588.44	229	313	63	112	13.66	166	94.3	49.65	1.03	4.5	0.45	15.16	24.84	2.65	11.45	3.05	0.81	2.94		2.49		1.58		1.76	0.29	18.11	2.63	0.28601	Dharwar Craton	[9441] Naqvi et al., 2006
B-2	SIG-231	50.4749	10.4891	14.1774	11.5097	10.3476	0.343573	1.68755	0.202102	0.636621	0.131366	0.8	100	62.976	573.571	32	3819.73	236	1210	77	355	7.5	99	116	34	1.07	3	0.24	5.38	12.24	1.81	8.45	2.51	0.86	2.88	0.49	2.93	0.6	1.5	0.22	1.37	0.21	17	0.65	0.537287	Dharwar Craton	[16345] Manikyamba et al., 2012
B-2	LAK-128	50.7001	13.9712	14.3263	11.0897	6.20942	2.30317	0.23336	0.172484	0.842127	0.152192	0.91	100	50.2513	664.498	30	5052.76	210	362	62	232	8.95	381	73	66	1.79	2.63	0.96	19.43	42.67	6.07	25.03	5.42	1.76	5.44	0.8	4.41	0.91	2.36	0.34	2.38	0.36	26	1.9	0.130422	Dharwar Craton	[19260] Manikyamba et al., 2015
B-2	BCB-36	53.3067	13.4564	10.2743	9.50623	9.49626	0.109726	2.98254	0.169576	0.638404	0.0598504	0.61	100	68.2944	261.319	35	3830.42		470	40	122	3.1	62.6	60.2	49	1.4	1.6	0.1	3.6	8	1.15	5.2	1.63	0.66	2.41	0.49	2.94	0.63	1.85	0.28	1.84	0.26	17.6	0.88	0.428237	Dharwar Craton	[22867] Singh et al., 2019
B-2	VB253	50.5411	16.1214	12.969	9.48802	5.4936	0.133489	3.72744	0.183805	1.2394	0.102684	0.63	100	49.6776	448.339	43	7436.39	323	210		50	2	133	53	74	1.9	2	0.3	5.8	13.7	2.09	9.3	3	0.99	3.7	0.7	4.4	1	2.9	0.44	2.9	0.45	23	0.8	0.332253	Dharwar Craton	[22276] Dey et al., 2018
B-2	SIG-44	50.1466	13.4527	10.7517	7.34925	16.8551	0.0732831	0.230318	0.167504	0.879397	0.0942211	4.32	100	78.5106	411.388	19	5276.38	168	2378	86	936				66	1.49	0.84	0.04	3.46	8.51	1.35	6.21	1.91	0.74	2.53	0.5	2.79	0.6	1.78	0.25	1.57	0.24	14	0.52	0.233922	Dharwar Craton	[17629] Manikyamba et al., 2013
B-2	TVK-87	49.12	11.86	16.09	10.53	8.98	0.29	1.63	0.19	1.17	0.14		100	56.5345	611.268	60	7020	440	196		98	6	135	78	89	2.41	4.1	0.25	5.48	13.08	2	10.13	3.39	1.29	4.53	0.87	5.83	1.31	3.57	0.57	3.9	0.6	38	0.43	0.720892	Dharwar Craton	[19258] Khanna et al., 2015
B-2	RKY-12	49.2241	11.3024	13.0243	10.8019	12.5939	0.520573	1.52167	0.220242	0.700771	0.0900991	1	100	69.2636	393.39	36	4204.63	242	1204	84	191	37.4	55	82.8	13.64	0.52	2.35	0.23	4.67	9.27	1.17	6.16	1.4	0.64	1.99		2.45		1.53		1.54	0.22	18.04		0.484862	Dharwar Craton	[9441] Naqvi et al., 2006
B-2	GWL-49	52	13.12	13.7	10.16	7.69	0.54	1.79	0.19	0.75	0.06		100	56.6751	261.972	46	4500	288	166	52	94	35	135	82	49	1.39	2.2		3.19	8.24	1.33	6.3	1.99	0.73	2.43	0.46	3.02	0.67	1.88	0.3	1.99	0.31	19	0.4	0.664506	Dharwar Craton	[18327] Khanna, 2013
B-2	LAK-254	52.0524	15.6879	10.821	11.0851	6.27921	2.63158	0.19305	0.162569	0.985572	0.101605	1.22	100	57.4893	443.629	58	5913.43	407	203	70	127	8.41	148	79	56	1.59	4.55	0.56	6.48	15.71	2.36	10.55	3.15	1.14	3.98	0.71	4.77	1.07	2.82	0.46	2.89	0.45	30	0.6	0.676556	Dharwar Craton	[19260] Manikyamba et al., 2015
B-2	SIG-227	51.2255	12.8397	16.0394	7.99918	8.11199	0.225618	2.16388	0.174341	1.03579	0.184596	1.7	100	54.1002	805.985	41	6214.75	335	85	70	131	3.3	139	62	138	3.75	6.3	0.52	19.06	40.84	5.42	22.45	5.47	1.62	6.09	1.03	6.4	1.39	3.64	0.56	3.65	0.56	38	2.68	0.318482	Dharwar Craton	[16345] Manikyamba et al., 2012
B-2	BCB-21	53.91	14.0718	10.6626	9.75215	7.93121	0.981285	1.72989	0.212443	0.677795	0.0708144	1.35	100	63.4169	309.189	41	4066.77	315	150	75	65	47.8	88.7	98.2	57	1.6	2.3	0.2	5.6	11.6	1.48	6.3	1.73	0.66	2.64	0.51	3.3	0.74	2.27	0.34	2.26	0.33	19.8	1.5	0.395737	Dharwar Craton	[22867] Singh et al., 2019
B-2	LAK-258	52.4662	13.6784	10.658	12.6818	7.12906	1.84074	0.294925	0.183057	0.955965	0.111868	1.03	100	60.92	488.439	45	5735.79	328	162	54	108	13.87	170	127	34	1.05	3.49	0.32	5.58	13.83	2.1	9.48	2.7	0.99	3.37	0.6	3.94	0.88	2.4	0.38	2.66	0.4	24	0.71	0.602641	Dharwar Craton	[19260] Manikyamba et al., 2015
B-2	LAK-248	50.2234	14.8457	12.896	11.3119	7.01665	2.25426	0.203087	0.192933	0.954509	0.101543	1.62	100	55.9085	443.359	53	5727.05	382	188	64	126	4.97	171	109	55	1.62	4.02	0.44	5.62	13.97	2.12	10.05	3.11	0.93	3.76	0.68	4.43	1.02	2.65	0.42	2.73	0.44	29	0.55	0.689219	Dharwar Craton	[19260] Manikyamba et al., 2015
B-2	BCB-40	53.5528	13.6109	9.75781	10.9888	8.22658	0.110088	2.85228	0.160128	0.680544	0.060048		100	66.2708	262.182		4083.27	369.33	462.55	38	95.2	4.9	96.07	96.71	54.95	1.41	1.9	0.11	3.86	8.16	1.05	5.33	1.66	0.61	2.31	0.44	2.93	0.63	1.91	0.28	1.74	0.26	25.28	1.19	0.474279	Dharwar Craton	[22867] Singh et al., 2019
B-2	VB273	50.9424	13.8738	15.1481	9.25945	5.39535	1.36682	1.93205	0.216842	1.64944	0.215814	1.66	100	45.3571	942.287	40	9896.61	386	90		50	34	225	401	115	3	5	0.4	17.7	37.8	4.91	20.1	5.1	1.46	5	0.8	5.1	1	3.1	0.45	2.9	0.45	25	2.5	0.272185	Dharwar Craton	[22276] Dey et al., 2018
B-2	106	50.0678	8.79749	13.0607	12.2324	13.3603	0.153802	1.06636	0.184563	1.00484	0.0717744	2.76	100	70.4488	313.381	59	6029.05	282	1308	58	361	6	48	14	15	0.75	2	0.17	4.42	10.2	1.43	6.57	2.2	0.89	3.12		3.5		1.91		1.86	0.25	25	0.29	0.435988	Dharwar Craton	[5684] Hanuma et al., 1997
B-2	BCB-28	52.5824	13.746	9.77693	11.254	8.76206	0.0904341	2.91399	0.160772	0.653135	0.0602894	0.64	100	67.6227	263.235	37	3918.81	315	510	42	133	1.7	133.5	69.4	51	1.4	1.8	0.1	3.4	8	1.14	5.3	1.67	1.11	2.45	0.48	3	0.64	1.88	0.28	1.83	0.26	17.3	0.96	0.510106	Dharwar Craton	[22867] Singh et al., 2019
B-2	TVK-67	49.2051	12.0088	15.7684	9.40906	9.70903	0.879912	1.65983	0.189981	1.05989	0.109989		100	58.9314	480.234	37	6359.36	308	162		113	34	86	145	51	1.38	2.6	0.19	3.5	9.03	1.41	6.91	2.26	0.98	2.98	0.57	3.75	0.84	2.34	0.36	2.45	0.38	25	0.29	0.715768	Dharwar Craton	[19258] Khanna et al., 2015
B-2	OWL-26	52.25	13.09	14.25	10.38	6.36	0.3	2.2	0.15	0.89	0.13		100	50.9837	567.606	36	5340	338	137	55	138	12	144	36	56	1.58	3.3		4.3	10.96	1.69	8.17	2.6	0.97	3.23	0.62	4.13	0.91	2.44	0.4	2.59	0.4	28	0.38	0.739457	Dharwar Craton	[18327] Khanna, 2013
B-2	LAK-237	52.3704	14.615	10.6392	11.7363	6.63312	1.72119	0.161047	0.171112	0.94615	1.00654	1.05	100	59.2333	4394.76	49	5676.9	348	269	59	124	3.93	142	137	42	1.25	3.86	0.28	5.67	13.93	2.07	9.59	2.81	0.92	3.42	0.65	4.12	0.92	2.54	0.4	2.82	0.43	26	0.76	0.655951	Dharwar Craton	[19260] Manikyamba et al., 2015
B-2	TVK-74	50.3	12.28	15.78	8.61	9.58	0.83	1.23	0.17	1.1	0.12		100	58.5894	523.944	39	6600	322	165		118	30	113	112	79	2.04	3.3	0.2	4.59	11.53	1.75	8.67	2.69	0.96	3.52	0.67	4.39	0.99	2.66	0.42	2.82	0.44	28	0.48	0.692737	Dharwar Craton	[19258] Khanna et al., 2015
B-2	LAK-238	51.779	14.1605	13.8036	10.9593	6.32073	1.48843	0.163116	0.17331	1.05006	0.101947	2.22	100	51.624	445.122	57	6300.34	406	203	69	145	5.7	188	101	84	2.31	4.44	0.34	7.01	16.91	2.46	11.12	3.21	1.27	4.07	0.73	4.7	1.04	2.76	0.45	2.87	0.44	29	0.69	0.610284	Dharwar Craton	[19260] Manikyamba et al., 2015
B-2	VB225	50.2645	14.3252	13.0229	11.4683	6.76385	0.191811	2.55411	0.191811	1.13673	0.0807624	0.79	100	54.7596	352.625	50	6820.38	331	150		70	6	125	25	64	1.7	3	0.5	5	12.2	1.79	8	2.7	0.99	3.3	0.6	4.1	0.9	2.5	0.37	2.5	0.39	19	0.6	0.578121	Dharwar Craton	[22276] Dey et al., 2018
B-2	TVK-77	49.68	12.05	15.67	9.78	9.33	0.7	1.44	0.18	1.07	0.1		100	58.1168	436.62	38	6420	316	175		122	20	103	141	56	1.17	2.2	0.15	2.91	7.72	1.23	6.16	2.03	0.81	2.62	0.5	3.43	0.75	2.06	0.32	2.19	0.33	22	0.24	0.728445	Dharwar Craton	[19258] Khanna et al., 2015
B-2	LAK-14	52.1708	12.6274	16.0518	9.85528	5.59519	1.80391	0.336323	0.173257	1.16184	0.224215	1.32	100	44.8229	978.968	35	6971.06	280	345	76	245	19.51	473	200	110	2.88	4.65	0.31	24.48	56.7	7.86	32.84	7.17	1.96	7.46	1.07	5.88	1.2	3.08	0.48	3.02	0.45	35	3.1	0.183024	Dharwar Craton	[19260] Manikyamba et al., 2015
B-2	LAK-255	50.8493	12.5784	14.8433	11.0212	7.60364	1.56724	0.364004	0.212336	0.869565	0.091001	1.32	100	54.4175	397.328	48	5217.39	376	207	59	108	3.76	150	120	60	1.76	3.79	0.36	5.08	13.16	2.04	9.67	2.88	1.14	3.54	0.66	4.16	0.95	2.57	0.39	2.66	0.41	25	0.67	0.718857	Dharwar Craton	[19260] Manikyamba et al., 2015
B-2	H12	48.8893	14.6261	15.2619	9.97098	7.71455	0.0813128	2.55119	0.22361	0.630174	0.0508205	1.42	100	54.0866	221.892	49	3781.04	323	178	79	13	3.66	106	46	32	0.93	3.35	0.31	4.73	11.32	1.62	8.29	2.57	1.01	3.35	0.56	3.35	0.85	2.7	0.38	2.63	0.38	32	0.7	0.682419	Dharwar Craton	[13383] Manikyamba and Naqvi, 1997
B-2	TVK-157	48.6451	13.0087	14.4886	11.2789	9.25907	0.209979	1.86981	0.19998	0.949905	0.089991		100	59.8286	392.918	41	5699.43	267	259		142	2	110	88	47	1.3	2.6	0.15	3.52	8.99	1.37	6.73	2.13	0.8	2.71	0.49	3.22	0.71	1.98	0.31	2.05	0.31	21	0.35	0.711702	Dharwar Craton	[19258] Khanna et al., 2015
B-2	BCB-31	52.2795	15.1901	9.84471	10.651	7.78419	0.0895879	3.18535	0.179176	0.716703	0.0796337	0.58	100	64.8224	347.696	42	4300.22	343	190	41	72	1.9	93.6	38.6	60	1.6	2.3	0.1	4.2	9.9	1.39	6.1	1.66	0.58	2.65	0.54	3.4	0.78	2.46	0.36	2.5	0.35	21.2	1.28	0.52765	Dharwar Craton	[22867] Singh et al., 2019
B-2	VB201	50.267	15.2094	13.5461	10.7808	6.82317	0.15029	1.87362	0.187362	1.07207	0.090174	0.98	100	53.9991	393.718	41	6432.41	318	180		130	3	118	31	68	1.8	4	0.5	6.6	14.5	1.89	8.8	2.6	0.98	3.1	0.6	4	0.9	2.5	0.38	2.4	0.4	20	0.8	0.58396	Dharwar Craton	[22276] Dey et al., 2018
B-2	VB205	48.6225	15.643	14.5652	9.5459	7.06191	0.431105	2.83298	0.180654	1.01412	0.102644	1.3	100	53.0503	448.164	35	6084.74	278	180		150	12	110	78	58	1.6	3	0.5	4.4	10.8	1.57	8.2	2.5	0.85	3.2	0.6	3.9	0.8	2.3	0.35	2.3	0.35	19	0.5	0.656955	Dharwar Craton	[22276] Dey et al., 2018
B-2	TVK-70	50.005	12.3612	14.8615	9.39094	9.58096	1.48015	1.0101	0.190019	1.0001	0.120012		100	60.0389	523.996	41	6000.6	311	193		128	43	131	333	64	1.78	2.7	0.17	3.64	9.57	1.49	7.45	2.4	0.99	3.22	0.59	3.97	0.87	2.4	0.38	2.56	0.4	25	0.4	0.71471	Dharwar Craton	[19258] Khanna et al., 2015
B-2	LAK-11	52.4477	13.7213	13.6807	9.02905	6.72354	2.03128	1.08674	0.192972	0.93439	0.152346	1.78	100	53.3876	665.173	29	5606.34	232	326	54	183	101.97	364	301	81	2.21	4	0.33	13.06	31.23	4.42	18.81	4.46	1.47	4.61	0.7	3.97	0.83	2.15	0.31	2.16	0.33	23	2.09	0.29511	Dharwar Craton	[19260] Manikyamba et al., 2015
B-2	BCB-39	52.166	13.2978	10.9257	10.3427	9.41803	0.100513	2.8043	0.170871	0.703588	0.0703588		100	66.7653	307.201		4221.53		373.73	36.53	99.46	3.5	62.84	46.49	56.16	1.46	1.95	0.11	3.46	7.69	1.01	4.89	1.55	0.59	2.26	0.44	2.88	0.63	1.9	0.27	1.7	0.25	22.08	1.18	0.543032	Dharwar Craton	[22867] Singh et al., 2019
B-2	P33	51.2896	13.5633	11.2875	11.8742	8.96126	2.02286	0.131486	0.171943	0.647315	0.0505715	1.1	100	64.9147	220.805	60	3883.89	391	527	62	153	3.76	115	24	34	1.1	1.33	0.09	1.78	4.85	0.78	4.14	1.45	0.54	1.98	0.36	2.55	0.55	1.66	0.24	1.58	0.24	14	0.14	0.719944	Dharwar Craton	[8682] Manikyamba et al., 2004
B-2	BCB-13	48.5547	14.9045	12.7055	10.6878	10.4079	0.221508	1.69253	0.188282	0.58297	0.0543703	0.68	100	65.6246	237.391	25.82	3497.82	182.36	286	64.48	316	9.95	68.26	78	34.52	1.18	1.3	0.13	2.4	5.75	0.81	4.15	1.29	0.51	1.65	0.34	2.24	0.46	1.43	0.21	1.41	0.22	11.86	0.47	0.521914	Dharwar Craton	[22867] Singh et al., 2019
B-2	LAK-245	51.8897	15.0768	10.7922	11.7421	6.96241	2.13217	0.181892	0.191997	0.929669	0.101051	0.89	100	60.0556	441.208	56	5578.01	402	233	68	156	7.51	170	70	46	1.42	4.45	0.33	6.2	15.68	2.33	10.5	3.14	1.18	3.88	0.68	4.53	1	2.64	0.43	2.7	0.41	28	0.59	0.691569	Dharwar Craton	[19260] Manikyamba et al., 2015
B-2	GWL-24	51.8552	13.0813	14.2014	10.6411	6.70067	0.320032	2.0102	0.160016	0.920092	0.110011		100	52.3719	480.33	32	5520.55	354	151	59	159	12	139	38	48	1.36	3		4.03	10.8	1.7	8.23	2.65	0.92	3.34	0.63	4.24	0.94	2.48	0.4	2.55	0.4	28	0.32	0.717271	Dharwar Craton	[18327] Khanna, 2013
B-2	BCB-08	48.1527	14.61	13.6376	10.4467	10.1909	0.455558	1.60549	0.197676	0.651227	0.0521785	0.4	100	63.5235	227.821	40	3907.36	244.65	128.37	51.05	232.81	24.54	95.56	58.44	37.89	0.96	1.81	0.1	2.55	6.04	0.84	4.19	1.36	0.59	1.77	0.35	2.24	0.48	1.54	0.24	1.51	0.22	17.65	0.48	0.68392	Dharwar Craton	[22867] Singh et al., 2019
B-2	BCB-41	51.7554	12.5274	10.393	13.1059	9.13625	0.359066	1.82525	0.189507	0.648314	0.0598444		100	67.1991	261.292		3889.89		403.48	37.8	95.35	19.33	80.13	86.85	52.74	1.27	2.25	0.11	3.39	7.46	0.96	4.89	1.56	0.52	2.11	0.42	2.82	0.61	1.86	0.28	1.7	0.25	24.84	1.1	0.639514	Dharwar Craton	[22867] Singh et al., 2019
B-2	BCB-11	48.5234	14.539	13.0078	10.4585	10.5617	0.486793	1.56563	0.186216	0.60925	0.0617346	1.19	100	65.4248	269.546	26.93	3655.5	189.2	216	62.58	325	29.96	74.75	67	37.33	1.19	1.55	0.16	2.69	6.58	0.94	4.94	1.5	0.59	1.93	0.37	2.64	0.53	1.64	0.25	1.69	0.24	13.83	0.53	0.555196	Dharwar Craton	[22867] Singh et al., 2019
B-2	G-32	51.0602	14.0028	12.1424	11.1922	7.56151	0.090018	2.82056	0.140028	0.90018	0.090018		100	59.205	393.036	24	5401.08	232	199	53	129	7	226	54	48	1.42	2.9		4.19	11.11	1.72	8.14	2.63	0.92	3.17	0.59	3.83	0.84	2.31	0.37	2.41	0.38	23	0.53	0.666885	Dharwar Craton	[18327] Khanna, 2013
B-2	SIG-226	50.5424	12.6229	16.9928	8.14154	8.25307	0.243334	2.0075	0.1825	0.841529	0.172361	2.1	100	53.093	752.564	41	5049.17	324	145	71	136	3.7	136	53	109	2.91	5.2	0.34	12.74	29.14	3.89	16.05	4.36	1.24	4.92	0.87	5.65	1.21	3.13	0.49	3.19	0.48	33	2.1	0.393279	Dharwar Craton	[16345] Manikyamba et al., 2012
B-2	LAK-239	52.7803	15.4168	10.3051	12.0396	5.72391	2.23447	0.183655	0.183655	1.03051	0.10203	2.41	100	56.4169	445.485	59	6183.04	418	209	65	166	10	158	128	44	1.4	4.45	0.47	5.91	15.16	2.26	10.65	3.27	1.06	3.99	0.73	4.74	1.06	2.81	0.43	2.89	0.45	30	0.6	0.725504	Dharwar Craton	[19260] Manikyamba et al., 2015
B-2	VB243	51.0945	12.8992	15.8729	10.0863	5.69615	0.431983	2.22019	0.212978	1.36527	0.120553	0.86	100	45.5434	526.36	40	8191.6	423	100		90	7	101	52	84	2.3	4	0.9	6	15.5	2.32	11.3	3.7	1.27	4.7	0.9	6.1	1.3	3.7	0.56	3.7	0.61	30	0.4	0.642356	Dharwar Craton	[22276] Dey et al., 2018
B-2	TVK-72	49.1349	12.5913	15.8016	9.32093	9.34093	1.17012	1.27013	0.190019	1.07011	0.110011		100	57.9417	480.33	37	6420.64	310	155		122	54	117	206	63	1.7	2.6	0.19	3.49	9.22	1.41	7.09	2.37	1.03	3.08	0.58	3.95	0.86	2.35	0.35	2.46	0.37	26	0.25	0.717819	Dharwar Craton	[19258] Khanna et al., 2015
B-2	TVK-155	49.42	14.61	12.22	11.05	7.26	0.36	3.67	0.23	1.08	0.1		100	58.0637	436.62	46	6480	310	215		147	8	157	152	48	1.18	2.9	0.17	4.25	11.04	1.66	7.99	2.4	0.88	3.14	0.56	3.7	0.83	2.26	0.34	2.31	0.35	24	0.39	0.657471	Dharwar Craton	[19258] Khanna et al., 2015
B-2	TVK-81	48.7351	11.9488	16.7083	9.959	9.09909	0.269973	1.80982	0.19998	1.14989	0.119988		100	55.9307	523.891	39	6899.31	333	183		122	4	100	66	62	1.63	2.7	0.16	3.74	10.11	1.58	7.7	2.57	0.91	3.3	0.62	4.22	0.92	2.59	0.4	2.73	0.41	27	0.3	0.6956	Dharwar Craton	[19258] Khanna et al., 2015
B-2	TVK-83	49.26	12.13	16.06	9.4	9.47	0.67	1.62	0.19	1.08	0.12		100	57.8807	523.944	39	6480	329	197		134	36	116	134	58	1.56	2.7	0.16	3.58	9.67	1.51	7.47	2.42	0.88	3.23	0.61	4.06	0.9	2.51	0.39	2.66	0.4	26	0.3	0.726688	Dharwar Craton	[19258] Khanna et al., 2015
B-2	VB288	50.4054	10.8107	13.0612	8.8582	14.0888	0.164421	1.45924	0.19525	0.874516	0.0822106	3.16	100	71.5413	358.948	31	5247.09	229	1250		380	2	80	49	66	1.6	4	0.3	7.1	17.1	2.38	9.8	2.8	0.79	2.9	0.5	3.1	0.6	1.9	0.28	1.8	0.28	15	1.1	0.542836	Dharwar Craton	[22276] Dey et al., 2018
B-2	TVK-73	49.3149	11.8812	16.4016	9.53095	9.28093	0.760076	1.41014	0.190019	1.11011	0.120012		100	56.8728	523.996	43	6660.67	358	163		119	31	114	135	60	1.71	2.7	0.15	3.6	9.74	1.52	7.6	2.54	0.96	3.3	0.62	4.17	0.92	2.54	0.4	2.73	0.42	27	0.28	0.722651	Dharwar Craton	[19258] Khanna et al., 2015
B-2	BCB-43	53.2303	14.3459	10.8447	10.7845	7.5943	0.19061	1.99639	0.19061	0.742376	0.0802568		100	62.006	350.417		4454.25	377.81	186.77	40.17	50.62	8.12	103.35	37.2	72.11	1.85	2.59	0.18	5.92	12.66	1.56	7.41	2.22	0.74	2.94	0.57	3.83	0.83	2.61	0.39	2.52	0.38	33.5	1.97	0.421546	Dharwar Craton	[22867] Singh et al., 2019
B-2	SH-46	48.8285	5.57463	14.391	13.775	15.4211	0.262573	0.727126	0.262573	0.706928	0.0504948	0.64	100	71.4066	220.47	51	4241.57	267	696	82.4	391	2.81	50.3	9.76	7.98	0.45	1.51	0.11	2.23	6.15	0.97	5.69	2.09	0.72	2.48	0.47	2.93	0.63	1.55	0.23	1.35	0.19	14.4	0.21	0.652438	Dharwar Craton	[22864] Giri et al., 2019
B-2	LAK-275	52.3766	12.5809	14.4013	8.65696	8.42435	1.43608	1.03155	0.192152	0.748382	0.151699	1.07	100	57.6859	662.348	32	4490.29	206	463	55	177	48.4	394	341	79	2.06	2.89	0.23	18.65	42.55	5.55	21.88	4.92	1.51	4.7	0.67	3.8	0.79	2.01	0.29	2.03	0.32	21	4.11	0.149309	Dharwar Craton	[19260] Manikyamba et al., 2015
B-2	H21	52.7285	14.419	14.0007	7.12874	6.18969	0.313018	4.26109	0.222142	0.595745	0.141363	1.14	100	50.7465	617.22	32	3574.47	233	96	61	10	12.31	157	103	84	1.65	7.77	0.39	13.58	29.78	3.72	16	3.84	1.06	3.92	0.66	4.14	0.88	2.51	0.36	2.5	0.28	34	3.12	0.551301	Dharwar Craton	[13383] Manikyamba and Naqvi, 1997
B-2	DD13	47.6437	11.4894	16.3441	6.4507	13.003	0.0203172	3.52503	0.386026	1.05649	0.0812686	1.94	100	64.9626	354.835	33	6338.95	237	145	63	91	1.82	55	35	28	0.99	3.92	0.35	5.99	14.32	1.95	10.36	3.11	0.94	3.75	0.67	4.13	0.85	2.35	0.37	2.24	0.31	28	0.89	0.63056	Dharwar Craton	[13383] Manikyamba and Naqvi, 1997
B-2	BCB-42	52.1421	14.7347	9.40941	12.1722	8.04805	0.31031	2.22222	0.16016	0.730731	0.0700701		100	66.5923	305.94		4384.38	399.61	413.87	38.17	100.54	16.81	126.46	71.07	58	1.38	2.17	0.11	3.49	7.61	0.94	4.73	1.59	0.66	2.21	0.43	2.81	0.59	1.79	0.27	1.7	0.25	27.19	1.12	0.599103	Dharwar Craton	[22867] Singh et al., 2019
B-2	RIH-10	53.1429	14.6234	9.122	10.9424	8.3677	0.673841	2.3333	0.140803	0.56321	0.0905159	1	100	68.1304	395.21	34	3379.26	310	251	56	109	19.91	206	97.75	39.26	1.1	4.68	0.56	14.3	27.17	2.92	12.78	2.39	0.8	2.75		3.32		1.97		1.85	0.35	18.36	2.84	0.315339	Dharwar Craton	[9441] Naqvi et al., 2006
B-2	KAL-11	45.5688	9.52185	13.1286	12.8813	15.7461	2.03009	0.329761	0.195796	0.546167	0.0515251	3.02	100	73.6505	224.969	13	3277	99	126	18	48	22	158	239	88	2.1	3.49	0.52	10.81	23.68	2.93	12.8	2.6	0.8	2.7	0.4	1.99	0.44	1.25	0.2	1.31	0.18	12	2.02	0.311076	Dharwar Craton	[15496] Manikyamba and Kerrich, 2001
B-2	H20	53.4467	14.247	14.3351	6.56541	6.29143	0.426194	3.75456	0.202949	0.618995	0.111622	1.89	100	50.564	487.364	36	3713.97	242	99	63	10	17.33	149	114	76	1.56	6.91	0.54	14.47	31.61	3.9	18.29	4.01	1.4	5.11	0.76	4.65	1.05	3.03	0.47	2.43	0.37	35	2.88	0.460126	Dharwar Craton	[13383] Manikyamba and Naqvi, 1997
B-2	VAV131	50.1673	13.5596	15.9878	9.99878	5.83602	0.734604	1.98955	0.219361	1.38452	0.122434	1.74	100	45.9664	534.571	41	8307.15	414	100		70	39	124	76	72	1.9	3	0.6	5.6	13.7	1.89	9	2.6	1.01	3.7	0.7	4.5	0.9	2.8	0.44	3.1	0.5	26	0.7	0.516179	Dharwar Craton	[22276] Dey et al., 2018
B-2	P41	50.9539	14.5352	11.5777	11.1941	8.44857	2.08943	0.262441	0.161502	0.716665	0.0605632	1.05	100	62.9717	264.431	58	4299.99	361	340	60	144	8.98	118	28	43	1.32	1.71	0.11	2.22	6.15	0.96	5.04	1.7	0.66	2.48	0.42	3.04	0.66	2.03	0.3	1.9	0.31	17	0.21	0.742182	Dharwar Craton	[8682] Manikyamba et al., 2004
B-2	LAK-271	49.0681	15.4904	14.8895	8.73816	8.1271	1.89429	0.600876	0.183318	0.835116	0.173134	1.52	100	55.9869	755.936	31	5010.69	213	598	59	259	26.53	541	401	89	2.34	3.09	0.24	11.58	27.88	3.78	16.15	3.76	1.22	3.91	0.59	3.48	0.73	1.94	0.28	1.94	0.3	20	4.73	0.257109	Dharwar Craton	[19260] Manikyamba et al., 2015
B-2	TVK-100	49.61	11.31	14.72	10.54	9.45	1.01	1.76	0.18	1.29	0.13		100	59.9382	567.606	40	7740	328	177		106	46	95	133	77	2.23	3.5	0.2	4.85	12.96	1.95	9.31	2.95	0.95	3.66	0.67	4.67	1.06	2.82	0.43	2.91	0.47	27	0.53	0.695334	Dharwar Craton	[19258] Khanna et al., 2015
B-2	SH-44	51.6591	11.3974	11.9229	9.06843	12.9637	0.309151	1.89613	0.195796	0.525556	0.0618302	2.88	100	71.703	269.963	10.8	3153.34	165	573	52.1	245	9.7	73	35.4	9.57	0.4	1.38	0.27	3.13	7.12	0.91	4.63	1.59	0.41	1.54	0.31	2.11	0.46	1.25	0.19	1.14	0.17	11.1	0.32	0.424817	Dharwar Craton	[22864] Giri et al., 2019
B-2	7	53.6287	13.6266	14.3819	7.7779	6.04267	0.877821	2.47015	0.18373	0.908442	0.102072	2.6	100	49.474	445.667	39	5450.65	254	146	54	91	31	137	179	63	1.57	4	0.3	16.02	31.57	3.49	13.41	3.25	1.27	4.5		4.45		2.66		2.99	0.39	30	2.08	0.240583	Dharwar Craton	[5684] Hanuma et al., 1997
B-2	SH-47	49.3838	6.65657	14.5051	12.6869	13.8586	0.464646	1.27273	0.222222	0.868687	0.0808081	0.42	100	69.0079	352.824	39.9	5212.12	257	1092	84.7	355	4.52	79.7	41.8	17.8	0.76	2.15	0.55	2.94	8	1.22	7.09	2.67	0.86	2.79	0.56	3.41	0.7	1.73	0.27	1.6	0.22	16.6	0.35	0.704625	Dharwar Craton	[22864] Giri et al., 2019
B-2	DD2	47.5794	11.4587	16.259	9.09141	11.2648	0.11224	2.66314	0.428551	1.05097	0.0918325	1.96	100	61.7539	400.959	34	6305.83	247	228	69	87	2.93	121	47	33	1.04	4.27	0.43	5.62	13.4	1.79	8.77	3.35	1.11	3.97	0.67		0.8	2.53	0.33	2.15	0.32	26	1.12	0.73208	Dharwar Craton	[13383] Manikyamba and Naqvi, 1997
B-2	RIH-15	53.2798	14.0923	10.9228	9.4985	9.00702	0.341023	2.03611	0.160481	0.571715	0.0902708	0.5	100	65.774	394.14	32	3430.29	279	257	51	103	14.03	215	79.53	45.35	1.22	5.11	0.41	9.87	21.38	2.59	11.01	2.36	0.75	2.58		2.48		1.54		1.98	0.22	17.4	2.82	0.498851	Dharwar Craton	[9441] Naqvi et al., 2006
B-2	LAK-266	53.637	12.6205	13.6045	9.23202	7.08126	2.02901	0.63914	0.172466	0.801461	0.182611	1.58	100	54.8133	797.317	43	4808.77	301	277	51	123	21.35	256	116	84	2.27	3.99	0.3	8.38	19.56	2.54	10.46	2.66	0.92	2.96	0.49	3	0.64	1.79	0.28	1.93	0.32	18	1.94	0.458771	Dharwar Craton	[19260] Manikyamba et al., 2015
B-2	VB209	47.4989	15.4798	12.8763	10.4847	10.8379	0.464192	1.30175	0.191731	0.794171	0.0706379	1.7	100	66.2341	308.419	30	4765.03	224	210		280	72	87	15	46	1.2	2	0.3	3.2	8	1.11	5.6	1.8	0.67	2.3	0.4	2.8	0.6	1.7	0.26	1.7	0.27	14	0.4	0.602209	Dharwar Craton	[22276] Dey et al., 2018
B-2	VB296	52.225	10.2963	9.83156	8.55098	15.8317	2.28233	0.309818	0.228233	0.392436	0.0516364	3.32	100	78.9597	225.455	31	2354.62	194	1560		390	96	43	292	35	0.7	1		3.1	6.9	0.84	3.8	1.1	0.53	1.3	0.3	2.1	0.5	1.4	0.22	1.4	0.21	12	1.1	0.310818	Dharwar Craton	[22276] Dey et al., 2018
B-2	BCB-14	50.9618	12.5636	16.6159	10.3462	5.51574	0.446104	2.0761	0.212959	1.15765	0.103956	0.92	100	43.6183	453.894	36.7	6945.9	324.33	58	48.93	45	6.23	114.32	48.01	42	2.23	3.24	0.35	4.45	12.22	1.79	9.15	2.67	0.99	3.18	0.64	4.4	0.88	2.74	0.41	2.64	0.4	22.31	1.36	0.70154	Dharwar Craton	[22867] Singh et al., 2019
B-2	RIH-17	52.1176	16.3187	10.277	9.71497	8.27981	0.471698	1.98715	0.150542	0.541951	0.140506	0.75	100	65.2488	613.476	32	3251.71	242	315	52	101	15.75	205	96.22	39.53	0.94	4.54	0.44	10.54	21.6	2.36	10.93	2.53	0.79	2.4		2.68		1.74		1.83	0.25	16.77	2.58	0.415033	Dharwar Craton	[9441] Naqvi et al., 2006
B-2	LAK-106	52.6455	13.7504	14.705	9.50543	5.27064	2.60993	0.253884	0.203108	0.893673	0.162486	1.15	100	45.5133	709.446	25	5362.04	226	390	68	244	7.64	405	143	67	1.88	2.88	0.22	11.49	30.02	4.14	17.53	4.1	1.31	4.21	0.65	3.47	0.72	1.91	0.28	1.86	0.28	20	1.81	0.241513	Dharwar Craton	[19260] Manikyamba et al., 2015
B-2	RM-10	49.6357	13.9764	14.8486	9.90251	8.12724	0.143663	1.53925	0.205233	1.54951	0.0718317	2.5	100	56.055	313.631	30	9297.08	335	103	56	68	1	166	12.65	48.78	1.07	4.99	0.35	8.66	21.56	2.82	16.66	5.11	1.67	5.92		7.55		4.21		4.17	0.57	53.27	0.56	0.555201	Dharwar Craton	[9441] Naqvi et al., 2006
B-2	LAK-129	51.5701	14.3031	13.9182	10.9502	5.81442	1.97528	0.151945	0.162075	0.962318	0.192464	0.95	100	49.3308	840.334	29	5773.91	226	377	67	270	3.83	395	104	71	1.95	2.72	0.27	17.05	43.7	5.85	24.37	5.32	1.67	5.37	0.77	4.37	0.82	2.33	0.33	2.26	0.33	25	1.94	0.153713	Dharwar Craton	[19260] Manikyamba et al., 2015
B-2	RM192	48.1975	10.5093	16.8312	9.03762	12.613	0.132074	1.87733	0.179243	0.575464	0.0471692	2.9	100	63.5892	205.95	31.64	3452.79	268	535	35.6	143	4.1	82.85	89.03	11.96	0.55	1.41	0.11	2.63	6.91	0.93	4.77	1.55	0.59	2.05	0.34	2.32	0.51	1.52	0.22	1.63	0.24	12.03		0.516572	Dharwar Craton	[8972] Naqvi et al., 2002
B-2	111	49.7419	14.5722	14.9568	8.38483	8.2228	0.172152	2.28861	0.172152	1.4076	0.0810128	2.1	100	56.1642	353.718	37	8445.59	405	114	63	144	5	126	31	16	0.59	3	0.13	4.17	11.02	1.48	7.21	2.48	0.99	2.96		3.6		2.31		2.53	0.32	32	0.28	0.69319	Dharwar Craton	[5684] Hanuma et al., 1997
B-2	SH-26	48.4043	15.0638	13.8298	10.883	7.04255	1.17021	2.60638	0.276596	0.648936	0.0744681	5.99	100	54.2703	325.142	32.5	3893.62	214	85.9	38.8	81.7	24.5	89.5	53.2	54.5	1.69	3.37	0.25	6.45	15.2	1.82	8.6	2.45	0.69	2.69	0.56	3.94	0.87	2.32	0.38	2.36	0.35	20.4	1.52	0.503428	Dharwar Craton	[22864] Giri et al., 2019
B-2	LAK-162	52.3566	13.2772	12.8761	10.9607	5.97673	2.3566	0.882471	0.170477	0.932611	0.21059	0.91	100	51.9637	919.476	46	5595.67	330	247	87	106	18.36	574	432	119	2.74	5.28	0.14	31.63	66.54	7.07	37.91	7.24	2.29	8.39	1.08	5.24	1.06	3.44	0.53	2.93	0.45	32	9.43	0.160843	Dharwar Craton	[19260] Manikyamba et al., 2015
B-2	SH-12	45.6411	12.4258	14.686	8.51995	14.988	0.0208312	2.7393	0.18748	0.697844	0.0937402	3.5	100	70.4005	409.288	35.1	4187.06	280	392	51.3	99.2	0.69	107	9.42	62.3	1.79	3.48	0.24	6.87	16.9	2.06	9.82	3.07	0.85	3.15	0.6	4.08	0.89	2.53	0.38	2.26	0.35	23.5	1.13	0.488079	Dharwar Craton	[22864] Giri et al., 2019
B-2	SH-34	53.5638	14.1277	11.3404	8.35106	5.76596	1.42553	3.62766	0.180851	1.23404	0.382979	5.85	100	54.2319	1672.16	28.7	7404.26	207	277	46.7	158	0.24	206	3.78	33.8	1.01	1.96	0.11	2.72	7.5	1.02	5.45	1.84	0.59	1.83	0.35	2.24	0.48	1.27	0.2	1.26	0.19	11.3	0.27	0.694312	Dharwar Craton	[22864] Giri et al., 2019
B-2	H-13	53.486	12.1018	14.7277	8.10178	6.51399	0.0610687	3.1145	0.244275	1.49618	0.152672	1.3	100	50.7575	666.595	49	8977.1	432	209	64	137	1.27	175	58	143	3.37	6.01	0.89	10.26	23.14	2.57	14.43	3.99	1.32	5.71	1.01	6	1.27	4.34	0.76	4.19	0.66	41	2.65	0.56441	Dharwar Craton	[13224] Manikyamba et al., 2009
B-2	s_H-13	53.4861	12.1018	14.7276	8.10179	6.514	0.0610688	3.11451	0.244275	1.49619	0.152672	1.3	100	50.7577	666.596	49	8977.11	432	209	64	137	1.27	175	58	143	3.37	6.01	0.89	10.26	23.14	2.57	14.43	3.99	1.32	5.71	1.01	6	1.27	4.34	0.76	4.19	0.66	41	2.65	0.56441	Dharwar Craton	[13224] Manikyamba et al., 2009
B-2	PNK6	51.9012	12.2306	14.8739	8.16389	7.80805	0.305002	2.64335	0.162668	1.69784	0.213501	1.93	100	55.0237	932.189	29	10187.1	271	122	43	52	6	328	105	148	3.4	7.8	1.1	12.19	29.61		20.59	5.49	1.75	7.55	1.22	6.86	1.47	4.91	0.8	4.45	0.66	45	1.33	0.616536	Dharwar Craton	[16378] Kerrich and Manikyamba , 2012
B-2	LAK-13	48.9234	12.919	15.6104	12.4314	6.36807	2.143	0.325005	0.182815	0.924233	0.172659	2.13	100	48.7363	753.863	38	5545.4	291	178	90	114	20.3	435	140	65	1.77	3.82	0.09	17.87	41.39		26.09	5.68	1.96	6.72	0.96	4.74	0.95	2.97	0.46	2.55	0.37	29	2.74	0.205971	Dharwar Craton	[19260] Manikyamba et al., 2015
B-2	LAK-10	51.721	12.7657	14.1122	10.5183	6.98522	1.77161	0.840251	0.161976	0.931363	0.192347	1.85	100	53.565	839.823	36	5588.18	277	161	72	68	81.8	541	179	93	2.24	4.12	0.12	18.79	42.41		26.22	5.49	1.97	6.68	0.97	4.79	0.95	3.03	0.46	2.55	0.38	29	2.16	0.21127	Dharwar Craton	[19260] Manikyamba et al., 2015
B-2	H-69	51.3391	12.5013	12.572	9.98484	10.0758	0.262759	2.00101	0.18191	0.990399	0.090955	1.96	100	65.1297	397.128	38	5942.4	278	520	49	154	4.19	143	72	31	0.84	3.2	0.43	4.34	10.95		8.16	2.37	0.85	3.34	0.58	3.33	0.72	2.33	0.41	2.2	0.32	23	0.62	0.71044	Dharwar Craton	[13224] Manikyamba et al., 2009
B-2	s_H-69	51.3411	12.5018	12.5686	9.98523	10.0762	0.262769	2.00109	0.181917	0.990438	0.0909586	1.96	100	65.1368	397.143	38	5942.63	278	520	49	154	4.19	143	72	31	0.84	3.2	0.43	4.34	10.95		8.16	2.37	0.85	3.34	0.58	3.33	0.72	2.33	0.41	2.2	0.32	23	0.62	0.71044	Dharwar Craton	[13224] Manikyamba et al., 2009
B-2	SH-30	52.952	13.0599	10.342	8.8864	11.0851	1.08917	1.94422	0.183225	0.407166	0.0508958	1.42	100	71.4118	222.221	25.7	2443	185	251	47.4	74.7	10.5	90.6	194	31.3	0.89	2.18	0.13	4.66	11.5		5.99	1.68	0.49	1.64	0.33	2.22	0.51	1.4	0.22	1.42	0.21	12.2	0.44	0.450752	Dharwar Craton	[22864] Giri et al., 2019
B-2	H-31	51.0591	13.1246	11.7969	10.5098	10.074	0.952671	1.54049	0.182426	0.658762	0.101348	1.2	100	66.5567	442.505	42	3952.57	270	218	52	108	40	112	174	81	1.92	3.87	0.86	6	13.76		8.57	2.21	0.8	2.89	0.53	2.87	0.65	2.15	0.38	2.25	0.35	19	1.54	0.62148	Dharwar Craton	[13224] Manikyamba et al., 2009
B-2	s_H-31	51.0612	13.1251	11.7933	10.5102	10.0744	0.95271	1.54055	0.182434	0.658789	0.101352	1.2	100	66.5645	442.523	42	3952.73	270	218	52	108	40	112	174	81	1.92	3.87	0.86	6	13.76		8.57	2.21	0.8	2.89	0.53	2.87	0.65	2.15	0.38	2.25	0.35	19	1.54	0.62148	Dharwar Craton	[13224] Manikyamba et al., 2009
B-2	H-21	52.0508	11.9492	15.0051	9.81726	6	0.172589	3.29949	0.22335	1.30964	0.172589	1.68	100	48.2371	753.557	44	7857.87	355	196	49	105	2.12	171	77	120	2.8	4.96	0.74	9.72	22.09		13.29	3.66	1.32	5.64	1.04	6.39	1.39	4.64	0.81	4.24	0.65	48	2.11	0.49168	Dharwar Craton	[13224] Manikyamba et al., 2009
B-2	s_H-21	52.0502	11.9491	15.006	9.81715	5.99994	0.172587	3.29946	0.223348	1.30963	0.172587	1.68	100	48.2353	753.549	44	7857.78	355	196	49	105	2.12	171	77	120	2.8	4.96	0.74	9.72	22.09		13.29	3.66	1.32	5.64	1.04	6.39	1.39	4.64	0.81	4.24	0.65	48	2.11	0.49168	Dharwar Craton	[13224] Manikyamba et al., 2009
B-2	N42	50.9668	10.7347	13.5914	8.05867	13.6456	0.194062	2.04276	0.204276	0.551544	0.0102138	1.98	100	70.058	44.5954	32	3309.26		638	56	20	6.43	162	37	40	0.93	3.88	0.33	7.75	18.95		8.95	2.48	0.63	2.49	0.41	2.5	0.55	1.66	0.23	2.61	0.22	16	2.08	0.482389	Dharwar Craton	[13383] Manikyamba and Naqvi, 1997
B-2	H-22	52.9101	12.3921	14.8603	8.62367	5.98273	0.172676	3.32148	0.172676	1.40173	0.162519	1.26	100	48.4072	709.59	46	8410.36	383	199	49	82	3.09	168	50	129	2.91	5.96	0.87	8.58	20.42		12.54	3.47	1.28	4.79	0.93	5.39	1.2	3.84	0.66	3.66	0.56	36	2.34	0.669308	Dharwar Craton	[13224] Manikyamba et al., 2009
B-2	s_H-22	52.9125	12.3926	14.8564	8.62406	5.98301	0.172684	3.32164	0.172684	1.40179	0.162527	1.26	100	48.4149	709.623	46	8410.75	383	199	49	82	3.09	168	50	129	2.91	5.96	0.87	8.58	20.42		12.54	3.47	1.28	4.79	0.93	5.39	1.2	3.84	0.66	3.66	0.56	36	2.34	0.669308	Dharwar Craton	[13224] Manikyamba et al., 2009
B-2	s_H-27	53.5932	11.7696	12.5719	9.42175	8.66963	0.162619	2.67305	0.19311	0.843587	0.101637	1.06	100	61.6435	443.767	44	5061.52	300	127	51	93	1.49	111	49	65	1.56	3.63	0.77	5.49	13.14		8.14	2.27	0.85	3.18	0.61	3.66	0.78	2.51	0.42	2.37	0.35	25	1.49	0.637091	Dharwar Craton	[13224] Manikyamba et al., 2009
B-2	s_H-14	53.9912	12.1549	15.9009	8.2251	5.29047	0.121853	2.48784	0.223398	1.45209	0.152317	1.21	100	43.6744	665.045	45	8712.51	397	180	51	128	1.57	195	112	119	2.78	5.39	0.81	8.86	21.06		12.72	3.5	1.81	5.31	0.96	5.66	1.23	4.12	0.73	4	0.6	40	2.52	0.586168	Dharwar Craton	[13224] Manikyamba et al., 2009
B-2	s_H-26	53.3062	10.8613	14.1705	9.51752	8.76986	0.191967	2.07122	0.202071	0.808282	0.101035	1.11	100	59.055	441.14	46	4849.69	310	142	51	94	2.34	102	44	73	1.81	3.89	0.66	5.96	14.4		8.74	2.36	0.87	3.41	0.64	3.72	0.82	2.7	0.45	2.55	0.39	25	1.62	0.628884	Dharwar Craton	[13224] Manikyamba et al., 2009
B-2	s_H-32	51.0403	12.9441	12.7385	10.2625	9.52658	0.96778	1.49199	0.201621	0.725835	0.10081	1	100	63.5419	440.158	38	4355.01	260	261	49	109	39	95	190	80	1.86	3.83	0.68	5.78	13.92		8.4	2.18	0.8	2.81	0.51	2.82	0.61	2.03	0.37	2.18	0.32	18	1.51	0.638467	Dharwar Craton	[13224] Manikyamba et al., 2009
B-2	s_H-20	52.548	12.522	15.2498	6.73485	7.33978	0.171396	3.7203	0.211724	1.351	0.151232	1.29	100	52.8675	660.307	45	8106.02	370	205	40	73	5.32	117	69	123	2.88	5.65	0.7	8.92	21.54		13.11	3.56	1.19	4.88	0.9	5.21	1.11	3.64	0.61	3.55	0.53	35	2.24	0.61031	Dharwar Craton	[13224] Manikyamba et al., 2009
B-2	s_H-10	53.1295	12.2101	12.8502	8.28504	9.21572	0.323714	2.84261	0.202321	0.839632	0.10116	1.02	100	62.5657	441.687	47	5037.79	314	233	54	110	9.86	170	102	84	1.96	4.29	0.66	5.67	13.91		8.29	2.2	0.91	3.19	0.61	3.66	0.82	2.64	0.46	2.58	0.4	25	1.67	0.729023	Dharwar Craton	[13224] Manikyamba et al., 2009
B-2	RIH-3	52.7904	15.39	10.4249	9.24412	8.80008	0.464224	2.08901	0.151378	0.565143	0.0807347	0.75	100	66.2991	352.504	71	3390.86		412	99	142	10.03	203	80.98	56.21	1.9	6.03	1.55	13.12	19		10.6	8.26	1.79	5.66		3.65		3.53		2.77	1.06	54.58	0.93	0.442844	Dharwar Craton	[9441] Naqvi et al., 2006
B-2	KT18	49.8325	13.2555	12.2948	11.9698	9.16918	0.019933	2.69096	0.189364	0.578057		2.1	100	63.4775		43.7	3468.34		399	36	170	3	47	26	69	1.52	4	0.33	8.6	39		9.4	2.3	0.79	2.4	0.49				0.32	2.1	0.31	21	1.16	0.448156	Dharwar Craton	[7348] Drury, 1981
B-2	KT9	51.5999	14.367	13.6056	9.04516	8.29645	0.0303529	2.1247	0.172	0.758822		4.2	100	58.6964		36.4	4552.93	151	446	38	189	3	142	51	89	2.03	4	0.34	12	22		11.6	2.9	0.95	4.2	0.61				0.36	2.19	0.33	22	1.62	0.321178	Dharwar Craton	[7348] Drury, 1981
B-2	I234	51.2139	14.193	12.9056	8.66468	7.44388	0.0794014	4.46633	0.168728	0.813864	0.0506184	1.5	100	57.3419	221.01	39	4883.19	148	241	34	110	4	138	31	94	2.26	5	0.39	12	36		12.4	3.3	0.97	4	0.66				0.49	2.73	0.42	25	1	0.401473	Dharwar Craton	[7348] Drury, 1981
HMA	G-57	55.4311	13.3527	11.3123	9.5119	6.15123	0.140028	2.95059	0.160032	0.860172	0.130026		100	55.8937	567.719	32	5161.03	101	11	40	89	3	191	48	83	2.42	4.3		8.16	18.16	2.72	11.63	3.47	1.13	4.38	0.83	5.74	1.29	3.65	0.58	3.92	0.6	35	1.29	0.507745	Dharwar Craton	[18327] Khanna, 2013
HMA	LAK-247	54.3399	14.8651	9.81545	12.8574	5.44514	1.30805	0.141959	0.162239	0.963293	0.101399	1.52	100	56.3861	442.729	50	5779.76	352	185	51	118	5.7	152	76	40	1.29	3.7	0.29	6.24	14.84	2.24	10.08	2.92	1.06	3.58	0.66	4.34	0.95	2.63	0.4	2.76	0.43	26	0.71	0.571326	Dharwar Craton	[19260] Manikyamba et al., 2015
HMA	TVR-5	59.3363	11.8952	7.47701	12.0752	5.89764	0.289884	1.85926	0.129948	0.89964	0.139944		100	64.7668	611.023	16	5397.84	108	284		186	15	330	80	91	2.34	4.69	0.3	7.19	16.57	2.35	10.27	2.57	0.88	2.7	0.41	2.27	0.46	1.16	0.17	1.12	0.17	13	0.74	0.628509	Dharwar Craton	[19258] Khanna et al., 2015
HMA	41	54.7102	14.4701	11.3797	7.66966	6.7493	1.20669	2.60768	0.173846	0.920359	0.112488	3.14	100	58.0224	491.146	39	5522.15	254	155	48	76	128		181	87	2.02	4	0.27	14.06	27.1	3.18	11.16	2.81	0.91	3.08		3.15		1.58		1.67	0.27	20	2.74	0.274121	Dharwar Craton	[5684] Hanuma et al., 1997
HMA	TVR-4	56.7343	12.0188	8.23918	9.58904	8.59914	1.0299	2.86971	0.119988	0.679932	0.119988		100	70.8652	523.891	16	4079.59	116	257		188	68	404	123	89	2.34	4.12	0.27	6.39	15.55	2.29	9.85	2.42	0.86	2.53	0.39	2.12	0.43	1.12	0.17	1.15	0.18	13	0.83	0.621246	Dharwar Craton	[19258] Khanna et al., 2015
HMA	LAK-263	55.4213	12.731	9.35025	7.86802	8.47716	2.2335	2.85279	0.162437	0.588832	0.314721	1.76	100	67.8755	1374.13	51	3532.99	370	216	62	120	4.1	146	82	39	1.18	3.92	0.39	5.63	13.97	2.08	9.66	2.96	1.03	3.53	0.66	4.26	0.94	2.57	0.38	2.7	0.39	26	0.71	0.67088	Dharwar Craton	[19260] Manikyamba et al., 2015
HMA	KN98	54.1908	12.8626	9.07181	10.8122	10.2821	0.120024	1.85037	0.180036	0.590118	0.040008	0.83	100	72.5381	174.683	25.89	3540.71		24.63	23.92	12.98	1.66	38.99	27.28	28.75	0.79	1.86	0.44	2.64	6.95	0.93	4.56	1.43	0.52	1.57	0.32	1.94	0.37	1.17	0.2	1.15	0.18	12.32	0.92	0.678854	Dharwar Craton	[12271] Naqvi et al., 2008
HMA	s_H-15	61.1429	11.5326	11.8162	5.19978	6.40362	0.131512	2.25593	0.171977	1.17349	0.171977	1.98	100	55.8105	750.886	37	7040.94	306	204	45	72	2.74	159	54	102	2.38	4.65	0.57	7.23	17.59		10.3	2.81	0.97	3.8	0.68	3.98	0.84	2.78	0.49	2.71	0.4	26	1.73	0.619701	Dharwar Craton	[13224] Manikyamba et al., 2009
ADK	BA2-B	47.1831	3.21932	12.5755	5.23139	31.1871		0.130785	0.160966	0.311871		8.5	100	85.25		17.2	1871.23	85.9	2250	120	2590	0.546	34.7	5.34	21.2	0.592	1.27	0.0798	1.76	4.54	0.75	3.65	1.1	0.402	1.34	0.22	1.41	0.289	0.855		0.806	0.12	6.96	0.133	0.695278	Kappvaal Craton	[16702] Robin-Popieul et al., 2012
ADK	RIG24	49.6567	6.57659	13.8099	7.41975	21.4458	0.00991945	0.218228	0.218228	0.575328	0.0694361		100	78.3508	303.172	30	3451.97	187	2638		897	2	17	12	47		3.2		3.73	9.21	1.4	6.9	2.12	0.76	2.54	0.44	2.71		1.55		1.64		17		0.826625	Kappvaal Craton	[5321] Riganti and Wilson, 1995
ADK	BA1-B	47.4034	3.32126	11.5741	5.43478	31.5016	0.0402576	0.221417	0.181159	0.322061		8.4	100	86.3816		17.8	1932.37	80.6	2250	120	2120	0.491	29.2	4.44	21.2	0.588	1.37	0.0833	1.6	4.24	0.689	3.44	0.993	0.351	1.25	0.206	1.34	0.27	0.765		0.705	0.102	6.82	0.139	0.825026	Kappvaal Craton	[16702] Robin-Popieul et al., 2012
ADK	BD5	46.7807	3.42052	12.8773	5.4326	30.7847		0.181087	0.181087	0.342052		7.3	100	84.7824		16.8	2052.31	104	3370	112	1420	0.996	21.9	13.7	23.3	0.657	1.21	0.0785	1.49	3.96	0.644	3.23	0.985	0.344	1.27	0.217	1.42	0.3	0.837		0.786	0.113	7.47	0.12	0.782468	Kappvaal Craton	[16702] Robin-Popieul et al., 2012
ADK	BD18	45.9204	2.00965	9.34486	2.00965	40.3939		0.0200965	0.100482	0.200965		13	100	90.9697		11.4	1205.79	60.7	1530	110	2280	0.686	36.4	16.7	12.8	0.349	0.751	0.0499	0.988	2.58	0.404	2.06	0.582	0.249	0.737	0.125	0.789	0.163	0.478		0.418	0.0646	4.4	0.0946	0.732403	Kappvaal Craton	[16702] Robin-Popieul et al., 2012
ADK	SS018	45.6056	3.22158	12.1816	3.42293	35.1354			0.171147	0.261754		9.5	100	87.0497		13	1570.52	79.2	4150	129	1720	0.124	10.1	3.65	22.6	0.602	1.4	0.094	1.96	4.86	0.701	3.14	0.852	0.292	1.01	0.174	1.11	0.235	0.684		0.646	0.094	6.06	0.212	0.688239	Kappvaal Craton	[16702] Robin-Popieul et al., 2012
ADK	HOG4	45.2895	4.84164	14.2223	4.13557	30.7646	0.0907807	0.0907807	0.181561	0.383296		9.8	100	83.4469		22	2299.78	141	4200	127	2020	3.48	12.9	3.96	22.2	0.638	1.03	0.0677	1.31	3.45	0.52	2.56	0.899	0.369	1.28	0.223	1.51	0.315	0.898		0.796	0.114	8.23	0.117	0.757588	Kappvaal Craton	[16702] Robin-Popieul et al., 2012
ADK	SS0110	47.021	3.51653	11.8557	5.72692	31.0459	0.0602833	0.271275	0.170803	0.331558		7.5	100	85.9209		17.6	1989.35	103	1940	107	1570	2.24	48.8	12.6	29.2	0.809	1.72	0.112	2.27	6.03	0.906	4.28	1.26	0.416	1.48	0.25	1.59	0.332	0.932		0.863	0.131	8.48	0.215	0.730079	Kappvaal Craton	[16702] Robin-Popieul et al., 2012
ADK	SS019	45.1704	3.0248	12.2	2.6215	36.6001			0.161323	0.221819		9.8	100	87.4867		12	1330.91	76.7	4380	133	1910	0.324	20.4	4.08	19.6	0.522	1.22	0.0812	1.75	4.43	0.631	2.85	0.771	0.29	0.914	0.153	0.962	0.206	0.597		0.556	0.0849	5.33	0.184	0.671721	Kappvaal Craton	[16702] Robin-Popieul et al., 2012
ADK	BD4	48.3369	3.71822	12.2601	5.02462	29.8462		0.311526	0.160788	0.341674		8.5	100	85.0152		18.5	2050.05	110	2040	105	1430	0.991	20.2	7.84	23.8	0.664	1.41	0.0961	1.9	5.14	0.775	3.78	1.16	0.476	1.36	0.242	1.46	0.304	0.868		0.808	0.117	7.87	0.159	0.715044	Kappvaal Craton	[16702] Robin-Popieul et al., 2012
ADK	BD1	45.1853	2.20906	10.242	3.21317	38.7589		0.0401647	0.130535	0.220906		13.2	100	89.816		11.9	1325.43	65.9	1590	112	2140	1.08	49.4	15.3	13.9	0.368	0.857	0.0538	1.18	3.19	0.474	2.31	0.686	0.239	0.805	0.13	0.883	0.177	0.505		0.463	0.0678	4.7	0.161	0.699787	Kappvaal Craton	[16702] Robin-Popieul et al., 2012
ADK	BD23	45.505	1.71527	11.5024	0.100898	40.8637			0.141257	0.171527		11.8	100	89.2234		10.8	1029.16	55.6	3130	128	3190	0.469	3.88	31.2	11.1	0.303	0.658	0.0434	0.675	2.06		1.51	0.509	0.159	0.59	0.105	0.676	0.142	0.397		0.403	0.0571	3.24	0.0746	0.939268	Kappvaal Craton	[16702] Robin-Popieul et al., 2012
AUK	WP105	53.2729	4.0282	8.05639	11.279	23.0614		0.100705	0.100705	0.100705		4.5	100	86.964		17.1	604.23	79.6	3780	96.9	1360	0.403	2.89	4.56	5.03	0.162	0.17	0.0102	0.407	0.875	0.134	0.687	0.234	0.0942	0.38	0.0682	0.5	0.118	0.39		0.386	0.0596	3.35	0.0202	0.402459	Kappvaal Craton	[16702] Robin-Popieul et al., 2012
AUK	SA 510-1	45.8202	3.07698	8.66057	2.22969	39.9115	0.0222969	0.0445939	0.122633	0.100336	0.0111485	11	100	91.4821	48.6764	10.5	602.017	62	1967		2098		2	8	4.3	0.14	0.15	0.01	0.24	0.61	0.1	0.51	0.19	0.08	0.29	0.06	0.41	0.09	0.26	0.04	0.26	0.04	2.3	0.03	0.602209	Kappvaal Craton	[22846] Huber and Byerly, 2019
AUK	HB 3-10	45.1911	3.55473	10.4061	4.03692	36.3323	0.0112137	0.0560684	0.187268	0.201846	0.0224273	9.7	100	89.0552	97.9222	13.6	1211.08	86	3605		1867		3	6	10	0.3	0.44	0.03	0.51	1.4	0.24	1.2	0.42	0.08	0.59	0.11	0.72	0.15	0.43	0.07	0.41	0.07	3.9	0.07	0.831285	Kappvaal Craton	[22846] Huber and Byerly, 2019
AUK	SA 355-6	45.5911	2.74061	10.6878	1.17737	39.4865		0.0791512	0.118727	0.098939	0.0197878		100	89.5943	86.3974	11	593.634		6624		1941	1	13	3	5	0.15	0.23	0.02	0.38	0.9	0.13	0.64	0.22	0.15	0.31	0.06	0.4	0.09	0.25	0.04	0.23	0.04	2.48	0.06	0.583192	Kappvaal Craton	[16344] Stiegler et al., 2012
AUK	WP107	46.9474	4.83578	9.16784	4.73504	33.5483		0.292162	0.130969	0.141044	0.201491	9.2	100	89.5047	879.75	20.6	846.262	104	2840	99	1630	0.689	45.1	6.24	7.17	0.232	0.206	0.0151	0.279	0.807	0.14	0.759	0.29	0.111	0.478	0.0936	0.679	0.163	0.495		0.521	0.0786	4.25	0.0186	0.711427	Kappvaal Craton	[16702] Robin-Popieul et al., 2012
AUK	SA 355-7	47.4356	4.22595	10.295	1.76164	35.8266	0.0395874	0.0791748	0.148453	0.15835	0.0296905		100	89.0232	129.635	15.7	950.097		2441		1915	7.5	7	8	9	0.28	0.49	0.04	0.89	1.89	0.24	1.14	0.39	0.14	0.51	0.1	0.67	0.14	0.4	0.06	0.39	0.06	3.89	0.2	0.530485	Kappvaal Craton	[16344] Stiegler et al., 2012
AUK	SA 500-7	52.2214	4.66187	8.30605	8.13977	26.2164	0.0105711	0.116282	0.158567	0.158567	0.0105711	5.3	100	88.0322	46.1556	22	951.401	97	2917		457		5	8	6.3	0.19	0.19	0.01	0.28	0.75	0.12	0.69	0.25	0.09	0.38	0.08	0.58	0.14	0.4	0.06	0.42	0.07	3.5	0.04	0.653827	Kappvaal Craton	[22846] Huber and Byerly, 2019
AUK	SA719-4	45.8983	2.61701	9.15954		42.0735			0.130851	0.120785		13.4	100	91.4566		12.6	724.711	62	2260	143	2760	2.12	4.7	11.9	6.77	0.185	0.301	0.0156	0.407	1.09	0.174	0.899	0.31	0.136	0.42	0.0705	0.492	0.11	0.334		0.333	0.0503	3.24	0.0401	0.712589	Kappvaal Craton	[16702] Robin-Popieul et al., 2012
AUK	SA 510-3	46.1258	1.8959	7.52875	0.346811	43.9293		0.0231207	0.0693621	0.0693621	0.0115604	13	100	93.1498	50.4748	7.6	416.173	39	1863		2803		7	35	3	0.09	0.09	0.01	0.18	0.46	0.07	0.32	0.12	0.05	0.17	0.03	0.23	0.06	0.16	0.03	0.17	0.03	1.4	0.06	0.481767	Kappvaal Craton	[22846] Huber and Byerly, 2019
AUK	SA 500-4	46.282	3.76662	10.0539	2.87191	36.6721	0.0110458	0.0441833	0.165687	0.121504	0.0110458	10	100	89.4743	48.2282	13.5	729.024	74	3561		1580	1	2	9	4.9	0.16	0.14	0.01	0.22	0.61	0.1	0.51	0.21	0.08	0.32	0.07	0.49	0.11	0.32	0.05	0.32	0.05	2.7	0.04	0.613158	Kappvaal Craton	[22846] Huber and Byerly, 2019
AUK	MC 4-1	46.3501	2.46554	9.70588	0.0990176	41.1022		0.0792141	0.108919	0.0693123	0.0198035		100	90.7996	86.466	15.1	415.874		2719		2179	0.9	3	4	5	0.17	0.2	0.01	0.24	0.64	0.1	0.53	0.23	0.1	0.39	0.08	0.55	0.12	0.36	0.05	0.35	0.06	3.22	0.03	0.802945	Kappvaal Craton	[16344] Stiegler et al., 2012
AUK	SA 700-4	45.7482	2.84378	9.01887	2.56634	39.4364	0.00990864	0.108995	0.108995	0.138721	0.0198173		100	91.0638	86.5262	11.7	832.326		1816		2066	1	1	1	6	0.18	0.27	0.02	0.39	1	0.15	0.78	0.3	0.11	0.41	0.08	0.53	0.11	0.31	0.05	0.3	0.05	2.9	0.05	0.667062	Kappvaal Craton	[16344] Stiegler et al., 2012
AUK	SA719-1	45.6924	3.01932	9.05797	2.71739	39.2512		0.0201288	0.100644	0.140902		10.9	100	90.99		15.4	845.411	81.1	2480	126	2550	2.15	2.72	1.85	9.2	0.235	0.39	0.0173	0.443	1.21	0.193	0.963	0.345	0.126	0.487	0.0848	0.557	0.128	0.382		0.379	0.0583	4	0.0467	0.848258	Kappvaal Craton	[16702] Robin-Popieul et al., 2012
AUK	HB 2-1	45.4729	2.93703	9.59062	0.0566993	41.6173	0.0226797	0.0680392	0.103193	0.113399	0.0181438	12	100	91.0015	79.2194	10.4	680.392	55	2060		2194	2	3	22	5.9	0.18	0.27	0.02	0.47	1.1	0.15	0.68	0.22	0.09	0.29	0.05	0.36	0.08	0.25	0.04	0.25	0.04	2.1	0.1	0.55352	Kappvaal Craton	[22846] Huber and Byerly, 2019
AUK	MC 5-5	47.7968	6.60767	10.7074	8.28926	25.7383	0.0197834	0.445128	0.148376	0.217618	0.0296752		100	84.8531	129.568	33.7	1305.71		3437		830	0.2	10	2	17	0.54	0.6	0.04	0.43	1.49	0.3	1.78	0.78	0.36	1.23	0.25	1.8	0.41	1.16	0.17	1.1	0.18	10.73	0.06	1.34447	Kappvaal Craton	[16344] Stiegler et al., 2012
AUK	SA 442-3	46.0342	3.08766	9.68307	2.02102	38.8484	0.0112279	0.0336836	0.145962	0.123506	0.0112279	11	100	90.3381	49.0231	11.7	741.039	65	3715		1917	1	2	12	5.2	0.17	0.21	0.01	0.32	0.88	0.14	0.72	0.25	0.1	0.35	0.07	0.48	0.11	0.31	0.05	0.29	0.05	2.6	0.04	0.632319	Kappvaal Craton	[22846] Huber and Byerly, 2019
AUK	HB 2-8	47.5532	3.99625	10.1479	2.90231	35.0509	0.0223254	0.0446509	0.132836	0.133953	0.0156278	9.5	100	88.9497	68.2341	15.2	803.716	85	4746		1636	4	9	21	5.6	0.17	0.18	0.01	0.3	0.79	0.12	0.63	0.24	0.1	0.37	0.07	0.52	0.12	0.34	0.05	0.34	0.05	2.9	0.05	0.578121	Kappvaal Craton	[22846] Huber and Byerly, 2019
AUK	WP104	46.9252	3.81833	9.24437	3.31592	36.3746		0.0502412	0.150723	0.120579		11	100	90.1672		17	723.473	81.3	2420	106	1850	1.94	3.08	2.8	5.83	0.178	0.179	0.0113	0.234	0.674	0.111	0.584	0.23	0.118	0.369	0.0709	0.539	0.124	0.394		0.398	0.0622	3.28	0.014	0.737063	Kappvaal Craton	[16702] Robin-Popieul et al., 2012
AUK	MC 7-3	46.4107	4.02926	9.99012	3.32637	35.8277		0.098999	0.158398	0.138599	0.0197998		100	89.3139	86.4498	7.3	831.592		3595		1788	0.2	3		2	0.06	0.08	0.01	0.12	0.29	0.04	0.24	0.1	0.04	0.16	0.03	0.22	0.05	0.15	0.02	0.13	0.02	1.31	0.02	0.642356	Kappvaal Craton	[16344] Stiegler et al., 2012
AUK	MC5-5	47.4177	6.94654	10.4702	7.85261	26.6787		0.251686	0.140944	0.241619		7.5	100	85.5872		32.7	1449.71	158	3800	105	1280	0.979	4.9	11.5	11.8	0.343	0.502	0.0235	0.469	1.38	0.231	1.24	0.446	0.199	0.741	0.128	0.972	0.227	0.688		0.74	0.112	6.55	0.0357	1.03133	Kappvaal Craton	[16702] Robin-Popieul et al., 2012
AUK	HB 2-9	46.3397	2.62434	6.31926	0.945709	43.5026		0.0354641	0.135946	0.0827495	0.0141856	14	100	94.1326	61.9373	10.3	496.497	44	2953		2728		17	8	4	0.11	0.16	0.01	0.28	0.74	0.11	0.53	0.19	0.09	0.27	0.05	0.36	0.08	0.23	0.04	0.23	0.04	2	0.05	0.550591	Kappvaal Craton	[22846] Huber and Byerly, 2019
AUK	SA 510-2	46.1726	2.87321	7.55425	1.56517	41.5888	0.0111798	0.055899	0.0782586	0.0894384	0.0111798	11	100	92.7695	48.8132	9.59	536.63	58	1877		2207	1	2	7	4.1	0.13	0.12	0.01	0.21	0.58	0.09	0.47	0.17	0.07	0.26	0.05	0.38	0.08	0.25	0.04	0.24	0.04	2.1	0.04	0.550591	Kappvaal Craton	[22846] Huber and Byerly, 2019
AUK	MC 5-4	49.1109	3.88967	10.1416	5.00808	31.3846	0.0197948	0.108871	0.158358	0.158358	0.0197948		100	87.8228	86.4279	11.7	950.15		3073		1158	0.5	6	1	4	0.12	0.15	0.01	0.2	0.5	0.07	0.39	0.18	0.07	0.28	0.06	0.4	0.09	0.27	0.04	0.25	0.04	2.44	0.02	0.722651	Kappvaal Craton	[16344] Stiegler et al., 2012
AUK	SA719-2	46.8248	7.13424	11.254	8.23955	25.9244		0.100482	0.160772	0.361736		7.7	100	84.2976		27.8	2170.42	175	2170	83.3	608	1.15	9.74	2.45	20.8	0.577	1.07	0.0493	0.917	2.64	0.424	2.19	0.744	0.27	1.07	0.18	1.29	0.281	0.842		0.86	0.131	7.91	0.107	1.1243	Kappvaal Craton	[16702] Robin-Popieul et al., 2012
AUK	MC4-3	45.6473	2.9287	8.98808	2.01979	40.1939		0.010099	0.121188	0.0908907		10.9	100	91.2448		15.1	545.344	77.2	5160	151	1580	1.21	1.06	0.574	5.46	0.144	0.197	0.00825	0.192	0.571	0.0939	0.474	0.174	0.076	0.285	0.0492	0.379	0.0843	0.266		0.283	0.0429	2.68	0.0139	0.988626	Kappvaal Craton	[16702] Robin-Popieul et al., 2012
AUK	HB 2-2	45.4535	3.25935	9.01879	2.43897	39.4669	0.0110862	0.0776035	0.121948	0.133035	0.0188466	9.8	100	91.0702	82.2878	11.8	798.207	73	2078		2039		1	3	7.1	0.21	0.21	0.02	0.3	0.84	0.13	0.65	0.25	0.1	0.39	0.08	0.57	0.12	0.35	0.05	0.33	0.05	3	0.06	0.674474	Kappvaal Craton	[22846] Huber and Byerly, 2019
AUK	SA 500-3	47.0628	4.14999	10.3247	3.11527	34.9355	0.011126	0.0667558	0.155764	0.155764	0.0222519	9.6	100	88.7459	97.1563	15.1	934.581	99	4798		1512	1	9	16	5.8	0.18	0.17	0.01	0.28	0.78	0.12	0.66	0.25	0.13	0.41	0.08	0.6	0.13	0.4	0.06	0.39	0.06	3.4	0.03	0.585003	Kappvaal Craton	[22846] Huber and Byerly, 2019
AUK	SS011	45.1158	3.22256	11.279	4.22961	35.5488	0.151057	0.120846	0.171198	0.161128		8.6	100	88.0171		11.8	966.767	81.7	2530	118	2070	3.03	29.1	11.5	7.18	0.213	0.431	0.028	0.523	1.43	0.215	1.06	0.341	0.132	0.477	0.081	0.57	0.124	0.371		0.363	0.0535	3.24	0.0354	0.794041	Kappvaal Craton	[16702] Robin-Popieul et al., 2012
AUK	SS013	45.4774	3.11903	10.8663	4.02455	36.0197	0.0905524	0.100614	0.150921	0.150921		8.9	100	88.5389		11.2	905.524	76.3	2340	115	2080	2.72	16.7	13.5	6.47	0.185	0.4	0.0253	0.483	1.28	0.186	0.958	0.329	0.121	0.432	0.0776	0.552	0.116	0.345		0.339	0.0511	2.99	0.0312	0.797958	Kappvaal Craton	[16702] Robin-Popieul et al., 2012
AUK	HB 2-4	45.9418	3.88397	9.87858	3.10718	36.7313	0.0665823	0.0998735	0.139823	0.133165	0.0177553	8.7	100	89.6539	77.5231	13.3	798.988	80	3872		1694	3	5	6	5.8	0.16	0.22	0.02	0.29	0.83	0.13	0.67	0.24	0.11	0.38	0.08	0.54	0.12	0.35	0.05	0.32	0.05	2.9	0.05	0.730957	Kappvaal Craton	[22846] Huber and Byerly, 2019
AUK	SA 500-1	45.5749	2.38781	8.34387	0.0470673	43.3938		0.0229597	0.137758	0.0803588	0.0114798	13	100	92.3782	50.1232	10	482.153	48	2126		2300		1	12	3	0.09	0.08	0.004	0.15	0.41	0.06	0.33	0.12	0.05	0.19	0.04	0.31	0.07	0.19	0.03	0.21	0.03	1.7	0.03	0.513885	Kappvaal Craton	[22846] Huber and Byerly, 2019
AUK	HB 2-6	45.0506	3.14358	8.648	2.65655	40.1803	0.0221379	0.0442758	0.1284	0.110689	0.0154965	7.9	100	91.5455	67.6609	11.9	664.137	62	2252		2100	1	4	6	5.2	0.16	0.21	0.02	0.3	0.79	0.11	0.58	0.2	0.09	0.3	0.06	0.43	0.1	0.27	0.04	0.28	0.04	2.4	0.07	0.674474	Kappvaal Craton	[22846] Huber and Byerly, 2019
AUK	HB 2-5	48.7725	6.12133	10.5471	2.6423	31.2672	0.176153	0.0770671	0.165144	0.209182	0.0220192	9	100	87.3559	96.1401	20.4	1255.09	120	3069		1302	12	17	15	9.6	0.29	0.32	0.02	0.44	1.3	0.2	1.03	0.39	0.17	0.59	0.12	0.83	0.19	0.54	0.08	0.51	0.08	4.6	0.07	0.700752	Kappvaal Craton	[22846] Huber and Byerly, 2019
AUK	MC5-7	48.8173	5.13337	8.25365	5.33468	31.7061		0.412682	0.150981	0.191243		8.9	100	89.9523		21.1	1147.46	115	2920	86.1	1440	0.857	7.16	11.2	8.64	0.255	0.305	0.019	0.33	1.07	0.18	0.982	0.359	0.134	0.567	0.106	0.74	0.166	0.509		0.523	0.0788	4.66	0.0268	0.890539	Kappvaal Craton	[16702] Robin-Popieul et al., 2012
AUK	HB 2-3	45.3483	2.96379	8.48225	1.78273	41.1143	0.0222842	0.0557104	0.103621	0.111421	0.0155989	9.3	100	91.8674	68.108	11.4	668.525	65	1937		2244		2	1	6	0.18	0.15	0.01	0.28	0.74	0.1	0.54	0.2	0.09	0.34	0.07	0.47	0.11	0.3	0.04	0.28	0.05	2.7	0.1	0.516179	Kappvaal Craton	[22846] Huber and Byerly, 2019
AUK	HB 2-7	45.1342	2.94023	8.54895	2.16991	40.9029	0.0216991	0.0433983	0.12694	0.0976462	0.0141044	7.6	100	91.7698	61.5828	11.4	585.877	58	2185		2205	2	4	3	4.4	0.14	0.16	0.01	0.25	0.71	0.1	0.55	0.18	0.08	0.27	0.06	0.41	0.09	0.27	0.04	0.27	0.04	2.3	0.04	0.616662	Kappvaal Craton	[22846] Huber and Byerly, 2019
AUK	SA 510-4	46.5247	2.2038	5.01505	1.28263	44.7756		0.0233206	0.0932825	0.0699619	0.0116603	14	100	95.4144	50.9112	7.95	419.771	40	2127		2803		19	8	2.9	0.09	0.07	0.004	0.15	0.43		0.33	0.12	0.04	0.2	0.04	0.27	0.06	0.18	0.03	0.18	0.03	1.6	0.03	0.449649	Kappvaal Craton	[22846] Huber and Byerly, 2019
AUK	HB 3-4	45.4889	3.46582	8.32439	1.93813	40.4726	0.0114007	0.045603	0.135669	0.102607	0.014821	12	100	91.8902	64.7112	13.9	615.64	59	2313		2171	1	2	5	5	0.16	0.14	0.01	0.22	0.65		0.52	0.18	0.09	0.28	0.06	0.46	0.1	0.3	0.05	0.29	0.05	2.6	0.06	0.613158	Kappvaal Craton	[22846] Huber and Byerly, 2019
AUK	HB 1-7	45.7781	2.63079	7.47037		43.8079		0.0463575	0.172682	0.0811257	0.0127483	13	100	93.1818	55.6617	10.8	486.754	50	2763		2250		2	1	3.8	0.12	0.12	0.01	0.17	0.51		0.38	0.14	0.06	0.22	0.05	0.35	0.08	0.22	0.03	0.23	0.04	1.9	0.04	0.680142	Kappvaal Craton	[22846] Huber and Byerly, 2019
AUK	SA564-6	46.5163	5.35642	10.8739	5.66855	31.1116	0.0302054	0.0604108	0.165123	0.187273	0.0302054	8.73	100	86.9585	131.883		1123.64	116	2843	97	1837				10	0.26	0.4	0.023	0.4	1.2		1.1	0.39	0.19	0.59		0.79		0.54		0.55	0.087	5.2	0.025	0.963534	Kappvaal Craton	[15726] Connolly et al., 2011
B-1	D15	50.4668	13.6966	13.6864	10.2977	6.53469	0.617053	2.63006	0.201301	1.68931	0.180058	0.53	100	52.6675	786.169	26	10135.9	282	88	43	75	17	258	108	107		7		7.99	20.14	3.16	16.15	4.49	1.48	4.54	0.91	3.93	1.02	2.8	0.43	2.71	0.37	24.99	0.87	0.844148	Kappvaal Craton	[16588] Mare and Fourie, 2012
B-1	H211	49.5792	15.2831	12.0727	9.44416	8.35325	0.27013	3.33506	0.155844	1.34026	0.166234	2.74	100	61.7224	725.809	28	8041.56	246	212	49	125	9.4	166	71	90		4.9		5.96	15.05	2.3	11.53	3.24	0.84	3.81	0.74	4.13	1.04	3.04	0.48	3.28	0.49	26.76	0.95	0.792168	Kappvaal Craton	[16588] Mare and Fourie, 2012
B-1	AH10	48.685	16.4212	15.9478	3.43993	9.23627	4.5971	0.0841574	0.210393	1.26236	0.115716	3.93	100	57.4418	505.241		7574.16	507	163	56	115	118.41	60.7	177		1.56	3.01		2.41	8.51		8.05	2.58	0.78	3.44	0.58	4.14	0.88	2.56	0.38	2.52	0.4	22.67	0.26	1.20342	Kappvaal Craton	[12764] Hofmann and Harris, 2008
B-2	AU821	53.0272	6.40359	13.008	11.2656	13.7262	0.335991	1.34396	0.217406	0.612689	0.0592925		100	71.0913	258.883		3676.13		2024		374	5.8	45	21	44		1.6		4.74	10.1	1.43	6.5	1.86	0.61	2.21	0.38	2.33		1.31		1.01		14		0.325244	Kappvaal Craton	[5321] Riganti and Wilson, 1995
B-2	H02	52.226	13.7176	10.8253	9.68908	9.89567	0.981304	1.78701	0.165272	0.588782	0.123954	2.32	100	68.0548	541.208	18	3532.69	104	669	53	360	33	214	197	90		4.6		12.34	24.17	3.08	12.73	2.79	0.89	2.94	0.6	2.11	0.72	2.1	0.3	2.23	0.33	18.94	1.97	0.359178	Kappvaal Craton	[16588] Mare and Fourie, 2012
B-2	H26	52.6029	12.7034	9.23978	7.63878	13.9277	1.41265	1.84168	0.166379	0.366243	0.100455	3.23	100	77.8413	438.607	21	2197.46		1326	50	454	39	239	236	51		5.9		14.93	27.21	3.19	11.74	2.09	0.48	2.08	0.34	2.51	0.57	1.78	0.32	2.11	0.32	15.34	1.66	0.380767	Kappvaal Craton	[16588] Mare and Fourie, 2012
B-2	D17	52.1017	14.4229	9.82118	9.60499	10.6653	0.926526	1.87364	0.168834	0.339726	0.0751516	2.28	100	71.6779	328.127	30	2038.36	138	1349	52	392	32	158	112	49		3.1		7.14	14.2	1.79	7.2	1.49	0.49	1.74	0.31	2.48	0.57	1.76	0.31	2.15	0.33	14.97	0.69	0.418341	Kappvaal Craton	[16588] Mare and Fourie, 2012
B-2	H01	53.3699	12.7657	13.1071	8.85533	7.92427	0.693115	1.95521	0.201728	0.962086	0.16552	2.39	100	58.4885	722.693	24	5772.51	197	457	55	160	42	394	183	117	3.2	5.1		14.43	30.14	3.99	17.58	4.29	1.39	4.53	0.76	3.49	0.99	2.67	0.39	2.59	0.38	25.57	1.65	0.340542	Kappvaal Craton	[16588] Mare and Fourie, 2012
B-2	H08	53.389	15.2599	9.10004	8.53064	8.88263	1.20092	2.98158	0.137691	0.403756	0.11388	3.01	100	69.464	497.222	17	2422.54	94	669	50	391	35	248	290			5.2		17.86	34.21	4.14	15.3	2.9	0.76	2.84	0.41	2.75	0.65	1.91	0.29	2.27	0.32	17.54	3.11	0.280536	Kappvaal Craton	[16588] Mare and Fourie, 2012
B-2	D27	52.6515	13.7855	10.8849	8.83504	9.33727	1.10694	2.34713	0.167066	0.717463	0.167066	2.22	100	66.6571	729.445	21	4304.78		752	50	317	27	224	314	104		6		15.38	30.53	3.81	15.68	3.2	0.99	3.36	0.69	1.8	0.83	2.45	0.4	2.61	0.37	22.14	1.55	0.375891	Kappvaal Craton	[16588] Mare and Fourie, 2012
B-2	D14	51.5592	15.613	8.37189	9.03583	11.0069	2.16818	1.73247	0.16806	0.2801	0.0643194	3.02	100	75.3938	280.831	18	1680.6	100	1139	51	320	75	139	352			3		8.34	16.08	1.94	7.72	1.5	0.43	1.57	0.3	5.22	0.47	1.46	0.25	1.69	0.26	12.06	1.39	0.346595	Kappvaal Craton	[16588] Mare and Fourie, 2012
B-2	D33	53.8733	13.6091	8.59147	9.30828	10.9365	1.14689	2.00707	0.14029	0.307204	0.079873	1.97	100	74.7895	348.741	23	1843.22	114	1076	45	392	39	167	151			6		12.53	24.03	2.86	11.1	2.14	0.56	2.1	0.36	2.74	0.54	1.67	0.26	1.9	0.27	14.02	2.49	0.461389	Kappvaal Craton	[16588] Mare and Fourie, 2012
B-2	D9	51.9627	13.6139	10.2562	9.35064	11.1618	0.885208	2.01461	0.155674	0.488391	0.110905	1.46	100	71.7216	484.235	19	2930.34		937	52	359	21	221	204			4.2		16.22	35.88	4.92	22.01	4.77	1.47	4.29	0.74	7.56	0.76	1.96	0.3	1.88	0.26	18.39	1.83	0.249497	Kappvaal Craton	[16588] Mare and Fourie, 2012
B-2	D35	52.5557	11.5996	9.66113	8.87332	14.2222	0.642694	1.89698	0.184515	0.290249	0.0735988	3.19	100	77.4304	321.347	21	1741.49	106	1706	49	526	19	110	136	57		5		10.16	19.71	2.36	9.13	1.71	0.42	1.72	0.25	2.7	0.45	1.43	0.24	1.6	0.26	12.65	2.03	0.47418	Kappvaal Craton	[16588] Mare and Fourie, 2012
B-2	H22	52.5324	12.7005	8.31247	9.08501	14.6473	0.906441	1.36996	0.143176	0.236911	0.065923	1.81	100	80.4172	287.833	23	1421.46	102	1489	52	541	31	168	155	46		4.6		9.02	17.49	2.09	8.05	1.56	0.43	1.51	0.35	2.71	0.4	1.21	0.2	1.38	0.21	10.62	1.6	0.491381	Kappvaal Craton	[16588] Mare and Fourie, 2012
B-2	H18	53.3633	12.1266	8.23062	7.92772	14.6752	1.54585	1.69208	0.132651	0.240234	0.0658032	3.13	100	80.6024	287.31	22	1441.4	101	1330	53	607	57	199	173	47	3.4	3.7		12.8	24.1	2.79	10.53	1.98	0.55	2.04	0.32	3.7	0.53	1.71	0.26	1.9	0.29	14.54	3.17	0.278522	Kappvaal Craton	[16588] Mare and Fourie, 2012
B-2	D24	52.4883	13.0755	10.0628	8.99651	11.916	1.26303	1.5322	0.152185	0.414109	0.0993861	2.96	100	73.402	433.939	19	2484.65		1182	53	475	38	199	316			6		14.17	27.49	3.27	12.49	2.37	0.62	2.33	0.4	3.25	0.6	1.75	0.28	1.98	0.3	15.63	2.22	0.407989	Kappvaal Craton	[16588] Mare and Fourie, 2012
B-2	H10	53.0266	12.7915	8.72389	7.32597	13.9898	1.66069	1.90244	0.143997	0.346854	0.08829	3.69	100	78.8906	385.492	19	2081.12	94	1433	52	552	39	188	317	80	3.1	7.1		19.8	37.48	4.31	15.74	2.89	0.68	2.65	0.43	4.01	0.6	1.71	0.26	1.9	0.29	15.59	4.25	0.34551	Kappvaal Craton	[16588] Mare and Fourie, 2012
B-2	HOG2	53.9864	10.7171	11.4183	8.61378	12.0192		2.64423	0.170272	0.430689		3.4	100	71.041		39	2584.13		905	53.1	148	0.76	78.9	9.49	22.5	0.672	0.902	0.0589	1.27	3.5	0.552	2.86	1.01	0.456	1.48	0.267	1.93	0.435	1.31		1.31	0.194	11.5	0.0882	0.684337	Kappvaal Craton	[16702] Robin-Popieul et al., 2012
B-2	AU824	51.8053	8.17254	13.815	9.63614	13.1527	0.147342	2.15119	0.225924	0.805467	0.0884049		100	68.9322	385.993		4832.8		1203		102	0.5	62	22	63		2.4		4.51	11.3	1.6	7.76	2.49	0.85	3.01	0.5	3.21		1.85		1.66		19		0.512746	Kappvaal Craton	[5321] Riganti and Wilson, 1995
B-2	MC 8-3	53.1091	11.4208	11.264	8.1577	11.7669	0.0889931	3.70805	0.0889931	0.365861	0.0296644		100	70.8841	129.52	17.9	2195.16		788		138	2.9	3	2	7	0.22	0.25	0.02	0.34	0.89	0.13	0.74	0.31	0.11	0.48	0.09	0.68	0.15	0.43	0.07	0.43	0.07	3.93	0.03	0.708481	Kappvaal Craton	[16344] Stiegler et al., 2012
B-2	SA 442-2	53.812	9.65779	10.9923	9.4247	12.4649	0.0608045	3.03009	0.17228	0.354693	0.0304023	2.2	100	72.5479	132.742	34.5	2128.16	222	902		168	2	96	27	16	0.51	0.54	0.04	0.77	2.2	0.35	1.9	0.74	0.29	1.1	0.23	1.6	0.38	1.05	0.16	1.05	0.17	9.1	0.05	0.675725	Kappvaal Craton	[22846] Huber and Byerly, 2019
B-2	KL-142	50.968	13.4595	12.0595	10.5496	8.32967	0.679973	3.07988	0.179993	0.629975	0.0639974	2.69	100	61.6815	279.425	32.9	3779.85	224	475	71	221	20	208	206	56	1.51	1.8	0.13	6.5	13.5		6.3	1.91	0.62		0.35					1.32	0.24	17.4	0.93	0.266825	Kappvaal Craton	[5846] Marsh et al., 1992
B-2	KL-138	51.8216	15.1305	11.9404	8.46025	6.84021	1.46004	3.3701	0.200006	0.690021	0.0870026	2.94	100	57.1746	379.871	26.7	4140.12	197	215	67	166	43	173	644	71	1.92	2.2	0.22	9	18.5		8.9	2.23	0.82		0.42					1.45	0.25	18.4	1.41	0.235531	Kappvaal Craton	[5846] Marsh et al., 1992
B-2	BBS 16	53.5932	14.4133	11.7743	5.07511	5.79578	0.182704	0.619164	7.50102	0.842469	0.203004	2.34	100	53.427	886.358	23	5054.81	247	636	43	202	24	203	362	103	2	3.7	0.16	10	26			3.5	1		0.52					1.3	0.2	21	0.6	0.356508	Kappvaal Craton	[11105] Crow and Condie, 1987
B-2	KO-126	51.8684	15.2695	12.8696	8.23975	5.46984	1.84994	3.2199	0.159995	0.929972	0.122996	1.98	100	49.7616	537.026	23.2	5579.83	209	26	63	133	66	247	453	96	2.57	4.5	0.29	12	25.6		11.7	3.11	1.27		0.54					1.69	0.3	21.6	1.86	0.361325	Kappvaal Craton	[5846] Marsh et al., 1992
B-2	KO-111	52.4642	15.5858	14.5026	5.67669	5.50619	0.952801	3.9115	0.170501	1.10324	0.126372	2.11	100	46.9444	551.763	28.3	6619.46	258	72	79	163	34	282	278	109	2.85	5.4	0.41	13.2	28.7		14.1	3.62	1.06		0.59					1.76	0.32	24.8	2.27	0.394173	Kappvaal Craton	[5846] Marsh et al., 1992
B-2	SA356-12	53.0181	15.1749	10.1761	4.78113	9.64146	1.82138	4.31589	0.195007	0.555324	0.320722		100	68.8286	1400.34	12.4	3331.95		138		89	34.6	438	1227	151	3.93	6.51	0.4	21.23	47.79	5.85	25.68	6.69	2.12	6.18	0.89	4.87	0.87	2.11	0.27	1.53	0.23	24.62	6.52	0.29546	Kappvaal Craton	[12560] Stiegler et al., 2008
B-2	SA159-2	51.0742	15.8021	16.5673	6.48998	7.16848	1.18	0.1475	0.247799	1.22916	0.0934164		100	50.2086	407.874	40.8	7374.98		148		102	41.7	277	49	59	1.76	2.89	0.19	3.76	10.41	1.69	8.97	2.95	1.42	3.94	0.73	4.98	1.09	3.02	0.44	2.89	0.45	26.74	0.33	0.740589	Kappvaal Craton	[12560] Stiegler et al., 2008
B-2	MC 7-1	48.197	12.928	7.0514	20.0573	10.9223		0.248234	0.139011	0.417032	0.0397174		100	78.3072	173.414	10.2	2502.19		207		137	0.9	4	4	4	0.12	0.24	0.02	0.4	0.86	0.11	0.56	0.21	0.07	0.28	0.05	0.36	0.08	0.23	0.03	0.22	0.03	2.07	0.07	0.578121	Kappvaal Craton	[16344] Stiegler et al., 2012
HMA	SA 355-3	55.1051	10.483	11.0129	10.7402	9.43473	0.029669	2.3933	0.178014	0.56371	0.0593379		100	66.6281	259.081	38.4	3382.26		549		116	0.6	227	21	34	1.03	1.63	0.12	2.63	5.92	0.89	4.59	1.66	0.65	2.34	0.45	3.04	0.67	1.89	0.27	1.64	0.27	19.56	0.29	0.597171	Kappvaal Craton	[16344] Stiegler et al., 2012
HMA	SA 355-4	55.9078	10.6609	10.1099	7.06767	11.532	0.0890883	3.98918	0.178177	0.415745	0.0494935		100	72.665	216.098	36.1	2494.47		755		158	1.2	24	31	32	0.92	1.44	0.09	2.71	6.18	0.81	3.91	1.26	0.41	1.62	0.3	2.04	0.45	1.24	0.18	1.15	0.19	11.83	0.4	0.511989	Kappvaal Craton	[16344] Stiegler et al., 2012
HMA	HOG1	55.7167	10.3031	10.2031	9.50285	10.4031	0.310093	2.97089	0.180054	0.410123		3.7	100	70.3809	0	40.4	2460.74	217	797	55	125	0.764	69.3	14.9	22.4	0.681	0.895	0.0613	1.2	3.28	0.526	2.81	0.937	0.414	1.41	0.254	1.8	0.41	1.24		1.24	0.186	10.5	0.0876	0.718636	Kappvaal Craton	[16702] Robin-Popieul et al., 2012
HMA	HOG3	54.0378	10.3072	11.5081	8.70609	11.3079	0.070049	3.44241	0.20014	0.420294		2.9	100	69.6046	0	31.9	2521.77	194	1060	63.1	352	0.563	45.1	9.25	38.3	1.07	2.05	0.137	3.17	7.94	1.23	6.12	1.86	0.72	2.28	0.382	2.45	0.504	1.42		1.29	0.19	12.9	0.248	0.623106	Kappvaal Craton	[16702] Robin-Popieul et al., 2012
HMA	BD7	54.0297	6.61588	12.4298	10.6255	12.4298		2.84683	0.210505	0.611468	0.200481	1.1	100	69.9745	875.34	32.1	3668.81	202	678		209	2	66	21	30	0.88	1.4	0.1	2.1	5.6	0.91	4.7	1.5	0.62	2	0.35	2.2	0.47	1.3	0.18	1.1	0.17	11	0.18	0.642356	Kappvaal Craton	[22846] Huber and Byerly, 2019
HMA	D5	54.7482	9.99024	11.7789	9.86829	9.13655	0.589455	2.78467	0.169722	0.813041	0.12094	1.3	100	64.3836	528.047	18	4878.25		577	59	290	19	372	419	65		5		18.61	37.35	4.91	20.25	3.94	1.21	3.35	0.56	2.7	0.49	1.31	0.18	1.19	0.17	12.27	1.57	0.258875	Kappvaal Craton	[16588] Mare and Fourie, 2012
HMA	D1	57.8858	13.3162	9.96179	7.8235	5.09744	1.25663	3.45572	0.134783	0.881664	0.186467	1.07	100	54.3903	814.152	16	5289.99	160	161	43	117	36	395	385	140	3.5	7.4		22.94	46.34	6.05	25.07	4.87	1.46	4.5	0.8	4.09	0.78	2.1	0.31	1.98	0.28	19.73	2.23	0.310818	Kappvaal Craton	[16588] Mare and Fourie, 2012
HMA	H05	57.1591	14.0552	7.30085	9.63135	5.51689	1.8149	3.64011	0.128899	0.58778	0.164991	1.74	100	63.7818	720.383	17	3526.68	123	168	28	107	39	354	420	107	3.4	5.9		26.73	50.96	6.22	23.73	4.5	1.2	4.6	0.77	4.98	1.12	3.34	0.51	3.61	0.55	29.33	4.6	0.212677	Kappvaal Craton	[16588] Mare and Fourie, 2012
HMA	D23	54.8648	12.8875	8.97375	7.91012	11.132	1.59028	2.00335	0.142506	0.392408	0.103265	2.69	100	74.2997	450.876	20	2354.45	126	1064	47	461	53	198	306	78		5.4		13.69	26.54	3.27	12.55	2.39	0.66	2.4	0.44	3.94	0.62	1.88	0.31	2.2	0.32	16.68	2.84	0.380065	Kappvaal Craton	[16588] Mare and Fourie, 2012
HMA	H13	54.0847	14.5392	9.05057	7.33211	9.23804	2.18714	2.80162	0.133311	0.499917	0.133311	2.85	100	70.4035	582.063	27	2999.5	174	417	45	158	100	343	420	55		5.1		24.61	55.95	8.06	37.17	8.42	3.08	7.79	1.35	2.85	1.23	3.1	0.44	2.73	0.38	29.57	3.56	0.199676	Kappvaal Craton	[16588] Mare and Fourie, 2012
HMA	H07	60.682	13.2294	7.33133	6.85701	8.24904	1.19611	1.95915	0.124767	0.299028	0.0721791	2.35	100	72.3926	315.148	14	1794.17	75	1040	38	297	33	258	190	69		2.2		11.89	22.81	2.74	10.25	1.9	0.59	1.92	0.27	2.95	0.46	1.4	0.21	1.56	0.24	12.18	1.99	0.178282	Kappvaal Craton	[16588] Mare and Fourie, 2012
HMA	D2	56.4668	11.6291	10.6179	8.79765	7.32127	1.05167	2.96289	0.14865	0.839316	0.16483	1.02	100	61.6408	719.679	19	5035.9	163	403	48	182	35	328	256	117	3.6	5.9		18.09	38.26	5	21.07	4.42	1.28	3.98	0.68	3.71	0.72	1.9	0.29	1.84	0.25	17.85	1.77	0.314254	Kappvaal Craton	[16588] Mare and Fourie, 2012
HMA	D36	54.8348	13.0764	8.99065	7.86426	10.926	1.49503	2.19134	0.139263	0.378877	0.103423	2.04	100	73.9051	451.566	22	2273.26		1155	45	410	45	176	223	81		7		15.7	30.67	3.68	13.8	2.55	0.62	2.43	0.42	2.99	0.6	1.84	0.31	2.09	0.33	16.53	3.07	0.429601	Kappvaal Craton	[16588] Mare and Fourie, 2012
HMA	D37	55.1195	13.9794	8.69877	8.22801	9.35373	1.62718	2.34355	0.13918	0.39912	0.111549	1.91	100	71.4772	487.044	21	2394.72	107	848	43	346	48	201	248	86	3.8	7		16.82	32.44	3.84	14.51	2.65	0.68	2.6	0.45	2.08	0.66	1.98	0.33	2.23	0.34	17.17	3.2	0.400995	Kappvaal Craton	[16588] Mare and Fourie, 2012
HMA	H03A	63.1242	13.6748	6.15419	6.6679	5.28089	2.3014	2.32195	0.104796	0.277401	0.092467	1.92	100	66.6644	403.729	16	1664.41	68	291	26	110	57	238	340	118	3.5	5.8		30.69	57.13	6.51	22.99	4.01	0.73	3.62	0.5	1.41	0.62	1.85	0.26	1.89	0.29	16.69	6.54	0.182095	Kappvaal Craton	[16588] Mare and Fourie, 2012
HMA	H191	54.1828	14.9848	8.02976	8.62915	9.06319	1.63282	2.85227	0.121945	0.392704	0.110577	2.18	100	72.4551	482.802	20	2356.22	104	680	40	298	49	201	243	82		7.1		16.39	32.15	3.85	14.27	2.6	0.72	2.71	0.42	2.81	0.66	1.93	0.28	2.17	0.33	16.39	3.25	0.417394	Kappvaal Craton	[16588] Mare and Fourie, 2012
HMA	H19	54.2359	15.2358	7.93169	8.80613	8.87814	1.67687	2.60275	0.13168	0.390926	0.110077	1.82	100	72.2883	480.616	21	2345.56	104	673	41	296	50	208	247	85		7.3		20.91	40.74	4.84	17.87	3.33	0.87	3.37	0.73	2.96	0.8	2.32	0.37	2.6	0.4	20.47	4	0.336385	Kappvaal Craton	[16588] Mare and Fourie, 2012
HMA	H20	58.8703	13.0192	9.08556	7.30975	6.49411	1.68289	2.76697	0.133186	0.526549	0.111505	2.1	100	62.4875	486.851	18	3159.3	121	497	37	178	42	185	273	110		7		21.26	40.22	4.6	17.62	3.32	0.85	3.21	0.57	2.39	0.68	2.01	0.33	2.11	0.3	18.83	4.61	0.31725	Kappvaal Craton	[16588] Mare and Fourie, 2012
HMA	VS15	60.148	13.8951	10.282	4.84615	5.28573	1.56535	2.49812	0.171545	1.12576	0.182267	5.89	100	54.5053	795.812	27.2	6754.58	202.69	117.59	39.78	71.72	50.45	171.81	501.8	145.07	2.64	6.47	0.43	28.22	56.99	6.92	23.21	5.84	1.43	6.65	1.11	6.03	1.24	3.48	0.48	2.9	0.43	33.3	4.26	0.22091	Kappvaal Craton	[16447] Altermann and Lenharrdt, 2012
HMA	D19B	54.5767	15.6611	7.75841	6.06866	8.02629	1.02003	4.80135	0.117458	1.05094	0.919057	2.65	100	70.6828	4012.78	16	6305.64	110	270	33	177	31	702	266	167		7		36.18	81.76	11.05	47.82	8.89	2.26	6.74	0.93	4.07	0.69	1.65	0.23	1.42	0.2	17.23	1.78	0.186422	Kappvaal Craton	[16588] Mare and Fourie, 2012
HMA	KL-131	54.1011	13.7903	11.5102	7.12014	6.62013	2.09004	3.72007	0.180004	0.770015	0.098002	1.79	100	57.2721	427.896	25	4620.09	193	272	64	172	75	64	328	86	2.34	3.2	0.28	10.1	20.5		10.3	2.67	0.73		0.47					1.52	0.27	19.1	1.55	0.305278	Kappvaal Craton	[5846] Marsh et al., 1992
HMA	KO-110	54.3054	14.7715	13.2213	6.49065	5.19052	0.790079	3.91039	0.150015	1.05011	0.120012	2	100	47.7786	523.996	25.8	6300.63	239	79	74	160	28	369	249	104	2.86	5.6	0.37	12.4	28.5		14.1	3.47	1.12		0.59					1.79	0.27	23.4	2.16	0.435145	Kappvaal Craton	[5846] Marsh et al., 1992
HMA	BBS 9	54.8154	15.5598	9.35625	5.07475	5.13577	0.152548	1.14919	8.07485	0.549171	0.132208	2.43	100	56.1258	577.246	23	3295.03	187	556	47	276	49	236	490	82	1.9	3.5	0.17	8.3	20			2.6	0.58		0.37					1.1	0.17	15	2.1	0.40631	Kappvaal Craton	[11105] Crow and Condie, 1987
HMA	BSF 11	54.2028	15.079	12.1243	4.30973	6.01121	0.173204	1.243	5.27764	1.20224	0.376974	2.13	100	53.6061	1645.94	19	7213.45	262	22	39	119	48	503	770	189	3.6	6.3	0.28	19	47			5.9	1.5		0.8					1.7	0.27	26		0.319488	Kappvaal Craton	[11105] Crow and Condie, 1987
HMA	BSF 2	56.0093	14.851	13.2598	4.16888	5.78127	0.169725	0.625862	3.6597	1.19868	0.275804	5.62	100	50.3992	1204.21	26	7192.11	322	10	50	24	33	246	198	193	4.9	5	0.28	30	67			6.2	2		0.77					2.4	0.35	27	4.4	0.160589	Kappvaal Craton	[11105] Crow and Condie, 1987
ADK	69-PTP-03	51.7317	5.79644	11.3851	11.2812	18.3866	0.0405127	0.529782	0.245154	0.567178	0.0363576		100	79.0078	158.744	21.3	3403.07	163	1782	54.4	901		6	22	33	0.89		0.13	3.74	7.61	1.07	6.17	1.82	0.44	2.61	0.36	1.98	0.39	1.3	0.16	0.84	0.14	9	0.68		Karelia Craton	[17129] Maier et al., 2013
ADK	9015A	48.7468	11.0545	13.4065	4.84792	18.877	0.864597	1.08075	0.154392	0.916061	0.0514641	2.4	100	76.6435	224.702		5496.37	275	455	35	142				39		1.55		2.985	7.387	1.089	5.487	1.62	0.51	1.85	0.36	2.36	0.51	1.53	0.22	1.39	0.23	20		0.500328	Karelia Craton	[21962] Vrevskii, 2018
ADK	9013B	48.3077	5.19825	11.6915	6.62906	27.3603	0.0205871	0.216165	0.174991	0.370568	0.0308807	3.6	100	84.5053	134.831		2223.41	156	1975	73	884						1.98		1.257	3.124	0.436	2.287	0.653	0.231	0.812	0.132	0.917	0.203	0.573	0.081	0.519	0.07	10		1.51774	Karelia Craton	[21962] Vrevskii, 2018
ADK	9013 A/1	50.2765	4.14726	11.3899	4.50067	28.7086	0.0831532	0.280642	0.187095	0.394978	0.0311824	4.2	100	85.4527	136.149		2369.87	89	2263	74.8	1012				24.8		1.53		1.216	3.612	0.592	3.112	1.349	0.422	2.151	0.381	2.723	0.542	1.574	0.267	1.638	0.213	8.5		1.21234	Karelia Craton	[21962] Vrevskii, 2018
ADK	9016	48.6894	4.86487	14.8851	2.59528	28.1816	0.0101776	0.203551	0.152663	0.366392	0.0508878	3.2	100	81.5235	222.186		2198.35	96	1880	78	1460				21.1		1.21		0.62	1.88	0.29	1.73	0.72	0.22	0.89	0.16	1	0.22	0.67	0.11	0.68	0.1	6.4		1.88045	Karelia Craton	[21962] Vrevskii, 2018
ADK	U4	50.0905	7.09113	10.7021	9.55542	21.6858	0.0100583	0.110642	0.201167	0.502917	0.0502917	4.15	100	82.5246	219.583		3017.5		1401		827	2	6		39				1.19	3.81		3.56	1.36	0.43	1.99		2.5		1.63		1.57	0.25	9			Karelia Craton	[5349] Gruau et al., 1992
AUK	7B-PTP-03	47.681	8.78952	12.5976	8.67432	21.2271	0.0298673	0.266672	0.216538	0.490677	0.0266672		100	79.7034	116.434	34.1	2944.06			83.7	887	0.66	8.6	3.87		0.93	0.83	0.03	1.8	3.8		3.29	1.25	0.38	1.72	0.3	2.26	0.4	1.35	0.17	1.56	0.16	12.3	0.12	0.444296	Karelia Craton	[17129] Maier et al., 2013
AUK	2B2-PTP-03	47.5374	8.56967	11.5232	7.33327	24.146	0.0377281	0.215589	0.224213	0.394528	0.0183251		100	83.0029	80.0109	29.3	2367.17			82.5	1107	2.05	14	3.91		0.58	0.68	0.01	1.06	2.38		2.13	1.07	0.33	1.09	0.22	1.48	0.29	0.88	0.14	0.89	0.14	8.8	0.08	0.618116	Karelia Craton	[17129] Maier et al., 2013
AUK	7F-PTP-03	47.9081	8.55041	12.4067	8.77276	21.376	0.0225576	0.236318	0.216983	0.47371	0.0365218		100	80.0611	159.462	28.6	2842.26			86.5	835	0.36	8.8	4.93		0.79	0.7	0.04	1.26	3.09	0.56	2.87	1.06	0.34	1.36	0.31	2.05	0.39	1.31	0.22	1.27	0.21	11.7	0.08	0.535297	Karelia Craton	[17129] Maier et al., 2013
AUK	2G-PTP-03	47.4606	8.78821	12.3824	8.56637	21.8639	0.018131	0.277298	0.195175	0.422346	0.0255967		100	80.4497	111.76	30.4	2534.08			124	949	0.19	6.6	1.06		0.54	0.77	0.02	1	2.52	0.45	2.58	0.94	0.21	1.33	0.23	1.51	0.35	0.93	0.2	1.06	0.18	10.8	0.06	0.741921	Karelia Craton	[17129] Maier et al., 2013
AUK	99011-817	48.2518	5.8154	11.0404	7.93882	26.3987	0.0106705		0.160057	0.352125	0.0320114		100	84.7849	139.768	21.8	2112.75	99			1300		8	17	23				2.7	5.3	0.72	3.35	0.95		1.27	0.23	1.47	0.28	0.89	0.12	0.89	0.14	8.01	0.54		Karelia Craton	[18043] Konnunaho et al., 2013
AUK	5	47.3734	8.03292	11.1345	4.79592	28.1798	0.00695061		0.148942	0.297883	0.0297883		100	85.5034	130.062	18	1787.3	131	2668	100	1240	0.4	3	6	11		1		0.7	2.1	0.4	1.9	0.7	0.2	1.2	0.2	1.4	0.3	0.9	0.1	0.9	0.1	7.4		1.37648	Karelia Craton	[13590] Papunen et al., 2009
AUK	2H-PTP-03	47.5443	8.64344	12.6927	8.71609	21.3682	0.0213682	0.341891	0.204066	0.442322	0.0256418		100	79.6888	111.957	33.2	2653.93			74.8	836	0.18	7.33	1.4		0.68	0.82	0.04	0.85	2.49	0.46	2.11	0.86	0.34	1.41	0.23	1.74	0.36	1.05	0.13	0.95	0.13	9.64	0.1	0.929527	Karelia Craton	[17129] Maier et al., 2013
AUK	15594	46.159	7.57179	12.4506	5.89582	27.1248	0.019952	0.19952	0.139664	0.389064	0.04988	0.55	100	83.5451	217.786		2334.38	123	2493	71	1022				28.3		0.98		2.71	5.881	0.796	3.19	0.856	0.279	0.96	0.168	1.06	0.21	0.61	0.095	0.586	0.088	9.6		0.348437	Karelia Craton	[21962] Vrevskii, 2018
AUK	2J-PTP-03	46.0373	8.90629	11.5416	6.37101	26.3532	0.0107564	0.161346	0.181783	0.423802	0.0129077		100	84.1804	56.3574	31.3	2542.81			78.3	1059	0.24	15.2	1.49		0.83	0.77	0.05	1.03	2.47	0.36	1.83	0.73	0.24	0.79	0.2	1.42	0.29	0.81	0.13	0.93	0.13	8.04	0.04	0.720312	Karelia Craton	[17129] Maier et al., 2013
AUK	53-PTP-03	47.2252	7.87087	12.1621	7.66709	24.3674	0.0226422	0.0539101	0.236126	0.375214	0.0194076		100	82.361	84.7376	23.7	2251.29			55.5	1208	0.54	5.05	3.11		0.46	0.6	0.05	0.57	1.66	0.29	1.83	0.81	0.22	1.09	0.21	1.45	0.31	0.77	0.12	0.78	0.11	7.83	0.1	1.01425	Karelia Craton	[17129] Maier et al., 2013
AUK	9014 A/2-2	45.927	6.40043	13.0582	6.99365	26.6321	0.104072	0.239366	0.291402	0.353845		4.68	100	82.6179	0		2123.07	157	2798	84	1361				12		1		0.85	2.18	0.33	1.56	0.47	0.15	0.49	0.09	0.58	0.12	0.34	0.05	0.31	0.046	8		1.13357	Karelia Craton	[21962] Vrevskii, 2018
AUK	2F-PTP-03	49.3851	7.35976	10.5117	8.90105	23.1459	0.0127996	0.127996	0.183461	0.353055	0.0191994		100	83.691	83.8283	26	2118.33			68.6	1010	0.38	7.69	1.94		0.34	0.95	0.02	0.52	1.69	0.32	1.97	0.58	0.21	1.04	0.18	1.12	0.27	0.76	0.13	0.69	0.12	7.49	0.1	1.7603	Karelia Craton	[17129] Maier et al., 2013
AUK	64-PTP-03	45.4089	5.95992	11.7561	5.5102	30.8911	0.00982404		0.147361	0.297996	0.0185565		100	85.9625	81.0214	18.2	1787.98	103	3898	86.9	1431	4	154	84	14	0.53		0.08	1.21	3.35	0.54	2.73	0.99	0.18	1.49	0.27	1.65	0.32	0.79	0.12	0.95	0.13	9	0.2		Karelia Craton	[17129] Maier et al., 2013
AUK	TIPASJVI1	47.4421	7.45214	10.7107	7.16429	26.6529	0.0191901		0.204694	0.330496	0.0234545		100	85.2925	102.407	25.1	1982.97	123	2647	94.1	1256	0.41	7.7	21	16	0.07	0.84	0.02	0.66	2.13	0.39	1.79	0.64	0.17	1.03	0.16	1.21	0.23	0.82	0.13	0.58	0.12	7.43	0.05	1.22632	Karelia Craton	[17129] Maier et al., 2013
AUK	9013	47.4659	6.04223	12.8031	5.0369	27.8927	0.0205169	0.205169	0.143618	0.338529	0.0512923	3.5	100	83.5451	223.952		2031.17	123	2493	71	1022				28.3		1.32		1.654	5.29	0.85	4.223	1.67	0.455	2.35	0.452	3.28	0.697	1.89	0.31	1.689	0.26	9.6		0.768963	Karelia Craton	[21962] Vrevskii, 2018
AUK	7D-PTP-03	46.4243	8.99335	13.0204	7.53584	23.2121	0.011876	0.0755744	0.17814	0.509587	0.0388668		100	80.6002	169.7	30.2	3057.52			86.8	815	0.37	10.1	2.43		0.77	3.81	0.31	1.42	4.2	0.62	3.07	1.18	0.39	1.68	0.32	1.93	0.43	1.15	0.17	1.27	0.2	12.5	0.17	2.58526	Karelia Craton	[17129] Maier et al., 2013
AUK	70-PTP-03	48.6465	7.0051	10.793	6.86565	26.161	0.00756724		0.175128	0.325391	0.0205397		100	84.9598	89.6802	25	1952.35	147	3917	82.3	1212	1	12	17	16	0.27		0.02	0.51	1.46		1.8	0.72	0.06	1.1	0.18	1.51	0.28	0.7	0.1	0.78	0.1	8	0.02		Karelia Craton	[17129] Maier et al., 2013
AUK	TULPPIO1	45.0183	4.24022	10.1481	3.6625	36.625	0.00672549		0.138434	0.152604	0.00806623		100	89.374	35.2187	17.3	915.626	77.4	4230	116	1970	0.29	27.4	26.7		0.05	0.24		0.37	1.35		1.09	0.3	0.14	0.65	0.12	0.82	0.16	0.54	0.07	0.42	0.06	4.9		0.624995	Karelia Craton	[17129] Maier et al., 2013
AUK	2A-PTP-03	48.8979	7.68243	10.871	8.81661	23.0045	0.0117697	0.117697	0.186176	0.384122	0.0278194		100	83.1413	121.465	23	2304.73			26.2	809	0.58	7.09	14		0.51	0.8	0.06	0.58	2.09		2.55	0.8	0.2	1.25	0.23	1.56	0.31	0.91	0.14	0.83	0.11	8.31	0.13	1.32901	Karelia Craton	[17129] Maier et al., 2013
AUK	91156	45.5772	9.46527	13.993	7.5962	22.089	0.05997	0.3998	0.17991	0.569715	0.069965	5.7	100	78.6273	305.481	33.8	3418.29	234	3711	110	1007	1.3	16.9		28.5		0.937		0.65	2.33		2.7	1.072	0.353	1.62		1.97		1.21		1.12		11.7	0.0613	1.38897	Karelia Craton	[5231] Puchtel et al., 1998
AUK	91154	45.6817	6.17753	11.8952	5.66773	29.988	0.019992	0.009996	0.169932	0.339864	0.04998	8.35	100	85.455	218.223		2039.18	153	3220	103	1454	0.65	24.9		20.6				0.432	1.43		1.67	0.694	0.22	1		1.24		0.762		0.716		8			Karelia Craton	[5231] Puchtel et al., 1998
AUK	91155	45.0865	7.0079	14.0958	5.92822	27.1918	0.039988	0.019994	0.159952	0.409877	0.059982	6.3	100	81.804	261.893	26.3	2459.26	202	3812	113	1167	1.3	13.8		24.5		0.768		0.505	1.66		1.87	0.811	0.27	1.21		1.51		0.904		0.834		9.57	0.0487	1.46534	Karelia Craton	[5231] Puchtel et al., 1998
AUK	9332	45.4318	6.44451	10.5074	6.66467	30.3212	0.020014	0.020014	0.170119	0.350245	0.070049	7.6	100	87.0553	305.848		2101.47	118	2859	104	1609	1.9	19.4		19.9				0.488	1.64		1.83	0.759	0.249	1.08		1.33		0.833		0.772		7.9			Karelia Craton	[5231] Puchtel et al., 1998
AUK	91157	45.9	5.93	11.3	5.28	31	0.02	0.01	0.16	0.34	0.06	7.68	100	86.4744	261.972		2040	139	2902	100	1606	1.3	14		19.4				0.466	1.58		1.76	0.723	0.239	1.04		1.27		0.798		0.75		7.54			Karelia Craton	[5231] Puchtel et al., 1998
AUK	94114	45.5228	6.97349	12.2061	6.31316	28.3142	0.02001	0.010005	0.170085	0.4002	0.070035	7.21	100	84.3896	305.787		2401.2	155	2895	109	1456	2.1	20.4		21.4		0.635		0.661	2.16		2.19	0.845	0.312	1.22		1.49		0.921		0.853		8.4	0.0562	0.925634	Karelia Craton	[5231] Puchtel et al., 1998
AUK	94111	46.1446	7.14143	11.686	6.94167	27.3672	0.019976	0.0399521	0.159808	0.419497	0.0799041	6.39	100	84.5147	348.877	26.3	2516.98	183	3009	101	1401	0.72	19.2		23.4		0.665		0.681	2.17		2.24	0.87	0.317	1.062		1.59		0.97		0.9		9.58	0.0582	0.940896	Karelia Craton	[5231] Puchtel et al., 1998
AUK	94104	45.2728	7.11573	12.2926	6.76594	27.8833	0.019988	0.009994	0.179892	0.409754	0.04997	7.69	100	84.0923	218.179	26.5	2458.52	153	2946	98	1378	0.46	19.4		22.6		0.693		0.676	2.13		2.19	0.858	0.313	1.27		1.57		0.956		0.878		8.6	0.0564	0.987765	Karelia Craton	[5231] Puchtel et al., 1998
AUK	U3	45.6393	10.6529	13.8718	8.15813	20.3299	0.0301781	0.362137	0.211246	0.694095	0.0502968	4.76	100	77.3524	219.606		4164.57		2418		476	2	6		44				1.07	3.51		3.29	1.35	0.49	1.96		2.56		1.63		1.55	0.25	14			Karelia Craton	[5349] Gruau et al., 1992
AUK	9496	45.009	7.89158	13.8028	7.12142	25.4051	0.020004	0.010002	0.180036	0.490098	0.070014	5.65	100	81.0945	305.695	27.7	2940.59	171	2968	99	1103	0.44	19		24.3		0.762		0.772	2.46		2.48	0.963	0.416	1.4		1.71		1.05		0.972		10.6	0.0599	0.951053	Karelia Craton	[5231] Puchtel et al., 1998
AUK	L1	49.488	8.48394	11.3153	9.37751	19.8996	0.0301205	0.63253	0.210843	0.532129	0.0301205	3.66	100	80.3865	131.512		3192.77		1773		650	1	21		41				1.2	3.65		3.35	1.23	0.44	1.73		2.12		1.37		1.32	0.2	11			Karelia Craton	[5349] Gruau et al., 1992
AUK	2521057	47.4017	6.34331	10.877	7.75843	26.3233	0.118752	0.643237	0.168231	0.277087	0.0890636	6.13	100	84.9398	388.869		1662.52	138	3260	123	1561	3.7	34		19		0.8		0.89	2.34		1.75	0.596	0.238	0.84		1.06		0.694		0.689		6.4		0.866098	Karelia Craton	[5336] Puchtel et al., 1993
AUK	2521026	46.1314	6.22675	11.2219	6.26634	28.9064	0.0890949	0.653363	0.16829	0.257385	0.0791955	7.2	100	85.7207	345.783		1544.31	140	3168	128	1658	2.7	27		16		1		0.956	2.43		1.75	0.568	0.21	0.779		0.985		0.645		0.654		7.5		1.00788	Karelia Craton	[5336] Puchtel et al., 1993
AUK	116	47.5748	7.56076	10.411	7.55076	26.1526	0.010001	0.190019	0.150015	0.340034	0.060006	6.08	100	85.4105	261.998		2040.2	153	3437	89	1174		19		15				0.38	1.383		1.559	0.622	0.209	0.881		1.099		0.682		0.642	0.098				Karelia Craton	[9144] Blais et al., 1987
AUK	113	46.46	8.21	10.93	6.51	27.17	0.01	0.13	0.15	0.39	0.04	7.64	100	85.2794	174.648		2340	174	3588	90	1074		17		15				0.492	1.805		1.994	0.756	0.251	1.07		1.432		0.929		0.924	0.139				Karelia Craton	[9144] Blais et al., 1987
AUK	1HP 92-1	47.2572	8.02662	11.4927	7.92044	24.4408	0.0212344	0.286665	0.179431	0.350368	0.0244196		100	83.2105	106.621	26	2102.21	134	2745	85	1132		25	19	17				1		0.7	3.1	1.2	0.5	1.7	0.3	2.2	0.5	1.5	0.3	1.6	0.3	8	0.4		Karelia Craton	[13590] Papunen et al., 2009
AUK	89152	45.2918	6.91875	12.3978	5.84895	28.8948	0.0329941	0.010998	0.199964	0.359935	0.0439921	8.2	100	84.4517	192.078	28.8	2159.61	150	3223	117	1497	1.08	6.49	19.5	21.6	0.565	0.714	0.043	0.708	2.02		1.71	0.62	0.262	0.842		1.05		0.663		0.631		7.65	0.0536	0.9717	Karelia Craton	[6954] Puchtel et al., 1999
AUK	89153	45.9496	7.30789	12.7137	5.80627	27.5297	0.0220238	0.0110119	0.210227	0.375405	0.07408	9.25	100	83.4611	323.448	31.5	2252.43	159	3370	111	1396	1.09	3.28	29.5	22.5	0.597	0.765	0.045	0.764	2.17		1.83	0.659	0.271	0.902		1.11		0.707		0.675		8.16	0.0617	0.964796	Karelia Craton	[6954] Puchtel et al., 1999
AUK	8802/9B	45.683	6.13062	12.7475	6.19983	28.2799	0.138433	0.286755	0.158209	0.266978	0.108769	7.64	100	83.7929	474.907		1601.87	147	3435	105	1739	4.3	30		15		0.8		0.609	1.67		1.36	0.492	0.215	0.707		0.905		0.593		0.593		5.2		1.26573	Karelia Craton	[5336] Puchtel et al., 1993
AUK	8802/10B	45.9996	5.52194	11.6787	5.28401	30.7325	0.0892234	0.218102	0.178447	0.228015	0.069396	8.46	100	85.98	302.997		1368.09	122	3275	104	1797	3.3	22		12		1		0.58	1.58		1.28	0.453	0.187	0.662		0.827		0.543		0.541		6.9		1.66127	Karelia Craton	[5336] Puchtel et al., 1993
AUK	8804/3E	45.3832	5.51796	13.0952	5.37801	29.8889	0.0899667	0.119956	0.179933	0.256905	0.0899667	6.64	100	84.1753	392.812	25.5	1541.43		3205		1884				12.9	0.346	0.623	0.036	0.67	1.82		1.43	0.51	0.172	0.703		0.866		0.545		0.55		5.52	0.075	0.895943	Karelia Craton	[10680] Puchtel et al., 2007
AUK	8804/3B	45.2561	8.18168	12.7387	7.86548	24.4067	0.108694	0.7905	0.177863	0.345844	0.128456	5.77	100	81.7022	560.865		2075.06	180	3643	101	1257	1.6	40		19		1.1		0.878	2.36		1.83	0.643	0.275	0.922		1.16		0.754		0.74		8.5		1.20716	Karelia Craton	[5336] Puchtel et al., 1993
AUK	2521149	45.2023	6.79034	12.9006	6.77034	26.9013	0.100005	0.79004	0.160008	0.285014	0.100005	5.83	100	82.9344	436.642	29.3	1710.09		3517		1573				15.1	0.407	0.63	0.037	0.905	2.37		1.79	0.594	0.218	0.832		1.03		0.652		0.625		6.38	0.102	0.670748	Karelia Craton	[10680] Puchtel et al., 2007
B-1	12-HP-92	53.337	16.0308	10.1287	11.2809	5.27432	0.227597	2.6718	0.188015	0.82133	0.0395822		100	54.824	172.824	44	4927.98	267	410	81	161		119	60	15		2.5		2.8	7.2		6.4	2.5	0.9	3.4	0.7	4.5	0.9	2.8	0.5	2.9	0.5	20		0.860299	Karelia Craton	[13590] Papunen et al., 2009
B-1	5-HP-92	49.3586	15.696	12.507	12.8332	7.26559	0.148076	1.15499	0.217178	0.769994	0.0493586		100	57.5163	215.509	38	4619.96	236	267	76	172	1	73	23	15		2.5		3	7.2		6.6	2.5	1.1	3.6	0.7	4.6	1	2.9	0.5	3	0.5	19.5		0.802945	Karelia Craton	[13590] Papunen et al., 2009
B-1	7C-PTP-03	50.2507	11.3168	12.6769	7.41925	14.6392	0.0737149	2.73057	0.195189	0.652014	0.0456825		100	72.9088	199.459	40.9	3912.08			65.9	328	1.69	40.5	13.1		0.79	1.57	0.09	1.79	4.63	0.79	4.3	1.47	0.78	2.39	0.39	2.75	0.6	1.68	0.26	1.71	0.27	16.1	0.18	0.845111	Karelia Craton	[17129] Maier et al., 2013
B-1	2B1-PTP-03	50.3364	11.9898	12.4963	8.12722	13.0234	0.075453	3.12148	0.205687	0.592254	0.0320417		100	70.8354	139.9	45.3	3553.53			65.6	235	0.31	72.1	8.59		0.77	0.99	0.1	0.97	2.87	0.56	2.99	1.16	0.49	1.87	0.31	2.13	0.46	1.56	0.22	1.32	0.2	13.3	0.07	0.983401	Karelia Craton	[17129] Maier et al., 2013
B-1	2D-PTP-03	49.4054	11.7781	12.9142	8.17586	14.1754	0.0687923	2.66831	0.198038	0.583692	0.0323115		100	71.8951	141.078	43.8	3502.15			64.2	277	0.23	55	15		0.79	1.06	0.05	1.05	2.72	0.46	2.74	1.04	0.38	1.65	0.29	2.12	0.4	1.43	0.21	1.39	0.19	12.6	0.1	0.972711	Karelia Craton	[17129] Maier et al., 2013
B-1	2I-PTP-03	47.5077	10.0493	13.7045	9.06122	17.4862	0.0568828	1.39047	0.210677	0.506678	0.0263346		100	74.8338	114.982	35.8	3040.07			77.9	516	0.31	12.8	3.17		0.69	0.94	0.04	1.17	2.97	0.49	3.39	1.2	0.47	1.49	0.29	1.97	0.37	1.21	0.17	1.18	0.17	11.8	0.09	0.774122	Karelia Craton	[17129] Maier et al., 2013
B-1	2E-PTP-03	49.2652	11.5368	13.179	8.9436	13.3037	0.0997776	2.84782	0.199555	0.599705	0.0249444		100	70.172	108.912	45.6	3598.23			66.4	233	0.43	40.5	11		0.9	1.15	0.08	1.24	3.29	0.54	3.54	1.36	0.5	1.8	0.33	2.47	0.57	1.53	0.21	1.56	0.23	14	0.18	0.8936	Karelia Craton	[17129] Maier et al., 2013
B-1	SII-15/130.0	53.0491	15.5677	9.49917	10.6098	6.71295	0.257809	3.2127	0.237977	0.773427	0.0793258		100	62.2205	346.352	40	4640.56	286	608	68	200	7	135	106	17		3.5		4	11	1.8	8.6	2.7	1	4	0.6	4.4	0.9	2.5	0.4	2.4	0.4	23		0.843093	Karelia Craton	[13590] Papunen et al., 2009
B-1	M52/4412/02/R401/123.50-125.50	49.2477	15.4543	13.1053	10.5501	7.5211	0.317226	2.37996	0.198536	1.14362	0.0821036		100	57.2187	358.481	48.8	6861.71			51.2	134	6.45	91.4	42.7		1.37	2.58	0.18	3.21	8.99	1.49	7.78	2.75	0.84	3.42	0.6	4.65	1	2.94	0.41	2.66	0.38	28.7	0.28	0.774429	Karelia Craton	[17129] Maier et al., 2013
B-1	M52/4412/02/R402/40.00-42.00	49.0751	14.8463	15.2277	9.66657	7.05198	0.19929	2.37128	0.211972	1.2609	0.0888714		100	51.9059	388.03	44.8	7565.41			51	97	3.35	111	29.6		1.44	2.8	0.13	3.61	9.56	1.48	8.67	2.88	0.92	3.92	0.68	4.68	0.99	3.11	0.41	2.87	0.45	29.7	0.23	0.74734	Karelia Craton	[17129] Maier et al., 2013
B-1	E-7/6	49.7578	15.1797	12.3436	10.3149	8.09447	0.363343	2.73516	0.191764	0.857893	0.161486	0.71	100	60.4471	705.078		5147.36	234	370	50.9	170	13.33	120	75	51.7	1.57	2.23	0.168	2.73	7.42	1.16	6.56	2.23	0.83	2.81	0.43	3.18	0.64	1.82	0.3	2.14	0.35	19.3	0.2	0.787063	Karelia Craton	[5792] Bibikova et al., 1999
B-1	12-PTP-03	47.3854	11.088	12.5629	10.5022	16.5274	0.312765	0.815908	0.203977	0.564859	0.0366113		100	75.4054	159.852	32.9	3389.16			59.8	528	9.29	20.4	81.5		0.59	1.12	0.09	1.36	3.77	0.58	3.71	1.34	0.39	2.29	0.33	2.45	0.53	1.37	0.26	1.37	0.22	13	0.13	0.793499	Karelia Craton	[17129] Maier et al., 2013
B-1	43934	47.0401	12.2769	12.5503	12.3962	12.7044	0.318107	1.73965	0.268403	0.675978	0.0298225	0.5	100	70.2302	130.211		4055.87		138	42	459				35.1		1.85		1.658	5	0.835	3.8	1.327	0.438	2.048	0.398	3.074	0.693	1.981	0.325	1.987	0.306	16.2		1.07511	Karelia Craton	[21962] Vrevskii, 2018
B-1	7A-PTP-03	50.5704	12.408	12.189	7.7211	12.7208	0.0573478	3.40959	0.191855	0.687131	0.0448356		100	70.8639	195.761	44.4	4122.79			66.7	300	0.43	83.3	8.72		1.09	1.75	0.14	2.18	5.96	0.9	5.19	1.52	0.6	2.31	0.42	2.62	0.55	1.74	0.27	1.61	0.29	16.5	0.18	0.773479	Karelia Craton	[17129] Maier et al., 2013
B-1	9005	51.0251	12.2732	15.9407	9.78901	7.42309	0.14787	2.02089	0.226734	1.03509	0.118296	0.1	100	52.044	516.505		6210.55		48	55	100				46.8		1.98		2.513	7.5	1.191	5.748	2.149	0.679	2.698	0.548	3.636	0.894	2.654	0.408	2.767	0.394	35.4		0.759172	Karelia Craton	[21962] Vrevskii, 2018
B-1	81-PTP-03	49.1127	10.3543	12.863	11.2615	14.1812	0.0928032	1.18872	0.203333	0.698631	0.0437948		100	71.9835	191.217	43.3	4191.78	245	1162	69.7	318	1.5	56	41	37	0.5	1.26	0.08	1.28	4.17	0.71	3.76	1.27	0.53	2.03	0.36	2.41	0.51	1.41	0.19	1.25	0.19	14	0.27	0.948479	Karelia Craton	[17129] Maier et al., 2013
B-1	C-1775-13	50.522	14.445	12.4987	8.77851	9.59959	0.405474	2.64572	0.182463	0.760264	0.16219	0.86	100	64.1568	708.152		4561.58		531	48.3	148	10.43	126	49	59.6	1.38	2.15	0.144	2.68	8.12	1.24	6.27	1.94	0.61	2.47	0.46	3.14	0.73	1.83	0.33	2.03	0.33	21.2	0.2	0.772985	Karelia Craton	[5792] Bibikova et al., 1999
B-1	TIPASJVI2	47.9755	12.7727	12.1175	13.915	11.1112	0.149534	1.0592	0.240916	0.612675	0.045691		100	68.122	199.496	43.1	3676.05	231	840	75.8	273	5.48	145	25	33	0.55	1.3	0.05	1.59	5.24		4.85	1.33	0.55	1.86	0.31	2.17	0.48	1.57	0.21	1.44	0.23	11		0.787795	Karelia Craton	[17129] Maier et al., 2013
B-1	74-PTP-03	49.771	11.3308	11.8863	11.4367	13.7664	0.186376	0.868345	0.224499	0.49771	0.0317687		100	72.9666	138.708	45	2986.26	232	1165	90.1	317	7.2	76	45	25	0.27	0.72	0.05	0.7	2.5		2.45	0.95	0.35	1.46	0.27	1.76	0.4	1.18	0.18	1.25	0.21	13	0.05	0.991064	Karelia Craton	[17129] Maier et al., 2013
B-1	9443	50.1599	13.9888	14.2886	9.43245	7.09432	0.29976	3.30735	0.189848	1.16906	0.069944	0.7	100	53.6415	305.389		7014.39	343	144	51	108	3	148		65.5		2.78		2.67	8.13		7.44	2.7	0.95	3.86		4.85		3.15		3.11		28.2	0.206	1.00323	Karelia Craton	[5231] Puchtel et al., 1998
B-1	9437	49.3901	15.8968	13.2973	11.0978	6.82863	0.269946	1.79964	0.19996	1.14977	0.069986	0.7	100	54.479	305.573	48.4	6898.62	358	253	61	120	1.3	78.5		64.4		3.01		2.87	8.57		7.92	2.82	0.986	3.95		4.94		3.24		3.18		29.6	0.206	1.01054	Karelia Craton	[5231] Puchtel et al., 1998
B-1	2492994	48.24	14.0782	14.0048	11.1247	8.42724	1.07309	1.69332	0.196898	0.945111	0.216588	2.97	100	58.3742	945.666		5670.67	375	477	55	161	47	154		42		2.3		2.11	6.09		5.3	1.97	0.71			3.71		2.37		2.27		25		1.0503	Karelia Craton	[5336] Puchtel et al., 1993
B-1	93153	51.5139	15.1041	14.4039	10.1027	6.80184	0.124033	0.7402	0.190051	0.96326	0.0560151	3.65	100	52.3926	244.573	48.6	5779.56	313	334	48	152	1.29	211	14.8	51.8	1.39	1.78	0.111	2.04	6.14		5.28	1.92	0.738	2.72		3.35		2.16		2.09		20.8	0.199	0.840731	Karelia Craton	[6954] Puchtel et al., 1999
B-1	9436	49.7851	15.9952	13.396	10.7968	6.45806	0.329901	1.85944	0.19994	1.10967	0.069979	1.06	100	52.9081	305.542	56.4	6658	351	261	61	129	4.1	70.7		62.7		3.1		2.97	8.68		7.44	2.65	0.923	3.73		4.63		3.03		2.98		28.5	0.209	1.00571	Karelia Craton	[5231] Puchtel et al., 1998
B-1	93151	50.5172	15.1751	13.6776	12.3797	6.00016	0.0519149	0.858592	0.199673	1.02831	0.111817	4.09	100	50.5528	488.213	47.1	6169.88	306	338	54	154	1.04	213	3.12	56.2	1.54	2.07	0.127	2.35	6.99		6.03	2.18	0.82	3.02		3.74		2.4		2.32		23.2	0.224	0.84873	Karelia Craton	[6954] Puchtel et al., 1999
B-1	91145	47.1858	14.4957	14.0958	13.396	8.36749	0.349895	0.949715	0.189943	0.889733	0.079976	2.03	100	58.0436	349.191	40.4	5338.4	298	290	52	145	3.4	87.7		50		2.1		2.52	7.3		6.33	2.24	0.756	3.09		3.82		2.47		2.43		21.6	0.27	0.802945	Karelia Craton	[5231] Puchtel et al., 1998
B-1	59161	50.7736	14.5924	12.1937	11.494	7.79595	0.0619678	1.87902	0.169912	0.938512	0.100948	2.66	100	59.8392	440.757	43.7	5631.07	265	273	50	158	0.8	125	6.87	52.4	1.45	2.1	0.131	2.31	6.65		5.77	2	0.743	2.76		3.39		2.16		2		20.9	0.157	0.87594	Karelia Craton	[6954] Puchtel et al., 1999
B-1	94141	50.974	14.0928	12.0938	10.3947	9.90495	0.349822	1.08944	0.189903	0.846568	0.0639674	2.79	100	65.6204	279.294	42.4	5079.41	249	553	51	151	11.62	113	22.1	44.2	1.25	1.93	0.121	2.25	6.33		5.39	1.8	0.694	2.44		2.99		1.91		1.82		18.4	0.167	0.826498	Karelia Craton	[6954] Puchtel et al., 1999
B-1	13028	49.0602	14.0172	14.787	11.2278	7.5185	0.159968	1.93961	0.229954	0.989802	0.069986		100	54.2323	305.573	46.6	5938.81	304	291	51	148	3	114	15	60	2.1	3.2	0.15	3.4	8.9		6.7	2.71	0.98		0.56					2.68	0.42	26		0.906856	Karelia Craton	[10498] Mil'Kevich et al., 2007
B-1	94143	50.6762	17.1919	11.4946	11.5946	6.54692	0.125941	1.24941	0.179915	0.855598	0.0849601	4.68	100	57.0331	370.952	60.6	5133.59	250	155	46	83	3.14	143	14.7	45	1.31	2.08	0.137	2.52	7.1		5.91	1.93	0.794	2.6		3.14		2		1.92		18.9	0.222	0.795298	Karelia Craton	[6954] Puchtel et al., 1999
B-2	SEF15-023	52.472	13.897	11.6016	8.55837	8.43373	2.07727	1.828	0.155796	0.903614	0.0727046	3.3	100	62.8825	317.443	29	5421.69	236	362.6	46.9	104.1	34.6	372.2	558	79.2	2.2	3.1	0.2	11.2	21	2.69	10.7	2.56	0.84	2.85	0.42	2.57	0.45	1.33	0.2	1.25	0.19	13.4	3.2	0.266693	Karelia Craton	[23194] Mattsson et al., 2019
B-2	HJO-87-90	50.5481	13.7114	11.5524	10.6622	10.4371	0.113682	2.04648	0.173951	0.697953	0.0567899		100	67.7991	247.956	38.2	4187.72			51.5	155	0.79	126	23.2		1.2	1.85	0.02	2.57	6.41	1.04	5.53	1.67	0.54	2.57	0.4	2.71	0.59	1.73	0.24	1.52	0.24	16.6	0.2	0.693595	Karelia Craton	[17129] Maier et al., 2013
B-2	N-333	47.8963	10.2439	13.1402	10.6504	16.8598	0.0609756	0.497967	0.182927	0.416667	0.050813	1.62	100	74.9385	221.86	40.9	2500		1412	72.2	325	0.01	25.5	8.77	11.8	0.381	0.821	0.047	1.17	3.02	0.496	2.58	0.983	0.373	1.22	0.225	1.87	0.387	1.3		1.02		12.8	0.121	0.676121	Karelia Craton	[7341] Shchipansky et al., 1999
B-2	43874	46.5462	10.124	14.6586	14.1574	11.8148	0.488888	0.998145	0.203703	0.957405	0.0509258	1.49	100	65.2582	222.352		5744.43	271	670	45	670				47.7		2.6		3.387	7.893	1.15	6.22	1.759	0.73	2.43	0.48	3.1	0.59	1.61	0.24	1.65	0.27	17.3		0.739648	Karelia Craton	[21962] Vrevskii, 2018
B-2	2C-PTP-03	49.3922	11.7501	12.9876	8.27918	13.9338	0.0738284	2.73477	0.209007	0.607264	0.0322349		100	71.431	140.744	43.8	3643.59			64.9	281	0.27	58.4	5.87		0.87	1.13	0.04	1.53	4.1	0.67	3.95	1.31	0.51	1.92	0.31	2.3	0.5	1.33	0.21	1.55	0.2	14	0.12	0.71163	Karelia Craton	[17129] Maier et al., 2013
B-2	KJP-87-38	50.7779	13.941	10.298	10.7763	10.1352	0.464938	2.55416	0.143786	0.844806	0.0637929		100	69.6386	278.532	42.2	5068.84			44.3	213	20.4	178	75.5		1.24	2.11	0.07	3.09	7.95	1.24	6.55	1.93	0.72	2.78	0.47	3.16	0.63	1.96	0.32	1.86	0.31	18.1	0.25	0.657947	Karelia Craton	[17129] Maier et al., 2013
B-2	47-PTP-03	50.8986	13.5869	12.5443	7.18015	11.6011	0.0940631	3.16679	0.187081	0.689796	0.0512121		100	68.307	223.602	47	4138.78			76.7	205	1.2	112	18.7		0.73	2.27	0.14	6.02	13.4	1.78	8.01	1.77	0.63	2.5	0.42	3.05	0.66	1.7	0.24	1.73	0.25	17.2	1.39	0.363326	Karelia Craton	[17129] Maier et al., 2013
B-2	9026	47.946	14.4243	12.0652	13.0762	9.23442	0.618331	1.56103	0.192595	0.831199	0.0506829	1.37	100	64.0767	221.291		4987.2	227	350	40	112				37.1		1.34		2.67	6.673	0.94	4.237	1.211	0.404	1.397	0.261	1.716	0.356	0.984	0.146	0.973	0.171	16.9		0.483572	Karelia Craton	[21962] Vrevskii, 2018
B-2	36-PTP-03	50.9276	6.08215	12.7316	13.8515	12.3934	0.470741	1.93712	0.372844	1.16644	0.0666537		100	69.4058	291.023	55.7	6998.63			84.9	248	9.48	63.1	247		1.58	3.53	0.24	5.53	14.5	2.14	11.6	3.28	1.15	3.97	0.57	3.07	0.63	1.63	0.22	1.26	0.18	17.8	1.23	0.615059	Karelia Craton	[17129] Maier et al., 2013
B-2	22-PTP-03	52.5231	14.3618	10.1907	10.7816	7.3245	0.147721	3.58018	0.178496	0.847345	0.064628		100	62.6173	282.178	40.6	5084.07			41.9	162	0.62	129	28.4		1.28	2.15	0.14	3.52	9.11	1.26	6.88	2.61	0.66	3.7	0.57	3.88	0.79	2.37	0.35	2.11	0.32	20	0.42	0.588522	Karelia Craton	[17129] Maier et al., 2013
B-2	A2316	51.3634	14.3575	14.5629	10.3434	6.94619	0.252772	1.05153	0.374103	0.707763	0.0404436	0.99	100	52.6424	176.585		4246.58	206	1570			3.8	71.3	18.1	32	0.8	1.6	0.5	2.5	6.7	0.9	4.3	1.31	0.65	2.45	0.33	2.42	0.57	1.8	0.23	1.43	0.25	14.3	0.18	0.616662	Karelia Craton	[20103] Lehtonen et al., 2016
B-2	2493663	49.2988	12.3494	12.5168	10.2747	12.2506	0.602651	1.66964	0.187711	0.632289	0.217349	2.75	100	69.5208	948.991		3793.74		414	71	356	25	82		52		3.3		5.32	12		6.51	1.76	0.578	2.19		2.49		1.58		1.55		16		0.597681	Karelia Craton	[5336] Puchtel et al., 1993
B-2	35/12A	45.9046	12.2012	12.3412	14.6215	11.6312	0.890089	1.25013	0.220022	0.740074	0.20002		100	68.7149	873.327	31.2	4440.44	188	1163	50	375	34	550	149	48	1.6	4	0.12	11.3	27.8		17.5	3.99	1.2		0.53					1.39	0.2	19	0.75	0.341074	Karelia Craton	[10498] Mil'Kevich et al., 2007
B-2	2494608	49.4619	13.7894	12.2905	10.5918	10.8916	0.469638	1.54881	0.179862	0.576556	0.199846	1.22	100	67.3761	872.568	45.1	3459.34		740		143				37.6	1.09	1.71	0.112	4.15	9.48		5.53	1.54	0.52	2.02		2.45		1.63		1.65		15.6	0.577	0.397023	Karelia Craton	[10680] Puchtel et al., 2007
B-2	94142	51.0342	13.9093	12.3082	10.7072	9.60644	0.339227	1.06071	0.190127	0.76151	0.0830556	2.63	100	64.5255	362.637	50.4	4569.06		538	50	156	6.77	106	26.9	41.9	1.18	1.7	0.114	2.25	6.3		5.06	1.69	0.613	2.23		2.72		1.73		1.66		16.9	0.193	0.728004	Karelia Craton	[6954] Puchtel et al., 1999
B-2	2493877	48.2701	14.3911	13.0919	10.2936	9.9938	1.21924	1.63898	0.179888	0.721553	0.199876	1.76	100	64.0159	872.698	45.8	4329.32		495		265				47.1	1.25	2.04	0.126	4.44	10.4		6.52	1.89	0.617	2.4		2.82		1.77		1.73		17.6	0.705	0.442705	Karelia Craton	[10680] Puchtel et al., 2007
B-2	94144	53.01	16.65	10.14	7.87	6.91	1.01	3.38	0.17	0.76	0.1		100	61.3622	436.62		4560					22.8	136	254			2.99		9.25	22.8		12.8	2.88	0.854	2.78		2.74		1.51		1.43		13.1	0.869	0.311456	Karelia Craton	[7252] Samsonov et al., 2005
B-2	2492933	48.1904	14.0972	13.9972	11.0978	8.43831	1.07978	1.69966	0.189962	0.9998	0.209958	1.6	100	58.4192	916.718	51.1	5998.8		471		159				51.8	1.37	1.55	0.104	2.07	6.01		5.23	1.94	0.701	2.93		3.66		2.34		2.24		22.7		0.721487	Karelia Craton	[10680] Puchtel et al., 2007
B-2	93154	50.5262	14.379	13.9796	10.285	8.12813	0.2057	1.27813	0.179738	0.987558	0.0509256	2.89	100	57.5375	222.351	48.9	5925.35	314	335	46	144	3.36	169	36.2	52.2	1.45	1.52	0.106	2.09	6.16		5.37	2.01	0.743	2.74		3.43		2.21		2.09		21	0.181	0.700752	Karelia Craton	[6954] Puchtel et al., 1999
B-2	93150	50.3884	14.9966	13.197	12.1972	6.79844	0.0719834	1.10974	0.199954	0.971776	0.0689841	2.53	100	54.557	301.198	52.1	5830.66	295	320	47	152	0.79	257	9.82	54.3	1.49	1.77	0.125	2.33	6.59		5.86	2.08	0.775	2.95		3.68		2.36		2.18		22.2	0.199	0.731955	Karelia Craton	[6954] Puchtel et al., 1999
B-2	21551	48.3052	15.9284	13.0787	9.93901	5.61944	1.52985	3.88961	0.239976	1.12989	0.339966		100	50.0333	1484.36	26.3	6779.32	295	89	37.5	31	54	711	532	84	2.7	4.3	0.23	15.1	33.8		20.2	4.88	1.4		0.77					2.56	0.36	26		0.274384	Karelia Craton	[10498] Mil'Kevich et al., 2007
HMA	HJO-87-79.2	55.9504	12.9272	9.19647	5.43951	9.76607	0.299951	5.38295	0.156035	0.737454	0.144017		100	71.2217	628.805	34.7	4424.73			50.2	384	9.01	410	123		2.04	2.96	0.13	8.68	18.4	2.64	12.2	2.89	0.94	3.35	0.52	3.02	0.64	1.89	0.27	1.78	0.26	18	1.63	0.328579	Karelia Craton	[17129] Maier et al., 2013
B-2	477348	47.2176	17.6255	13.4345	9.8877	8.13326	0.273813	2.46432	0.212966	0.709886	0.0405649	1.57	100	58.5215	177.114	29	4259.32	178	96	55	178	6	106	51	41	1.2	1.1	0.07	1.9	4.9	0.8	4.08	1.6	0.62	2.4	0.48	3.3	0.83	2.4	0.38	2.5	0.4	22.9	0.2	0.557836	North Atlantic Craton	[10271] Garde, 2007
B-2	477345	49.4985	15.3514	12.5445	10.4747	7.81288	0.955021	2.42819	0.203196	0.680706	0.050799	1.66	100	59.2081	221.798	40	4084.24	200	219	51	152	21	185	171	42	1.2	1.8	0.1	3.4	8.4	1.3	5.79	1.8	0.66	2.3	0.46	3.2	0.79	2.2	0.34	2.2	0.36	21.1	0.2	0.510106	North Atlantic Craton	[10271] Garde, 2007
B-2	477378	49.3542	15.6638	12.077	10.8873	8.69758	0.305536	2.21004	0.193506	0.590702	0.020369	1.61	100	62.6639	88.9353	42	3544.21	207	261	54	188	10	87	45	32	1	0.8	0.07	1.3	3.3	0.5	2.97	1.3	0.51	2	0.41	2.9	0.72	2.1	0.34	2.2	0.34	19.8	0.2	0.592944	North Atlantic Craton	[10271] Garde, 2007
B-2	477305	49.0551	16.1464	11.9068	11.7942	8.42156	0.191858	1.71663	0.18176	0.555379	0.0302934	1.3	100	62.2404	132.267	41	3332.27	212	341	52	180	3	63	28	33	1	0.8	0.06	2.2	4.8	0.6	3.21	1.2	0.5	1.9	0.37	2.5	0.64	1.8	0.3	2	0.32	17.4	0.3	0.350376	North Atlantic Craton	[10271] Garde, 2007
HMA	477324	55.3762	17.4211	8.56483	7.7979	5.06001	1.32838	3.2956	0.152105	0.892347	0.111543	1.06	100	57.9272	487.02	32	5354.08	148	204	31	74	56	136	430	119	3.2	5.7	0.38	11	23.4	2.9	11.94	3.1	0.92	3	0.53	3.2	0.68	1.9	0.27	1.7	0.27	18.3	0.5	0.499286	North Atlantic Craton	[10271] Garde, 2007
B-2	220417	49.3053	12.2048	10.9052	7.81899	15.886	0.853341	1.96467	0.178606	0.684658	0.198451		100	77.2465	866.478	20	4107.95	170	1624		767	19	251	306	76		3		14	32		15											12		0.206472	North Atlantic Craton	[10442] Hall et al., 1985
AUK	485486	48.31	8.7	13.91	8.62	18.77	0.08	0.96	0.25	0.37	0.03	2.46	100	75.8731	130.986	27.7	2220	204	1640	81	705	1	61	31	27.7		1.2	0.09	3.31	7.52	0.93	4.02	1.19	0.28	1.52	0.25	1.7	0.36	1.06	0.16	1.08	0.16	9.4	0.72	0.349318	North Atlantic Craton	[11346] Polat et al., 2008
B-2	485418	48.41	10.87	12.51	11.26	14.9	0.15	1.23	0.22	0.43	0.02	1.5	100	73.5151	87.3239	35.5	2580		5713	93	605	12.3	43	45	22.3		0.94	0.07	2.25	4.95	0.76	3.66	1.11	0.44	1.64	0.29	1.96	0.42	1.3	0.19	1.24	0.18	11	0.4	0.402543	North Atlantic Craton	[11346] Polat et al., 2008
B-2	485422	47.72	10.58	12.31	9.64	17.27	0.9	0.89	0.2	0.45	0.04	2.93	100	76.5781	174.648	35	2700		5282	83	647	148.5	16	137	27.5		1.09	0.07	2.39	5.6	0.77	3.69	1.11	0.38	1.59	0.28	1.89	0.41	1.27	0.18	1.19	0.18	10.9	0.55	0.439436	North Atlantic Craton	[11346] Polat et al., 2008
B-2	485470	51.74	14.32	10.33	11.94	8.59	0.16	2.16	0.17	0.54	0.05	0.6	100	65.9626	218.31	36.2	3240	291	300	57	141	2.7	96	49	28.2		1.42	0.1	2.84	6.99	1	4.83	1.43	0.56	1.9	0.37	2.44	0.51	1.61	0.23	1.49	0.21	14.1	0.48	0.481767	North Atlantic Craton	[11346] Polat et al., 2008
B-2	485469	50.9449	14.4886	10.8489	11.2689	8.89911	0.139986	2.62974	0.169983	0.559944	0.049995	0.69	100	65.6553	218.288	37.3	3359.66	294	300	55	128	2	120	58	30.2		1.51	0.09	2.85	7.08	1.01	4.94	1.56	0.57	1.99	0.36	2.56	0.55	1.59	0.23	1.47	0.22	14.4	0.48	0.510504	North Atlantic Craton	[11346] Polat et al., 2008
B-2	485420	52.06	12.01	11.17	12.66	10.12	0.01	1.23	0.19	0.51	0.04	0.82	100	67.8604	174.648	37.3	3060	199	2999	62	331	0.4	90	30	33.3		1.26	0.09	3.31	7.83	1.06	4.96	1.39	0.46	1.85	0.33	2.28	0.48	1.46	0.21	1.4	0.21	12.3	0.708	0.366783	North Atlantic Craton	[11346] Polat et al., 2008
B-2	485468	50.095	14.1214	11.6012	10.7811	9.75098	0.140014	2.67027	0.190019	0.60006	0.050005	0.85	100	66.2028	218.332	37.3	3600.36	234	230	57	125	2	123	37	36.3		1.54	0.11	2.98	7.6	1.09	5.26	1.67	0.58	2.17	0.39	2.65	0.57	1.73	0.23	1.5	0.22	14.7	0.79	0.497934	North Atlantic Craton	[11346] Polat et al., 2008
AUK	499742	49.35	8.38	11.51	9.43	19.07	0.28	1.39	0.2	0.36	0.03	2.04	100	79.429	130.986	27	2160	147	1862	77	819	20.9	112	61.2	24.3		0.99	0.09	3.24	7.78	1.01	4.39	1.15	0.3	1.43	0.27	1.78	0.38	1.24	0.18	1.28	0.21	10.7	0.75	0.294413	North Atlantic Craton	[11427] Ordonez-Calderon et al., 2008
AUK	499743	49.1949	8.30083	11.5912	9.78098	18.9119	0.190019	1.44014	0.20002	0.360036	0.030003	1.91	100	79.1771	130.999	28	2160.22	149	1896	77	820	6	112.6	19.4	27.7		0.94	0.09	3.3	8.26		3.98	1.08	0.31	1.37	0.24	1.66	0.36	1.1	0.16	1.1	0.17	9.7	0.87	0.274461	North Atlantic Craton	[11427] Ordonez-Calderon et al., 2008
B-1	485415	52.3048	18.2682	10.059	9.59904	4.36956	0.169983	3.88961	0.19998	1.08989	0.049995	0.45	100	50.307	218.288	50	6539.35	321	233	67	180	2.6	74.4	42.7	56.1		2.31	0.16	2.81	7.65	1.19	5.81	1.95	0.82	2.65	0.46	3.11	0.67	2.01	0.3	1.86	0.28	16	0.42	0.792087	North Atlantic Craton	[11427] Ordonez-Calderon et al., 2008
B-1	485404	50.04	13.87	15.62	9.41	6.62	0.26	2.15	0.23	1.61	0.19	0.62	100	49.6907	829.577	42	9660	327	133	43	74	8.4	93.4	112.5	90.8		3.68	0.23	3.93	11.79	1.92	9.94	3.27	1.18	4.55	0.76	5.14	1.09	3.22	0.47	3.1	0.46	28	0.81	0.902241	North Atlantic Craton	[11427] Ordonez-Calderon et al., 2008
B-2	485410	52.8947	13.7286	10.6089	11.3989	6.22938	0.49995	3.32967	0.229977	0.909909	0.169983	0.65	100	57.7779	742.179	47	5459.45	304	405	43	123	3.7	154.4	190.8			2.66	0.17	11.79	24.67	3.34	14.85	3.73	1.16	4.13	0.64	4.08	0.82	2.42	0.34	2.26	0.32	21.1	1.98	0.217388	North Atlantic Craton	[11427] Ordonez-Calderon et al., 2008
B-2	485407	48.09	13.45	14.53	14.5	6.77	0.13	1.77	0.13	0.61	0.02	0.8	100	52.058	87.3239	24	3660	312	151	49	101	2.9	127.7	19.7			1.08	0.1	2.25	6.87	1.3	8.03	3.39	0.76	4.85	0.86	5.82	1.26	3.66	0.5	3.14	0.45	31.2	0.44	0.462496	North Atlantic Craton	[11427] Ordonez-Calderon et al., 2008
B-2	496123	52.1852	14.2314	13.5814	11.2111	6.46065	0.260026	0.80008	0.210021	0.980098	0.080008	0.48	100	52.5756	349.331	48	5880.59	327	138	48	139	1.3	104.5	33.5	52.3		1.15	0.09	2.46	6.53	1.05	5.61	2.14	0.72	3.54	0.66	4.59	1.01	3.15	0.46	3.06	0.46	26.4	0.31	0.450433	North Atlantic Craton	[11427] Ordonez-Calderon et al., 2008
B-2	496114	49.3751	11.0589	18.9981	9.22908	5.66943	0.569943	2.79972	0.29997	1.73983	0.259974	0.5	100	41.0193	1135.1	47	10439	299	190	34	105	24	21.6	53.4	59.1		2.21	0.14	4.57	11.83	1.82	9.14	3.03	1.1	4.25	0.75	5.06	1.09	3.32	0.48	3.28	0.51	28.5	0.61	0.465954	North Atlantic Craton	[11427] Ordonez-Calderon et al., 2008
B-2	496118	48.3252	15.2485	12.8387	13.1287	8.46915	0.049995	1.07989	0.209979	0.609939	0.039996	0.95	100	60.5885	174.63	50	3659.63	278	395	58	239	3.4	53.8	8.9			0.5	0.03	1.04	3	0.51	3.04	1.34	0.5	2.25	0.45	3.23	0.74	2.34	0.34	2.32	0.34	19.3	0.12	0.463238	North Atlantic Craton	[11427] Ordonez-Calderon et al., 2008
B-2	485414	50.6551	15.2315	11.5812	12.4612	7.62076	0.080008	1.39014	0.180018	0.750075	0.050005	0.85	100	60.5296	218.332	43	4500.45	243	122	49	117	1.1	126.1	17.5	42.4		1.61	0.11	2.57	6.98	1.11	5.54	1.9	0.7	2.45	0.43	2.93	0.6	1.85	0.26	1.7	0.25	15.3	0.37	0.603615	North Atlantic Craton	[11427] Ordonez-Calderon et al., 2008
B-2	485416	52.45	15.85	9.41	14.71	4.59	0.18	1.71	0.22	0.81	0.07	0.69	100	53.2004	305.634	42	4860	272	981	53	187	2.4	115.1	24.3	42.4		1.76	0.12	2.82	7.64	1.18	6.17	2.08	0.74	2.76	0.47	3.2	0.7	2.16	0.33	2.08	0.31	18	0.4	0.601355	North Atlantic Craton	[11427] Ordonez-Calderon et al., 2008
B-2	485409	50.62	13.98	14.85	9.53	5.67	0.33	2.95	0.22	1.59	0.26	0.36	100	47.0851	1135.21	43	9540	256	104	39	70	6.4	119.6	47.4	76.4		2.48	0.17	5.86	15.56	2.3	11.47	3.57	1.35	5.06	0.88	5.85	1.3	3.85	0.54	3.56	0.54	32.7	0.68	0.407776	North Atlantic Craton	[11427] Ordonez-Calderon et al., 2008
B-2	485405	51.25	14.6	12.03	10.12	8.14	0.08	2.36	0.19	1.04	0.19	0.79	100	61.1939	829.577	35	6240	195	245	42	92	1	129.7	17.4	94.8		2.45	0.15	4.09	12.03	1.9	9.82	3.14	1.24	4.18	0.71	4.7	1.01	2.99	0.43	2.83	0.43	25.5	0.6	0.577178	North Atlantic Craton	[11427] Ordonez-Calderon et al., 2008
B-2	496120	50.84	15.47	9.75	13.9	7.57	0.17	1.25	0.2	0.79	0.06	0.69	100	64.4055	261.972	41	4740	245	269	53	274	0.5	118	25	42.6		1.49	0.11	2.75	7.61	1.12	5.81	1.88	0.66	2.57	0.45	3.03	0.64	1.94	0.28	1.86	0.27	16.5	0.36	0.52206	North Atlantic Craton	[11427] Ordonez-Calderon et al., 2008
B-2	496117	48.5749	15.4215	13.5914	10.401	8.84088	0.150015	2.13021	0.190019	0.650065	0.050005	0.99	100	60.2534	218.332	46	3900.39	262	252	56	227	1.4	88.5	17.6	32.6		0.61	0.06	1.33	3.87	0.59	3.36	1.41	0.53	2.31	0.46	3.24	0.75	2.32	0.35	2.36	0.36	19.5	0.18	0.441922	North Atlantic Craton	[11427] Ordonez-Calderon et al., 2008
B-2	496122	48.7	16.56	10.71	10.96	9.93	0.32	2.07	0.21	0.5	0.04	1.23	100	68.3622	174.648	42	3000	216	301	54	279	62.6	123.6	51	21.2		1.01	0.07	1.38	3.92	0.58	3.09	1.12	0.4	1.56	0.29	1.91	0.42	1.24	0.18	1.17	0.18	10.5		0.705195	North Atlantic Craton	[11427] Ordonez-Calderon et al., 2008
B-2	496119	48.2248	15.8716	12.7313	11.9112	8.27083	0.210021	1.74017	0.20002	0.780078	0.060006	0.67	100	60.2228	261.998	44	4680.47	278	275	53	236	1.5	84.4	14.2	40.5		1.37	0.1	2.06	6.05	0.9	4.71	1.69	0.57	2.28	0.41	2.83	0.61	1.82	0.26	1.72	0.26	15.6	0.47	0.640797	North Atlantic Craton	[11427] Ordonez-Calderon et al., 2008
HMA	485425	56.8657	15.2215	7.08071	12.4512	6.46065	0.110011	1.08011	0.170017	0.520052	0.040004	0.52	100	68.0145	174.665	44	3120.31	217	2030	51	218	1.6	46.9	31.4	31.5		1.36	0.08	2.63	6.43	0.89	4.54	1.36	0.5	2.12	0.37	2.66	0.58	1.73	0.26	1.68	0.27	14.5	0.66	0.498254	North Atlantic Craton	[11427] Ordonez-Calderon et al., 2008
HMA	496121	55.2945	13.8986	9.45905	11.1889	7.72923	0.129987	1.35986	0.179982	0.69993	0.059994	0.68	100	65.5684	261.946	36	4199.58	221	235	48	232	1.1	116.7	23.1	37.1		1.29	0.1	2.28	6.21	0.95	5.01	1.64	0.58	2.23	0.4	2.72	0.59	1.73	0.25	1.61	0.24	14.8	0.32	0.545158	North Atlantic Craton	[11427] Ordonez-Calderon et al., 2008
AUK	485475	48.84	6.28	9.9	12.03	22.29	0.01	0.2	0.17	0.27	0.01	3.97	100	83.9927	43.662	26	1620	107	1654	83	735	0.7	33	6.1	15.6		0.69	0.06	1.82	4.26	0.63	2.89	0.87	0.21	1.22	0.22	1.52	0.33	0.99	0.14	1.03	0.15	8.4	0.356	0.365296	North Atlantic Craton	[11627] Polat et al., 2007
AUK	485478	48.1648	7.19072	10.321	10.391	23.1923	0.010001	0.260026	0.180018	0.260026	0.030003	4.66	100	83.9663	130.999	23	1560.16	107	1692	84	897	0.6	38	2.6			0.7	0.05	1.92	4.14	0.56	2.55	0.73	0.23	1.06	0.17	1.24	0.26	0.83	0.12	0.86	0.12	7.4	0.238	0.351289	North Atlantic Craton	[11627] Polat et al., 2007
AUK	485474	48.73	7.05	10.42	9.56	23.51	0.01	0.25	0.17	0.28	0.02	4.64	100	84.0209	87.3239	24	1680	112	1670	84	852	0.7	31	10.9	14.6		0.73	0.05	1.59	3.75	0.54	2.43	0.7	0.22	0.98	0.17	1.26	0.27	0.82	0.12	0.81	0.12	7.1	0.259	0.442377	North Atlantic Craton	[11627] Polat et al., 2007
AUK	485481	50.39	8.69	11.08	8.46	18.61	1.33	0.86	0.2	0.35	0.03	2.05	100	79.6513	130.986	28	2100	142	1298	81	608	275.8	69	216.1	25.5		1.11	0.08	3.56	7.8	1	4.34	1.1	0.41	1.54	0.25	1.84	0.38	1.19	0.18	1.24	0.18	10.9	0.683	0.300428	North Atlantic Craton	[11627] Polat et al., 2007
AUK	485473	50.34	6.36	9.21	10.23	23.09	0.02	0.3	0.17	0.27	0.01	4.15	100	85.3859	43.662	24	1620	104	1575	84	845	0.8	33	1.9	12.5		0.77	0.05	1.69	4.1	0.52	2.35	0.73	0.23	0.98	0.18	1.2	0.26	0.85	0.13	0.84	0.13	7	0.339	0.439007	North Atlantic Craton	[11627] Polat et al., 2007
B-2	485451	51.33	14.02	10.2	14.16	7.86	0.11	1.5	0.22	0.56	0.04	3.76	100	64.2328	174.648	47	3360	243	634	52	253	2.2	137.9	39	32.8	1.13	1.29	0.1	3.21	7.4	1.03	4.74	1.34	0.5	2.06	0.35	2.48	0.54	1.64	0.25	1.56	0.25	13.7	0.76	0.387215	North Atlantic Craton	[11627] Polat et al., 2007
B-2	485417	47.9352	11.2589	11.6688	12.3288	14.8085	0.139986	1.19988	0.179982	0.449955	0.029997	1.44	100	74.7319	130.973	36	2699.73		5569	73	466	14.2	101	26.4	28.4		0.92	0.07	1.95	4.92	0.73	3.59	1.13	0.37	1.52	0.27	1.9	0.4	1.23	0.18	1.19	0.18	10.4	0.372	0.454591	North Atlantic Craton	[11627] Polat et al., 2007
B-2	485459	51.9752	13.2813	11.1911	12.0812	8.59086	0.150015	1.94019	0.220022	0.530053	0.040004	0.95	100	64.1449	174.665	42	3180.32	231	592	61	314	2.5	80.1	39.9	32.6	1.05	1.15	0.08	2.56	6.14	0.86	4.16	1.37	0.46	1.95	0.35	2.45	0.53	1.56	0.23	1.5	0.23	13.5	0.63	0.432838	North Atlantic Craton	[11627] Polat et al., 2007
B-2	485462	50.3301	12.2324	12.3425	11.8324	10.3221	0.25005	1.86037	0.240048	0.55011	0.040008	1	100	66.0903	174.683	45	3300.66	229	604	62	207	3.3	61.4	56.9	33.1	1.14	1.17	0.08	2.23	5.75	0.86	3.99	1.33	0.47	1.99	0.35	2.44	0.52	1.53	0.23	1.5	0.23	13.4	0.59	0.505531	North Atlantic Craton	[11627] Polat et al., 2007
B-2	485453	51.4003	14.5729	10.8322	11.4123	8.24165	0.180036	2.56051	0.20004	0.580116	0.020004	0.8	100	63.94	87.3414	46	3480.7	251	688	63	319	1.8	74	48.7	34.1	1.18	1.22	0.09	2.64	6.72	0.98	4.6	1.43	0.52	2.18	0.38	2.6	0.57	1.68	0.25	1.62	0.25	14.4	0.69	0.44527	North Atlantic Craton	[11627] Polat et al., 2007
B-2	485457	49.4751	14.5485	11.5688	12.8887	8.64914	0.149985	1.88981	0.229977	0.559944	0.039996	0.82	100	63.5347	174.63	46	3359.66	251	670	69	315	3	83.7	44.1	35	1.15	1.19	0.09	2.75	6.98	0.99	5	1.63	0.52	2.32	0.42	2.87	0.64	1.89	0.28	1.83	0.27	15.9	0.64	0.416948	North Atlantic Craton	[11627] Polat et al., 2007
B-2	485466	49.89	13.36	11.82	12.35	9.8	0.16	1.86	0.21	0.5	0.05	0.87	100	65.8962	218.31	41	3000		603	51	248	2.3	118.1	45.2	30.7	1.04	1.12	0.08	2.45	6.18	0.86	4.12	1.29	0.44	1.87	0.35	2.34	0.5	1.49	0.22	1.47	0.23	13.4	0.66	0.440473	North Atlantic Craton	[11627] Polat et al., 2007
B-2	485458	48.5151	14.1586	12.0888	13.1787	9.44906	0.159984	1.61984	0.219978	0.569943	0.039996	0.89	100	64.5592	174.63	46	3419.66		642	60	255	2.7	93.8	44.1	34.1	1.16	1.29	0.11	2.6	6.7	0.95	4.49	1.52	0.42	2.1	0.39	2.6	0.58	1.7	0.24	1.53	0.23	14.5	0.7	0.478061	North Atlantic Craton	[11627] Polat et al., 2007
B-2	485482	49.75	9.02	10.65	11.5	17.1	0.03	1.38	0.18	0.37	0.02	1.8	100	78.9115	87.3239	26	2220		1414	81	659	2.3	76	9.6	29.5		1.29	0.09	3.34	7.96	1.04	4.57	1.17	0.41	1.54	0.27	1.75	0.39	1.15	0.18	1.21	0.19	10.7	0.825	0.372144	North Atlantic Craton	[11627] Polat et al., 2007
B-2	485465	48.2248	13.1513	12.8213	13.0613	10.401	0.150015	1.33013	0.260026	0.570057	0.030003	1.01	100	65.4048	130.999	45	3420.34	218	640	68	228	4.6	93.6	53.5	34.3	1.1	0.95	0.08	1.72	4.88	0.75	3.64	1.2	0.45	1.91	0.35	2.43	0.57	1.67	0.24	1.64	0.25	14	0.89	0.532185	North Atlantic Craton	[11627] Polat et al., 2007
B-2	485461	47.4653	14.7385	12.8487	12.8987	9.39906	0.209979	1.60984	0.239976	0.559944	0.029997	0.93	100	63.0287	130.973	45	3359.66	225	623	63	265	7.8	69.1	68.9	32.5	1.13	1.03	0.08	2.07	5.57	0.81	4.08	1.34	0.49	2.01	0.37	2.49	0.55	1.57	0.24	1.65	0.24	14	0.62	0.47944	North Atlantic Craton	[11627] Polat et al., 2007
B-2	485464	51.12	14.72	10.65	11.71	8.21	0.18	2.63	0.19	0.54	0.05	0.76	100	64.2418	218.31	44	3240	217	631	49	264	1.5	99.2	73.3	32.3	1.13	1.22	0.09	2.03	5.63	0.84	4.12	1.45	0.52	1.99	0.35	2.55	0.55	1.72	0.24	1.57	0.24	14.2	0.8	0.57907	North Atlantic Craton	[11627] Polat et al., 2007
B-2	485460	47.44	14.85	12.7	12.98	9.38	0.19	1.63	0.24	0.56	0.03	1	100	63.2524	130.986	44	3360	227	631	63	271	2.5	61.3	45.2	32.8	1.07	1.21	0.07	2.48	6.47		4.05	1.28	0.48	1.94	0.34	2.32	0.5	1.5	0.21	1.5	0.22	13.1	0.62	0.470112	North Atlantic Craton	[11627] Polat et al., 2007
HMA	485449	58.2758	15.2515	6.25063	12.0112	5.34053	0.110011	1.9902	0.170017	0.570057	0.030003	0.74	100	66.5684	130.999	46	3420.34	226	649	38	175	2.7	76.2	49.7	30.7	1.09	1.21	0.09	3.09	7.42	1.07	4.79	1.49	0.52	2.09	0.38	2.53	0.54	1.68	0.24	1.64	0.25	14	0.7	0.377306	North Atlantic Craton	[11627] Polat et al., 2007
HMA	485455	58.4258	14.3614	6.22062	13.6014	5.79058	0.110011	0.810081	0.170017	0.480048	0.030003	0.49	100	68.4482	130.999	39	2880.29	208	584	39	212	2.9	89.2	39.8	29	0.95	1.07	0.08	3.08	6.92	0.93	4.35	1.38	0.48	1.84	0.33	2.29	0.49	1.46	0.21	1.45	0.21	12.4	0.65	0.334734	North Atlantic Craton	[11627] Polat et al., 2007
HMA	485450	58.2058	13.7214	8.78088	11.5212	5.58056	0.10001	1.37014	0.160016	0.520052	0.040004	0.68	100	59.6955	174.665	42	3120.31	206	603	45	182	2.3	65.3	30.8	29.3	0.93	1.17	0.08	2.39	6.17	0.86	4.16	1.27	0.46	1.92	0.33	2.3	0.49	1.5	0.22	1.51	0.21	12.7	0.67	0.471688	North Atlantic Craton	[11627] Polat et al., 2007
HMA	485454	56.61	14.89	8.19	11.68	5.88	0.18	1.82	0.16	0.54	0.05	0.56	100	62.5914	218.31	43	3240	225	620	58	257	2.2	86.5	53.3	32.6	1.02	1.32	0.08	4.34	10.45		5.36	1.43	0.56	1.97	0.37	2.47	0.51	1.57	0.22	1.51	0.22	13	0.7	0.293057	North Atlantic Craton	[11627] Polat et al., 2007
B-1	465619A2	49.705	11.2389	15.2385	11.0489	9.69903	0.389961	1.42986	0.259974	0.959904	0.029997	1.62	100	59.7314	130.973	42.7	5759.42	273	569	65	163	7.1	35	25	59	2.03	2.13	0.14	2.12	5.73	0.92	5.66	2.15	0.93	3.03	0.67	4.35	0.85	2.49	0.37	2.38	0.35	24.4	0.51	0.968079	North Atlantic Craton	[12870] Appel et al., 2009
B-1	465601	49.2	9.7	16.9	11	10.5	0.5	1.1		1	0.1		100	59.1494	436.62	49	6000	262	334	61	105	23	25	53	47	1.47	1.8	0.13	1.44	4.24	0.74	4.16	1.77	0.68	2.63	0.52	3.55	0.77	2.15	0.31	1.99	0.28	19.5	0.63	1.20442	North Atlantic Craton	[12870] Appel et al., 2009
B-1	465620A	46.6	11.4	16.9	10.9	11	1.2	1.1		0.9			100	60.2685		45	5400	234	490	59	162	39	33	66	19	0.64	1.85	0.13	1.84	5.63	0.92	5	1.95	0.61	2.48	0.51	3.39	0.71	1.96	0.29	1.76	0.29	18.2	0.6	0.968771	North Atlantic Craton	[12870] Appel et al., 2009
B-2	465617B2	50.6451	10.5911	14.3314	11.7312	9.63096	0.410041	1.46015	0.270027	0.880088	0.050005	2.67	100	61.0309	218.332	40	5280.53	254	595	69	175	12.3	53	36	56	1.85	1.85	0.12	3.07	7.74	1.15	6.36	2.1	0.81	3.01	0.6	3.87	0.76	2.19	0.33	2.06	0.32	21.8	0.47	0.580631	North Atlantic Craton	[12870] Appel et al., 2009
B-2	465617C2	49.9	10.67	14.85	11.84	9.86	0.29	1.4	0.27	0.88	0.04	2.17	100	60.7441	174.648	39.9	5280	259	582	60	163	3.1	32	6	65	1.84	1.84	0.12	2.56	7.03	1.08	6.14	2.18	0.95	2.88	0.61	3.93	0.76	2.21	0.33	2.08	0.31	21.5	0.47	0.69254	North Atlantic Craton	[12870] Appel et al., 2009
B-2	465617A2	50.57	10.24	15.24	11.04	10.04	0.52	1.12	0.26	0.91	0.06	1.99	100	60.5572	261.972	41.8	5460	268	602	69	173	12.2	16	38	56	1.94	1.94	0.13	2.81	7.79	1.2	6.73	2.27	0.86	3.2	0.64	4.19	0.82	2.33	0.35	2.28	0.34	22.9	0.49	0.665216	North Atlantic Craton	[12870] Appel et al., 2009
HMA	465617B1	54.1946	11.8988	10.049	13.2887	6.53935	0.19998	2.65973	0.239976	0.859914	0.069993	5.39	100	60.2633	305.603	37	5159.48	226	559	48	158	3.2	194	22	61	1.79	2	0.13	5.23	11.91	1.64	8.31	2.56	0.99	3.31	0.63	3.96	0.77	2.14	0.32	2.02	0.3	22	0.46	0.368464	North Atlantic Craton	[12870] Appel et al., 2009
HMA	465617A1	55.8244	11.3589	9.89901	12.2988	6.62934	0.19998	2.59974	0.229977	0.859914	0.09999	4.78	100	60.9486	436.576	33	5159.48	219	545	48	147	4.2	172	28	53	1.89	1.99	0.13	6.27	14.15	1.96	9.68	2.9	1.04	3.74	0.7	4.35	0.84	2.37	0.34	2.21	0.33	23.7	0.5	0.305811	North Atlantic Craton	[12870] Appel et al., 2009
HMA	465619B2	57.43	10.55	11.7	9.2	7.72	0.61	1.74	0.2	0.79	0.06	1.75	100	60.5947	261.972	33	4740	207	499	55	142	28.5	94	63	35	1.73	1.73	0.12	3.31	8.87	1.29	6.62	2.12	0.78	2.81	0.54	3.46	0.67	1.92	0.28	1.76	0.27	19	0.45	0.5036	North Atlantic Craton	[12870] Appel et al., 2009
HMA	JG03/60	60.2348	11.5365	9.18836	9.29045	5.00255	0.153139	3.57325	0.153139	0.816743	0.0510465		100	55.9244	222.879	32	4900.46		231		73.7	0.96	222	34.8	62.5	1.68	2.27	0.16	6.39	15.2	2.18	10.6	2.94	1.2	3.66	0.61	3.57	0.7	1.98		1.72	0.25	18.5	0.74	0.342288	North Atlantic Craton	[13196] Jenner et al., 2009
HMA	JG03/41	54.7515	14.7758	11.5373	7.0843	5.06022	0.253011	5.24238	0.192288	1.00192	0.101204		100	50.5477	441.878	28	6011.54		80		69.8	3.79	229	52.9	90.4	2.39	3.73	0.25	7.79	19.7	2.82	13	3.53	1.13	4.11	0.7	4.19	0.85	2.45		2.29	0.34	21.7	1.28	0.461359	North Atlantic Craton	[13196] Jenner et al., 2009
HMA	JG03/43	54.0183	14.7508	12.5127	6.61241	5.28993	1.16989	4.34385	0.17294	1.02747	0.101729		100	49.6286	444.171	28	6164.8		63		60	40.05	178	219	94.5	2.48	3.83	0.26	8.72	21.3	3.01	13.8	3.69	1.13	4.3	0.75	4.43	0.92	2.65		2.46	0.36	23.7	1.33	0.423204	North Atlantic Craton	[13196] Jenner et al., 2009
B-2	242717A	48.6035	15.8652	10.3843	10.2268	13.4922	0.052499	0.818984	0.199496	0.167997	0.188996	3.75	100	75.1738	825.195		1007.98	163	728	56	330	1.37	60	7.5		0.32	0.16	0.0175	0.51	1.09		0.82	0.36	0.12	0.61	0.14	1.1	0.26	0.83	0.18	1.11	0.18	9.1	0.053	0.302285	North Atlantic Craton	[13798] Furnes et al., 2009
B-2	242743	49.1376	17.1855	10.1914	6.60496	15.5974	0.0210349	0.694152	0.147244	0.220867	0.199832	4.85	100	78.1023	872.505		1325.2	185	701	63.4	342	1.08	52.2	5	12.5	0.35	0.23	0.0179	0.59	1.22		0.95	0.37	0.16	0.59	0.15	1.16	0.32	1	0.16	1.29	0.23	10.2	0.022	0.375615	North Atlantic Craton	[13798] Furnes et al., 2009
B-2	242719C	47.7805	17.2935	9.37115	12.0016	11.6215	0.0411015	1.21249	0.205508	0.236334	0.236334	2.32	100	74.2939	1031.88		1418	183	908	61.3	366	1.15	115	9.8	12.9	0.37	0.25	0.0241	0.37	1.03	0.2	1.07	0.41	0.15	0.74	0.14	1.2	0.31	0.97	0.15	1.2	0.21	10.1	0.052	0.651037	North Atlantic Craton	[13798] Furnes et al., 2009
B-2	242725	46.7257	15.1171	11.848	9.06819	15.4086	0.156169	0.989068	0.239459	0.218636	0.229047	3.69	100	75.1915	1000.07		1311.82	184	1343	77.7	586	4.36	36.5	29		0.3	0.14	0.0147	0.32	0.96	0.18	0.83	0.38	0.11	0.59	0.11	0.98	0.28	0.83	0.17	0.98	0.14	7.93	0.022	0.421546	North Atlantic Craton	[13798] Furnes et al., 2009
B-2	242670	50.0404	18.7222	10.837	9.42175	8.89608	0.0808734	1.24343	0.232511	0.313385	0.212293	1.01	100	65.6723	926.912		1880.31	209	254	62.7	177	4.87	74.3	11	25.7	0.67	0.79	0.0647	2.08	4.53	0.59	2.62	0.82	0.29	1.07	0.22	1.54	0.43	1.29	0.25	1.65	0.27	13.3	0.43	0.365958	North Atlantic Craton	[13798] Furnes et al., 2009
B-2	242671B	49.7136	18.2896	11.1848	9.06442	9.62717	0.0200985	1.43704	0.190936	0.291428	0.180886	0.4	100	66.7326	789.785		1748.57	211	271	62.3	160	1.5	53.8	3.7	24	0.68	0.64	0.0602	1.9	4.24	0.56	2.75	0.86	0.29	1.16	0.23	1.68	0.45	1.36	0.23	1.54	0.26	13.6	0.26	0.324559	North Atlantic Craton	[13798] Furnes et al., 2009
B-2	810381	49.2153	17.9508	10.5396	7.66427	12.9189	0.151868	0.971955	0.131619	0.273362	0.182242	1.15	100	74.0704	795.703		1640.17	207	255	68	210	10.01	48.4	8.4	14.5	0.43	0.43	0.0718	0.85	1.82	0.23	1.15	0.55	0.16	0.73	0.16	1.35	0.37	1.19	0.2	1.37	0.23	11.1	0.14	0.487435	North Atlantic Craton	[13798] Furnes et al., 2009
B-2	242790A	50.0858	17.7724	11.4006	8.17934	9.81521	0.0201959	2.01959	0.171665	0.323134	0.212057	0.91	100	66.7378	925.882		1938.81	217	217	67.9	112	0.71	65.9	12	20.3	0.51	0.45	0.0468	0.96	2.51	0.38	1.73	0.69	0.21	0.98	0.2	1.56	0.4	1.24	0.22	1.32	0.23	12.5	0.14	0.451657	North Atlantic Craton	[13798] Furnes et al., 2009
B-2	242744	51.3023	18.2732	11.8335	7.55742	8.25472	0.153815	1.84578	0.174323	0.399918	0.205086	2.42	100	61.9148	895.447		2399.51	233	55.6	45.4	59.1	3.28	84.1	22	23.4	0.75	0.55	0.048	1.25	3.21	0.47	2.31	0.86	0.21	1.15	0.22	2.06	0.49	1.53	0.27	1.91	0.27	15.6	0.18	0.423955	North Atlantic Craton	[13798] Furnes et al., 2009
B-2	242733	49.9692	17.852	11.223	8.83864	9.56835	0.102775	1.69579	0.154162	0.36999	0.226105	2.64	100	66.5205	987.218		2219.94	230	106	53.7	122	0.97	56.8	4.8	19.3	0.54	0.39	0.0315	0.57	1.88	0.33	1.91	0.64	0.22	1.05	0.22	1.56	0.41	1.28	0.23	1.36	0.22	13.3	0.043	0.65926	North Atlantic Craton	[13798] Furnes et al., 2009
B-2	242718	49.5384	16.8695	10.4595	7.48007	13.9005	0.0629459	1.07008	0.167856	0.230802	0.220311	4.62	100	75.5931	961.919		1384.81	177	878	70.3	403	2.38	58.8	15	12.8	0.4	0.26	0.0314	0.61	1.64	0.23	1.24	0.43	0.15	0.7	0.15	1.25	0.33	1.08	0.16	1.28	0.18	10	0.063	0.410687	North Atlantic Craton	[13798] Furnes et al., 2009
B-2	242742	48.7376	20.2401	9.01283	8.35058	11.2583	0.103477	1.73841	0.13452	0.217301	0.206954	3.29	100	74.4319	903.6		1303.81	198	359	44.8	149	1.24	72.8	10	15.3	0.46	0.39	0.0318	1.02	2.47	0.31	1.35	0.54	0.17	0.64	0.17	1.27	0.27	0.99	0.18	1.14	0.19	9.54	0.17	0.36841	North Atlantic Craton	[13798] Furnes et al., 2009
B-2	242689	49.2373	18.0119	11.1425	9.42519	9.4656	0.10102	1.89918	0.222245	0.303061	0.191939	0.95	100	66.4403	838.042		1818.37	238	363	65.9	174	6.78	52.5	1.5	21.2	0.65	0.4	0.0487	1.13	3.32		1.96	0.69	0.27	1.13	0.21	1.66	0.4	1.21	0.19	1.58	0.26	12.9	0.23	0.341074	North Atlantic Craton	[13798] Furnes et al., 2009
AUK	498210	48.4855	9.42717	11.1367	9.52714	19.7241	0.19994	0.909727	0.159952	0.39988	0.029991	3.82	100	80.4975	130.947	35	2399.28	178	2377	74	658	1	38	4.3	20.72		0.65	0.04	0.75	2.41		2.1	0.73	0.19	1.08	0.2	1.35	0.31	0.92	0.13	0.94	0.14	8	0.11	0.835063	North Atlantic Craton	[13799] Ordonez-Calderon et al., 2009
B-1	498235	51.2154	14.6044	11.3134	13.9042	6.26188	0.340102	1.30039	0.210063	0.790237	0.060018	1.2	100	56.3302	262.05	50	4741.42	285	319	45	138	12	50	17.95	42.5		1.39	0.07	1.72	4.58	0.74	4.02	1.56	0.61	2.5	0.46	3.1	0.72	2.07	0.3	2.11	0.33	18.9	0.15	0.77867	North Atlantic Craton	[13799] Ordonez-Calderon et al., 2009
B-2	498264	50.9153	18.6156	6.86206	9.47284	10.8433	0.230069	2.63079	0.130039	0.260078	0.040012	1.5	100	78.6443	174.7	27	1560.47	124	99	44	167	12	106	27.69	28.6		0.83	0.04	3.33	6.12	0.83	3.61	0.86	0.36	1.08	0.17	1.19	0.27	0.84	0.13	0.87	0.14	7.3	0.37	0.24016	North Atlantic Craton	[13799] Ordonez-Calderon et al., 2009
B-2	498206	50.095	14.8985	12.2788	12.0788	7.12929	0.789921	1.80982	0.209979	0.659934	0.049995	1.24	100	57.5034	218.288	47	3959.6	279	307	54	171	56	101	91.84			0.47	0.03	1.21	3.04	0.54	2.78	1.29	0.47	2.15	0.42	2.97	0.7	2.12	0.32	2.14	0.32	18.7	0.08	0.374265	North Atlantic Craton	[13799] Ordonez-Calderon et al., 2009
B-2	498218	48.1096	16.0332	12.9426	10.2821	8.66173	0.35007	2.70054	0.20004	0.65013	0.070014	1.08	100	60.9325	305.695	43	3900.78	240	244	48	149	7	77	51.91	36.3		0.75	0.05	1.59	3.74	0.58	3.08	1.27	0.5	2.07	0.43	3.03	0.72	2.18	0.32	2.33	0.35	19.2	0.43	0.454497	North Atlantic Craton	[13799] Ordonez-Calderon et al., 2009
B-2	498228	53.284	15.1854	10.4469	7.57773	10.7468	0.319904	1.86944	0.209937	0.319904	0.039988	2.68	100	70.5658	174.596	46	1919.42	223	456	47	124	10	74	50.48	22.5		0.46	0.03	2.06	4.19	0.55	2.52	0.68	0.31	1.3	0.24	1.97	0.44	1.43	0.22	1.52	0.25	12.6	0.1	0.215158	North Atlantic Craton	[13799] Ordonez-Calderon et al., 2009
B-2	498219	49.2901	14.927	13.2573	10.3679	8.43831	0.439912	2.29954	0.209958	0.719856	0.04999	0.97	100	59.7321	218.266	54	4319.14	285	301	45	100	11	83	55.65	31.5		0.77	0.06	2.2	5.2	0.74	3.66	1.36	0.55	2.35	0.49	3.54	0.82	2.45	0.37	2.45	0.38	21.4	0.43	0.337237	North Atlantic Craton	[13799] Ordonez-Calderon et al., 2009
B-2	498271	47.9	14.6	12.67	10.17	11.2	0.61	1.9	0.2	0.7	0.05	1.78	100	67.3214	218.31	28	4200	206	196	68	433	23	65	57.91	44.9		1.49	0.08	2.91	7.23	1.07	5.35	1.61	0.62	2.16	0.39	2.61	0.57	1.56	0.23	1.58	0.22	14.4	0.35	0.493356	North Atlantic Craton	[13799] Ordonez-Calderon et al., 2009
B-2	498237	49.2803	15.5738	12.7249	10.7157	7.98681	0.059976	2.42903	0.189924	0.959616	0.079968	0.66	100	59.3948	349.156	38	5757.7	266	238	46	147	2	78	25.38	54.2		1.7	0.11	2.68	7.42	1.21	6.11	2.18	0.83	3.02	0.51	3.51	0.77	2.23	0.33	2.15	0.32	19.8	0.46	0.611197	North Atlantic Craton	[13799] Ordonez-Calderon et al., 2009
B-2	498278	51.6	13.83	13.1	11.38	7.42	0.21	1.25	0.2	0.94	0.07	0.46	100	56.897	305.634	48	5640	305	257	48	89	3	72	21.09	58.1		1.96	0.12	3.39	8.68	1.3	6.68	2.19	0.8	3.19	0.53	3.69	0.81	2.35	0.34	2.14	0.33	20	0.44	0.557088	North Atlantic Craton	[13799] Ordonez-Calderon et al., 2009
B-2	498244	50.075	15.8621	11.3043	13.6232	5.54723	0.05997	2.61869	0.1999	0.65967	0.049975	2.87	100	53.3498	218.201	47	3958.02	234	238	58	161	1	94	13.9	36.9		0.69	0.03	1.45	3.91	0.61	3.22	1.32	0.6	2.26	0.47	3.17	0.73	2.24	0.33	2.3	0.35	19.5	0.22	0.458509	North Atlantic Craton	[13799] Ordonez-Calderon et al., 2009
B-2	498229	48.076	16.2319	12.6937	10.6147	8.38581	0.129935	2.78861	0.21989	0.7996	0.05997	1.28	100	60.6237	261.841	40	4797.6	247	263	54	190	5	69	32.57	45.7		1.35	0.09	2.14	6.15	1	4.85	1.77	0.68	2.43	0.44	2.88	0.6	1.85	0.27	1.8	0.26	16.4		0.607837	North Atlantic Craton	[13799] Ordonez-Calderon et al., 2009
B-2	498261	50.5253	15.5478	12.7564	10.4152	6.33317	0.410205	2.51126	0.2001	1.2006	0.10005	0.07	100	53.6398	436.838	45	7203.6	323	219	45	100	6	104	173.98	67.2		2.54	0.17	3.37	9.57	1.53	7.75	2.53	0.97	3.65	0.62	4.29	0.94	2.69	0.39	2.5	0.38	23.6	0.32	0.726225	North Atlantic Craton	[13799] Ordonez-Calderon et al., 2009
B-2	498259	52.4843	13.5659	13.226	11.0767	6.83795	0.29991	1.22963	0.19994	0.9997	0.079976	0.58	100	54.6461	349.191	51	5998.2	307	211	47	79	6	88	28.83	53.2		2.08	0.15	3.5	9.19	1.35	6.87	2.16	0.82	3.26	0.59	3.68	0.78	2.42	0.36	2.39	0.36	20.9	0.41	0.572615	North Atlantic Craton	[13799] Ordonez-Calderon et al., 2009
B-2	498211	47.2189	16.1565	15.7163	10.2841	6.34254	0.130052	2.81112	0.240096	1.0104	0.090036	0.35	100	48.4671	393.115	48	6062.42	297	143	52	78	4	94	31.73	60.1		1.21	0.08	2.46	6.7	1.02	5.55	2.05	0.78	3.58	0.67	4.85	1.06	3.39	0.51	3.31	0.53	29.5	0.29	0.473934	North Atlantic Craton	[13799] Ordonez-Calderon et al., 2009
B-2	498227	53.9892	13.0874	9.84803	14.0672	6.60868	0.189962	1.29974	0.209958	0.64987	0.04999	1.84	100	60.9972	218.266	40	3899.22	244	351	39	138	6	47	33.84	30.6		0.78	0.06	1.57	4.32	0.66	3.3	1.31	0.54	2.04	0.39	2.61	0.59	1.71	0.24	1.73	0.26	15.2	0.16	0.478699	North Atlantic Craton	[13799] Ordonez-Calderon et al., 2009
B-2	498273	52.4843	13.5459	10.077	14.2957	6.9979	0.189943	1.55953	0.19994	0.609817	0.039988	0.58	100	61.8088	174.596	35	3658.9	227	603	48	120	4	111	35.85	35.3		1.15	0.06	1.91	5.29	0.81	4.18	1.42	0.54	2	0.35	2.37	0.53	1.53	0.21	1.4	0.22	13.3	0.19	0.580138	North Atlantic Craton	[13799] Ordonez-Calderon et al., 2009
B-2	498260	48.9804	15.6138	12.495	10.8057	8.28669	0.139944	2.38904	0.19992	1.0096	0.079968	0.28	100	60.7163	349.156	42	6057.58	264	251	51	166	1	136	41.61	57.3		1.77	0.12	2.55	7.31	1.15	6.17	1.99	0.68	3.12	0.53	3.59	0.76	2.26	0.33	2.07	0.33	20	0.24	0.668806	North Atlantic Craton	[13799] Ordonez-Calderon et al., 2009
B-2	498281	49.2098	14.7029	13.1126	11.8824	7.13143	0.260052	2.41048	0.210042	1.0002	0.080016	0.53	100	55.8979	349.366	39	6001.2	282	187	52	135	5	128	43.51	57.1		2	0.14	3.21	8.82	1.31	7.02	2.37	0.81	3.19	0.57	3.79	0.83	2.4	0.35	2.26	0.33	21	0.33	0.600333	North Atlantic Craton	[13799] Ordonez-Calderon et al., 2009
B-2	498274	50.5051	15.3015	12.1412	11.2411	7.9908	0.180018	1.63016	0.190019	0.760076	0.060006	1.5	100	60.534	261.998	38	4560.46	237	244	50	156	4	160	46.44	45.2		1.33	0.09	2.58	7.06	1.04	5.53	1.66	0.6	2.59	0.43	3	0.63	1.78	0.27	1.73	0.27	16.3	0.19	0.496706	North Atlantic Craton	[13799] Ordonez-Calderon et al., 2009
B-2	498224	48.5903	15.7968	12.0376	12.4675	7.87842	0.4999	1.83963	0.209958	0.619876	0.059988	1.01	100	60.4004	261.919	44	3719.26	251	263	53	150	18	87	36.29	31.5		0.59	0.05	1.89	4.74	0.62	3.58	1.28	0.48	2.28	0.45	3.18	0.73	2.23	0.32	2.22	0.35	19.5	0.1	0.300786	North Atlantic Craton	[13799] Ordonez-Calderon et al., 2009
B-2	498265	49.0245	15.5578	13.3767	9.09455	9.34467	0.18009	2.16108	0.190095	1.0005	0.070035	1.37	100	61.9488	305.787	41	6003	277	238	48	155	11	44	38	55.4		1.79	0.13	2.42	7.18	1.11	6.06	2.08	0.8	3.09	0.54	3.58	0.8	2.25	0.33	2.23	0.32	20.3	0.26	0.712697	North Atlantic Craton	[13799] Ordonez-Calderon et al., 2009
HMA	498279	55.3	10.59	13.42	11.29	6.34	0.74	0.95	0.25	1	0.12	0.98	100	52.4035	523.944	18	6000	152	229	56	130	11	411	63.15	86.6		5.2	0.33	11.85	33.16		19.97	4.2	1.18	4.1	0.56	3.04	0.57	1.49	0.22	1.27	0.2	14.7	1.23	0.422817	North Atlantic Craton	[13799] Ordonez-Calderon et al., 2009
B-2	499705OC	53.9838	14.6956	8.19754	15.1954	5.89823	0.059982	1.20964	0.179946	0.529841	0.049985	0.37	100	62.6423	218.244	42	3179.05	228	486	50	158	1.5	104	29	39	1.1	1.65	0.1	3.77	7.99	1.08	5.12	1.54	0.54	2.07	0.37	2.56	0.56	1.67	0.24	1.64	0.25	15	0.57	0.421706	North Atlantic Craton	[13810] Polat et al., 2009
B-2	499710MA	52.8158	14.0042	10.6032	11.9036	7.80234	0.130039	1.95059	0.20006	0.550165	0.040012	0.61	100	63.1662	174.7	46	3300.99	245	714	76	289	2.6	126	103	58	1.5	1.48	0.09	2.57	6.14	0.89	4.29	1.39	0.49	1.99	0.36	2.44	0.55	1.64	0.25	1.63	0.25	14.6	0.51	0.554876	North Atlantic Craton	[13810] Polat et al., 2009
B-2	499710A	51.0796	17.493	8.89644	14.3942	5.89764	0.139944	1.28948	0.169932	0.579768	0.059976	0.5	100	60.7063	261.867	47	3478.61	132	734	67	266	2.2	105	36	40	1.1	1.16	0.08	3.09	7.06	0.97	4.55	1.42	0.52	2	0.36	2.51	0.54	1.66	0.24	1.61	0.24	14.5	0.67	0.361715	North Atlantic Craton	[13810] Polat et al., 2009
B-2	499710B	48.0567	11.8893	14.0873	12.9883	10.6904	0.209811	1.22889	0.259766	0.559496	0.029973	0.81	100	63.8798	130.868	48	3356.98	153	726	117	334	2.9	45	31	38	1.1	0.95	0.08	2.31	5.71	0.82	4.04	1.3	0.39	1.83	0.33	2.25	0.49	1.5	0.22	1.49	0.23	12.8	0.62	0.396259	North Atlantic Craton	[13810] Polat et al., 2009
B-2	499713A	51.5	15.8	10	12.5	7.7	0.16	1.52	0.18	0.59	0.05	0.8	100	64.2152	218.31	49	3540	139	645	76	285	1.6	70	28	44	1.3	1.18	0.08	2.6	6.29	0.88	4.17	1.33	0.48	1.91	0.35	2.45	0.54	1.63	0.24	1.6	0.24	14.2	0.68	0.437296	North Atlantic Craton	[13810] Polat et al., 2009
B-2	499705MA	48.6659	12.9909	13.2907	13.2907	9.49335	0.159888	1.22914	0.229839	0.59958	0.049965	0.63	100	62.4715	218.157	42.7	3597.48	239	443	56	124	2	71	33	32	0.9	1.61	0.11	2.71	7.13	1.07	5.34	1.65	0.51	2.2	0.39	2.59	0.56	1.69	0.25	1.59	0.24	14.7	0.5	0.572432	North Atlantic Craton	[13810] Polat et al., 2009
B-2	499713B	48.3387	15.8127	11.7094	12.3098	9.00721	0.2502	1.69135	0.220176	0.610488	0.05004	0.85	100	64.1923	218.485	47	3662.93	147	555	88	294	2.5	63	39	40	1.2	1.12	0.09	2.4	6.35	0.92	4.46	1.44	0.51	2.08	0.38	2.65	0.58	1.76	0.25	1.71	0.25	15.5	0.63	0.449649	North Atlantic Craton	[13810] Polat et al., 2009
HMA	499714MA	54.7219	14.906	9.30372	12.405	6.5026	0.160064	1.22049	0.170068	0.560224	0.05002	0.59	100	61.9605	218.397	47.9	3361.34	249	593	63	303	1.5	69	31	71	1.8	1.34	0.09	3.12	6.59	0.93	4.42	1.46	0.54	1.99	0.37	2.51	0.57	1.69	0.25	1.64	0.25	15.5	0.55	0.413826	North Atlantic Craton	[13810] Polat et al., 2009
HMA	499713MA	55.2	15.5	8.9	12.2	5.9	0.15	1.39	0.15	0.56	0.05	0.57	100	60.7063	218.31	38.5	3360	231	581	60	284	1.2	62	39	35	1	1.36	0.09	2.34	5.05	0.71	3.33	1.04	0.39	1.45	0.26	1.83	0.4	1.22	0.18	1.17	0.18	10.8	0.4	0.560003	North Atlantic Craton	[13810] Polat et al., 2009
HMA	499713OC	56.5226	14.6058	7.40296	14.2057	5.10204	0.05002	1.36054	0.180072	0.520208	0.05002	0.5	100	61.6293	218.397	43	3121.25	223	614	59	258	2.1	100	44	45	1.1	1.61	0.09	3.17	6.96	0.97	4.52	1.4	0.54	1.99	0.35	2.41	0.54	1.6	0.23	1.57	0.24	14.7	0.55	0.489366	North Atlantic Craton	[13810] Polat et al., 2009
HMA	485456B	55.9224	14.5058	8.5034	13.5054	5.60224	0.180072	1.0004	0.180072	0.55022	0.05002	0.55	100	60.5583	218.397	46	3301.32	131	684	84	309	2.1	110	40	37	1.1	1.02	0.08	2.4	5.79	0.83	4.05	1.31	0.48	1.86	0.34	2.35	0.51	1.53	0.22	1.48	0.22	13.1	0.58	0.409502	North Atlantic Craton	[13810] Polat et al., 2009
HMA	485456A	55.8	15.8	8	13.1	5.2	0.2	1.18	0.16	0.51	0.05	0.52	100	60.2358	218.31	44	3060	129	653	76	294	2	122	46	37	1	0.94	0.07	2.57	6.08	0.84	4.05	1.27	0.45	1.8	0.33	2.26	0.49	1.47	0.21	1.4	0.21	12.6	0.59	0.352421	North Atlantic Craton	[13810] Polat et al., 2009
HMA	499708C	54.8506	13.8875	9.59137	11.09	7.59317	0.189829	2.03817	0.169847	0.539514	0.049955	0.64	100	64.8504	218.114	46	3237.09	129	674	77	283	2.4	76	58	38	1	1.08	0.08	2.71	6.33	0.86	4.09	1.3	0.48	1.87	0.34	2.35	0.51	1.54	0.22	1.5	0.22	13.6	0.61	0.383992	North Atlantic Craton	[13810] Polat et al., 2009
B-2	497141	47.9048	15.5016	11.6012	13.1013	7.70077	0.80008	2.40024	0.20002	0.730073	0.060006	0.56	100	60.7377	261.998	37	4380.44	229	230	54	209	14.6	103	30	23.1		1.35	0.12	2.27	5.61	0.91	4.76	1.63	0.6	2.32	0.41	2.75	0.6	1.81	0.27	1.8	0.27	21.1	0.35	0.573027	North Atlantic Craton	[13997] Polat et al., 2009
B-2	497102	52.3948	17.6982	11.9988	8.69913	4.59954	0.19998	3.29967	0.189981	0.869913	0.049995	2.4	100	47.1838	218.288	48	5219.48	291	348	67	266	4.9	119	129	60.4		1.23	0.09	2.6	6.31	0.97	5.09	1.81	0.6	2.65	0.48	3.25	0.71	2.13	0.31	2.09	0.32	22.5	0.21	0.455826	North Atlantic Craton	[13997] Polat et al., 2009
B-2	497134	47.757	16.3853	11.3897	11.1899	9.09182	0.49955	2.69757	0.169847	0.759317	0.059946	0.75	100	65.0388	261.736	34	4555.9	213	255	54	225	2.9	134	31	35.3		1.19	0.08	2.48	5.88	0.88	4.54	1.53	0.57	2.1	0.36	2.43	0.52	1.55	0.23	1.49	0.22	17.1	0.58	0.462341	North Atlantic Craton	[13997] Polat et al., 2009
B-2	478813	47.3668	14.4899	13.0908	15.4892	6.9951	0.19986	1.49895	0.169881	0.649545	0.049965	0.21	100	55.4626	218.157	39	3897.27	229	349	57	160	4	96	15	40.9		1.38	0.2	2.48	6	0.91	4.71	1.61	0.62	2.3	0.41	2.78	0.61	1.86	0.27	1.81	0.28	15.8		0.53616	North Atlantic Craton	[13997] Polat et al., 2009
B-2	478812	51.5794	15.5938	9.89604	12.1951	6.09756	0.59976	2.89884	0.179928	0.84966	0.109956	0.3	100	58.9485	480.09	41	5097.96	265	271	47	80	5	113	83	58.2		1.93	0.11	4.9	11.09	1.57	7.56	2.25	0.76	2.82	0.48	3.22	0.67	1.97	0.28	1.81	0.27	18.3	0.75	0.379515	North Atlantic Craton	[13997] Polat et al., 2009
B-2	497147	50.085	15.3954	10.6968	10.9967	8.09757	0.79976	2.9991	0.19994	0.669799	0.059982	0.73	100	63.8233	261.893	37	4018.79	221	252	50	178	11.7	93	66	33.2		2.39	0.25	5.17	10.65	1.35	5.98	1.71	0.59	2.24	0.4	2.64	0.56	1.71	0.25	1.66	0.25	16.1	1.4	0.445425	North Atlantic Craton	[13997] Polat et al., 2009
B-2	497133	47.562	16.5867	10.8913	12.8897	8.39329	0.39968	2.498	0.179856	0.559552	0.039968	0.67	100	64.2344	174.508	38	3357.31	206	277	56	194	7	122	36	27.2		0.72	0.05	1.39	3.58	0.56	2.99	1.13	0.45	1.65	0.3	2.09	0.46	1.37	0.2	1.37	0.21	13.1	0.17	0.499097	North Atlantic Craton	[13997] Polat et al., 2009
B-2	497124	46.9577	16.0855	11.7894	15.0864	6.79389	0.39964	1.79838	0.259766	0.769308	0.059946	2.55	100	57.3197	261.736	39	4615.85	242	247	60	232	12.7	130	97	35.9		1.16	0.08	2.13	5.54	0.87	4.56	1.62	0.59	2.37	0.42	2.9	0.64	1.94	0.28	1.91	0.29	19.5	0.3	0.524742	North Atlantic Craton	[13997] Polat et al., 2009
B-2	478864	49.6596	14.2171	14.7177	9.81177	7.80937	0.400481	2.0024	0.220264	1.0813	0.0800961	0.86	100	55.2891	349.715	45	6487.79	320	222	50	111	5	264	104	71.6		1.97	0.12	3.5	8.77	1.31	6.76	2.33	0.81	3.25	0.61	4.07	0.87	2.65	0.39	2.52	0.39	24.9	0.33	0.542332	North Atlantic Craton	[13997] Polat et al., 2009
B-2	497125	47.1036	16.6366	10.924	17.6388	5.11124	0.10022	1.40309	0.250551	0.771698	0.0601323	1.75	100	52.1627	262.549	39	4630.19	241	227	57	228	4	165	20	46.8		1.2	0.09	2.05	5.49	0.86	4.54	1.6	0.61	2.3	0.42	2.83	0.62	1.88	0.28	1.84	0.27	20.4	0.18	0.56402	North Atlantic Craton	[13997] Polat et al., 2009
B-2	478810	47.7239	14.4072	13.8069	13.1066	6.70335	0.70035	2.30115	0.230115	0.94047	0.08004	0.28	100	53.0841	349.471	40	5642.82	283	221	54	120	5	99	39	59.2		2.03	0.1	3.67	9.51	1.43	7.19	2.35	0.74	3.14	0.55	3.74	0.8	2.4	0.35	2.33	0.35	21.6	0.52	0.532963	North Atlantic Craton	[13997] Polat et al., 2009
B-2	478858	49.9499	14.1141	14.9149	10.8108	7.10711	0.1001	1.5015	0.21021	1.2012	0.0900901	0.29	100	52.618	393.351	44	7207.21	318	231	50	80	4	64	18	85.2		2.12	0.13	3.55	9.47	1.46	7.57	2.59	0.87	3.65	0.67	4.62	0.99	3.03	0.44	2.9	0.44	27.8	0.39	0.575406	North Atlantic Craton	[13997] Polat et al., 2009
B-2	497107	48.8365	15.1803	12.3839	12.3839	6.49156	0.599221	2.79636	0.19974	1.04864	0.0798961	0.38	100	54.9881	348.842	41	6291.82	293	251	52	202	7.8	102	17	60.2		2.01	0.14	3.48	9.26	1.42	7.34	2.4	0.87	3.36	0.59	3.92	0.83	2.52	0.36	2.42	0.37	26.1	0.44	0.556524	North Atlantic Craton	[13997] Polat et al., 2009
B-2	497120	50.7695	15.3908	11.3932	14.7911	5.09694	0.09994	1.39916	0.219868	0.779532	0.059964	0.39	100	51.0426	261.815	37	4677.19	220	167	57	164	4.5	153	17	34.1		1.43	0.11	2.4	6.19	0.92	4.66	1.56	0.61	2.13	0.38	2.53	0.54	1.64	0.24	1.59	0.24	16.1	0.78	0.574106	North Atlantic Craton	[13997] Polat et al., 2009
B-2	478862	48.7244	14.9075	13.8069	11.3057	8.30415	0.2001	1.50075	0.2001	0.970485	0.08004	0.54	100	58.3624	349.471	41	5822.91	277	241	52	121	7	47	34	61.3		1.64	0.11	2.75	7.45	1.16	6.03	2.09	0.71	2.96	0.53	3.6	0.78	2.37	0.35	2.24	0.34	22.1	0.3	0.574617	North Atlantic Craton	[13997] Polat et al., 2009
B-2	497132	46.9812	17.393	10.4958	12.0952	9.59616	0.29988	2.39904	0.169932	0.529788	0.039984	0.94	100	68.0587	174.578	33	3178.73		223	57	245	7.3	108	39	29.3		0.77	0.06	1.35	3.7	0.58	3.06	1.09	0.45	1.58	0.29	1.95	0.42	1.28	0.18	1.23	0.19	13.1	0.14	0.549571	North Atlantic Craton	[13997] Polat et al., 2009
B-2	478861	47.8	15.9	13.8	11.9	7.8	0.1	1.5	0.22	0.91	0.07	0.33	100	56.8452	305.634	42	5460	271	150	55	130	2	60	32	52.2		1.65	0.07	2.35	6.6	1.06	5.64	1.92	0.7	2.82	0.51	3.42	0.74	2.22	0.32	2.14	0.33	18.7	0.32	0.676524	North Atlantic Craton	[13997] Polat et al., 2009
B-2	497118	48.3097	13.5027	11.1022	10.202	14.3029	0.40008	1.60032	0.190038	0.360072	0.030006	1.34	100	75.0147	131.012	32	2160.43	131	656	73	421	22	92	44	21.3		0.63	0.04	1.56	3.86	0.54	2.68	0.84	0.32	1.14	0.2	1.33	0.29	0.86	0.12	0.81	0.12	8.1	0.18	0.38912	North Atlantic Craton	[13997] Polat et al., 2009
B-2	478857	48.722	14.7764	13.8778	11.3818	8.1869	0.299521	1.59744	0.189696	0.898562	0.0698882	1.08	100	57.8917	305.146	39	5391.37	254	243	54	121	4	59	36	53.6		1.52	0.12	2.53	6.99	1.09	5.72	2.02	0.72	2.89	0.52	3.5	0.76	2.29	0.34	2.2	0.33	21.3	0.24	0.578882	North Atlantic Craton	[13997] Polat et al., 2009
B-2	497131	46.9188	16.2065	14.2057	10.104	8.0032	0.20008	2.90116	0.20008	1.17047	0.090036	0.54	100	56.7653	393.115	41	7022.81	298	177	56	193	3.8	151	36	68.4		1.75	0.06	3.4	9.19	1.4	7.21	2.47	0.86	3.39	0.6	4.08	0.88	2.69	0.39	2.63	0.4	28.2	0.38	0.495937	North Atlantic Craton	[13997] Polat et al., 2009
B-2	478859	49.8249	14.2071	13.907	11.3057	7.90395	0.2001	1.4007	0.18009	0.990495	0.08004	0.55	100	56.9805	349.471	41	5942.97	280	231	50	101	2	45	15	63.4		1.69	0.11	2.97	8.09	1.24	6.47	2.26	0.79	3.28	0.59	3.96	0.86	2.59	0.38	2.48	0.38	23.1	0.31	0.548274	North Atlantic Craton	[13997] Polat et al., 2009
B-2	497109	48.3661	15.8889	12.891	12.0915	7.79454	0.09993	1.89867	0.189867	0.729489	0.049965	0.62	100	58.4914	218.157	41	4376.94	252	246	60	241	3.4	131	40	35.2		0.96	0.07	1.74	4.79	0.73	3.87	1.41	0.55	2.1	0.39	2.67	0.58	1.77	0.26	1.76	0.26	17.1	0.18	0.531605	North Atlantic Craton	[13997] Polat et al., 2009
B-2	497122	48.3532	15.3168	15.417	10.5116	5.70628	0.10011	3.0033	0.220242	1.26139	0.110121	0.28	100	46.3112	480.811	40	7568.33	290	182	58	189	3.4	151	16	74.2		2.52	0.18	4.95	12.77	1.82	9.14	2.93	1.01	3.98	0.69	4.62	1	3.05	0.44	2.98	0.45	32.1	0.25	0.490527	North Atlantic Craton	[13997] Polat et al., 2009
B-2	497123	50.5646	16.4885	11.5919	14.0901	4.89657	0.09993	1.29909	0.169881	0.749475	0.049965	2.6	100	49.6078	218.157	39	4496.85	211	241	59	220	2.2	156	19	33.9		1.52	0.07	2.7	7.27	1.08	5.42	1.82	0.74	2.53	0.45	3.06	0.66	2	0.29	1.93	0.29	22.6	0.73	0.542434	North Atlantic Craton	[13997] Polat et al., 2009
B-2	478811	47.2622	15.1878	12.5899	15.0879	6.69464	0.29976	1.69864	0.219824	0.899281	0.059952	0.2	100	55.3419	261.762	42	5395.68	268	311	56	150	3	117	20	54.1		1.74	0.12	2.61	7.53	1.19	6.12	2.02	0.73	2.78	0.5	3.37	0.73	2.18	0.32	2.09	0.32	20.4		0.642356	North Atlantic Craton	[13997] Polat et al., 2009
HMA	497126	58.2933	16.226	7.3117	7.51202	5.10817	0.200321	4.00641	0.0801282	1.0016	0.260417	1.22	100	61.9505	1137.03	16	6009.62	115	239	37	232	1.3	305	51	134.6		5.84	0.37	17.21	43.88	5.6	23.07	4.5	1.32	3.84	0.55	3.06	0.58	1.68	0.22	1.4	0.22	17.2	2.39	0.326963	North Atlantic Craton	[13997] Polat et al., 2009
B-2	493111	51.4751	15.4615	12.1712	9.84098	6.84068	0.210021	2.47025	0.190019	1.15012	0.190019	0.65	100	56.7068	829.66	34.34	6900.69	121.06	96.16	35.78	93.96	2.68	108.82	39.42	60.6		2.3	0.15	5.7	13.93	2.13	10.4	3.2	1.2	4.27	0.75	5.12	1.09	3.21	0.48	3.12	0.5	27.94	0.57	0.388795	North Atlantic Craton	[14913] Ordonez-Calderon et al., 2011
B-2	485491	49.15	15.55	12.89	11.76	7.93	0.12	1.55	0.2	0.78	0.07	0.62	100	58.9109	305.634	43.33	4680	184.34	73.42	54.27	157.99	1.35	112.68	3.87	43.33		1.15	0.08	2.49	6.29	0.97	4.97	1.73	0.67	2.59	0.47	3.36	0.72	2.18	0.32	2.1	0.32	18.29	0.44	0.445006	North Atlantic Craton	[14913] Ordonez-Calderon et al., 2011
B-2	485497	46.59	15.39	13.04	11.34	9.94	0.34	2.14	0.26	0.83	0.13	0.98	100	63.983	567.606	36.75	4980	122.8	139.1	58.36	189.43	14.2	60.23	124.39	46.96		0.98	0.06	2.47	6.69	1.02	5.23	1.59	0.74	2.29	0.35	2.43	0.53	1.55	0.22	1.47	0.23	12.97	0.2	0.382293	North Atlantic Craton	[14913] Ordonez-Calderon et al., 2011
B-2	493108	47.6148	14.1214	16.3616	11.0911	5.85059	0.20002	2.33023	0.230023	1.92019	0.280028	0.18	100	45.4547	1222.66	40.08	11521.2	206.97	45.61	51.35	110.87	2.55	116.67	21.12	129.25		4.59	0.31	6.65	18.65	2.78	13.72	4.21	1.59	5.52	0.96	6.25	1.31	3.91	0.55	3.74	0.54	32.98	0.99	0.665056	North Atlantic Craton	[14913] Ordonez-Calderon et al., 2011
B-2	485494	49.0649	14.2214	15.1015	10.111	5.58056	0.510051	2.58026	0.210021	2.30023	0.320032	0.18	100	46.2714	1397.32	37.27	13801.4	223.35	15.75	37.87	59.22	4.54	120.71	174.49	150.1		6.22	0.41	10.61	28.88	4.09	19.44	5.71	1.87	7.24	1.23	7.87	1.67	4.96	0.71	4.63	0.69	41.75	1.39	0.564862	North Atlantic Craton	[14913] Ordonez-Calderon et al., 2011
B-2	485490	49.835	14.2814	14.2314	8.68087	7.74077	0.290029	2.66027	0.190019	1.87019	0.220022	0.45	100	55.9007	960.659	41.5	11221.1	223.79	50.28	47.38	91.1	9.36	102.23	98.47	118.42		4.21	0.29	8.14	22.44	3.1	14.51	4.36	1.09	5.62	0.97	6.41	1.33	3.94	0.59	3.8	0.59	34.01	1.19	0.498339	North Atlantic Craton	[14913] Ordonez-Calderon et al., 2011
B-2	493110	52.48	13.61	12.54	10.71	5.61	0.18	2.69	0.22	1.8	0.16	0.22	100	51.0426	698.592	42.44	10800	223.13	53.81	45.94	81.4	2.06	90.87	25.02	107.12		4.58	0.28	7.91	21.58		13.85	4.11	1.43	5.29	0.93	6.28	1.31	3.92	0.56	3.64	0.55	33.76	1.03	0.5579	North Atlantic Craton	[14913] Ordonez-Calderon et al., 2011
B-1	508949	47.8569	15.8857	11.4897	10.4906	10.1908	0.269757	2.79748	0.169847	0.78929	0.059946	0.83	100	67.3954	261.736	29	4735.74	221	217	55	368	3.7	76	15	46		1.8	0.1	2.15	6.21	0.98	5.18	1.77	0.61	2.49	0.44	2.99	0.64	1.94	0.28	1.85	0.28	20	0.41	0.80668	North Atlantic Craton	[15563] Polat et al., 2009
B-2	508954	48.5437	14.7132	12.7114	12.5113	6.80613	0.660595	2.70243	0.220198	1.05095	0.0800721	0.32	100	55.5126	349.61	41	6305.68	300	213	47	159	4.1	95	32	54		1.88	0.12	3.4	7.46	1.22	6.23	2.06	0.69	2.85	0.51	3.36	0.72	2.17	0.31	2.09	0.31	22	0.43	0.532778	North Atlantic Craton	[15563] Polat et al., 2009
B-2	508951	49.0441	14.9134	12.3111	12.0108	7.80703	0.350315	2.40216	0.190171	0.900811	0.0700631	0.46	100	59.6429	305.909	39	5404.86	273	269	51	204	4.9	100	32	46		1.64	0.1	3.05	6.88	1.12	5.7	1.82	0.65	2.58	0.44	2.94	0.62	1.87	0.26	1.77	0.27	19	0.43	0.518097	North Atlantic Craton	[15563] Polat et al., 2009
B-2	508946	47.9952	14.4986	13.4987	13.0987	6.29937	0.59994	2.59974	0.219978	1.10989	0.079992	0.22	100	52.0973	349.261	41	6659.33	313	209	45	159	5.5	111	52	58		2.23	0.15	3.51	8.62	1.34	6.79	2.24	0.76	3.11	0.55	3.57	0.77	2.3	0.34	2.27	0.34	24	0.76	0.61216	North Atlantic Craton	[15563] Polat et al., 2009
B-2	508959	48.6854	14.8955	12.4963	11.6965	7.09787	1.07968	2.69919	0.219934	1.04969	0.079976	0.74	100	56.9656	349.191	42	6298.11	301	212	46	170	4.6	117	62	57		1.81	0.11	3.41	8.25	1.22	6.16	2.03	0.76	2.83	0.5	3.4	0.72	2.16	0.31	2.08	0.31	23	0.87	0.511436	North Atlantic Craton	[15563] Polat et al., 2009
B-2	508069	47.6476	15.3153	14.2142	10.8108	8.50851	0.22022	2.002	0.22022	0.990991	0.0700701	0.53	100	58.2467	305.94	43	5945.95	285	209	58	163	1.6	45	39	41		1.54	0.09	2.3	6.22	1.02	5.45	1.92	0.7	2.87	0.51	3.45	0.75	2.19	0.32	2.12	0.31	22	0.24	0.645149	North Atlantic Craton	[15563] Polat et al., 2009
B-2	508947	48.8902	14.997	13.4973	11.1978	6.9986	0.4999	2.59948	0.19996	1.03979	0.079984	0.34	100	54.7185	349.226	43	6238.75	307	188	45	130	4.6	80	24	53		1.85	0.11	2.79	7.37	1.14	5.99	2.03	0.7	2.82	0.49	3.31	0.7	2.1	0.3	2.06	0.3	23	0.59	0.638903	North Atlantic Craton	[15563] Polat et al., 2009
B-2	508958	49.4346	15.0105	13.1092	10.8076	7.50525	0.380266	2.40168	0.20014	1.07075	0.080056	0.51	100	57.1598	349.54	42	6424.5	309	219	48	174	6.3	101	21	56		1.82	0.12	2.75	7.36	1.15	5.96	2.04	0.72	2.87	0.5	3.32	0.72	2.16	0.32	2.1	0.31	23	0.51	0.637685	North Atlantic Craton	[15563] Polat et al., 2009
B-2	508074	47.5857	16.695	13.0961	9.79706	8.9973	0.339898	2.39928	0.19994	0.829751	0.059982	0.47	100	61.5548	261.893	36	4978.51	246	224	61	231	3.9	94	133	42		1.34	0.08	2.09	5.55	0.86	4.48	1.59	0.61	2.29	0.41	2.77	0.6	1.76	0.26	1.72	0.26	17	0.38	0.617768	North Atlantic Craton	[15563] Polat et al., 2009
B-2	508066	47.2	15.2	14.6	10.8	8.4	0.28	2.3	0.24	0.92	0.06	0.74	100	57.2802	261.972	41	5520	270	235	60	181	2.4	41	41	39		1.49	0.08	2.47	6.78	1.05	5.42	1.89	0.7	2.81	0.49	3.32	0.72	2.1	0.3	2.01	0.3	20	0.43	0.581241	North Atlantic Craton	[15563] Polat et al., 2009
B-2	508948	47.0282	16.0096	11.607	10.8065	10.2061	0.420252	2.90174	0.180108	0.790474	0.05003	0.96	100	67.2049	218.441	31	4742.85	228	228	55	364	4	67	16	38		1.36	0.08	1.83	5.1	0.8	4.23	1.48	0.54	2.11	0.37	2.48	0.53	1.6	0.23	1.52	0.23	16	0.45	0.716069	North Atlantic Craton	[15563] Polat et al., 2009
B-2	508078	48.9098	13.6027	15.8032	10.102	7.60152	0.290058	2.10042	0.240048	1.26025	0.090018	0.47	100	52.8524	393.036	51	7561.51	356	186	48	98	2.9	48	19	48		2.09	0.13	3.63	9.88	1.51	7.84	2.66	0.92	3.9	0.7	4.79	1.04	3.09	0.45	2.96	0.45	31	0.39	0.554762	North Atlantic Craton	[15563] Polat et al., 2009
B-2	508077	52.9424	15.7126	10.6085	12.2098	5.40432	0.0800641	1.70136	0.210168	1.05084	0.0800641	0.35	100	54.2802	349.575	47	6305.04	328	184	50	181	0.9	50	27	44		1.46	0.1	2.13	5.94	0.92	4.9	1.84	0.67	2.97	0.56	3.98	0.88	2.62	0.38	2.48	0.37	26	0.31	0.660451	North Atlantic Craton	[15563] Polat et al., 2009
B-2	508079	46.1815	16.3934	14.4942	12.1951	7.29708	0.129948	1.89924	0.219912	1.09956	0.089964	0.37	100	53.9867	392.801	51	6597.36	347	271	58	191	1.6	48	29	47		1.48	0.09	2.45	7.1	1.14	6.13	2.26	0.84	3.5	0.66	4.68	1.02	3.11	0.45	3.07	0.46	30	0.36	0.582053	North Atlantic Craton	[15563] Polat et al., 2009
B-2	508071	45.8092	15.7031	13.8028	11.3023	9.80196	0.530106	2.0004	0.210042	0.780156	0.060012	0.88	100	62.3351	262.024	35	4680.94	229	235	69	259	4.5	88	55	40		1.25	0.08	1.76	5.21	0.85	4.53	1.6	0.64	2.35	0.42	2.87	0.62	1.81	0.26	1.77	0.26	18	0.27	0.684328	North Atlantic Craton	[15563] Polat et al., 2009
B-2	508075	46.4861	16.4951	14.1957	12.7962	6.19814	0.159952	2.09937	0.249925	1.22963	0.089973	0.54	100	50.4347	392.84	46	7377.79	336	253	65	187	0.6	50	23			1.97	0.12	2.56	7.9	1.33	7.32	2.68	0.88	3.99	0.72	4.91	1.06	3.18	0.46	3.03	0.45	32	0.25	0.74147	North Atlantic Craton	[15563] Polat et al., 2009
B-2	508073	47.5095	15.3031	14.2028	10.102	8.60172	0.460092	2.60052	0.220044	0.930186	0.070014	0.63	100	58.5308	305.695	38	5581.12	263	256	59	197	3.2	88	67	36		1.56	0.1	3.94	9.73	1.28	5.84	1.84	0.66	2.56	0.46	3.09	0.66	1.96	0.28	1.9	0.29	19	0.49	0.381501	North Atlantic Craton	[15563] Polat et al., 2009
B-2	508064	52.0896	14.4971	12.7974	9.998	6.59868	0.629874	2.09958	0.279944	0.939812	0.069986	0.56	100	54.5798	305.573	39	5638.87	264	188	47	121	3.3	66	123	70		1.87	0.14	6.59	15.64		7.36	2.03	0.74	2.79	0.48	3.27	0.72	2.13	0.31	2.04	0.3	21	0.83	0.273416	North Atlantic Craton	[15563] Polat et al., 2009
ADK	JEH-2007-24	50.1962	6.82258	13.4198	8.87141	18.8492	0.409765	0.655624	0.225371	0.512206	0.0379032	2.51	100	76.5993	165.493	20.4	3073.24	114	1223	76.2	817		20.2	34.8	44.9	1.3	1.2	0.0842	3.35	7.92	1.14	5.44	1.65	0.514	2.01	0.334	2.12	0.422	1.11	0.159	1	0.146	10.1	0.532	0.345147	North Atlantic Craton	[15680] Hoffmann et al., 2011
ADK	JEH-2007-26	48.6341	7.39859	14.7972	9.46813	18.005	0.0724338	0.724338	0.248344	0.620861	0.031043	3.48	100	73.9292	135.54	25.7	3725.17	134	1548	82.1	709		20	3.65	41.3	1.25	1.16	0.0819	3.3	8.41	1.25	6.15	1.91	0.441	2.35	0.396	2.51	0.499	1.33	0.19	1.2	0.17	11.8	0.502	0.338697	North Atlantic Craton	[15680] Hoffmann et al., 2011
B-2	JEH-2007-23	52.9602	13.8511	10.8976	9.06434	10.3883	0.142585	1.73139	0.162954	0.753664	0.0478678	1.59	100	68.9595	209	36.5	4521.98	188	527	40	82		75	5.1	54.6	1.65	2.09	0.151	3.78	9.7	1.46	2.26	7.17	0.76	2.87	0.505	3.34	0.697	1.95	0.295	1.94	0.289	17	0.63	0.532748	North Atlantic Craton	[15680] Hoffmann et al., 2011
B-2	JEH-2007-20	52.0148	9.43148	12.5483	10.6256	12.7507	0.131555	1.46734	0.212512	0.77921	0.0384545	0.97	100	70.3096	167.9	30.4	4675.26	154	1141	55.6	319		131	21.9	62.9	1.86	2.13	0.16	6.55	16	2.28	10.6	2.93	0.967	3.29	0.528	3.24	0.645	1.71	0.247	1.59	0.233	15.3	0.96	0.313333	North Atlantic Craton	[15680] Hoffmann et al., 2011
B-2	JEH-2007-08	46.6378	13.0058	17.7813	9.98801	9.51046	0.243858	1.44283	0.27434	1.05672	0.0589323	1.62	100	55.486	257.31	35.1	6340.3	237	323	48.4	87		35.5	17.2	77	2.23	3.31	0.254	5	13.9	2.19	10.7	3.31	1.04	3.99	0.69	4.49	0.91	2.4	0.35	2.22	0.327	21.1	1.12	0.63786	North Atlantic Craton	[15680] Hoffmann et al., 2011
HMA	JEH-2007-14	54.5723	14.1746	11.9472	8.97052	5.19399	0.283493	3.74615	0.19237	0.850478	0.0688482	1.55	100	50.3272	300.605	26.8	5102.87	185	63.1	38.9	46.2		90.2	21.9	66.9	1.97	2.42	0.177	6.18	14.7	2.1	9.8	2.74	0.89	3.25	0.549	3.5	0.726	1.98	0.294	1.92	0.283	17.5	0.838	0.377306	North Atlantic Craton	[15680] Hoffmann et al., 2011
HMA	JEH-2007-19	54.4543	8.66824	12.0224	9.53709	12.7296	0.121234	1.52553	0.191954	0.707199	0.042432	1.07	100	71.1615	185.266	27.5	4243.2	151	1036	52.3	273		162	44.8	58.6	1.68	2.01	0.155	4.93	13	1.89	8.93	2.52	0.821	2.86	0.465	2.88	0.572	1.52	0.219	1.4	0.205	14	0.849	0.392841	North Atlantic Craton	[15680] Hoffmann et al., 2011
HMA	JEH-2007-21	54.0032	8.29263	12.3378	10.3152	12.7423	0.141581	1.23378	0.202259	0.687681	0.0434857	0.96	100	70.6479	189.867	27.2	4126.09	156	986	53	283		90	35.2	55.6	1.65	1.84	0.14	5.67	13.5	2.03	9.48	2.62	0.887	2.96	0.479	2.93	0.583	1.55	0.228	1.45	0.209	14	0.828	0.312681	North Atlantic Craton	[15680] Hoffmann et al., 2011
B-1	468794	50.4978	15.5831	9.21373	12.3527	10.2194	0.0101585	1.4933	0.152377	0.46729	0.0101585	1.2	100	72.105	44.3539	40	2803.74	186		40.9	20.6	0.1	88.7	11	23.8	1	2.2	0.1	2.7	5.5	0.8	2.9	0.94	0.38	1.36	0.28	1.61	0.32	0.97	0.16	0.98	0.15	10.7	0.2	0.785102	North Atlantic Craton	[16158] Szilas et al., 2012
B-1	468779	49.4164	11.8032	19.6518	9.30771	5.54438	0.271684	1.55967	0.271684	2.00241	0.171061	0.4	100	39.6683	746.884	47	12014.5	413		67.1	2.8	6.8	50	41	117	3	4.5	0.3	5.4	14.1	2.21	11.6	3.69	1.17	4.57	0.89	5.64	1.22	3.73	0.56	3.66	0.57	36.7	0.5	0.802945	North Atlantic Craton	[16158] Szilas et al., 2012
B-1	510944	48.2529	14.795	15.098	9.65462	7.90749	0.181781	2.51464	0.19188	1.31287	0.0908907	0.7	100	54.9669	396.847	46	7877.2	335		57.3	29.9	1.1	130.9	51	78.7	2.6	3.5	0.3	4.4	11.7	1.81	9.5	3.02	1.03	4.08	0.78	4.68	1.01	2.95	0.46	2.85	0.42	27.6	0.5	0.766448	North Atlantic Craton	[16158] Szilas et al., 2012
B-1	510818	47.5888	13.408	18.523	9.84665	5.6699	0.514528	2.60291	0.232042	1.51332	0.100888	0.6	100	41.6354	440.496	45	9079.9	382		61.5	14.6	4.5	555.9	29	73.4	2	3.5	0.3	4.5	12.3	1.82	9.6	2.84	0.96	3.74	0.74	4.69	1.01	3.07	0.44	2.83	0.43	27.3	0.4	0.749416	North Atlantic Craton	[16158] Szilas et al., 2012
B-1	510825	47.608	15.1209	15.5153	11.4089	7.01932	0.485486	1.58794	0.202286	0.991201	0.0606857	0.8	100	51.3227	264.966	40	5947.2	289		65.2	32	12.4	382.7	85	63.7	1.8	3.6	0.4	3.9	10.6	1.5	7.4	2.4	0.87	3.18	0.61	3.97	0.82	2.44	0.37	2.34	0.37	20.7	0.4	0.889416	North Atlantic Craton	[16158] Szilas et al., 2012
B-1	508256	47.3013	15.3519	14.7949	10.6937	7.28101	0.587342	2.23797	0.222785	1.40759	0.121519	0.9	100	53.4213	530.576	44	8445.57	304		40.9	25	6.1	277.3	98	58.5	1.9	4.2	0.2	3.2	9.7		7.5	2.38	0.97	3.23	0.62	3.67	0.85	2.4	0.38	2.43	0.38	20.7	0.3	1.26464	North Atlantic Craton	[16158] Szilas et al., 2012
B-1	511181	48.0985	15.4545	14.8795	10.7737	7.53556	0.151316	1.91668	0.18158	0.94825	0.0605266	0.6	100	54.1339	264.271	39	5689.5	249		58.2	35.7	2.1	164.2	33	54.4	1.7	2.5	0.1	3.2	9.5		6	2.2	0.76	2.98	0.57	3.51	0.77	2.32	0.34	2.09	0.34	18.5	0.2	0.752761	North Atlantic Craton	[16158] Szilas et al., 2012
B-1	510939	47.3108	11.4213	12.8528	9.88753	16.6155	0.0715746	0.99182	0.204499	0.593047	0.0511247	1.6	100	75.0796	223.221	33	3558.28	201		87.7	59.5	0.7	15	7	35.9	1.1	1.8	0.2	1.9	5.8		4.2	1.26	0.49	1.77	0.31	1.94	0.42	1.35	0.19	1.31	0.18	12.3	0.2	0.912822	North Atlantic Craton	[16158] Szilas et al., 2012
B-2	511152	48.335	15.7201	11.7875	12.002	8.6619	0.531154	2.09397	0.183861	0.653728	0.0306435	1.8	100	63.1341	133.796	36	3922.37	232		53.7	56	18.3	167.6	55	32.6	1	1.1	0.1	2.5	5.2		4.4	1.34	0.55	2.04	0.36	2.45	0.54	1.66	0.24	1.64	0.25	14.9	0.3	0.423955	North Atlantic Craton	[16158] Szilas et al., 2012
B-2	468774	46.9111	16.6599	13.7735	10.9176	7.31213	0.638039	2.74458	0.202552	0.789953	0.050638	1.1	100	55.3017	221.096	33	4739.72	206		54	36.7	5.1	162.8	56	36.8	1.2	2.3	0.2	3	6.7	1.08	5.4	1.73	0.62	2.41	0.43	2.73	0.56	1.83	0.26	1.61	0.24	15.3	0.2	0.73871	North Atlantic Craton	[16158] Szilas et al., 2012
B-2	468775	47.1947	17.4397	10.7859	12.8216	9.25663	0.141787	1.62042	0.172169	0.50638	0.0607656	0.9	100	66.6675	265.315	37	3038.28			63.2	17.2	1.6	107.7	34	31.7	0.9	1	0.1	2	4.5	0.72	3.8	1.14	0.5	1.52	0.25	1.84	0.36	1.11	0.17	1.16	0.16	11.6	0.3	0.481767	North Atlantic Craton	[16158] Szilas et al., 2012
B-2	510827	47.5197	15.1643	15.7592	10.728	7.2192	0.110909	2.19802	0.221819	1.00827	0.0705787	0.5	100	51.6344	308.161	40	6049.61	269		60.1	23.7	1.3	218.4	44	54.2	1.7	2.3	0.2	4	9.4	1.53	8	2.32	0.81	3.07	0.58	3.51	0.76	2.26	0.38	2.25	0.36	20.8	0.6	0.554032	North Atlantic Craton	[16158] Szilas et al., 2012
B-2	511158	49.0552	14.7977	13.7605	9.61183	7.69152	0.872869	2.84453	0.21565	1.07825	0.0718833	2.3	100	56.5717	313.857	38	6469.5	275		53.5	64.9	16.3	261.4	186	60.8	2.1	2.6	0.2	5.6	12.1	1.77	9.3	2.55	0.88	3.42	0.65	4.3	0.9	2.48	0.4	2.64	0.37	23.4	0.3	0.447355	North Atlantic Craton	[16158] Szilas et al., 2012
B-2	512148	47.1613	13.8514	19.0759	8.70747	7.44916	0.301993	1.83209	0.231528	1.27844	0.110731	0.4	100	47.6457	483.473	33	7670.63	258		65.2	33	2	126.6	28	89.5	2.6	4.1	0.3	6.6	15.4	2.3	11.7	3.46	1.04	4.39	0.84	5.29	1.17	3.3	0.53	3.14	0.55	29	0.5	0.598559	North Atlantic Craton	[16158] Szilas et al., 2012
B-2	510810	48.2029	15.3488	13.8807	12.1393	6.64169	0.485978	2.23752	0.202491	0.809963	0.0506227	1	100	52.721	221.029	39	4859.78	257		61.1	30.2	1.8	238.4	45	45.2	1.4	2.2	0.1	3.6	8.6	1.27	5.9	1.94	0.69	2.56	0.49	3.01	0.64	1.97	0.3	1.84	0.28	17.8	0.3	0.588827	North Atlantic Craton	[16158] Szilas et al., 2012
B-2	510942	48.4017	14.3491	17.5658	9.85177	5.69729	0.27226	2.10749	0.231925	1.40163	0.121004	0.6	100	43.0483	528.329	47	8409.8	378		61.7	13	2.1	113.3	42	83.7	2.5	3.5	0.2	5.3	13.2	2.02	9.8	3.32	1.04	4.47	0.84	5.31	1.13	3.36	0.51	3.32	0.49	31.3	0.7	0.636296	North Atlantic Craton	[16158] Szilas et al., 2012
B-2	510938	50.7035	15.4364	11.9902	10.053	8.63581	0.112153	2.04935	0.173328	0.785073	0.0611746	1.6	100	62.6659	267.1	43	4710.44	267		57.2	30.7	0.7	133.5	33	48.4	1.4	1.9	0.1	3.9	9.2	1.33	6.5	1.89	0.68	2.5	0.46	2.95	0.6	1.75	0.27	1.69	0.24	16.9	0.4	0.469414	North Atlantic Craton	[16158] Szilas et al., 2012
B-2	510811	48.073	15.2845	14.8709	10.4419	7.22357	0.161421	2.6937	0.211864	0.968523	0.0706215	0.6	100	53.0967	308.347	40	5811.14	272		62.7	25.1	1.1	250.6	51	56.4	1.5	2.5	0.2	4.1	9.8	1.42	7.4	2.23	0.78	2.94	0.54	3.36	0.75	2.27	0.33	2.12	0.33	20.1	0.5	0.587521	North Atlantic Craton	[16158] Szilas et al., 2012
B-2	511184	52.4479	15.092	12.4823	10.8133	6.38276	0.0809225	1.65891	0.17196	0.809225	0.0606919	0.9	100	54.3731	264.993	46	4855.35	283		51.4	18.2	2.5	156.3	27	50	1.4	1.9	0.2	3.1	7.8	1.15	5.8	1.9	0.69	2.43	0.5	3.02	0.66	2.08	0.32	1.9	0.31	18.3	0.2	0.590553	North Atlantic Craton	[16158] Szilas et al., 2012
B-2	515809	53.5613	15.3003	10.4302	9.73011	6.80804	0.466721	2.58726	0.152192	0.821834	0.142045	1.1	100	60.3359	620.198	28	4931.01	175		47.3	22.3	14.7	244	104	82.3	2.3	3.5	0.2	9.8	22.8	3.05	12.5	2.81	0.88	2.89	0.52	3.01	0.67	1.89	0.3	1.81	0.28	17.9	1.3	0.344119	North Atlantic Craton	[16158] Szilas et al., 2012
B-2	511185	49.2993	15.4955	12.9045	9.71872	8.87186	0.30245	2.49017	0.18147	0.695635	0.0403266	0.5	100	61.5713	176.074	35	4173.81	223		67.3	40.1	5.3	101.9	23	39.8	1.1	1.7	0.1	2.7	6.9	1.01	5	1.66	0.62	2.23	0.43	2.48	0.56	1.69	0.27	1.58	0.26	15.6	0.2	0.60667	North Atlantic Craton	[16158] Szilas et al., 2012
B-2	515804	49.1049	15.2625	12.8047	9.82098	9.39618	0.101143	2.4072	0.171943	0.859715	0.0708	0.8	100	63.1015	309.127	42	5158.29	249		48.5	19.6	0.5	126.6	31	62.7	2	1.7	0.1	4.5	12	1.82	7.6	2.54	0.8	3.24	0.63	3.59	0.81	2.38	0.38	2.49	0.37	23	0.6	0.364002	North Atlantic Craton	[16158] Szilas et al., 2012
B-2	512150	46.5583	16.2352	16.8272	9.33173	6.63255	0.270921	2.72928	0.180614	1.15392	0.0802729	0.1	100	47.8781	350.487	30	6923.54	242		70.7	34.2	2.4	301.6	54	70.4	2.4	3.4	0.2	5.1	13.3	1.95	9.6	3.24	1.08	4.01	0.76	4.61	0.92	2.95	0.46	2.58	0.41	24.3	1	0.642356	North Atlantic Craton	[16158] Szilas et al., 2012
B-2	511192	53.8251	16.2654	10.1493	8.99116	5.46581	0.345423	3.66758	0.132074	0.995631	0.162552	1.3	100	55.6554	709.734	30	5973.79	176		37.1	19.4	9.1	265.1	84	111.7	2.9	4.7	0.4	14.5	31.9	3.93	16.7	3.59	1.07	3.69	0.61	3.46	0.7	2.12	0.31	1.94	0.31	19.9	1.9	0.312318	North Atlantic Craton	[16158] Szilas et al., 2012
B-2	468792	48.877	17.6143	12.8693	10.4512	6.13112	0.111291	2.72157	0.19223	0.930797	0.101174	0.9	100	52.613	441.744	33	5584.78	219		72.6	16.9	1.7	124.8	29	84.4	2.4	3.1	0.2	6.8	16.6	2.26	9.7	2.59	0.73	2.72	0.41	3.19	0.63	1.83	0.27	1.91	0.28	18.8	1.1	0.439258	North Atlantic Craton	[16158] Szilas et al., 2012
B-2	511194	50.5395	14.5155	11.9401	9.4259	9.23249	0.223941	2.86034	0.152687	0.95684	0.152687	1.4	100	64.3114	666.663	26	5741.04			59.1	56	1.1	175.9	34	105.9	3	4.8	0.3	16.2	35.7	4.29	18.2	3.61	1.03	3.54	0.59	3.34	0.7	1.99	0.3	1.84	0.29	19.3	1.6	0.285492	North Atlantic Craton	[16158] Szilas et al., 2012
B-2	511183	47.2776	13.0252	19.5327	8.55309	7.69077	0.300812	1.85501	0.24065	1.40379	0.120325		100	47.8516	525.362	38	8422.74	334		88.9	41.6	3	155.6	24	98.6	2.9	4.4	0.3	6.5	17.4	2.53	12.8	3.77	1.16	4.88	0.93	5.48	1.24	3.61	0.6	3.49	0.58	33.8	0.6	0.652239	North Atlantic Craton	[16158] Szilas et al., 2012
B-2	510802	47.8895	15.4773	14.1917	9.35317	9.40379	0.151837	2.41927	0.192327	0.860411	0.0607349	0.9	100	60.6956	265.181	40	5162.47	261		61	24.1	3.2	83.8	56	45.8	1.3	1.9	0.1	2.9	7.7	1.11	5.8	1.93	0.72	2.61	0.5	3.07	0.66	2	0.31	1.91	0.29	18.6	0.2	0.631281	North Atlantic Craton	[16158] Szilas et al., 2012
B-2	510823	48.2581	14.9854	14.1371	11.7843	6.80602	0.464506	2.4639	0.212057	0.828032	0.0605877	0.7	100	52.874	264.538	40	4968.19	262		60.6	35.9	5.9	252.3	45	46.9	1.4	2.1	0.2	3.5	9	1.25	6.1	1.88	0.68	2.57	0.49	3.12	0.66	1.95	0.3	1.92	0.29	17.5	0.4	0.578121	North Atlantic Craton	[16158] Szilas et al., 2012
B-2	510929	53.7431	14.5894	10.7406	10.4181	8.39295	0.120907	1.00756	0.161209	0.745592	0.0806045	0.4	100	64.553	351.935	35	4473.55	213		49.3	17	0.1	161.9	11	62	1.9	2.5	0.2	6.2	15.1	1.98	9.3	2.18	0.7	2.5	0.46	2.84	0.61	1.9	0.27	1.75	0.25	16.2	0.9	0.388522	North Atlantic Craton	[16158] Szilas et al., 2012
B-2	510812	46.7493	15.1598	15.6738	10.5131	7.41861	0.937406	2.25784	0.231831	0.987804	0.0705574	0.5	100	52.4501	308.068	40	5926.82	268		61.9	34.4	7.2	185.1	84	57.9	1.8	2.7	0.2	4.6	12	1.67	7.7	2.52	0.87	3.25	0.61	3.83	0.81	2.42	0.36	2.35	0.35	22.7	0.4	0.565553	North Atlantic Craton	[16158] Szilas et al., 2012
B-2	512149	46.7157	14.9708	18.7286	9.79246	5.28914	0.272013	2.32722	0.211566	1.5817	0.11082	0.5	100	39.6921	483.862	39	9490.23	426		59.3	12.6	4.7	118	29	76.8	2.2	3.5	0.2	5.1	13.8	1.97	10.7	2.91	1.11	4.01	0.76	4.34	0.99	2.9	0.46	2.71	0.4	25.4	0.4	0.661249	North Atlantic Craton	[16158] Szilas et al., 2012
B-2	511155	51.6471	13.8399	15.5431	8.2101	5.78276	0.234574	2.7129	0.234574	1.67262	0.122387	1.7	100	46.4397	534.364	48	10035.7	396		48.3	20.9	4	137	64	71.5	2.1	3.6	0.3	4.7	13.2	1.93	9.6	3.3	1.08	4.08	0.75	4.68	1.02	3.02	0.48	3.05	0.45	28.1	0.7	0.738026	North Atlantic Craton	[16158] Szilas et al., 2012
B-2	508259	48.0996	16.1179	12.3984	14.3801	5.86382	0.243902	1.60569	0.23374	0.985772	0.0711382	1.3	100	52.4311	310.603	38	5914.63	248		52.2	60.5	6.3	172.9	40	57.5	1.7	2.5	0.2	3.4	10.1	1.52	7.5	2.29	0.83	3.25	0.6	3.69	0.76	2.24	0.36	2.32	0.35	21.6	0.2	0.708481	North Atlantic Craton	[16158] Szilas et al., 2012
B-2	510924	48.9816	15.5273	12.0589	10.9296	8.48961	0.120992	2.6215	0.131075	1.03852	0.100827	0.5	100	62.1313	440.23	36	6231.09	227		48.9	12.5	0.1	128.7	26	97.3	2.9	5.2	0.4	8.8	23.2	3.05	13.4	3.53	1.05	4.17	0.78	4.83	1.04	3.16	0.46	3.03	0.46	28.2	1.2	0.569361	North Atlantic Craton	[16158] Szilas et al., 2012
B-2	511175	48.5504	15.0896	15.2909	9.60338	6.83511	0.301993	2.86893	0.181196	1.18784	0.0905979	0.4	100	51.0223	395.568	40	7127.04	274		54.8	18.6	5.3	251	34	67.4	2.1	3.2	0.2	4.3	12.1		8.3	2.62	0.96	3.79	0.73	4.64	0.95	2.89	0.46	2.72	0.45	24.1	0.7	0.717049	North Atlantic Craton	[16158] Szilas et al., 2012
B-2	511176	50.4282	14.8212	15.7078	9.09824	5.21914	0.523929	2.49874	0.211587	1.4005	0.0906801	0.5	100	43.6411	395.927	41	8403.02	312		55.5	33.2	7.2	187.4	67	79.8	2.3	4	0.4	6.9	17.8		10.6	3.07	1.06	4.27	0.78	4.94	1.07	3.14	0.47	2.95	0.5	27.9	0.8	0.558571	North Atlantic Craton	[16158] Szilas et al., 2012
B-2	468795	47.1307	14.2798	12.3807	9.29063	14.5673	0.0307977	1.41669	0.164254	0.667283	0.0718612	2.1	100	73.2771	313.76	29	4003.7	152		66.9	105.7	0.6	113.4	12	40.4	1.1	1.8	0.1	3.6	9.9		6.9	1.47	0.6	1.96	0.36	2.19	0.46	1.41	0.2	1.3	0.21	13.1	0.4	0.481767	North Atlantic Craton	[16158] Szilas et al., 2012
B-2	511166	50.7377	13.1669	16.3703	8.95311	5.50728	0.404204	2.7789	0.262732	1.68755	0.131366	0.8	100	43.947	573.571	49	10125.3	397		51.7	15.1	10.7	87.3	78	77.1	2.5	3.4	0.3	5	14.3		9.4	3.02	1.03	4.3	0.78	4.87	1.05	3.07	0.49	3.23	0.46	27.8	0.5	0.655203	North Atlantic Craton	[16158] Szilas et al., 2012
B-2	468796	46.2767	12.3107	13.213	8.78448	17.3927	0.0933416	0.96453	0.186683	0.684505	0.0933416	3	100	75.4161	407.548	25	4107.03	139		77.2	49.9	0.6	7.2	3	42.8	1.4	2	0.1	3.3	9.1		6.3	1.53	0.6	1.82	0.35	2.12	0.46	1.53	0.24	1.47	0.23	13.2	0.4	0.58396	North Atlantic Craton	[16158] Szilas et al., 2012
B-2	508257	48.173	16.149	13.7942	11.622	6.15104	0.517661	1.93869	0.203004	1.29923	0.152253	1.2	100	50.9613	664.768	37	7795.37	241		44.4	81.2	15.8	204.9	102	80	2.3	3.7	0.3	6.1	17.3		10.6	3.04	1.06	3.87	0.69	4.22	0.91	2.6	0.39	2.47	0.38	21.6	1	0.584439	North Atlantic Craton	[16158] Szilas et al., 2012
B-2	468758	53.4385	16.343	10.5481	9.34466	6.03762	0.0910194	2.83172	0.131472	1.03155	0.202265	0.9	100	57.1542	883.13	25	6189.32	197		47.9	5.1	0.6	356.1	23	119.9	3.3	5.8	0.4	10.2	26.4		14.4	3.23	1.03	3.41	0.59	3.42	0.68	2.14	0.31	1.96	0.31	20.3	1.6	0.547892	North Atlantic Craton	[16158] Szilas et al., 2012
B-2	508254	47.6417	15.3318	14.2713	12.6755	6.17109	0.1919	2.3028	0.202	1.111	0.101	0.7	100	50.1927	440.985	38	6665.99	257		49.3	19.2	10.2	262	28	59.1	2	2.5	0.2	3.5	10.5		7	2.43	0.87	3.24	0.63	3.83	0.85	2.53	0.37	2.26	0.38	21.1	0.3	0.688239	North Atlantic Craton	[16158] Szilas et al., 2012
B-2	511180	48.7565	15.3995	14.4554	10.4253	7.79616	0.121815	1.84753	0.192874	0.944067	0.0609075	1.2	100	55.6914	265.934	38	5664.4	238		56.2	25.1	2.6	171.9	20	53.2	1.4	2.4	0.2	3.2	9.6		7	2.09	0.79	2.96	0.53	3.12	0.7	2	0.34	2	0.34	18.9	0.7	0.722651	North Atlantic Craton	[16158] Szilas et al., 2012
B-2	510940	53.8114	16.4608	10.2039	9.82224	5.71457	0.160691	2.47062	0.130561	1.03445	0.190821	0.2	100	56.6193	833.16	27	6206.69	208		39	6.5	0.8	324.7	27	115.3	3.3	6.3	0.4	13.4	35.8		17.3	3.83	1.18	3.78	0.67	3.65	0.76	2.16	0.32	1.99	0.3	21.5	1.8	0.453005	North Atlantic Craton	[16158] Szilas et al., 2012
ADK	510760	49.1871	1.17606	10.4462	0.10377	38.8447		0.01153	0.0922403	0.12683	0.01153	11.9	100	89.6545	50.3424	6	760.982	30		141.6	1693.9	0.7	1.1	12	9	0.2	0.5		0.5	1.7		1	0.33	0.06	0.34	0.07	0.36	0.08	0.22	0.03	0.21	0.04	1.7		0.963534	North Atlantic Craton	[17073] Szilas et al., 2013
AUK	510784	45.7637	3.32082	13.7155	0.181963	36.7679			0.113727	0.136472		10.5	100	86.2022		13	818.833	109		114.8	1336.5	0.6	1.2		4.8	0.2	0.3		0.2	0.6	0.09	0.4	0.18	0.06	0.31	0.06	0.37	0.08	0.25	0.04	0.25	0.04	2		1.4453	North Atlantic Craton	[17073] Szilas et al., 2013
B-1	510687	48.4004	13.4863	11.5935	10.8734	12.7868	0.349758	1.65621	0.174879	0.637794	0.041148	2.4	100	71.9917	179.66	50	3826.77	225		60	94.3	7.2	82	77	44.1	1.4	2	0.2	2.5	6.4	0.99	4.5	1.52	0.55	2.18	0.39	2.52	0.57	1.66	0.24	1.53	0.25	15		0.770827	North Atlantic Craton	[17073] Szilas et al., 2013
B-1	510893	51.03	12.268	17.2547	10.2182	5.08872	0.193759	2.23333	0.224352	1.38691	0.101978	1.7	100	40.7339	445.258	45	8321.44	417		56.4	23.3	9.2	64.1	34	66.6	2.1	2.5	0.2	2.8	8.1	1.4	7.6	2.61	0.8	3.68	0.71	4.4	0.91	2.66	0.42	2.74	0.4	25.5	0.2	0.860299	North Atlantic Craton	[17073] Szilas et al., 2013
B-1	510638	50.463	13.2085	16.7192	8.54788	6.59408	0.244225	2.45243	0.213697	1.45517	0.10176	1.5	100	47.8936	444.306	54	8731.05	412		50.4	26.9	4.2	103.5	20	76.9	2.7	3.5	0.2	4.1	11.4	1.89	9.1	3.1	0.99	4.47	0.82	5.04	1.16	3.58	0.51	3.55	0.51	31	0.2	0.822529	North Atlantic Craton	[17073] Szilas et al., 2013
B-1	477610	49.5737	13.7821	15.7734	9.01634	6.57029	0.168728	3.04115	0.221266	1.67718	0.1758	1.695	100	49.2579	767.579	44.4662	10063.1	354.069	204.487	53.2858	67.351	3.75311	109.423	11.9908	105.938	2.78552	5.09336	1.30643	4.70777	12.5094	1.9539	9.98975	3.32135	1.16497	4.27239	0.744091	5.11751	1.16486	3.12424	0.487495	3.02738	0.468963	31.6712	0.638282	1.04245	North Atlantic Craton	[17073] Szilas et al., 2013
B-1	510746	49.014	15.2549	13.3544	10.5344	7.86758	0.56197	2.03331	0.21457	1.08307	0.0817411	1.8	100	57.8589	356.898	45	6498.42	293		44.6	45.8	160.8	71.7	39	55.9	1.7	2.8	0.1	3.1	8.5	1.36	6.5	2.27	0.85	3.32	0.62	4.04	0.81	2.68	0.37	2.41	0.37	22.9	0.3	0.870289	North Atlantic Craton	[17073] Szilas et al., 2013
B-1	510714	48.6849	17.3823	11.9139	9.49163	9.19014	0.114357	2.16239	0.166337	0.842083	0.0519805	3.5	100	64.2563	226.957	34	5052.5	247		52	130.8	2.7	160.7	32	45.3	1.5	2.2	0.1	2.6	7.1	1.13	6.4	1.87	0.71	2.68	0.48	3.13	0.67	1.95	0.3	1.97	0.3	18.2	0.2	0.815298	North Atlantic Craton	[17073] Szilas et al., 2013
B-1	510999	51.518	14.5078	14.9806	10.0536	7.05957		0.241622	0.210106	1.34468	0.0840424	4.5	100	52.3411	366.946	48	8068.07	342		42.4	63.7	0.3	203.6	6	70.8	2	3.1	0.2	3.7	10.4	1.68	9.5	2.84	0.93	4.08	0.73	4.64	1.01	2.95	0.43	2.89	0.43	27.4	0.3	0.807286	North Atlantic Craton	[17073] Szilas et al., 2013
B-1	512285	50.3604	15.1359	14.1166	10.0906	6.93987	0.0823723	1.81219	0.185338	1.17381	0.102965	2.6	100	53.3952	449.567	45	7042.83	331		42	58.7	1	114.7	10	66.5	1.9	2.8	0.1	3.5	9.7	1.54	8.3	2.66	1	3.66	0.69	4.33	0.94	2.75	0.42	2.62	0.41	25.6	0.4	0.770827	North Atlantic Craton	[17073] Szilas et al., 2013
B-1	510750-2	51.3626	14.8793	11.2631	15.3559	5.52274	0.217594	0.279764	0.207232	0.860015	0.0518081	3.3	100	53.3307	226.204	37	5160.09	265		43.7	65.1	18.5	95.7	34	48.4	1.6	2.1		2.6	7.2	1.14	6.4	1.97	0.74	2.88	0.52	3.28	0.71	2.22	0.33	2.16	0.32	20.4		0.778239	North Atlantic Craton	[17073] Szilas et al., 2013
B-1	510637	49.8012	14.7793	14.708	9.35684	7.2062	0.173275	2.40546	0.203853	1.27408	0.0917338	1.6	100	53.311	400.528	49	7644.48	356		45.8	46.6	1.7	107	12	69.1	2.2	3.1	0.2	3.8	10.7	1.72	8.7	2.92	0.99	3.93	0.74	4.54	1.04	3.08	0.45	3.03	0.45	27.7	0.3	0.786041	North Atlantic Craton	[17073] Szilas et al., 2013
B-1	510753	48.9955	16.2645	12.1656	11.6406	7.4003	0.161535	2.13024	0.201918	0.969207	0.0706714	0.7	100	58.6374	308.565	42	5815.24	289		46.9	39.2	6.9	103.5	27	53.9	1.7	2.4	0.2	2.9	8.2	1.32	7.2	2.22	0.84	3.18	0.58	3.76	0.79	2.38	0.36	2.39	0.36	22.2		0.797408	North Atlantic Craton	[17073] Szilas et al., 2013
B-1	510967	49.2284	15.4624	15.6157	9.34083	5.9581	0.327031	2.44251	0.214614	1.31834	0.0919775	1.9	100	47.0672	401.592	47	7910.07	352		55.2	61.8	7.4	99.7	36	74	2.4	3.2	0.2	4	11	1.7	9.1	3	1.04	4.31	0.78	4.94	1.06	3.27	0.47	3.08	0.46	28.6	0.3	0.770827	North Atlantic Craton	[17073] Szilas et al., 2013
B-1	477611	48.8147	13.4842	16.6549	9.27161	6.70749	0.162642	2.7107	0.185733	1.80513	0.202801	1.728	100	48.4156	885.468	46.7166	10830.8	376.151	174.836	53.4039	61.8159	3.11594	96.8431	9.13001	119.321	3.20414	5.36729	1.56377	4.70608	13.6042	2.17837	11.1587	3.79343	1.49016	4.78833	0.841811	5.66272	1.32685	3.57924	0.567036	3.51859	0.541194	36.0448	0.84203	1.09891	North Atlantic Craton	[17073] Szilas et al., 2013
B-1	512284	50.6187	14.1266	14.3535	8.17694	7.97072	0.103114	3.13467	0.195917	1.23737	0.0824912	2.7	100	56.4111	360.173	49	7424.21	350		44	44.8	0.6	68.1	13	66.7	2.2	2.7	0.2	3.3	9.2	1.42	7.9	2.49	0.82	3.51	0.69	4.11	0.91	2.75	0.41	2.6	0.4	25.5	0.3	0.788346	North Atlantic Craton	[17073] Szilas et al., 2013
B-1	477612	48.6414	13.5809	16.9697	8.58312	6.82374	0.133087	3.02471	0.19459	1.83499	0.213746	1.698	100	48.3771	933.258	48.225	11009.9	372.819	176.371	52.9922	61.651	2.21262	99.3266	7.36863	118.151	3.2398	5.5718	0.998276	4.75897	13.7956	2.17014	11.4089	3.86074	1.31668	5.02379	0.863759	5.82493	1.35761	3.58237	0.562654	3.61674	0.543641	35.6806	0.865537	1.12811	North Atlantic Craton	[17073] Szilas et al., 2013
B-1	512286	49.6033	14.8068	15.3529	8.61412	7.71767	0.113344	2.14323	0.216383	1.32921	0.10304	2.6	100	53.949	449.892	52	7975.27	393		44.4	44.6	1.5	96.1	12	73.5	2.5	3.1	0.2	3.8	10.9	1.69	9.3	2.95	1.01	4.02	0.79	4.76	1.07	3.1	0.49	2.91	0.45	30	0.3	0.786041	North Atlantic Craton	[17073] Szilas et al., 2013
B-1	510885	51.509	15.1966	11.9447	14.5377	5.72795	0.010627	0.0743889	0.170032	0.765143	0.063762	5.6	100	52.7759	278.397	40	4590.86	242		41.4	100.7	0.2	280.3	4	39.3	1.2	1.5	0.1	1.8	5.3	0.83	4.8	1.57	0.65	2.28	0.45	2.81	0.63	1.96	0.28	1.8	0.28	16.5	0.2	0.802945	North Atlantic Craton	[17073] Szilas et al., 2013
B-1	510901	51.1787	14.3093	14.5782	10.3081	6.64806	0.0516956	1.38544	0.186104	1.24069	0.11373	3	100	51.5216	496.569	49	7444.17	335		46	43.5	0.5	109.1	3	79.8	2.3	3.1	0.2	4	11.4	1.72	9.9	2.99	0.99	4.1	0.82	4.91	1.08	3.22	0.47	3.08	0.48	28.5	0.3	0.746739	North Atlantic Craton	[17073] Szilas et al., 2013
B-1	512283	50.3822	13.5868	15.4724	8.74529	6.73734	0.254816	3.14953	0.203853	1.36581	0.101926	1.6	100	50.3672	445.031	52	8194.88	381		45.8	33	5.2	75.3	42	70.7	2.2	2.9	0.2	3.5	10.3	1.6	9.5	2.86	0.98	3.9	0.75	4.41	0.97	2.99	0.46	2.82	0.44	27.3	0.3	0.798357	North Atlantic Craton	[17073] Szilas et al., 2013
B-1	510754-1	51.3693	15.8083	11.9048	11.2201	5.37503	0.500715	2.47292	0.194155	1.07296	0.0817494	1.9	100	51.2724	356.934	47	6437.77	284		49.5	62.8	41.5	103.2	90	53.7	1.7	2.1	0.1	2.7	8.1	1.28	6.7	2.32	0.81	3.08	0.61	3.71	0.82	2.48	0.36	2.25	0.35	21.5	0.3	0.749416	North Atlantic Craton	[17073] Szilas et al., 2013
B-1	512263	45.7204	18.0436	10.4732	11.5577	13.2589	0.0106326	0.446571	0.138224	0.318979	0.0318979	5.5	100	74.686	139.273	35	1913.88	140		62.2	164.4	0.1	130.5	2	13.4	0.3	0.7	0.1	0.9	2.8		2.1	0.77	0.37	1.1	0.2	1.37	0.28	0.8	0.12	0.71	0.11	6.5	0.2	0.749416	North Atlantic Craton	[17073] Szilas et al., 2013
B-2	510665	50.0458	12.9801	14.3963	10.3719	8.4055	0.53999	2.07845	0.213958	0.886398	0.0815079	1.4	100	57.6396	355.88	42	5318.39	319		57.9	53.4	13.6	93.4	137	59.4	2	1.7		5.1	10.3	1.54	7.2	2.23	0.84	3.13	0.61	3.89	0.86	2.72	0.4	2.7	0.43	23.3	0.9	0.321178	North Atlantic Craton	[17073] Szilas et al., 2013
B-2	510627	48.3773	18.8426	7.40468	13.2129	10.2615	0.0105031	1.45993	0.126037	0.30459		4.4	100	76.3573		29	1827.54	126		32.1	114.5	0.3	148.2	4	13	0.3	0.6		1.1	2.5	0.4	2.3	0.7	0.33	0.98	0.18	1.06	0.23	0.7	0.1	0.65	0.1	6.3		0.525564	North Atlantic Craton	[17073] Szilas et al., 2013
B-2	510631	47.159	18.2097	11.0782	11.0041	10.729	0.0211618	0.973442	0.158713	0.613692	0.0529045	5.2	100	69.2973	230.991	22	3682.15	164		42.8	198.4	0.4	153.6	5	32.8	0.8	1.5		2.8	6.3	0.96	4.2	1.41	0.73	1.89	0.35	2.12	0.46	1.29	0.2	1.26	0.21	12.5		0.516179	North Atlantic Craton	[17073] Szilas et al., 2013
B-2	510990	49.8322	10.5937	11.5586	11.0761	16.0688	0.0314663	0.157332	0.178309	0.471995	0.0314663	4.3	100	76.4143	137.388	51	2831.97	195		76.3	139.8	0.4	64.4	5	18.2	0.6	0.8		1.3	3.3	0.56	2.9	0.96	0.39	1.43	0.28	1.75	0.35	1.13	0.16	0.94	0.15	10		0.592944	North Atlantic Craton	[17073] Szilas et al., 2013
B-2	510971	48.723	11.2088	13.2148	9.15107	14.6831	0.392927	1.56137	0.206804	0.806535	0.051701	2.7	100	72.1405	225.737	40	4839.21	297		66.2	201.7	11.8	29.4	48	32.9	0.9	0.9	0.1	2.3	5.5	0.85	4.2	1.44	0.48	1.98	0.41	2.43	0.55	1.58	0.25	1.54	0.24	14.6	0.2	0.377035	North Atlantic Craton	[17073] Szilas et al., 2013
B-2	510633	49.9219	16.4117	13.7787	7.31606	7.90925	0.145697	3.14289	0.176917	1.12395	0.0728484	3.6	100	57.2238	318.07	45	6743.68	325		48.1	76.7	2.5	108.6	29	53.9	1.5	2.3	0.1	3.2	8.2	1.33	7.1	2.16	0.82	3.08	0.57	3.67	0.81	2.51	0.34	2.17	0.36	21.3		0.69254	North Atlantic Craton	[17073] Szilas et al., 2013
B-2	510878	50.1407	11.9045	11.9775	9.28802	14.2708	0.333577	1.35515	0.187637	0.489941	0.0521213	3.5	100	73.522	227.572	36	2939.64	197		66	150	6.7	78.9	99	31.9	1.2	0.8	0.1	2.7	6.2	0.9	4.1	1.3	0.41	1.68	0.33	1.98	0.43	1.28	0.21	1.24	0.21	12.6	0.3	0.285492	North Atlantic Craton	[17073] Szilas et al., 2013
B-2	879335	52.1967	8.36356	12.5453	8.19226	15.7799	0.100766	1.77348	0.221685	0.755744	0.0705361	1.5	100	74.5636	307.974		4534.46	155		71.9	44.1	2.1	155.2	20	62.5	1.9	3.5	0.3	9	18.4	2.35	9.1	2.11	0.72	2.98	0.4	2.36	0.51	1.4	0.22	1.49	0.19	13	1.8	0.374708	North Atlantic Craton	[17073] Szilas et al., 2013
B-2	512282	51.9673	15.3357	11.3162	9.99045	8.9405	0.074239	1.7181	0.169689	0.45604	0.0318167	5.4	100	64.8042	138.918	48	2736.24	236		42.1	60.6	1.8	97.5	13	23.1	0.8	0.7	0.1	1.2	3.1	0.5	2.7	0.83	0.33	1.33	0.29	1.91	0.44	1.38	0.22	1.46	0.22	13.1	0.2	0.562062	North Atlantic Craton	[17073] Szilas et al., 2013
B-2	510783	52.4203	14.7161	13.991	9.88562	5.59641	0.367647	2.14461	0.204248	0.622958	0.0510621	1.9	100	48.2455	222.947	41	3737.75	234		52.8	30.9	15	172.8	58	35	1.2	1		2.4	6	0.93	4.8	1.38	0.61	2.04	0.36	2.11	0.5	1.49	0.21	1.28	0.2	12.5	0.3	0.401473	North Atlantic Craton	[17073] Szilas et al., 2013
B-2	510840	51.8739	11.7158	11.9622	9.36441	12.4756	0.420988	1.36564	0.225896	0.544204	0.05134	2.1	100	70.8499	224.16	41	3265.22	211		61.6	54.6	10.2	67.1	92	36.3	1.2	1.2	0.1	3.4	7.7	1.07	5.2	1.42	0.47	1.81	0.35	2.21	0.46	1.36	0.21	1.33	0.21	12.5	0.5	0.340071	North Atlantic Craton	[17073] Szilas et al., 2013
B-2	510872	53.4679	15.0828	11.6149	7.85714	8.02277	0.362319	2.70186	0.175983	0.652174	0.0621118	3.1	100	61.6821	271.192	43	3913.04	248		45	56.5	8	87.7	63	46.2	1.3	1.4	0.1	4.1	9.5	1.35	6.1	1.74	0.54	2.3	0.44	2.68	0.58	1.78	0.28	1.71	0.26	16.5	0.8	0.329012	North Atlantic Craton	[17073] Szilas et al., 2013
B-2	511116	47.3625	17.0367	11.0896	10.7536	10.3564	0.631365	1.92464	0.183299	0.600815	0.0610998	1.5	100	68.518	266.774	30	3604.89	198		60	75	38.5	109.3	96	34.4	1.2	1.4	0.1	2.8	6.7	0.97	5	1.46	0.55	2.01	0.38	2.42	0.52	1.57	0.24	1.47	0.22	14.1		0.481767	North Atlantic Craton	[17073] Szilas et al., 2013
B-2	510662	48.8568	9.85582	11.3182	11.7817	15.9217	0.432544	1.14315	0.185376	0.473738	0.030896	2.2	100	76.6267	134.898	34	2842.43	196		77.3	90.1	13.1	76.5	150	26.3	0.8	1.1		1.6	4.4	0.73	3.5	1.09	0.43	1.59	0.29	1.87	0.42	1.26	0.18	1.27	0.19	11.1		0.66243	North Atlantic Craton	[17073] Szilas et al., 2013
B-2	879324	52.0325	8.85163	12.8354	6.91057	16.8496	0.162602	1.25	0.223577	0.813008	0.0711382	1.9	100	75.3656	310.603		4878.05			69.4	93.6	5.4	47.3	15	68.9	2.1	3.7	0.2	9.1	18.2	2.18	9.8	2.31	0.59	3	0.39	2.5	0.47	1.4	0.2	1.33	0.18	12.8	2	0.391767	North Atlantic Craton	[17073] Szilas et al., 2013
B-2	510671	50.6053	15.2613	14.4025	9.02225	7.75996	0.103466	1.51061	0.206932	1.05535	0.0724263	3.1	100	55.667	316.227	46	6332.13	303		51.5	70.8	0.8	99.5	9	50.4	1.7	2.2	0.2	3	8.1	1.3	6.5	2.16	0.77	3.07	0.59	3.45	0.78	2.48	0.37	2.25	0.36	21.9	0.3	0.706592	North Atlantic Craton	[17073] Szilas et al., 2013
B-2	510870	47.7797	18.6699	8.02733	13.9944	9.56447	0.192143	1.32365	0.128096	0.288215	0.0320239	5.9	100	73.5223	139.823	27	1729.29	117		49.3	137.6	4.9	108.9	21	10.4	0.4	0.4	0.1	0.9	2.4	0.38	1.9	0.65	0.25	0.83	0.15	0.98	0.19	0.57	0.08	0.52	0.08	4.7	0.2	0.428237	North Atlantic Craton	[17073] Szilas et al., 2013
B-2	510663	49.7369	9.5243	10.938	11.3404	15.9942	0.567537	1.21762	0.206377	0.443711	0.0309566	2.4	100	77.313	135.162	33	2662.26	173		66.5	95.7	16.4	59.7	97	21.6	0.7	1.3	0.1	3.7	8.1	1.05	4.2	1.19	0.44	1.46	0.28	1.82	0.41	1.12	0.19	1.15	0.18	10.9	0.5	0.338539	North Atlantic Craton	[17073] Szilas et al., 2013
B-2	516522	50	13.9856	14.8404	8.66117	8.17714	0.298661	2.46138	0.216272	1.27703	0.0823893	2.6	100	56.2195	359.728	49	7662.2	336		37.1	41	8	56.1	32	61.8	2	2.5	0.1	3.9	10.3	1.61	9.2	2.66	0.87	3.53	0.67	4.28	0.93	2.7	0.4	2.53	0.4	24.2	0.2	0.61765	North Atlantic Craton	[17073] Szilas et al., 2013
B-2	510751	49.0204	14.9144	12.7295	13.5911	5.81598	0.112832	2.54385	0.205149	0.994974	0.0718022	2.3	100	51.5687	313.503	45	5969.84	290		47.5	64.3	7.7	75.5	26	51	1.8	2	0.2	3	8.4	1.37	6.8	2.18	0.8	3.05	0.57	3.76	0.8	2.44	0.33	2.34	0.36	21	0.3	0.642356	North Atlantic Craton	[17073] Szilas et al., 2013
B-2	510841	53.1144	14.1769	10.069	9.06002	9.64687	0.494183	2.47092	0.154432	0.741275	0.0720684	2.5	100	69.0671	314.665	31	4447.65			46.9	70.8	13.6	161.4	116	61.9	2	2.1	0.2	4.2	10.5	1.52	7.6	2.03	0.69	2.51	0.44	2.57	0.54	1.62	0.23	1.42	0.23	14.6	0.6	0.481767	North Atlantic Craton	[17073] Szilas et al., 2013
B-2	510970	47.8198	11.1888	13.5952	9.45084	15.3126	0.647882	1.00782	0.205677	0.730152	0.0411353	2.2	100	72.413	179.605	38	4380.91	253		78	159.5	20.7	38.5	67	36.6	1.2	1.6		2.6	7.1	1.12	5.9	1.87	0.62	2.58	0.47	2.97	0.65	1.95	0.28	1.83	0.27	17.6	0.3	0.592944	North Atlantic Craton	[17073] Szilas et al., 2013
B-2	510636	51.4895	14.3144	14.6947	8.51468	7.07796	0.17959	2.15508	0.211282	1.27826	0.084513	5.1	100	52.8863	369	46	7669.55	353		37.7	62.4	4.8	103.5	12	64.7	2.2	2.6	0.1	3.7	10.3	1.65	9	2.73	0.8	3.7	0.7	4.55	0.99	2.82	0.41	2.59	0.39	23.9	0.5	0.677078	North Atlantic Craton	[17073] Szilas et al., 2013
B-2	510868	52.3208	16.5141	13.0513	9.62004	5.90464	0.421008	1.0841	0.178929	0.820966	0.0842017	4.8	100	51.3231	367.641	45	4925.8	290		43.4	52.2	14.8	172.8	39	56.9	1.7	1.5	0.1	4.3	10.6	1.5	7.1	2.18	0.72	2.91	0.56	3.45	0.72	2.25	0.36	2.22	0.34	21.1	0.4	0.336117	North Atlantic Craton	[17073] Szilas et al., 2013
B-2	510789	52.2723	14.222	13.9278	7.73991	6.50233	0.639075	3.70258	0.223169	0.710083	0.0608643	1.2	100	52.1077	265.745	45	4260.5	301		61.5	27.2	29.6	87.1	78	36.7	1.1	1.3		2.1	5.9	0.93	4.5	1.5	0.56	1.91	0.39	2.3	0.51	1.45	0.22	1.4	0.2	12.9	0.2	0.596474	North Atlantic Craton	[17073] Szilas et al., 2013
B-2	510835	53.0303	13.3787	8.3591	12.987	7.58606	0.463822	3.23645	0.185529	0.690579	0.0824572	2.7	100	67.8971	360.025	30	4143.48	188		34.5	19.1	11.6	186.1	90	63.8	1.8	2.4	0.1	4.5	11.3	1.59	7.2	2.08	0.68	2.48	0.43	2.47	0.52	1.5	0.22	1.41	0.22	14	0.6	0.513885	North Atlantic Craton	[17073] Szilas et al., 2013
B-2	510744	50.0707	16.0097	11.6232	11.2593	6.98403	0.121286	2.6885	0.192036	0.980392	0.0707499	0.8	100	58.339	308.908	43	5882.35	273		42.5	26	5	103.5	13	48.9	1.6	1.9	0.1	2.7	7.9	1.29	6.5	2.14	0.83	3.08	0.57	3.45	0.78	2.27	0.33	2.06	0.34	20.5	0.4	0.678043	North Atlantic Craton	[17073] Szilas et al., 2013
B-2	510673	51.6903	14.4526	13.9254	10.0072	5.66525	0.103381	2.62587	0.217099	1.23023	0.0827044	3.1	100	48.6684	361.104	52	7381.37	321		38.2	22.4	2	99.7	21	56.6	1.8	2.4	0.1	3.5	9.7	1.5	7.2	2.54	0.89	3.48	0.66	3.83	0.89	2.74	0.41	2.59	0.39	24.4	0.4	0.660709	North Atlantic Craton	[17073] Szilas et al., 2013
B-2	510906	47.1531	16.6491	12.4526	9.34205	12.0413	0.0421763	1.44454	0.168705	0.653733	0.0527204	4.7	100	69.2642	230.188	25	3922.4	176		53.2	201.2	0.6	139.4	8	36.1	1	1.5	0.1	2	5.6	0.87	5.1	1.55	0.6	1.99	0.39	2.31	0.49	1.43	0.23	1.31	0.19	13	0.2	0.722651	North Atlantic Craton	[17073] Szilas et al., 2013
B-2	510860	48.216	16.3562	13.0092	10.5357	8.54647	0.189454	2.08399	0.189454	0.789391	0.0842017	4.7	100	60.4906	367.641	51	4736.34	298		47.9	80.9	8.8	185.8	17	54.5	1.8	1.7	0.1	4	10.1	1.41	6.7	2.03	0.69	2.85	0.52	3.27	0.73	2.19	0.34	2.05	0.32	19.7	0.6	0.409502	North Atlantic Craton	[17073] Szilas et al., 2013
B-2	512252	50.7871	14.734	12.7482	9.20877	7.07892	2.72662	1.58453	0.246939	0.781973	0.102891	2.4	100	56.4098	449.243	29	4691.84	169		45.5	85.7	74.8	155.6	692	65.1	2	2.2	0.2	5.5	13.2	1.75	7.7	2.26	0.72	2.69	0.46	2.75	0.59	1.82	0.26	1.63	0.26	15.6	0.6	0.385414	North Atlantic Craton	[17073] Szilas et al., 2013
B-2	510874	50.7588	16.0395	13.0873	9.12682	7.921	0.467775	1.69439	0.18711	0.654886	0.0623701	3.5	100	58.5151	272.32	43	3929.31	253		48.8	62.3	12.3	127	85	47.3	1.4	1.3	0.1	3.5	9	1.27	5.6	1.67	0.45	2.22	0.43	2.53	0.55	1.72	0.26	1.6	0.27	15.2	0.4	0.357884	North Atlantic Craton	[17073] Szilas et al., 2013
B-2	508217	50.1919	16.3131	11.8182	10.5758	6.19192	0.929293	2.91919	0.181818	0.828283	0.0505051	0.8	100	54.9757	220.515	37	4969.7	226		47	32.6	8.6	149.4	48	49.3	1.7	2.7	0.3	7.1	15.4	1.82	7.3	2.06	0.72	2.61	0.51	3.08	0.68	1.92	0.29	2.09	0.32	19.6	3.3	0.366414	North Atlantic Craton	[17073] Szilas et al., 2013
B-2	512268	49.2607	14.6727	11.7258	9.8025	10.8262	0.206804	2.51267	0.175783	0.796195	0.0206804	2.9	100	68.2711	90.2946	28	4777.17			50.5	122	4.6	107.9	24	41.2	1.4	2	0.2	2.8	8.6	1.43	8	2.34	0.86	3.01	0.53	3.21	0.68	1.9	0.28	1.73	0.25	18.2	0.2	0.688239	North Atlantic Craton	[17073] Szilas et al., 2013
B-2	510740	50.5261	14.5367	14.5572	10.7876	6.46644	0.0817244	1.55276	0.204311	1.19522	0.0919399	1.9	100	50.8656	401.428	46	7171.31	329		54.8	58.5	0.7	127.7	8	67.8	2.1	2.9	0.2	3.8	10.7	1.63	8.7	2.76	0.92	3.88	0.71	4.43	0.96	2.95	0.42	2.78	0.43	26.8		0.735329	North Atlantic Craton	[17073] Szilas et al., 2013
B-2	508219	46.5281	16.0678	15.6843	11.2434	6.25757	0.555107	2.15987	0.232136	1.19096	0.0807428	0.7	100	48.1812	352.539	47	7145.74	332		50.3	19.3	9.4	110.4	82	68.3	2	2.8	0.2	3.9	11.5	1.8	9.1	2.92	0.99	4.02	0.77	4.89	1.07	3.14	0.45	2.94	0.44	29.2	0.2	0.691768	North Atlantic Craton	[17073] Szilas et al., 2013
B-2	510892	53.5186	17.8014	10.7745	5.66313	5.72559	1.32209	3.8934	0.176973	1.0202	0.104102	3.7	100	55.3258	454.528	33	6121.17	217		34	48.7	55.6	223.5	125	83.2	3	2.8	0.2	5.1	13.8	1.98	9.5	2.89	0.9	3.45	0.63	3.65	0.8	2.37	0.35	2.2	0.33	21.5	0.4	0.528999	North Atlantic Craton	[17073] Szilas et al., 2013
B-2	510619	52.8143	14.4976	11.9621	8.99527	8.37454	0.315623	2.09363	0.168332	0.715413	0.0631247	4.7	100	61.9997	275.615	46	4292.48	270		45.1	74.9	10.3	98.1	30	52.9	1.7	1.7		3.8	9.8	1.34	6.5	1.82	0.64	2.54	0.47	3.03	0.69	1.91	0.3	2.03	0.31	18.7	0.7	0.431055	North Atlantic Craton	[17073] Szilas et al., 2013
B-2	511120	52.0222	13.6299	14.4793	9.14055	6.67341	0.343782	2.3458	0.212336	1.07179	0.0808898	0.8	100	51.7866	353.181	46	6430.74	345		55	17.4	17.8	108.3	68	66.1	2.1	2.4	0.2	4	11.2	1.66	8.5	2.56	0.92	3.59	0.68	4.23	0.91	2.78	0.42	2.62	0.39	25.8	0.4	0.578121	North Atlantic Craton	[17073] Szilas et al., 2013
B-2	510961	50.4681	15.0094	14.4373	9.64219	7.55149	0.041606	1.31059	0.20803	1.23778	0.0936135	3.6	100	54.9342	408.735	47	7426.67	333		38.9	73.3	0.3	131.6	5	62.6	2	2.6	0.2	3.4	9.9	1.52	7.8	2.68	0.93	3.66	0.69	4.18	0.91	2.73	0.41	2.72	0.43	24.7	0.4	0.73682	North Atlantic Craton	[17073] Szilas et al., 2013
B-2	510862	53.0412	15.0339	12.0918	8.50287	7.57433	0.0730308	2.64997	0.156495	0.803339	0.0730308	3.9	100	59.3468	318.867	48	4820.03	281		44.8	63.8	2.2	168.8	10	56.6	1.8	1.6	0.1	3.7	10	1.36	6.7	2.06	0.7	2.86	0.54	3.31	0.75	2.28	0.36	2.21	0.33	20.7	0.4	0.416664	North Atlantic Craton	[17073] Szilas et al., 2013
B-2	512251	52.7088	17.1147	11.3277	8.2085	5.30474	1.77509	2.38046	0.194952	0.861892	0.123127	2.2	100	52.1844	537.599	23	5171.35	156		32.8	41.7	51.2	267.9	532	81.4	2.2	3.1	0.2	6.2	16.6		10	2.8	0.95	3.39	0.58	3.39	0.72	2.11	0.33	1.95	0.3	19	0.9	0.481767	North Atlantic Craton	[17073] Szilas et al., 2013
B-2	SM/GR/98/35	47.0457	12.8789	18.9603	11.6275	5.15914	1.48771	1.54268	0.281172	0.939606	0.0772378	5.7	100	38.8055	337.235	31.68	5637.64	200.9	123.7	59.64	76.2	56.97	67.16	66.18	53.39		2.259	0.159	4.472	11.05	1.892	9.424	2.785	1.004	3.533	0.614	3.801	0.785	2.125		2.008	0.319	21.7	0.392	0.486723	North Atlantic Craton	[20709] Dale et al., 2017
B-2	SM/GR/00/22	48.0493	15.5029	13.8066	11.548	7.34766	0.256269	2.19553	0.205327	1.01554	0.0729674	0.4	100	55.3623	318.59	47.98	6093.26	245.7	264.25	58.97	75.34	4.982	59.14	21.75	12.94		1.603	0.108	2.119	5.767	1.08	5.741	1.948	0.596	2.892	0.539	3.58	0.794	2.161		2.23	0.36	22.01	0.133	0.728903	North Atlantic Craton	[20709] Dale et al., 2017
B-2	SM/GR/98/23	51.5895	11.5875	18.363	7.83625	6.97003	1.21798	1.32461	0.215825	0.848106	0.0471808	0.62	100	46.938	206.001	36.14	5088.63	222.7	295.35	64.61	120.8	42.99	14.09	79.57	45.14		2.226	0.164	3.182	8.543	1.509	7.786	2.548	0.937	3.178	0.544	3.315	0.669	1.739		1.631	0.245	17.91	0.491	0.67405	North Atlantic Craton	[20709] Dale et al., 2017
B-2	SM/GR/98/21	48.5753	16.5293	13.2569	5.6571	13.8791	0.0717999	1.52806	0.192539	0.279548	0.0302628	4.32	100	70.9292	132.133	41.95	1677.29	186.1	592.85	71.5	263.9	0.519	32.95	4.803	10.31		0.462	0.068	0.75	2.07	0.343	1.696	0.559	0.131	0.913	0.192	1.454	0.363	1.126		1.331	0.219	11	0.266	0.593537	North Atlantic Craton	[20709] Dale et al., 2017
B-2	514302	48.6458	7.45689	14.8931	12.3142	14.6031	0.144995	0.963182	0.227849	0.700119	0.0507483		100	69.5597	221.577	37.286	4200.71	173	1764.87	82.977	531.798	7.288	39.0285	31	24.625	0.431	1.1215		2.2	4.8	0.63	2.5	3	0.41	1.5	0.31	1.9	0.4	1.3	0.2	1.3	0.19	11	0.218	0.491184	North Atlantic Craton	[20907] Tappe et al., 2017
B-2	514324	48.6276	7.45499	14.8997	12.3013	14.6213	0.144357	0.969252	0.225815	0.706317	0.0494937		100	69.5767	216.099	31.578	4237.9	184	1999.66	114.743	1015.29	3.545	68.533	36	22.7625	0.8285	2.229		3.5	8.6	1.2	6.3	1.8	0.64	2.2	0.42	2.2	0.42	1.3	0.17	1.2	0.17	10	0.4445	0.613634	North Atlantic Craton	[20907] Tappe et al., 2017
ADK	519692	49.647	4.52007	16.0152	9.20872	18.5544	0.537351	0.431988	0.326625	0.727005	0.0316089	3.58119	100	72.973	138.011	34.4367	4362.03	181.797	1639.8	86.7667	650.027	31.0933	68.9467	115.55	36.55	1.00667	2.04	0.135333	2.62	7.57667	1.15	6.16333	1.76667	0.518	2.05	0.327	2.05	0.419333	1.11667	0.159	0.983333	0.131667	10.2067	0.279333	0.750233	North Atlantic Craton	[21512] Klausen et al,. 2017
AUK	519682	51.7535	5.64889	12.1798	5.28139	24.4645	0.0209996	0.251995	0.188996	0.199496	0.0104998	3.85683	100	82.3977	45.8442	21.94	1196.98	109.595	2189.19	104.892	708.508	0.219917	4.62	4.41167	12.35	0.345833	0.380167	0.0315167	0.857333	2.095	0.2695	1.34333	0.481667	0.241333	0.763333	0.161167	1.08383	0.257167	0.741333	0.124333	0.838667	0.119333	6.01333	0.105333	0.427259	North Atlantic Craton	[21512] Klausen et al,. 2017
B-1	519695	52.9375	12.2164	11.8122	9.78137	9.2322	0.590612	2.11377	0.248679	0.973992	0.0932546	1.54588	100	64.5575	407.168	44.1067	5843.95	266.2	744.02	26.67	45.1767	31.4667	160.387	115.247	69.9633	1.98333	4.53	0.272	2.47667	5.88333	0.921	5.18667	2.19	0.779333	2.99667	0.529333	3.75	0.797333	2.35	0.335667	2.16333	0.339667	20.7933	0.539667	1.76237	North Atlantic Craton	[21512] Klausen et al,. 2017
B-1	519681	49.6203	15.0733	9.35192	14.1267	10.2257	0.124831	0.821804	0.239259	0.405701	0.0104026	1.72243	100	71.8171	45.4197	78.48	2434.2	304.44	432.54	55.73	86.8133	6.95667	150.837	48.5833	32.3033	1.04	1.27	0.0726667	1.49667	3.74	0.576333	3.49333	1.39667	0.405667	1.93333	0.381	2.87	0.571667	1.81667	0.272667	1.86333	0.272333	15.5067	0.204667	0.817609	North Atlantic Craton	[21512] Klausen et al,. 2017
B-1	519697	49.1606	13.9171	16.3212	9.67876	6.74611	0.466321	2.07254	0.290155	1.25389	0.0932642	0.947064	100	49.0647	407.21	45.0767	7523.32	312.75	135.647	47.73	85.1433	13.8133	101.453	63.42	76.05	2.19333	3.32333	0.225667	3.99667	10.5533	1.66	8.99	2.99	0.986	3.80333	0.66	4.81	1.01967	3.04333	0.446	2.89	0.415333	26.5433	0.418333	0.801204	North Atlantic Craton	[21512] Klausen et al,. 2017
B-1	519685	46.7997	5.54726	17.9753	13.8575	13.6655	0.394709	0.576061	0.34137	0.800085	0.0426712	3.82737	100	63.9215	186.311	41.88	4800.51		1713.76	98.6967	661.307	14.3933	102.6	234.47	51.89	1.47767	2.75	0.1695	3.48	9.73167	1.61917	9.02667	2.81333	1.09817	3.05	0.478833	2.94167	0.556833	1.52633	0.208167	1.27167	0.175167	13.1983	0.418	0.761414	North Atlantic Craton	[21512] Klausen et al,. 2017
B-1	519637	49.6495	16.1523	15.4828	9.21645	6.48603	0.993828	0.54399	0.240611	1.16121	0.0732294	2.1323	100	49.4001	319.734	48.6233	6967.26	302.783	137.533	76.3433	142.62	27.43	124.643	129.607	65.7067	1.88667	2.46667	0.160667	3.09333	8.31667	1.295	6.71	2.37	0.768	3.26667	0.587333	4.21	0.93	2.74333	0.428	2.87667	0.408	24.5333	0.639667	0.768336	North Atlantic Craton	[21512] Klausen et al,. 2017
B-1	519688	49.428	5.33486	16.6805	12.2504	14.3511	0.114393	0.613561	0.31198	0.873544	0.0415973	2.00565	100	66.7226	181.622	39.22	5241.26	213.393	1288.37	88.0733	433.64	1.00333	90.3633	24.5033	43.82	1.25	2.31333	0.135	2.54667	7.67667	1.23667	6.90333	2.04	0.755333	2.08	0.351667	2.43	0.465667	1.26667	0.17	1.03333	0.153667	10.8467	0.522667	0.875252	North Atlantic Craton	[21512] Klausen et al,. 2017
B-1	519647	47.7128	16.3487	15.0872	9.6	7.04615	0.112821	2.4	0.317949	1.27179	0.102564	0.68266	100	52.1167	447.815	45.26	7630.77	298.537	172.11	53.9967	129.96	0.773667	165.803	26.5233	83.0133	2.35667	2.85333	0.199667	3.17	9.79		8.19333	3.35333	1.09567	4.29667	0.729333	5.74667	1.22333	3.75	0.558333	3.69	0.56	32.2333	0.457333	0.867282	North Atlantic Craton	[21512] Klausen et al,. 2017
B-2	519638	50.8422	13.3822	18.3528	6.95463	5.94192	0.0826702	2.2941	0.279012	1.75674	0.113672	1.01494	100	43.0045	496.313	56.7467	10540.5	423.543	19.9367	48.4833	27.3467	0.993	195.543	23.99	119.85	3.38	4.20667	0.252333	6.05667	14.8433	2.41667	13.0267	4.52667	1.40333	6.16	1.05333	7.78333	1.67	4.94	0.745667	4.8	0.737	42.9233	0.652667	0.669224	North Atlantic Craton	[21512] Klausen et al,. 2017
B-2	519639	51.0783	14.1781	14.9314	8.49242	7.21288	0.113507	2.45589	0.288928	1.17635	0.072232	1.28726	100	52.9587	315.379	53.4	7058.1	330.713	217.487	51.13	80.1533	2.42667	235.977	53.7	75.11	2.20333	2.73333	0.174333	3.75333	9.54667	1.57333	8.41667	2.94	1.02467	3.88333	0.721	5.16667	1.15067	3.21333	0.471333	3.15667	0.491667	29.07	0.460333	0.701686	North Atlantic Craton	[21512] Klausen et al,. 2017
B-2	519654	50.4471	16.1988	11.5305	8.86879	8.4425	0.415887	2.99439	0.259929	0.800582	0.0415887	1.63951	100	63.0502	181.584	50.4233	4803.49	253.77	591.65	39.5167	92.9	13.49	138.123	140.407	37.3	1.02667	1.39667	0.0643333	1.99333	5.02333	0.807667	4.23667	1.46333	0.556667	2.08667	0.386	2.74	0.603333	1.85667	0.248	1.59667	0.249667	15.87	0.202	0.675119	North Atlantic Craton	[21512] Klausen et al,. 2017
B-2	519690	50.7242	7.33499	18.4358	9.41444	10.5111	0.506932	1.62425	0.289675	1.08628	0.0724188	1.18378	100	57.058	316.195	37.1667	6517.69	252.113	209.28	76.12	189.53	33.0267	96.1667	245.147	64.4233	1.8	3.13333	0.195	4.69333	12.0767	1.97	10.73	3.22333	0.998	3.51	0.583333	3.66667	0.677667	1.89333	0.267667	1.56667	0.226	16.97	0.468	0.643269	North Atlantic Craton	[21512] Klausen et al,. 2017
B-2	519662	51.7344	13.6802	16.6154	7.52258	5.37767	0.277094	2.63752	0.266831	1.69335	0.194992	0.938179	100	42.9966	851.373	44.02	10160.1	299.203	67.28	45.97	73.0833	3.40333	117.61	82.9467	121.293	3.33333	5.14667	0.341333	9.71333	21.9767	3.15	16.5033	5.09	1.59333	6.23333	0.990333	7.44667	1.59	4.73	0.688667	4.56667	0.695	41.0167	1.18667	0.510534	North Atlantic Craton	[21512] Klausen et al,. 2017
B-2	519648	45.4583	16.8869	16.0921	8.82535	8.22667	0.144509	2.60116	0.319983	1.35219	0.0928984	1.24586	100	54.3673	405.613	46.6767	8113.13	338.34	225.557	56.71	160.007	1.81667	165.16	40.1267	82.6533	2.27667	2.87333	0.186667	3.98	10.0367	1.602	8.88667	3.05333	1.03767	4.22	0.734667	5.62333	1.24133	3.62333	0.561333	3.54333	0.519333	32.41	0.514667	0.695617	North Atlantic Craton	[21512] Klausen et al,. 2017
B-2	519675	51.6549	14.5313	12.0756	12.2678	5.66944	0.192184	2.13538	0.256246	1.13175	0.0854153	4.30405	100	52.2482	372.94	43.42	6790.52	286.987	141.327	38.0633	68.31	4.09667	197.247	45.3833	79.7333	2.18333	3.97	0.262667	5.88333	13.9133	2.05333	11.39	3.48667	1.16	3.90667	0.683667	4.24	0.876667	2.46667	0.341667	2.33333	0.356	22.1333	0.677333	0.650181	North Atlantic Craton	[21512] Klausen et al,. 2017
B-2	519674	52.3482	14.642	11.9495	11.5216	6.34523	0.0626174	1.86809	0.25047	0.939261	0.0730536	2.29795	100	55.3074	318.967	46.9867	5635.57	279.028	148.168	40.4183	75.605	1.12583	153.1	18.985	60.49	1.74333	3.01167	0.1985	4.51833	11	1.64683	8.44667	2.57167	0.825667	3.10167	0.525833	3.585	0.701	2.04	0.313333	1.965	0.2935	18.135	0.532	0.642238	North Atlantic Craton	[21512] Klausen et al,. 2017
B-2	519684	49.7933	4.73434	18.7616	7.99049	17.2007	0.0413479	0.423816	0.299773	0.713252	0.0413479	1.27496	100	68.1185	180.533	36.0033	4279.51	204.433	1921.25	100.767	752.373	0.656667	14.98	8.07	39.5967	1.15667	2.46667	0.125667	3.83333	9.63	1.47667	7.31333	2.08667	0.61	2.27667	0.342	2.21667	0.431333	1.14333	0.157333	0.906667	0.13	10.2067	0.326667	0.620013	North Atlantic Craton	[21512] Klausen et al,. 2017
B-2	519655	48.473	15.7037	13.9806	9.28601	8.21296	0.350805	2.69294	0.27858	0.959554	0.0619067	1.0259	100	57.7892	270.297	43.6133	5757.33	262.143	233.227	53.8833	143.48	7.16333	163.693	114.363	51.5333	1.55	1.98	0.131	2.72	7.12333	1.138	6.12667	2.19333	0.768667	2.95333	0.489333	3.78333	0.795333	2.33667	0.352333	2.27333	0.344667	20.7267	0.277333	0.701396	North Atlantic Craton	[21512] Klausen et al,. 2017
B-2	519642	51.0098	14.3868	14.5222	10.1915	6.68332	0.239434	1.51988	0.229024	1.13471	0.0832813	1.69425	100	51.7498	363.623	50.44	6808.24	313.56	227.41	48.56	88.9633	6.98333	273.157	77.2333	69.7967	1.92333	2.54	0.169	3.64667	9.22	1.40667	8.21333	2.76667	0.89	3.77	0.659	4.78667	1.01667	2.97667	0.457	3.01667	0.449333	26.43	0.405	0.671127	North Atlantic Craton	[21512] Klausen et al,. 2017
B-2	519670	51.0343	15.3364	11.6799	12.2023	7.03092	0.114919	1.69244	0.261178	0.616381	0.0313414	2.41671	100	58.3834	136.843	65.4517	3698.29	327.915	399.6	52.6383	138.377	1.66	78.1883	46.785	43.4033	1.24833	1.65667	0.106833	2.61833	6.28333	0.9085	4.835	1.78667	0.566333	2.425	0.433833	3.32833	0.708	2.07167	0.329833	2.21	0.354	18.2783	0.3315	0.609646	North Atlantic Craton	[21512] Klausen et al,. 2017
B-2	519645	50.7609	14.1733	14.6495	10.1046	6.20147	0.0931773	2.33979	0.320944	1.27342	0.0828243	1.50774	100	49.6615	361.627	49.58	7640.54	344.467	191.577	40.1933	65.86	1.38333	74.87	21.3867	64.0367	1.69333	2.27667	0.146667	3.10333	8.08	1.25667	6.75333	2.44	0.776667	3.04333	0.547333	4.00333	0.86	2.66333	0.377333	2.60667	0.375333	24.35	0.316667	0.706868	North Atlantic Craton	[21512] Klausen et al,. 2017
B-2	519663	48.0503	15.0505	16.8661	7.57169	7.68517	0.226945	2.83681	0.288838	1.27914	0.144419	1.46499	100	51.5013	630.563	33.3067	7674.85	244.33	116.143	64.2333	190.24	3.92667	126.743	60.01	90.99	2.69	3.87667	0.278333	6.85	16.8633	2.44667	12.7567	3.68333	1.17667	4.52333	0.787333	5.72333	1.17333	3.57333	0.506	3.54333	0.542333	29.9967	0.886667	0.545299	North Atlantic Craton	[21512] Klausen et al,. 2017
B-2	519671	52.0892	15.1297	11.6391	11.4932	7.36689	0.395957	0.937793	0.250078	0.656455	0.0416797	1.89149	100	59.5973	181.982	59.5467	3938.73	293.667	284.123	41.775	87.5817	10.1817	105.635	108.697	38.2783	1.10317	1.57	0.0878333	2.26167	5.645	0.829167	4.48333	1.48167	0.551333	2.16167	0.377833	2.74667	0.625333	1.82667	0.267167	1.92167	0.305833	16.625	0.391167	0.668865	North Atlantic Craton	[21512] Klausen et al,. 2017
B-2	519658	53.5574	14.4991	13.9909	7.38436	6.25389	1.37938	1.15121	0.23854	1.38975	0.155569	1.61163	100	51.0219	679.247	44.8367	8338.52	262.79	124.893	43.7	67.1133	34.8967	74.1533	619.877	118.97	3.46	4.77	0.34	10.4067	24.6567	3.43667	17.2267	4.73	1.57667	6.01333	1.00567	6.71667	1.48	4.42667	0.626333	4.26	0.628	37.1333	1.82	0.441646	North Atlantic Craton	[21512] Klausen et al,. 2017
B-2	519656	53.6969	15.2598	13.2573	7.8969	5.15506	0.246457	2.64941	0.266995	1.41713	0.154036	0.87392	100	47.5397	672.55	45.08	8502.77	310.8	129.117	42.0167	66.5233	6.62	145.59	67.0633	115.867	3.26	4.79	0.303333	9.41667	22.5367	3.16	15.7867	4.71	1.50667	5.72667	0.910667	6.34667	1.43667	4.15	0.612333	4.07333	0.579	36.4567	1.59333	0.490123	North Atlantic Craton	[21512] Klausen et al,. 2017
B-2	519644	48.3232	14.5148	16.0658	11.5175	6.00503	1.22616	0.649759	0.324879	1.27856	0.0943198	2.8058	100	46.5551	411.819	52.8	7671.35	340.263	210.64	52.3133	79.91	28.9667	37.04	409.953	77.19	2.25333	2.77	0.164667	3.98667	10.2	1.51333	8.70333	3.15667	1.75667	4.15667	0.703333	5.66	1.196	3.50667	0.540667	3.63667	0.521333	30.97	0.517	0.669479	North Atlantic Craton	[21512] Klausen et al,. 2017
B-2	519689	52.3322	4.16266	14.2918	13.1924	13.6194	0.683104	0.629736	0.298858	0.757818	0.0320205	4.074	100	68.9523	139.808	58.52	4546.91		1022.95	77.5133	312.04	34.9833	121.653	193.36	38.4733	1.31667	1.82	0.115667	2.77667	7.98667	1.32667	7.48333	2.52333	0.79	2.54667	0.446	2.81333	0.512	1.44	0.161	1.19333	0.164333	12.16	0.241333	0.63156	North Atlantic Craton	[21512] Klausen et al,. 2017
B-2	519646	51.2733	14.2133	15.0104	9.7412	5.67288	0.10352	2.36025	0.300207	1.23188	0.0931677	1.59378	100	46.8302	406.789	51.97	7391.3	343.353	198.01	48.1233	71.9867	1.59333	209.05	23.1667	73.8167	2.04333	2.67333	0.175	3.62	9.75667	1.50667	7.86333	2.78	0.936667	3.75333	0.675667	4.84667	1.04	3.2	0.455333	3.16667	0.469333	27.31	1.17333	0.71156	North Atlantic Craton	[21512] Klausen et al,. 2017
B-2	519686	50.0946	5.30685	16.9189	12.3897	13.2934	0.283733	0.546448	0.30475	0.819672	0.0420345	2.7396	100	64.6781	183.531	47.1067	4918.03	287.798	2162.33	117.833	812.832	10.4483	94.3217	109.922	55.4683	1.5435	2.72333	0.161667	4.77833	12.6283	1.90917	9.9	2.92667	0.915833	2.805	0.445	2.64667	0.5115	1.33983	0.179	1.09917	0.158833	11.6417	0.540833	0.549151	North Atlantic Craton	[21512] Klausen et al,. 2017
B-2	519678	51.5792	15.0628	11.3024	10.2778	7.36242	0.306327	2.86258	0.21126	0.98236	0.052815	1.6229	100	60.2874	230.601	42.8333	5894.16	257.957	144.11	40.5133	116.537	9.88667	187.78	51.2	57.6733	1.65	2.95	0.161333	4.25333	10.8533	1.57533	8.01667	2.60667	0.809	2.84	0.455667	3.24	0.605667	1.73333	0.260667	1.75	0.243333	16.0967	0.502667	0.668282	North Atlantic Craton	[21512] Klausen et al,. 2017
B-2	519659	53.2597	14.497	13.518	8.6961	5.59258	1.32264	1.40596	0.260362	1.31223	0.135388	1.94626	100	49.0876	591.133	46.2333	7873.36	296.343	146.257	41.5067	65.0167	32.0333	74.8933	356.67	105.693	2.94333	4.43667	0.286333	8.75333	21.3167	2.94333	14.77	4.18	1.29667	5.06	0.87	6.47667	1.32333	4.11333	0.632	4.07667	0.633667	35.5333	1.14667	0.488372	North Atlantic Craton	[21512] Klausen et al,. 2017
B-2	519676	51.7741	15.4029	13.9857	8.61694	5.54464	0.113789	2.82404	0.268956	1.38616	0.0827558	0.700958	100	48.0229	361.328	49.4167	8316.95	376.548	103.713	48.5967	70.2183	1.555	197.113	18.5617	104.712	2.86667	5.57	0.3485	7.725	19.59	2.8025	14.805	4.47167	1.35067	5.20333	0.818833	5.55	1.09533	3.14	0.444333	2.85833	0.419167	28.31	0.860167	0.694743	North Atlantic Craton	[21512] Klausen et al,. 2017
B-2	519691	48.719	4.64548	15.8074	13.9577	15.1164	0.170086	0.478367	0.318911	0.744127	0.0425215	4.09167	100	69.0271	185.657	33.55	4464.76	186.407	1528.03	84.7133	643.7	5.32667	125.1	77.6367	38.2467	1.00333	2.00667	0.116333	2.62333	7.53333	1.21333	6.41667	2.14	0.69	2.18	0.344667	2.19333	0.409667	1.16	0.154333	0.953333	0.143333	10.73	0.319333	0.737036	North Atlantic Craton	[21512] Klausen et al,. 2017
B-2	519687	49.3731	4.88738	16.6915	13.7378	13.3553	0.223119	0.573736	0.339992	0.775606	0.0424989	3.93807	100	65.0923	185.559	37.9067	4653.63	226.69	1691.97	92.35	659.847	6.06333	106.047	70.3067	40.4667	1.16667	2.01667	0.133	2.71667	7.73667	1.23	6.51333	2.06333	0.715667	2.05333	0.340333	2.23667	0.413667	1.12	0.151	0.972667	0.144333	9.81	0.297667	0.715262	North Atlantic Craton	[21512] Klausen et al,. 2017
B-2	519683	49.9484	13.2872	12.9568	6.58683	13.0291	1.70349	1.82738	0.216808	0.412967	0.0309725	1.12304	100	70.0912	135.232	47.135	2477.8		1041.62	72.685	315.695	71.2467	78.12	462.087	30.9633	0.883833	1.29683	0.0683333	3	7.67167	0.996333	4.4	1.32333	0.773167	1.855	0.330667	2.59667	0.5715	1.68333	0.247167	1.75667	0.296667	14.575	0.1865	0.416514	North Atlantic Craton	[21512] Klausen et al,. 2017
B-2	519661	50.7484	14.9682	15.0195	7.58663	6.98175	0.164035	2.87062	0.266557	1.26102	0.133279	1.00891	100	51.9998	581.921	38.66	7566.13	261.627	165.327	49.54	124.947	3.00667	141.217	59.4433	101.32	2.76667	4.05667	0.271333	7.65667	20.0333	2.61333	13.43	4.03	1.34	4.88	0.786333	5.89333	1.26	3.61333	0.546667	3.67667	0.555667	31.4167	1.08667	0.510501	North Atlantic Craton	[21512] Klausen et al,. 2017
B-1	SB-19	47.9745	15.5106	13.1058	10.7311	7.5649	0.62924	3.45681	0.200395	0.7615	0.0651283	0.41	100	57.3598	284.363		4569	316.487	407.184	64.618	127.475	8.00984	165.802	95.3281	54.5607	1.0206	3.2742	0.164352	3.64977	9.03882	1.32985	6.69469	2.14561	0.796025	2.73627	0.500178	3.4591	0.749987	2.19592	0.325306	2.14281	0.320712	17.4185	0.337757	0.864385	North Atlantic Craton	[21581] Liu et al., 2016
B-1	SG-046	48.2875	17.6069	8.04749	14.393	9.50275	0.188468	1.45815	0.138871	0.367016	0.00991936	0.57	100	73.3471	43.3099	39	2202.1		840	41	170	1	90	17	11	0.5		0.68	1.66	4.35	0.65	3.03	1.09	0.366	1.53	0.29	1.91	0.41	1.21	0.183	1.17	0.182	10.6			North Atlantic Craton	[23015] Wasilewski et al., 2019
B-1	SG-109A	48.7059	16.5527	8.90587	13.5377	10.3442	0.198354	1.24963	0.148766	0.337202	0.0198354	1.1	100	73.0231	86.6053		2023.21	119	460	53	270	5	86	11	14	0.4	0.9	0.09	1.08	3.05	0.49	2.62	0.84	0.381	1.2	0.23	1.51	0.31	0.91	0.135	0.91	0.142	8.4		0.802945	North Atlantic Craton	[23015] Wasilewski et al., 2019
B-1	SG-051	46.6449	15.3772	13.5796	12.3867	8.58677	0.167788	2.10228	0.236877	0.908027	0.00986985		100	59.5739	43.0937	47.2	5448.16	326	362	51	113	2	105	22	40	1.3	2.3	0.15	1.96	6.26	1.1	5.87	2.24	0.809	3.19	0.63	4.27	0.93	2.6	0.386	2.51	0.369	24.7		1.13068	North Atlantic Craton	[23015] Wasilewski et al., 2019
B-1	SG-039	47.6463	15.7471	12.8675	12.2302	8.0316	0.118548	2.07458	0.1877	1.03729	0.0592738	0.11	100	59.261	258.801		6223.75	320	536	47	92	1	176	25	42	1.4	2.1	0.12	2.07	7.11	1.27	6.79	2.36	0.809	3.1	0.56	3.9	0.84	2.33	0.356	2.25	0.338	21.9		0.977499	North Atlantic Craton	[23015] Wasilewski et al., 2019
B-1	SG-029A	50.0271	14.0522	12.5661	11.5637	8.26544	0.0790006	2.43914	0.177751	0.780131	0.0493754		100	60.5196	215.583	52	4680.79	319	240	52	100		211	15	27	1.1	1.8	0.05	2.05	6.88	1.18	6.35	2.1	0.806	2.82	0.49	3.51	0.74	2.23	0.312	2.14	0.338	18.9		0.84603	North Atlantic Craton	[23015] Wasilewski et al., 2019
B-1	SG-282	50.3588	14.909	11.7709	11.5399	7.84478	0.0988008	2.39098	0.177841	0.859567	0.0494004		100	60.8331	215.692	53.6	5157.4	322	121	49	65	1	241	17	32	1.1	1.8	0.09	1.82	6.5	1.18	6.37	2.12	0.759	2.65	0.49	3.3	0.72	2.08	0.313	2.01	0.307	19.6		0.952946	North Atlantic Craton	[23015] Wasilewski et al., 2019
B-1	SG-041	49.8092	15.6902	11.4052	11.696	7.5139	0.069207	2.78805	0.168074	0.81071	0.0494335	0.23	100	60.5579	215.837	50.6	4864.26	297	110	48	73		248	22	32	1.1	1.8	0.11	2.07	6.8	1.12	5.73	1.91	0.648	2.34	0.45	3.03	0.65	1.9	0.285	1.89	0.29	17.7		0.837856	North Atlantic Craton	[23015] Wasilewski et al., 2019
B-1	SG-281	48.975	13.5127	14.2617	10.9699	8.75223	0.108417	2.20777	0.187266	0.965899	0.0591367		100	58.8511	258.202	60	5795.39	360	167	55	75		169	17	25	1	2.2	0.11	2.39	9.33		9.48	3	0.763	3.34	0.6	3.9	0.84	2.35	0.34	2.22	0.323	22		0.886935	North Atlantic Craton	[23015] Wasilewski et al., 2019
B-2	SG-095	52.8125	13.8507	11.4487	9.51059	8.4231	0.820561	2.13543	0.168067	0.761243	0.0692039	2.4	100	63.1624	302.158	41	4567.46	264	260	43	80	26	103	215	56	1.5	2.3	0.16	5.24	11.4	1.6	7.34	1.99	0.737	2.6	0.45	2.99	0.63	1.81	0.27	1.71	0.279	15.6	0.49	0.422925	North Atlantic Craton	[23015] Wasilewski et al., 2019
B-2	SG-081	50.6012	14.514	11.779	11.0536	8.10727	0.474572	2.44207	0.177965	0.790953	0.0593215	1.08	100	61.5981	259.009	41.1	4745.72	251	288	47	96	11	116	172	52	1.5	2.4	0.19	5.94	12.14	1.6	7.26	2.12	0.76	2.6	0.47	3.1	0.67	1.89	0.292	1.84	0.271	18	0.37	0.389307	North Atlantic Craton	[23015] Wasilewski et al., 2019
B-2	SG-092-DB2	51.5931	14.3524	11.6123	10.9094	7.80263	0.499124	2.22059	0.176221	0.793505	0.0407448	1.44	100	61.0278	177.9	43	4761.03	279	310	43	90	6	123	83	53	1.3	2.5	0.17	5.52	11.8	1.59	7.4	2.02	0.697	2.57	0.46	2.98	0.64	1.87	0.283	1.85	0.287	17.3	0.97	0.436383	North Atlantic Craton	[23015] Wasilewski et al., 2019
B-2	SG-141	50.6277	14.7203	12.6949	11.3932	5.89406	0.523258	3.02108	0.187583	0.878679	0.0592368	1.19	100	51.9698	258.639	47	5272.07	296	190	56	60	11	146	85	62	1.4	2.3	0.18	5.9	13.6	1.97	8.34	2.68	0.923	3.32	0.58	3.72	0.74	2.14	0.327	2.19	0.328	19.6	0.57	0.375615	North Atlantic Craton	[23015] Wasilewski et al., 2019
B-2	SG-238	48.6331	14.4054	13.3011	10.9718	7.86378	0.957072	2.83175	0.197334	0.749871	0.0888005	0.66	100	57.9447	387.721	45.8	4499.23	285	184	52	112	7	84	50	43	1.4	2.2	0.15	4.52	9.99	1.38	6.58	1.95	0.699	2.62	0.45	3.21	0.72	2.04	0.306	2.03	0.293	19.4	0.43	0.468977	North Atlantic Craton	[23015] Wasilewski et al., 2019
B-2	SG-093	48.6822	14.3771	10.8977	16.2274	6.73833	0.376001	1.65243	0.267159	0.712423	0.0692633	0.51	100	59.0334	302.417	36.2	4274.54	219	269	44	72	7	131	393	41	1.3	2	0.17	4.51	10.06	1.4	6.42	1.96	0.676	2.43	0.44	2.95	0.64	1.74	0.276	1.77	0.266	17.4	0.34	0.427288	North Atlantic Craton	[23015] Wasilewski et al., 2019
B-2	SG-096	50.6759	14.2854	11.3715	13.4352	6.3073	0.395442	2.51106	0.207607	0.761226	0.0494303	0.46	100	56.382	215.822	40	4567.36	266	290	44	100	5	121	159	43	1.4	2.3	0.13	5.33	11.7	1.6	7.3	2.11	0.8	2.68	0.47	3.06	0.65	1.9	0.271	1.79	0.294	16.5	0.84	0.415784	North Atlantic Craton	[23015] Wasilewski et al., 2019
B-2	SG-076A	47.9047	15.7705	11.9225	11.2223	9.68971	0.484485	2.13569	0.197749	0.632797	0.0395498	0.84	100	65.4463	172.682	39	3796.78	218	404	57	168	11	105	163	36	1	1.5	0.11	2.51	6.22	0.95	4.76	1.53	0.648	2.02	0.38	2.5	0.57	1.58	0.228	1.52	0.229	14.9	0.37	0.575817	North Atlantic Craton	[23015] Wasilewski et al., 2019
B-2	SG-130	47.9303	15.3934	11.2183	12.9515	9.43182	0.187845	1.98721	0.177959	0.662402	0.0593196	0.36	100	66.2091	259.001	31	3974.41	215	390	51	260	2	126	38	37	1.1	1.6	0.06	3.86	9.5	1.44	6.61	1.96	0.742	2.49	0.45	2.82	0.58	1.69	0.248	1.52	0.237	14.8	0.16	0.399392	North Atlantic Craton	[23015] Wasilewski et al., 2019
B-2	SG-092	51.7007	14.3042	11.5355	10.9333	7.79958	0.49427	2.21433	0.177937	0.790832	0.049427	1.44	100	61.1761	215.808	43	4744.99	280	310	44	90	6	123	82	51	1.3	2.4	0.18	5.57	12	1.59	7.31	2.03	0.691	2.63	0.47	3.03	0.64	1.85	0.278	1.84	0.284	17.3	0.97	0.415167	North Atlantic Craton	[23015] Wasilewski et al., 2019
B-2	SG-091	50.8135	15.5862	11.3977	10.404	8.21838	0.247244	2.34387	0.168126	0.761511	0.0593385	1.39	100	62.6924	259.084	38.5	4569.06	237	306	47	119	8	83	31	55	1.6	2.3	0.19	4.8	10.88	1.51	6.85	1.91	0.713	2.54	0.44	2.95	0.64	1.8	0.262	1.77	0.263	17.3	1.04	0.461694	North Atlantic Craton	[23015] Wasilewski et al., 2019
B-2	SG-097	50.7886	14.0509	11.9697	11.2842	7.75663	0.642268	2.49003	0.18774	0.770722	0.0592863	0.97	100	60.1627	258.856	43	4624.33	277	290	45	90	12	120	124	45	1.3	2.1	0.11	4.79	11.3	1.63	7.38	2.02	0.729	2.75	0.48	3.15	0.68	2.01	0.298	1.87	0.298	17.2		0.422426	North Atlantic Craton	[23015] Wasilewski et al., 2019
B-2	SG-092-DB1	51.7954	14.2516	11.4582	10.9604	7.80131	0.487582	2.22459	0.175733	0.784194	0.0609477	1.44	100	61.3411	266.11	43	4705.17	280	310	44	90	6	123	82	49	1.2	2.3	0.19	5.63	12.1	1.59	7.21	2.05	0.685	2.68	0.47	3.07	0.65	1.82	0.274	1.82	0.281	17.2	0.96	0.393629	North Atlantic Craton	[23015] Wasilewski et al., 2019
B-2	SG-123	48.4045	17.5746	9.40252	12.2051	9.31237	1.34732	1.169	0.168415	0.386364	0.0297203	2.58	100	69.7717	129.765	26	2318.19		400	53	240	25	97	149	21	0.6	0.9	0.04	2.55	5.25	0.66	2.99	0.93	0.474	1.22	0.22	1.4	0.3	0.92	0.133	0.85	0.135	7.9	1.16	0.340071	North Atlantic Craton	[23015] Wasilewski et al., 2019
B-2	SG-244	50.1647	13.238	15.0953	10.9037	6.75691	0.462937	1.81235	0.236394	1.23122	0.0984973	0.85	100	51.0564	430.059	51.1	7387.3	384	139	55	70	19	113	119	65	1.9	3.4	0.21	5.01	12.48	1.88	9.14	2.77	0.98	3.67	0.65	4.33	0.96	2.78	0.418	2.7	0.413	26.8	0.62	0.653896	North Atlantic Craton	[23015] Wasilewski et al., 2019
B-2	SG-102	49.9498	15.0304	12.6323	11.337	6.80415	0.720904	2.25159	0.217259	0.98754	0.0691278	0.76	100	55.6595	301.826	49.2	5925.24	300	225	44	67	12	91	76	39	1.2	2.4	0.17	3.61	9.08	1.38	6.59	2.11	0.758	2.71	0.52	3.51	0.76	2.21	0.327	2.13	0.319	20.6	0.36	0.640577	North Atlantic Craton	[23015] Wasilewski et al., 2019
B-2	SG-139	49.3307	14.4794	12.9656	11.7059	6.84984	0.908048	2.58596	0.236882	0.878438	0.0592205	0.92	100	55.1815	258.568	48	5270.63	308	200	53	50	19	142	192	61	1.3	2.5	0.16	5.69	13.2	1.85	8.27	2.3	0.904	2.95	0.54	3.57	0.73	2.17	0.311	2.05	0.337	19.8	0.35	0.423346	North Atlantic Craton	[23015] Wasilewski et al., 2019
B-2	SG-234	50.9525	16.5618	10.0337	10.9191	6.65244	0.613767	3.17773	0.17819	0.811756	0.0989946	0.62	100	60.7095	432.23	28.4	4870.54	204	265	47	117	13	195	95	66	1.9	3.3	0.23	10.16	21.27	2.69	11.19	2.6	0.871	3.1	0.51	3.27	0.7	1.96	0.284	1.87	0.274	18.7	1.84	0.312959	North Atlantic Craton	[23015] Wasilewski et al., 2019
B-2	SG-106	47.4259	14.2337	12.4133	11.6341	11.5451	0.474457	1.42337	0.207575	0.61284	0.0296535	1.35	100	68.4294	129.473	42.2	3677.04	212	693	65	227	9	94	41	30	0.9	1.2	0.09	2.21	5.61	0.86	4.33	1.45	0.553	1.91	0.36	2.42	0.52	1.51	0.221	1.45	0.211	14.4	0.21	0.523186	North Atlantic Craton	[23015] Wasilewski et al., 2019
B-2	SG-111	47.5377	14.5943	12.7603	11.5213	10.6023	0.375479	1.81811	0.207502	0.553338	0.0296431	0.76	100	65.9444	129.428	30.9	3320.03	166	533	65	368	4	136	48	28	0.9	1.3	0.11	2.19	5.69	0.89	4.58	1.45	0.571	1.8	0.31	1.99	0.41	1.16	0.167	1.09	0.158	10.9	0.27	0.571961	North Atlantic Craton	[23015] Wasilewski et al., 2019
B-2	SG-078A	51.5733	14.6027	13.4985	10.1726	5.86083	0.483469	2.51601	0.197334	1.02614	0.069067	0.64	100	50.2949	301.56	50.8	6156.83	323	19	46	37	5	116	89	39	1.4	2.3	0.17	3.52	9.22	1.45	7.36	2.41	0.903	3.05	0.56	3.8	0.84	2.39	0.355	2.35	0.354	22.8	0.59	0.629582	North Atlantic Craton	[23015] Wasilewski et al., 2019
B-2	SG-104	47.7373	15.0125	11.7053	11.472	11.294	0.405475	1.61201	0.187903	0.54393	0.0296689	1.43	100	69.2175	129.54		3263.58	214	430	61	210	5	85	49	22	0.7	1.2	0.12	2.24	5.51	0.81	4.14	1.29	0.546	1.89	0.36	2.39	0.49	1.36	0.205	1.4	0.227	12.1	0.23	0.516179	North Atlantic Craton	[23015] Wasilewski et al., 2019
B-2	SG-047	48.1956	16.4781	9.01887	14.1495	9.92846	0.326985	1.32776	0.178356	0.376528	0.0198173	0.45	100	71.9538	86.5262	41	2259.17		740	44	170	8	150	91	15	0.5	0.8	0.01	2.66	5.94	0.79	3.25	0.97	0.416	1.33	0.24	1.64	0.36	1.07	0.163	1.03	0.161	9.1		0.289785	North Atlantic Craton	[23015] Wasilewski et al., 2019
B-2	SG-083	50.24	14.8969	11.4	11.781	7.67596	0.425343	2.52239	0.207726	0.791337	0.0593502	1.06	100	61.0774	259.135	41.4	4748.02	253	311	49	107	5	142	79	49	1.5	2.4	0.19	4.94	11.34	1.55	7.21	2	0.741	2.68	0.47	3.13	0.69	1.95	0.294	1.82	0.272	18.5	0.52	0.468114	North Atlantic Craton	[23015] Wasilewski et al., 2019
B-2	SG-085	49.6785	14.4361	14.2903	10.7285	6.39963	0.473316	2.27783	0.207076	1.40023	0.108468	1.04	100	51.0684	473.594		8401.36	388	180	47	120	6	106	40	83	2.2	3	0.19	5.69	14.4	2.16	10.3	3.32	1.19	4.5	0.85	5.49	1.11	3.16	0.473	2.9	0.452	31.8	0.57	0.508015	North Atlantic Craton	[23015] Wasilewski et al., 2019
B-2	SG-090	49.2257	16.0258	10.2198	13.2938	8.4237	0.376146	1.56398	0.188073	0.613712	0.0692901	1.61	100	65.7642	302.534	45	3682.27	248	550	41	130	5	75	66	27	0.8	1.5	0.07	2.96	7.45	1.11	5.14	1.58	0.575	2.08	0.38	2.57	0.54	1.62	0.236	1.48	0.231	13.8		0.488278	North Atlantic Craton	[23015] Wasilewski et al., 2019
B-2	SG-082	49.3994	15.0045	12.4818	11.3991	6.91453	0.740842	2.70654	0.197558	1.07669	0.0790232	1.41	100	56.3513	345.031	45.6	6460.14	300	234	47	114		112	146	45	1.5	3.1	0.21	4.64	11.88	1.8	8.71	2.65	0.881	3.42	0.62	4.03	0.88	2.52	0.381	2.49	0.36	24		0.643741	North Atlantic Craton	[23015] Wasilewski et al., 2019
B-2	SG-113	48.8983	15.9892	9.83663	14.4943	8.03916	0.297013	1.67318	0.207909	0.534624	0.0297013	0.53	100	65.5724	129.682	40.2	3207.74	200	46	44	159	2	167	80	22	0.7	1.1	0.11	1.81	5.01	0.82	4.32	1.45	0.54	1.78	0.31	2.02	0.43	1.19	0.178	1.09	0.16	11.1		0.585573	North Atlantic Craton	[23015] Wasilewski et al., 2019
B-2	SG-070	48.4768	14.197	14.1673	11.821	7.60131	0.483092	1.87322	0.226758	1.08449	0.0690132	1.05	100	55.5636	301.325	45	6506.96	329	212	54	116	7	111	43	21	1.1	2.7	0.19	3.75	10.08	1.6	7.93	2.59	0.883	3.3	0.62	4.15	0.9	2.57	0.382	2.44	0.376	24.5	0.2	0.693745	North Atlantic Craton	[23015] Wasilewski et al., 2019
B-2	SG-230	49.3843	14.6634	13.8634	10.7289	6.24207	0.867776	2.73152	0.226805	1.20305	0.0887498	0.45	100	51.2033	387.499		7218.32	319	110	44	70	14	88	77	85	2.2	3.1	0.19	7.22	17.1	2.38	11	3.16	1.01	3.76	0.75	4.74	0.93	2.83	0.417	2.72	0.422	27.7	1.08	0.413706	North Atlantic Craton	[23015] Wasilewski et al., 2019
B-2	SG-287	47.8076	14.7602	12.1107	13.5351	8.50637	0.355667	2.02533	0.197593	0.652056	0.0493982	0.07	100	62.0767	215.682	33.7	3912.34	204	415	54	216	9	134	44	31	1	1.9	0.15	2.82	7.5	1.17	5.81	1.77	0.715	2.16	0.36	2.34	0.49	1.35	0.197	1.22	0.184	13	0.65	0.64919	North Atlantic Craton	[23015] Wasilewski et al., 2019
B-2	SG-031	47.902	20.7423	7.57363	12.7354	9.10952	0.228483	1.16228	0.109275	0.397362	0.0397362	0.34	100	73.7057	173.496	21.5	2384.17	133	553	47	223	2	136	43	19	0.6	0.9	0.11	2.8	6.44	0.86	3.7	0.99	0.444	1.13	0.2	1.32	0.28	0.79	0.117	0.76	0.114	7.4	0.19	0.309707	North Atlantic Craton	[23015] Wasilewski et al., 2019
B-2	SG-128	47.9057	15.6588	11.3161	11.6749	10.5084	0.237255	1.82884	0.15817	0.662337	0.0494281	0.4	100	68.3961	215.813	29	3974.02	198	440	55	310	1	93	24	37	1.2	1.8	0.08	3.5	9.32	1.44	6.98	1.95	0.701	2.38	0.4	2.54	0.52	1.5	0.223	1.37	0.219	13.1		0.495532	North Atlantic Craton	[23015] Wasilewski et al., 2019
B-2	SG-131	48.841	16.4188	10.7944	11.1767	9.1886	0.23738	2.809	0.158254	0.375852		0.53	100	66.4858		51	2255.11		110	44	80	1	58	26	18	0.6	0.6	0.01	0.8	2.55	0.47	2.43	0.91	0.433	1.19	0.23	1.65	0.38	1.11	0.152	0.97	0.149	9.1		0.722651	North Atlantic Craton	[23015] Wasilewski et al., 2019
B-2	SG-112	49.0975	15.1738	12.2963	11.163	8.26853	0.424787	2.60799	0.197575	0.731029	0.0395151	0.73	100	61.0459	172.531		4386.17	216	240	52	180	6	130	130	21	0.7	1.4	0.11	2.99	7.58	1.11	5.37	1.81	0.752	2.11	0.4	2.5	0.48	1.31	0.183	1.2	0.199	12.6	0.15	0.451153	North Atlantic Craton	[23015] Wasilewski et al., 2019
B-2	SG-079	52.3874	14.678	10.8237	10.7883	7.56168	0.19795	2.42488	0.19795	0.890774	0.0494874	0.88	100	61.9504	216.072		5344.64	320	390	51	110	15	125	43	33	1.2	1.8	0.17	2.9	7.7	1.18	5.92	2.01	0.789	2.65	0.46	2.91	0.58	1.66	0.231	1.51	0.236	14.1	0.27	0.598056	North Atlantic Craton	[23015] Wasilewski et al., 2019
B-2	SG-038A	48.6999	14.606	13.9418	10.2864	7.80106	0.394491	2.68254	0.207108	1.30182	0.0788982		100	56.5976	344.485		7810.92	318	210	51	110	2	227	79	56	1.6	2.1	0.14	3.49	9.81	1.57	7.66	2.56	0.941	3.32	0.62	4.02	0.82	2.44	0.362	2.39	0.392	24.1		0.579777	North Atlantic Craton	[23015] Wasilewski et al., 2019
B-2	SG-071	49.5962	14.9765	13.5742	11.1288	6.70885	0.384772	2.21984	0.197319	1.12472	0.0887936	0.92	100	53.5276	387.691		6748.32	342	240	49	130	8	111	42	51	1.7	3	0.28	5.22	13.2	1.89	9.59	2.81	1.03	3.86	0.69	4.44	0.91	2.61	0.391	2.52	0.379	23.7	0.28	0.553755	North Atlantic Craton	[23015] Wasilewski et al., 2019
B-2	SG-072	48.2298	15.2871	13.5674	10.6684	7.81624	0.493449	2.51659	0.19738	1.13493	0.0888209	0.84	100	57.3126	387.81		6809.6	350	240	52	150	11	93	50	57	1.7	2.8	0.27	4.39	11.2	1.61	8.55	2.83	0.982	3.65	0.66	4.22	0.89	2.59	0.392	2.49	0.394	24	0.37	0.614555	North Atlantic Craton	[23015] Wasilewski et al., 2019
B-2	SG-110	47.4467	17.0047	9.72448	12.5256	10.8905	0.336923	1.51615	0.148642	0.38647	0.019819	1.16	100	72.2988	86.5336		2318.82	136	550	56	280	4	96	37	15	0.5	1	0.09	1.53	4.08	0.61	2.78	0.98	0.459	1.37	0.25	1.6	0.32	0.93	0.14	0.95	0.153	8.8		0.629761	North Atlantic Craton	[23015] Wasilewski et al., 2019
B-2	SG-055	46.6356	16.1134	10.0882	10.5143	14.5773	0.475671	1.06035	0.188287	0.327024	0.0198196	1.82	100	77.1038	86.5364		1962.14	143	820	69	440	7	82	43	13	0.4	1.1	0.13	1.65	4.04	0.55	2.69	0.84	0.381	0.99	0.18	1.22	0.26	0.81	0.121	0.78	0.116	7.2		0.642356	North Atlantic Craton	[23015] Wasilewski et al., 2019
B-2	SG-044	47.0966	15.8303	14.3725	11.0694	8.22072	0.364708	1.64611	0.22671	1.08427	0.0887128		100	57.1366	387.337	47	6505.6	339	200	53	110	3	220	70	52	1.6	2.4	0.1	4.5	12.9	2.04	9.76	3.07	0.986	3.84	0.73	5.06	1.07	3.11	0.453	3.01	0.471	25.7	0.28	0.513885	North Atlantic Craton	[23015] Wasilewski et al., 2019
B-2	SG-053	47.3845	14.8354	14.4279	11.7697	8.23093	0.236578	1.62647	0.246435	1.16317	0.0788592	0.57	100	57.0728	344.315		6979.04	340	290	54	140	12	114	43	38	1.3	1.6	0.09	3.22	9.35	1.49	7.95	2.6	0.983	3.42	0.67	4.27	0.9	2.51	0.387	2.53	0.392	24.5		0.478775	North Atlantic Craton	[23015] Wasilewski et al., 2019
B-2	SG-043	49.01	15.5029	11.4715	11.6964	8.77969	0.227402	2.35311	0.16808	0.741527	0.0494352	0.78	100	64.0758	215.844	34	4449.16	235	310	50	180		107	28	41	1.2	1.8	0.08	3.28	9.51	1.51	6.85	2.22	0.709	2.73	0.48	3.16	0.67	1.96	0.278	1.87	0.296	17.3		0.528769	North Atlantic Craton	[23015] Wasilewski et al., 2019
B-2	SG-129	48.1996	14.9759	11.667	11.5161	9.92461	0.444828	2.23403	0.177931	0.810576	0.0494254	0.76	100	66.4706	215.801	33	4863.46		440	55	270	3	86	43	42	1.3	1.7	0.06	2.53	7.21	1.12	5.57	1.85	0.676	2.58	0.46	3.02	0.62	1.78	0.26	1.62	0.244	15.5		0.647434	North Atlantic Craton	[23015] Wasilewski et al., 2019
B-2	SG-060	47.7403	15.0347	10.3866	9.83151	14.7572	0.396432	1.25867	0.188305	0.386521	0.0198216	2.15	100	76.8043	86.5449	26	2319.13	143	890	66	440	7	91	48	16	0.6	1.2	0.12	2.99	7.13	0.92	3.83	1.17	0.393	1.18	0.22	1.47	0.3	0.83	0.125	0.83	0.128	8	0.09	0.386703	North Atlantic Craton	[23015] Wasilewski et al., 2019
B-2	SG-117	48.6064	12.2825	12.9255	12.0553	10.9881	0.494068	1.63042	0.21739	0.750983	0.0494068	1.32	100	66.4562	215.72		4505.9	226	700	68	360	7	113	81	34	1	1.8	0.29	3.32	8.5	1.17	6	1.89	0.694	2.38	0.4	2.45	0.48	1.4	0.217	1.38	0.203	14.4	0.22	0.522398	North Atlantic Craton	[23015] Wasilewski et al., 2019
B-2	SG-075	49.7185	16.7613	9.47922	11.8222	9.25341	0.466142	1.78522	0.168604	0.515731	0.0297537	1.63	100	69.4655	129.911		3094.39		860	52	200	15	126	110	16	0.6	1.3	0.13	2.05	5.25	0.72	3.29	1.1	0.484	1.48	0.26	1.76	0.36	0.99	0.151	1.02	0.155	9.3		0.611022	North Atlantic Craton	[23015] Wasilewski et al., 2019
B-2	SG-288	47.7649	13.5318	15.1262	12.4287	7.37648	0.472725	2.02878	0.246211	0.965147	0.0590906		100	53.1944	258.001	35.3	5790.88	259	160	57	133	6	112	46	43	1.4	4.3	0.31	7.28	20.18	2.93	12.75	3.32	0.983	3.48	0.57	3.5	0.74	2.07	0.296	1.99	0.289	20	0.52	0.569121	North Atlantic Craton	[23015] Wasilewski et al., 2019
B-2	SG-056	47.5771	16.8205	9.88105	10.1101	13.837	0.356828	0.822687	0.15859	0.4163	0.0198238	0.36	100	76.5453	86.5546		2497.8	149	759	65	371	10	89	78	20	0.7	1.2	0.16	2.48	6.99	1.03	4.66	1.28	0.411	1.51	0.27	1.8	0.37	1.12	0.162	1.09	0.159	10.1	0.12	0.466226	North Atlantic Craton	[23015] Wasilewski et al., 2019
B-2	SG-035	49.4675	16.0211	11.0238	12.5103	6.66555	0.21757	2.88775	0.197791	0.939506	0.0692268	0.25	100	58.4914	302.258	47	5637.04	288	150	39	70		209	37	44	1.3	2	0.09	2.97	9.31	1.48	7.44	2.59	0.829	3.17	0.57	3.76	0.81	2.36	0.339	2.17	0.357	20.7		0.648845	North Atlantic Craton	[23015] Wasilewski et al., 2019
B-2	SG-042	48.4124	15.7673	8.33173	14.6963	10.9875	0.19833	1.09082	0.138831	0.356995	0.019833	0.84	100	75.4502	86.5949	40	2141.97	184	890	44	200	3	88	16	11	0.5	0.6		0.97	3.17		2.59	0.83	0.354	1.12	0.21	1.41	0.31	0.89	0.133	0.82	0.132	7.7		0.596001	North Atlantic Craton	[23015] Wasilewski et al., 2019
B-2	SG-033A	47.5617	16.0159	8.3872	13.8143	11.9598	0.158671	1.5768	0.12892	0.376844	0.0198339	0.75	100	76.869	86.5987	41	2261.07	193	1090	47	220	1	91	11	17	0.6	0.8	0.02	1.85	5.52		3.65	1.09	0.429	1.18	0.21	1.35	0.29	0.82	0.124	0.79	0.118	7.2		0.416664	North Atlantic Craton	[23015] Wasilewski et al., 2019
B-2	SG-057	46.3686	16.9378	10.1436	10.7507	13.8294	0.395974	1.04933	0.168289	0.336578	0.0197987	0.51	100	76.0612	86.445	24.2	2019.47	136	810	67	410	4	84	42	18	0.5	1	0.07	3.37	9.64		5.17	1.16	0.406	1.21	0.21	1.33	0.27	0.73	0.112	0.7	0.105	7.1	0.21	0.285915	North Atlantic Craton	[23015] Wasilewski et al., 2019
B-2	SG-057-DB1	46.359	16.9369	10.1442	10.7544	13.8257	0.400164	1.05043	0.168069	0.34114	0.0200082	0.51	100	76.0553	87.3598	26	2046.84	136	810	67	410	4	84	42	18	0.5	1	0.07	3.37	9.64		5.17	1.16	0.406	1.21	0.21	1.33	0.27	0.73	0.112	0.7	0.105	7.1	0.21	0.285915	North Atlantic Craton	[23015] Wasilewski et al., 2019
B-2	SG-034	47.0443	14.7539	9.78312	13.6251	12.9122	0.326765	0.980295	0.188137	0.386177		1.13	100	75.4655		48	2317.06		1120	53	250	4	70	32	12	0.5	0.5		1.22	4.27		3.31	0.98	0.387	1.37	0.26	1.74	0.38	1.16	0.171	1.1	0.17	10.8		0.394891	North Atlantic Craton	[23015] Wasilewski et al., 2019
B-1	JEH-SG-03	49.7485	14.3718	13.7688	11.2562	7.47736	0.161808	1.94974	0.217085	0.975875	0.0727635	1.26	100	55.8619	317.7		5855.25	275	164	48.6	108	4.05	79.2	19.5	51.2	1.56	2.77	0.162	3.31	8.83	1.41	7.27	2.4	0.837	3.12	0.559	3.69	0.786	2.22	0.338	2.28	0.351	21.7	0.269	0.806341	North Atlantic Craton	[23072] Tusch et al., 2019
B-1	010-41	49.8381	14.0233	14.7295	10.9967	6.67871	0.200765	2.11862	0.234057	1.09967	0.0807094	0.69	100	51.3786	352.393		6598	306	86.8	50.5	80.4	4.21	91.9	38.3	63.4	1.92	3.18	0.187	4.02	10.7	1.64	8.47	2.75	0.928	3.59	0.646	4.35	0.927	2.63	0.406	2.7	0.41	25.2	0.432	0.762199	North Atlantic Craton	[23072] Tusch et al., 2019
B-2	JEH-2007-04	49.9066	14.4039	13.5924	10.6508	7.91202	0.672522	1.71427	0.213016	0.868293	0.0661364	1.91	100	57.5653	288.764		5209.76	260	220	52.2	114	42.2	69.4	51.7	49.4	1.53	2.17	0.131	2.98	7.85	1.25	6.57	2.21	0.755	2.93	0.532	3.54	0.761	2.16	0.332	2.19	0.337	21	0.287	0.701634	North Atlantic Craton	[23072] Tusch et al., 2019
B-2	72 MAFIC	51.488	6.28154	10.6065	14.9315	14.7256	0.144166	1.05036	0.236845	0.51488	0.0205952	3.29	100	76.3903	89.9227		3089.28	210		53.8	5.5	0.6	143	10	27.8	0.9	1.8	0.1	2.5	6.4	0.89	4.6	1.2	0.38	1.67	0.31	1.92	0.44	1.26	0.18	1.09	0.17	11.5	0.476	0.693745	North Atlantic Craton	[23072] Tusch et al., 2019
B-2	JEH-2007-01	52.7011	13.6703	11.5002	9.28019	9.73019	0.140003	1.93004	0.180004	0.820016	0.048001	1.52	100	66.3504	209.582	35.4	4920.1	195	493	39.2	75		86	8.62	56.58	1.724	2.3	0.15	4.11	10.2	1.52	6.734	2.083	0.761	2.93	0.52	3.41	0.714	1.98	0.295	1.95	0.2864	17.3	0.667	0.539204	North Atlantic Craton	[23081] Hoffmann et al., 2011
B-1	462920	46.4953	11.0805	19.2327	9.96837	10.0806	0.550964	1.40802	0.285685	0.846852	0.0510152	1.16	100	54.9854	222.742	50	5081.11	316	272	80	107	17.9	18	28	66.8	1.97	2.09	0.15	2.438	6.737	1.123	6.332	2.762	1.234	4.36	0.789	5.432	1.103	2.994	0.425	2.64	0.344	27.2	0.54	0.826	North Atlantic Craton	[5951] Polat et al., 2003
B-1	462926	47.9652	11.8688	18.8081	9.42906	8.57914	0.779922	1.39986	0.259974	0.889911	0.019998	0.8	100	51.5277	87.3152	39	5339.47	330	333	78	118	19.9	16	49	68.5	2.08	2.46	0.16	2.994	8.024	1.28	6.915	2.47	1.089	3.609	0.625	4.163	0.857	2.449	0.353	2.208	0.302	20.9	0.53	0.791682	North Atlantic Craton	[5951] Polat et al., 2003
B-1	462925	49.3349	11.6012	18.4918	9.22092	8.26083	0.630063	1.26013	0.260026	0.90009	0.040004	1.34	100	51.0068	174.665	49	5400.54	314	339	53	120	16.1	15	42	67.9	1.784	2.46	0.18	2.898	8.006	1.246	6.486	2.473	1.064	3.273	0.608	4.094	0.861	2.432	0.355	2.057	0.263	19.9	0.61	0.817907	North Atlantic Craton	[5951] Polat et al., 2003
B-2	462956	52.96	11.72	13.01	13	5.37	0.31	2.4	0.26	0.9	0.07	2.64	100	49.0299	305.634	34	5400	226	195	39	92	5.44	218	27	65.7	2.26	2.92	0.16	6.271	15.199	2.268	10.94	3.397	1.006	3.756	0.585	3.459	0.708	1.991	0.308	1.858	0.246	19.2	0.48	0.448656	North Atlantic Craton	[5951] Polat et al., 2003
B-2	462958	53.75	11.75	12.82	10.59	6.59	0.17	3.13	0.25	0.89	0.06	1.16	100	54.5035	261.972	32	5340	231	168	60	98	0.81	207	10	66.8	2.12	2.85	0.16	5.331	13.161	1.973	9.914	2.822	0.951	3.46	0.546	3.449	0.678	1.851	0.263	1.649	0.243	17.3	0.51	0.515114	North Atlantic Craton	[5951] Polat et al., 2003
B-2	462921	46.5547	12.0512	19.2119	8.37084	9.89099	1.30013	1.41014	0.250025	0.920092	0.040004	1.58	100	54.5418	174.665	50	5520.55	308	310	60	119	48.1	21	72	66		2.48	0.19	4.277	10.981	1.707	9.092	3.484	1.26	4.571	0.792	5.11	1.016	2.733	0.386	2.275	0.295	22.4	0.66	0.558701	North Atlantic Craton	[5951] Polat et al., 2003
B-2	462939	50.97	10.98	17.47	9.99	7.21	0.53	1.61	0.3	0.84	0.1	0.48	100	49.0268	436.62	36	5040	272	166	52	88	11.3	31	53	63.3	1.695	2.66	0.15	5.838	14.781	2.251	10.942	3.416	1.055	4.1	0.653	4.14	0.804	2.14	0.311	1.889	0.251	20.5	0.51	0.43902	North Atlantic Craton	[5951] Polat et al., 2003
B-2	462942	45.3655	11.4189	20.358	11.7688	8.13919	0.59994	1.08989	0.359964	0.839916	0.059994	0.57	100	48.2333	261.946	26	5039.5	256	159	84	101	16.3	40	59	65.4	1.98	2.65	0.16	3.811	10.65	1.69	8.538	2.776	0.945	3.449	0.583	3.741	0.744	2.202	0.292	1.86	0.261	19.4	0.46	0.669999	North Atlantic Craton	[5951] Polat et al., 2003
B-2	462937	46.1946	11.3611	19.582	11.5512	8.26083	0.450045	1.37014	0.340034	0.840084	0.050005	0.89	100	49.575	218.332	36	5040.5	245	167	60	99	11.5	35	34	65.6	2.14	2.54	0.16	3.507	10.531	1.668	8.342	2.839	0.95	3.777	0.618	3.923	0.801	2.26	0.334	1.86	0.248	19.9	0.5	0.697855	North Atlantic Craton	[5951] Polat et al., 2003
AUK	283629	51.8499	8.83975	9.79457	5.92313	21.0556	0.499421	1.44832	0.169803	0.339606	0.0799074	0.79	100	83.3609	348.891	22	2037.64	131	2860	17	934	13	155	251	51		1.3		11	15		6											8	2	0.113872	North Atlantic Craton	[6045] Garde, 1997
AUK	289155	51.5547	8.46406	11.2034	7.13616	18.5601	0.598059	1.74349	0.162186	0.50683	0.0709562	1.44	100	79.4273	309.809	19	3040.98	151	3220	94	69	18	198	239	58		3		13	16		8											9	3	0.222354	North Atlantic Craton	[6045] Garde, 1997
AUK	339534	51.54	10.288	9.82743	6.81868	18.4864	0.549894	1.82965	0.159969	0.399923	0.0999807	0.84	100	81.4262	436.535	21	2399.54	144	2270	88	738	13	192	280	59		2.9		11	15		7											10	2	0.254023	North Atlantic Craton	[6045] Garde, 1997
B-2	339508	51.6901	15.6862	8.70165	9.37349	9.48424	0.83566	3.53393	0.151023	0.463137	0.0805455	0.91	100	71.7522	351.678	31.2	2778.82	177	697	57	143	5	311	29	42	1	3		11	23		11	2.23	0.7		0.4					1.51	0.2	13		0.262782	North Atlantic Craton	[6045] Garde, 1997
B-2	278758	50.7822	14.2018	11.0061	9.36778	10.1684	0.760632	2.98248	0.150125	0.540449	0.0400332	0.98	100	68.2855	174.793	36.3	3242.69		690	74	142	7.7	182	178	37	0.6	3		4.3	9		3	1.37	0.58		0.4					1.78	0.22	14		0.672233	North Atlantic Craton	[6045] Garde, 1997
B-2	278812	53.3909	13.4228	10.755	9.2388	9.81936	0.520496	1.9919	0.160153	0.620591	0.0800763	0.98	100	68.0283	349.629	28	3723.55	194	676	78	194	12	204	238	65		2.9		16	18		11											15	3	0.174641	North Atlantic Craton	[6045] Garde, 1997
B-2	289141	48.0763	15.1979	11.6785	10.9796	10.5154	0.544945	2.16969	0.181648	0.625678	0.0302747	1.61	100	67.7253	132.185	31.1	3754.07	214	571	75	219	9	113	108	41	1	2		9	9		7	1.51	0.6		0.4					1.7	0.21	17		0.214119	North Atlantic Craton	[6045] Garde, 1997
B-2	289116	53.9035	11.0116	10.8133	7.51838	13.3504	0.692615	1.99754	0.160606	0.461743	0.090341	1.2	100	74.2088	394.447	24	2770.46	166	1300	74	274	20	248	314	64		3.4		21	23		11											12		0.156001	North Atlantic Craton	[6045] Garde, 1997
B-2	339105	52.4663	12.3397	9.78284	8.22981	13.7331	0.63152	2.13514	0.150362	0.421013	0.110265	1.23	100	76.5892	481.441	26	2526.08	152	1460	69	479	13	248	317	61		3.5		13	21		9											9	1	0.259413	North Atlantic Craton	[6045] Garde, 1997
B-2	339196	53.2424	10.9567	10.3855	7.30444	14.749	0.770468	1.85113	0.170103	0.46028	0.110067	1.18	100	76.7962	480.574	28	2761.68	165	1730	77	456	23	255	325	61		3		13	26		13											10	3	0.222354	North Atlantic Craton	[6045] Garde, 1997
ADK	465429	47.9396	8.24165	13.7728	9.38188	19.2539	0.430086	0.040008	0.190038	0.720144	0.030006	4.61	100	76.5146	131.012		4320.86	234	2468	85	746	0.4	18	5	49.2		2.25	0.16	2.76	7.54	1.19	6.33	2.22	0.64	2.91	0.47	3.14	0.62	1.65	0.23	1.56	0.1	16.7	2.12	0.78549	North Atlantic Craton	[7552] Polat and Hofmann, 2003
ADK	465428	48.24	7.93	14.05	8.93	19.52	0.39	0.04	0.19	0.68	0.03	4.56	100	76.403	130.986		4080	190	2916	91	896	0.3	11	1.2	41.9		1.46	0.12	3.95	9.82	1.41	7.42	2.38	0.63	2.41	0.38	2.33	0.48	1.31	0.18	1.36	0.18	13.1	0.41	0.356142	North Atlantic Craton	[7552] Polat and Hofmann, 2003
ADK	465432	47.81	8.24	14.49	8.78	19.37	0.36	0.06	0.19	0.67	0.03	4.48	100	75.7009	130.986		4020	225	2588	92	749	1.4	11	2	48.1		1.94	0.13	2.63	7.61	1.2	6.21	2.24	0.65	2.85	0.47	3.1	0.6	1.63	0.24	1.52	0.11	16.7	0.39	0.710744	North Atlantic Craton	[7552] Polat and Hofmann, 2003
ADK	465427	49.38	8.24	13.65	8.98	18.09	0.66	0.06	0.2	0.71	0.03	2.82	100	75.5415	130.986		4260	204	2200	84	632	0.5	7	2.1	43.8		1.6	0.13	3.03	8.62	1.32	6.47	2.28	0.74	2.54	0.4	2.37	0.53	1.44	0.18	1.31	0.2	13.2	0.36	0.508797	North Atlantic Craton	[7552] Polat and Hofmann, 2003
ADK	465419	51.29	6.04	11.72	10.5	19.35	0.35	0.04	0.17	0.52	0.02	3.79	100	79.3717	87.3239		3120	231	3169	60	412	0.9	19	1	26.7		0.8	0.08	0.82	2.96	0.57	3.26	1.35	0.45	1.7	0.26	1.71	0.4	1.11	0.16	1.08	0.12	9.4	0.15	0.940034	North Atlantic Craton	[7552] Polat and Hofmann, 2003
ADK	465431	50.185	6.46065	12.8713	9.76098	19.572	0.390039	0.040004	0.190019	0.50005	0.030003	2.42	100	77.9917	130.999		3000.3	148	2051	100	952	0.7	12	1.2	33.8		1.49	0.1	1.8	5.33	0.84	4.64	1.61	0.44	1.97	0.32	2.08	0.4	1.1	0.15	1.04	0.07	12.3	0.25	0.797592	North Atlantic Craton	[7552] Polat and Hofmann, 2003
AUK	2000-17	50.9147	5.6783	11.5165	9.22723	21.8534	0.009997	0.239928	0.189943	0.359892	0.009997	3.48	100	81.5576	43.6489		2159.35	104	2016	88	1100	0.8	9	4			0.71	0.05	0.43	1.7	0.35	2.17	0.84	0.52	1.16	0.21	1.33	0.31	0.83	0.13	0.9	0.17	8.9	0.32	1.59095	North Atlantic Craton	[7552] Polat and Hofmann, 2003
B-1	465435	50.96	15.8	14.49	9.38	5.25	0.25	2.89	0.4	0.57	0.01	5.29	100	45.7814	43.662		3420	252	2315	86	462	98.2	43	48	28.5		0.75	0.07	0.86	2.22	0.36	2.13	0.72	0.25	1.24	0.22	1.78	0.41	1.35	0.2	1.56	0.22	13	0.11	0.840292	North Atlantic Craton	[7552] Polat and Hofmann, 2003
B-1	465451	52.92	14.1	12.18	9.71	5.98	4.03	0.1	0.2	0.74	0.04	3.18	100	53.3626	174.648		4440	290	195	43	44	1.3	102	41	51.6		1.89	0.14	2.39	6.51	1.03	5.29	1.81	0.65	2.53	0.47	3.32	0.69	1.98	0.3	1.91	0.14	19.6	0.24	0.761958	North Atlantic Craton	[7552] Polat and Hofmann, 2003
B-2	465448	53.56	13.73	12.06	8.23	7.85	3.56	0.14	0.17	0.67	0.03	0.86	100	60.2694	130.986		4020	263	437	49	63	1.1	112	39	46.4		1.62	0.12	3.37	7.2	1.12	5.81	1.89	0.6	2.62	0.46	3.12	0.65	1.82	0.27	1.77	0.12	17.1	0.89	0.463183	North Atlantic Craton	[7552] Polat and Hofmann, 2003
B-2	36770	51.6252	8.31083	12.9813	8.61086	14.7815	0.540054	2.26023	0.190019	0.620062	0.080008	1.2	100	72.6303	349.331		3720.37	151	1366	78	456	21.2	102	50.4	57.5		1.41	0.12	4.51	9.89	1.44	6.42	2.11	0.65	2.41	0.39	2.55	0.48	1.28	0.19	1.23	0.19	12.9	0.66	0.301238	North Atlantic Craton	[7552] Polat and Hofmann, 2003
B-2	36800	51.2	8.38	12.84	10.03	14.42	0.07	2.19	0.19	0.62	0.06	0.98	100	72.3549	261.972		3720	149	1621	80	516	1.9	131	8.2	55.6		1.4	0.12	3.84	9.24	1.35	6.53	1.79	0.55	2.09	0.31	2.23	0.47	1.2	0.17	1.24	0.15	12.1	0.63	0.351289	North Atlantic Craton	[7552] Polat and Hofmann, 2003
B-2	36861	51.4749	8.87911	12.4388	9.48905	14.6185	0.009999	2.21978	0.189981	0.59994	0.079992	1.14	100	73.2542	349.261		3599.64	147	1634	77	483	0.6	126	5.2	57.4		1.35	0.12	4.36	10.4	1.46	6.35	1.81	0.6	2.2	0.31	2.06	0.43	1.1	0.17	1.21	0.16	11.8	0.82	0.298342	North Atlantic Craton	[7552] Polat and Hofmann, 2003
B-2	2000-13	50.72	8.3	13.41	11.01	13.98	0.07	1.57	0.22	0.64	0.08	1.19	100	70.8417	349.296		3840	170	1414	73	465	2	91	10.5	46.6		1.21	0.1	3.38	8.82	1.34	6.31	2.04	0.65	2.79	0.4	2.48	0.53	1.3	0.21	1.23	0.2	14	0.63	0.344934	North Atlantic Craton	[7552] Polat and Hofmann, 2003
B-2	465491	52.7953	14.4614	11.7512	8.92089	6.53065	3.76038	0.810081	0.180018	0.750075	0.040004	5.07	100	56.4301	174.665		4500.45	272	210	47	45	27.1	46	397	51.5		1.88	0.14	2.75	7.21	1.1	5.82	2.06	0.57	2.79	0.48	3.44	0.71	2	0.3	2.02	0.15	17.9	0.16	0.658707	North Atlantic Craton	[7552] Polat and Hofmann, 2003
B-2	36739	51.94	8.67	12.24	9.56	14.5	0.01	2.24	0.19	0.58	0.07	1.08	100	73.4099	305.634		3480	140	1581	74	474		133	4.7	55.8		1.36	0.12	4.15	9.79	1.34	6.38	1.57	0.58	1.97	0.29	1.88	0.44	1.08	0.18	1.14	0.15	11	0.79	0.315761	North Atlantic Craton	[7552] Polat and Hofmann, 2003
B-2	36678	51.7052	10.281	13.6314	11.4011	9.36094	0.150015	2.37024	0.250025	0.780078	0.070007	2.11	100	61.5444	305.664		4680.47	210	594	57	127	0.6	56	9.1	49		1.54	0.13	2.96	7.73	1.17	5.85	1.84	0.64	2.81	0.46	2.91	0.63	1.58	0.25	1.67	0.24	16.6	0.4	0.501298	North Atlantic Craton	[7552] Polat and Hofmann, 2003
B-2	465425	50.9451	7.72077	12.9813	10.161	15.6916	1.49015	0.070007	0.220022	0.640064	0.080008	1.66	100	73.8019	349.331		3840.38	179	1142	80	655	0.6	95	6	64		1.69	0.12	9.77	23.73	3.34	14.71	3.81	1.08	3.59	0.5	3.02	0.68	1.85	0.24	1.61	0.21	16.7	0.47	0.166671	North Atlantic Craton	[7552] Polat and Hofmann, 2003
B-2	36617	51.0898	7.95841	13.0374	10.088	15.177	0.009998	1.77964	0.19996	0.59988	0.059988	1.09	100	73.0673	261.919		3599.28	140	1587	76	552		113	4.1	48.3		1.31	0.11	3.14	7.8	1.12	5.7	1.85	0.58	2.21	0.37	2.19	0.47	1.13	0.17	1.16	0.18	10.9	0.62	0.401984	North Atlantic Craton	[7552] Polat and Hofmann, 2003
B-2	462933	49.4	11.76	17.55	10.22	8.43	1.02	0.37	0.32	0.88	0.05	5.1	100	52.8177	218.31		5280	228	366	65	130	10.2	21	26	66.2		2.62	0.16	3.74	10.36	1.63	8.2	2.67	0.85	3.16	0.52	3.29	0.66	1.91	0.28	1.65	0.23	16.5	0.46	0.674989	North Atlantic Craton	[7552] Polat and Hofmann, 2003
B-2	2000-19	50.9602	7.9916	13.1126	10.052	15.2831	0.05001	1.72034	0.170034	0.590118	0.070014	1.03	100	73.0912	305.695		3540.71	147	1648	81	597	0.8	102	3.5	53.7		1.37	0.12	4.7	10.69	1.38	7.29	2.1	0.64	2.4	0.37	2.33	0.48	1.22	0.18	1.12	0.18	12.3	0.69	0.28086	North Atlantic Craton	[7552] Polat and Hofmann, 2003
B-2	2000-14	48.7649	8.89089	14.6115	11.3911	13.9814	0.120012	1.27013	0.230023	0.670067	0.070007	1.36	100	69.0403	305.664		4020.4	174	1559	82	554	3.5	38	10.5	50.9		1.33	0.12	4.18	10.49	1.48	7.45	2.51	0.76	3.12	0.44	3	0.59	1.54	0.22	1.48	0.24	15.9	0.63	0.306579	North Atlantic Craton	[7552] Polat and Hofmann, 2003
B-2	465424	52.1804	10.9322	11.9824	9.5219	11.7023	1.95039	0.630126	0.160032	0.90018	0.040008	1.38	100	69.4753	174.683		5401.08		893	51	140	21	92	52.8	56.2		1.88	0.16	3.04	8.67	1.38	7.15	2.55	0.88	2.95	0.49	3.22	0.65	1.83	0.24	1.73	0.22	17.3	0.4	0.59587	North Atlantic Craton	[7552] Polat and Hofmann, 2003
B-2	465454	52.4952	12.1412	12.1412	10.091	10.5511	1.38014	0.360036	0.170017	0.640064	0.030003	2.06	100	66.9451	130.999		3840.38		558	52	84	11.9	90	258	42.9		1.65	0.12	2.29	6.25	0.95	4.89	1.77	0.58	2.5	0.41	2.87	0.61	1.78	0.27	1.67	0.13	17.4	0.22	0.69425	North Atlantic Craton	[7552] Polat and Hofmann, 2003
B-2	465487	53.14	13.88	12.82	8.09	6.5	4.53	0.04	0.19	0.77	0.04	2.85	100	54.1623	174.648		4620	300	185	46	42	0.3	80	7	51.4		2	0.14	2.81	7.67	1.16	6.12	2.07	0.71	2.82	0.51	3.44	0.72	2.04	0.3	1.98	0.14	19.5	1.3	0.68579	North Atlantic Craton	[7552] Polat and Hofmann, 2003
B-2	465453	53.1	14.17	12.68	8.52	7.16	3.3	0.1	0.17	0.76	0.04	2.3	100	56.8214	174.648		4560	285	144	42	40	1.1	99	47	54.2		1.93	0.13	2.62	7.31	1.13	5.85	2.02	0.69	2.65	0.48	3.35	0.73	2.03	0.3	1.95	0.14	20.5	0.39	0.709779	North Atlantic Craton	[7552] Polat and Hofmann, 2003
B-2	36831	51.18	8	13.43	9.45	14.81	0.39	1.85	0.19	0.63	0.07	1.15	100	71.9886	305.634		3780	150	1383	81	493	17.9	92	52.7	51.3		1.44	0.12	2.39	6.3	0.91	5.07	1.56	0.54	2.02	0.33	2.37	0.43	1.2	0.17	1.09	0.17	11.8	0.6	0.58054	North Atlantic Craton	[7552] Polat and Hofmann, 2003
B-2	465402	51.5652	5.94059	11.5712	10.8911	17.2917	1.39014	0.70007	0.180018	0.460046	0.010001	2.39	100	77.6918	43.6663		2760.28	128	1447	81	1157	28.4	25	194	41.2		1	0.08	1.58	4.57	0.71	3.76	1.22	0.57	1.48	0.25	1.62	0.34	0.9	0.15	0.88	0.14	9.1	0.57	0.609832	North Atlantic Craton	[7552] Polat and Hofmann, 2003
B-2	465418	49.2751	10.059	15.3285	11.3889	10.9089	0.769923	1.12989	0.219978	0.879912	0.039996	1.54	100	62.3857	174.63		5279.47	252	864	63	189	40.5	32	45.4	55.6		1.83	0.15	2.67	8.56	1.45	7.43	2.61	0.85	3.18	0.52	3.08	0.66	1.87	0.27	1.64	0.25	17.7	0.35	0.6604	North Atlantic Craton	[7552] Polat and Hofmann, 2003
B-2	465417	49.605	11.8988	14.9385	9.33907	9.989	1.42986	1.50985	0.189981	1.0499	0.049995	1.24	100	60.9122	218.288		6299.37	248	194	59	88	62.8	78	75.1	70.6		2.26	0.18	3.52	10.53	1.66	9.01	3.26	1.11	4.12	0.62	3.96	0.81	2.08	0.32	1.97	0.3	21.7	0.45	0.618633	North Atlantic Craton	[7552] Polat and Hofmann, 2003
B-2	36647	51.0051	8.09081	13.0013	10.101	15.1415	0.010001	1.80018	0.190019	0.590059	0.070007	1.1	100	73.0758	305.664		3540.35	136	1560	75	570		129	4.6	49.9		1.28	0.11	3.07	8.18	1.13	5.6	1.73	0.58	2.12	0.34	2.08	0.46	1.14	0.17	1.13	0.15	10.8	0.68	0.401734	North Atlantic Craton	[7552] Polat and Hofmann, 2003
B-2	465401	53.1206	10.7421	14.0028	8.92178	8.86177	2.87057	0.130026	0.420084	0.870174	0.060012	1.29	100	59.5939	262.024		5221.04	256	565	61	121	0.6	44	10.1	65.3		2.04	0.19	3.58	10.02	1.45	7.13	2.45	0.9	3.24	0.51	3.34	0.72	2.02	0.3	1.96	0.3	20	0.78	0.549053	North Atlantic Craton	[7552] Polat and Hofmann, 2003
B-2	362684	50.4299	15.6888	11.8347	6.8955	12.1778	0.0632614	2.07708	0.179241	0.622071	0.0316307	5.99	100	70.5716	138.106	30	3732.42	211	817	54	303	1.2	117	27	45		2.6		5	9		4											13	1	0.501038	North Atlantic Craton	[9713] Marshall and Schoenwandt, 1999
B-2	362652	51.1467	17.9444	11.5585	5.35183	9.57032	1.33271	2.18271	0.1679	0.713577	0.0314813	5.55	100	65.8661	137.454	30	4281.46	218	538	53	213	44	99	297	49		2.6		4	10		6											18		0.626297	North Atlantic Craton	[9713] Marshall and Schoenwandt, 1999
B-2	362698	46.6095	14.271	12.1338	7.88745	16.8371	0.157749	1.31457	0.168266	0.578413	0.0420664	5.67	100	76.3807	183.67	25	3470.48	192	1690	85	638	2.3	72	33	34		1.8		4	6		3											11		0.43359	North Atlantic Craton	[9713] Marshall and Schoenwandt, 1999
ADK	17BW10-4	48.78	3.84468	12.3514	13.3101	21.171	0.010091	0.010091	0.204848	0.316858	0.0010091	0.74	100	79.9784	4.40594		1901.15	237																												North China Craton	Unpublished data
AUK	K-18	47.4287	5.19285	10.0944	5.74528	30.6951	0.0301326	0.472077	0.140619	0.19084	0.0100442		100	87.6338	43.8549		1145.04	106	12.29		1422	1.92	27.36	18.77	7.49	0.15	1.12	0.06	0.39	0.87		0.85	0.31	0.13	0.45	0.09	0.64	0.14	0.42	0.06	0.42	0.06		0.08	2.76707	North China Craton	Cheng et al., 2006
AUK	K-26	47.2939	4.79968	10.4328	6.0247	30.6456	0.0301235	0.421729	0.150618	0.190782	0.0100412		100	87.2542	43.8417		1144.69	103	10.16		1447	1.31	28.65	18.6	7.66	0.14	0.94	0.05	0.41	0.95		0.89	0.33	0.14	0.45	0.09	0.64	0.14	0.39	0.06	0.41	0.06		0.07	2.20908	North China Craton	Cheng et al., 2006
AUK	K-25	46.51	4.17797	11.6802	4.67008	32.2085	0.0301296	0.401727	0.150648	0.160691	0.0100432		100	86.5345	43.8505		964.146	94	9.53		1632	1.7	23.79	24.05	6.27	0.12	0.86	0.04	0.32	0.75		0.73	0.25	0.11	0.36	0.07	0.49	0.11	0.31	0.06	0.32	0.05		0.06	2.5895	North China Craton	Cheng et al., 2006
AUK	K-28	47.5999	4.75999	10.3535	6.13577	30.3575	0.0301265	0.421771	0.150633	0.180759	0.0100422		100	87.2339	43.8461		1084.56	104	10.91		1432	1.83	31.52	19.2	7.65	0.15	0.96	0.05	0.38	0.94		0.9	0.32	0.15	0.45	0.09	0.63	0.14	0.4	0.06	0.4	0.06		0.08	2.43419	North China Craton	Cheng et al., 2006
AUK	K-31	46.1867	5.53843	10.182	5.29979	32.0374	0.02983	0.38779	0.14915	0.17898	0.00994332		100	87.9993	43.4145		1073.88	103	9.82		1458	1.34	21.55	12.27	5.84	0.12	0.75	0.04	0.29	0.71		0.66	0.26	0.1	0.35	0.07	0.49	0.12	0.32	0.05	0.34	0.05		0.05	2.4919	North China Craton	Cheng et al., 2006
AUK	K-20	46.6653	5.39373	10.0342	5.28325	31.8702	0.050221	0.371635	0.150663	0.170751	0.0100442		100	88.0982	43.8549		1024.51	104	10.9		1481	5.42	27.31	17.4	6.34	0.14	0.95	0.05	0.3	0.75		0.73	0.29	0.11	0.39	0.08	0.59	0.14	0.39	0.06	0.38	0.06		0.06	3.05119	North China Craton	Cheng et al., 2006
AUK	K-15	46.9265	5.09241	10.5464	5.454	31.1571	0.0401768	0.451989	0.150663	0.170751	0.0100442		100	87.3176	43.8549		1024.51	103	14.39		1472	2.74	28.71	22.73	8.09	0.17	1.05	0.06	0.34	0.82		0.74	0.28	0.12	0.39	0.08	0.57	0.13	0.37	0.06	0.38	0.06		0.08	2.97562	North China Craton	Cheng et al., 2006
AUK	2004-29A*	46.6147	7.20072	10.8911	5.25053	29.543	0.010001	0.040004	0.170017	0.280028		7.7	100	86.3419			1680.17	11	3532	162	1766		68	3.4	10		0.38	0.02	0.58	1.25		1.16	0.41	0.11	0.62	0.12	0.81	0.18	0.53	0.08	0.53	0.08	4.8	0.05	0.631281	North China Craton	Polat et al., 2006
AUK	KM33	45.62	3.23	10.14	4.66	35.85	0.24		0.15	0.11		10.52	100	89.1769			660	65	1605	99	1871	0.24	14.4	10	4.42		0.1	0.01	0.2	0.51	0.09	0.47	0.19	0.09	0.33	0.07	0.46	0.11	0.35	0.05	0.34	0.05	2.73	0.02	0.481767	North China Craton	Polat et al., 2006
AUK	KM16A	45.97	5.12	10.19	6.38	31.49	0.47	0.03	0.15	0.2		7.22	100	87.8077		20	1200	94	1892	91	1447	0.57	17.9	2	8.58		0.19	0.02	0.33	0.9	0.16	0.83	0.34	0.15	0.55	0.1	0.73	0.16	0.47	0.07	0.49	0.07	3.65	0.03	0.554762	North China Craton	Polat et al., 2006
AUK	2004-34A	48.3345	8.18245	10.143	9.38281	22.8268	0.50015	0.10003	0.180054	0.350105		4.38	100	83.9866			2100.63	16.7	2066	111	973	0.07	122	9.1	8.1		0.68	0.04	1.07	2.51	0.38	1.83	0.61	0.24	0.9	0.16	1.16	0.25	0.71	0.1	0.7	0.11	6.5	0.11	0.61234	North China Craton	Polat et al., 2006
AUK	KM3B	46.2946	5.40054	9.64096	6.55066	31.2031	0.50005	0.030003	0.140014	0.240024		7.15	100	88.2941		33	1440.14	111	2050	89	1461	0.77	19.4	15	8.57		0.23	0.02	0.36	0.98	0.17	0.92	0.36	0.16	0.59	0.11	0.78	0.17	0.52	0.08	0.51	0.08	3.89	0.05	0.615591	North China Craton	Polat et al., 2006
AUK	KM3A	45.8846	5.17052	10.111	6.19062	31.7932	0.470047	0.030003	0.140014	0.210021		7.14	100	87.9924		13	1260.13	110	1688	75	1493	0.89	18.4	4	8.57		0.22	0.02	0.35	0.94	0.16	0.85	0.34	0.15	0.55	0.1	0.73	0.16	0.49	0.07	0.5	0.07	3.73	0.05	0.60565	North China Craton	Polat et al., 2006
AUK	KM7A	45.9546	4.94049	10.331	6.25063	31.6732	0.480048	0.020002	0.150015	0.20002		7.33	100	87.7224		20	1200.12	125	3058	102	1618	0.62	20.1	3	7.51		0.22	0.02	0.35	0.97	0.17	0.92	0.38	0.14	0.57	0.11	0.76	0.17	0.53	0.07	0.52	0.08	4.34	0.05	0.60565	North China Craton	Polat et al., 2006
AUK	2004-10	45.159	2.75055	9.05181	2.16043	40.5781	0.010002	0.040008	0.15003	0.10002		10.86	100	91.2643			600.12	77	4484	109	2737	0.71	8.8	3	2.44		0.12	0.01	0.22	0.53	0.08	0.43	0.17	0.07	0.3	0.06	0.42	0.09	0.28	0.04	0.27	0.04	2.41	0.04	0.525564	North China Craton	Polat et al., 2006
AUK	KM37	45.5846	3.36034	9.90099	4.63046	36.0236	0.240024		0.140014	0.120012		10.57	100	89.4506			720.072	81	2361	104	2040	0.26	15	7	4.11		0.11	0.01	0.21	0.55	0.09	0.49	0.22	0.1	0.36	0.07	0.51	0.12	0.38	0.06	0.36	0.05	3.16	0.02	0.504708	North China Craton	Polat et al., 2006
AUK	KM40	45.2555	5.07949	10.6589	5.57944	32.6667	0.379962	0.019998	0.159984	0.19998		8.32	100	87.7185		10	1199.88	127	3120	107	1700	0.6	24.8	3	8.67		0.24	0.02	0.3	0.82	0.14	0.81	0.32	0.12	0.5	0.1	0.69	0.15	0.52	0.07	0.51	0.07	4.04	0.04	0.770827	North China Craton	Polat et al., 2006
AUK	2004-12B	45.139	3.59072	11.2422	3.63073	35.9472	0.120024	0.05001	0.160032	0.120024		8.52	100	88.1682			720.144	100	5038	117	2366	0.82	12.6	31	5.43		0.16	0.01	0.27	0.66	0.1	0.54	0.22	0.1	0.45	0.1	0.71	0.17	0.51	0.07	0.45	0.06	4.73	0.04	0.570983	North China Craton	Polat et al., 2006
AUK	KM38	46.44	4.97	9.79	6.62	31.34	0.47	0.02	0.15	0.2		7.34	100	88.1803		8	1200	98	1583	88	1426	0.61	18.2	1	7.51		0.2	0.02	0.34	0.95	0.16	0.89	0.35	0.14	0.54	0.1	0.73	0.16	0.51	0.07	0.49	0.07	3.85	0.05	0.566785	North China Craton	Polat et al., 2006
AUK	2004-12A	47.8048	3.40034	10.8411	6.12061	31.1531	0.270027	0.080008	0.190019	0.140014		7.94	100	87.0079			840.084	98	4534	103	1999	0.61	20.4	20	5.4		0.22	0.01	0.25	0.68	0.11	0.6	0.24	0.13	0.43	0.08	0.59	0.13	0.39	0.06	0.36	0.05	3.48	0.02	0.84791	North China Craton	Polat et al., 2006
AUK	2004-14B	47.8296	4.97099	9.33187	6.27125	30.9762	0.210042	0.060012	0.160032	0.190038		7.35	100	88.5529			1140.23	142	5597	92	1835	1.63	24.2	5	6.17		0.27	0.02	0.3	0.87	0.15	0.81	0.31	0.13	0.58	0.11	0.76	0.17	0.5	0.07	0.5	0.08	4.47	0.04	0.867181	North China Craton	Polat et al., 2006
AUK	KM4	46.5853	5.69943	9.16908	6.92931	30.6969	0.519948	0.029997	0.129987	0.239976		6.96	100	88.6392		13	1439.86	113	1747	81	1334	0.9	20.1	2	9.63		0.24	0.02	0.37	1.03	0.17	0.94	0.38	0.15	0.61	0.12	0.79	0.18	0.54	0.08	0.53	0.08	4.04	0.04	0.624995	North China Craton	Polat et al., 2006
AUK	2004-09A	45.6346	3.90039	10.071	3.0203	36.7937	0.190019	0.120012	0.150015	0.120012		9.7	100	89.4895			720.072	91	4738	107	2325	3.03	22	13	2.89		0.37	0.02	0.92	1.98	0.25	1.05	0.3	0.12	0.42	0.07	0.54	0.12	0.32	0.05	0.33	0.05	2.94	0.28	0.387508	North China Craton	Polat et al., 2006
AUK	04-15A	46.9194	4.66093	10.4621	5.85117	31.4563	0.240048	0.060012	0.170034	0.180036		7.76	100	87.5111			1080.22	155	5589	102	1799	0.72	23.5	16	5.66		0.25	0.01	0.33	0.89	0.14	0.74	0.29	0.12	0.51	0.1	0.69	0.15	0.44	0.06	0.45	0.07	4.01	0.05	0.72995	North China Craton	Polat et al., 2006
AUK	KM5	46.06	4.9	10.12	6.47	31.61	0.46	0.02	0.16	0.2		7.39	100	87.9218		19	1200	92	1818	90	1441	0.49	17.4	2	8.59		0.19	0.02	0.32	0.91	0.15	0.84	0.32	0.15	0.54	0.1	0.68	0.15	0.47	0.07	0.47	0.07	3.6	0.04	0.572099	North China Craton	Polat et al., 2006
AUK	2004-09B	45.4291	3.53071	9.89198	3.07061	37.7375	0.020004	0.060012	0.15003	0.110022		10.37	100	89.8896			660.132	88	4600	108	2427	0.72	10.4	3	2.79		0.18	0.01	0.3	0.72	0.1	0.51	0.19	0.09	0.32	0.06	0.46	0.1	0.28	0.04	0.3	0.05	2.62	0.11	0.578121	North China Craton	Polat et al., 2006
AUK	KM2A	45.44	5.55	9.93	5.83	32.45	0.41	0.02	0.14	0.23		6.96	100	88.3934		25	1380	132	2110	85	1716	0.93	18.6	3	8.56		0.26	0.02	0.36	1.01	0.16	0.9	0.35	0.14	0.53	0.11	0.75	0.17	0.52	0.08	0.52	0.08	4.29		0.695886	North China Craton	Polat et al., 2006
AUK	2004-14A	45.8892	4.28086	10.042	4.06081	35.217	0.15003	0.070014	0.15003	0.140028		8.75	100	89.0984			840.168	108	5022	106	2131	1.68	21.6	19	4.89		0.25	0.02	0.66	1.53	0.2	0.93	0.3	0.11	0.48	0.08	0.62	0.13	0.38	0.06	0.37	0.06	3.46	0.15	0.364975	North China Craton	Polat et al., 2006
AUK	2004-31B	47.9596	8.86177	10.3021	8.67173	23.4647	0.180036	0.080016	0.170034	0.310062		5.32	100	84.1474			1860.37	14.7	2812	112	1085	0.08	106	3.9	9.2		0.38	0.02	0.52	1.41	0.21	1.03	0.38	0.16	0.58	0.12	0.83	0.2	0.57	0.09	0.59	0.09	5	0.14	0.704121	North China Craton	Polat et al., 2006
AUK	2004-28*	48.7898	7.07141	10.2921	8.32166	25.025	0.05001	0.05001	0.15003	0.25005		5.15	100	84.9998			1500.3	11.6	3092	130	1546	0.01	61	2.1	8.3		0.22	0.01	0.84	2.73	0.46	2.44	0.78	0.25	1.09	0.19	1.34	0.3	0.86	0.13	0.83	0.13	7.7	0.06	0.252354	North China Craton	Polat et al., 2006
AUK	2004-15B	45.8938	4.79144	11.0033	5.27158	32.3597	0.260078	0.080024	0.170051	0.170051		8.23	100	87.2673			1020.31	150	5748	106	1830	0.71	21.8	77	4.6		0.24	0.01	0.29	0.82	0.12	0.69	0.27	0.12	0.47	0.09	0.62	0.14	0.42	0.06	0.42	0.07	3.71	0.04	0.797408	North China Craton	Polat et al., 2006
AUK	2004-11A	47.6095	4.97099	9.93199	6.18124	30.5961	0.30006	0.060012	0.160032	0.190038		6.84	100	87.7739			1140.23	142	5764	96	1720	0.69	18.2	10	5.61		0.27	0.02	0.37	1.05	0.15	0.82	0.32	0.14	0.53	0.1	0.73	0.16	0.47	0.07	0.46	0.07	4.12	0.04	0.70312	North China Craton	Polat et al., 2006
AUK	6LB01-5	48.3694	7.46356	12.0116	7.58768	24.1032	0.0105003	0.0105003	0.175245	0.257897	0.0105003	4.37783	100	82.3836	40.9057	26.042	1365.86	150.298																												North China Craton	Unpublished data
AUK	6LB01-3	48.9214	6.81979	11.6169	6.37264	25.8227	0.0105917	0.0105917	0.174056	0.240765	0.0105917	5.18859	100	83.8197	47.2879	24.957	1358.94	139.015																												North China Craton	Unpublished data
AUK	6LB01-6	48.8639	7.70784	10.9983	6.55861	25.4526	0.0106048	0.0106048	0.14598	0.240933	0.0106048	5.31663	100	84.3587	48.9978	23.453	1327.89	140.625																												North China Craton	Unpublished data
AUK	6LB01-2	47.5026	8.32837	11.5895	6.47108	25.6134	0.0106059	0.0106059	0.152595	0.310588	0.0106059	5.35838	100	83.7412	56.4807	28.418	1477.83	165.766																												North China Craton	Unpublished data
AUK	6LB01-8	50.0865	6.79246	11.4192	4.13226	27.1441	0.010626	0.010626	0.170168	0.223426	0.010626	5.47834	100	84.7089	54.4823	20.924	1151.52	136.957																												North China Craton	Unpublished data
AUK	13LB30-6	46.4862	10.0018	13.9014	8.23929	19.2322	0.394985	1.03107	0.171331	0.505786	0.0359077	2.21	100	76.3267	156.78	31.62	3034.72	192.08																												North China Craton	Unpublished data
AUK	18LBB03-3a	45.7366	6.58506	17.4335	3.01815	25.7809	0.823132	0.200507	0.166737	0.251161	0.00422119	5	100	77.5098	18.4305	17.3	1506.96	81.9																												North China Craton	Unpublished data
AUK	16SD162-2	46.1162	4.90389	10.1493	5.39838	33.0644	0.0121041	0.00753482	0.136241	0.210477	0.00147212	6.32798	100	88.3617	6.42758	25.76	1262.86	130.04																												North China Craton	Unpublished data
AUK	17BW03-6	50.2747	7.66439	11.7095	6.86348	19.6273	3.10225	0.111519	0.205803	0.354833	0.0861737	1.05	100	79.6183	376.251		2129	114																												North China Craton	Unpublished data
AUK	19LN01-5b	50.8588	4.84271	10.5883	14.2409	18.6527	0.33858	0.02052	0.247266	0.206226	0.004104	2.4	100	80.4132	17.9189	52.5	1237.35	125.7																												North China Craton	Unpublished data
B-1	DF07-03	49.595	14.6415	14.0414	10.391	7.10071	0.440044	2.40024	0.190019	1.11011	0.090009	0.6	100	54.0975	392.997	44.4	6660.67	332	134	65.5	74.5	11.7	321	35	60.9	1.65	2.59	0.25	3.2	8.4	1.4	7.22	2.36	0.82	3.11	0.59	3.93	0.93	2.56	0.38	2.56	0.4	26.1	0.24	0.779861	North China Craton	Di et al., 2011
B-1	17SD42-3	49.96	14.7471	14.1172	10.058	7.69846	0.109978	2.18956	0.219956	0.859828	0.039992	1.11	100	55.9642	174.648		5160	332	176	59	111	1.07	76	36	49	1.45	2.6	0.13	2.35	6.04	1.07	5.38	1.92	0.75	2.79	0.54	3.64	0.8	2.3	0.35	2.23	0.34	19.8	0.23	1.06604	North China Craton	Gao et al., 2019
B-1	17SD38-5	51.2703	14.5529	12.1924	12.3225	7.57151	0.190038	0.960192	0.190038	0.710142	0.040008	1.99	100	59.1377	174.648		4260	279	343	54	111	4.51	208	30	37	1.13	2.11	0.15	2.16	5.6	0.92	4.59	1.58	0.63	2.2	0.42	2.8	0.62	1.79	0.27	1.75	0.27	15.7	0.17	0.94123	North China Craton	Gao et al., 2019
B-1	17SD42-5	49.28	15.14	13.13	10.53	8.2	0.17	2.17	0.17	1.13	0.08	1.32	100	59.2743	349.296		6780	336	346	45	185	3.13	164	58	67	1.97	2.71	0.17	3.17	8.81	1.47	7.68	2.54	0.92	3.56	0.67	4.35	0.95	2.69	0.41	2.67	0.41	24	0.25	0.823715	North China Craton	Gao et al., 2019
B-1	17SD42-4	49.635	14.7185	12.9287	10.319	8.54915	0.159984	2.26977	0.179982	1.14989	0.089991	1.79	100	60.6462	392.958		6900	333	310	45	189	3.03	124	43	69	2.03	2.92	0.16	3.06	8.78	1.46	7.57	2.59	0.93	3.63	0.68	4.44	0.97	2.78	0.42	2.68	0.41	24	0.24	0.919451	North China Craton	Gao et al., 2019
B-1	17SD61-3	52.1548	11.9388	12.3388	10.9289	9.38906	0.669933	1.9998	0.219978	0.339966	0.019998	0.67	100	63.9428	87.3152		2039.8		595	58	150	16.6	179	128	18.8	0.59	0.8	0.04	0.83	1.96		2.09	0.81	0.4	1.28	0.26	1.88	0.43	1.33	0.21	1.38	0.21	11.1	0.14	0.928708	North China Craton	Gao et al., 2020
B-1	16SD69-1	49.505	14.3086	14.1986	10.359	7.76922	0.669933	2.07979	0.189981	0.829917	0.089991	0.77	100	56.048	392.918		4979.5		175	58	156	38	156	90	31	1.12	2.34	0.18	2.74	7.51	1.29	6.73	2.34	0.85	3.03	0.61	4.22	0.89	2.82	0.41	2.74	0.41	23	0.61	0.822872	North China Craton	Gao et al., 2020
B-1	17SD49-10	52.7947	14.1186	12.4488	10.399	6.9693	0.139986	2.11979	0.189981	0.759924	0.059994	0.64	100	56.6105	261.946		4559.54		114	51	73	5.7	115	46	45	1.32	1.95	0.13	2.52	7.08	1.14	6.69	1.85	0.69	2.55	0.47	3.29	0.72	2.15	0.32	2.09	0.33	18.1	0.19	0.745592	North China Craton	Gao et al., 2020
B-1	16SD67-3	49.2349	15.9816	14.3314	11.8012	5.71057	1.09011	0.720072	0.20002	0.850085	0.080008	1.1	100	48.1495	349.331		5100.51		336	78	194	39	87	121	32	0.8	2.29	0.2	2.89	8.48	1.39	7.56	2.61	0.92	3.4	0.67	4.56	0.95	2.94	0.42	2.74	0.4	24	0.14	0.763493	North China Craton	Gao et al., 2020
B-1	15DL08-1	53.0826	13.854	11.3741	10.7881	6.61309	0.575506	2.12414	0.219739	1.26507	0.103591	1	100	57.537	452.299	48.4035	7590.41	335.259	76.5567	52.4117	37.6559	8.40179	182.44	89.7481	76.1063	2.40459	4.23128	0.376348	5.17563	14.2494	1.96656	9.81407	2.81458	1.08004	3.56207	0.665052	4.27129	0.930976	2.60408	0.398377	2.49263	0.392451	24.0121	0.596967	0.787727	North China Craton	Gao et al., 2020
B-1	15DL07-1	50.0952	14.8748	11.4124	11.3287	7.44785	1.08789	2.33268	0.216532	1.12659	0.0774075	0.94	100	60.3318	337.976	48.9787	6759.56	355.971	275.913	58.3323	111.678	11.6697	139.521	157.235	56.3625	1.99264	4.82601	0.760462	5.02427	16.0101		9.81105	2.62052	0.972258	3.41797	0.655111	4.24929	0.922433	2.56115	0.397048	2.4472	0.373254	23.8443	0.341271	0.925512	North China Craton	Gao et al., 2020
B-1	15YK31-1	50.2418	15.5907	9.78839	9.34952	11.0358	2.37499	0.769793	0.205039	0.608061	0.0358897	2.0384	100	72.4327	156.702	33.6	3648.37	213	494	63.2	300	189	113	188	31.2	0.92	2.67	0.44	2.01	4.96	0.77	4.07	1.21	0.58	1.71	0.32	2.13	0.47	1.35	0.22	1.45	0.23	12.6	0.26	1.27992	North China Craton	Guo et al., 2015
B-1	11JD67-1	47.5412	13.9863	16.7059	10.0501	7.23852	0.378284	2.10612	0.296493	1.58471	0.112463	2.07	100	50.2435	491.035	55.4	9508.23	362	93	43	83	5.83	171	77.4	59	2.03	3.95	0.42	3.7	10.3	1.76	9.97	3.23	1.15	4.32	0.8	5.46	1.19	3.5	0.53	3.65	0.55	28.9	0.01	1.02864	North China Craton	Guo et al., 2015
B-1	15YK29-1	49.8378	15.3286	13.1776	8.4974	8.86827	1.19393	1.66805	0.250818	1.08866	0.088935	1.5497	100	61.065	388.308	33.2	6531.94	282	72.3	73.4	186	64.9	121	248	59.1	1.7	4.27	0.61	3.04	8.29	1.31	6.92	2.05	0.94	2.83	0.53	3.39	0.75	2.16	0.35	2.26	0.35	20.3	0.42	1.35339	North China Craton	Guo et al., 2015
B-1	14JN11-2	49.5662	13.2768	15.5266	11.3801	5.90194	1.03914	1.3519	0.221953	1.59403	0.141243	0.76	100	46.9739	616.695	44	9564.16	400	76	51	51	13.5	242	249	93	2.68	6.33	0.46	7.41	19	2.9	14.2	3.76	1.33	4.43	0.8	4.91	1.04	2.92	0.46	2.94	0.45	25	0.68	0.8231	North China Craton	Guo et al., 2016
B-1	14JN11-4	49.1363	13.6175	13.6175	12.577	7.33407	0.626326	1.62643	0.191939	1.18194	0.0909183	0.89	100	55.6571	396.967	38	7091.63	333	168	43	66	4.16	282	76	62	1.8	3.74	0.62	4.62	12.3	1.91	9.65	2.69	0.95	3.18	0.59	3.65	0.78	2.19	0.35	2.21	0.34	17.5	0.35	0.780004	North China Craton	Guo et al., 2016
B-1	14JN12-1	49.5412	13.0483	19.4615	7.77453	6.10064	0.806696	0.968035	0.221841	1.9159	0.161339	0.73	100	42.2147	704.438	46	11495.4	383	88	48	48	17.4	82	201	114	3.25	9.07	0.57	9.62	24	3.46	16.6	4.3	2.38	5.05	0.92	5.69	1.22	3.42	0.55	3.38	0.5	30	1.03	0.908447	North China Craton	Guo et al., 2016
B-1	TH05-4	46.5516	14.9416	14.8119	12.6859	6.83701	0.858369	2.12596	0.209602	0.908274	0.0698673	0.5	100	51.8243	305.054	39.6	5449.65	266	184	53.2	119	3.37	120	100	48.4	1.41	2.31	0.16	2.98	8.41	1.34	6.44	2.09	0.76	2.72	0.55	3.43	0.74	2.08	0.31	2.07	0.31	19.4	0.16	0.746901	North China Craton	Huang et al., 2010
B-1	JN0740	48.4648	12.7313	17.0117	10.431	6.92069	0.580058	2.23022	0.190019	1.37014	0.070007	0.57	100	48.6677	305.664		8220.82		60.4	63.6	46.9	9.47	94	90.5	37.1	1.27	2.51	0.13	3.24	7.2	1.12	5.34	1.61	0.7	2.18	0.41	2.69	0.63	1.76	0.28	1.79	0.27	16.5	0.18	0.746442	North China Craton	Jiang et al., 2010
B-1	LQL2	49.0452	12.9316	16.8299	10.0821	6.17394	0.672801	2.32512	0.227565	1.58306	0.128624	0.6	100	46.0895	561.597	44.5	9498.37	344	75.4	57.6	56.6	21.6	189	130	97.3	2.99	9.5	1.18	9.04	20.3	2.89	14.3	3.85	1.53	4.42	0.82	5.19	1.01	3	0.45	3.09	0.48	27.6	0.95	1.01256	North China Craton	Li and Wei, 2017
B-1	LQL1	48.9513	13.1381	16.2545	10.7143	6.54927	0.366047	2.20617	0.237436	1.47408	0.108825	0.57	100	48.4272	475.15	44.1	8844.48	343	90.7	55.6	59.9	8.75	181	121	86.9	2.82	6.18	0.48	7.73	17.3	2.44	12.2	3.34	1.3	3.71	0.74	4.4	0.93	2.75	0.38	2.52	0.4	23.8	0.8	0.770329	North China Craton	Li and Wei, 2017
B-1	XHG05	48.3468	14.5867	13.5081	11.9254	7.80242	0.191532	2.31855	0.181452	1.06855	0.0705645	1	100	57.3765	308.099	35.03	6411.29	304.29	131.91	36.89	126.09	2.91	183.52	72.88	54.52	1.73	2.13	0.13	2.27	6.63	1.19	6.69	2.27	0.86	3.1	0.55	3.63	0.75	2.04	0.3	1.89	0.28	17.92	0.23	0.904109	North China Craton	Lv et al., 2012
B-1	XHG03	50.9257	14.188	12.6786	10.0121	7.45623	0.241497	3.15959	0.181123	1.07668	0.0804991	0.7	100	57.8158	351.475	35.33	6460.05	317.45	123.74	51.14	126.37	2.4	128.34	47.91	57.31	1.8	2.23	0.13	2.08	6.58	1.18	6.78	2.36	0.9	3.13	0.56	3.67	0.74	2.04	0.3	1.88	0.28	17.88	0.02	1.03302	North China Craton	Lv et al., 2012
B-1	XHG04	47.6392	14.8569	13.5345	12.1603	7.28381	0.227296	2.96518	0.18597	1.07449	0.0723215	3.46	100	55.6384	315.77	33.22	6446.95	301.84	123.85	50.17	121.26	2.35	188.42	42.87	55.15	1.7	2.17	0.12	2.17	6.71	1.17	6.65	2.29	0.87	3.03	0.54	3.49	0.73	2.05	0.3	1.88	0.29	17.37	0.24	0.963534	North China Craton	Lv et al., 2012
B-1	XHG01	47.7863	14.8639	13.7648	12.3986	6.57422	0.256805	2.97894	0.195172	1.09913	0.0821777	2.4	100	52.6756	358.804	34.55	6594.76	303.06	123.73	51.29	130.26	1.61	197.99	72.72	55.83	1.77	2.16	0.12	2.16	6.77	1.18	6.75	2.31	0.87	3.03	0.55	3.58	0.72	1.99	0.3	1.84	0.27	17.67	0.03	0.963534	North China Craton	Lv et al., 2012
B-1	XHG02	48.5836	14.6196	13.5573	11.6957	7.08215	0.15176	2.94415	0.19223	1.09268	0.0809389	1	100	54.9027	353.395	35.36	6556.05	310.69	124.38	51.74	127.96	1.75	150.5	41.15	57.18	1.76	2.16	0.12	2.14	6.86	1.18	6.81	2.32	0.87	2.98	0.55	3.58	0.73	2.04	0.3	1.88	0.29	18.06		0.972539	North China Craton	Lv et al., 2012
B-1	P10PJT1	49.0274	14.5432	14.8284	8.94185	7.30217	1.19157	2.65811	0.203687	1.18138	0.122212	2.72	100	53.4373	533.602	40.4	7088.3	306	219	45.2	86.2	42.4	336	201	70.1	2.16	4.29	0.29	5.43	12.8	2.08	9.79	2.97	1.09	3.73	0.69	4.6	0.97	2.78	0.41	2.79	0.43	24.5	0.44	0.761245	North China Craton	Peng et al., 2015
B-1	P10PJT3	49.7789	14.7065	14.5255	8.36349	7.35826	1.10575	2.64375	0.201045	1.20627	0.110575	1.64	100	54.1405	482.792	41.6	7237.64	308	216	44.4	83.6	61	35.3	147	73.4	2.23	4.38	0.3	4.97	12.5	2.02	9.97	2.99	1.02	3.64	0.71	4.59	0.99	2.83	0.43	2.83	0.43	24.4	0.41	0.849151	North China Craton	Peng et al., 2015
B-1	P10PJT2	48.9441	14.5398	14.9338	8.90169	7.52753	1.05082	2.54623	0.202081	1.2428	0.111145	1.9	100	54.0169	485.28	43.1	7456.81	320	219	45.3	83.8	35.8	348	114	72.6	2.22	4.38	0.3	5.07	12.8	2.04	10.2	3.07	1.02	3.72	0.69	4.7	1.01	2.85	0.43	2.88	0.45	24.9	0.47	0.832402	North China Craton	Peng et al., 2015
B-1	P10NC5	48.4141	13.9637	15.3002	10.6423	6.79234	0.688211	2.80271	0.239378	1.05725	0.0997407	0.68	100	50.8502	435.487	41.3	6343.51	316	126	51.6	89.1	5.81	118	54	55.6	1.82	3.37	0.22	4.02	10.4	1.69	8.42	2.77	0.94	3.51	0.7	4.66	1	2.77	0.42	2.7	0.42	24.1	0.43	0.807739	North China Craton	Peng et al., 2015
B-1	P10NC6	48.9305	14.1777	14.4861	10.7949	6.63616	0.706397	2.88529	0.228833	1.05462	0.0994926	0.48	100	51.635	434.404	39.3	6327.73	314	130	50.7	89.1	5.33	117	54	54.2	1.79	3.25	0.21	3.48	9.59	1.6	8.38	2.72	0.92	3.54	0.69	4.63	0.98	2.76	0.42	2.71	0.42	23.6	0.16	0.899852	North China Craton	Peng et al., 2015
B-1	Z2965-102	47.9048	12.9513	15.6416	12.4812	6.0206	1.05011	2.07021	0.250025	1.49015	0.140014	0.8	100	47.2861	611.329	44.8	8940.89	389	160	160	50.4	13.3	142	190	105	3.04	5.74	0.36	7.39	18.5	2.92	14.3	4.33	1.44	5.57	1.03	7.05	1.48	4.03	0.59	3.78	0.55	35.9	0.06	0.748402	North China Craton	Shan et al., 2015
B-1	Z2967-66	45.85	14.76	13.72	11.9	9.11	1.29	2.27	0.23	0.82	0.05	2.08	100	60.7449	218.31	47.6	4920	289	340	340	51.2	16.3	135	195	31.3	1.01	2.22	0.14	2.18	6.36	1.07	5.75	1.97	0.79	2.46	0.5	3.43	0.76	2.15	0.33	2.16	0.34	19	0.03	0.981214	North China Craton	Shan et al., 2015
B-1	2965-100	46.04	14.77	13.69	11.9	8.94	1.29	2.27	0.23	0.82	0.05	2.04	100	60.3472	218.31	45.3	4920	301	350	350	54.1	17.1	142	209	32.8	1.05	2.32	0.15	2.35	6.95	1.17	6.24	2.15	0.84	2.59	0.54	3.66	0.8	2.29	0.36	2.32	0.36	19.6	0.07	0.951234	North China Craton	Shan et al., 2015
B-1	Z2967-49	46.6147	14.9515	12.7713	12.0812	9.20092	1.22012	2.33023	0.20002	0.590059	0.040004	1.4	100	62.6724	174.665	50.8	3540.35	253	376	376	56	15.9	77.8	112	20.8	0.74	2.07	0.16	2.1	5.55	0.83	4.14	1.41	0.61	2.11	0.42	3.02	0.69	2.08	0.33	2.18	0.34	17.5	0.31	0.94977	North China Craton	Shan et al., 2015
B-1	03SD01	50.345	15.0315	11.9212	13.3813	6.71067	0.320032	1.47015	0.20002	0.570057	0.050005	2	100	56.7452	218.332		3420.34		113	113	41	16	127	66	28	1.2			2.23	4.88		4.15	1.59	0.63	2.26	0.44	3.03	0.67	1.92	0.32	1.92	0.31	16.47	1		North China Craton	Tang et al., 2007
B-1	17LSW32-4	49.4479	13.7935	16.7996	8.35378	6.41104	1.06339	2.20859	0.241309	1.54601	0.134969	2.1	100	47.0721	589.303		9276.07	393																												North China Craton	Unpublished data
B-1	18LDB09-1	52.2736	10.5278	10.9847	9.81716	12.2029	1.87815	1.67511	0.214211	0.385783	0.0406087	1.33	100	72.1368	177.306	43.1	2314.7	227																												North China Craton	Unpublished data
B-1	15YK48-5	53.0465	14.4798	11.8551	10.0343	7.24244	0.18437	1.6581	0.237577	1.19158	0.0701502	0.797287	100	58.7413	306.29	44.1	7149.46	333																												North China Craton	Unpublished data
B-1	18LBB18-4	51.9091	15.5958	11.6692	11.7898	4.44877	0.532246	2.67127	0.282191	1.03437	0.0672839	0.35	100	47.0473	293.775	60.1	6206.19	409																												North China Craton	Unpublished data
B-1	18LBB18-2	48.6168	14.5367	14.2647	11.031	6.42718	1.10813	2.71996	0.217597	1.02251	0.0554067	0.65	100	51.2205	241.917	50.5	6135.03	375																												North China Craton	Unpublished data
B-1	15YK50-2	50.9478	14.7782	10.6415	13.2518	6.92416	0.254617	2.0377	0.237942	0.875621	0.0506703	1.44012	100	60.2607	221.236	48.8	5253.72	346																												North China Craton	Unpublished data
B-1	13LB44-3	49.4823	13.9679	13.7386	10.007	8.33914	0.655615	2.72853	0.206079	0.825328	0.0494994	0.87	100	58.5849	216.124	46.419	4951.97	309.592																												North China Craton	Unpublished data
B-1	13LB48-1	50.97	13.0163	15.0289	9.38471	6.17102	1.27882	2.45367	0.233154	1.32726	0.136259	0.809	100	48.8995	594.934	48.292	7963.58	361.69																												North China Craton	Unpublished data
B-1	11JD040-1	50.4316	12.8973	16.015	9.27186	6.63146	0.781964	2.08185	0.243729	1.53346	0.111709	1.38	100	49.1096	487.744	46.6	9200.77	366																												North China Craton	Unpublished data
B-1	13LB40-5	50.5688	13.365	13.0554	9.11244	7.54883	2.80842	2.51695	0.194312	0.789394	0.0404817	1.01	100	57.4021	176.751	50.748	4736.36	323.446																												North China Craton	Unpublished data
B-1	13LB44-4	50.8254	13.7584	13.4032	9.5634	7.08427	0.765317	3.32791	0.181152	1.01567	0.0753104	1.61	100	55.1928	328.82	46.273	6094.04	340.939																												North China Craton	Unpublished data
B-1	17LSW32-3	49.8472	13.8276	16.7701	8.02494	6.38909	1.21403	2.00623	0.234575	1.56075	0.125518	2.68	100	47.0305	548.038		9364.49	388																												North China Craton	Unpublished data
B-1	C13-6	48.5151	14.7376	14.1884	12.144	7.32303	0.305126	1.63751	0.244101	0.834011	0.0711961	1.57	100	54.604	310.856		5004.07	311																												North China Craton	Unpublished data
B-1	18LBB18-6	49.1539	15.5101	13.4616	12.1901	5.92349	0.302734	2.30078	0.245214	0.851691	0.0605467	0.81	100	50.6292	264.359	50.7	5110.14	359																												North China Craton	Unpublished data
B-1	11JD067-1	47.5358	13.9877	16.7076	10.0511	7.23926	0.378323	2.10634	0.296524	1.58487	0.112474	2.07	100	50.2435	491.086	55.4	9509.2	456																												North China Craton	Unpublished data
B-1	JB6003-3	48.1287	14.4589	15.0072	11.2706	7.0873	0.385842	2.07136	0.222367	1.26312	0.104583	1.4	100	52.3946	456.632	51.69	7578.74																													North China Craton	Unpublished data
B-1	JF-5	50.9603	14.4904	13.0983	9.26735	8.20039	0.243878	2.55055	0.19307	0.934864	0.0609694	1.09	100	59.3339	266.204		5609.19	334																												North China Craton	Unpublished data
B-1	OFX010-1	49.9487	12.2411	12.9998	10.4162	7.09453	5.32089	0.943203	0.174287	0.809924	0.051261	2.31	100	55.983	223.816	45.6	4859.54	224																												North China Craton	Unpublished data
B-1	18LBB01-4	48.2773	15.0557	13.2482	11.3903	8.27005	0.656354	2.38307	0.196906	0.470555	0.0514985	0.88	100	59.2633	224.853	44	2823.33	230																												North China Craton	Unpublished data
B-1	15YK49-4	50.858	15.5072	10.1968	10.8083	8.55773	0.768213	2.13625	0.253604	0.866299	0.0475541	1.73314	100	66.1693	207.631	37.9	5197.79	241																												North China Craton	Unpublished data
B-1	19LN08-4	46.2437	15.156	13.7067	13.7169	8.45062	1.25535	0.0204121	0.405181	0.986926	0.0581745	1.94	100	58.963	254.002	50	5921.56	245																												North China Craton	Unpublished data
B-1	15YK31-3	52.3503	14.945	13.1678	9.03351	7.71241	0.708753	0.602524	0.256783	1.13916	0.0838028	2.61265	100	57.7163	365.9	41.9	6834.94	319																												North China Craton	Unpublished data
B-1	11JD011-1	52.6798	14.659	13.1571	4.68059	7.01574	3.7239	2.41745	0.113157	1.24473	0.30861	2.68	100	55.4107	1347.45	43.5	7468.37	358																												North China Craton	Unpublished data
B-1	WT2010-1	52.541	13.363	13.3934	9.20227	7.35979	0.253088	2.51063	0.293582	0.992104	0.0911116	2.22	100	56.1525	397.811		5952.62	352.1																												North China Craton	Unpublished data
B-1	12LN73-2	51.6344	15.1336	12.3453	11.8618	6.34395	0.323329	1.47069	0.202714	0.647672	0.0364886	1.23	100	54.4955	159.316	49.48	3886.03	286.88																												North China Craton	Unpublished data
B-1	17JD16-1	46.7311	14.7174	14.8585	11.2018	8.78412	0.0604412	2.23633	0.231691	1.11816	0.0604412	0.62	100	57.9436	263.898	41.36	6708.98	352.38																												North China Craton	Unpublished data
B-1	11JD006-3	47.7601	14.5741	13.7605	11.7517	7.955	0.532342	2.48092	0.200884	0.903978	0.0803536	0.3	100	57.3973	350.839	43.6	5423.87	294																												North China Craton	Unpublished data
B-1	OFX008-5	47.7063	15.8538	13.7517	12.654	6.61696	0.569535	1.62576	0.227814	0.942322	0.0517759	2.65	100	52.8608	226.064	43.4	5653.93	304																												North China Craton	Unpublished data
B-1	JF-4	51.2776	14.4228	11.4534	11.1605	8.36279	0.202	2.1008	0.2121	0.757499	0.0504999	1.51	100	62.9854	220.493		4545	289																												North China Craton	Unpublished data
B-1	WT2109-1	50.8102	12.4412	16.3722	10.413	5.90695	0.209096	2.00732	0.271824	1.38003	0.188186	5.2	100	45.6765	821.658		8280.19	437																												North China Craton	Unpublished data
B-1	11JD007-2	48.4956	14.3119	13.8443	10.6729	7.49136	0.803009	2.95792	0.193129	1.12828	0.101647	1.58	100	55.7732	443.809	41	6769.67	284																												North China Craton	Unpublished data
B-1	12FX10-2	53.4692	15.2725	9.65869	7.91645	7.98777	1.36526	2.59806	0.112073	1.34488	0.275089	1.63	100	65.8392	1201.09	49.9	8069.28	372																												North China Craton	Unpublished data
B-1	JB6049	49.6614	14.3303	13.967	10.4046	6.9532	0.474311	2.74495	0.208899	1.17064	0.0847706	0.79	100	53.708	370.125	42.14	7023.85																													North China Craton	Unpublished data
B-1	12LN48-2	50.6221	13.1419	15.9493	8.05927	7.05021	0.710077	2.73039	0.214342	1.42785	0.0945304		100	50.7431	412.738	32.36	8567.09	306.6																												North China Craton	Unpublished data
B-1	11JD007-3	48.309	13.3657	16.049	9.90279	6.64237	0.63791	2.93641	0.212637	1.80235	0.141758	1.09	100	49.0977	618.942	47.2	10814.1	374																												North China Craton	Unpublished data
B-1	19LN08-29	48.6139	16.4374	14.6864	10.0203	5.71868	0.576929	2.66197	0.229759	0.972682	0.0819846	1.14	100	47.5744	357.961	44.6	5836.09	278																												North China Craton	Unpublished data
B-1	12LN77-1	49.9974	20.4575	8.80111	8.89935	6.91194	2.00583	2.4991	0.128946	0.297805	0.00102338	2.14	100	64.6675	4.4683	24.183	1786.83	195.406																												North China Craton	Unpublished data
B-1	19LN07-3	51.2643	17.5228	10.697	10.7072	4.92064	1.04933	3.18874	0.18134	0.358606	0.110027	1.79	100	51.7381	480.398	27.5	2151.63	102																												North China Craton	Unpublished data
B-1	12JD22-2	45.487	13.3299	19.6736	10.1173	5.61958	0.428353	2.67211	0.254972	2.21316	0.203978	1.76	100	39.9646	890.606	51.8	13278.9	432																												North China Craton	Unpublished data
B-1	12JD28-2	49.729	13.1021	16.8267	9.25569	5.65287	0.345059	2.79091	0.288225	1.83693	0.172529	1.37	100	43.9124	753.297	49.8	11021.6	398																												North China Craton	Unpublished data
B-1	11JD007-4	50.0605	12.8099	15.6622	10.9655	4.75711	0.403145	3.30579	0.231808	1.66297	0.141101	0.67	100	41.4468	616.073	43.8	9977.83	370																												North China Craton	Unpublished data
B-1	OFX008-4	47.5435	13.7321	13.1116	15.4308	7.09999	0.42722	1.56647	0.21361	0.834096	0.0406876	1.57	100	55.7909	177.65	51.4	5004.58	235																												North China Craton	Unpublished data
B-1	WT2121-2	50.9946	13.4303	16.0557	8.3712	5.80632	1.23195	2.17106	0.333232	1.39352	0.212057	1.49	100	45.7345	925.882		8361.1	103																												North China Craton	Unpublished data
B-1	19LN08-12	45.8254	11.0014	14.6106	17.1462	9.67221	0.500992	0.0204486	0.515306	0.631863	0.07566	2.15	100	60.6732	330.346	29.9	3791.18	150																												North China Craton	Unpublished data
B-1	OFX008-1	47.0743	15.821	13.9616	11.1461	8.53031	0.714361	1.67034	0.210106	0.829919	0.0420212	4.67	100	58.7442	183.473	50.4	4979.51	242																												North China Craton	Unpublished data
B-1	OFX008-2	46.9705	15.0492	13.7442	12.3666	8.48265	0.600725	1.58467	0.248576	0.901088	0.0517866	3.34	100	58.9885	226.111	53.6	5406.53	249																												North China Craton	Unpublished data
B-1	12FX18-3	47.7918	13.6938	14.1789	13.0773	6.29611	1.18242	2.4861	0.192016	1.05104	0.0505306	0.91	100	50.8564	220.626	43	6306.22	238																												North China Craton	Unpublished data
B-1	19LN08-7	48.88	14.5844	13.6175	14.4233	5.96269	0.251803	1.14822	0.23468	0.850087	0.0473389	0.65	100	50.5062	206.691	39.3	5100.52	247																												North China Craton	Unpublished data
B-1	15YK47-1	50.689	14.1605	11.6208	10.9289	7.85799	0.644751	2.15409	0.237653	1.585	0.121285	2.178	100	61.1784	529.556	45.9	9510.03	360																												North China Craton	Unpublished data
B-1	12FX18-2	49.1503	13.7154	14.4495	11.4832	6.00302	0.603318	3.08698	0.241327	1.18653	0.0804424	0.44	100	49.1922	351.228	46.5	7119.16	268																												North China Craton	Unpublished data
B-1	13LB15-2	48.6848	12.8146	16.5595	9.30801	6.08636	1.11039	3.06954	0.229176	1.95915	0.178474	1.25	100	46.137	779.251	52.939	11754.9	418.375																												North China Craton	Unpublished data
B-1	JF-7	48.239	13.5048	14.6932	10.7714	7.88678	0.162057	3.1331	0.237684	1.27485	0.0972342		100	55.5739	424.544		7649.09	351																												North China Craton	Unpublished data
B-1	18LBB03-4	49.4753	8.73691	15.1169	11.8456	12.0793	1.08703	0.772099	0.345413	0.474434	0.0670507	1.47	100	65.0619	292.757	50.5	2846.61																													North China Craton	Unpublished data
B-1	11JD006-4	47.3182	14.4335	14.2527	12.0129	8.75854	0.271193	1.84813	0.200884	0.843712	0.0602652	0.34	100	58.8838	263.13	46.5	5062.27	310																												North China Craton	Unpublished data
B-1	WS68	53.4497	15.0084	9.41313	11.159	8.1931	0.389146	1.22003	0.231384	0.830879	0.105175	2.28	100	66.9798	459.213		4985.28		159		115	13	194	159	34	1.34	2	0.18	2.1	6.06	0.97	5.06	1.71	0.7	2.4	0.49	3.03	0.66	1.94	0.31	2.18	0.37	15.48	0.19	0.917652	North China Craton	Wang et al., 2004
B-1	WS100	53.0273	14.8393	10.9423	9.55526	7.7609	0.396301	1.71731	0.253192	1.40907	0.0990753	4.18	100	62.3057	432.582		8454.43		109		84	11	306	46	43	1.49	3.26	0.22	3.98	11.68	1.84	9.14	2.9	1.01	4.07	0.78	4.97	1	2.84	0.47	2.84	0.42	25.37	0.32	0.789227	North China Craton	Wang et al., 2004
B-1	WS73	52.3851	16.3777	6.89135	12.4152	7.75277	0.23689	2.26123	0.290729	1.32443	0.0646064	1.62	100	72.3895	282.084		7946.59		303		205	5	119	23	34	1.46	1.32	0.11	1.29	5.47		6.06	2.31	0.93	2.89	0.53	3.11	0.63	1.81	0.27	1.54	0.22	13.77	0.05	0.985942	North China Craton	Wang et al., 2004
B-1	TS0964	51.2151	14.7215	12.6913	9.53095	7.05071	0.360036	2.9503	0.290029	1.11011	0.080008	1.48	100	56.4217	349.296		6660		186		108	21	212	95	61	1.71	2.66	0.17	3.33	8.22	1.45	7.56	2.61	0.82	3.51	0.65	4.43	0.89	2.74	0.39	2.59	0.38	26	0.31	0.76967	North China Craton	Wang et al., 2013
B-1	T1019-2	50.215	14.7185	14.7885	10.289	6.9993	0.209979	1.43986	0.209979	1.0299	0.09999	2.9	100	52.4491	436.62		6180		153			3	129	31	56	1.6	2.8	0.2	3.08	7.98	1.39	7.15	2.42	0.92	3.19	0.62	4.4	0.94	2.69	0.43	2.83	0.43	24	0.18	0.87594	North China Craton	Wang et al., 2013
B-1	T1019-4	49.79	14.58	13.87	10.88	7.08	0.1	2.36	0.21	1.03	0.1	1.9	100	54.3298	436.62		6180		160			2	107	22	56	1.6	2.9	0.2	3.07	8.02	1.34	6.88	2.31	0.85	3.07	0.58	3.96	0.87	2.54	0.4	2.65	0.39	23	0.12	0.910179	North China Craton	Wang et al., 2013
B-1	TS1056L1	51.17	15.59	13.68	7.58	6.4	0.45	3.78	0.21	1.07	0.07	2.74	100	52.1598	305.634		6420		238		132	19	172	57	59	1.93	2.38	0.2	2.89	7.9	1.33	6.99	2.37	0.91	3.48	0.64	4.23	0.88	2.55	0.39	2.54	0.4	22	0.21	0.793499	North China Craton	Wang et al., 2013
B-1	T1019-5	48.36	14.9	15.22	8.57	9.18	0.1	2.04	0.2	1.33	0.1	2.1	100	58.4312	436.62		7980		174			1	53	15	71	2	3.3	0.2	2.44	6.64	1.11	5.97	2.21	0.89	3.6	0.76	5.41	1.18	3.37	0.53	3.36	0.46	30	0.39	1.30314	North China Craton	Wang et al., 2013
B-1	T1019-3	50.94	14.22	13.26	11.15	6.96	0.2	2.05	0.2	0.92	0.1	2	100	55.0208	436.62		5520		152			3	107	29	54	1.5	2.7	0.2	3.32	8.77	1.42	7.25	2.31	0.88	3.1	0.58	3.93	0.85	2.44	0.4	2.57	0.38	22	0.16	0.783597	North China Craton	Wang et al., 2013
B-1	T1018	50.73	14.32	16.04	7.47	8.28	0.1	1.74	0.2	1.02	0.1	3	100	54.6079	436.62		6120		167			1	80	17	55	1.7	2.8	0.2	2.73	7.29	1.18	6.32	2.18	0.87	3.08	0.59	4.14	0.9	2.6	0.4	2.56	0.38	23	0.19	0.98824	North China Craton	Wang et al., 2013
B-1	T0826-4	51.2651	14.0114	12.8013	11.9812	6.90069	0.10001	1.73017	0.20002	0.910091	0.10001	2.1	100	55.6794	436.62		5460		205			1	113	19	63	1.5	2.2	0.4	2.79	7.47	1.15	5.93	2.12	0.6	2.93	0.54	3.56	0.8	2.29	0.34	2.21	0.33	16	0.27	0.759776	North China Craton	Wang et al., 2013
B-1	T0825-1	51.6648	13.7186	14.7085	9.38906	6.59934	0.09999	2.47975	0.209979	1.0299	0.09999	3.4	100	51.1154	436.62		6180		126			1	113	58	74	1.8	3.3	0.4	4.19	11.2	1.67	8.64	2.78	0.97	3.85	0.71	4.55	1.02	2.94	0.43	2.87	0.44	22	0.34	0.75887	North China Craton	Wang et al., 2013
B-1	12FX15-2	48.3344	12.9471	14.1427	12.5588	6.70345	1.3693	2.74882	0.194155	0.940119	0.0613121	2.02	100	52.4857	267.701	43.6	5640.71	266	139	38	97	19	376	247	45.7	1.3	5.1	0.64	3.1	8.2	1.24	5.59	1.85	0.84	2.24	0.45	2.82	0.62	1.77	0.25	1.62	0.25	18.1	0.85	1.58517	North China Craton	Wang et al., 2015
B-1	12FX18-4	52.6583	14.722	10.2374	13.8088	3.97727	0.101461	3.40909	0.142045	0.892857	0.0507305	1.32	100	47.5178	221.499	45.4	5357.14	211	79	27	61	1.33	1195	43.6	41.6	1.37	6.43	0.58	7.85	18.1	2.34	9.19	2.5	1.27	3.02	0.6	3.84	0.88	2.6	0.39	2.56	0.4	25.9	0.1	0.789239	North China Craton	Wang et al., 2015
B-1	12LN39-1	50.4839	14.2724	15.0881	6.76106	7.32559	2.46228	2.19482	0.179669	1.14028	0.0918761	1.9	100	53.0848	401.149	42.24	6841.71	294.4	47.32	37.48	36.98	145.38	158.22	359.8	57.302	1.722	2.634	0.278	3.056	8.616	1.408	8.04	2.742	0.902	3.458	0.662	4.456	0.962	2.92	0.422	2.884	0.432	22.74	0.786	0.830481	North China Craton	Wang et al., 2017
B-1	13LB31-5	48.2526	14.1084	13.6164	10.308	10.2462	0.562878	2.14117	0.187289	0.552755	0.0242969	1.1	100	63.685	106.085	29.66	3316.53	187.72		53.98	217.2	12.722	130.9	117.1	40.6	1.194	1.836	0.136	2.364	6.186	0.884	4.638	1.444	0.576	1.844	0.364	2.69	0.562	1.824	0.266	1.902	0.282	14.266	0.286	0.748329	North China Craton	Wang et al., 2017
B-1	TH13-16	48.0666	14.0769	14.0262	11.428	8.1295	0.730742	2.17193	0.223282	1.06567	0.0811935	1.02	100	57.4603	354.507	47.9	6393.99	326	232	64.1	91.6	10.2	116	66	31.9	1.16	2.31	0.16	2.39	7.09	1.23	6.78	2.3	0.87	2.88	0.58	3.89	0.86	2.41	0.36	2.3	0.36	21.4		0.931282	North China Craton	Wang et al., 2019
B-2	11XT88-2a	51.7452	16.2616	10.9411	9.09091	8.12081	1.20012	1.65017	0.160016	0.730073	0.10001	2.13	100	63.3668	436.663	30.7	4380.44	207	278	80.9	193	25.4	218	343	23.4		2.31	0.2	7.53	16.6	2.4	10.9	2.62	0.94	2.88	0.48	3.03	0.62	1.78	0.26	1.68	0.24	17.5	0.32	0.295586	North China Craton	Deng et al., 2013
B-2	11XT116-1	50.375	16.3916	11.9112	9.05091	7.27073	0.490049	3.0403	0.160016	1.07011	0.240024	1.75	100	58.7214	1047.99	33	6420.64	232	96.3	78.2	120	6.41	369	102	101		5.08	0.3	17.2	38.2	5.34	23.2	4.98	1.45	4.68	0.7	3.85	0.72	2.1	0.28	1.82	0.28	20.2	0.63	0.284579	North China Craton	Deng et al., 2013
B-2	11XT116-6	52.6853	15.9016	11.8812	7.9908	6.33063	0.670067	3.14031	0.170017	1.06011	0.170017	1.91	100	55.3921	742.328	32.9	6360.64	236	163	87.7	156	13.1	197	75.6	86.6		4.77	0.34	12	27.2	3.86	16.7	3.96	1.2	4.12	0.68	4.02	0.79	2.33	0.31	2.11	0.31	22.6	0.69	0.383005	North China Craton	Deng et al., 2013
B-2	11XT88-1b	51.3351	16.4316	10.8611	8.9709	7.9708	1.0301	2.39024	0.170017	0.730073	0.110011	2.01	100	63.104	480.33	31.8	4380.44	203	273	76.2	195	23.7	231	267	24.6		2.39	0.19	7.11	16.1	2.26	10.3	2.5	0.86	2.87	0.48	2.98	0.62	1.79	0.26	1.64	0.25	17.1	0.33	0.323888	North China Craton	Deng et al., 2013
B-2	11XT116-7	50.035	15.2915	11.7512	9.0209	9.31093	0.260026	2.91029	0.170017	1.05011	0.20002	1.9	100	64.8697	873.327	33	6300.63	235	214	76.5	153	1.89	349	52	88.9		4.87	0.3	16.2	37.8	5.39	23.2	4.82	1.43	4.47	0.68	4.17	0.82	2.24	0.32	2.04	0.31	22.5	0.57	0.289655	North China Craton	Deng et al., 2013
B-2	11XT88-2b	51.7052	16.4916	10.7711	9.08091	8.0208	1.05011	1.91019	0.160016	0.710071	0.10001	2.21	100	63.4427	436.663	31.8	4260.43	202	275	77.4	190	22.7	227	278	22.6		2.36	0.2	7.19	16.5	2.3	10.5	2.49	0.9	2.78	0.45	2.87	0.61	1.72	0.26	1.64	0.24	17	0.34	0.316264	North China Craton	Deng et al., 2013
B-2	11XT114-3	49.815	14.2514	14.7315	9.15092	6.83068	0.980098	2.43024	0.210021	1.40014	0.20002	1.97	100	51.9371	873.327	44.5	8400.84	319	169	84.3	76.5	18.5	202	205	77		4.45	0.36	7.36	17.7	2.57	12.1	3.41	1.19	4.1	0.74	4.63	0.97	2.86	0.41	2.77	0.42	27	0.6	0.582572	North China Craton	Deng et al., 2013
B-2	11XT88-1a	51.4851	16.3816	10.8711	10.021	8.06081	0.360036	1.83018	0.160016	0.730073	0.10001	1.62	100	63.3437	436.663	30.8	4380.44	204	277	90.8	189	2.57	271	159	29.2		2.39	0.23	6.69	15.8	2.22	9.84	2.44	0.82	2.75	0.46	3	0.61	1.75	0.26	1.76	0.23	16.9	0.31	0.344222	North China Craton	Deng et al., 2013
B-2	11XT87-1	49.59	15.59	14.47	9.47	6.15	0.64	2.21	0.21	1.44	0.23	1.84	100	49.7614	1004.23	33.8	8640	265	103	104	158	9.27	358	175	96		9.33	0.48	23.8	53.8	7.15	30.3	6.62	1.85	6.26	0.96	5.51	1.1	3.07	0.44	2.8	0.4	30.4	2.77	0.377722	North China Craton	Deng et al., 2013
B-2	11XT116-4	51.4051	15.5816	12.2412	8.92089	7.13071	0.460046	2.85029	0.170017	1.08011	0.160016	1.77	100	57.5832	698.661	32.7	6480.65	238	251	80.7	182	5.02	286	182	101		4.7	0.32	11.7	27.9	3.8	16.6	4.06	1.25	4.13	0.7	4.06	0.82	2.38	0.35	2.17	0.32	23	0.69	0.387061	North China Craton	Deng et al., 2013
B-2	DF07-11	49.12	15.96	11.76	9.64	8.61	1.31	2.64	0.19	0.71	0.06	1.7	100	63.0486	261.972	27.9	4260	200	140	63.3	149.8	46	198	211	35.7	0.98	1.54	0.18	2.8	5.8		5.17	1.65	0.61	2.09	0.39	2.6	0.59	1.66	0.25	1.67	0.26	16.1	0.16	0.529944	North China Craton	Di et al., 2011
B-2	DF07-02	48.97	16.16	12.62	12.23	5.99	0.39	2.33	0.2	1.02	0.09	0.6	100	52.5201	392.958	42.1	6120	308	262	66.9	135.9	16.2	121	51	55.8	1.56	2.54	0.24	3.8	8.5		7.41	2.31	0.85	3.04	0.56	3.71	0.85	2.35	0.34	2.27	0.36	24.4	0.24	0.644047	North China Craton	Di et al., 2011
B-2	09DF-11	46.84	14.71	15.02	9.99	8.96	1.08	1.98	0.21	1.09	0.12	1.5	100	58.163	523.944	40	6540	319	156	60.1	133.8	42.3	97	86	63	1.69	3.06	0.22	4.2	9.8	1.57	7.86	2.54	0.9	3.12	0.56	3.84	0.87	2.42	0.37	2.41	0.37	22.9	0.41	0.702004	North China Craton	Di et al., 2011
B-2	09DF-07	53.58	17.87	9.9	6.78	5.9	0.78	3.83	0.2	1.06	0.1	1.9	100	58.1394	436.62	47.1	6360	312	234	70.9	158	26.9	278	83	62.4	1.7	2.7	0.2	3.9	9.4	1.47	7.41	2.47	0.88	3.14	0.56	3.82	0.86	2.36	0.35	2.27	0.35	22.3	0.34	0.667062	North China Craton	Di et al., 2011
B-2	DF07-12	49.68	14.57	12.84	10.28	8.09	1.27	2.16	0.2	0.84	0.07	1.5	100	59.4873	305.634	43.1	5040	290	172	70.5	117	45.8	125	145	44.8	1.41	2.21	0.24	3.1	7.6	1.19	6.18	1.99	0.77	2.7	0.51	3.55	0.8	2.27	0.35	2.29	0.36	20	0.24	0.686907	North China Craton	Di et al., 2011
B-2	DF07-09	50.57	13.93	14.13	10.94	6.42	0.68	1.9	0.21	1.12	0.1	1.2	100	51.4296	436.62	49	6720	356	150	80.5	68	20.3	150	100	56.9	1.81	2.46	0.27	3.4	8.7	1.4	7.57	2.65	1	3.71	0.7	4.81	1.1	3.05	0.45	3.03	0.47	26.7	0.27	0.697145	North China Craton	Di et al., 2011
B-2	16SD46-6	49.02	15.11	14.4	10.06	6.13	1.07	2.73	0.22	1.16	0.1	0.8	100	49.8012	436.62	37	6960	302	227	50	78	33	150	77.29	83	2.28	3.69	0.2	7.99	15.1		11.5	3.28	1.09	4.27	0.78	5.02	1.08	3.16	0.47	3.06	0.47	29	0.74	0.444986	North China Craton	Gao et al., 2019
B-2	6LB16-7	49.2851	16.5383	11.7488	10.419	7.43926	0.989901	2.37976	0.19998	0.89991	0.09999	1.39	100	59.6066	436.62	48.9679	5400	280	424	41	73	46	124	46	50	1.51	2.39	0.15	5.16	10.2		7.32	2.17	0.77	2.83	0.52	3.5	0.76	2.28	0.34	2.27	0.35	19.6	0.52	0.446288	North China Craton	Gao et al., 2019
B-2	16SD46-3	49.4251	14.7185	14.2186	10.299	6.16938	1.21988	2.47975	0.19998	1.14989	0.119988	1.23	100	50.2783	523.891	38	6899.31	301	198	51	85	41	198	82.85	80	2.24	2.97	0.19	6.65	13.6		10.5	3.1	1.14	4.02	0.73	4.73	1.03	3	0.44	2.88	0.45	27	0.83	0.43033	North China Craton	Gao et al., 2019
B-2	6LB08-6	51.2051	14.1514	12.5013	10.9011	7.07071	0.530053	2.68027	0.190019	0.710071	0.060006	0.88	100	56.8618	261.972	41.2406	4260	282	255	47	102	7.67	466	259	34	1.13	1.44	0.1	3.45	7.32		5.93	1.94	0.8	2.66	0.49	3.31	0.72	2.14	0.32	2.08	0.31	19	0.37	0.402171	North China Craton	Gao et al., 2019
B-2	6LB16-3	48.23	15.5	11.75	14.92	7.68	0.35	0.79	0.2	0.54	0.04	1.68	100	60.3686	174.648	31.804	3240	208	330	52	125	11.8	185	61	32	0.96	0.52	0.04	3.43	6.91		4.86	1.43	0.57	1.92	0.35	2.36	0.51	1.5	0.22	1.44	0.22	12.8	0.24	0.146075	North China Craton	Gao et al., 2019
B-2	16SD46-4	49.0398	16.4833	12.6425	9.55191	7.0114	1.15023	2.89058	0.20004	0.940188	0.090018	1.1	100	56.3789	393.036	25	5641.13	264	218	49	96	18.9	300	124.18	63	1.8	2.37	0.18	6.51	13.2		7.85	2.59	1.05	3.31	0.61	3.93	0.87	2.54	0.38	2.45	0.38	21	0.61	0.35078	North China Craton	Gao et al., 2019
B-2	16SD46-2	49.4349	14.9815	13.7414	9.78098	6.68067	0.80008	3.23032	0.180018	1.08011	0.090009	0.95	100	53.1182	392.997	35	6480.65	290	180	52	91	31	173	51.82	73	2.03	2.68	0.18	5.73	12.3		8.33	2.84	1.01	3.8	0.69	4.45	0.98	2.88	0.42	2.75	0.43	26	0.63	0.450658	North China Craton	Gao et al., 2019
B-2	6LB08-7	51.2649	11.8588	13.3987	10.6289	9.28907	0.359964	2.21978	0.209979	0.709929	0.059994	0.65	100	61.7693	261.972	39.837	4260	252	433	56	188	4.94	289	119	29	1.14	1.9	0.1	3.91	8.58		7.13	2.07	0.69	2.58	0.44	2.83	0.59	1.68	0.25	1.59	0.24	14.7	0.76	0.468214	North China Craton	Gao et al., 2019
B-2	16SD46-1	49.92	14.6	13.41	9.84	6.76	1.05	3.05	0.18	1.1	0.09	0.63	100	54.0189	392.958	35	6600	278	173	49	81	42	170	78.15	78	2.18	2.77	0.18	5.52	12.3		8.71	2.99	1.02	3.94	0.72	4.63	1.02	3.02	0.44	2.88	0.45	27	0.6	0.483513	North China Craton	Gao et al., 2019
B-2	6LB14-4	48.9802	16.3667	10.3679	15.4369	6.13877	0.189962	1.56969	0.189962	0.719856	0.039992	0.37	100	57.9809	174.648	33.6612	4320	256	396	45	151	1.89	300	52	40	1.3	1.15	0.08	3.92	8.57		6.54	2	0.84	2.6	0.47	3.04	0.64	1.89	0.27	1.76	0.26	16.4	0.3	0.28267	North China Craton	Gao et al., 2019
B-2	6LB03-4	48.6349	15.1415	13.2913	10.8611	7.72077	0.630063	2.53025	0.160016	0.860086	0.170017	1.32	100	57.5148	742.254	37.3987	5160	215	463	53	142	5.53	291	166	64	1.54	1.55	0.12	3.79	8.01	1.27	6.53	1.82	0.97	2.38	0.42	2.67	0.57	1.64	0.25	1.59	0.25	14.4	0.19	0.394058	North China Craton	Gao et al., 2019
B-2	6LB16-8	47.7548	16.8617	10.7911	16.5117	6.67067	0.20002	0.460046	0.190019	0.520052	0.040004	1.49	100	59.027	174.648	32.874	3120	206	341	47	112	6.53	187	32	31	0.95	0.52	0.03	3.2	6.81	1.06	4.77	1.44	0.61	1.92	0.35	2.35	0.5	1.5	0.22	1.42	0.22	13	0.27	0.156574	North China Craton	Gao et al., 2019
B-2	6LB14-5	51.96	14.81	10.79	12.71	6.74	0.24	1.87	0.17	0.68	0.03	1.15	100	59.2793	130.986	43.663	4080	292	397	52	138	2.14	193	53	29	0.99	0.5	0.03	2.85	6.36	1.03	4.87	1.56	0.65	2.13	0.4	2.68	0.57	1.7	0.25	1.65	0.25	14.5	0.17	0.169041	North China Craton	Gao et al., 2019
B-2	16SD46-8	50.5949	14.9785	12.5887	9.60904	7.37926	0.949905	2.66973	0.169983	0.969903	0.089991	1.75	100	57.7362	392.918	34	5819.42	270	341	49	133	54	251	153.67	67	1.84	2.37	0.18	4.96	11.3	1.84	8.89	2.64	0.97	3.48	0.63	4.07	0.89	2.58	0.38	2.49	0.38	23	0.44	0.460398	North China Craton	Gao et al., 2019
B-2	6LB03-5	49.1798	16.8034	12.3125	9.45189	7.70154	0.880176	2.71054	0.170034	0.730146	0.060012	0.97	100	59.3123	261.972	36.5703	4380	262	282	43	109	18.4	409	259	50	1.48	2.04	0.09	3.74	8.04	1.22	6.17	1.74	0.74	2.34	0.44	2.93	0.64	1.9	0.29	1.89	0.29	17.1	0.37	0.525564	North China Craton	Gao et al., 2019
B-2	17SD42-2	51.75	14.11	12.91	10.58	7.43	0.14	2.04	0.19	0.79	0.06	0.81	100	57.2879	261.972		4740	319	215	51	107	1.5	164	57	45	1.32	1.93	0.16	2.52	6.29	1.08	5.38	1.83	0.72	2.61	0.5	3.29	0.72	2.09	0.32	2.03	0.32	18.5	0.17	0.737945	North China Craton	Gao et al., 2019
B-2	16SD46-5	48.81	14.75	13.46	10.34	7.58	1.14	2.51	0.17	1.14	0.1	0.71	100	56.7553	436.62	37	6840	294	202	54	115	46	196	129.67	78	2.23	3.2	0.2	5.23	12.5	2.01	8.49	3.02	1.06	4.05	0.74	4.84	1.06	3.11	0.46	2.97	0.46	28	0.64	0.589543	North China Craton	Gao et al., 2019
B-2	16SD29-2	52.6047	13.5786	11.5688	9.74903	7.54925	1.0099	3.0397	0.179982	0.619938	0.09999	0.86	100	60.3295	436.576	38	3719.63	231	829	50	202	23	408	206.6	37	0.9	4.05	0.23	8.22	19	2.81	12.6	3.19	1.19	3.33	0.53	3.2	0.64	1.95	0.27	1.76	0.25	16.6	1.12	0.474734	North China Craton	Gao et al., 2019
B-2	16SD46-7	47.86	15.87	13.74	10.8	6.95	0.87	2.61	0.2	1.03	0.07	0.96	100	54.1036	305.634	37	6180	286	181	57	119	31	156	69.65	71	1.97	2.52	0.19	4.39	11.2	1.72	7.12	2.61	0.95	3.51	0.64	4.18	0.92	2.71	0.4	2.58	0.4	24	0.46	0.553099	North China Craton	Gao et al., 2019
B-2	16SD97-5	53.2453	10.221	10.471	10.9111	11.7012	0.780078	1.89019	0.180018	0.510051	0.090009	1.02	100	72.2552	392.997		3060.31		930	53	202	46	311	100	36	1.18	2.4	0.15	11.1	19.5		12.7	2.73	0.76	2.92	0.43	2.58	0.52	1.61	0.22	1.5	0.22	13.3	2.12	0.208332	North China Craton	Gao et al., 2020
B-2	16SD157-8	49.2849	14.6215	13.8614	12.6513	4.66047	1.29013	1.9502	0.270027	1.26013	0.150015	1.01	100	43.9323	654.995		7560.76		264	56	88	51	258	168	77	2.19	3.46	0.21	7.68	16		10.6	3.5	1.27	4.65	0.84	5.35	1.17	3.4	0.49	3.22	0.49	31	0.83	0.434092	North China Craton	Gao et al., 2020
B-2	17SD49-11	49.3749	15.3415	11.2511	10.311	10.391	0.450045	1.9902	0.160016	0.680068	0.050005	1.78	100	68.2776	218.332		4080.41		367	57	258	23	229	107	42	1.21	2.16	0.16	3.89	8.45	1.34	6.33	1.82	0.72	2.39	0.42	2.79	0.6	1.77	0.26	1.71	0.26	15.9	0.25	0.535022	North China Craton	Gao et al., 2020
B-2	16SD168-4	50.35	15.36	12.53	11.5	6.87	0.64	1.84	0.21	0.66	0.04	1.15	100	56.0975	174.648		3960		347	46	130	32	130	70	36	0.81	1.9	0.15	2.97	7.08	1.2	5.94	2.01	0.63	2.45	0.48	3.4	0.72	2.28	0.33	2.28	0.34	17.9	0.14	0.616402	North China Craton	Gao et al., 2020
B-2	16SD157-7	50.375	14.7085	13.2787	12.0288	4.9695	0.679932	2.31977	0.249975	1.24988	0.139986	0.72	100	46.5864	611.206		7499.25		253	50	74	9.2	146	63	89	2.45	3.75	0.21	10.6	23	3.26	12.8	3.71	1.31	4.69	0.84	5.28	1.14	3.31	0.49	3.14	0.48	30	1.08	0.340873	North China Craton	Gao et al., 2020
B-2	17SD11-5	50.59	14.73	13.3	10.9	6.23	0.61	2.21	0.19	1.14	0.1	0.76	100	52.191	436.62		6840		217	46	72	12.1	161	60	81	2.23	3.24	0.18	5.26	12.6	1.89	8.74	2.77	1.01	3.61	0.67	4.46	0.98	2.8	0.43	2.73	0.41	25	1.03	0.593508	North China Craton	Gao et al., 2020
B-2	17SD11-6	50.21	14.84	13.61	10.74	6.16	0.6	2.35	0.19	1.18	0.12	1.22	100	51.3336	523.944		7080		365	44	68	16	110	71	84	2.32	3.23	0.19	5.52	13.4	2.03	9.42	2.97	1.12	3.9	0.73	4.82	1.06	3.03	0.46	2.96	0.45	27	0.71	0.563807	North China Craton	Gao et al., 2020
B-2	17SD49-9	51.7852	14.8915	11.3611	10.5111	7.92079	0.670067	2.0102	0.180018	0.630063	0.040004	1.04	100	61.9016	174.665		3780.38		200	49	93	30	235	103	36	1.05	1.79	0.14	3.23	7.62	1.12	5.37	1.6	0.64	2.19	0.4	2.75	0.61	1.82	0.27	1.79	0.28	16	0.21	0.533971	North China Craton	Gao et al., 2020
B-2	16SD67-2	49.08	15.99	13.41	10.91	5.97	0.82	2.52	0.2	1.01	0.09	0.91	100	50.9206	392.958		6060		282	61	142	53	369	128	37	1	3.18	0.24	4.96	12.2	1.86	9.5	3.04	1.08	3.88	0.73	4.95	1.04	3.23	0.46	3.06	0.44	27	0.54	0.61775	North China Craton	Gao et al., 2020
B-2	15DA13-1	52.1847	13.6189	12.0006	10.1301	7.01961	1.1244	2.28032	0.239591	1.28097	0.120847	1.22	100	57.6845	527.64	49.0771	7685.84	331.328	124.404	52.8328	37.8676	23.9683	222.382	192.52	77.3252	2.41955	4.78736	0.429399	7.83262	18.1238	2.5976	11.6785	3.03788	1.13394	3.74513	0.693472	4.4379	0.969101	2.71422	0.421852	2.62253	0.409019	25.179	1.07564	0.588919	North China Craton	Gao et al., 2020
B-2	17SD49-6	51.71	14.97	11.61	10.17	8.37	0.24	2.06	0.17	0.66	0.04	1.22	100	62.6883	174.648		3960		332	50	108	11.4	158	73	41	1.21	1.75	0.11	2.94	7.71	1.19	5.71	1.71	0.65	2.29	0.42	2.86	0.64	1.91	0.29	1.92	0.3	16.9	0.25	0.573532	North China Craton	Gao et al., 2020
B-2	15DA12-1	52.6117	14.6406	10.9778	9.41406	7.2101	1.29089	2.73921	0.228792	0.823862	0.0629703	1.4	100	60.4844	274.941	43.9549	4943.17	273.192	104.488	49.8657	70.9487	23.4693	245.596	122.362	48.8092	1.5764	4.29526	0.602374	6.44946	15.5726	2.08897	8.7632	2.13668	0.835416	2.64357	0.488811	3.11656	0.690531	1.96805	0.311786	2.00205	0.309136	18.3968	0.377681	0.641702	North China Craton	Gao et al., 2020
B-2	16SD73-1	49.02	11.46	11.17	9.05	13.62	3.01	1.35	0.15	0.76	0.41	1.84	100	73.9696	1790.14		4560		1308	53	349	129	530	1331	46	1.53	4.8	0.27	22	53	6.93	29	6.66	1.78	6.79	0.91	4.8	0.85	2.42	0.31	2.05	0.28	22	5.29	0.210226	North China Craton	Gao et al., 2020
B-2	15DL05-2	52.757	13.7695	11.3125	10.3507	6.79589	1.0978	2.11195	0.214332	1.49719	0.0930515	0.92	100	58.3337	406.281	48.8568	8983.13	373.894	69.9716	48.8119	28.8791	6.62223	192.248	175.915	69.4618	2.25997	4.27607	0.346339	6.34984	16.5747	2.27281	10.666	2.85524	1.18428	3.45078	0.615079	3.84616	0.813687	2.25806	0.339515	2.1236	0.330929	21.0995	1.06309	0.648858	North China Craton	Gao et al., 2020
B-2	17SD74-3	51.5952	10.7411	11.7512	11.0311	10.7611	0.770077	2.32023	0.220022	0.640064	0.170017	1.04	100	68.0933	742.328		3840.38		996	51	172	18.7	276	90	73	2.42	8.99	0.65	36	95	12.8	47	8.07	1.72	7.01	0.92	4.92	0.97	2.8	0.43	2.95	0.46	28	1.46	0.240616	North China Craton	Gao et al., 2020
B-2	17SD66-3	51.01	10.32	11.69	10.44	13.04	1.26	1.26	0.17	0.59	0.22	0.66	100	72.2194	960.563		3540		1207	49	183	39	540	259	66	1.86	3.09	0.25	8.76	21	2.54	11.2	2.62	0.89	2.74	0.43	2.58	0.54	1.55	0.22	1.48	0.23	13	2.74	0.339877	North China Craton	Gao et al., 2020
B-2	17SD67-2	50.7149	11.2189	12.1388	11.0189	11.0889	0.69993	2.0298	0.19998	0.69993	0.189981	0.6	100	68.0402	829.495		4199.58		340	46	229	23	456	169	119	2.91	4.6	0.34	17.3	39	4.34	17.9	3.66	1.1	3.56	0.5	2.81	0.56	1.53	0.21	1.36	0.2	14.6	4.49	0.2562	North China Craton	Gao et al., 2020
B-2	GB32	50.105	10.5989	12.5087	7.68923	13.6686	2.49975	1.88981	0.19998	0.559944	0.279972	2.68	100	71.804	1222.41	33.2	3359.66	181	1179	49	226	84.8	339	440	69.4	1.87	3.66	0.23	14.6	31.3	4.11	17	3.37	0.99	3.1	0.49	2.77	0.57	1.58	0.24	1.5	0.23	14.1	1	0.241544	North China Craton	Ge et al., 2015
B-2	GB29	52.94	14.44	9.59	5.46	10.38	2.72	3.42	0.14	0.53	0.38	2.6	100	71.6109	1659.15	20.1	3180	143	454	42.2	237	96.1	461	670	79.9	2.06	4.67	0.31	21.4	42.6	5.16	19.7	3.27	1.03	2.8	0.38	1.94	0.39	1.06	0.17	1.07	0.16	10.3	0.71	0.210267	North China Craton	Ge et al., 2015
B-2	GB31	52.3948	12.0288	11.1789	6.68933	11.6888	2.0298	2.90971	0.179982	0.59994	0.29997	2.46	100	70.9033	1309.73	27	3599.64	157	806	46.1	198	74.8	447	527	82.9	2.21	4.34	0.25	16.8	36.5	4.8	19.7	3.79	1.09	3.3	0.48	2.71	0.55	1.53	0.23	1.43	0.22	14	0.36	0.248913	North China Craton	Ge et al., 2015
B-2	12JD23-1	53.4588	17.2434	9.7421	4.60962	6.02879	2.18744	5.38856	0.124844	0.789611	0.426817		100	59.0534	1863.57	22.2	4737.67	177	135	42	67	29.5	376	874	74.9	1.99	4.61	0.23	24	51	6.48	25.6	4.59	1.55	4.03	0.52	2.58	0.51	1.37	0.21	1.25	0.2	12.8	0.13	0.185079	North China Craton	Guo et al., 2015
B-2	12JD23-3	52.9067	17.3062	10.6663	5.16318	6.8205	0.903026	4.67449	0.135985	0.903026	0.520568	5.68	100	59.8429	2272.9	28.7	5418.15	207	188	48	88	11.6	544	527	92.4	2.46	5.72	0.31	33.2	76.2	10.1	39.3	7.1	1.89	6.12	0.79	3.85	0.73	1.92	0.28	1.68	0.25	19.6	0.34	0.166007	North China Craton	Guo et al., 2015
B-2	13JN06-5	49.2457	14.9134	15.2779	10.1752	6.09497	0.64797	1.92366	0.202491	1.35669	0.161993	1.06	100	48.1792	698.592	35	8040	279	132	57	99	6.29	692	242	88	2.49	4.97	0.27	10.3	24	3.17	14.9	3.84	1.21	4.51	0.67	4.61	0.85	2.74	0.35	2.54	0.34	24	1.26	0.464929	North China Craton	Guo et al., 2015
B-2	12JD36-2	51.6331	14.5712	13.5167	9.56205	5.21198	0.507002	0.718928	4.01545	0.225109	0.0385321	1.24	100	47.3305	168.239	54.3	1350.65	306		55.3		6.01	383	201	53.2	1.57	2.09	0.21	14.03	31.2	3.86	14.5	3.17	1.04	3.59	0.62	3.85	0.85	2.45	0.39	2.46	0.39	22.4	0.22	0.143534	North China Craton	Guo et al., 2015
B-2	13JN06-6	52.1623	15.8464	11.5939	7.26936	7.4444	1.1841	3.33608	0.144152	0.854613	0.164745	2.73	100	59.9424	698.592	32	4980	242		35	125	15.6	424	438	45	1.47	5.81	0.32	8.47	21	2.87	12.6	2.98	1.09	3.38	0.56	3.29	0.7	1.91	0.29	1.79	0.28	18		0.660937	North China Craton	Guo et al., 2015
B-2	12JD29-1	49.7548	13.3558	12.5451	10.4678	9.42402	1.1248	2.37121	0.186454	0.719468	0.0506668	1.19	100	63.6456	221.221	55.4	4316.81	264	309	48	139	10.76	291	172	49.4	1.41	2.96	0.2	9.52	23.2	2.98	11.8	2.49	0.88	2.91	0.5	3.06	0.67	1.9	0.3	1.87	0.3	17.6	0.7	0.299586	North China Craton	Guo et al., 2015
B-2	12JD130-3	52.6921	16.1951	9.25291	6.7303	6.40741	2.88586	4.44987	0.136221	0.875848	0.374354	0.74	100	61.7417	1634.5	24.5	5255.09	170	95	33	91	84.7	661	603	41.9	1.61	7.96	0.32	36.3	90.2	11.8	52.7	9.22	2.22	8.1	1	4.96	0.9	2.38	0.37	2.31	0.33	21.9	0.62	0.211287	North China Craton	Guo et al., 2015
B-2	11JD67-2	48.6552	12.7934	14.6872	12.0882	7.5753	0.362647	2.26655	0.271985	1.14838	0.151103	0.64	100	54.587	659.746	48.4	6890.3	286	227	40	98	4.52	166	85	57.4	1.9	3.55	0.52	4.63	14.6	2.4	13	3.68	1.22	4.53	0.82	5.26	1.15	3.34	0.52	3.44	0.53	28.1	0.03	0.738779	North China Craton	Guo et al., 2015
B-2	12JD29-3	50.667	14.1483	12.6617	11.711	6.29039	0.57645	2.75078	0.203275	0.940524	0.0505658	0.98	100	53.6566	220.78		5643.15	327	182	56	108	8.77	312	91.2	34.6	1.24	3.3	0.25	4.96	15.8	2.56	15.4	3.46	0.85	3.63	0.59	3.51	0.75	2.13	0.39	2.42	0.39	15	0.33	0.641061	North China Craton	Guo et al., 2015
B-2	12JD29-2	50.3451	14.0987	12.9618	9.88632	7.95778	0.872919	2.89281	0.192854	0.761267	0.0304507	1.32	100	58.861	132.954		4567.6	287	140	56	94	7.95	267	124	36.4	1.23	3.04	0.18	7.1	19.7		13.9	2.89	0.87	3.27	0.55	3.3	0.71	2.07	0.37	2.31	0.37	14.8	0.33	0.412556	North China Craton	Guo et al., 2015
B-2	11JD63-4	48.3904	10.6255	12.2453	11.0636	13.7632	1.62999	1.39568	0.183374	0.601059	0.101874	1.88	100	72.371	444.804	28.6	3606.36	174	1997	46	377	17.8	161	441	45.3	1.43	7.27	0.33	17.8	52.6		30.1	5.07	1.46	4.55	0.62	3.27	0.64	1.79	0.27	1.78	0.26	15.5	0.13	0.393533	North China Craton	Guo et al., 2015
B-2	14JN17-3	51.8605	13.3041	11.1836	9.2568	8.05383	2.10011	2.88511	0.183505	0.815578	0.356815	1.74	100	62.6629	1557.93	29	4893.47	230	393	38	113	54	521	381	107	2.88	5.75	0.39	23	47	6.21	26	4.86	1.46	4.61	0.66	3.49	0.71	2	0.33	2.14	0.34	18.7	2.05	0.240884	North China Craton	Guo et al., 2016
B-2	14JN21-2	49.3279	15.2501	12.1577	11.0359	6.54876	1.24305	3.11268	0.171804	0.879232	0.272865	0.89	100	55.6606	1191.38	41	5275.39	312	132	41	28	12.6	802	333	58	1.8	5.11	0.42	18.7	43	5.91	26	4.72	1.42	4.49	0.65	3.48	0.68	1.85	0.3	1.89	0.29	16.5	0.67	0.263297	North China Craton	Guo et al., 2016
B-2	13JN16-3	50.7648	13.9302	14.6033	7.68917	6.03712	1.16255	3.47746	0.193759	1.93759	0.203957	1.78	100	49.0692	890.515	29	11625.5	332	103	51	62	30	482	295	127	3.57	9.01	0.55	14.4	33	4.47	21	5.13	1.8	5.41	0.79	4.59	0.8	2.31	0.29	1.9	0.26	19.2	2.37	0.602878	North China Craton	Guo et al., 2016
B-2	14JN21-1	49.6557	15.9915	11.9303	10.5834	6.03605	1.21531	3.27122	0.151914	0.901357	0.263318	1.09	100	54.1095	1149.7	39	5408.14	292	125	39	27	13.3	913	319	63	1.87	5.53	0.52	19.2	44	5.96	25	4.65	1.34	4.45	0.65	3.41	0.67	1.82	0.29	1.86	0.28	16.4	0.66	0.277518	North China Craton	Guo et al., 2016
B-2	14JN09-2	50.4451	16.2488	9.84345	8.27791	8.07326	1.16648	3.54037	0.143252	1.84181	0.419523	2.08	100	65.6522	1831.72	25	11050.9	183	263	44	116	23	712	323	234	4.96	8.53	0.64	21	49	6.63	28	5.74	1.94	5.6	0.86	4.62	0.9	2.42	0.36	2.27	0.34	23	2.93	0.391378	North China Craton	Guo et al., 2016
B-2	14JN09-1	50.2059	15.7434	10.1421	8.16516	8.85502	1.15321	3.31549	0.144152	1.85338	0.422158	2.7	100	67.0484	1843.23	21	11120.3	179	366	46	150	20	631	276	223	4.82	8.73	0.57	20	48	6.48	27	5.47	1.82	5.28	0.8	4.3	0.84	2.23	0.34	2.05	0.31	19.4	2.47	0.420583	North China Craton	Guo et al., 2016
B-2	13JN16-2	50.3236	14.0344	14.9949	8.68554	5.54095	1.8908	2.64914	0.222447	1.47624	0.182002	0.96	100	46.2703	794.657	37	8857.43	405	49	51	50	38	235	242	102	2.86	6.69	0.46	12.7	30	3.96	18.5	4.55	1.38	5.15	0.74	4.97	0.91	2.88	0.37	2.64	0.36	25	0.92	0.507563	North China Craton	Guo et al., 2016
B-2	TH05-5	48.6292	15.2391	13.388	12.0572	6.59396	0.780468	2.25135	0.210126	0.80048	0.05003	0.48	100	53.4414	218.441	37.2	4802.88	251	176	48.9	112	3.42	170	218	36.9	1.17	2.66	0.27	4.61	10.2		7.93	2.47	0.88	3.11	0.6	3.76	0.78	2.11	0.33	2.05	0.31	20.5		0.555966	North China Craton	Huang et al., 2010
B-2	TH05-19	49.5725	14.1837	14.4855	11.2866	6.64923	0.684036	1.85092	0.281662	0.93552	0.0704155	0.77	100	51.6853	307.448	46.9	5613.12	339	104	45.7	73.9	6.12	90	78.1	55.5	1.57	1.96	0.14	2.98	7.68	1.27	6.5	2.26	0.83	2.8	0.59	3.62	0.82	2.29	0.36	2.42	0.35	21.5		0.633734	North China Craton	Huang et al., 2010
B-2	LQX2	51.3397	14.807	12.4375	9.998	8.10838	0.579884	1.94961	0.229954	0.509898	0.039992	1.17	100	60.3068	174.613	56.3	3059.39	351	192	48.8	61.3	19.3	132	204	33.2	1.12	1.1	0.09	3.03	5.94		4.46	1.35	0.5	1.66	0.43	2.66	0.65	1.91	0.34	2.16	0.32	17.9	0.27	0.349798	North China Craton	Li and Wei, 2017
B-2	LQQ3	47.6763	13.2011	17.9688	8.92428	5.97957	0.941506	2.48397	0.230369	2.3738	0.220353	1.91	100	43.6789	962.103	28.7	14242.8	463	37	51.4	55.8	36.6	244	202	153	4.53	3.97	0.08	18.2	35.6		24.6	5.79	2.23	4.93	0.95	5.21	0.96	2.55	0.41	2.56	0.37	25.2	2.77	0.210178	North China Craton	Li and Wei, 2017
B-2	LQF2	52.6542	15.1255	11.9764	9.26722	7.0079	0.279916	2.69919	0.139958	0.709787	0.139958	1.12	100	57.693	611.084	29.6	4258.72	189	207	43.2	142	2.54	180	56.5	76	2.23	3.42	0.27	6.51	12.9	1.89	9.13	2.3	0.91	2.48	0.47	3.04	0.65	1.79	0.26	2.04	0.32	16.4	0.49	0.506189	North China Craton	Li and Wei, 2017
B-2	LQA2	48.913	13.8358	11.7229	13.9374	8.28931	0.761885	1.78789	0.213328	0.497765	0.0406339	2.68	100	62.2344	177.416	43.4	2986.59	221	355	44.9	123	13.6	146	132	25.1	0.98	0.9	0.07	1.9	4.16	0.65	3.67	1.19	0.48	1.64	0.37	2.25	0.52	1.7	0.22	1.91	0.28	14.7	0.15	0.456411	North China Craton	Li and Wei, 2017
B-2	LQT2	49.7143	12.398	14.5918	9.07143	4.86735	0.459184	5.04082	0.142857	3.36735	0.346939	3.42	100	43.7373	1514.8	25.2	20204.1	399	81.3	15.3	21.4	25.2	381	173	165	4.72	0.29	0.01	30.4	57.3	7.61	34	6.67	3.61	5.38	0.9	4.3	0.76	1.86	0.27	1.62	0.22	20.1	3.7	0.00919161	North China Craton	Li and Wei, 2017
B-2	LQA1	49.2919	14.4548	11.845	12.0676	8.15294	0.920494	2.52883	0.202306	0.49565	0.0404613	2.23	100	61.5988	176.662	43.6	2973.9	227	239	45.4	106	11.6	163	195	21.9	0.65	0.79	0.05	1.69	3.83	0.6	3.43	1.1	0.48	1.39	0.36	2.28	0.48	1.39	0.23	1.7	0.24	14.2	0.07	0.45041	North China Craton	Li and Wei, 2017
B-2	LQQ2	48.5294	13.1953	17.1369	9.22369	5.82233	0.820328	2.511	0.210084	2.33093	0.220088	1.73	100	44.1902	960.948	30.1	13985.6	455	45.4	49.2	56.9	29.9	265	161	160	4.79	2.6	0.05	17.2	37.1	5.41	24.7	5.86	2.37	5.01	1.02	5.18	0.98	2.53	0.39	2.51	0.35	25.8	2.8	0.145651	North China Craton	Li and Wei, 2017
B-2	LQQ1	48.8186	13.4261	16.5699	8.43012	6.11734	0.770925	3.39407	0.210252	2.07249	0.190228	1.74	100	46.2477	830.574	28.8	12434.9	436	63.4	52.4	62.5	25.5	277	120	136	4	9.93	0.67	14.9	31.8	4.56	21.3	5.05	1.88	4.34	0.88	4.7	0.87	2.19	0.33	2.2	0.31	22.5	2.3	0.642141	North China Craton	Li and Wei, 2017
B-2	LQQ5	47.7933	13.2301	17.8446	9.12838	6.12245	0.914849	2.19162	0.201066	2.35247	0.221172	2.25	100	44.4318	965.681	30.9	14114.8	476	51.5	51.7	62.6	35.2	288	174	159	4.82	6.67	0.25	17.5	37.7	5.39	25.1	5.98	2.33	5.17	1.03	5.52	1	2.64	0.42	2.63	0.36	26.3	2.81	0.367244	North China Craton	Li and Wei, 2017
B-2	LQY2	48.0664	13.5302	16.7611	10.4285	6.56129	0.546774	2.34616	0.178944	1.46138	0.119296	1.07	100	47.7068	520.871	38.2	8768.27	320	39.3	49.3	74.1	9.02	182	120	61.5	2.16	5.65	0.34	8.48	19.3	2.84	14.7	3.85	1.33	4.54	0.85	5.2	1.03	3	0.38	2.86	0.41	26.3	0.66	0.641977	North China Craton	Li and Wei, 2017
B-2	LQQ4	48.8484	13.4388	17.0238	7.74084	5.86822	0.811136	3.66513	0.20028	2.19307	0.210294	1.85	100	44.5472	918.187	28.6	13158.4	442	39.1	55.9	55.6	28.7	267	138	134	4.08	7.79	0.34	14.9	32.4	4.43	20.8	4.93	1.93	4.36	0.86	4.69	0.89	2.2	0.33	2.22	0.33	22.9	2.74	0.503754	North China Craton	Li and Wei, 2017
B-2	LQJ6	50.2288	13.4003	14.0072	13.0223	5.27258	0.577	2.308	0.198965	0.895344	0.0895344	0.89	100	46.7305	390.925	37.5	5372.07	267	139	48.3	92.7	5.6	151	178	48.3	1.66	2.88	0.2	5.47	12.5	1.77	8.96	2.51	0.95	2.9	0.57	3.72	0.78	2.31	0.32	2.47	0.37	20.3	0.32	0.507309	North China Craton	Li and Wei, 2017
B-2	LQH9	46.6773	13.2406	15.5024	9.85789	8.9972	0.660528	2.48199	0.190152	2.22178	0.170136	1.58	100	57.4932	742.848	27.5	13330.7	370	413	58.3	176	16.2	315	185	147	4.1	12.2	0.78	16.4	36.5	5.01	23.8	5.33	1.81	5.15	0.87	4.48	0.8	2.11	0.31	2	0.28	20.8	1.97	0.716776	North China Craton	Li and Wei, 2017
B-2	LQJ4	48.147	12.7604	18.2192	9.84575	6.02965	0.851362	1.8129	0.230369	1.94311	0.160256	1.9	100	43.5437	699.711	40.1	11658.7	415	39.4	49.4	47.1	27	473	227	105	3.27	1.53	0.04	9.42	23.2	3.52	18.8	5.33	1.92	5.69	1.16	7.41	1.33	4.14	0.52	3.93	0.54	36.2	0.62	0.156498	North China Craton	Li and Wei, 2017
B-2	LQJ5	48.2404	12.6575	18.7762	8.96821	6.0088	0.909818	2.06959	0.229954	1.96961	0.169966	1.82	100	42.72	742.105	42.2	11817.6	408	50.9	54.2	49.8	33.7	295	243	88.4	2.78	3.37	0.13	9.69	23.7	3.57	18.6	5.19	1.78	5.67	1.08	6.42	1.23	3.47	0.45	3.28	0.46	31.6	0.68	0.335099	North China Craton	Li and Wei, 2017
B-2	LQJ2	48.3907	14.836	12.5226	10.1287	11.3559	0.502917	1.64957	0.170992	0.392275	0.0502917	1.8	100	67.8804	219.583	31.5	2353.65		415	62.8	213	17.3	86.6	76.9	26.1	0.85	1.11	0.11	1.58	3.99	0.62	3.27	1.04	0.42	1.25	0.31	1.83	0.4	1.26	0.19	1.52	0.25	11.1	0.15	0.676913	North China Craton	Li and Wei, 2017
B-2	LQH10	46.3298	12.7834	16.169	9.55758	9.49765	0.649156	2.41686	0.19974	2.21712	0.179766	1.46	100	57.7869	784.895	27.5	13302.7	375	399	63.4	187	17	306	186	145	4.27	4.79	0.11	16.7	37.4	5.14	24.2	5.39	1.86	5.05	0.88	4.27	0.72	2.37	0.29	2.05	0.28	20.7	2.06	0.276367	North China Craton	Li and Wei, 2017
B-2	LQF1	52.5908	15.4945	11.8724	7.98873	7.54603	0.754603	2.74676	0.140859	0.704296	0.160982	1.75	100	59.6977	702.879	28.5	4225.78	184	199	44.5	133	24.3	187	148	81.7	2.43	3.34	0.33	6.23	13.6	1.82	8.97	2.22	0.87	2.47	0.5	3.06	0.64	1.83	0.3	1.93	0.32	16.5	0.48	0.516566	North China Craton	Li and Wei, 2017
B-2	LQJ3	47.7972	14.7556	12.925	10.0684	11.8588	0.281633	1.6898	0.170992	0.402334	0.0502917	1.86	100	68.1352	219.583	30	2414	145	349	68.3	238	8.14	89.4	43.4	29	0.87	1.21	0.15	1.76	4.37	0.66	3.54	1.08	0.46	1.39	0.27	1.82	0.46	1.36	0.22	1.58	0.22	11.2	0.17	0.66243	North China Craton	Li and Wei, 2017
B-2	LQY1	49.1007	14.7482	14.3985	9.47242	7.59392	0.899281	2.56795	0.179856	0.959233	0.0799361	1.33	100	55.1395	349.017	39.6	5755.4	280	192	52.3	105	18.5	281	300	52.7	1.8	3.24	0.22	6.48	14.6	1.99	9.85	2.71	1.09	3.02	0.62	3.82	0.76	2.52	0.33	2.56	0.39	21.7	0.41	0.481767	North China Craton	Li and Wei, 2017
B-2	LQX6	51.4306	14.4158	12.8451	8.91357	7.96319	0.640256	2.94118	0.180072	0.620248	0.05002	1.28	100	59.0963	218.397	49.7	3721.49	349	173	43.5	92.9	10.8	188	152	37.5	1.3	1.91	0.17	8.54	16.7	1.94	7.84	1.9	0.75	2.17	0.49	2.94	0.65	1.99	0.34	2.23	0.33	19	0.63	0.215498	North China Craton	Li and Wei, 2017
B-2	LQX10	52.9226	15.2546	10.1833	10.6314	7.01629	0.753564	2.48473	0.203666	0.509165	0.0407332	2.75	100	61.6228	177.849	50.6	3054.99	325	159	41.8	53.3	25.2	240	209	30.2	0.98	1.03	0.09	2.11	5.14	0.74	3.6	1.11	0.47	1.28	0.36	2.34	0.54	1.6	0.27	1.74	0.27	14.8	0.2	0.470351	North China Craton	Li and Wei, 2017
B-2	LQX8	50.2551	14.4772	13.2866	9.04452	8.45423	0.670335	2.95148	0.190095	0.62031	0.050025	1.36	100	59.7243	218.419	46.4	3721.86	336	199	42.6	86.7	9.22	196	159	36.2	1.21	1.87	0.15	8.69	17.1	1.96	7.42	1.57	0.72	2.11	0.46	2.78	0.65	1.91	0.33	2.1	0.33	17.8	0.62	0.207343	North China Craton	Li and Wei, 2017
B-2	LQH2	52.4918	16.485	11.4274	9.33235	6.38028	0.857052	2.23257	0.148132	0.550206	0.095228		100	56.5443	415.784	34.6	3301.24	246	167	39.4	48.5	49.7	186	205	64.6	1.85	2.97	0.21	5.29	12.3	1.65	7.19	1.67	0.7	1.93	0.38	2.32	0.48	1.42	0.26	1.67	0.27	13.8	0.36	0.540964	North China Craton	Li and Wei, 2017
B-2	LQX7	50.9379	14.6053	12.9	8.87752	8.28569	0.64199	2.89899	0.18056	0.621928	0.0501555	1.56	100	59.9501	218.989	49.1	3731.57	351	166	42.1	90.2	11.2	212	161	37	1.33	2.72	0.24	12.8	26.2	3.07	11.9	2.49	0.85	2.45	0.53	3.33	0.66	2.05	0.35	2.35	0.34	19.3	0.93	0.204751	North China Craton	Li and Wei, 2017
B-2	LQY3	51.0395	14.3738	16.3135	7.99761	5.72963	0.477469	3.22292	0.228787	0.557048	0.0596837	1.11	100	45.0101	260.591	26	3342.29	183	88.7	39.2	56	4.87	238	60.6	103	2.87	3.93	0.31	16	36.6	4.74	20.4	3.91	1	3.61	0.63	3.1	0.59	1.94	0.27	2.09	0.31	16.9	1.27	0.236668	North China Craton	Li and Wei, 2017
B-2	LQY4	50.4906	14.4373	12.8254	10.5126	6.98839	1.03124	2.81338	0.210252	0.640769	0.0500601	1.36	100	55.9444	218.572	35.5	3844.61	222	209	48.3	128	16.8	269	152	34.7	1.25	3.33	0.3	5.98	14.4	1.95	8.84	2.14	0.84	2.61	0.45	2.99	0.62	1.8	0.25	1.77	0.34	16.7	0.22	0.53655	North China Craton	Li and Wei, 2017
B-2	LQH1	52.3555	17.6772	11.8648	8.10251	5.72519	2.42094	1.01418	0.109051	0.621592	0.109051		100	52.9312	476.139	32.4	3729.55	229	146	37.1	48.6	104	84	167	60.6	1.84	2.75	0.19	4.75	11	1.4	6.32	1.47	0.52	1.6	0.33	2.02	0.43	1.37	0.22	1.48	0.23	12.3	0.3	0.557836	North China Craton	Li and Wei, 2017
B-2	LQH6	53.6915	15.1244	11.2935	7.9602	7.73134	0.218905	3.15423	0.169154	0.557214	0.0995025	0.6	100	61.4705	434.447	11.7	3343.28	99	63.3	15.8	40.9	1.01	72	13	30.5	0.88	1.36	0.1	2.6	6.23	0.78	3.47	0.87	0.33	0.75	0.17	1	0.21	0.57	0.1	0.7	0.11	6.08	0.24	0.504003	North China Craton	Li and Wei, 2017
B-2	10CYK01	48.4152	10.8289	10.9389	7.0193	17.2883	2.51975	1.12989	0.179982	0.619938	1.05989		100	78.6471	4627.71	24.4	3719.63		1640	56.4	518	87	106	671	50	1.6	3.91	0.21	14.5	34.1	4.9	21.1	4.02	1.08	3.38	0.48	2.54	0.47	1.36	0.18	1.18	0.17	13	0.57	0.259822	North China Craton	Liou et al., 2017
B-2	10LF46	50.49	12.87	11.02	8.72	11.38	1.73	2.19	0.18	0.69	0.73		100	70.6455	3187.32	32.9	4140	196	846	51.8	249	47	442	656	69	2.07	3.97	0.21	16.1	37.6	5.3	22.9	4.73	1.31	4.14	0.6	3.55	0.67	1.88	0.27	1.74	0.25	19.4	0.62	0.237592	North China Craton	Liou et al., 2017
B-2	10LF12	52.9353	10.121	10.471	8.64086	13.4413	1.29013	2.34023	0.160016	0.440044	0.160016		100	74.9473	698.661	32.7	2640.26		1290	56	357	27	336	452	30	1.1	1.53	0.06	14	36.7	5.6	24.7	5.15	1.02	4.11	0.61	3.39	0.63	1.82	0.26	1.79	0.26	17.6	0.16	0.105301	North China Craton	Liou et al., 2017
B-2	10LF37	52.8006	13.9328	10.9322	8.33167	8.43169	0.770154	3.22064	0.170034	0.65013	0.760152		100	64.2531	3318.97	26.4	3900.78	149	488	38.6	127	20	664	410	129	3.55	5.02	0.23	28.1	67.9	8.6	37.2	7.57	1.56	6.34	0.91	5.06	0.94	2.63	0.37	2.25	0.33	25.9	1.57	0.172133	North China Craton	Liou et al., 2017
B-2	10LF34	51.2049	10.479	11.0389	10.5389	12.0488	0.9999	2.06979	0.209979	0.639936	0.769923		100	71.781	3361.64	38.4	3839.62		580	47.1	200	32	593	404	115	3.26	9	0.48	43.6	105	12.6	50	9.41	1.76	7.33	1.03	5.55	1.05	2.93	0.43	2.79	0.4	29.8	5.11	0.198895	North China Craton	Liou et al., 2017
B-2	XHG07	49.9897	13.9061	12.3609	12.9378	6.644	0.164813	2.72971	0.175113	1.01978	0.0721055	2.4	100	55.6077	314.827	33.04	6118.67	306.7	117.92	47.85	125.71	2.04	158.3	38.29	49.5	1.47	1.47	0.1	2.1	5.97	1.05	6.14	2.16	0.82	2.9	0.5	3.19	0.66	1.84	0.26	1.62	0.24	17.63	0.2	0.674474	North China Craton	Lv et al., 2012
B-2	XHG06	50.1169	15.3413	11.482	13.6615	4.10376	0.191367	3.72103	0.21263	1.09505	0.0744206		100	45.4428	324.935	31.41	6570.27	160.71	116.48	50.76	124.69	4.28	118.4	48.7	48.14	1.4	1.26	0.09	1.92	5.63	0.92	5.3	1.86	0.66	2.5	0.43	2.78	0.56	1.5	0.21	1.26	0.18	14.56	0.19	0.632319	North China Craton	Lv et al., 2012
B-2	08YS-101	51.55	15.94	10.63	9.76	7.52	0.92	2.89	0.12	0.55	0.12	0.77	100	62.2452	523.944	18	3300	175	180	52.6	121	28	588	356	107	2.87	2.32	0.23	14.7	35.9	4.33	18	3.34	1.07	2.39	0.4	1.95	0.4	1.06	0.14	1.08	0.16	10.4	3.47	0.152068	North China Craton	Peng et al., 2013
B-2	P10NC7	47.5124	14.1791	16.2587	11.5124	5.53234	0.696517	2.70647	0.248756	1.24378	0.109453	0.52	100	44.2275	477.892	45.4	7462.69	342	151	51.7	88	10.2	148	67	85.8	2.41	3.66	0.28	6.73	14.5	2.29	10.4	3.07	1.02	3.87	0.75	4.93	1.09	2.98	0.44	2.85	0.43	26.5	0.54	0.524002	North China Craton	Peng et al., 2015
B-2	P10NC8	47.8265	14.4899	16.3259	10.8476	5.30965	0.774117	2.80865	0.23819	1.27035	0.10917	0.68	100	43.1154	476.659	44.7	7622.07	361	155	54	90	10.8	177	99	50	1.91	6.03	0.57	13	31.5	4.54	18.4	4.26	1.13	4.7	0.85	5.33	1.11	2.99	0.45	2.91	0.43	28.1	0.61	0.446932	North China Craton	Peng et al., 2015
B-2	2004-46A*	53.2702	14.914	13.3484	10.0834	6.69482		0.690081	0.205994	0.793079		0.76	100	53.8925			4620		172	51	97		224		21		1.49	0.09	4.38	9.07	1.3	5.92	1.78	0.61	2.2	0.38	2.6	0.56	1.76	0.26	1.74	0.26	15		0.327778	North China Craton	Polat et al., 2006
B-2	2004-46B	53.1173	14.5782	13.4362	10.216	7.01646		0.658436	0.205761	0.771605		0.7	100	54.894			4500		188	57	109		169		15		1.23	0.07	3.05	6.91	1.04	4.91	1.47	0.53	1.94	0.34	2.3	0.49	1.55	0.22	1.53	0.23	12		0.388573	North China Craton	Polat et al., 2006
B-2	Z2967-54	48.49	14.18	13.93	11.12	7.52	1.04	2.48	0.23	0.92	0.09	1.65	100	55.715	392.958	45	5520	276	139	139	50	13.1	99	109	59.9	1.62	3.76	0.26	8.9	17	2.28	9.88	2.4	0.95	2.76	0.5	3.45	0.7	2.1	0.33	2.14	0.34	18.5	0.89	0.407066	North China Craton	Shan et al., 2015
B-2	Z2967-45	48.41	14.08	13.83	11.16	7.73	1.04	2.51	0.23	0.92	0.09	1.68	100	56.5706	392.958	45.3	5520	279	153	153	51	13.4	102	110	56.8	1.56	3.81	0.27	8.43	16.5	2.18	9.54	2.4	0.96	2.81	0.51	3.47	0.74	2.1	0.33	2.15	0.33	18.9	0.89	0.435476	North China Craton	Shan et al., 2015
B-2	Z2965-108	50.08	14.06	13.86	9.41	7.89	1	2.96	0.21	0.48	0.05	2.12	100	57.0201	218.31	36.6	2880	196	407	407	36.7	18.3	351	178	31.5	1.21	2.9	0.15	7.04	20.1	3.17	14.1	3.42	1.04	2.97	0.46	2.57	0.53	1.49	0.23	1.47	0.22	13.6	0.12	0.39691	North China Craton	Shan et al., 2015
B-2	HW16D09B1	53.68	12.64	10.54	9.97	7.84	1.67	2.46	0.18	0.71	0.31	2.53	100	63.4169	1353.52	38.2	4260	182	305	41.3	54.5	60.9	519	749	74.8	2.56	3.78	0.26	19.8	43	6.21	29.1	5.49	1.59	5.22	0.67	3.75	0.72	1.97	0.28	1.8	0.26	14.8	2.04	0.183947	North China Craton	Shi et al., 2019
B-2	03SD07	48.14	14.06	16.82	9.96	6.01	1.77	2.02	0.26	0.9	0.06	3.02	100	45.4362	261.972		5400		82	82	62	55	273	563	40	0.9	0.91		3.76	10.13	1.48	6.69	2.2	0.78	3.29	0.61	4.29	0.96	2.84	0.48	2.86	0.46	22.81	1	0.233196	North China Craton	Tang et al., 2007
B-2	03SD08	49.93	14.49	13.89	9.64	7.3	0.66	3.02	0.24	0.79	0.04	2.34	100	55.0524	174.648		4740		245	245	47	19	108	116	34	1.2	0.79		2.36	6.95	1.1	5.32	1.8	0.65	2.49	0.47	3.14	0.67	1.87	0.29	1.91	0.3	16.25	1	0.322539	North China Craton	Tang et al., 2007
B-2	13LB07-2	53.2649	9.45893	10.0498	11.1396	12.7526	0.645409	1.97764	0.184835	0.410072	0.116153	0.79	100	74.7301	507.149	33.754	2460.43	183.234																												North China Craton	Unpublished data
B-2	18QXB11-1	50.0865	18.3947	6.68434	14.4537	7.45207	0.7882	1.78113	0.125907	0.229294	0.00409454	2.2	100	72.2081	17.8776	38.8	1375.77	127																												North China Craton	Unpublished data
B-2	6LB04-1	49.0288	16.6025	11.9173	9.88795	6.10053	0.633444	4.36781	0.113636	1.16711	0.180978	0.838534	100	54.4003	848.98	26.9447	6935.09	302.164																												North China Craton	Unpublished data
B-2	6LB04-2	49.3078	13.9287	11.7601	11.2545	10.4928	0.385187	2.33555	0.139602	0.39421	0.0014598	0.845355	100	67.5258	45.7334	43.004	2288.3	239.855																												North China Craton	Unpublished data
B-2	LQX4	52.7962	14.5119	11.9663	10.2726	7.36621	0.751654	1.5434	0.230507	0.511124	0.0501102	1.38	100	58.9256	218.791	54.2	3066.75	326																												North China Craton	Unpublished data
B-2	6LB03-6	52.0545	13.9196	13.2274	9.36596	6.05853	0.932825	3.31844	0.181437	0.875471	0.0658031	1.00787	100	51.631	346.072	37.1719	5053.07	280.806																												North China Craton	Unpublished data
B-2	18LBB18-9	48.6158	16.7349	10.756	19.4341	3.0353	0.0712991	0.234268	0.194545	0.84744	0.0763919	1.73	100	39.674	333.542	33.6	5084.64	347																												North China Craton	Unpublished data
B-2	17BW27-1	49.9373	14.0035	11.6477	9.9996	9.66594	1.38518	2.7097	0.219405	0.417577	0.0141551	0.97	100	65.9167	61.8041		2505.46	202																												North China Craton	Unpublished data
B-2	12LN73-1	51.9603	13.9038	12.964	9.80842	8.23818	0.439545	1.7602	0.222299	0.674979	0.0282925	0.93	100	59.6928	123.531	49.231	4049.88	299.269																												North China Craton	Unpublished data
B-2	LQX1	53.366	15.2217	9.95805	10.2577	7.6708	0.409509	2.36716	0.179784	0.519377	0.0499401	0.87	100	64.2245	218.048	51.6	3116.26	332																												North China Craton	Unpublished data
B-2	12LN50-2	49.3189	13.8575	14.467	9.85726	7.66789	1.49756	2.17513	0.214664	0.895282	0.0488336	1.56	100	55.2619	213.217	39.02	5371.69	285.2																												North China Craton	Unpublished data
B-2	12LN03-2	51.1496	14.5508	12.7438	8.34128	6.47943	2.29814	3.45786	0.180604	0.7975	0.00101463	1.24	100	54.2317	4.43008	43.813	4785	279.944																												North China Craton	Unpublished data
B-2	14JN04-7	52.9871	14.7885	10.9443	7.97241	6.3191	2.21118	3.51963	0.172431	0.821584	0.263718	1.25	100	57.367	1151.45	26	4929.51	201																												North China Craton	Unpublished data
B-2	JB6067	47.7162	16.3634	12.8774	10.4578	7.68955	1.54816	2.49141	0.166094	0.643871	0.0461373	2.33	100	58.1873	201.444	38.7	3863.23																													North China Craton	Unpublished data
B-2	12LN73-3	51.584	14.3891	12.2156	9.8946	8.4247	0.431078	2.20789	0.194843	0.622893	0.0353343	0.81	100	61.6458	154.276	48.717	3737.36	294.843																												North China Craton	Unpublished data
B-2	C13-6-2	50.9541	14.3626	9.79497	13.581	9.06415	0.121803	1.40073	0.162404	0.517661	0.0406009	1.34	100	68.3205	177.272		3105.97	258																												North China Craton	Unpublished data
B-2	JB6005-3	51.7754	17.9109	10.2029	7.58628	5.9027	2.17041	2.98177	0.157202	1.01319	0.299192	1.13	100	57.4153	1306.33	23.67	6079.17																													North China Craton	Unpublished data
B-2	18LBB18-0	50.9635	14.8534	12.8165	11.667	5.15282	0.736117	2.45036	0.221844	1.05779	0.0806704	0.76	100	48.3729	352.223	55	6346.74	387																												North China Craton	Unpublished data
B-2	12LN20-1	49.8208	11.3149	11.5123	13.0635	9.75355	1.26463	2.14653	0.214653	0.562958	0.34628	1.05	100	66.3805	1511.93	23.038	3377.75	209.181																												North China Craton	Unpublished data
B-2	LQT1	50.0857	12.5088	15.3334	7.08161	5.06406	0.58509	5.31625	0.131141	3.53072	0.363159	2.3	100	43.4926	1585.63	28.9	21184.3	430																												North China Craton	Unpublished data
B-2	JB6044	49.5994	16.3885	11.5244	10.8786	6.37778	0.908229	2.89624	0.19981	1.10905	0.11807	0.79	100	56.3268	515.516	42.53	6654.29																													North China Craton	Unpublished data
B-2	LQF3	52.3155	13.6441	14.8093	7.95737	5.66677	0.83657	3.56538	0.149388	0.896325	0.159347	1.04	100	47.1393	695.739	38.6	5377.95	227																												North China Craton	Unpublished data
B-2	12FX25-6	48.8837	19.6265	8.83905	12.33	4.7189	1.3903	3.46052	0.11163	0.588593	0.0507408	1.33	100	55.4403	221.544	29	3531.56	146																												North China Craton	Unpublished data
B-2	12LN40-2	48.5343	14.903	13.2298	9.37222	8.37618	1.89691	2.897	0.175115	0.570896	0.044538	1.1	100	59.6042	194.462	24.34	3425.38	127.12																												North China Craton	Unpublished data
B-2	18LBB03-7	51.3702	15.9432	11.2667	12.0751	3.87835	0.808416	3.78625	0.164753	0.638546	0.0685618	2.13	100	44.5133	299.355	38.5	3831.28	169																												North China Craton	Unpublished data
B-2	JB6061-2	53.8466	20.6791	7.45257	7.84694	2.54823	1.36513	4.97512	0.172916	0.641103	0.472232	0.74	100	44.3474	2061.86	10.39	3846.62																													North China Craton	Unpublished data
B-2	JB6017-2	49.6581	14.7892	11.3701	10.9958	8.10269	2.11419	2.10407	0.192199	0.618071	0.0556365	1.01	100	62.4172	242.92	40.02	3708.42																													North China Craton	Unpublished data
B-2	12LN77-4	45.9612	13.3015	17.9673	9.25554	9.43815	1.58469	1.10786	0.220153	1.1525	0.0111598	1.26	100	55.0401	48.7259	65.672	6915.02	570.41																												North China Craton	Unpublished data
B-2	12LN56-1	51.5336	14.5725	13.8371	8.50081	6.19429	1.37662	2.87885	0.175243	0.86406	0.0668558	1.16	100	51.0587	291.905	36.9	5184.36	241.4																												North China Craton	Unpublished data
B-2	13LB29-2	53.0594	16.0082	7.77334	6.75965	4.24936	6.08419	4.13729	0.141611	0.791597	0.995354	1.27	100	56.0244	4345.91	16.095	4749.58	186.939																												North China Craton	Unpublished data
B-2	12JD17-1	49.6276	16.1462	14.0327	9.10449	4.20676	0.894191	3.90192	0.141242	1.74367	0.201193	1.48	100	41.1295	878.448	38.3	10462	461																												North China Craton	Unpublished data
B-2	C13-7	45.6777	12.451	12.4407	13.6786	12.8224	0.268207	1.66082	0.278523	0.649887	0.0722096	2.77	100	70.6055	315.281		3899.32	149																												North China Craton	Unpublished data
B-2	19LN24-7	50.334	15.1526	12.3719	12.5533	5.67214	0.775764	2.15602	0.20452	0.743524	0.0362695	0.67	100	51.6549	158.36	41.6	4461.15	260																												North China Craton	Unpublished data
B-2	13LB54-2	49.9959	13.7315	13.5684	6.41499	8.85176	2.67163	3.60388	0.221525	0.890202	0.0502533	2.312	100	60.3233	219.416	45.554	5341.21	307.932																												North China Craton	Unpublished data
B-2	LQH4	46.7539	12.2253	17.5689	9.39872	5.57331	0.679185	2.71674	0.209748	4.06512	0.809029	1.61	100	42.5054	3532.38	25.8	24390.7	415																												North China Craton	Unpublished data
B-2	19LN08-21	51.1519	16.2935	13.8404	9.22692	5.18888	0.595611	2.30168	0.281653	1.04181	0.0777322	0.88	100	46.6304	339.394	47	6250.88	300																												North China Craton	Unpublished data
B-2	JB6061-1	52.3919	15.6283	8.67114	8.89425	7.45413	1.9472	3.80313	0.180522	0.817419	0.211961	1.19	100	66.7045	925.464	26.1	4904.52																													North China Craton	Unpublished data
B-2	15YK20-1	53.6622	11.061	9.36429	8.68243	11.0762	2.04602	2.42839	0.230697	0.663712	0.784998	4.10991	100	73.3798	3427.46	21.2	3982.27																													North China Craton	Unpublished data
B-2	LQX9	53.1491	15.0955	10.1178	11.0829	6.80618	0.59935	2.3974	0.193011	0.497765	0.0609508	2.52	100	61.0547	266.123	51.8	2986.59	340																												North China Craton	Unpublished data
B-2	19LN07-6	50.2596	7.3173	11.3454	12.5092	17.266	0.556641	0.0202415	0.274272	0.398757	0.0526279	1.06	100	78.0059	229.784	50.1	2392.54																													North China Craton	Unpublished data
B-2	13LB42-7	48.5058	13.4271	15.4625	9.66053	7.69083	1.47248	2.63267	0.229411	0.86105	0.0576054	0.95	100	53.6856	251.517	65.353	5166.3	371.615																												North China Craton	Unpublished data
B-2	WR13	53.4024	14.9466	8.75661	11.5712	8.43309	0.528416	1.21859	0.237248	0.830368	0.075488	2.38	100	69.1776	329.595		4982.21																													North China Craton	Unpublished data
B-2	12LN77-2	47.9273	18.2898	10.8669	11.181	6.65535	2.58509	1.65596	0.150449	0.687187	0.00101655	1.5	100	58.8019	4.43846	35.429	4123.12	379.925																												North China Craton	Unpublished data
B-2	19LN12-5	50.2618	14.4684	14.4785	9.59525	7.12847	0.78534	2.21506	0.16613	0.843737	0.0573903	0.62	100	53.4325	250.577	40.3	5062.42	256																												North China Craton	Unpublished data
B-2	JB6065-2	49.7376	14.7352	15.1318	9.63025	5.46087	1.19997	2.9389	0.204401	0.761674	0.199317	1.5	100	45.6831	870.256	36.35	4570.05																													North China Craton	Unpublished data
B-2	WR21	52.0386	16.7534	7.86164	8.46888	9.86771	1.63739	1.98439	0.23856	1.05183	0.0975927	3.35	100	74.5235	426.109		6311																													North China Craton	Unpublished data
B-2	15DA72-2	53.1401	18.8375	7.32396	8.18256	4.31369	2.01719	4.54127	0.206892	1.00549	0.431369	0.9	100	57.8526	1883.44	25.8271	6032.96	235.679																												North China Craton	Unpublished data
B-2	OFX011-1	49.802	15.5853	11.6357	12.2347	6.94487	0.578739	2.27434	0.21322	0.731039		1.39	100	58.1761	0	31.2	4386.23	230																												North China Craton	Unpublished data
B-2	11JD006-2	45.5067	13.0163	15.0715	13.4798	8.70441	0.90671	2.10558	0.241789	0.866411	0.100746	0.73	100	57.3735	439.875	49.7	5198.47	293																												North China Craton	Unpublished data
B-2	11JD019-2	49.8489	14.7432	12.4371	11.43	6.42497	0.352467	3.76636	0.181269	0.745217	0.0704935	0.55	100	54.6266	307.788	42.9	4471.3	271																												North China Craton	Unpublished data
B-2	JB6028	49.4257	13.4915	16.4066	9.42783	5.80841	1.13784	1.5713	0.209146	2.32987	0.191808		100	45.2074	837.47	38.77	13979.2																													North China Craton	Unpublished data
[truncated: 1,642 more rows]

## Sheet: Reference
Data from GEOROC database
[truncated: 291 more rows]
