# Supplementary material for: Secular oxidation of Archean upper mantle caused by increasing crustal recycling
Source: Research Square preprint supplement (doi:10.21203/rs.3.rs-948127/v1), 2021-10-01
Supplement: Supplementary file 2 [file 64d96c5940759ca8626dc3b2.xlsx]

## Sheet: B-1 (Spinel Peridotite)
Sample No.	T	P	Ti	V			Stop Row	Ti	F	Row	V	fO2					Mineral assemblage and melting reaction for spinel-lherzolite were chosen from Workman and Hart (2005) and Falloon et al., (2008), respectively.																	Wo# Opx	AlT Cpx	AlT Opx	Cr# Sp	Mineral compositions were chosen from Workman and Hart (2005).
							300											T(℃)	P(Gpa)							Ol	Opx	Cpx	Sp					4.37517	0.171924	0.147949	10.654
																		1481.02	2.17441					DTi		0.008	0.0608618	0.216428	0.3			The chemcial compositions of depleted mantle (DM) are from Salters and Stracke (2004)
																		Ol (%)	Opx	Cpx	Sp			DSc		0.12	0.433184	1.13131	0.06		Co (ppm)
																	Mineral assemblage for garnet-lherzolite	57	28	13	2			DV: FMQ	-0.424	0.02994	0.266447	0.420761	1.50521		V	Ti	Sc
																	Melting reaction for harzburgite	0.0730159	-1.07302					DV: FMQ	-1	0.042156	0.342807	0.597172	1.93145		79	798	16.3
																								DV: FMQ	0	0.0232734	0.221335	0.325162	1.25281
																	Melting reaction for spinel-lherzolite	0.218845	-0.364742	-0.816616	-0.0374873			DV: FMQ	1	0.0128487	0.142906	0.177051	0.812614
																								DV: FMQ	2	0.00709348	0.0922678	0.0964049	0.52709
															P(Gpa)	T (℃)	F	Ol	Opx	Cpx	Sp	Sum		Ol corrected	Opx corrected	Cpx corrected	Sp corrected	Sum	DTi	DSc	DV: FMQ-2	DV: FMQ-1	DV: FMQ	DV: FMQ+1	DV: FMQ+2		Ti frac	Ti aggre	Sc frac	Sc aggre	V FMQ-2 frac	V FMQ-2 aggre	V FMQ-1 frac	V FMQ-1 aggre	V FMQ frac	V FMQ aggre	V FMQ+1 frac	V FMQ+1 aggre	V FMQ+2 frac
															1.5	1481.46	0.1	57.0219	27.9635	12.9183	1.99625	99.9		57.079	27.9915	12.9313	1.99825	100	0.0555841	0.337241	0.176159	0.235836	0.142321	0.0864685	0.052875		14116.8	14116.8	48.2386	48.2386	446.37	446.37	333.896	333.896	551.758	551.758	904.076	904.076	1467.8
															1.5	1481.89	0.2	57.0438	27.9271	12.8367	1.9925	99.8		57.1581	27.983	12.8624	1.9965	100	0.055431	0.336519	0.175844	0.235395	0.142075	0.0863303	0.0527971		13918.6	14017.7	48.2469	48.2427	445.084	445.727	333.438	333.667	549.397	550.578	896.04	900.058	1444.06
															1.5	1482.33	0.3	57.0657	27.8906	12.755	1.98875	99.7		57.2374	27.9745	12.7934	1.99474	100	0.0552775	0.335796	0.175529	0.234954	0.141828	0.0861919	0.0527191		13722.5	13919.3	48.2553	48.2469	443.798	445.084	332.98	333.438	547.04	549.398	888.054	896.057	1420.64
															1.5	1482.76	0.4	57.0875	27.8541	12.6734	1.98501	99.6		57.3168	27.966	12.7243	1.99298	100	0.0551237	0.335071	0.175212	0.234511	0.141581	0.0860532	0.0526409		13528.4	13821.5	48.2638	48.2512	442.512	444.441	332.521	333.209	544.686	548.22	880.12	892.072	1397.55
															1.5	1483.2	0.5	57.1094	27.8176	12.5917	1.98126	99.5		57.3964	27.9574	12.655	1.99121	100	0.0549697	0.334344	0.174895	0.234067	0.141333	0.0859142	0.0525626		13336.3	13724.5	48.2722	48.2554	441.226	443.798	332.061	332.979	542.336	547.043	872.235	888.105	1374.77
															1.5	1483.63	0.6	57.1313	27.7812	12.51	1.97751	99.4		57.4762	27.9488	12.5855	1.98944	100	0.0548153	0.333616	0.174577	0.233623	0.141085	0.0857749	0.0524841		13146.3	13628.1	48.2807	48.2596	439.941	443.155	331.601	332.75	539.99	545.868	864.401	884.154	1352.32
															1.5	1484.06	0.7	57.1532	27.7447	12.4284	1.97376	99.3		57.5561	27.9403	12.516	1.98767	100	0.0546606	0.332887	0.174259	0.233178	0.140836	0.0856353	0.0524054		12958.2	13532.4	48.2892	48.2638	438.655	442.512	331.14	332.52	537.647	544.694	856.617	880.22	1330.17
															1.5	1484.5	0.8	57.1751	27.7082	12.3467	1.97001	99.2		57.6362	27.9317	12.4463	1.9859	100	0.0545056	0.332156	0.17394	0.232731	0.140586	0.0854955	0.0523266		12772.2	13437.4	48.2978	48.2681	437.37	441.869	330.678	332.29	535.309	543.52	848.882	876.303	1308.33
															1.5	1484.93	0.9	57.197	27.6717	12.265	1.96626	99.1		57.7164	27.923	12.3764	1.98412	100	0.0543502	0.331424	0.173621	0.232284	0.140337	0.0853554	0.0522477		12588.1	13343	48.3064	48.2723	436.085	441.227	330.216	332.059	532.973	542.349	841.198	872.403	1286.8
															1.5	1485.37	1	57.2188	27.6353	12.1834	1.96251	99		57.7968	27.9144	12.3064	1.98234	100	0.0541946	0.33069	0.1733	0.231836	0.140086	0.085215	0.0521685		12406	13249.3	48.315	48.2766	434.8	440.584	329.752	331.828	530.642	541.178	833.563	868.519	1265.57
															1.5	1485.8	1.1	57.2407	27.5988	12.1017	1.95876	98.9		57.8774	27.9057	12.2363	1.98055	100	0.0540386	0.329955	0.172979	0.231387	0.139836	0.0850743	0.0520892		12225.8	13156.3	48.3236	48.2809	433.515	439.941	329.288	331.598	528.314	540.008	825.977	864.651	1244.64
															1.5	1486.24	1.2	57.2626	27.5623	12.0201	1.95502	98.8		57.9581	27.8971	12.1661	1.97876	100	0.0538824	0.329218	0.172658	0.230937	0.139584	0.0849333	0.0520098		12047.5	13063.9	48.3323	48.2852	432.23	439.299	328.824	331.366	525.99	538.84	818.44	860.8	1224
															1.5	1486.67	1.3	57.2845	27.5258	11.9384	1.95127	98.7		58.039	27.8884	12.0956	1.97697	100	0.0537258	0.32848	0.172336	0.230486	0.139332	0.084792	0.0519302		11871.2	12972.1	48.341	48.2894	430.945	438.656	328.358	331.135	523.67	537.673	810.952	856.966	1203.65
															1.5	1487.11	1.4	57.3064	27.4894	11.8567	1.94752	98.6		58.1201	27.8797	12.0251	1.97517	100	0.0535689	0.32774	0.172013	0.230035	0.13908	0.0846505	0.0518504		11696.7	12881	48.3497	48.2938	429.661	438.014	327.892	330.903	521.353	536.508	803.513	853.148	1183.59
															1.5	1487.54	1.5	57.3283	27.4529	11.7751	1.94377	98.5		58.2013	27.871	11.9544	1.97337	100	0.0534117	0.326999	0.171689	0.229582	0.138827	0.0845086	0.0517705		11524.2	12790.6	48.3585	48.2981	428.376	437.371	327.426	330.672	519.041	535.343	796.122	849.346	1163.82
															1.5	1487.98	1.6	57.3502	27.4164	11.6934	1.94002	98.4		58.2827	27.8622	11.8836	1.97157	100	0.0532541	0.326257	0.171365	0.229128	0.138574	0.0843665	0.0516904		11353.5	12700.8	48.3673	48.3024	427.092	436.729	326.958	330.439	516.732	534.18	788.78	845.561	1144.33
															1.5	1488.41	1.7	57.372	27.3799	11.6118	1.93627	98.3		58.3642	27.8534	11.8126	1.96976	100	0.0530963	0.325512	0.17104	0.228674	0.13832	0.0842241	0.0516101		11184.7	12611.6	48.3761	48.3067	425.808	436.086	326.49	330.207	514.426	533.018	781.486	841.791	1125.11
															1.5	1488.85	1.8	57.3939	27.3435	11.5301	1.93252	98.2		58.4459	27.8447	11.7414	1.96795	100	0.0529381	0.324767	0.170715	0.228219	0.138066	0.0840814	0.0515297		11017.8	12523	48.3849	48.3111	424.524	435.444	326.021	329.975	512.125	531.857	774.239	838.039	1106.17
															1.5	1489.28	1.9	57.4158	27.307	11.4484	1.92877	98.1		58.5278	27.8359	11.6702	1.96613	100	0.0527796	0.324019	0.170389	0.227762	0.137811	0.0839384	0.0514491		10852.7	12435.1	48.3938	48.3154	423.24	434.802	325.551	329.742	509.827	530.698	767.041	834.302	1087.5
															1.5	1489.72	2	57.4377	27.2705	11.3668	1.92503	98		58.6099	27.8271	11.5987	1.96431	100	0.0526207	0.323271	0.170062	0.227305	0.137555	0.0837951	0.0513683		10689.4	12347.8	48.4027	48.3198	421.956	434.159	325.081	329.509	507.533	529.539	759.89	830.581	1069.1
															1.5	1490.15	2.1	57.4596	27.234	11.2851	1.92128	97.9		58.6921	27.8182	11.5272	1.96249	100	0.0524616	0.32252	0.169734	0.226847	0.137299	0.0836516	0.0512874		10528	12261.2	48.4117	48.3242	420.672	433.517	324.609	329.275	505.243	528.382	752.787	826.877	1050.96
															1.5	1490.59	2.2	57.4815	27.1976	11.2034	1.91753	97.8		58.7745	27.8094	11.4555	1.96066	100	0.0523021	0.321768	0.169406	0.226388	0.137043	0.0835077	0.0512063		10368.3	12175.1	48.4206	48.3285	419.389	432.875	324.137	329.042	502.956	527.227	745.731	823.188	1033.08
															1.5	1491.02	2.3	57.5033	27.1611	11.1218	1.91378	97.7		58.8571	27.8005	11.3836	1.95883	100	0.0521423	0.321015	0.169078	0.225928	0.136786	0.0833635	0.0511251		10210.4	12089.7	48.4296	48.3329	418.105	432.233	323.665	328.808	500.673	526.072	738.722	819.516	1015.47
															1.5	1491.46	2.4	57.5252	27.1246	11.0401	1.91003	97.6		58.9398	27.7916	11.3116	1.957	100	0.0519822	0.32026	0.168748	0.225467	0.136528	0.0832191	0.0510437		10054.3	12004.9	48.4387	48.3373	416.822	431.591	323.191	328.574	498.394	524.919	731.759	815.859	998.106
															1.5	1491.89	2.5	57.5471	27.0881	10.9585	1.90628	97.5		59.0227	27.7827	11.2394	1.95516	100	0.0518217	0.319504	0.168418	0.225005	0.13627	0.0830743	0.0509621		9899.97	11920.7	48.4478	48.3418	415.539	430.948	322.717	328.34	496.119	523.767	724.844	812.219	980.997
															1.5	1492.33	2.6	57.569	27.0517	10.8768	1.90253	97.4		59.1057	27.7738	11.1671	1.95332	100	0.0516609	0.318746	0.168087	0.224542	0.136012	0.0829292	0.0508803		9747.38	11837.1	48.4569	48.3462	414.256	430.306	322.242	328.105	493.848	522.616	717.975	808.594	964.138
															1.5	1492.76	2.7	57.5909	27.0152	10.7951	1.89878	97.3		59.189	27.7648	11.0947	1.95147	100	0.0514998	0.317986	0.167756	0.224078	0.135753	0.0827839	0.0507984		9596.52	11754.1	48.466	48.3506	412.973	429.664	321.766	327.87	491.58	521.467	711.152	804.985	947.525
															1.5	1493.2	2.8	57.6128	26.9787	10.7135	1.89504	97.2		59.2724	27.7559	11.0221	1.94962	100	0.0513383	0.317225	0.167423	0.223613	0.135493	0.0826382	0.0507163		9447.39	11671.8	48.4752	48.3551	411.69	429.023	321.29	327.635	489.316	520.319	704.375	801.392	931.156
															1.5	1493.63	2.9	57.6347	26.9422	10.6318	1.89129	97.1		59.356	27.7469	10.9493	1.94777	100	0.0511765	0.316462	0.16709	0.223147	0.135233	0.0824923	0.0506341		9299.97	11590	48.4844	48.3595	410.408	428.381	320.813	327.4	487.056	519.172	697.644	797.814	915.027
															1.5	1494.06	3	57.6565	26.9058	10.5502	1.88754	97		59.4397	27.7379	10.8764	1.94592	100	0.0510144	0.315698	0.166757	0.222681	0.134972	0.082346	0.0505517		9154.25	11508.8	48.4936	48.364	409.125	427.739	320.334	327.165	484.8	518.026	690.959	794.252	899.136
															1.5	1494.5	3.1	57.6784	26.8693	10.4685	1.88379	96.9		59.5237	27.7289	10.8034	1.94405	100	0.050852	0.314932	0.166423	0.222213	0.134711	0.0821995	0.0504691		9010.21	11428.2	48.5029	48.3685	407.843	427.097	319.856	326.929	482.548	516.881	684.32	790.706	883.48
															1.5	1494.93	3.2	57.7003	26.8328	10.3868	1.88004	96.8		59.6078	27.7199	10.7302	1.94219	100	0.0506892	0.314164	0.166088	0.221744	0.134449	0.0820526	0.0503863		8867.84	11348.2	48.5122	48.373	406.561	426.455	319.376	326.693	480.299	515.738	677.726	787.176	868.056
															1.5	1495.37	3.3	57.7222	26.7964	10.3052	1.87629	96.7		59.692	27.7108	10.6568	1.94032	100	0.0505261	0.313395	0.165752	0.221275	0.134187	0.0819055	0.0503034		8727.14	11268.7	48.5215	48.3775	405.279	425.814	318.896	326.457	478.054	514.596	671.177	783.66	852.861
															1.5	1495.8	3.4	57.7441	26.7599	10.2235	1.87254	96.6		59.7765	27.7017	10.5833	1.93845	100	0.0503626	0.312625	0.165416	0.220804	0.133924	0.081758	0.0502203		8588.08	11189.9	48.5309	48.382	403.997	425.172	318.414	326.22	475.813	513.456	664.673	780.161	837.892
															1.5	1496.24	3.5	57.766	26.7234	10.1418	1.86879	96.5		59.8611	27.6926	10.5097	1.93657	100	0.0501988	0.311852	0.165079	0.220332	0.13366	0.0816102	0.050137		8450.66	11111.6	48.5403	48.3865	402.715	424.53	317.932	325.983	473.576	512.316	658.214	776.677	823.147
															1.5	1496.67	3.6	57.7878	26.6869	10.0602	1.86505	96.4		59.9459	27.6835	10.4359	1.93469	100	0.0500346	0.311079	0.164741	0.21986	0.133396	0.0814621	0.0500535		8314.87	11033.9	48.5498	48.391	401.434	423.889	317.45	325.746	471.343	511.178	651.799	773.208	808.622
															1.5	1497.11	3.7	57.8097	26.6505	9.97852	1.8613	96.3		60.0309	27.6744	10.3619	1.93281	100	0.0498702	0.310303	0.164402	0.219386	0.133132	0.0813138	0.0499699		8180.68	10956.8	48.5592	48.3956	400.152	423.247	316.966	325.509	469.114	510.041	645.429	769.754	794.316
															1.5	1497.54	3.8	57.8316	26.614	9.89686	1.85755	96.2		60.116	27.6653	10.2878	1.93092	100	0.0497053	0.309526	0.164063	0.218912	0.132867	0.0811651	0.0498861		8048.1	10880.3	48.5688	48.4002	398.871	422.606	316.482	325.271	466.888	508.906	639.104	766.316	780.225
															1.5	1497.98	3.9	57.8535	26.5775	9.8152	1.8538	96.1		60.2013	27.6561	10.2135	1.92903	100	0.0495402	0.308747	0.163723	0.218436	0.132601	0.0810161	0.0498021		7917.1	10804.3	48.5783	48.4047	397.59	421.964	315.996	325.033	464.666	507.771	632.822	762.893	766.346
															1.5	1498.41	4	57.8754	26.541	9.73354	1.85005	96		60.2869	27.6469	10.1391	1.92714	100	0.0493746	0.307967	0.163383	0.21796	0.132335	0.0808667	0.049718		7787.67	10728.9	48.5879	48.4093	396.308	421.323	315.51	324.795	462.448	506.638	626.584	759.485	752.678
															1.5	1498.85	4.1	57.8973	26.5046	9.65187	1.8463	95.9		60.3725	27.6377	10.0645	1.92524	100	0.0492088	0.307185	0.163042	0.217482	0.132068	0.0807171	0.0496336		7659.81	10654	48.5975	48.4139	395.028	420.681	315.023	324.557	460.234	505.506	620.39	756.093	739.217
															1.5	1499.28	4.2	57.9191	26.4681	9.57021	1.84255	95.8		60.4584	27.6285	9.98978	1.92333	100	0.0490426	0.306402	0.1627	0.217004	0.131801	0.0805672	0.0495491		7533.5	10579.7	48.6072	48.4185	393.747	420.04	314.536	324.318	458.024	504.376	614.24	752.715	725.961
															1.5	1499.72	4.3	57.941	26.4316	9.48855	1.8388	95.7		60.5444	27.6192	9.91489	1.92143	100	0.048876	0.305616	0.162357	0.216524	0.131533	0.0804169	0.0494645		7408.72	10506	48.6169	48.4231	392.466	419.399	314.047	324.08	455.818	503.247	608.133	749.353	712.907
															1.5	1500.15	4.4	57.9629	26.3951	9.40689	1.83506	95.6		60.6307	27.61	9.83984	1.91951	100	0.0487091	0.30483	0.162014	0.216044	0.131265	0.0802664	0.0493796		7285.47	10432.8	48.6266	48.4277	391.186	418.758	313.558	323.84	453.616	502.119	602.069	746.006	700.053
															1.5	1500.59	4.5	57.9848	26.3587	9.32523	1.83131	95.5		60.7171	27.6007	9.76464	1.9176	100	0.0485419	0.304041	0.161669	0.215562	0.130996	0.0801155	0.0492946		7163.74	10360.2	48.6364	48.4324	389.905	418.117	313.068	323.601	451.417	500.992	596.048	742.673	687.396
															1.5	1501.02	4.6	58.0067	26.3222	9.24357	1.82756	95.4		60.8037	27.5914	9.68927	1.91568	100	0.0483743	0.303251	0.161325	0.21508	0.130726	0.0799643	0.0492094		7043.51	10288.1	48.6462	48.437	388.625	417.475	312.577	323.361	449.222	499.866	590.07	739.356	674.934
															1.5	1501.46	4.7	58.0286	26.2857	9.1619	1.82381	95.3		60.8904	27.5821	9.61375	1.91376	100	0.0482063	0.302459	0.160979	0.214596	0.130456	0.0798128	0.049124		6924.76	10216.5	48.6561	48.4417	387.345	416.834	312.085	323.121	447.032	498.742	584.135	736.053	662.664
															1.5	1501.89	4.8	58.0505	26.2492	9.08024	1.82006	95.2		60.9774	27.5727	9.53807	1.91183	100	0.048038	0.301666	0.160633	0.214112	0.130185	0.0796609	0.0490384		6807.5	10145.5	48.666	48.4464	386.065	416.193	311.592	322.881	444.845	497.619	578.242	732.766	650.584
															1.5	1502.33	4.9	58.0723	26.2128	8.99858	1.81631	95.1		61.0645	27.5634	9.46223	1.9099	100	0.0478694	0.300871	0.160286	0.213626	0.129914	0.0795088	0.0489526		6691.7	10075	48.6759	48.451	384.785	415.552	311.099	322.641	442.662	496.498	572.391	729.493	638.691
															1.5	1502.76	5	58.0942	26.1763	8.91692	1.81256	95		61.1518	27.554	9.38623	1.90796	100	0.0477003	0.300074	0.159938	0.21314	0.129642	0.0793563	0.0488667		6577.36	10005	48.6859	48.4557	383.506	414.911	310.604	322.4	440.483	495.378	566.583	726.234	626.983
															1.5	1503.2	5.1	58.1161	26.1398	8.83526	1.80881	94.9		61.2393	27.5446	9.31007	1.90602	100	0.047531	0.299275	0.159589	0.212652	0.12937	0.0792035	0.0487806		6464.46	9935.61	48.6959	48.4604	382.226	414.271	310.109	322.159	438.308	494.259	560.816	722.991	615.458
															1.5	1503.63	5.2	58.138	26.1033	8.7536	1.80507	94.8		61.327	27.5352	9.23375	1.90408	100	0.0473613	0.298475	0.15924	0.212163	0.129097	0.0790504	0.0486943		6352.99	9866.72	48.7059	48.4652	380.947	413.63	309.613	321.918	436.136	493.141	555.092	719.762	604.113
															1.5	1504.06	5.3	58.1599	26.0669	8.67194	1.80132	94.7		61.4149	27.5257	9.15727	1.90213	100	0.0471912	0.297673	0.15889	0.211674	0.128823	0.078897	0.0486078		6242.94	9798.34	48.716	48.4699	379.668	412.989	309.116	321.676	433.969	492.024	549.408	716.548	592.946
															1.5	1504.5	5.4	58.1818	26.0304	8.59027	1.79757	94.6		61.5029	27.5163	9.08063	1.90018	100	0.0470207	0.29687	0.158539	0.211183	0.128549	0.0787432	0.0485212		6134.3	9730.49	48.7261	48.4746	378.388	412.348	308.618	321.434	431.806	490.909	543.766	713.348	581.955
															1.5	1504.93	5.5	58.2036	25.9939	8.50861	1.79382	94.5		61.5912	27.5068	9.00382	1.89822	100	0.0468499	0.296064	0.158188	0.210691	0.128275	0.0785891	0.0484343		6027.05	9663.15	48.7363	48.4794	377.11	411.707	308.119	321.192	429.646	489.795	538.166	710.163	571.137
															1.5	1505.37	5.6	58.2255	25.9574	8.42695	1.79007	94.4		61.6796	27.4973	8.92685	1.89626	100	0.0466787	0.295258	0.157836	0.210198	0.127999	0.0784347	0.0483473		5921.19	9596.33	48.7465	48.4842	375.831	411.067	307.62	320.95	427.491	488.683	532.606	706.992	560.49
															1.5	1505.8	5.7	58.2474	25.921	8.34529	1.78632	94.3		61.7682	27.4878	8.84972	1.8943	100	0.0465072	0.294449	0.157483	0.209705	0.127723	0.07828	0.0482601		5816.71	9530.02	48.7567	48.4889	374.552	410.426	307.119	320.707	425.339	487.571	527.087	703.836	550.013
															1.5	1506.24	5.8	58.2693	25.8845	8.26363	1.78257	94.2		61.857	27.4782	8.77243	1.89233	100	0.0463353	0.293638	0.157129	0.20921	0.127447	0.0781249	0.0481727		5713.58	9464.22	48.767	48.4937	373.274	409.786	306.618	320.464	423.192	486.461	521.609	700.694	539.701
															1.5	1506.67	5.9	58.2912	25.848	8.18197	1.77882	94.1		61.946	27.4687	8.69497	1.89036	100	0.0461631	0.292826	0.156775	0.208714	0.12717	0.0779695	0.0480851		5611.81	9398.93	48.7774	48.4986	371.995	409.145	306.115	320.221	421.048	485.353	516.172	697.567	529.555
															1.5	1507.11	6	58.3131	25.8116	8.1003	1.77508	94		62.0352	27.4591	8.61734	1.88838	100	0.0459904	0.292013	0.15642	0.208217	0.126892	0.0778138	0.0479974		5511.37	9334.14	48.7877	48.5034	370.717	408.505	305.612	319.978	418.908	484.245	510.775	694.454	519.57
															1.5	1507.54	6.1	58.335	25.7751	8.01864	1.77133	93.9		62.1246	27.4495	8.53956	1.8864	100	0.0458174	0.291197	0.156064	0.207719	0.126614	0.0776577	0.0479094		5412.26	9269.84	48.7982	48.5082	369.439	407.864	305.108	319.734	416.772	483.139	505.418	691.355	509.746
															1.5	1507.98	6.2	58.3568	25.7386	7.93698	1.76758	93.8		62.2141	27.4399	8.4616	1.88441	100	0.0456441	0.29038	0.155707	0.20722	0.126335	0.0775013	0.0478213		5314.47	9206.05	48.8086	48.513	368.161	407.224	304.603	319.49	414.641	482.034	500.1	688.27	500.08
															1.5	1508.41	6.3	58.3787	25.7021	7.85532	1.76383	93.7		62.3039	27.4302	8.38348	1.88242	100	0.0454703	0.289561	0.155349	0.20672	0.126056	0.0773446	0.0477329		5217.99	9142.74	48.8191	48.5179	366.883	406.584	304.097	319.246	412.513	480.931	494.823	685.199	490.57
															1.5	1508.85	6.4	58.4006	25.6657	7.77366	1.76008	93.6		62.3938	27.4206	8.30519	1.88043	100	0.0452962	0.28874	0.154991	0.206218	0.125776	0.0771875	0.0476444		5122.79	9079.93	48.8297	48.5228	365.606	405.943	303.59	319.001	410.389	479.829	489.585	682.143	481.213
															1.5	1509.28	6.5	58.4225	25.6292	7.692	1.75633	93.5		62.4839	27.4109	8.22673	1.87843	100	0.0451217	0.287917	0.154632	0.205716	0.125495	0.0770301	0.0475557		5028.88	9017.61	48.8403	48.5277	364.328	405.303	303.083	318.756	408.269	478.728	484.387	679.1	472.009
															1.5	1509.72	6.6	58.4444	25.5927	7.61033	1.75258	93.4		62.5743	27.4012	8.14811	1.87643	100	0.0449469	0.287093	0.154272	0.205213	0.125214	0.0768724	0.0474668		4936.25	8955.77	48.8509	48.5326	363.051	404.663	302.574	318.511	406.153	477.628	479.228	676.072	462.954
															1.5	1510.15	6.7	58.4663	25.5562	7.52867	1.74883	93.3		62.6648	27.3915	8.06932	1.87442	100	0.0447717	0.286267	0.153912	0.204708	0.124932	0.0767143	0.0473777		4844.87	8894.41	48.8616	48.5375	361.774	404.023	302.064	318.265	404.042	476.53	474.108	673.058	454.048
															1.5	1510.59	6.8	58.4881	25.5198	7.44701	1.74509	93.2		62.7555	27.3817	7.99036	1.87241	100	0.0445961	0.285439	0.153551	0.204203	0.12465	0.0765559	0.0472884		4754.74	8833.54	48.8723	48.5424	360.497	403.383	301.554	318.02	401.934	475.433	469.027	670.057	445.287
															1.5	1511.02	6.9	58.51	25.4833	7.36535	1.74134	93.1		62.8464	27.3719	7.91122	1.87039	100	0.0444201	0.284609	0.153188	0.203696	0.124367	0.0763971	0.047199		4665.86	8773.13	48.8831	48.5473	359.22	402.743	301.042	317.774	399.83	474.337	463.985	667.071	436.67
															1.5	1511.46	7	58.5319	25.4468	7.28369	1.73759	93		62.9375	27.3622	7.83192	1.86837	100	0.0442437	0.283778	0.152826	0.203188	0.124083	0.076238	0.0471093		4578.19	8713.21	48.8939	48.5523	357.944	402.103	300.53	317.527	397.73	473.243	458.981	664.098	428.195
															1.5	1511.89	7.1	58.5538	25.4103	7.20203	1.73384	92.9		63.0288	27.3524	7.75245	1.86635	100	0.044067	0.282945	0.152462	0.202679	0.123799	0.0760786	0.0470194		4491.75	8653.75	48.9048	48.5572	356.667	401.463	300.016	317.281	395.634	472.15	454.016	661.139	419.859
															1.5	1512.33	7.2	58.5757	25.3739	7.12036	1.73009	92.8		63.1203	27.3425	7.67281	1.86432	100	0.0438899	0.28211	0.152098	0.20217	0.123514	0.0759188	0.0469294		4406.51	8594.76	48.9157	48.5622	355.391	400.823	299.502	317.034	393.543	471.058	449.089	658.194	411.662
															1.5	1512.76	7.3	58.5976	25.3374	7.0387	1.72634	92.7		63.212	27.3327	7.59299	1.86229	100	0.0437124	0.281273	0.151732	0.201659	0.123229	0.0757587	0.0468391		4322.47	8536.24	48.9266	48.5672	354.114	400.183	298.986	316.786	391.455	469.967	444.2	655.263	403.602
															1.5	1513.2	7.4	58.6195	25.3009	6.95704	1.72259	92.6		63.3039	27.3228	7.513	1.86025	100	0.0435345	0.280434	0.151366	0.201146	0.122943	0.0755982	0.0467487		4239.61	8478.17	48.9376	48.5722	352.838	399.543	298.47	316.539	389.371	468.878	439.349	652.345	395.675
															1.5	1513.63	7.5	58.6413	25.2644	6.87538	1.71884	92.5		63.396	27.3129	7.43284	1.85821	100	0.0433562	0.279594	0.150999	0.200633	0.122656	0.0754374	0.0466581		4157.93	8420.57	48.9487	48.5772	351.563	398.903	297.953	316.291	387.292	467.79	434.535	649.441	387.881
															1.5	1514.06	7.6	58.6632	25.228	6.79372	1.7151	92.4		63.4883	27.303	7.35251	1.85616	100	0.0431776	0.278752	0.150632	0.200119	0.122369	0.0752762	0.0465672		4077.41	8363.42	48.9598	48.5823	350.287	398.264	297.434	316.043	385.216	466.704	429.759	646.55	380.218
															1.5	1514.5	7.7	58.6851	25.1915	6.71206	1.71135	92.3		63.5808	27.2931	7.272	1.85411	100	0.0429985	0.277907	0.150264	0.199603	0.122081	0.0751147	0.0464762		3998.04	8306.73	48.9709	48.5873	349.011	397.624	296.915	315.795	383.144	465.619	425.021	643.673	372.683
															1.5	1514.93	7.8	58.707	25.155	6.6304	1.7076	92.2		63.6735	27.2831	7.19132	1.85206	100	0.0428191	0.277062	0.149894	0.199087	0.121792	0.0749528	0.046385		3919.81	8250.49	48.9821	48.5924	347.736	396.984	296.395	315.546	381.077	464.535	420.319	640.81	365.276
															1.5	1515.37	7.9	58.7289	25.1185	6.54873	1.70385	92.1		63.7664	27.2731	7.11046	1.85	100	0.0426393	0.276214	0.149524	0.198569	0.121503	0.0747906	0.0462936		3842.71	8194.69	48.9934	48.5975	346.461	396.345	295.874	315.297	379.014	463.452	415.655	637.96	357.993
															1.5	1515.8	8	58.7508	25.0821	6.46707	1.7001	92		63.8595	27.2631	7.02943	1.84794	100	0.0424591	0.275364	0.149154	0.19805	0.121213	0.074628	0.0462019		3766.74	8139.34	49.0047	48.6026	345.185	395.705	295.351	315.048	376.954	462.371	411.027	635.123	350.835
															1.5	1516.24	8.1	58.7726	25.0456	6.38541	1.69635	91.9		63.9528	27.2531	6.94822	1.84587	100	0.0422785	0.274513	0.148782	0.19753	0.120923	0.0744651	0.0461101		3691.87	8084.44	49.016	48.6077	343.91	395.066	294.828	314.798	374.899	461.291	406.436	632.3	343.798
															1.5	1516.67	8.2	58.7945	25.0091	6.30375	1.6926	91.8		64.0463	27.243	6.86683	1.8438	100	0.0420975	0.27366	0.14841	0.197009	0.120632	0.0743018	0.0460181		3618.1	8029.97	49.0274	48.6128	342.636	394.427	294.304	314.548	372.848	460.213	401.882	629.49	336.881
															1.5	1517.11	8.3	58.8164	24.9726	6.22209	1.68886	91.7		64.14	27.233	6.78526	1.84172	100	0.0419161	0.272804	0.148036	0.196487	0.12034	0.0741382	0.0459259		3545.43	7975.94	49.0389	48.6179	341.361	393.787	293.779	314.298	370.801	459.135	397.364	626.693	330.083
															1.5	1517.54	8.4	58.8383	24.9362	6.14043	1.68511	91.6		64.2339	27.2229	6.70352	1.83964	100	0.0417343	0.271947	0.147662	0.195964	0.120048	0.0739742	0.0458334		3473.83	7922.34	49.0504	48.6231	340.087	393.148	293.252	314.047	368.758	458.059	392.882	623.909	323.402
															1.5	1517.98	8.5	58.8602	24.8997	6.05876	1.68136	91.5		64.3281	27.2128	6.6216	1.83755	100	0.0415521	0.271088	0.147287	0.195439	0.119755	0.0738098	0.0457408		3403.3	7869.18	49.0619	48.6282	338.812	392.509	292.725	313.796	366.719	456.985	388.436	621.139	316.836
															1.5	1518.41	8.6	58.8821	24.8632	5.9771	1.67761	91.4		64.4224	27.2026	6.5395	1.83546	100	0.0413695	0.270228	0.146912	0.194914	0.119461	0.0736451	0.045648		3333.83	7816.44	49.0735	48.6334	337.538	391.87	292.196	313.545	364.684	455.912	384.025	618.382	310.383
															1.5	1518.85	8.7	58.904	24.8267	5.89544	1.67386	91.3		64.5169	27.1925	6.45722	1.83336	100	0.0411865	0.269365	0.146535	0.194387	0.119167	0.07348	0.045555		3265.41	7764.13	49.0852	48.6386	336.264	391.23	291.667	313.294	362.654	454.84	379.651	615.638	304.042
															1.5	1519.28	8.8	58.9258	24.7903	5.81378	1.67011	91.2		64.6117	27.1823	6.37476	1.83126	100	0.0410032	0.2685	0.146158	0.193859	0.118872	0.0733146	0.0454617		3198.02	7712.24	49.0969	48.6438	334.99	390.591	291.136	313.042	360.627	453.769	375.312	612.907	297.811
															1.5	1519.72	8.9	58.9477	24.7538	5.73212	1.66636	91.1		64.7066	27.1721	6.29212	1.82916	100	0.0408194	0.267634	0.14578	0.19333	0.118576	0.0731488	0.0453683		3131.66	7660.77	49.1086	48.649	333.717	389.952	290.605	312.79	358.605	452.7	371.008	610.189	291.689
															1.5	1520.15	9	58.9696	24.7173	5.65046	1.66261	91		64.8018	27.1619	6.20929	1.82705	100	0.0406352	0.266766	0.145401	0.1928	0.11828	0.0729826	0.0452746		3066.33	7609.72	49.1205	48.6543	332.443	389.313	290.072	312.537	356.586	451.632	366.739	607.484	285.674
															1.5	1520.59	9.1	58.9915	24.6809	5.56879	1.65887	90.9		64.8971	27.1517	6.12629	1.82493	100	0.0404506	0.265895	0.145021	0.192268	0.117983	0.0728161	0.0451808		3001.99	7559.09	49.1323	48.6595	331.17	388.674	289.538	312.285	354.572	450.565	362.505	604.792	279.765
															1.5	1521.02	9.2	59.0134	24.6444	5.48713	1.65512	90.8		64.9927	27.1414	6.0431	1.82282	100	0.0402656	0.265023	0.14464	0.191736	0.117686	0.0726492	0.0450867		2938.66	7508.87	49.1443	48.6648	329.897	388.035	289.004	312.032	352.562	449.5	358.306	602.113	273.959
															1.5	1521.46	9.3	59.0353	24.6079	5.40547	1.65137	90.7		65.0885	27.1311	5.95973	1.82069	100	0.0400802	0.264149	0.144259	0.191202	0.117387	0.0724819	0.0449925		2876.31	7459.06	49.1562	48.6701	328.624	387.397	288.468	311.778	350.557	448.436	354.142	599.446	268.257
															1.5	1521.89	9.4	59.0571	24.5714	5.32381	1.64762	90.6		65.1845	27.1208	5.87617	1.81856	100	0.0398943	0.263273	0.143876	0.190667	0.117089	0.0723143	0.044898		2814.95	7409.65	49.1683	48.6754	327.351	386.758	287.931	311.525	348.555	447.374	350.012	596.793	262.655
															1.5	1522.33	9.5	59.079	24.535	5.24215	1.64387	90.5		65.2807	27.1104	5.79243	1.81643	100	0.0397081	0.262395	0.143493	0.190131	0.116789	0.0721463	0.0448033		2754.55	7360.65	49.1804	48.6807	326.078	386.119	287.393	311.271	346.558	446.312	345.916	594.152	257.153
															1.5	1522.76	9.6	59.1009	24.4985	5.16049	1.64012	90.4		65.3771	27.1001	5.7085	1.81429	100	0.0395215	0.261515	0.143109	0.189593	0.116489	0.0719779	0.0447084		2695.11	7312.05	49.1925	48.686	324.806	385.48	286.854	311.016	344.564	445.253	341.855	591.524	251.749
															1.5	1523.2	9.7	59.1228	24.462	5.07882	1.63637	90.3		65.4738	27.0897	5.62439	1.81215	100	0.0393344	0.260633	0.142724	0.189055	0.116188	0.0718092	0.0446133		2636.61	7263.85	49.2047	48.6914	323.533	384.842	286.313	310.762	342.575	444.194	337.827	588.909	246.442
															1.5	1523.63	9.8	59.1447	24.4255	4.99716	1.63262	90.2		65.5706	27.0793	5.54009	1.81	100	0.0391469	0.25975	0.142339	0.188515	0.115887	0.0716401	0.044518		2579.06	7216.05	49.217	48.6967	322.261	384.203	285.772	310.507	340.59	443.137	333.833	586.306	241.229
															1.5	1524.06	9.9	59.1666	24.3891	4.9155	1.62888	90.1		65.6677	27.0689	5.45561	1.80785	100	0.0389591	0.258864	0.141952	0.187974	0.115584	0.0714706	0.0444225		2522.43	7168.64	49.2293	48.7021	320.989	383.565	285.23	310.251	338.609	442.081	329.873	583.716	236.111
															1.5	1524.5	10	59.1884	24.3526	4.83384	1.62513	90		65.7649	27.0584	5.37093	1.8057	100	0.0387708	0.257976	0.141565	0.187432	0.115282	0.0713007	0.0443267		2466.73	7121.62	49.2417	48.7075	319.717	382.926	284.686	309.996	336.633	441.026	325.946	581.138	231.085
															1.5	1524.93	10.1	59.2103	24.3161	4.75218	1.62138	89.9		65.8624	27.048	5.28607	1.80353	100	0.038582	0.257086	0.141176	0.186889	0.114978	0.0711304	0.0442308		2411.93	7074.99	49.2542	48.7129	318.446	382.288	284.141	309.74	334.661	439.973	322.053	578.573	226.151
															1.5	1525.37	10.2	59.2322	24.2796	4.67052	1.61763	89.8		65.9602	27.0375	5.20102	1.80137	100	0.0383929	0.256195	0.140787	0.186344	0.114674	0.0709598	0.0441346		2358.03	7028.74	49.2667	48.7183	317.174	381.649	283.595	309.483	332.693	438.922	318.192	576.02	221.306
															1.5	1525.8	10.3	59.2541	24.2432	4.58886	1.61388	89.7		66.0581	27.0269	5.11578	1.7992	100	0.0382033	0.255301	0.140397	0.185798	0.114369	0.0707888	0.0440382		2305.03	6982.88	49.2793	48.7238	315.903	381.011	283.048	309.227	330.729	437.871	314.365	573.48	216.549
															1.5	1526.24	10.4	59.276	24.2067	4.50719	1.61013	89.6		66.1562	27.0164	5.03035	1.79702	100	0.0380133	0.254405	0.140006	0.185252	0.114064	0.0706174	0.0439416		2252.9	6937.4	49.2919	48.7293	314.632	380.373	282.5	308.97	328.769	436.822	310.57	570.952	211.879
															1.5	1526.67	10.5	59.2979	24.1702	4.42553	1.60638	89.5		66.2546	27.0058	4.94473	1.79484	100	0.0378229	0.253508	0.139614	0.184703	0.113757	0.0704456	0.0438448		2201.65	6892.3	49.3046	48.7347	313.361	379.735	281.951	308.712	326.814	435.774	306.808	568.436	207.295
															1.5	1527.11	10.6	59.3198	24.1337	4.34387	1.60263	89.4		66.3532	26.9952	4.85892	1.79266	100	0.0376321	0.252608	0.139222	0.184154	0.11345	0.0702735	0.0437478		2151.26	6847.57	49.3173	48.7402	312.09	379.096	281.4	308.455	324.862	434.728	303.078	565.933	202.796
															1.5	1527.54	10.7	59.3416	24.0973	4.26221	1.59889	89.3		66.452	26.9846	4.77291	1.79047	100	0.0374408	0.251706	0.138828	0.183603	0.113143	0.0701009	0.0436506		2101.72	6803.22	49.3302	48.7457	310.819	378.458	280.848	308.197	322.916	433.683	299.381	563.441	198.38
															1.5	1527.98	10.8	59.3635	24.0608	4.18055	1.59514	89.2		66.551	26.974	4.68671	1.78827	100	0.0372491	0.250802	0.138434	0.183051	0.112835	0.069928	0.0435531		2053.03	6759.23	49.3431	48.7513	309.549	377.82	280.295	307.938	320.973	432.639	295.716	560.962	194.045
															1.5	1528.41	10.9	59.3854	24.0243	4.09889	1.59139	89.1		66.6503	26.9633	4.60032	1.78607	100	0.037057	0.249897	0.138038	0.182498	0.112526	0.0697547	0.0434554		2005.17	6715.62	49.356	48.7568	308.278	377.182	279.741	307.68	319.034	431.597	292.082	558.496	189.791
															1.5	1528.85	11	59.4073	23.9878	4.01722	1.58764	89		66.7498	26.9526	4.51373	1.78386	100	0.0368644	0.248989	0.137642	0.181944	0.112216	0.069581	0.0433575		1958.13	6672.37	49.369	48.7624	307.008	376.544	279.186	307.421	317.1	430.556	288.481	556.041	185.617
															1.5	1529.28	11.1	59.4292	23.9514	3.93556	1.58389	88.9		66.8495	26.9419	4.42695	1.78165	100	0.0366714	0.248079	0.137245	0.181388	0.111906	0.0694069	0.0432594		1911.92	6629.48	49.3821	48.768	305.738	375.906	278.63	307.161	315.17	429.517	284.91	553.598	181.521
															1.5	1529.72	11.2	59.4511	23.9149	3.8539	1.58014	88.8		66.9494	26.9312	4.33998	1.77944	100	0.036478	0.247167	0.136847	0.180831	0.111594	0.0692324	0.0431611		1866.51	6586.95	49.3953	48.7736	304.469	375.269	278.072	306.901	313.245	428.479	281.372	551.168	177.501
															1.5	1530.15	11.3	59.4729	23.8784	3.77224	1.57639	88.7		67.0495	26.9204	4.25281	1.77722	100	0.0362842	0.246253	0.136448	0.180273	0.111283	0.0690575	0.0430625		1821.89	6544.79	49.4085	48.7792	303.199	374.631	277.513	306.641	311.324	427.442	277.865	548.749	173.558
															1.5	1530.59	11.4	59.4948	23.8419	3.69058	1.57264	88.6		67.1499	26.9096	4.16544	1.77499	100	0.0360899	0.245337	0.136048	0.179714	0.11097	0.0688822	0.0429637		1778.07	6502.97	49.4218	48.7848	301.93	373.993	276.953	306.381	309.407	426.407	274.388	546.343	169.689
															1.5	1531.02	11.5	59.5167	23.8055	3.60892	1.5689	88.5		67.2505	26.8988	4.07787	1.77276	100	0.0358951	0.244419	0.135648	0.179153	0.110657	0.0687065	0.0428647		1735.02	6461.51	49.4351	48.7905	300.66	373.355	276.391	306.12	307.494	425.373	270.943	543.948	165.893
															1.5	1531.46	11.6	59.5386	23.769	3.52725	1.56515	88.4		67.3514	26.888	3.99011	1.77053	100	0.0356999	0.243499	0.135246	0.178591	0.110343	0.0685304	0.0427655		1692.75	6420.4	49.4485	48.7962	299.391	372.718	275.829	305.859	305.586	424.34	267.529	541.565	162.17
															1.5	1531.89	11.7	59.5605	23.7325	3.44559	1.5614	88.3		67.4524	26.8771	3.90214	1.76829	100	0.0355043	0.242577	0.134844	0.178028	0.110029	0.068354	0.042666		1651.24	6379.64	49.462	48.8018	298.123	372.08	275.265	305.598	303.682	423.309	264.145	539.194	158.518
															1.5	1532.33	11.8	59.5824	23.696	3.36393	1.55765	88.2		67.5537	26.8663	3.81398	1.76604	100	0.0353083	0.241652	0.13444	0.177464	0.109713	0.0681771	0.0425663		1610.48	6339.22	49.4756	48.8076	296.854	371.443	274.7	305.336	301.782	422.279	260.792	536.834	154.936
															1.5	1532.76	11.9	59.6043	23.6596	3.28227	1.5539	88.1		67.6552	26.8554	3.72562	1.76379	100	0.0351118	0.240726	0.134036	0.176898	0.109397	0.0679998	0.0424664		1570.47	6299.15	49.4892	48.8133	295.585	370.805	274.133	305.074	299.887	421.25	257.469	534.487	151.423
															1.5	1533.2	12	59.6261	23.6231	3.20061	1.55015	88		67.757	26.8444	3.63705	1.76154	100	0.0349148	0.239797	0.133631	0.176331	0.10908	0.0678221	0.0423663		1531.19	6259.42	49.5029	48.819	294.317	370.168	273.565	304.811	297.995	420.223	254.176	532.151	147.977
															1.5	1533.63	12.1	59.648	23.5866	3.11895	1.5464	87.9		67.859	26.8335	3.54829	1.75928	100	0.0347174	0.238867	0.133224	0.175763	0.108763	0.067644	0.0422659		1492.64	6220.02	49.5167	48.8248	293.049	369.531	272.996	304.548	296.109	419.197	250.913	529.827	144.599
															1.5	1534.06	12.2	59.6699	23.5502	3.03728	1.54265	87.8		67.9612	26.8225	3.45932	1.75701	100	0.0345195	0.237934	0.132817	0.175193	0.108445	0.0674656	0.0421653		1454.81	6180.96	49.5306	48.8306	291.781	368.893	272.426	304.285	294.226	418.173	247.68	527.514	141.286
															1.5	1534.5	12.3	59.6918	23.5137	2.95562	1.53891	87.7		68.0636	26.8115	3.37015	1.75474	100	0.0343212	0.236999	0.132409	0.174622	0.108126	0.0672867	0.0420645		1417.68	6142.24	49.5445	48.8364	290.513	368.256	271.854	304.021	292.349	417.15	244.476	525.213	138.038
															1.5	1534.93	12.4	59.7137	23.4772	2.87396	1.53516	87.6		68.1663	26.8005	3.28078	1.75246	100	0.0341225	0.236062	0.132	0.17405	0.107806	0.0671074	0.0419634		1381.26	6103.84	49.5585	48.8422	289.246	367.619	271.281	303.757	290.475	416.128	241.302	522.923	134.853
															1.5	1535.37	12.5	59.7356	23.4407	2.7923	1.53141	87.5		68.2692	26.7894	3.1912	1.75018	100	0.0339233	0.235123	0.13159	0.173477	0.107486	0.0669276	0.0418622		1345.53	6065.78	49.5726	48.848	287.978	366.982	270.707	303.493	288.606	415.108	238.158	520.645	131.731
															1.5	1535.8	12.6	59.7574	23.4043	2.71064	1.52766	87.4		68.3724	26.7783	3.10142	1.74789	100	0.0337236	0.234182	0.13118	0.172902	0.107165	0.0667475	0.0417606		1310.49	6028.03	49.5867	48.8539	286.711	366.345	270.132	303.228	286.741	414.089	235.042	518.378	128.67
															1.5	1536.24	12.7	59.7793	23.3678	2.62898	1.52391	87.3		68.4758	26.7672	3.01143	1.7456	100	0.0335235	0.233238	0.130768	0.172326	0.106843	0.066567	0.0416589		1276.12	5990.62	49.601	48.8598	285.444	365.708	269.555	302.963	284.881	413.072	231.956	516.123	125.67
															1.5	1536.67	12.8	59.8012	23.3313	2.54732	1.52016	87.2		68.5794	26.7561	2.92123	1.74331	100	0.0333229	0.232293	0.130355	0.171748	0.10652	0.066386	0.0415569		1242.42	5953.52	49.6153	48.8657	284.177	365.071	268.976	302.697	283.024	412.056	228.898	513.879	122.73
															1.5	1537.11	12.9	59.8231	23.2948	2.46565	1.51641	87.1		68.6832	26.7449	2.83083	1.741	100	0.0331218	0.231345	0.129941	0.171169	0.106197	0.0662047	0.0414547		1209.37	5916.75	49.6297	48.8716	282.911	364.434	268.397	302.431	281.173	411.041	225.87	511.646	119.848
															1.5	1537.54	13	59.845	23.2584	2.38399	1.51266	87		68.7873	26.7337	2.74022	1.73869	100	0.0329203	0.230395	0.129527	0.170589	0.105873	0.0660229	0.0413522		1176.98	5880.29	49.6442	48.8776	281.644	363.797	267.816	302.165	279.326	410.028	222.869	509.425	117.024
															1.5	1537.98	13.1	59.8669	23.2219	2.30233	1.50892	86.9		68.8917	26.7225	2.6494	1.73638	100	0.0327184	0.229443	0.129111	0.170008	0.105548	0.0658407	0.0412496		1145.23	5844.14	49.6587	48.8835	280.378	363.16	267.233	301.898	277.483	409.017	219.897	507.215	114.256
															1.5	1538.41	13.2	59.8888	23.1854	2.22067	1.50517	86.8		68.9963	26.7113	2.55837	1.73406	100	0.0325159	0.228488	0.128695	0.169425	0.105223	0.065658	0.0411466		1114.11	5808.31	49.6734	48.8895	279.112	362.523	266.649	301.631	275.645	408.006	216.954	505.016	111.544
															1.5	1538.85	13.3	59.9106	23.1489	2.13901	1.50142	86.7		69.1011	26.7	2.46714	1.73174	100	0.032313	0.227532	0.128277	0.168841	0.104896	0.065475	0.0410435		1083.62	5772.78	49.6881	48.8955	277.846	361.887	266.064	301.364	273.811	406.997	214.038	502.828	108.887
															1.5	1539.28	13.4	59.9325	23.1125	2.05735	1.49767	86.6		69.2061	26.6888	2.37569	1.72941	100	0.0321096	0.226573	0.127859	0.168255	0.104569	0.0652915	0.0409401		1053.75	5737.57	49.7029	48.9015	276.58	361.25	265.478	301.096	271.981	405.99	211.15	500.652	106.284
															1.5	1539.72	13.5	59.9544	23.076	1.97568	1.49392	86.5		69.3115	26.6774	2.28403	1.72708	100	0.0319058	0.225612	0.127439	0.167668	0.104241	0.0651076	0.0408364		1024.49	5702.66	49.7178	48.9076	275.315	360.614	264.89	300.828	270.156	404.983	208.29	498.486	103.734
															1.5	1540.15	13.6	59.9763	23.0395	1.89402	1.49017	86.4		69.417	26.6661	2.19216	1.72474	100	0.0317015	0.224649	0.127019	0.16708	0.103913	0.0649233	0.0407326		995.829	5668.05	49.7328	48.9137	274.05	359.977	264.3	300.559	268.336	403.979	205.458	496.331	101.236
															1.5	1540.59	13.7	59.9982	23.003	1.81236	1.48642	86.3		69.5228	26.6547	2.10007	1.72239	100	0.0314967	0.223683	0.126598	0.166491	0.103583	0.0647386	0.0406284		967.762	5633.74	49.7478	48.9197	272.785	359.341	263.709	300.29	266.52	402.975	202.653	494.188	98.7893
															1.5	1541.02	13.8	60.0201	22.9666	1.7307	1.48267	86.2		69.6288	26.6433	2.00777	1.72004	100	0.0312914	0.222715	0.126175	0.1659	0.103253	0.0645534	0.0405241		940.281	5599.73	49.763	48.9258	271.52	358.704	263.117	300.021	264.708	401.973	199.875	492.055	96.3929
															1.5	1541.46	13.9	60.0419	22.9301	1.64904	1.47893	86.1		69.7351	26.6319	1.91526	1.71768	100	0.0310857	0.221746	0.125752	0.165307	0.102922	0.0643678	0.0404195		913.378	5566.01	49.7782	48.932	270.255	358.068	262.523	299.751	262.901	400.973	197.124	489.933	94.046
															1.5	1541.89	14	60.0638	22.8936	1.56738	1.47518	86		69.8417	26.6205	1.82253	1.71532	100	0.0308795	0.220773	0.125328	0.164714	0.102591	0.0641818	0.0403146		887.045	5532.59	49.7935	48.9381	268.991	357.432	261.928	299.481	261.099	399.974	194.4	487.822	91.7477
															1.5	1542.33	14.1	60.0857	22.8571	1.48571	1.47143	85.9		69.9484	26.609	1.72959	1.71296	100	0.0306728	0.219799	0.124902	0.164119	0.102258	0.0639953	0.0402096		861.275	5499.46	49.809	48.9443	267.726	356.795	261.331	299.21	259.301	398.976	191.703	485.722	89.4973
															1.5	1542.76	14.2	60.1076	22.8207	1.40405	1.46768	85.8		70.0555	26.5975	1.63643	1.71058	100	0.0304656	0.218822	0.124476	0.163522	0.101925	0.0638084	0.0401042		836.059	5466.62	49.8245	48.9505	266.462	356.159	260.733	298.939	257.507	397.98	189.033	483.633	87.2939
															1.5	1543.2	14.3	60.1295	22.7842	1.32239	1.46393	85.7		70.1628	26.586	1.54305	1.7082	100	0.0302579	0.217843	0.124049	0.162924	0.101591	0.0636211	0.0399986		811.39	5434.07	49.8401	48.9567	265.198	355.523	260.133	298.668	255.718	396.985	186.389	481.554	85.1367
															1.5	1543.63	14.4	60.1514	22.7477	1.24073	1.46018	85.6		70.2703	26.5744	1.44945	1.70582	100	0.0300498	0.216862	0.12362	0.162325	0.101257	0.0634333	0.0398928		787.261	5401.8	49.8558	48.963	263.935	354.887	259.532	298.396	253.934	395.992	183.772	479.486	83.0249
															1.5	1544.06	14.5	60.1733	22.7112	1.15907	1.45643	85.5		70.3781	26.5629	1.35563	1.70343	100	0.0298412	0.215878	0.123191	0.161725	0.100921	0.0632451	0.0397867		763.663	5369.81	49.8716	48.9692	262.671	354.251	258.929	298.124	252.154	395	181.181	477.429	80.9577
															1.5	1544.5	14.6	60.1951	22.6748	1.07741	1.45268	85.4		70.4861	26.5513	1.2616	1.70104	100	0.029632	0.214892	0.122761	0.161122	0.100585	0.0630564	0.0396804		740.589	5338.1	49.8875	48.9755	261.408	353.615	258.325	297.852	250.378	394.009	178.615	475.382	78.9344
															1.5	1544.93	14.7	60.217	22.6383	0.995745	1.44894	85.3		70.5944	26.5396	1.16734	1.69864	100	0.0294224	0.213904	0.12233	0.160519	0.100248	0.0628673	0.0395738		718.032	5306.67	49.9035	48.9818	260.145	352.979	257.719	297.579	248.608	393.02	176.076	473.346	76.9541
															1.5	1545.37	14.8	60.2389	22.6018	0.914083	1.44519	85.2		70.7029	26.528	1.07287	1.69623	100	0.0292123	0.212914	0.121897	0.159914	0.0999097	0.0626778	0.039467		695.984	5275.52	49.9195	48.9882	258.882	352.344	257.111	297.305	246.841	392.032	173.562	471.321	75.0162
															1.5	1545.8	14.9	60.2608	22.5653	0.832421	1.44144	85.1		70.8117	26.5163	0.978169	1.69382	100	0.0290017	0.211921	0.121464	0.159308	0.099571	0.0624878	0.0393599		674.438	5244.64	49.9357	48.9945	257.619	351.708	256.502	297.031	245.08	391.046	171.074	469.305	73.1198
															1.5	1546.24	15	60.2827	22.5289	0.75076	1.43769	85		70.9208	26.5046	0.883247	1.6914	100	0.0287906	0.210926	0.12103	0.1587	0.0992315	0.0622973	0.0392526		653.386	5214.03	49.952	49.0009	256.357	351.072	255.892	296.757	243.323	390.061	168.611	467.301	71.2642
															1.5	1546.67	15.1	60.3046	22.4924	0.669098	1.43394	84.9		71.0301	26.4928	0.788102	1.68898	100	0.028579	0.209928	0.120594	0.158091	0.0988912	0.0621065	0.039145		632.821	5183.69	49.9684	49.0073	255.094	350.437	255.279	296.482	241.57	389.078	166.174	465.307	69.4488
															1.5	1547.11	15.2	60.3264	22.4559	0.587437	1.43019	84.8		71.1397	26.481	0.692732	1.68655	100	0.0283669	0.208928	0.120158	0.15748	0.0985501	0.0619151	0.0390372		612.736	5153.62	49.9849	49.0138	253.832	349.801	254.666	296.207	239.822	388.096	163.762	463.323	67.6727
															1.5	1547.54	15.3	60.3483	22.4195	0.505775	1.42644	84.7		71.2495	26.4692	0.597137	1.68411	100	0.0281543	0.207926	0.11972	0.156868	0.0982083	0.0617233	0.0389291		593.124	5123.81	50.0015	49.0202	252.571	349.166	254.05	295.932	238.079	387.115	161.374	461.349	65.9354
															1.5	1547.98	15.4	60.3702	22.383	0.424113	1.4227	84.6		71.3596	26.4574	0.501316	1.68167	100	0.0279412	0.206921	0.119282	0.156255	0.0978656	0.0615311	0.0388208		573.977	5094.27	50.0182	49.0267	251.309	348.53	253.433	295.656	236.341	386.136	159.011	459.386	64.236
															1.5	1548.41	15.5	60.3921	22.3465	0.342452	1.41895	84.5		71.4699	26.4456	0.405268	1.67923	100	0.0277276	0.205914	0.118842	0.15564	0.097522	0.0613384	0.0387122		555.288	5064.99	50.035	49.0332	250.048	347.895	252.815	295.379	234.607	385.159	156.673	457.433	62.574
															1.5	1548.85	15.6	60.414	22.31	0.26079	1.4152	84.4		71.5805	26.4337	0.308993	1.67677	100	0.0275135	0.204905	0.118402	0.155023	0.0971777	0.0611453	0.0386033		537.051	5035.96	50.0519	49.0397	248.786	347.259	252.194	295.102	232.877	384.182	154.36	455.49	60.9485
															1.5	1549.28	15.7	60.4359	22.2736	0.179129	1.41145	84.3		71.6914	26.4218	0.21249	1.67432	100	0.0272989	0.203893	0.11796	0.154406	0.0968326	0.0609517	0.0384942		519.257	5007.19	50.069	49.0463	247.525	346.624	251.572	294.825	231.153	383.208	152.071	453.558	59.3591
															1.5	1549.72	15.8	60.4578	22.2371	0.0974671	1.4077	84.2		71.8026	26.4098	0.115757	1.67185	100	0.0270838	0.202879	0.117518	0.153786	0.0964866	0.0607576	0.0383848		501.901	4978.68	50.0861	49.0529	246.265	345.989	250.948	294.548	229.433	382.234	149.806	451.635	57.8049
															1.5	1550.15	15.9	60.4796	22.2006	0.0158055	1.40395	84.1		71.914	26.3979	0.0187937	1.66938	100	0.0268682	0.201862	0.117074	0.153166	0.0961398	0.0605631	0.0382752		484.975	4950.42	50.1034	49.0595	245.004	345.354	250.323	294.269	227.717	381.263	147.565	449.723	56.2855
															1.5	1550.59	16	60.5015	22.1641	0	1.4002	84.0659		71.9692	26.3652	0	1.6656	100	0.0268007	0.201572	0.116868	0.152892	0.0959719	0.0604595	0.0382109		465.968	4922.39	49.9404	49.065	243.251	344.716	249.131	293.987	225.588	380.29	145.131	447.819	54.7362
															1.5	1551.02	16.1	60.5088	22.0568	0	1.4	83.9657		72.0638	26.2689	0	1.66735	100	0.0267549	0.20127	0.116665	0.152635	0.0958026	0.0603482	0.038138		447.287	4894.59	49.7805	49.0694	241.495	344.075	247.912	293.701	223.474	379.316	142.749	445.924	53.237
															1.5	1551.46	16.2	60.5161	21.9495	0	1.4	83.8657		72.1584	26.1723	0	1.66934	100	0.0267096	0.200966	0.116466	0.152382	0.0956357	0.0602384	0.038066		429.293	4867.03	49.6207	49.0728	239.74	343.431	246.688	293.411	221.368	378.341	140.394	444.038	51.7728
															1.5	1551.89	16.3	60.5234	21.8422	0	1.4	83.7657		72.2533	26.0754	0	1.67133	100	0.0266642	0.200661	0.116267	0.152128	0.0954683	0.0601284	0.0379939		411.975	4839.7	49.461	49.0752	237.993	342.784	245.467	293.117	219.276	377.365	138.071	442.161	50.3445
															1.5	1552.33	16.4	60.5307	21.7349	0	1.4	83.6657		72.3484	25.9783	0	1.67333	100	0.0266187	0.200356	0.116066	0.151874	0.0953006	0.0600181	0.0379216		395.308	4812.6	49.3014	49.0766	236.253	342.134	244.249	292.819	217.197	376.388	135.78	440.293	48.9514
															1.5	1552.76	16.5	60.538	21.6276	0	1.4	83.5657		72.4437	25.881	0	1.67533	100	0.0265731	0.20005	0.115866	0.15162	0.0951325	0.0599075	0.0378491		379.269	4785.73	49.1419	49.077	234.522	341.482	243.033	292.517	215.132	375.411	133.52	438.434	47.5927
															1.5	1553.2	16.6	60.5453	21.5203	0	1.4	83.4657		72.5392	25.7834	0	1.67734	100	0.0265274	0.199743	0.115665	0.151364	0.0949639	0.0597967	0.0377764		363.838	4759.09	48.9824	49.0764	232.797	340.827	241.819	292.212	213.08	374.433	131.291	436.583	46.2677
															1.5	1553.63	16.7	60.5526	21.413	0	1.4	83.3657		72.635	25.6857	0	1.67935	100	0.0264816	0.199436	0.115463	0.151108	0.094795	0.0596856	0.0377036		348.991	4732.68	48.8231	49.0749	231.081	340.17	240.609	291.903	211.042	373.455	129.092	434.742	44.9755
															1.5	1554.06	16.8	60.5599	21.3057	0	1.4	83.2657		72.731	25.5876	0	1.68137	100	0.0264357	0.199128	0.115261	0.150852	0.0946257	0.0595743	0.0376306		334.71	4706.5	48.6638	49.0725	229.372	339.511	239.4	291.59	209.018	372.476	126.924	432.91	43.7156
															1.5	1554.5	16.9	60.5672	21.1984	0	1.4	83.1657		72.8272	25.4894	0	1.68339	100	0.0263897	0.198819	0.115059	0.150594	0.0944559	0.0594627	0.0375574		320.973	4680.55	48.5046	49.0691	227.67	338.849	238.195	291.274	207.007	371.497	124.785	431.087	42.4872
															1.5	1554.93	17	60.5745	21.0911	0	1.4	83.0657		72.9237	25.3909	0	1.68541	100	0.0263435	0.198509	0.114856	0.150337	0.0942858	0.0593508	0.0374841		307.763	4654.83	48.3455	49.0648	225.977	338.185	236.992	290.955	205.009	370.517	122.676	429.273	41.2895
															1.5	1555.37	17.1	60.5818	20.9838	0	1.4	82.9657		73.0204	25.2922	0	1.68745	100	0.0262972	0.198199	0.114652	0.150078	0.0941152	0.0592386	0.0374106		295.059	4629.34	48.1865	49.0597	224.291	337.519	235.792	290.632	203.025	369.538	120.597	427.467	40.122
															1.5	1555.8	17.2	60.5891	20.8765	0	1.4	82.8657		73.1173	25.1932	0	1.68948	100	0.0262509	0.197887	0.114448	0.149819	0.0939442	0.0591262	0.0373369		282.844	4604.07	48.0275	49.0537	222.612	336.851	234.594	290.306	201.054	368.558	118.546	425.671	38.984
															1.5	1556.24	17.3	60.5964	20.7692	0	1.4	82.7657		73.2145	25.094	0	1.69152	100	0.0262044	0.197576	0.114243	0.149559	0.0937728	0.0590135	0.037263		271.1	4579.02	47.8687	49.0468	220.941	336.181	233.398	289.978	199.096	367.579	116.524	423.884	37.8747
															1.5	1556.67	17.4	60.6037	20.6619	0	1.4	82.6657		73.3119	24.9946	0	1.69357	100	0.0261578	0.197263	0.114038	0.149299	0.093601	0.0589005	0.0371889		259.812	4554.2	47.7099	49.0392	219.278	335.509	232.206	289.645	197.151	366.599	114.531	422.106	36.7937
															1.5	1557.11	17.5	60.611	20.5546	0	1.4	82.5657		73.4095	24.8949	0	1.69562	100	0.0261111	0.196949	0.113833	0.149038	0.0934288	0.0587873	0.0371147		248.961	4529.6	47.5512	49.0307	217.622	334.835	231.016	289.31	195.22	365.62	112.565	420.338	35.7401
															1.5	1557.54	17.6	60.6183	20.4473	0	1.4	82.4657		73.5074	24.7949	0	1.69768	100	0.0260643	0.196635	0.113627	0.148777	0.0932562	0.0586737	0.0370403		238.533	4505.21	47.3926	49.0214	215.974	334.16	229.828	288.972	193.301	364.641	110.627	418.578	34.7135
															1.5	1557.98	17.7	60.6256	20.34	0	1.4	82.3657		73.6055	24.6948	0	1.69974	100	0.0260173	0.19632	0.11342	0.148514	0.0930831	0.05856	0.0369657		228.512	4481.05	47.2341	49.0113	214.334	333.483	228.643	288.632	191.396	363.662	108.717	416.827	33.7132
															1.5	1558.41	17.8	60.6329	20.2327	0	1.4	82.2657		73.7038	24.5944	0	1.7018	100	0.0259703	0.196005	0.113213	0.148251	0.0929096	0.0584459	0.0368909		218.884	4457.11	47.0757	49.0004	212.701	332.804	227.461	288.288	189.504	362.684	106.833	415.086	32.7386
															1.5	1558.85	17.9	60.6402	20.1254	0	1.4	82.1657		73.8024	24.4937	0	1.70387	100	0.0259231	0.195688	0.113006	0.147988	0.0927357	0.0583315	0.0368159		209.635	4433.38	46.9173	48.9887	211.075	332.124	226.282	287.942	187.624	361.706	104.977	413.353	31.7892
															1.5	1559.28	18	60.6476	20.0181	0	1.4	82.0657		73.9013	24.3928	0	1.70595	100	0.0258759	0.195371	0.112798	0.147724	0.0925614	0.0582169	0.0367408		200.749	4409.86	46.7591	48.9764	209.457	331.443	225.104	287.592	185.758	360.728	103.147	411.63	30.8644
															1.5	1559.72	18.1	60.6549	19.9108	0	1.4	81.9657		74.0003	24.2916	0	1.70803	100	0.0258285	0.195053	0.112589	0.147459	0.0923867	0.058102	0.0366654		192.215	4386.56	46.6009	48.9632	207.846	330.76	223.93	287.241	183.904	359.751	101.343	409.916	29.9635
															1.5	1560.15	18.2	60.6622	19.8035	0	1.4	81.8657		74.0996	24.1902	0	1.71012	100	0.025781	0.194734	0.11238	0.147194	0.0922115	0.0579868	0.0365899		184.019	4363.47	46.4428	48.9494	206.243	330.076	222.758	286.886	182.064	358.775	99.5648	408.21	29.0861
															1.5	1560.59	18.3	60.6695	19.6962	0	1.4	81.7657		74.1992	24.0886	0	1.71221	100	0.0257333	0.194414	0.112171	0.146927	0.0920359	0.0578713	0.0365142		176.149	4340.59	46.2848	48.9348	204.648	329.39	221.589	286.53	180.235	357.799	97.8125	406.514	28.2317
															1.5	1561.02	18.4	60.6768	19.5889	0	1.4	81.6657		74.299	23.9867	0	1.71431	100	0.0256856	0.194094	0.111961	0.146661	0.0918598	0.0577556	0.0364383		168.593	4317.92	46.1269	48.9196	203.059	328.704	220.422	286.17	178.42	356.824	96.0855	404.827	27.3996
															1.5	1561.46	18.5	60.6841	19.4816	0	1.4	81.5657		74.399	23.8846	0	1.71641	100	0.0256377	0.193773	0.11175	0.146393	0.0916834	0.0576395	0.0363623		161.339	4295.45	45.969	48.9036	201.479	328.016	219.258	285.809	176.617	355.85	94.3836	403.149	26.5895
															1.5	1561.89	18.6	60.6914	19.3743	0	1.4	81.4657		74.4993	23.7822	0	1.71852	100	0.0255898	0.193451	0.111539	0.146125	0.0915065	0.0575232	0.036286		154.376	4273.18	45.8113	48.887	199.905	327.327	218.097	285.445	174.827	354.877	92.7065	401.48	25.8007
															1.5	1562.33	18.7	60.6987	19.267	0	1.4	81.3657		74.5999	23.6795	0	1.72063	100	0.0255417	0.193128	0.111327	0.145857	0.0913291	0.0574066	0.0362095		147.694	4251.12	45.6536	48.8697	198.34	326.638	216.938	285.078	173.05	353.905	91.0538	399.82	25.0328
															1.5	1562.76	18.8	60.706	19.1597	0	1.4	81.2657		74.7006	23.5766	0	1.72275	100	0.0254934	0.192805	0.111115	0.145587	0.0911514	0.0572897	0.0361329		141.281	4229.26	45.496	48.8518	196.781	325.947	215.782	284.71	171.285	352.933	89.4253	398.169	24.2853
															1.5	1563.2	18.9	60.7133	19.0524	0	1.4	81.1657		74.8017	23.4735	0	1.72487	100	0.0254451	0.19248	0.110903	0.145317	0.0909731	0.0571725	0.0360561		135.128	4207.6	45.3386	48.8332	195.23	325.255	214.628	284.339	169.532	351.963	87.8208	396.527	23.5578
															1.5	1563.63	19	60.7206	18.9451	0	1.4	81.0657		74.903	23.3701	0	1.727	100	0.0253967	0.192155	0.11069	0.145046	0.0907945	0.0570551	0.0359791		129.225	4186.13	45.1812	48.8139	193.686	324.563	213.477	283.966	167.792	350.994	86.2399	394.894	22.8496
															1.5	1564.06	19.1	60.7279	18.8378	0	1.4	80.9657		75.0045	23.2664	0	1.72913	100	0.0253481	0.191829	0.110476	0.144775	0.0906154	0.0569373	0.0359019		123.562	4164.86	45.0238	48.7941	192.15	323.869	212.329	283.591	166.064	350.026	84.6824	393.27	22.1605
															1.5	1564.5	19.2	60.7352	18.7305	0	1.4	80.8657		75.1063	23.1625	0	1.73127	100	0.0252994	0.191502	0.110262	0.144503	0.0904359	0.0568192	0.0358245		118.13	4143.79	44.8666	48.7736	190.621	323.175	211.183	283.214	164.349	349.058	83.148	391.654	21.49
															1.5	1564.93	19.3	60.7425	18.6232	0	1.4	80.7657		75.2083	23.0583	0	1.73341	100	0.0252506	0.191175	0.110047	0.14423	0.0902559	0.0567009	0.0357469		112.922	4122.9	44.7095	48.7526	189.1	322.481	210.04	282.835	162.646	348.093	81.6365	390.048	20.8375
															1.5	1565.37	19.4	60.7498	18.5159	0	1.4	80.6657		75.3106	22.9539	0	1.73556	100	0.0252017	0.190846	0.109832	0.143957	0.0900755	0.0565823	0.0356691		107.927	4102.21	44.5524	48.7309	187.585	321.785	208.9	282.454	160.955	347.128	80.1475	388.451	20.2027
															1.5	1565.8	19.5	60.7571	18.4086	0	1.4	80.5657		75.4131	22.8492	0	1.73771	100	0.0251526	0.190517	0.109616	0.143683	0.0898946	0.0564633	0.0355911		103.139	4081.7	44.3955	48.7087	186.079	321.09	207.762	282.07	159.276	346.165	78.6809	386.862	19.5852
															1.5	1566.24	19.6	60.7644	18.3013	0	1.4	80.4657		75.5159	22.7442	0	1.73987	100	0.0251034	0.190187	0.109399	0.143408	0.0897133	0.0563441	0.035513		98.5484	4061.38	44.2386	48.6859	184.579	320.393	206.627	281.686	157.609	345.203	77.2363	385.282	18.9845
															1.5	1566.67	19.7	60.7717	18.194	0	1.4	80.3657		75.619	22.639	0	1.74204	100	0.0250541	0.189857	0.109182	0.143133	0.0895315	0.0562246	0.0354346		94.1486	4041.24	44.0818	48.6625	183.087	319.696	205.495	281.299	155.955	344.242	75.8135	383.712	18.4003
															1.5	1567.11	19.8	60.779	18.0867	0	1.4	80.2657		75.7223	22.5335	0	1.74421	100	0.0250047	0.189525	0.108965	0.142857	0.0893493	0.0561047	0.0353561		89.932	4021.28	43.9251	48.6386	181.602	318.999	204.365	280.91	154.312	343.283	74.4122	382.149	17.8322
															1.5	1567.54	19.9	60.7863	17.9794	0	1.4	80.1657		75.8258	22.4278	0	1.74638	100	0.0249552	0.189192	0.108747	0.14258	0.0891666	0.0559846	0.0352773		85.8916	4001.51	43.7685	48.6141	180.124	318.301	203.238	280.52	152.681	342.325	73.0323	380.596	17.2796
															1.5	1567.98	20	60.7936	17.8721	0	1.4	80.0657		75.9297	22.3218	0	1.74857	100	0.0249055	0.188859	0.108528	0.142302	0.0889835	0.0558642	0.0351984		82.0204	3981.91	43.612	48.5891	178.654	317.603	202.113	280.128	151.063	341.369	71.6733	379.051	16.7424
															1.5	1568.41	20.1	60.8009	17.7648	0	1.4	79.9657		76.0337	22.2155	0	1.75075	100	0.0248557	0.188525	0.108309	0.142024	0.0887999	0.0557435	0.0351192		78.3119	3962.49	43.4556	48.5636	177.19	316.904	200.991	279.734	149.456	340.414	70.3351	377.516	16.2201
															1.5	1568.85	20.2	60.8082	17.6575	0	1.4	79.8657		76.1381	22.109	0	1.75294	100	0.0248058	0.18819	0.10809	0.141745	0.0886158	0.0556224	0.0350399		74.7599	3943.24	43.2992	48.5375	175.734	316.205	199.872	279.339	147.861	339.461	69.0175	375.988	15.7123
															1.5	1569.28	20.3	60.8155	17.5502	0	1.4	79.7657		76.2427	22.0022	0	1.75514	100	0.0247558	0.187854	0.10787	0.141466	0.0884313	0.0555011	0.0349603		71.3581	3924.17	43.143	48.5109	174.286	315.506	198.755	278.942	146.278	338.509	67.7201	374.47	15.2187
															1.5	1569.72	20.4	60.8228	17.4429	0	1.4	79.6657		76.3476	21.8951	0	1.75734	100	0.0247056	0.187518	0.107649	0.141185	0.0882463	0.0553795	0.0348806		68.1007	3905.27	42.9868	48.4839	172.844	314.807	197.641	278.543	144.706	337.559	66.4428	372.96	14.739
															1.5	1570.15	20.5	60.8301	17.3356	0	1.4	79.5657		76.4527	21.7877	0	1.75955	100	0.0246553	0.18718	0.107428	0.140904	0.0880609	0.0552575	0.0348007		64.982	3886.53	42.8308	48.4563	171.41	314.107	196.53	278.143	143.147	336.611	65.1853	371.458	14.2728
															1.5	1570.59	20.6	60.8374	17.2283	0	1.4	79.4657		76.5581	21.6801	0	1.76177	100	0.0246049	0.186842	0.107206	0.140623	0.087875	0.0551353	0.0347205		61.9964	3867.97	42.6748	48.4282	169.983	313.408	195.421	277.742	141.599	335.664	63.9473	369.966	13.8197
															1.5	1571.02	20.7	60.8447	17.121	0	1.4	79.3657		76.6638	21.5723	0	1.76399	100	0.0245543	0.186502	0.106983	0.14034	0.0876886	0.0550127	0.0346402		59.1389	3849.57	42.5189	48.3997	168.563	312.708	194.315	277.339	140.062	334.719	62.7287	368.481	13.3794
															1.5	1571.46	20.8	60.852	17.0137	0	1.4	79.2657		76.7697	21.4641	0	1.76621	100	0.0245037	0.186162	0.10676	0.140057	0.0875017	0.0548899	0.0345596		56.4041	3831.33	42.3631	48.3707	167.15	312.008	193.212	276.934	138.537	333.776	61.5291	367.006	12.9517
															1.5	1571.89	20.9	60.8593	16.9064	0	1.4	79.1657		76.8759	21.3557	0	1.76844	100	0.0244529	0.185821	0.106537	0.139773	0.0873144	0.0547667	0.0344789		53.7874	3813.26	42.2074	48.3412	165.745	311.308	192.111	276.528	137.024	332.834	60.3484	365.538	12.5362
															1.5	1572.33	21	60.8666	16.7991	0	1.4	79.0657		76.9824	21.247	0	1.77068	100	0.0244019	0.18548	0.106313	0.139489	0.0871266	0.0546432	0.0343979		51.2838	3795.34	42.0518	48.3112	164.346	310.608	191.013	276.121	135.522	331.895	59.1863	364.08	12.1326
															1.5	1572.76	21.1	60.8739	16.6918	0	1.4	78.9657		77.0891	21.138	0	1.77292	100	0.0243509	0.185137	0.106088	0.139203	0.0869383	0.0545194	0.0343168		48.889	3777.59	41.8963	48.2808	162.955	309.909	189.918	275.713	134.031	330.957	58.0427	362.629	11.7406
															1.5	1573.2	21.2	60.8812	16.5845	0	1.4	78.8657		77.1961	21.0287	0	1.77517	100	0.0242997	0.184794	0.105863	0.138917	0.0867496	0.0543953	0.0342354		46.5985	3759.99	41.7408	48.25	161.571	309.209	188.825	275.303	132.552	330.021	56.9171	361.187	11.3599
															1.5	1573.63	21.3	60.8885	16.4771	0	1.4	78.7657		77.3034	20.9192	0	1.77742	100	0.0242484	0.184449	0.105637	0.138631	0.0865604	0.0542709	0.0341538		44.4081	3742.54	41.5855	48.2187	160.193	308.509	187.735	274.892	131.084	329.087	55.8095	359.754	10.9902
															1.5	1574.06	21.4	60.8958	16.3698	0	1.4	78.6657		77.4109	20.8094	0	1.77968	100	0.0241969	0.184104	0.105411	0.138343	0.0863706	0.0541461	0.034072		42.3137	3725.25	41.4303	48.187	158.823	307.81	186.648	274.479	129.627	328.155	54.7196	358.328	10.6313
															1.5	1574.5	21.5	60.9031	16.2625	0	1.4	78.5657		77.5187	20.6993	0	1.78195	100	0.0241453	0.183758	0.105184	0.138055	0.0861805	0.0540211	0.03399		40.3114	3708.11	41.2751	48.1548	157.461	307.11	185.563	274.066	128.181	327.225	53.6473	356.911	10.2828
															1.5	1574.93	21.6	60.9104	16.1552	0	1.4	78.4657		77.6268	20.5889	0	1.78422	100	0.0240936	0.183411	0.104956	0.137766	0.0859898	0.0538957	0.0339078		38.3976	3691.12	41.12	48.1222	156.105	306.411	184.481	273.651	126.747	326.297	52.5921	355.502	9.94455
															1.5	1575.37	21.7	60.9177	16.0479	0	1.4	78.3657		77.7352	20.4783	0	1.7865	100	0.0240418	0.183063	0.104728	0.137477	0.0857986	0.05377	0.0338254		36.5685	3674.28	40.9651	48.0893	154.756	305.713	183.402	273.235	125.324	325.371	51.5541	354.101	9.61622
															1.5	1575.8	21.8	60.925	15.9406	0	1.4	78.2657		77.8439	20.3674	0	1.78878	100	0.0239898	0.182714	0.104499	0.137186	0.085607	0.053644	0.0337428		34.8207	3657.59	40.8102	48.0559	153.414	305.014	182.325	272.818	123.912	324.447	50.5329	352.709	9.29756
															1.5	1576.24	21.9	60.9323	15.8333	0	1.4	78.1657		77.9528	20.2561	0	1.79107	100	0.0239377	0.182364	0.10427	0.136895	0.0854148	0.0535176	0.03366		33.1508	3641.04	40.6554	48.0221	152.079	304.316	181.252	272.4	122.511	323.525	49.5283	351.325	8.98833
															1.5	1576.67	22	60.9396	15.726	0	1.4	78.0657		78.062	20.1446	0	1.79336	100	0.0238854	0.182014	0.10404	0.136603	0.0852222	0.0533909	0.033577		31.5556	3624.63	40.5007	47.9879	150.752	303.618	180.18	271.981	121.12	322.605	48.5401	349.948	8.68829
															1.5	1577.11	22.1	60.9469	15.6187	0	1.4	77.9657		78.1715	20.0328	0	1.79566	100	0.0238331	0.181662	0.10381	0.13631	0.0850291	0.053264	0.0334937		30.032	3608.37	40.3462	47.9533	149.431	302.92	179.112	271.561	119.741	321.687	47.5681	348.58	8.39718
															1.5	1577.54	22.2	60.9542	15.5114	0	1.4	77.8657		78.2813	19.9208	0	1.79797	100	0.0237806	0.18131	0.103579	0.136017	0.0848354	0.0531366	0.0334102		28.577	3592.24	40.1917	47.9183	148.117	302.223	178.046	271.139	118.373	320.771	46.6121	347.22	8.11479
															1.5	1577.98	22.3	60.9615	15.4041	0	1.4	77.7657		78.3913	19.8084	0	1.80028	100	0.0237279	0.180957	0.103347	0.135723	0.0846413	0.053009	0.0333265		27.1878	3576.25	40.0373	47.883	146.811	301.526	176.983	270.717	117.015	319.857	45.672	345.868	7.84088
															1.5	1578.41	22.4	60.9688	15.2968	0	1.4	77.6657		78.5017	19.6957	0	1.8026	100	0.0236751	0.180602	0.103115	0.135428	0.0844467	0.052881	0.0332426		25.8616	3560.4	39.883	47.8473	145.511	300.829	175.923	270.294	115.668	318.946	44.7474	344.523	7.57522
															1.5	1578.85	22.5	60.9761	15.1895	0	1.4	77.5657		78.6123	19.5828	0	1.80492	100	0.0236222	0.180247	0.102882	0.135132	0.0842516	0.0527527	0.0331585		24.5958	3544.69	39.7288	47.8112	144.218	300.133	174.865	269.87	114.332	318.036	43.8382	343.187	7.3176
															1.5	1579.28	22.6	60.9834	15.0822	0	1.4	77.4657		78.7232	19.4696	0	1.80725	100	0.0235691	0.179891	0.102649	0.134836	0.0840559	0.0526241	0.0330742		23.3877	3529.11	39.5746	47.7748	142.932	299.438	173.81	269.445	113.007	317.129	42.9441	341.858	7.0678
															1.5	1579.72	22.7	60.9907	14.9749	0	1.4	77.3657		78.8344	19.356	0	1.80959	100	0.023516	0.179534	0.102415	0.134539	0.0838598	0.0524951	0.0329896		22.235	3513.66	39.4206	47.738	141.653	298.742	172.758	269.019	111.692	316.224	42.0651	340.538	6.82562
															1.5	1580.15	22.8	60.998	14.8676	0	1.4	77.2657		78.9459	19.2422	0	1.81193	100	0.0234626	0.179176	0.10218	0.134241	0.0836631	0.0523658	0.0329049		21.1353	3498.34	39.2667	47.7008	140.381	298.048	171.708	268.592	110.388	315.321	41.2008	339.225	6.59085
															1.5	1580.59	22.9	61.0053	14.7603	0	1.4	77.1657		79.0576	19.1281	0	1.81428	100	0.0234092	0.178818	0.101945	0.133942	0.083466	0.0522362	0.0328199		20.0864	3483.15	39.1129	47.6633	139.116	297.354	170.661	268.164	109.095	314.421	40.3512	337.92	6.36329
															1.5	1581.02	23	61.0126	14.653	0	1.4	77.0657		79.1697	19.0137	0	1.81663	100	0.0233556	0.178458	0.101709	0.133643	0.0832683	0.0521062	0.0327347		19.086	3468.09	38.9591	47.6255	137.858	296.66	169.617	267.736	107.812	313.522	39.5159	336.622	6.14274
															1.5	1581.46	23.1	61.0199	14.5457	0	1.4	76.9657		79.282	18.899	0	1.81899	100	0.0233018	0.178097	0.101472	0.133342	0.0830702	0.0519759	0.0326493		18.1321	3453.16	38.8055	47.5873	136.607	295.968	168.576	267.307	106.539	312.626	38.6949	335.333	5.92903
															1.5	1581.89	23.2	61.0272	14.4384	0	1.4	76.8657		79.3947	18.784	0	1.82136	100	0.0232479	0.177736	0.101235	0.133041	0.0828715	0.0518452	0.0325636		17.2227	3438.35	38.652	47.5488	135.362	295.275	167.537	266.877	105.277	311.732	37.8879	334.05	5.72195
															1.5	1582.33	23.3	61.0345	14.3311	0	1.4	76.7657		79.5076	18.6687	0	1.82373	100	0.0231939	0.177373	0.100998	0.132739	0.0826723	0.0517142	0.0324777		16.3559	3423.66	38.4985	47.5099	134.125	294.584	166.501	266.446	104.025	310.841	37.0947	332.776	5.52133
															1.5	1582.76	23.4	61.0418	14.2238	0	1.4	76.6657		79.6208	18.553	0	1.82611	100	0.0231397	0.17701	0.100759	0.132437	0.0824725	0.0515829	0.0323916		15.5297	3409.1	38.3452	47.4708	132.894	293.893	165.468	266.014	102.783	309.952	36.3152	331.509	5.32699
															1.5	1583.2	23.5	61.0491	14.1165	0	1.4	76.5657		79.7344	18.4371	0	1.8285	100	0.0230854	0.176645	0.10052	0.132133	0.0822723	0.0514512	0.0323053		14.7425	3394.65	38.1919	47.4313	131.67	293.202	164.437	265.582	101.552	309.065	35.5491	330.25	5.13876
															1.5	1583.63	23.6	61.0564	14.0092	0	1.4	76.4657		79.8482	18.3209	0	1.83089	100	0.023031	0.17628	0.100281	0.131829	0.0820715	0.0513192	0.0322187		13.9925	3380.33	38.0388	47.3915	130.453	292.513	163.409	265.149	100.331	308.181	34.7964	328.998	4.95648
															1.5	1584.06	23.7	61.0637	13.9019	0	1.4	76.3657		79.9623	18.2044	0	1.83328	100	0.0229764	0.175913	0.10004	0.131524	0.0818702	0.0511868	0.032132		13.2781	3366.12	37.8857	47.3514	129.243	291.824	162.384	264.715	99.1201	307.299	34.0567	327.753	4.77996
															1.5	1584.5	23.8	61.071	13.7946	0	1.4	76.2657		80.0767	18.0876	0	1.83569	100	0.0229216	0.175546	0.0997996	0.131218	0.0816684	0.0510541	0.032045		12.5978	3352.03	37.7328	47.3109	128.039	291.136	161.362	264.281	97.9193	306.419	33.3299	326.516	4.60906
															1.5	1584.93	23.9	61.0783	13.6873	0	1.4	76.1657		80.1915	17.9704	0	1.8381	100	0.0228668	0.175178	0.0995582	0.130912	0.081466	0.0509211	0.0319577		11.9499	3338.05	37.5799	47.2702	126.842	290.448	160.342	263.846	96.7286	305.541	32.616	325.286	4.44362
															1.5	1585.37	24	61.0856	13.58	0	1.4	76.0657		80.3065	17.853	0	1.84052	100	0.0228117	0.174808	0.0993161	0.130604	0.0812631	0.0507876	0.0318703		11.3332	3324.19	37.4272	47.2292	125.652	289.762	159.325	263.411	95.5479	304.666	31.9145	324.064	4.28349
															1.5	1585.8	24.1	61.0929	13.4727	0	1.4	75.9657		80.4218	17.7353	0	1.84294	100	0.0227566	0.174438	0.0990733	0.130296	0.0810597	0.0506539	0.0317826		10.7462	3310.44	37.2745	47.1879	124.469	289.076	158.311	262.975	94.3773	303.794	31.2255	322.849	4.1285
															1.5	1586.52	24.2	61.1002	13.3654	0	1.4	75.8657		80.5374	17.6172	0	1.84537	100	0.0227012	0.174067	0.0988299	0.129987	0.0808557	0.0505198	0.0316947		10.1875	3296.81	37.122	47.1463	123.293	288.391	157.3	262.538	93.2165	302.924	30.5487	321.641	3.97853
															1.5	1587.23	24.3	61.1076	13.2581	0	1.4	75.7657		80.6534	17.4988	0	1.8478	100	0.0226458	0.173695	0.0985859	0.129677	0.0806512	0.0503853	0.0316065		9.65592	3283.28	36.9695	47.1044	122.123	287.706	156.291	262.101	92.0656	302.056	29.884	320.441	3.83342
															1.5	1587.95	24.4	61.1149	13.1508	0	1.4	75.6657		80.7696	17.3801	0	1.85025	100	0.0225902	0.173322	0.0983412	0.129366	0.0804462	0.0502505	0.0315181		9.15023	3269.86	36.8172	47.0623	120.96	287.023	155.286	261.663	90.9246	301.191	29.2312	319.247	3.69304
															1.5	1588.66	24.5	61.1222	13.0435	0	1.4	75.5657		80.8862	17.2611	0	1.85269	100	0.0225344	0.172948	0.0980959	0.129055	0.0802406	0.0501153	0.0314295		8.66926	3256.55	36.6649	47.0198	119.804	286.341	154.282	261.225	89.7934	300.328	28.5901	318.061	3.55725
															1.5	1589.38	24.6	61.1295	12.9362	0	1.4	75.4657		81.003	17.1418	0	1.85515	100	0.0224785	0.172572	0.09785	0.128742	0.0800345	0.0499797	0.0313406		8.21188	3243.34	36.5128	46.9771	118.654	285.659	153.282	260.786	88.6719	299.467	27.9605	316.881	3.42592
															1.5	1590.09	24.7	61.1368	12.8289	0	1.4	75.3657		81.1202	17.0222	0	1.85761	100	0.0224225	0.172196	0.0976033	0.128429	0.0798278	0.0498438	0.0312515		7.77702	3230.25	36.3607	46.9341	117.511	284.978	152.284	260.347	87.5601	298.61	27.3424	315.709	3.29892
															1.5	1590.8	24.8	61.1441	12.7216	0	1.4	75.2657		81.2377	16.9023	0	1.86008	100	0.0223663	0.171819	0.0973561	0.128115	0.0796206	0.0497076	0.0311622		7.36364	3217.25	36.2088	46.8909	116.374	284.298	151.29	259.907	86.458	297.754	26.7355	314.544	3.17613
															1.5	1591.52	24.9	61.1514	12.6143	0	1.4	75.1657		81.3555	16.782	0	1.86255	100	0.0223099	0.171441	0.0971081	0.1278	0.0794128	0.049571	0.0310726		6.97077	3204.36	36.0569	46.8474	115.245	283.619	150.298	259.467	85.3655	296.901	26.1396	313.386	3.05742
															1.5	1592.23	25	61.1587	12.507	0	1.4	75.0657		81.4736	16.6614	0	1.86503	100	0.0222534	0.171062	0.0968595	0.127485	0.0792045	0.049434	0.0309828		6.59747	3191.57	35.9052	46.8036	114.122	282.941	149.308	259.026	84.2826	296.051	25.5547	312.234	2.94267
															1.5	1592.95	25.1	61.166	12.3997	0	1.4	74.9657		81.592	16.5405	0	1.86752	100	0.0221968	0.170682	0.0966103	0.127168	0.0789956	0.0492966	0.0308928		6.24281	3178.88	35.7535	46.7596	113.005	282.264	148.322	258.585	83.2091	295.203	24.9806	311.09	2.83177
															1.5	1593.66	25.2	61.1733	12.2924	0	1.4	74.8657		81.7107	16.4193	0	1.87002	100	0.02214	0.170301	0.0963604	0.126851	0.0787861	0.0491589	0.0308025		5.90596	3166.28	35.602	46.7153	111.895	281.588	147.338	258.144	82.1452	294.357	24.417	309.952	2.7246
															1.5	1594.38	25.3	61.1806	12.1851	0	1.4	74.7657		81.8298	16.2977	0	1.87252	100	0.022083	0.169918	0.0961098	0.126533	0.0785761	0.0490208	0.030712		5.58606	3153.79	35.4506	46.6708	110.792	280.913	146.357	257.702	81.0906	293.514	23.8639	308.822	2.62106
															1.5	1595.09	25.4	61.1879	12.0778	0	1.4	74.6657		81.9492	16.1758	0	1.87503	100	0.0220259	0.169535	0.0958585	0.126214	0.0783656	0.0488823	0.0306212		5.28233	3141.4	35.2992	46.626	109.695	280.239	145.379	257.26	80.0455	292.674	23.3211	307.698	2.52103
															1.5	1595.8	25.5	61.1952	11.9705	0	1.4	74.5657		82.0688	16.0536	0	1.87754	100	0.0219687	0.169151	0.0956066	0.125894	0.0781544	0.0487435	0.0305302		4.99402	3129.1	35.148	46.581	108.605	279.566	144.404	256.817	79.0097	291.836	22.7885	306.58	2.42441
															1.5	1596.52	25.6	61.2025	11.8632	0	1.4	74.4657		82.1889	15.9311	0	1.88006	100	0.0219112	0.168766	0.095354	0.125573	0.0779427	0.0486043	0.0304389		4.72039	3116.89	34.9969	46.5358	107.522	278.894	143.431	256.374	77.9831	291.001	22.2659	305.47	2.3311
															1.5	1597.23	25.7	61.2098	11.7559	0	1.4	74.3657		82.3092	15.8082	0	1.88259	100	0.0218537	0.168379	0.0951007	0.125251	0.0777305	0.0484647	0.0303474		4.46076	3104.78	34.8459	46.4903	106.445	278.223	142.461	255.931	76.9658	290.168	21.7531	304.366	2.241
															1.5	1597.95	25.8	61.2171	11.6486	0	1.4	74.2657		82.4299	15.685	0	1.88512	100	0.021796	0.167992	0.0948467	0.124929	0.0775176	0.0483248	0.0302557		4.21445	3092.76	34.6949	46.4446	105.374	277.553	141.494	255.487	75.9577	289.337	21.25	303.268	2.15401
															1.5	1598.66	25.9	61.2244	11.5413	0	1.4	74.1657		82.5508	15.5615	0	1.88767	100	0.0217381	0.167603	0.094592	0.124605	0.0773042	0.0481844	0.0301637		3.98084	3080.84	34.5441	46.3986	104.31	276.884	140.53	255.043	74.9588	288.51	20.7565	302.178	2.07004
															1.5	1599.38	26	61.2317	11.434	0	1.4	74.0657		82.6722	15.4376	0	1.89021	100	0.02168	0.167214	0.0943367	0.124281	0.0770902	0.0480437	0.0300714		3.75931	3069	34.3934	46.3524	103.253	276.216	139.568	254.599	73.9689	287.685	20.2724	301.093	1.98899
															1.5	1600.09	26.1	61.239	11.3267	0	1.4	73.9657		82.7938	15.3134	0	1.89277	100	0.0216218	0.166824	0.0940807	0.123956	0.0768757	0.0479026	0.0299789		3.54929	3057.26	34.2428	46.306	102.202	275.55	138.61	254.155	72.9881	286.862	19.7977	300.016	1.91078
															1.5	1600.8	26.2	61.2463	11.2194	0	1.4	73.8657		82.9158	15.1889	0	1.89533	100	0.0215635	0.166432	0.0938239	0.12363	0.0766605	0.0477612	0.0298862		3.35023	3045.6	34.0923	46.2594	101.157	274.884	137.654	253.71	72.0164	286.042	19.332	298.944	1.83531
															1.5	1601.52	26.3	61.2536	11.1121	0	1.4	73.7657		83.0381	15.064	0	1.8979	100	0.021505	0.166039	0.0935665	0.123303	0.0764448	0.0476193	0.0297932		3.16158	3034.03	33.9419	46.2126	100.119	274.219	136.701	253.265	71.0535	285.225	18.8754	297.879	1.76251
															1.5	1602.23	26.4	61.2609	11.0048	0	1.4	73.6657		83.1607	14.9388	0	1.90048	100	0.0214463	0.165646	0.0933084	0.122975	0.0762285	0.0474771	0.0296999		2.98285	3022.55	33.7916	46.1655	99.0875	273.556	135.751	252.82	70.0996	284.41	18.4276	296.821	1.69229
															1.5	1602.95	26.5	61.2682	10.8975	0	1.4	73.5657		83.2837	14.8133	0	1.90306	100	0.0213875	0.165251	0.0930496	0.122647	0.0760116	0.0473344	0.0296064		2.81354	3011.16	33.6414	46.1183	98.0623	272.894	134.803	252.375	69.1546	283.597	17.9886	295.769	1.62457
															1.5	1603.66	26.6	61.2755	10.7902	0	1.4	73.4657		83.407	14.6874	0	1.90565	100	0.0213285	0.164855	0.09279	0.122317	0.0757941	0.0471914	0.0295127		2.65321	2999.85	33.4914	46.0708	97.0435	272.233	133.859	251.929	68.2184	282.788	17.5582	294.723	1.55927
															1.5	1604.38	26.7	61.2828	10.6829	0	1.4	73.3657		83.5306	14.5611	0	1.90825	100	0.0212694	0.164458	0.0925298	0.121987	0.075576	0.047048	0.0294186		2.50141	2988.62	33.3414	46.0231	96.0311	271.573	132.917	251.484	67.291	281.981	17.1362	293.683	1.49632
															1.5	1605.09	26.8	61.2901	10.5756	0	1.4	73.2657		83.6546	14.4345	0	1.91085	100	0.0212101	0.16406	0.0922688	0.121655	0.0753573	0.0469042	0.0293244		2.35771	2977.48	33.1915	45.9753	95.0251	270.914	131.978	251.038	66.3723	281.176	16.7226	292.65	1.43563
															1.5	1605.8	26.9	61.2974	10.4683	0	1.4	73.1657		83.7789	14.3076	0	1.91347	100	0.0211506	0.163661	0.0920072	0.121323	0.075138	0.04676	0.0292298		2.22172	2966.42	33.0418	45.9272	94.0255	270.256	131.042	250.592	65.4623	280.374	16.3172	291.622	1.37715
															1.5	1606.52	27	61.3047	10.361	0	1.4	73.0657		83.9036	14.1803	0	1.91608	100	0.021091	0.163261	0.0917448	0.12099	0.0749181	0.0466155	0.0291351		2.09306	2955.44	32.8921	45.8789	93.0322	269.6	130.108	250.145	64.561	279.575	15.9199	290.601	1.32079
															1.5	1607.23	27.1	61.312	10.2537	0	1.4	72.9657		84.0286	14.0527	0	1.91871	100	0.0210312	0.16286	0.0914817	0.120656	0.0746976	0.0464705	0.02904		1.97135	2944.54	32.7426	45.8304	92.0453	268.945	129.178	249.699	63.6683	278.778	15.5305	289.586	1.2665
															1.5	1607.95	27.2	61.3193	10.1464	0	1.4	72.8657		84.1539	13.9247	0	1.92134	100	0.0209712	0.162457	0.0912179	0.120321	0.0744765	0.0463251	0.0289447		1.85624	2933.72	32.5932	45.7818	91.0647	268.291	128.25	249.252	62.7841	277.984	15.149	288.577	1.2142
															1.5	1608.66	27.3	61.3266	10.0391	0	1.4	72.7657		84.2796	13.7964	0	1.92398	100	0.0209111	0.162054	0.0909533	0.119985	0.0742548	0.0461793	0.0288491		1.74741	2922.98	32.4439	45.7329	90.0905	267.638	127.326	248.806	61.9084	277.193	14.7752	287.574	1.16383
															1.5	1609.38	27.4	61.3339	9.93175	0	1.4	72.6657		84.4056	13.6677	0	1.92663	100	0.0208508	0.161649	0.0906881	0.119648	0.0740325	0.0460331	0.0287533		1.64454	2912.32	32.2947	45.6839	89.1225	266.987	126.404	248.359	61.0412	276.404	14.409	286.577	1.11533
															1.5	1610.09	27.5	61.3412	9.82445	0	1.4	72.5657		84.532	13.5387	0	1.92929	100	0.0207903	0.161244	0.0904221	0.11931	0.0738096	0.0458865	0.0286572		1.54732	2901.73	32.1456	45.6346	88.1608	266.336	125.484	247.912	60.1824	275.617	14.0502	285.586	1.06863
															1.5	1610.8	27.6	61.3485	9.71715	0	1.4	72.4657		84.6587	13.4093	0	1.93195	100	0.0207297	0.160837	0.0901553	0.118972	0.0735861	0.0457396	0.0285608		1.45546	2891.23	31.9966	45.5852	87.2055	265.687	124.568	247.465	59.332	274.834	13.6988	284.601	1.02368
															1.5	1611.52	27.7	61.3558	9.60985	0	1.4	72.3657		84.7858	13.2796	0	1.93462	100	0.0206689	0.160429	0.0898879	0.118632	0.0733619	0.0455922	0.0284642		1.3687	2880.79	31.8477	45.5356	86.2563	265.04	123.655	247.018	58.4899	274.053	13.3546	283.622	0.980424
															1.5	1612.23	27.8	61.3631	9.50255	0	1.4	72.2657		84.9132	13.1495	0	1.9373	100	0.020608	0.16002	0.0896196	0.118291	0.0731372	0.0454444	0.0283673		1.28676	2870.44	31.6989	45.4858	85.3135	264.393	122.744	246.571	57.6561	273.274	13.0176	282.649	0.938799
															1.5	1612.95	27.9	61.3704	9.39524	0	1.4	72.1657		85.041	13.019	0	1.93998	100	0.0205468	0.159609	0.0893507	0.11795	0.0729118	0.0452962	0.0282702		1.20941	2860.15	31.5503	45.4359	84.3768	263.748	121.836	246.124	56.8305	272.499	12.6875	281.681	0.898754
															1.5	1613.66	28	61.3777	9.28794	0	1.4	72.0657		85.1692	12.8882	0	1.94267	100	0.0204855	0.159198	0.089081	0.117607	0.0726857	0.0451475	0.0281727		1.1364	2849.94	31.4017	45.3858	83.4464	263.104	120.932	245.677	56.0131	271.725	12.3643	280.719	0.860236
															1.5	1614.38	28.1	61.385	9.18064	0	1.4	71.9657		85.2977	12.757	0	1.94537	100	0.0204241	0.158786	0.0888105	0.117264	0.0724591	0.0449985	0.028075		1.0675	2839.8	31.2533	45.3355	82.5222	262.461	120.03	245.23	55.2039	270.955	12.0479	279.763	0.823193
															1.5	1615.09	28.2	61.3923	9.07334	0	1.4	71.8657		85.4265	12.6254	0	1.94808	100	0.0203624	0.158372	0.0885393	0.11692	0.0722318	0.044849	0.027977		1.0025	2829.74	31.105	45.285	81.6042	261.82	119.13	244.783	54.4028	270.187	11.7382	278.813	0.787575
															1.5	1615.8	28.3	61.3996	8.96604	0	1.4	71.7657		85.5557	12.4935	0	1.95079	100	0.0203006	0.157957	0.0882674	0.116574	0.0720039	0.0446992	0.0278788		0.941198	2819.74	30.9568	45.2344	80.6923	261.18	118.234	244.336	53.6097	269.422	11.435	277.868	0.753336
															1.5	1616.52	28.4	61.4069	8.85874	0	1.4	71.6657		85.6853	12.3612	0	1.95352	100	0.0202386	0.157541	0.0879946	0.116228	0.0717753	0.0445489	0.0277803		0.883395	2809.81	30.8087	45.1836	79.7866	260.541	117.341	243.889	52.8247	268.659	11.1382	276.929	0.720427
															1.5	1617.23	28.5	61.4142	8.75144	0	1.4	71.5657		85.8152	12.2285	0	1.95625	100	0.0201765	0.157124	0.0877211	0.115881	0.0715461	0.0443982	0.0276815		0.828907	2799.96	30.6607	45.1326	78.8871	259.904	116.45	243.441	52.0476	267.899	10.8478	275.995	0.688803
															1.5	1617.95	28.6	61.4215	8.64413	0	1.4	71.4657		85.9455	12.0955	0	1.95898	100	0.0201141	0.156706	0.0874469	0.115532	0.0713163	0.0442471	0.0275824		0.777558	2790.17	30.5128	45.0815	77.9937	259.268	115.563	242.994	51.2784	267.142	10.5636	275.067	0.65842
															1.5	1618.66	28.7	61.4288	8.53683	0	1.4	71.3657		86.0762	11.9621	0	1.96173	100	0.0200516	0.156286	0.0871719	0.115183	0.0710858	0.0440955	0.027483		0.729179	2780.45	30.3651	45.0302	77.1065	258.633	114.678	242.547	50.5171	266.387	10.2856	274.144	0.629235
															1.5	1619.38	28.8	61.4361	8.42953	0	1.4	71.2657		86.2072	11.8283	0	1.96448	100	0.019989	0.155866	0.0868961	0.114833	0.0708547	0.0439435	0.0273834		0.68361	2770.8	30.2174	44.9788	76.2253	258	113.796	242.1	49.7637	265.635	10.0135	273.227	0.601206
															1.5	1620.09	28.9	61.4434	8.32223	0	1.4	71.1657		86.3386	11.6942	0	1.96724	100	0.0199261	0.155444	0.0866195	0.114482	0.0706229	0.0437911	0.0272835		0.640701	2761.21	30.0699	44.9272	75.3502	257.368	112.917	241.653	49.018	264.885	9.74741	272.316	0.574294
															1.5	1620.8	29	61.4507	8.21493	0	1.4	71.0657		86.4704	11.5596	0	1.97001	100	0.0198631	0.155021	0.0863422	0.11413	0.0703905	0.0436383	0.0271833		0.600307	2751.7	29.9225	44.8755	74.4812	256.737	112.041	241.206	48.2801	264.138	9.48711	271.409	0.548459
															1.5	1621.52	29.1	61.458	8.10763	0	1.4	70.9657		86.6025	11.4247	0	1.97279	100	0.0197998	0.154597	0.0860641	0.113776	0.0701574	0.043485	0.0270828		0.562291	2742.24	29.7752	44.8236	73.6183	256.108	111.168	240.759	47.5499	263.394	9.23254	270.508	0.523663
															1.5	1622.23	29.2	61.4653	8.00032	0	1.4	70.8657		86.735	11.2894	0	1.97557	100	0.0197365	0.154171	0.0857851	0.113422	0.0699237	0.0433313	0.0269821		0.526523	2732.85	29.6281	44.7716	72.7614	255.48	110.297	240.313	46.8274	262.652	8.98358	269.613	0.499869
															1.5	1622.95	29.3	61.4726	7.89302	0	1.4	70.7657		86.8679	11.1537	0	1.97836	100	0.0196729	0.153745	0.0855054	0.113067	0.0696893	0.0431772	0.026881		0.492881	2723.53	29.481	44.7194	71.9106	254.853	109.43	239.866	46.1124	261.913	8.74016	268.722	0.477041
															1.5	1623.66	29.4	61.4799	7.78572	0	1.4	70.6657		87.0012	11.0177	0	1.98116	100	0.0196091	0.153317	0.085225	0.112711	0.0694542	0.0430226	0.0267797		0.461245	2714.26	29.3341	44.667	71.0658	254.228	108.565	239.419	45.4051	261.177	8.50216	267.837	0.455146
															1.5	1624.38	29.5	61.4872	7.67842	0	1.4	70.5657		87.1348	10.8812	0	1.98397	100	0.0195452	0.152888	0.0849437	0.112354	0.0692185	0.0428676	0.0266781		0.431506	2705.07	29.1872	44.6146	70.227	253.605	107.704	238.973	44.7052	260.443	8.26949	266.957	0.43415
															1.5	1625.09	29.6	61.4945	7.57112	0	1.4	70.4657		87.2688	10.7444	0	1.98678	100	0.0194811	0.152458	0.0846616	0.111995	0.0689821	0.0427122	0.0265762		0.403558	2695.93	29.0405	44.5619	69.3942	252.982	106.845	238.526	44.0128	259.712	8.04206	266.083	0.414019
															1.5	1625.8	29.7	61.5018	7.46382	0	1.4	70.3657		87.4032	10.6072	0	1.98961	100	0.0194168	0.152026	0.0843787	0.111636	0.0687451	0.0425563	0.026474		0.3773	2686.85	28.8939	44.5092	68.5673	252.361	105.989	238.08	43.3279	258.983	7.81979	265.213	0.394723
															1.5	1626.52	29.8	61.5091	7.35651	0	1.4	70.2657		87.538	10.4696	0	1.99244	100	0.0193523	0.151594	0.084095	0.111276	0.0685073	0.0424	0.0263715		0.352639	2677.84	28.7475	44.4563	67.7464	251.742	105.137	237.634	42.6504	258.257	7.60256	264.349	0.376231
															1.5	1627.23	29.9	61.5164	7.24921	0	1.4	70.1657		87.6732	10.3316	0	1.99528	100	0.0192877	0.15116	0.0838105	0.110915	0.0682689	0.0422432	0.0262687		0.329482	2668.88	28.6011	44.4033	66.9315	251.124	104.287	237.188	41.9802	257.534	7.39031	263.489	0.358514
															1.5	1627.95	30	61.5237	7.14191	0	1.4	70.0657		87.8087	10.1932	0	1.99813	100	0.0192228	0.150725	0.0835252	0.110552	0.0680298	0.042086	0.0261656		0.307746	2659.99	28.4549	44.3501	66.1225	250.507	103.44	236.742	41.3173	256.813	7.18293	262.635	0.341543
															1.5	1628.66	30.1	61.531	7.03461	0	1.4	69.9657		87.9446	10.0544	0	2.00098	100	0.0191578	0.150288	0.0832391	0.110189	0.06779	0.0419283	0.0260623		0.287349	2651.15	28.3088	44.2968	65.3194	249.892	102.596	236.297	40.6616	256.095	6.98035	261.785	0.325291
															1.5	1629.38	30.2	61.5383	6.92731	0	1.4	69.8657		88.081	9.91518	0	2.00385	100	0.0190926	0.14985	0.0829521	0.109825	0.0675495	0.0417702	0.0259586		0.268215	2642.37	28.1628	44.2434	64.5223	249.278	101.754	235.851	40.0132	255.38	6.78246	260.941	0.30973
															1.5	1630.09	30.3	61.5456	6.82001	0	1.4	69.7657		88.2177	9.77559	0	2.00672	100	0.0190272	0.149412	0.0826644	0.109459	0.0673084	0.0416116	0.0258546		0.250271	2633.65	28.0169	44.1898	63.731	248.666	100.916	235.406	39.3719	254.667	6.5892	260.102	0.294834
															1.5	1630.8	30.4	61.5529	6.71271	0	1.4	69.6657		88.3548	9.6356	0	2.0096	100	0.0189616	0.148971	0.0823758	0.109093	0.0670665	0.0414526	0.0257504		0.233449	2624.99	27.8711	44.1362	62.9456	248.055	100.081	234.961	38.7378	253.956	6.40046	259.267	0.28058
															1.5	1631.52	30.5	61.5602	6.6054	0	1.4	69.5657		88.4923	9.49521	0	2.01249	100	0.0188958	0.14853	0.0820863	0.108725	0.066824	0.0412931	0.0256458		0.217683	2616.38	27.7255	44.0824	62.166	247.445	99.2487	234.516	38.1108	253.249	6.21618	258.437	0.266942
															1.5	1632.23	30.6	61.5676	6.4981	0	1.4	69.4657		88.6302	9.35441	0	2.01538	100	0.0188298	0.148087	0.0817961	0.108357	0.0665807	0.0411331	0.025541		0.202911	2607.83	27.58	44.0284	61.3923	246.837	98.4193	234.071	37.4908	252.544	6.03627	257.613	0.253896
															1.5	1632.95	30.7	61.5749	6.3908	0	1.4	69.3657		88.7685	9.21321	0	2.01829	100	0.0187637	0.147643	0.081505	0.107987	0.0663368	0.0409727	0.0254358		0.189076	2599.34	27.4346	43.9744	60.6244	246.231	97.5929	233.626	36.8778	251.841	5.86064	256.793	0.241421
															1.5	1633.66	30.8	61.5822	6.2835	0	1.4	69.2657		88.9072	9.07159	0	2.0212	100	0.0186973	0.147198	0.0812131	0.107616	0.0660921	0.0408119	0.0253303		0.176122	2590.9	27.2894	43.9202	59.8623	245.626	96.7695	233.182	36.2717	251.141	5.68922	255.977	0.229495
															1.5	1634.38	30.9	61.5895	6.1762	0	1.4	69.1657		89.0463	8.92957	0	2.02413	100	0.0186308	0.146752	0.0809203	0.107245	0.0658468	0.0406505	0.0252246		0.163997	2582.52	27.1442	43.8659	59.1061	245.022	95.949	232.738	35.6726	250.444	5.52193	255.167	0.218095
															1.5	1635.09	31	61.5968	6.0689	0	1.4	69.0657		89.1858	8.78714	0	2.02706	100	0.018564	0.146304	0.0806267	0.106872	0.0656007	0.0404887	0.0251185		0.152652	2574.19	26.9992	43.8115	58.3556	244.42	95.1315	232.294	35.0803	249.749	5.35868	254.361	0.207202
															1.5	1635.8	31.1	61.6041	5.96159	0	1.4	68.9657		89.3257	8.64429	0	2.03	100	0.0184971	0.145855	0.0803322	0.106498	0.0653539	0.0403264	0.0250121		0.14204	2565.91	26.8543	43.757	57.6109	243.819	94.3169	231.85	34.4948	249.057	5.19941	253.56	0.196795
															1.5	1636.52	31.2	61.6114	5.85429	0	1.4	68.8657		89.466	8.50103	0	2.03294	100	0.01843	0.145404	0.0800368	0.106123	0.0651064	0.0401637	0.0249054		0.132117	2557.69	26.7095	43.7023	56.8719	243.22	93.5053	231.407	33.9161	248.367	5.04404	252.763	0.186856
															1.5	1637.23	31.3	61.6187	5.74699	0	1.4	68.7657		89.6067	8.35736	0	2.0359	100	0.0183627	0.144952	0.0797407	0.105747	0.0648582	0.0400005	0.0247984		0.122842	2549.52	26.5649	43.6476	56.1387	242.622	92.6967	230.964	33.3442	247.68	4.89249	251.971	0.177366
															1.5	1637.95	31.4	61.626	5.63969	0	1.4	68.6657		89.7479	8.21326	0	2.03887	100	0.0182952	0.144499	0.0794436	0.10537	0.0646092	0.0398368	0.0246911		0.114176	2541.4	26.4204	43.5927	55.4112	242.026	91.8911	230.521	32.7789	246.996	4.74469	251.184	0.168307
															1.5	1638.66	31.5	61.6333	5.53239	0	1.4	68.5657		89.8894	8.06874	0	2.04184	100	0.0182275	0.144045	0.0791457	0.104991	0.0643596	0.0396726	0.0245835		0.10608	2533.33	26.276	43.5377	54.6894	241.431	91.0884	230.078	32.2203	246.314	4.60057	250.401	0.159663
															1.5	1639.38	31.6	61.6406	5.42509	0	1.4	68.4657		90.0314	7.92381	0	2.04482	100	0.0181595	0.143589	0.0788469	0.104612	0.0641092	0.039508	0.0244755		0.0985213	2525.31	26.1317	43.4827	53.9733	240.838	90.2888	229.636	31.6683	245.635	4.46005	249.623	0.151415
															1.5	1640.09	31.7	61.6479	5.31778	0	1.4	68.3657		90.1737	7.77844	0	2.04781	100	0.0180914	0.143132	0.0785472	0.104231	0.063858	0.0393428	0.0243673		0.0914656	2517.35	25.9876	43.4275	53.2629	240.246	89.4921	229.194	31.1228	244.958	4.32307	248.849	0.143549
															1.5	1640.8	31.8	61.6552	5.21048	0	1.4	68.2657		90.3165	7.63266	0	2.05081	100	0.0180231	0.142674	0.0782467	0.10385	0.0636062	0.0391772	0.0242587		0.084882	2509.43	25.8436	43.3722	52.5581	239.656	88.6984	228.752	30.5839	244.284	4.18955	248.08	0.136048
															1.5	1641.52	31.9	61.6625	5.10318	0	1.4	68.1657		90.4597	7.48644	0	2.05382	100	0.0179546	0.142214	0.0779452	0.103467	0.0633536	0.0390111	0.0241498		0.0787412	2501.56	25.6997	43.3168	51.859	239.067	87.9078	228.31	30.0514	243.613	4.05943	247.315	0.128898
															1.5	1642.23	32	61.6698	4.99588	0	1.4	68.0657		90.6034	7.3398	0	2.05684	100	0.0178859	0.141753	0.0776429	0.103083	0.0631002	0.0388445	0.0240406		0.0730156	2493.75	25.5559	43.2613	51.1655	238.48	87.1201	227.869	29.5254	242.944	3.93264	246.554	0.122084
															1.5	1642.95	32.1	61.6771	4.88858	0	1.4	67.9657		90.7474	7.19272	0	2.05986	100	0.017817	0.141291	0.0773397	0.102698	0.0628461	0.0386774	0.023931		0.067679	2485.98	25.4123	43.2057	50.4777	237.895	86.3354	227.428	29.0057	242.277	3.8091	245.798	0.115592
															1.5	1643.66	32.2	61.6844	4.78128	0	1.4	67.8657		90.8919	7.04521	0	2.0629	100	0.0177479	0.140827	0.0770356	0.102312	0.0625913	0.0385099	0.0238212		0.0627069	2478.26	25.2688	43.15	49.7954	237.31	85.5538	226.988	28.4924	241.613	3.68877	245.046	0.10941
															1.5	1644.38	32.3	61.6917	4.67398	0	1.4	67.7657		91.0368	6.89726	0	2.06594	100	0.0176786	0.140362	0.0767307	0.101925	0.0623357	0.0383418	0.023711		0.0580762	2470.59	25.1254	43.0942	49.1187	236.728	84.7752	226.547	27.9854	240.952	3.57156	244.298	0.103523
															1.5	1645.09	32.4	61.699	4.56667	0	1.4	67.6657		91.1821	6.74888	0	2.069	100	0.0176091	0.139895	0.0764248	0.101536	0.0620793	0.0381732	0.0236005		0.0537651	2462.96	24.9822	43.0383	48.4476	236.147	83.9995	226.107	27.4847	240.293	3.45742	243.555	0.0979198
															1.5	1645.8	32.5	61.7063	4.45937	0	1.4	67.5657		91.3279	6.60006	0	2.07206	100	0.0175393	0.139427	0.076118	0.101147	0.0618222	0.0380042	0.0234897		0.049753	2455.38	24.8391	42.9823	47.782	235.567	83.2269	225.668	26.9902	239.637	3.34629	242.816	0.092588
															1.5	1646.52	32.6	61.7136	4.35207	0	1.4	67.4657		91.4741	6.45079	0	2.07513	100	0.0174694	0.138958	0.0758103	0.100756	0.0615644	0.0378346	0.0233785		0.0460208	2447.85	24.6961	42.9262	47.122	234.989	82.4574	225.228	26.5018	238.983	3.2381	242.081	0.087516
															1.5	1647.23	32.7	61.7209	4.24477	0	1.4	67.3657		91.6207	6.30109	0	2.07821	100	0.0173992	0.138487	0.0755016	0.100364	0.0613057	0.0376645	0.023267		0.0425502	2440.37	24.5533	42.87	46.4675	234.412	81.6909	224.789	26.0196	238.332	3.13279	241.35	0.0826926
															1.5	1647.95	32.8	61.7282	4.13747	0	1.4	67.2657		91.7678	6.15094	0	2.0813	100	0.0173289	0.138015	0.0751921	0.0999708	0.0610463	0.037494	0.0231552		0.0393243	2432.93	24.4106	42.8137	45.8185	233.837	80.9274	224.351	25.5435	237.683	3.0303	240.624	0.0781072
															1.5	1648.66	32.9	61.7355	4.03017	0	1.4	67.1657		91.9153	6.00034	0	2.0844	100	0.0172583	0.137541	0.0748816	0.0995766	0.0607861	0.0373229	0.023043		0.0363269	2425.53	24.268	42.7573	45.175	233.264	80.1669	223.913	25.0734	237.037	2.93058	239.901	0.0737494
															1.5	1649.38	33	61.7428	3.92286	0	1.4	67.0657		92.0632	5.84929	0	2.08751	100	0.0171876	0.137067	0.0745702	0.0991812	0.0605252	0.0371513	0.0229305		0.0335431	2418.18	24.1255	42.7009	44.537	232.692	79.4095	223.475	24.6094	236.393	2.83356	239.183	0.0696092
															1.5	1650.09	33.1	61.7501	3.81556	0	1.4	66.9657		92.2116	5.69779	0	2.09062	100	0.0171166	0.13659	0.0742579	0.0987846	0.0602635	0.0369792	0.0228177		0.0309588	2410.88	23.9832	42.6443	43.9044	232.122	78.6552	223.037	24.1512	235.752	2.73918	238.469	0.0656771
															1.5	1650.8	33.2	61.7574	3.70826	0	1.4	66.8657		92.3604	5.54584	0	2.09375	100	0.0170454	0.136112	0.0739447	0.0983868	0.0600009	0.0368066	0.0227045		0.0285605	2403.61	23.8411	42.5877	43.2773	231.553	77.9039	222.6	23.699	235.113	2.64739	237.758	0.0619438
															1.5	1651.52	33.3	61.7647	3.60096	0	1.4	66.7657		92.5097	5.39343	0	2.09689	100	0.016974	0.135633	0.0736305	0.0979879	0.0597376	0.0366334	0.022591		0.0263359	2396.4	23.699	42.531	42.6556	230.986	77.1556	222.163	23.2527	234.477	2.55814	237.052	0.0584005
															1.5	1652.23	33.4	61.772	3.49366	0	1.4	66.6657		92.6594	5.24057	0	2.10003	100	0.0169024	0.135153	0.0733154	0.0975877	0.0594735	0.0364598	0.0224772		0.0242733	2389.22	23.5571	42.4742	42.0393	230.42	76.4104	221.727	22.8122	233.843	2.47137	236.35	0.0550387
															1.5	1652.95	33.5	61.7793	3.38636	0	1.4	66.5657		92.8096	5.08724	0	2.10319	100	0.0168305	0.134671	0.0729993	0.0971863	0.0592087	0.0362856	0.022363		0.0223617	2382.09	23.4153	42.4173	41.4284	229.856	75.6683	221.291	22.3775	233.212	2.38702	235.651	0.0518501
															1.5	1653.66	33.6	61.7866	3.27905	0	1.4	66.4657		92.9602	4.93346	0	2.10635	100	0.0167585	0.134187	0.0726822	0.0967838	0.058943	0.0361109	0.0222485		0.0205908	2375	23.2737	42.3603	40.8229	229.293	74.9293	220.855	21.9486	232.583	2.30505	234.957	0.0488269
															1.5	1654.38	33.7	61.7939	3.17175	0	1.4	66.3657		93.1113	4.77921	0	2.10952	100	0.0166862	0.133702	0.0723643	0.09638	0.0586765	0.0359357	0.0221336		0.0189511	2367.95	23.1322	42.3032	40.2227	228.732	74.1933	220.42	21.5254	231.957	2.22539	234.266	0.0459615
															1.5	1655.09	33.8	61.8012	3.06445	0	1.4	66.2657		93.2628	4.62449	0	2.11271	100	0.0166137	0.133216	0.0720453	0.095975	0.0584092	0.0357599	0.0220184		0.0174334	2360.95	22.9908	42.2461	39.6279	228.173	73.4605	219.985	21.1078	231.333	2.14801	233.579	0.0432467
															1.5	1655.8	33.9	61.8085	2.95715	0	1.4	66.1657		93.4148	4.46931	0	2.1159	100	0.016541	0.132728	0.0717254	0.0955687	0.0581411	0.0355836	0.0219028		0.0160294	2353.98	22.8496	42.1889	39.0384	227.615	72.7307	219.551	20.6958	230.712	2.07284	232.897	0.0406754
															1.5	1656.52	34	61.8158	2.84985	0	1.4	66.0657		93.5672	4.31366	0	2.1191	100	0.0164681	0.132238	0.0714045	0.0951613	0.0578722	0.0354068	0.0217869		0.0147311	2347.06	22.7085	42.1316	38.4543	227.058	72.004	219.117	20.2895	230.093	1.99984	232.217	0.0382411
															1.5	1657.23	34.1	61.8231	2.74255	0	1.4	65.9657		93.7201	4.15754	0	2.12232	100	0.0163949	0.131747	0.0710827	0.0947526	0.0576025	0.0352294	0.0216706		0.0135311	2340.18	22.5676	42.0742	37.8754	226.504	71.2804	218.683	19.8886	229.476	1.92895	231.542	0.0359372
															1.5	1657.95	34.2	61.8304	2.63524	0	1.4	65.8657		93.8735	4.00094	0	2.12554	100	0.0163215	0.131255	0.0707598	0.0943426	0.0573319	0.0350515	0.021554		0.0124225	2333.33	22.4268	42.0168	37.3018	225.95	70.5599	218.25	19.4933	228.862	1.86014	230.87	0.0337577
															1.5	1658.66	34.3	61.8377	2.52794	0	1.4	65.7657		94.0274	3.84387	0	2.12877	100	0.0162479	0.130761	0.070436	0.0939315	0.0570606	0.0348731	0.021437		0.0113989	2326.53	22.2861	41.9592	36.7335	225.399	69.8425	217.818	19.1034	228.251	1.79336	230.203	0.0316965
															1.5	1659.38	34.4	61.845	2.42064	0	1.4	65.6657		94.1817	3.68631	0	2.13201	100	0.0161741	0.130266	0.0701112	0.093519	0.0567884	0.0346941	0.0213197		0.0104541	2319.77	22.1456	41.9016	36.1704	224.849	69.1282	217.385	18.719	227.642	1.72854	229.538	0.029748
															1.5	1660.09	34.5	61.8523	2.31334	0	1.4	65.5657		94.3365	3.52828	0	2.13526	100	0.0161001	0.129769	0.0697855	0.0931053	0.0565154	0.0345146	0.021202		0.00958258	2313.04	22.0052	41.844	35.6126	224.3	68.417	216.954	18.3399	227.035	1.66566	228.878	0.0279069
															1.5	1660.8	34.6	61.8596	2.20604	0	1.4	65.4657		94.4917	3.36976	0	2.13853	100	0.0160258	0.12927	0.0694587	0.0926904	0.0562415	0.0343345	0.0210839		0.00877899	2306.36	21.865	41.7862	35.0599	223.753	67.709	216.522	17.9661	226.431	1.60467	228.221	0.0261678
															1.5	1661.52	34.7	61.8669	2.09874	0	1.4	65.3657		94.6474	3.21076	0	2.1418	100	0.0159513	0.128771	0.0691309	0.0922742	0.0559668	0.0341539	0.0209655		0.00803842	2299.71	21.7249	41.7284	34.5125	223.208	67.0041	216.091	17.5976	225.829	1.54552	227.568	0.0245257
															1.5	1662.23	34.8	61.8742	1.99144	0	1.4	65.2657		94.8036	3.05128	0	2.14508	100	0.0158766	0.128269	0.0688021	0.0918566	0.0556913	0.0339727	0.0208467		0.00735627	2293.1	21.585	41.6705	33.9702	222.664	66.3023	215.661	17.2344	225.229	1.48816	226.918	0.022976
															1.5	1662.95	34.9	61.8815	1.88413	0	1.4	65.1657		94.9603	2.8913	0	2.14837	100	0.0158016	0.127766	0.0684723	0.0914379	0.0554149	0.033791	0.0207276		0.00672827	2286.53	21.4452	41.6126	33.4331	222.122	65.6036	215.231	16.8764	224.632	1.43256	226.272	0.021514
															1.5	1663.66	35	61.8888	1.77683	0	1.4	65.0657		95.1175	2.73083	0	2.15167	100	0.0157265	0.127262	0.0681415	0.0910178	0.0551377	0.0336087	0.0206081		0.00615041	2280	21.3055	41.5546	32.9012	221.581	64.9081	214.802	16.5236	224.038	1.37867	225.63	0.0201353
															1.5	1664.38	35.1	61.8961	1.66953	0	1.4	64.9657		95.2751	2.56987	0	2.15498	100	0.015651	0.126755	0.0678097	0.0905964	0.0548596	0.0334258	0.0204882		0.00561898	2273.5	21.166	41.4965	32.3744	221.042	64.2157	214.372	16.1758	223.446	1.32645	224.991	0.0188358
															1.5	1665.09	35.2	61.9034	1.56223	0	1.4	64.8657		95.4333	2.40841	0	2.15831	100	0.0155754	0.126248	0.0674768	0.0901738	0.0545806	0.0332424	0.0203679		0.00513049	2267.05	21.0266	41.4383	31.8527	220.505	63.5265	213.944	15.8332	222.856	1.27587	224.355	0.0176115
															1.5	1665.8	35.3	61.9107	1.45493	0	1.4	64.7657		95.5919	2.24645	0	2.16164	100	0.0154995	0.125739	0.0671429	0.0897498	0.0543008	0.0330584	0.0202473		0.00468173	2260.62	20.8874	41.3801	31.3361	219.969	62.8404	213.516	15.4956	222.268	1.22687	223.723	0.0164584
															1.5	1666.52	35.4	61.918	1.34763	0	1.4	64.6657		95.751	2.08399	0	2.16498	100	0.0154234	0.125228	0.066808	0.0893245	0.0540202	0.0328739	0.0201263		0.00426969	2254.24	20.7483	41.3218	30.8245	219.435	62.1575	213.088	15.163	221.683	1.17943	223.094	0.015373
															1.5	1667.23	35.5	61.9253	1.24032	0	1.4	64.5657		95.9106	1.92103	0	2.16834	100	0.015347	0.124715	0.0664721	0.0888979	0.0537386	0.0326887	0.020005		0.00389157	2247.89	20.6094	41.2635	30.3181	218.902	61.4778	212.661	14.8353	221.101	1.1335	222.469	0.0143518
															1.5	1667.95	35.6	61.9326	1.13302	0	1.4	64.4657		96.0707	1.75756	0	2.1717	100	0.0152704	0.124201	0.0661351	0.08847	0.0534562	0.032503	0.0198832		0.00354478	2241.57	20.4706	41.2051	29.8167	218.371	60.8012	212.235	14.5126	220.52	1.08905	221.847	0.0133913
															1.5	1668.66	35.7	61.9399	1.02572	0	1.4	64.3657		96.2313	1.59358	0	2.17507	100	0.0151936	0.123686	0.0657971	0.0880407	0.0531729	0.0323168	0.0197611		0.0032269	2235.29	20.332	41.1466	29.3203	217.841	60.1278	211.809	14.1948	219.942	1.04603	221.229	0.0124884
															1.5	1669.38	35.8	61.9472	0.918419	0	1.4	64.2657		96.3924	1.4291	0	2.17846	100	0.0151165	0.123169	0.065458	0.0876102	0.0528888	0.0321299	0.0196386		0.00293569	2229.05	20.1935	41.0881	28.8289	217.313	59.4576	211.383	13.8817	219.367	1.00441	220.613	0.0116401
															1.5	1670.09	35.9	61.9545	0.811118	0	1.4	64.1657		96.554	1.2641	0	2.18185	100	0.0150392	0.12265	0.0651178	0.0871782	0.0526037	0.0319425	0.0195157		0.00266907	2222.84	20.0552	41.0295	28.3425	216.787	58.7906	210.958	13.5735	218.794	0.964163	220.002	0.0108435
															1.5	1670.8	36	61.9618	0.703816	0	1.4	64.0657		96.7162	1.09859	0	2.18526	100	0.0149617	0.122129	0.0647766	0.086745	0.0523178	0.0317544	0.0193925		0.00242511	2216.67	19.917	40.9708	27.8611	216.262	58.1267	210.533	13.2701	218.223	0.925243	219.393	0.0100957
															1.5	1671.52	36.1	61.9691	0.596515	0	1.4	63.9657		96.8788	0.932555	0	2.18867	100	0.0148839	0.121607	0.0644343	0.0863103	0.0520309	0.0315658	0.0192688		0.00220201	2210.53	19.779	40.9121	27.3846	215.739	57.4661	210.109	12.9713	217.654	0.88762	218.788	0.00939417
															1.5	1672.23	36.2	61.9764	0.489213	0	1.4	63.8657		97.0419	0.766003	0	2.1921	100	0.0148059	0.121084	0.064091	0.0858743	0.0517432	0.0313766	0.0191448		0.00199812	2204.42	19.6412	40.8534	26.9131	215.217	56.8087	209.686	12.6772	217.088	0.851259	218.186	0.00873632
															1.5	1672.95	36.3	61.9837	0.381912	0	1.4	63.7657		97.2055	0.59893	0	2.19554	100	0.0147276	0.120558	0.0637466	0.085437	0.0514545	0.0311868	0.0190203		0.00181189	2198.35	19.5034	40.7946	26.4465	214.697	56.1544	209.263	12.3878	216.524	0.816127	217.587	0.00811978
															1.5	1673.66	36.4	61.991	0.27461	0	1.4	63.6657		97.3697	0.431331	0	2.19899	100	0.0146491	0.120031	0.0634011	0.0849982	0.051165	0.0309964	0.0188955		0.00164191	2192.31	19.3659	40.7357	25.9848	214.179	55.5034	208.841	12.1029	215.962	0.782191	216.991	0.00754224
															1.5	1674.38	36.5	61.9983	0.167308	0	1.4	63.5657		97.5343	0.263206	0	2.20245	100	0.0145703	0.119503	0.0630545	0.0845581	0.0508745	0.0308054	0.0187703		0.00148685	2186.3	19.2285	40.6768	25.5281	213.662	54.8557	208.419	11.8226	215.403	0.749419	216.399	0.00700154
															1.5	1675.09	36.6	62.0056	0.0600068	0	1.4	63.4657		97.6995	0.09455	0	2.20592	100	0.0144913	0.118973	0.0627068	0.0841166	0.0505832	0.0306138	0.0186447		0.0013455	2180.33	19.0912	40.6178	25.0761	213.147	54.2111	207.997	11.5468	214.846	0.717781	215.81	0.00649559
[truncated: 23 more columns]

## Sheet: B-1 (Garnet Peridotite)
Sample No.	T	P	Ti	V			Stop Row	Ti	F	Row	V	fO2					Mineral assemblage and melting reaction for garnet-lherzolite were chosen from Walter (1998) and Lee et al., (2003).																	Wo# Opx	AlT Cpx	AlT Opx	Mineral compositions were chosen from Walter (1998).
							300											T(℃)	P(Gpa)							Ol	Opx	Cpx	Grt					4.65	0.214	0.186
																		1628.51	4.65666					DTi		0.008	0.0338813	0.125772	0.28	Kds of V, Ti and Sc in Grt are from http://earthref.org/GERM/.		The chemcial compositions of depleted mantle (DM) are from Salters and Stracke (2004)
																		Ol (%)	Opx	Cpx	Grt			DSc		0.12	0.374171	0.734392	1.7		Co (ppm)
																	Mineral assemblage for garnet-lherzolite	52.3	17.4	26.2	4.1			DV: FMQ	-1.21	0.0331941	0.269489	0.466989	1.48		V	Ti	Sc
																	Melting reaction for harzburgite	-0.03	-0.97					DV: FMQ	-1	0.0293009	0.245833	0.411023	1.48		79	798	16.3
																	Melting reaction for lherzolite	-0.09375	0.5625	-1.46875				DV: FMQ	0	0.0161764	0.158723	0.223803	1.48
																	Melting reaction for garnet-lherzolite	-0.0833333	0.190476	-0.809524	-0.297619			DV: FMQ	1	0.00893061	0.10248	0.121862	1.48
																								DV: FMQ	2	0.00493039	0.0661668	0.0663539	1.48
															P(Gpa)	T (℃)	F	Ol	Opx	Cpx	Grt	Sum		Ol corrected	Opx corrected	Cpx corrected	Grt corrected	Sum	DTi	DSc	DV: FMQ-2	DV: FMQ-1	DV: FMQ	DV: FMQ+1	DV: FMQ+2		Ti frac	Ti aggre	Sc frac	Sc aggre	V FMQ-2 frac	V FMQ-2 aggre	V FMQ-1 frac	V FMQ-1 aggre	V FMQ frac	V FMQ aggre	V FMQ+1 frac	V FMQ+1 aggre	V FMQ+2 frac
															3	1628.95	0.1	52.2917	17.419	26.119	4.07024	99.9		52.344	17.4365	26.1452	4.07431	100	0.0543867	0.389327	0.246759	0.225965	0.154957	0.114704	0.0917661		14421.9	14421.9	41.8016	41.8016	319.176	319.176	348.419	348.419	507.054	507.054	683.452	683.452	852.447
															3	1629.38	0.2	52.2833	17.4381	26.0381	4.04048	99.8		52.3881	17.473	26.0903	4.04857	100	0.0542615	0.388676	0.246235	0.225461	0.154518	0.114298	0.0913751		14207.6	14314.8	41.8059	41.8037	318.879	319.027	348.002	348.21	505.727	506.391	680.609	682.03	847.666
															3	1629.82	0.3	52.275	17.4571	25.9571	4.01071	99.7		52.4323	17.5097	26.0352	4.02278	100	0.054136	0.388023	0.24571	0.224956	0.154079	0.113891	0.0909833		13995.8	14208.4	41.8102	41.8059	318.582	318.879	347.584	348.002	504.398	505.726	677.764	680.608	842.886
															3	1630.25	0.4	52.2667	17.4762	25.8762	3.98095	99.6		52.4766	17.5464	25.9801	3.99694	100	0.0540103	0.387369	0.245184	0.22445	0.153638	0.113483	0.0905907		13786.4	14102.9	41.8145	41.808	318.284	318.73	347.166	347.793	503.067	505.061	674.918	679.186	838.109
															3	1630.69	0.5	52.2583	17.4952	25.7952	3.95119	99.5		52.5209	17.5832	25.9249	3.97105	100	0.0538843	0.386714	0.244656	0.223943	0.153197	0.113074	0.0901973		13579.4	13998.2	41.8188	41.8102	317.985	318.581	346.746	347.583	501.734	504.396	672.071	677.763	833.333
															3	1631.12	0.6	52.25	17.5143	25.7143	3.92143	99.4		52.5654	17.62	25.8695	3.9451	100	0.0537581	0.386058	0.244128	0.223435	0.152754	0.112664	0.0898032		13374.9	13894.3	41.8231	41.8123	317.686	318.432	346.326	347.374	500.4	503.73	669.223	676.34	828.559
															3	1631.56	0.7	52.2417	17.5333	25.6333	3.89167	99.3		52.6099	17.6569	25.814	3.9191	100	0.0536316	0.3854	0.243598	0.222926	0.152311	0.112253	0.0894082		13172.9	13791.3	41.8274	41.8145	317.386	318.282	345.905	347.164	499.064	503.063	666.375	674.916	823.787
															3	1631.99	0.8	52.2333	17.5524	25.5524	3.8619	99.2		52.6546	17.6939	25.7584	3.89305	100	0.0535048	0.384741	0.243068	0.222416	0.151867	0.111842	0.0890125		12973.2	13689	41.8318	41.8166	317.085	318.133	345.483	346.954	497.727	502.396	663.525	673.492	819.016
															3	1632.43	0.9	52.225	17.5714	25.4714	3.83214	99.1		52.6993	17.731	25.7028	3.86695	100	0.0533778	0.384081	0.242536	0.221905	0.151422	0.11143	0.0886159		12775.8	13587.5	41.8362	41.8188	316.784	317.983	345.06	346.743	496.388	501.729	660.673	672.068	814.248
															3	1632.86	1	52.2167	17.5905	25.3905	3.80238	99		52.7441	17.7682	25.6469	3.84079	100	0.0532506	0.383419	0.242003	0.221393	0.150977	0.111017	0.0882185		12580.9	13486.9	41.8405	41.821	316.482	317.833	344.636	346.533	495.047	501.061	657.821	670.643	809.481
															3	1633.3	1.1	52.2083	17.6095	25.3095	3.77262	98.9		52.789	17.8054	25.591	3.81458	100	0.0531231	0.382756	0.241469	0.22088	0.15053	0.110603	0.0878204		12388.2	13387	41.8449	41.8232	316.18	317.683	344.212	346.322	493.705	500.392	654.968	669.218	804.716
															3	1633.73	1.2	52.2	17.6286	25.2286	3.74286	98.8		52.834	17.8427	25.535	3.78832	100	0.0529953	0.382091	0.240934	0.220366	0.150082	0.110188	0.0874214		12197.9	13287.9	41.8493	41.8253	315.876	317.532	343.786	346.11	492.361	499.723	652.114	667.793	799.953
															3	1634.17	1.3	52.1917	17.6476	25.1476	3.7131	98.7		52.8791	17.8801	25.4788	3.762	100	0.0528673	0.381426	0.240398	0.219851	0.149634	0.109772	0.0870216		12009.8	13189.6	41.8537	41.8275	315.572	317.381	343.36	345.899	491.015	499.053	649.258	666.367	795.192
															3	1634.6	1.4	52.1833	17.6667	25.0667	3.68333	98.6		52.9243	17.9175	25.4226	3.73563	100	0.052739	0.380759	0.239861	0.219335	0.149184	0.109356	0.0866211		11824	13092	41.8582	41.8297	315.268	317.23	342.932	345.687	489.668	498.382	646.402	664.941	790.433
															3	1635.04	1.5	52.175	17.6857	24.9857	3.65357	98.5		52.9695	17.955	25.3662	3.70921	100	0.0526104	0.38009	0.239323	0.218817	0.148734	0.108939	0.0862197		11640.5	12995.3	41.8626	41.8319	314.962	317.079	342.504	345.475	488.318	497.712	643.544	663.514	785.675
															3	1635.47	1.6	52.1667	17.7048	24.9048	3.62381	98.4		53.0149	17.9926	25.3097	3.68273	100	0.0524816	0.37942	0.238784	0.218299	0.148283	0.108521	0.0858174		11459.2	12899.3	41.8671	41.8341	314.656	316.928	342.075	345.262	486.967	497.04	640.685	662.088	780.92
															3	1635.9	1.7	52.1583	17.7238	24.8238	3.59405	98.3		53.0604	18.0303	25.2531	3.6562	100	0.0523525	0.378749	0.238244	0.21778	0.147831	0.108102	0.0854144		11280.1	12804	41.8715	41.8363	314.35	316.776	341.645	345.049	485.615	496.368	637.825	660.66	776.166
															3	1636.34	1.8	52.15	17.7429	24.7429	3.56429	98.2		53.1059	18.0681	25.1964	3.62962	100	0.0522232	0.378077	0.237702	0.217259	0.147378	0.107682	0.0850106		11103.2	12709.5	41.876	41.8385	314.042	316.624	341.214	344.836	484.261	495.695	634.964	659.233	771.415
															3	1636.77	1.9	52.1417	17.7619	24.6619	3.53452	98.1		53.1515	18.1059	25.1396	3.60298	100	0.0520936	0.377403	0.23716	0.216738	0.146924	0.107261	0.0846059		10928.5	12615.8	41.8805	41.8407	313.734	316.472	340.782	344.623	482.904	495.022	632.102	657.805	766.665
															3	1637.21	2	52.1333	17.781	24.581	3.50476	98		53.1973	18.1438	25.0826	3.57629	100	0.0519637	0.376727	0.236616	0.216215	0.146469	0.10684	0.0842004		10755.9	12522.8	41.885	41.8429	313.425	316.32	340.349	344.409	481.547	494.348	629.238	656.377	761.918
															3	1637.64	2.1	52.125	17.8	24.5	3.475	97.9		53.2431	18.1818	25.0255	3.54954	100	0.0518336	0.376051	0.236071	0.215692	0.146013	0.106417	0.0837941		10585.4	12430.5	41.8895	41.8451	313.115	316.167	339.915	344.195	480.187	493.674	626.374	654.948	757.172
															3	1638.08	2.2	52.1167	17.819	24.419	3.44524	97.8		53.289	18.2199	24.9684	3.52274	100	0.0517032	0.375373	0.235525	0.215167	0.145556	0.105994	0.0833869		10417.1	12339	41.894	41.8474	312.805	316.014	339.481	343.981	478.826	492.999	623.508	653.519	752.428
															3	1638.51	2.3	52.1083	17.8381	24.3381	3.41548	97.7		53.335	18.258	24.911	3.49588	100	0.0515725	0.374693	0.234978	0.214641	0.145098	0.10557	0.0829789		10250.9	12248.2	41.8986	41.8496	312.494	315.861	339.045	343.766	477.462	492.324	620.641	652.089	747.686
															3	1638.95	2.4	52.1	17.8571	24.2571	3.38571	97.6		53.3811	18.2963	24.8536	3.46897	100	0.0514416	0.374012	0.23443	0.214114	0.14464	0.105145	0.0825701		10086.7	12158.2	41.9032	41.8518	312.182	315.708	338.608	343.551	476.098	491.647	617.773	650.659	742.947
															3	1639.38	2.5	52.0917	17.8762	24.1762	3.35595	97.5		53.4274	18.3346	24.7961	3.442	100	0.0513104	0.37333	0.233881	0.213587	0.14418	0.104719	0.0821604		9924.62	12068.8	41.9077	41.8541	311.87	315.554	338.171	343.336	474.731	490.971	614.904	649.229	738.209
															3	1639.82	2.6	52.0833	17.8952	24.0952	3.32619	97.4		53.4736	18.3729	24.7384	3.41498	100	0.0511789	0.372646	0.233331	0.213058	0.143719	0.104293	0.0817499		9764.56	11980.2	41.9123	41.8563	311.556	315.401	337.732	343.121	473.362	490.294	612.034	647.799	733.473
															3	1640.25	2.7	52.075	17.9143	24.0143	3.29643	97.3		53.52	18.4114	24.6807	3.3879	100	0.0510472	0.371961	0.232779	0.212527	0.143258	0.103865	0.0813385		9606.51	11892.3	41.9169	41.8586	311.242	315.247	337.293	342.905	471.992	489.616	609.162	646.368	728.739
															3	1640.69	2.8	52.0667	17.9333	23.9333	3.26667	97.2		53.5665	18.4499	24.6228	3.36077	100	0.0509152	0.371275	0.232226	0.211996	0.142795	0.103436	0.0809263		9450.48	11805.1	41.9215	41.8608	310.928	315.092	336.852	342.689	470.62	488.937	606.289	644.936	724.008
															3	1641.12	2.9	52.0583	17.9524	23.8524	3.2369	97.1		53.6131	18.4885	24.5648	3.33358	100	0.0507829	0.370587	0.231673	0.211464	0.142332	0.103007	0.0805133		9296.42	11718.6	41.9262	41.8631	310.612	314.938	336.411	342.472	469.246	488.258	603.415	643.505	719.278
															3	1641.56	3	52.05	17.9714	23.7714	3.20714	97		53.6598	18.5272	24.5066	3.30633	100	0.0506503	0.369898	0.231118	0.210931	0.141868	0.102577	0.0800994		9144.33	11632.8	41.9308	41.8653	310.296	314.783	335.968	342.255	467.87	487.579	600.54	642.072	714.55
															3	1641.99	3.1	52.0417	17.9905	23.6905	3.17738	96.9		53.7066	18.566	24.4484	3.27903	100	0.0505175	0.369207	0.230562	0.210396	0.141402	0.102146	0.0796846		8994.19	11547.7	41.9355	41.8676	309.979	314.628	335.525	342.038	466.492	486.898	597.664	640.64	709.825
															3	1642.43	3.2	52.0333	18.0095	23.6095	3.14762	96.8		53.7534	18.6049	24.39	3.25167	100	0.0503844	0.368515	0.230004	0.209861	0.140936	0.101714	0.079269		8845.98	11463.2	41.9401	41.8698	309.661	314.473	335.08	341.821	465.112	486.218	594.786	639.207	705.102
															3	1642.86	3.3	52.025	18.0286	23.5286	3.11786	96.7		53.8004	18.6438	24.3315	3.22426	100	0.050251	0.367821	0.229446	0.209324	0.140469	0.101281	0.0788525		8699.68	11379.5	41.9448	41.8721	309.342	314.318	334.635	341.603	463.731	485.536	591.907	637.774	700.38
															3	1643.3	3.4	52.0167	18.0476	23.4476	3.0881	96.6		53.8475	18.6828	24.2729	3.19679	100	0.0501174	0.367126	0.228887	0.208786	0.140001	0.100847	0.0784352		8555.28	11296.4	41.9495	41.8744	309.023	314.162	334.189	341.385	462.347	484.854	589.027	636.34	695.661
															3	1643.73	3.5	52.0083	18.0667	23.3667	3.05833	96.5		53.8946	18.7219	24.2142	3.16926	100	0.0499834	0.36643	0.228326	0.208247	0.139531	0.100412	0.078017		8412.75	11214	41.9542	41.8767	308.703	314.006	333.741	341.167	460.962	484.171	586.146	634.906	690.944
															3	1644.17	3.6	52	18.0857	23.2857	3.02857	96.4		53.9419	18.7611	24.1553	3.14167	100	0.0498492	0.365732	0.227764	0.207707	0.139061	0.0999766	0.0775979		8272.08	11132.3	41.959	41.879	308.382	313.85	333.293	340.948	459.575	483.488	583.263	633.471	686.229
															3	1644.6	3.7	51.9917	18.1048	23.2048	2.99881	96.3		53.9893	18.8004	24.0963	3.11403	100	0.0497147	0.365033	0.227201	0.207166	0.13859	0.09954	0.077178		8133.25	11051.3	41.9637	41.8812	308.06	313.693	332.843	340.729	458.185	482.804	580.38	632.036	681.516
															3	1645.04	3.8	51.9833	18.1238	23.1238	2.96905	96.2		54.0367	18.8397	24.0372	3.08633	100	0.04958	0.364332	0.226637	0.206624	0.138118	0.0991026	0.0767572		7996.25	10970.9	41.9685	41.8835	307.738	313.536	332.393	340.509	456.794	482.12	577.494	630.601	676.805
															3	1645.47	3.9	51.975	18.1429	23.0429	2.93929	96.1		54.0843	18.8791	23.978	3.05857	100	0.0494449	0.36363	0.226071	0.20608	0.137645	0.0986643	0.0763355		7861.05	10891.1	41.9732	41.8858	307.415	313.379	331.941	340.29	455.401	481.435	574.608	629.165	672.097
															3	1645.9	4	51.9667	18.1619	22.9619	2.90952	96		54.1319	18.9187	23.9187	3.03075	100	0.0493096	0.362926	0.225505	0.205536	0.137171	0.098225	0.0759129		7727.65	10812	41.978	41.8881	307.091	313.222	331.489	340.07	454.006	480.749	571.72	627.729	667.391
															3	1646.34	4.1	51.9583	18.181	22.881	2.87976	95.9		54.1797	18.9582	23.8592	3.00288	100	0.049174	0.362221	0.224937	0.20499	0.136696	0.0977848	0.0754895		7596.01	10733.6	41.9828	41.8905	306.766	313.065	331.035	339.849	452.609	480.063	568.831	626.293	662.687
															3	1646.77	4.2	51.95	18.2	22.8	2.85	95.8		54.2276	18.9979	23.7996	2.97495	100	0.0490381	0.361514	0.224368	0.204443	0.13622	0.0973437	0.0750651		7466.13	10655.8	41.9876	41.8928	306.44	312.907	330.58	339.629	451.21	479.376	565.941	624.856	657.985
															3	1647.21	4.3	51.9417	18.219	22.719	2.82024	95.7		54.2755	19.0377	23.7399	2.94696	100	0.0489019	0.360806	0.223798	0.203895	0.135743	0.0969017	0.0746399		7337.99	10578.6	41.9925	41.8951	306.113	312.749	330.124	339.408	449.809	478.688	563.05	623.418	653.285
															3	1647.64	4.4	51.9333	18.2381	22.6381	2.79048	95.6		54.3236	19.0775	23.68	2.91891	100	0.0487654	0.360096	0.223227	0.203346	0.135265	0.0964588	0.0742138		7211.58	10502.1	41.9973	41.8974	305.786	312.591	329.668	339.186	448.406	478	560.157	621.981	648.588
															3	1648.08	4.5	51.925	18.2571	22.5571	2.76071	95.5		54.3717	19.1174	23.62	2.8908	100	0.0486287	0.359385	0.222654	0.202796	0.134785	0.0960149	0.0737868		7086.86	10426.2	42.0022	41.8997	305.458	312.432	329.21	338.965	447.001	477.311	557.262	620.542	643.892
															3	1648.51	4.6	51.9167	18.2762	22.4762	2.73095	95.4		54.42	19.1574	23.5599	2.86263	100	0.0484916	0.358673	0.222081	0.202245	0.134305	0.0955701	0.0733589		6963.84	10351	42.0071	41.9021	305.129	312.274	328.751	338.743	445.594	476.622	554.367	619.104	639.199
															3	1648.95	4.7	51.9083	18.2952	22.3952	2.70119	95.3		54.4683	19.1975	23.4997	2.83441	100	0.0483543	0.357959	0.221506	0.201692	0.133824	0.0951244	0.0729301		6842.49	10276.3	42.012	41.9044	304.799	312.114	328.291	338.52	444.185	475.931	551.47	617.665	634.509
															3	1649.38	4.8	51.9	18.3143	22.3143	2.67143	95.2		54.5168	19.2377	23.4394	2.80612	100	0.0482167	0.357243	0.22093	0.201139	0.133342	0.0946777	0.0725004		6722.79	10202.3	42.0169	41.9068	304.468	311.955	327.829	338.297	442.774	475.241	548.572	616.225	629.821
															3	1649.82	4.9	51.8917	18.3333	22.2333	2.64167	95.1		54.5654	19.278	23.3789	2.77778	100	0.0480788	0.356526	0.220352	0.200584	0.132859	0.0942301	0.0720698		6604.74	10128.9	42.0218	41.9091	304.137	311.796	327.367	338.074	441.36	474.549	545.672	614.786	625.134
															3	1650.25	5	51.8833	18.3524	22.1524	2.6119	95		54.614	19.3183	23.3183	2.74937	100	0.0479406	0.355807	0.219774	0.200028	0.132375	0.0937816	0.0716383		6488.3	10056	42.0267	41.9115	303.804	311.636	326.904	337.851	439.945	473.857	542.771	613.345	620.451
															3	1650.69	5.1	51.875	18.3714	22.0714	2.58214	94.9		54.6628	19.3587	23.2576	2.72091	100	0.0478021	0.355087	0.219194	0.19947	0.13189	0.0933321	0.0712059		6373.48	9983.83	42.0317	41.9138	303.471	311.476	326.439	337.627	438.528	473.164	539.869	611.905	615.769
															3	1651.12	5.2	51.8667	18.3905	21.9905	2.55238	94.8		54.7117	19.3992	23.1967	2.69238	100	0.0476634	0.354366	0.218613	0.198912	0.131404	0.0928816	0.0707726		6260.25	9912.23	42.0367	41.9162	303.137	311.315	325.974	337.403	437.108	472.471	536.965	610.463	611.09
															3	1651.56	5.3	51.8583	18.4095	21.9095	2.52262	94.7		54.7606	19.4398	23.1357	2.6638	100	0.0475243	0.353643	0.218031	0.198352	0.130917	0.0924302	0.0703383		6148.59	9841.21	42.0417	41.9185	302.802	311.155	325.507	337.179	435.686	471.777	534.06	609.022	606.414
															3	1651.99	5.4	51.85	18.4286	21.8286	2.49286	94.6		54.8097	19.4805	23.0746	2.63516	100	0.0473849	0.352918	0.217448	0.197792	0.130428	0.0919779	0.0699032		6038.49	9770.79	42.0467	41.9209	302.466	310.994	325.039	336.954	434.262	471.082	531.154	607.58	601.739
															3	1652.43	5.5	51.8417	18.4476	21.7476	2.4631	94.5		54.8589	19.5213	23.0134	2.60645	100	0.0472453	0.352192	0.216863	0.19723	0.129939	0.0915246	0.0694671		5929.93	9700.96	42.0517	41.9233	302.129	310.833	324.57	336.729	432.836	470.387	528.246	606.137	597.068
															3	1652.86	5.6	51.8333	18.4667	21.6667	2.43333	94.4		54.9082	19.5621	22.952	2.57768	100	0.0471053	0.351464	0.216277	0.196667	0.129449	0.0910703	0.0690301		5822.9	9631.71	42.0567	41.9257	301.792	310.671	324.1	336.503	431.408	469.691	525.336	604.694	592.398
															3	1653.3	5.7	51.825	18.4857	21.5857	2.40357	94.3		54.9576	19.6031	22.8905	2.54886	100	0.0469651	0.350735	0.21569	0.196102	0.128958	0.0906151	0.0685922		5717.39	9563.04	42.0618	41.9281	301.453	310.509	323.628	336.277	429.978	468.994	522.426	603.251	587.731
															3	1653.73	5.8	51.8167	18.5048	21.5048	2.37381	94.2		55.0071	19.6441	22.8288	2.51997	100	0.0468245	0.350004	0.215101	0.195537	0.128465	0.0901589	0.0681533		5613.37	9494.94	42.0669	41.9305	301.114	310.347	323.156	336.051	428.546	468.297	519.513	601.807	583.067
															3	1654.17	5.9	51.8083	18.5238	21.4238	2.34405	94.1		55.0567	19.6852	22.7671	2.49102	100	0.0466837	0.349271	0.214512	0.19497	0.127972	0.0897017	0.0677135		5510.84	9427.41	42.0719	41.9329	300.773	310.185	322.682	335.824	427.111	467.599	516.6	600.363	578.405
															3	1654.6	6	51.8	18.5429	21.3429	2.31429	94		55.1064	19.7264	22.7052	2.46201	100	0.0465425	0.348537	0.213921	0.194402	0.127477	0.0892436	0.0672728		5409.77	9360.45	42.0771	41.9353	300.432	310.023	322.207	335.597	425.674	466.9	513.685	598.919	573.745
															3	1655.04	6.1	51.7917	18.5619	21.2619	2.28452	93.9		55.1562	19.7677	22.6431	2.43293	100	0.0464011	0.347802	0.213329	0.193833	0.126982	0.0887845	0.0668311		5310.15	9294.05	42.0822	41.9377	300.09	309.86	321.731	335.37	424.235	466.2	510.768	597.473	569.088
															3	1655.47	6.2	51.7833	18.581	21.181	2.25476	93.8		55.2061	19.8091	22.581	2.4038	100	0.0462593	0.347065	0.212735	0.193263	0.126485	0.0883244	0.0663885		5211.97	9228.21	42.0873	41.9401	299.747	309.697	321.254	335.142	422.793	465.5	507.85	596.028	564.433
															3	1655.9	6.3	51.775	18.6	21.1	2.225	93.7		55.2561	19.8506	22.5187	2.3746	100	0.0461173	0.346326	0.212141	0.192691	0.125988	0.0878633	0.065945		5115.22	9162.93	42.0925	41.9425	299.403	309.533	320.775	334.914	421.35	464.8	504.931	594.582	559.781
															3	1656.34	6.4	51.7667	18.619	21.019	2.19524	93.6		55.3063	19.8921	22.4562	2.34534	100	0.0459749	0.345586	0.211545	0.192118	0.125489	0.0874013	0.0655004		5019.87	9098.19	42.0977	41.9449	299.058	309.37	320.296	334.686	419.904	464.098	502.01	593.136	555.132
															3	1656.77	6.5	51.7583	18.6381	20.9381	2.16548	93.5		55.3565	19.9338	22.3937	2.31602	100	0.0458322	0.344844	0.210948	0.191544	0.124989	0.0869382	0.065055		4925.91	9034	42.1028	41.9474	298.712	309.206	319.815	334.457	418.455	463.396	499.087	591.689	550.485
															3	1657.21	6.6	51.75	18.6571	20.8571	2.13571	93.4		55.4069	19.9755	22.331	2.28663	100	0.0456893	0.344101	0.210349	0.190969	0.124488	0.0864742	0.0646086		4833.33	8970.36	42.1081	41.9498	298.365	309.041	319.333	334.228	417.005	462.693	496.163	590.241	545.84
															3	1657.64	6.7	51.7417	18.6762	20.7762	2.10595	93.3		55.4573	20.0174	22.2682	2.25718	100	0.045546	0.343356	0.209749	0.190392	0.123986	0.0860092	0.0641612		4742.11	8907.25	42.1133	41.9522	298.017	308.877	318.849	333.998	415.552	461.989	493.237	588.793	541.199
															3	1658.08	6.8	51.7333	18.6952	20.6952	2.07619	93.2		55.5079	20.0593	22.2052	2.22767	100	0.0454024	0.342609	0.209148	0.189815	0.123483	0.0855431	0.0637129		4652.24	8844.67	42.1185	41.9547	297.669	308.712	318.365	333.769	414.097	461.285	490.31	587.345	536.56
															3	1658.51	6.9	51.725	18.7143	20.6143	2.04643	93.1		55.5585	20.1013	22.1421	2.1981	100	0.0452585	0.341861	0.208546	0.189236	0.122979	0.0850761	0.0632636		4563.7	8782.63	42.1238	41.9571	297.319	308.547	317.879	333.538	412.639	460.58	487.382	585.896	531.923
															3	1658.95	7	51.7167	18.7333	20.5333	2.01667	93		55.6093	20.1434	22.0789	2.16846	100	0.0451143	0.341111	0.207942	0.188656	0.122474	0.0846081	0.0628134		4476.48	8721.11	42.1291	41.9596	296.968	308.382	317.391	333.308	411.179	459.874	484.451	584.447	527.289
															3	1659.38	7.1	51.7083	18.7524	20.4524	1.9869	92.9		55.6602	20.1856	22.0155	2.13876	100	0.0449698	0.34036	0.207337	0.188074	0.121968	0.084139	0.0623621		4390.57	8660.12	42.1344	41.962	296.616	308.216	316.903	333.077	409.717	459.168	481.52	582.998	522.658
															3	1659.82	7.2	51.7	18.7714	20.3714	1.95714	92.8		55.7112	20.2278	21.952	2.10899	100	0.044825	0.339607	0.206731	0.187491	0.121461	0.083669	0.0619099		4305.96	8599.65	42.1397	41.9645	296.264	308.05	316.413	332.845	408.252	458.461	478.586	581.547	518.03
															3	1660.25	7.3	51.6917	18.7905	20.2905	1.92738	92.7		55.7623	20.2702	21.8883	2.07916	100	0.0446799	0.338852	0.206123	0.186907	0.120952	0.0831979	0.0614568		4222.61	8539.69	42.145	41.967	295.91	307.884	315.922	332.613	406.785	457.753	475.651	580.097	513.404
															3	1660.69	7.4	51.6833	18.8095	20.2095	1.89762	92.6		55.8135	20.3127	21.8245	2.04926	100	0.0445344	0.338096	0.205514	0.186322	0.120443	0.0827258	0.0610026		4140.54	8480.24	42.1504	41.9695	295.555	307.717	315.43	332.381	405.315	457.044	472.715	578.646	508.782
															3	1661.12	7.5	51.675	18.8286	20.1286	1.86786	92.5		55.8649	20.3552	21.7606	2.01931	100	0.0443887	0.337338	0.204904	0.185736	0.119932	0.0822527	0.0605475		4059.71	8421.3	42.1558	41.9719	295.2	307.55	314.936	332.149	403.843	456.335	469.776	577.194	504.161
															3	1661.56	7.6	51.6667	18.8476	20.0476	1.8381	92.4		55.9163	20.3979	21.6966	1.98928	100	0.0442426	0.336578	0.204293	0.185148	0.11942	0.0817786	0.0600914		3980.12	8362.86	42.1612	41.9744	294.843	307.383	314.442	331.916	402.368	455.625	466.837	575.742	499.544
															3	1661.99	7.7	51.6583	18.8667	19.9667	1.80833	92.3		55.9679	20.4406	21.6324	1.95919	100	0.0440962	0.335817	0.20368	0.184559	0.118908	0.0813034	0.0596343		3901.75	8304.93	42.1666	41.9769	294.485	307.215	313.945	331.682	400.891	454.914	463.895	574.289	494.93
															3	1662.43	7.8	51.65	18.8857	19.8857	1.77857	92.2		56.0195	20.4834	21.568	1.92904	100	0.0439495	0.335054	0.203066	0.183969	0.118394	0.0808272	0.0591762		3824.58	8247.49	42.172	41.9794	294.127	307.048	313.448	331.448	399.412	454.202	460.952	572.836	490.318
															3	1662.86	7.9	51.6417	18.9048	19.8048	1.74881	92.1		56.0713	20.5263	21.5035	1.89882	100	0.0438025	0.334289	0.20245	0.183377	0.117878	0.08035	0.0587171		3748.62	8190.54	42.1775	41.9819	293.767	306.879	312.949	331.214	397.93	453.49	458.007	571.383	485.709
															3	1663.3	8	51.6333	18.9238	19.7238	1.71905	92		56.1232	20.5694	21.4389	1.86853	100	0.0436551	0.333523	0.201833	0.182784	0.117362	0.0798717	0.058257		3673.84	8134.08	42.1829	41.9844	293.406	306.711	312.449	330.98	396.445	452.777	455.061	569.929	481.103
															3	1663.73	8.1	51.625	18.9429	19.6429	1.68929	91.9		56.1752	20.6125	21.3742	1.83818	100	0.0435075	0.332755	0.201215	0.18219	0.116845	0.0793924	0.0577959		3600.22	8078.11	42.1884	41.987	293.044	306.542	311.947	330.745	394.958	452.063	452.113	568.474	476.5
															3	1664.17	8.2	51.6167	18.9619	19.5619	1.65952	91.8		56.2273	20.6557	21.3093	1.80776	100	0.0433595	0.331986	0.200596	0.181595	0.116327	0.0789121	0.0573338		3527.76	8022.61	42.1939	41.9895	292.681	306.373	311.444	330.509	393.468	451.349	449.163	567.019	471.9
															3	1664.6	8.3	51.6083	18.981	19.481	1.62976	91.7		56.2795	20.699	21.2442	1.77728	100	0.0432112	0.331215	0.199975	0.180998	0.115807	0.0784307	0.0568707		3456.45	7967.6	42.1994	41.992	292.318	306.204	310.94	330.274	391.976	450.633	446.211	565.564	467.303
															3	1665.04	8.4	51.6	19	19.4	1.6	91.6		56.3319	20.7424	21.179	1.74672	100	0.0430625	0.330442	0.199352	0.1804	0.115286	0.0779482	0.0564066		3386.26	7913.06	42.205	41.9946	291.952	306.034	310.434	330.037	390.481	449.917	443.258	564.108	462.709
															3	1665.47	8.5	51.5917	19.019	19.319	1.57024	91.5		56.3843	20.7858	21.1137	1.71611	100	0.0429136	0.329667	0.198729	0.1798	0.114764	0.0774647	0.0559415		3317.19	7858.99	42.2106	41.9971	291.586	305.864	309.927	329.801	388.983	449.2	440.303	562.651	458.118
															3	1665.9	8.6	51.5833	19.0381	19.2381	1.54048	91.4		56.4369	20.8294	21.0482	1.68542	100	0.0427643	0.328891	0.198104	0.1792	0.114242	0.0769802	0.0554753		3249.22	7805.39	42.2162	41.9996	291.219	305.694	309.418	329.564	387.483	448.483	437.346	561.194	453.53
															3	1666.34	8.7	51.575	19.0571	19.1571	1.51071	91.3		56.4896	20.8731	20.9826	1.65467	100	0.0426147	0.328113	0.197478	0.178598	0.113717	0.0764946	0.0550082		3182.35	7752.25	42.2218	42.0022	290.851	305.523	308.908	329.326	385.98	447.764	434.387	559.737	448.945
															3	1666.77	8.8	51.5667	19.0762	19.0762	1.48095	91.2		56.5424	20.9169	20.9169	1.62385	100	0.0424647	0.327333	0.19685	0.177994	0.113192	0.0760079	0.05454		3116.55	7699.57	42.2274	42.0048	290.481	305.352	308.397	329.088	384.474	447.045	431.427	558.279	444.363
															3	1667.21	8.9	51.5583	19.0952	18.9952	1.45119	91.1		56.5953	20.9607	20.851	1.59296	100	0.0423144	0.326552	0.196221	0.17739	0.112666	0.0755201	0.0540707		3051.82	7647.35	42.233	42.0073	290.111	305.181	307.884	328.85	382.965	446.325	428.465	556.82	439.784
															3	1667.64	9	51.55	19.1143	18.9143	1.42143	91		56.6484	21.0047	20.7849	1.56201	100	0.0421638	0.325769	0.19559	0.176784	0.112138	0.0750313	0.0536005		2988.15	7595.58	42.2387	42.0099	289.739	305.01	307.369	328.612	381.454	445.604	425.501	555.361	435.209
															3	1668.08	9.1	51.5417	19.1333	18.8333	1.39167	90.9		56.7015	21.0488	20.7187	1.53099	100	0.0420129	0.324984	0.194958	0.176176	0.111609	0.0745414	0.0531292		2925.51	7544.26	42.2444	42.0125	289.367	304.838	306.854	328.372	379.94	444.883	422.535	553.901	430.636
															3	1668.51	9.2	51.5333	19.1524	18.7524	1.3619	90.8		56.7548	21.0929	20.6524	1.4999	100	0.0418616	0.324197	0.194325	0.175568	0.111079	0.0740504	0.0526569		2863.9	7493.39	42.2501	42.0151	288.993	304.665	306.336	328.133	378.424	444.16	419.567	552.441	426.067
															3	1668.95	9.3	51.525	19.1714	18.6714	1.33214	90.7		56.8082	21.1372	20.5859	1.46874	100	0.04171	0.323409	0.193691	0.174958	0.110548	0.0735584	0.0521835		2803.31	7442.96	42.2559	42.0176	288.618	304.493	305.818	327.893	376.904	443.437	416.598	550.98	421.501
															3	1669.38	9.4	51.5167	19.1905	18.5905	1.30238	90.6		56.8617	21.1815	20.5193	1.43751	100	0.0415581	0.322619	0.193054	0.174346	0.110016	0.0730652	0.0517091		2743.73	7392.97	42.2616	42.0202	288.241	304.32	305.297	327.653	375.382	442.713	413.626	549.519	416.938
															3	1669.82	9.5	51.5083	19.2095	18.5095	1.27262	90.5		56.9153	21.226	20.4525	1.40621	100	0.0414058	0.321827	0.192417	0.173734	0.109483	0.072571	0.0512337		2685.13	7343.41	42.2674	42.0228	287.864	304.147	304.775	327.412	373.857	441.988	410.653	548.057	412.378
															3	1670.25	9.6	51.5	19.2286	18.4286	1.24286	90.4		56.969	21.2705	20.3856	1.37484	100	0.0412532	0.321034	0.191778	0.17312	0.108948	0.0720757	0.0507571		2627.52	7294.29	42.2732	42.0254	287.486	303.973	304.252	327.171	372.329	441.263	407.678	546.595	407.822
															3	1670.69	9.7	51.4917	19.2476	18.3476	1.2131	90.3		57.0229	21.3152	20.3185	1.34341	100	0.0411003	0.320238	0.191138	0.172504	0.108412	0.0715792	0.0502796		2570.88	7245.59	42.279	42.0281	287.106	303.799	303.727	326.929	370.798	440.536	404.7	545.132	403.269
															3	1671.12	9.8	51.4833	19.2667	18.2667	1.18333	90.2		57.0769	21.3599	20.2513	1.3119	100	0.040947	0.319441	0.190496	0.171888	0.107875	0.0710817	0.049801		2515.19	7197.32	42.2848	42.0307	286.725	303.625	303.201	326.687	369.264	439.809	401.721	543.669	398.72
															3	1671.56	9.9	51.475	19.2857	18.1857	1.15357	90.1		57.131	21.4048	20.1839	1.28032	100	0.0407934	0.318642	0.189853	0.171269	0.107337	0.0705831	0.0493213		2460.45	7149.47	42.2907	42.0333	286.343	303.451	302.673	326.444	367.727	439.081	398.74	542.205	394.174
															3	1671.99	10	51.4667	19.3048	18.1048	1.12381	90		57.1852	21.4497	20.1164	1.24868	100	0.0406394	0.317842	0.189209	0.17065	0.106798	0.0700833	0.0488405		2406.64	7102.05	42.2966	42.0359	285.96	303.276	302.144	326.201	366.187	438.352	395.757	540.741	389.631
															3	1672.43	10.1	51.4583	19.3238	18.0238	1.09405	89.9		57.2395	21.4948	20.0487	1.21696	100	0.0404851	0.317039	0.188563	0.170029	0.106257	0.0695825	0.0483587		2353.76	7055.03	42.3025	42.0386	285.575	303.1	301.613	325.958	364.644	437.622	392.772	539.275	385.092
															3	1672.86	10.2	51.45	19.3429	17.9429	1.06429	89.8		57.294	21.5399	19.9809	1.18517	100	0.0403305	0.316235	0.187915	0.169407	0.105715	0.0690805	0.0478758		2301.78	7008.43	42.3084	42.0412	285.189	302.925	301.08	325.714	363.099	436.891	389.785	537.81	380.557
															3	1673.3	10.3	51.4417	19.3619	17.8619	1.03452	89.7		57.3486	21.5852	19.9129	1.15332	100	0.0401755	0.315429	0.187266	0.168783	0.105172	0.0685774	0.0473918		2250.71	6962.24	42.3144	42.0439	284.802	302.749	300.546	325.469	361.55	436.16	386.796	536.344	376.025
															3	1673.73	10.4	51.4333	19.381	17.781	1.00476	89.6		57.4033	21.6305	19.8448	1.12139	100	0.0400201	0.314621	0.186616	0.168158	0.104628	0.0680732	0.0469068		2200.52	6916.45	42.3204	42.0465	284.414	302.573	300.01	325.225	359.998	435.428	383.805	534.877	371.497
															3	1674.17	10.5	51.425	19.4	17.7	0.975	89.5		57.4581	21.676	19.7765	1.08939	100	0.0398644	0.313812	0.185964	0.167532	0.104083	0.0675679	0.0464206		2151.21	6871.07	42.3264	42.0492	284.025	302.396	299.472	324.979	358.443	434.695	380.812	533.41	366.972
															3	1674.6	10.6	51.4167	19.419	17.619	0.945238	89.4		57.513	21.7215	19.7081	1.05731	100	0.0397084	0.313	0.185311	0.166904	0.103536	0.0670614	0.0459334		2102.77	6826.09	42.3324	42.0519	283.634	302.219	298.933	324.734	356.885	433.96	377.816	531.942	362.451
															3	1675.04	10.7	51.4083	19.4381	17.5381	0.915476	89.3		57.5681	21.7672	19.6395	1.02517	100	0.039552	0.312187	0.184656	0.166274	0.102988	0.0665538	0.0454451		2055.18	6781.5	42.3384	42.0546	283.242	302.042	298.392	324.487	355.324	433.226	374.819	530.473	357.933
															3	1675.47	10.8	51.4	19.4571	17.4571	0.885714	89.2		57.6233	21.8129	19.5708	0.992953	100	0.0393953	0.311372	0.184	0.165644	0.102439	0.0660451	0.0449557		2008.43	6737.3	42.3445	42.0572	282.849	301.864	297.85	324.241	353.759	432.49	371.819	529.004	353.42
															3	1675.9	10.9	51.3917	19.4762	17.3762	0.855952	89.1		57.6786	21.8588	19.5019	0.960665	100	0.0392382	0.310555	0.183342	0.165012	0.101889	0.0655352	0.0444652		1962.52	6693.5	42.3506	42.0599	282.454	301.686	297.306	323.994	352.192	431.753	368.817	527.535	348.91
															3	1676.34	11	51.3833	19.4952	17.2952	0.82619	89		57.7341	21.9048	19.4329	0.928304	100	0.0390807	0.309737	0.182683	0.164378	0.101337	0.0650241	0.0439736		1917.44	6650.08	42.3567	42.0626	282.058	301.507	296.76	323.746	350.621	431.015	365.814	526.065	344.404
															3	1676.77	11.1	51.375	19.5143	17.2143	0.796429	88.9		57.7897	21.9508	19.3637	0.89587	100	0.0389229	0.308916	0.182023	0.163743	0.100785	0.064512	0.0434808		1873.16	6607.05	42.3629	42.0653	281.661	301.329	296.212	323.498	349.047	430.277	362.807	524.594	339.902
															3	1677.21	11.2	51.3667	19.5333	17.1333	0.766667	88.8		57.8453	21.997	19.2943	0.863363	100	0.0387648	0.308094	0.181361	0.163107	0.100231	0.0639986	0.042987		1829.69	6564.39	42.369	42.068	281.262	301.149	295.663	323.25	347.47	429.538	359.799	523.122	335.404
															3	1677.64	11.3	51.3583	19.5524	17.0524	0.736905	88.7		57.9012	22.0433	19.2248	0.830783	100	0.0386063	0.30727	0.180697	0.162469	0.0996754	0.0634841	0.0424921		1787	6522.11	42.3752	42.0708	280.863	300.97	295.112	323.001	345.889	428.797	356.789	521.65	330.91
															3	1678.08	11.4	51.35	19.5714	16.9714	0.707143	88.6		57.9571	22.0896	19.1551	0.79813	100	0.0384474	0.306443	0.180032	0.16183	0.0991189	0.0629685	0.041996		1745.1	6480.21	42.3815	42.0735	280.461	300.79	294.559	322.751	344.305	428.056	353.776	520.178	326.42
															3	1678.51	11.5	51.3417	19.5905	16.8905	0.677381	88.5		58.0132	22.1361	19.0853	0.765402	100	0.0382882	0.305616	0.179365	0.161189	0.0985611	0.0624517	0.0414988		1703.97	6438.68	42.3877	42.0762	280.059	300.61	294.005	322.501	342.718	427.314	350.761	518.705	321.933
															3	1678.95	11.6	51.3333	19.6095	16.8095	0.647619	88.4		58.0694	22.1827	19.0153	0.732601	100	0.0381286	0.304786	0.178697	0.160547	0.098002	0.0619337	0.0410005		1663.6	6397.51	42.394	42.079	279.655	300.429	293.448	322.251	341.127	426.571	347.743	517.231	317.451
															3	1679.38	11.7	51.325	19.6286	16.7286	0.617857	88.3		58.1257	22.2294	18.9452	0.699725	100	0.0379687	0.303954	0.178028	0.159904	0.0974417	0.0614145	0.0405011		1623.97	6356.71	42.4003	42.0817	279.25	300.248	292.89	322	339.533	425.827	344.724	515.756	312.974
															3	1679.82	11.8	51.3167	19.6476	16.6476	0.588095	88.2		58.1822	22.2762	18.8749	0.666775	100	0.0378083	0.30312	0.177357	0.159259	0.0968801	0.0608942	0.0400005		1585.09	6316.27	42.4066	42.0845	278.843	300.067	292.33	321.748	337.935	425.082	341.701	514.281	308.5
															3	1680.25	11.9	51.3083	19.6667	16.5667	0.558333	88.1		58.2387	22.3231	18.8044	0.63375	100	0.0376477	0.302285	0.176684	0.158612	0.0963172	0.0603727	0.0394988		1546.94	6276.2	42.4129	42.0872	278.435	299.885	291.768	321.496	336.334	424.337	338.677	512.806	304.031
															3	1680.69	12	51.3	19.6857	16.4857	0.528571	88		58.2955	22.3701	18.7338	0.600649	100	0.0374866	0.301447	0.17601	0.157964	0.0957531	0.05985	0.038996		1509.51	6236.47	42.4193	42.09	278.025	299.703	291.205	321.244	334.73	423.59	335.65	511.329	299.566
															3	1681.12	12.1	51.2917	19.7048	16.4048	0.49881	87.9		58.3523	22.4172	18.663	0.567474	100	0.0373252	0.300608	0.175334	0.157315	0.0951877	0.0593261	0.038492		1472.79	6197.1	42.4257	42.0928	277.614	299.52	290.639	320.991	333.121	422.842	332.621	509.853	295.105
															3	1681.56	12.2	51.2833	19.7238	16.3238	0.469048	87.8		58.4093	22.4645	18.592	0.534223	100	0.0371635	0.299767	0.174657	0.156664	0.0946209	0.058801	0.0379869		1436.77	6158.09	42.4321	42.0955	277.202	299.337	290.072	320.738	331.51	422.094	329.589	508.375	290.649
															3	1681.99	12.3	51.275	19.7429	16.2429	0.439286	87.7		58.4664	22.5118	18.5209	0.500896	100	0.0370013	0.298924	0.173978	0.156011	0.0940529	0.0582747	0.0374806		1401.44	6119.41	42.4386	42.0983	276.788	299.154	289.503	320.484	329.894	421.344	326.555	506.897	286.197
															3	1682.43	12.4	51.2667	19.7619	16.1619	0.409524	87.6		58.5236	22.5593	18.4497	0.467493	100	0.0368388	0.298079	0.173298	0.155357	0.0934836	0.0577472	0.0369732		1366.79	6081.09	42.445	42.1011	276.373	298.97	288.932	320.229	328.275	420.593	323.518	505.418	281.75
															3	1682.86	12.5	51.2583	19.781	16.081	0.379762	87.5		58.581	22.6068	18.3782	0.434014	100	0.0366759	0.297232	0.172616	0.154702	0.092913	0.0572186	0.0364646		1332.81	6043.1	42.4516	42.1039	275.956	298.786	288.359	319.974	326.653	419.842	320.479	503.938	277.307
															3	1683.3	12.6	51.25	19.8	16	0.35	87.4		58.6384	22.6545	18.3066	0.400458	100	0.0365127	0.296383	0.171932	0.154045	0.0923411	0.0566887	0.0359548		1299.49	6005.45	42.4581	42.1067	275.537	298.602	287.784	319.719	325.026	419.089	317.437	502.458	272.87
															3	1683.73	12.7	51.2417	19.819	15.919	0.320238	87.3		58.6961	22.7022	18.2349	0.366825	100	0.036349	0.295532	0.171247	0.153387	0.0917679	0.0561575	0.0354439		1266.83	5968.14	42.4646	42.1096	275.118	298.417	287.207	319.463	323.396	418.336	314.393	500.977	268.436
															3	1684.17	12.8	51.2333	19.8381	15.8381	0.290476	87.2		58.7538	22.7501	18.163	0.333115	100	0.036185	0.294679	0.170561	0.152727	0.0911933	0.0556252	0.0349318		1234.82	5931.16	42.4712	42.1124	274.696	298.231	286.628	319.206	321.762	417.581	311.345	499.496	264.008
															3	1684.6	12.9	51.225	19.8571	15.7571	0.260714	87.1		58.8117	22.7981	18.0909	0.299328	100	0.0360206	0.293824	0.169873	0.152065	0.0906175	0.0550917	0.0344185		1203.43	5894.51	42.4778	42.1152	274.274	298.046	286.047	318.949	320.124	416.826	308.296	498.014	259.585
															3	1685.04	13	51.2167	19.8762	15.6762	0.230952	87		58.8697	22.8462	18.0186	0.265463	100	0.0358559	0.292968	0.169183	0.151402	0.0900403	0.0545569	0.033904		1172.67	5858.19	42.4845	42.1181	273.849	297.859	285.464	318.692	318.483	416.07	305.243	496.531	255.166
															3	1685.47	13.1	51.2083	19.8952	15.5952	0.20119	86.9		58.9279	22.8944	17.9462	0.23152	100	0.0356907	0.292109	0.168492	0.150738	0.0894618	0.0540209	0.0333884		1142.53	5822.19	42.4912	42.1209	273.423	297.673	284.879	318.433	316.837	415.312	302.188	495.047	250.753
															3	1685.9	13.2	51.2	19.9143	15.5143	0.171429	86.8		58.9862	22.9427	17.8736	0.197498	100	0.0355252	0.291248	0.167799	0.150072	0.0888819	0.0534836	0.0328715		1113	5786.52	42.4979	42.1238	272.996	297.486	284.292	318.175	315.187	414.553	299.13	493.563	246.344
															3	1686.34	13.3	51.1917	19.9333	15.4333	0.141667	86.7		59.0446	22.9912	17.8008	0.163399	100	0.0353593	0.290386	0.167104	0.149404	0.0883008	0.0529451	0.0323535		1084.07	5751.16	42.5046	42.1266	272.567	297.299	283.703	317.916	313.534	413.794	296.07	492.078	241.941
															3	1686.77	13.4	51.1833	19.9524	15.3524	0.111905	86.6		59.1032	23.0397	17.7279	0.12922	100	0.035193	0.289521	0.166408	0.148735	0.0877182	0.0524054	0.0318343		1055.72	5716.12	42.5114	42.1295	272.136	297.111	283.112	317.656	311.876	413.033	293.006	490.593	237.543
															3	1687.21	13.5	51.175	19.9714	15.2714	0.0821429	86.5		59.1618	23.0884	17.6548	0.0949628	100	0.0350264	0.288654	0.16571	0.148065	0.0871344	0.0518644	0.0313139		1027.96	5681.39	42.5181	42.1324	271.704	296.923	282.519	317.396	310.215	412.272	289.94	489.106	233.151
															3	1687.64	13.6	51.1667	19.9905	15.1905	0.052381	86.4		59.2207	23.1371	17.5816	0.0606261	100	0.0348593	0.287786	0.165011	0.147393	0.0865492	0.0513222	0.0307922		1000.77	5646.98	42.525	42.1353	271.27	296.734	281.923	317.135	308.549	411.509	286.871	487.619	228.764
															3	1688.08	13.7	51.1583	20.0095	15.1095	0.022619	86.3		59.2796	23.186	17.5081	0.0262098	100	0.0346919	0.286915	0.16431	0.146719	0.0859626	0.0507787	0.0302694		974.144	5612.87	42.5318	42.1382	270.834	296.545	281.326	316.873	306.879	410.745	283.798	486.131	224.382
															3	1688.51	13.8	51.15	20.0286	15.0286	0	86.2071		59.3338	23.2331	17.4331	0	100	0.0345444	0.286159	0.163716	0.146154	0.0854902	0.0503524	0.0298655		947.532	5579.06	42.5213	42.1409	270.218	296.354	280.515	316.61	304.797	409.978	280.076	484.638	219.15
															3	1688.95	13.9	51.1406	20.0848	14.8817	0	86.1071		59.3918	23.3254	17.2828	0	100	0.0343912	0.28547	0.163282	0.14578	0.0853097	0.050269	0.0298297		921.646	5545.55	42.5007	42.1435	269.336	296.16	279.337	316.342	301.688	409.199	274.513	483.127	211.404
															3	1689.38	14	51.1313	20.1411	14.7348	0	86.0071		59.45	23.4179	17.1321	0	100	0.0342377	0.28478	0.162847	0.145405	0.0851287	0.0501854	0.0297938		896.329	5512.35	42.48	42.1459	268.453	295.962	278.159	316.069	298.601	408.409	269.046	481.597	203.915
															3	1689.82	14.1	51.1219	20.1973	14.5879	0	85.9071		59.5083	23.5106	16.9811	0	100	0.0340838	0.284088	0.162411	0.14503	0.0849473	0.0501016	0.0297578		871.571	5479.43	42.4592	42.1481	267.57	295.761	276.982	315.792	295.535	407.608	263.672	480.052	196.675
															3	1690.25	14.2	51.1125	20.2536	14.4411	0	85.8071		59.5667	23.6036	16.8297	0	100	0.0339296	0.283394	0.161974	0.144653	0.0847655	0.0500176	0.0297218		847.362	5446.81	42.4383	42.1502	266.687	295.556	275.805	315.51	292.491	406.797	258.391	478.491	189.675
															3	1690.69	14.3	51.1031	20.3098	14.2942	0	85.7071		59.6253	23.6968	16.678	0	100	0.033775	0.282698	0.161536	0.144276	0.0845833	0.0499334	0.0296856		823.693	5414.48	42.4174	42.1521	265.803	295.348	274.629	315.224	289.468	405.977	253.202	476.915	182.909
															3	1691.12	14.4	51.0938	20.3661	14.1473	0	85.6071		59.684	23.7902	16.5259	0	100	0.0336201	0.282001	0.161097	0.143897	0.0844006	0.049849	0.0296494		800.556	5382.44	42.3965	42.1538	264.919	295.136	273.454	314.934	286.467	405.147	248.102	475.326	176.368
															3	1691.56	14.5	51.0844	20.4223	14.0004	0	85.5071		59.7428	23.8838	16.3734	0	100	0.0334648	0.281303	0.160657	0.143518	0.0842176	0.0497645	0.0296131		777.94	5350.69	42.3754	42.1553	264.034	294.922	272.279	314.64	283.487	404.308	243.09	473.725	170.047
															3	1691.99	14.6	51.075	20.4786	13.8536	0	85.4071		59.8018	23.9776	16.2206	0	100	0.0333091	0.280602	0.160216	0.143138	0.0840341	0.0496797	0.0295767		755.838	5319.21	42.3543	42.1566	263.149	294.704	271.105	314.342	280.528	403.46	238.166	472.111	163.938
															3	1692.43	14.7	51.0656	20.5348	13.7067	0	85.3071		59.8609	24.0716	16.0675	0	100	0.0331531	0.2799	0.159774	0.142757	0.0838501	0.0495947	0.0295402		734.241	5288.02	42.3331	42.1578	262.263	294.484	269.931	314.04	277.59	402.604	233.328	470.487	158.034
															3	1692.86	14.8	51.0562	20.5911	13.5598	0	85.2071		59.9202	24.1659	15.9139	0	100	0.0329967	0.279197	0.159331	0.142375	0.0836657	0.0495095	0.0295036		713.14	5257.11	42.3119	42.1589	261.377	294.26	268.758	313.734	274.673	401.739	228.575	468.853	152.329
															3	1693.3	14.9	51.0469	20.6473	13.4129	0	85.1071		59.9795	24.2604	15.7601	0	100	0.0328399	0.278492	0.158886	0.141992	0.0834809	0.0494241	0.029467		692.526	5226.48	42.2906	42.1598	260.49	294.033	267.585	313.424	271.777	400.867	223.905	467.209	146.818
															3	1693.73	15	51.0375	20.7036	13.2661	0	85.0071		60.0391	24.3551	15.6058	0	100	0.0326828	0.277785	0.158441	0.141609	0.0832957	0.0493385	0.0294302		672.39	5196.12	42.2692	42.1605	259.603	293.804	266.414	313.111	268.902	399.987	219.317	465.556	141.493
															3	1694.17	15.1	51.0281	20.7598	13.1192	0	84.9071		60.0987	24.45	15.4512	0	100	0.0325252	0.277076	0.157995	0.141224	0.08311	0.0492528	0.0293934		652.726	5166.03	42.2478	42.1611	258.715	293.571	265.242	312.794	266.048	399.1	214.81	463.895	136.349
															3	1694.6	15.2	51.0187	20.8161	12.9723	0	84.8071		60.1586	24.5452	15.2963	0	100	0.0323674	0.276366	0.157547	0.140838	0.0829239	0.0491668	0.0293565		633.523	5136.21	42.2262	42.1615	257.827	293.336	264.072	312.473	263.214	398.206	210.384	462.228	131.38
															3	1695.04	15.3	51.0094	20.8723	12.8254	0	84.7071		60.2185	24.6406	15.1409	0	100	0.0322091	0.275654	0.157099	0.140452	0.0827374	0.0490806	0.0293195		614.774	5106.66	42.2047	42.1618	256.938	293.098	262.902	312.149	260.401	397.306	206.036	460.553	126.58
															3	1695.47	15.4	51	20.9286	12.6786	0	84.6071		60.2786	24.7362	14.9852	0	100	0.0320505	0.27494	0.156649	0.140065	0.0825504	0.0489942	0.0292824		596.472	5077.37	42.183	42.1619	256.049	292.858	261.732	311.822	257.609	396.399	201.765	458.873	121.945
															3	1695.9	15.5	50.9906	20.9848	12.5317	0	84.5071		60.3388	24.832	14.8292	0	100	0.0318915	0.274225	0.156199	0.139676	0.0823629	0.0489076	0.0292452		578.607	5048.35	42.1613	42.1619	255.159	292.614	260.563	311.491	254.837	395.485	197.57	457.187	117.469
															3	1696.34	15.6	50.9812	21.0411	12.3848	0	84.4071		60.3992	24.9281	14.6727	0	100	0.0317321	0.273508	0.155747	0.139287	0.0821751	0.0488208	0.029208		561.173	5019.58	42.1395	42.1618	254.268	292.369	259.395	311.157	252.085	394.566	193.451	455.496	113.146
															3	1696.77	15.7	50.9719	21.0973	12.2379	0	84.3071		60.4597	25.0244	14.5159	0	100	0.0315723	0.272789	0.155295	0.138897	0.0819867	0.0487338	0.0291706		544.161	4991.08	42.1176	42.1615	253.378	292.12	258.228	310.82	249.354	393.641	189.406	453.801	108.973
															3	1697.21	15.8	50.9625	21.1536	12.0911	0	84.2071		60.5204	25.1209	14.3587	0	100	0.0314122	0.272069	0.154841	0.138506	0.081798	0.0486466	0.0291332		527.563	4962.83	42.0957	42.1611	252.486	291.869	257.061	310.48	246.643	392.711	185.434	452.103	104.944
															3	1697.64	15.9	50.9531	21.2098	11.9442	0	84.1071		60.5812	25.2176	14.2012	0	100	0.0312517	0.271347	0.154386	0.138114	0.0816088	0.0485591	0.0290956		511.372	4934.83	42.0737	42.1605	251.594	291.616	255.894	310.136	243.952	391.775	181.533	450.401	101.054
															3	1698.08	16	50.9438	21.2661	11.7973	0	84.0071		60.6422	25.3146	14.0432	0	100	0.0310908	0.270623	0.15393	0.137721	0.0814191	0.0484715	0.029058		495.581	4907.09	42.0516	42.1599	250.702	291.36	254.728	309.79	241.281	390.835	177.704	448.697	97.2995
															3	1698.51	16.1	50.9344	21.3223	11.6504	0	83.9071		60.7033	25.4118	13.8849	0	100	0.0309295	0.269897	0.153473	0.137328	0.081229	0.0483837	0.0290203		480.182	4879.59	42.0294	42.159	249.809	291.102	253.563	309.441	238.63	389.889	173.944	446.99	93.6755
															3	1698.95	16.2	50.925	21.3786	11.5036	0	83.8071		60.7645	25.5092	13.7262	0	100	0.0307678	0.26917	0.153015	0.136933	0.0810384	0.0482956	0.0289825		465.167	4852.34	42.0072	42.1581	248.916	290.842	252.399	309.089	235.999	388.939	170.252	445.282	90.1779
															3	1699.38	16.3	50.9156	21.4348	11.3567	0	83.7071		60.8259	25.6069	13.5672	0	100	0.0306058	0.268441	0.152556	0.136537	0.0808473	0.0482073	0.0289446		450.53	4825.33	41.9849	42.157	248.022	290.579	251.235	308.734	233.388	387.985	166.628	443.572	86.8026
															3	1699.82	16.4	50.9062	21.4911	11.2098	0	83.6071		60.8874	25.7048	13.4077	0	100	0.0304433	0.26771	0.152095	0.13614	0.0806559	0.0481189	0.0289066		436.263	4798.57	41.9625	42.1559	247.127	290.314	250.072	308.376	230.797	387.027	163.071	441.862	83.5457
															3	1700.25	16.5	50.8969	21.5473	11.0629	0	83.5071		60.9491	25.803	13.2479	0	100	0.0302805	0.266978	0.151634	0.135743	0.0804639	0.0480302	0.0288685		422.36	4772.05	41.94	42.1545	246.232	290.047	248.909	308.016	228.225	386.064	159.579	440.151	80.4031
															3	1700.69	16.6	50.8875	21.6036	10.9161	0	83.4071		61.011	25.9013	13.0877	0	100	0.0301173	0.266243	0.151171	0.135344	0.0802715	0.0479413	0.0288304		408.813	4745.76	41.9175	42.1531	245.336	289.778	247.747	307.653	225.673	385.098	156.152	438.44	77.3713
															3	1701.12	16.7	50.8781	21.6598	10.7692	0	83.3071		61.0729	26	12.9271	0	100	0.0299537	0.265507	0.150708	0.134945	0.0800786	0.0478522	0.0287921		395.615	4719.72	41.8949	42.1516	244.44	289.506	246.586	307.287	223.14	384.128	152.788	436.73	74.4466
															3	1701.56	16.8	50.8687	21.7161	10.6223	0	83.2071		61.1351	26.0988	12.7661	0	100	0.0297897	0.26477	0.150243	0.134544	0.0798853	0.0477629	0.0287538		382.76	4693.9	41.8722	42.1499	243.544	289.233	245.425	306.919	220.627	383.155	149.486	435.02	71.6254
															3	1701.99	16.9	50.8594	21.7723	10.4754	0	83.1071		61.1974	26.1979	12.6047	0	100	0.0296252	0.26403	0.149777	0.134143	0.0796915	0.0476733	0.0287153		370.241	4668.32	41.8494	42.1481	242.646	288.957	244.265	306.548	218.133	382.178	146.246	433.311	68.9044
															3	1702.43	17	50.85	21.8286	10.3286	0	83.0071		61.2598	26.2972	12.443	0	100	0.0294605	0.263289	0.14931	0.133741	0.0794972	0.0475836	0.0286768		358.051	4642.96	41.8266	42.1462	241.749	288.679	243.106	306.175	215.659	381.199	143.067	431.604	66.2802
															3	1702.86	17.1	50.8406	21.8848	10.1817	0	82.9071		61.3224	26.3968	12.2808	0	100	0.0292953	0.262546	0.148842	0.133337	0.0793025	0.0474936	0.0286382		346.184	4617.84	41.8037	42.1442	240.85	288.4	241.947	305.799	213.203	380.216	139.947	429.899	63.7495
															3	1703.3	17.2	50.8312	21.9411	10.0348	0	82.8071		61.3851	26.4966	12.1183	0	100	0.0291297	0.261801	0.148373	0.132933	0.0791073	0.0474034	0.0285995		334.633	4592.93	41.7807	42.1421	239.951	288.118	240.789	305.421	210.767	379.231	136.886	428.195	61.3094
															3	1703.73	17.3	50.8219	21.9973	9.88795	0	82.7071		61.448	26.5966	11.9554	0	100	0.0289637	0.261054	0.147902	0.132528	0.0789116	0.047313	0.0285606		323.392	4568.25	41.7576	42.1399	239.052	287.834	239.631	305.041	208.35	378.244	133.882	426.494	58.9568
															3	1704.17	17.4	50.8125	22.0536	9.74107	0	82.6071		61.511	26.6969	11.792	0	100	0.0287973	0.260305	0.147431	0.132121	0.0787155	0.0472224	0.0285217		312.455	4543.79	41.7344	42.1376	238.152	287.549	238.474	304.658	205.951	377.253	130.936	424.795	56.6887
															3	1704.6	17.5	50.8031	22.1098	9.5942	0	82.5071		61.5742	26.7975	11.6283	0	100	0.0286305	0.259555	0.146958	0.131714	0.0785188	0.0471315	0.0284827		301.816	4519.55	41.7112	42.1351	237.251	287.261	237.318	304.274	203.572	376.261	128.045	423.099	54.5023
															3	1705.04	17.6	50.7937	22.1661	9.44732	0	82.4071		61.6376	26.8982	11.4642	0	100	0.0284633	0.258803	0.146484	0.131306	0.0783217	0.0470405	0.0284436		291.467	4495.53	41.6878	42.1326	236.35	286.972	236.163	303.887	201.211	375.266	125.209	421.407	52.395
															3	1705.47	17.7	50.7844	22.2223	9.30045	0	82.3071		61.7011	26.9993	11.2997	0	100	0.0282956	0.258049	0.146009	0.130896	0.0781242	0.0469492	0.0284044		281.405	4471.72	41.6644	42.1299	235.449	286.681	235.008	303.498	198.869	374.27	122.428	419.718	50.3639
															3	1705.9	17.8	50.775	22.2786	9.15357	0	82.2071		61.7647	27.1005	11.1348	0	100	0.0281276	0.257293	0.145533	0.130486	0.0779261	0.0468577	0.0283652		271.622	4448.13	41.6409	42.1272	234.546	286.388	233.854	303.106	196.546	373.271	119.699	418.032	48.4066
															3	1706.34	17.9	50.7656	22.3348	9.0067	0	82.1071		61.8285	27.202	10.9694	0	100	0.0279592	0.256535	0.145056	0.130075	0.0777275	0.0467659	0.0283258		262.112	4424.74	41.6173	42.1244	233.643	286.094	232.7	302.713	194.241	372.271	117.024	416.351	46.5205
															3	1706.77	18	50.7563	22.3911	8.85982	0	82.0071		61.8925	27.3038	10.8037	0	100	0.0277904	0.255776	0.144577	0.129663	0.0775285	0.046674	0.0282863		252.871	4401.56	41.5937	42.1214	232.74	285.797	231.547	302.318	191.955	371.269	114.399	414.673	44.7033
															3	1707.21	18.1	50.7469	22.4473	8.71295	0	81.9071		61.9566	27.4058	10.6376	0	100	0.0276211	0.255014	0.144098	0.129249	0.077329	0.0465818	0.0282467		243.891	4378.59	41.5699	42.1184	231.836	285.499	230.395	301.92	189.687	370.266	111.826	413	42.9526
															3	1707.64	18.2	50.7375	22.5036	8.56607	0	81.8071		62.0209	27.5081	10.4711	0	100	0.0274514	0.254251	0.143617	0.128835	0.077129	0.0464894	0.0282071		235.168	4355.83	41.5461	42.1152	230.931	285.199	229.244	301.521	187.437	369.262	109.302	411.331	41.2661
															3	1708.08	18.3	50.7281	22.5598	8.4192	0	81.7071		62.0853	27.6106	10.3041	0	100	0.0272814	0.253486	0.143135	0.12842	0.0769285	0.0463968	0.0281673		226.697	4333.26	41.5222	42.112	230.026	284.898	228.093	301.12	185.206	368.256	106.828	409.667	39.6416
															3	1708.51	18.4	50.7188	22.6161	8.27232	0	81.6071		62.1499	27.7133	10.1368	0	100	0.0271109	0.252719	0.142652	0.128004	0.0767275	0.0463039	0.0281274		218.47	4310.9	41.4981	42.1086	229.121	284.595	226.943	300.717	182.993	367.249	104.402	408.008	38.077
															3	1708.95	18.5	50.7094	22.6723	8.12545	0	81.5071		62.2146	27.8164	9.969	0	100	0.0269399	0.25195	0.142168	0.127586	0.076526	0.0462108	0.0280875		210.484	4288.74	41.474	42.1052	228.214	284.29	225.793	300.312	180.798	366.241	102.023	406.354	36.5702
															3	1709.38	18.6	50.7	22.7286	7.97857	0	81.4071		62.2795	27.9196	9.80082	0	100	0.0267686	0.251179	0.141682	0.127168	0.0763241	0.0461175	0.0280474		202.733	4266.77	41.4499	42.1017	227.307	283.983	224.645	299.905	178.621	365.232	99.691	404.706	35.1194
															3	1709.82	18.7	50.6906	22.7848	7.8317	0	81.3071		62.3446	28.0231	9.63224	0	100	0.0265969	0.250406	0.141195	0.126748	0.0761216	0.046024	0.0280072		195.212	4245	41.4256	42.0981	226.4	283.675	223.496	299.496	176.461	364.223	97.405	403.062	33.7224
															3	1710.25	18.8	50.6812	22.8411	7.68482	0	81.2071		62.4098	28.1269	9.46323	0	100	0.0264247	0.249632	0.140708	0.126328	0.0759186	0.0459302	0.027967		187.916	4223.42	41.4012	42.0944	225.492	283.366	222.349	299.086	174.32	363.213	95.1643	401.424	32.3775
															3	1710.69	18.9	50.6719	22.8973	7.53795	0	81.1071		62.4752	28.231	9.29381	0	100	0.0262521	0.248855	0.140218	0.125907	0.0757152	0.0458362	0.0279266		180.838	4202.03	41.3768	42.0906	224.583	283.055	221.202	298.674	172.197	362.202	92.968	399.792	31.0828
															3	1711.12	19	50.6625	22.9536	7.39107	0	81.0071		62.5408	28.3352	9.12397	0	100	0.026079	0.248077	0.139728	0.125484	0.0755112	0.0457419	0.0278862		173.976	4180.83	41.3522	42.0867	223.673	282.742	220.056	298.26	170.091	361.191	90.8154	398.166	29.8366
															3	1711.56	19.1	50.6531	23.0098	7.2442	0	80.9071		62.6065	28.4398	8.95372	0	100	0.0259056	0.247297	0.139237	0.125061	0.0753067	0.0456475	0.0278456		167.323	4159.81	41.3276	42.0827	222.764	282.428	218.911	297.844	168.002	360.18	88.7058	396.546	28.6372
															3	1711.99	19.2	50.6437	23.0661	7.09732	0	80.8071		62.6724	28.5446	8.78304	0	100	0.0257317	0.246514	0.138744	0.124636	0.0751017	0.0455528	0.0278049		160.875	4138.99	41.3028	42.0786	221.853	282.113	217.766	297.427	165.932	359.168	86.6385	394.932	27.483
															3	1712.43	19.3	50.6344	23.1223	6.95045	0	80.7071		62.7384	28.6497	8.61193	0	100	0.0255574	0.24573	0.13825	0.12421	0.0748963	0.0454578	0.0277642		154.627	4118.34	41.278	42.0745	220.942	281.796	216.622	297.009	163.878	358.156	84.6127	393.324	26.3724
															3	1712.86	19.4	50.625	23.1786	6.80357	0	80.6071		62.8046	28.755	8.44041	0	100	0.0253826	0.244944	0.137755	0.123784	0.0746903	0.0453626	0.0277233		148.574	4097.88	41.2531	42.0703	220.03	281.478	215.479	296.588	161.842	357.144	82.6277	391.723	25.3038
															3	1713.3	19.5	50.6156	23.2348	6.6567	0	80.5071		62.871	28.8606	8.26845	0	100	0.0252074	0.244156	0.137258	0.123356	0.0744837	0.0452672	0.0276824		142.713	4077.6	41.228	42.0659	219.117	281.158	214.337	296.167	159.824	356.132	80.6829	390.127	24.2757
															3	1713.73	19.6	50.6062	23.2911	6.50982	0	80.4071		62.9375	28.9664	8.09607	0	100	0.0250318	0.243366	0.136761	0.122927	0.0742767	0.0451716	0.0276413		137.037	4057.49	41.2029	42.0615	218.204	280.837	213.195	295.743	157.822	355.12	78.7776	388.539	23.2868
															3	1714.17	19.7	50.5969	23.3473	6.36295	0	80.3071		63.0042	29.0725	7.92326	0	100	0.0248557	0.242574	0.136262	0.122497	0.0740692	0.0450757	0.0276001		131.543	4037.56	41.1777	42.057	217.291	280.514	212.054	295.318	155.838	354.109	76.9111	386.957	22.3357
															3	1714.6	19.8	50.5875	23.4036	6.21607	0	80.2071		63.0711	29.1789	7.75002	0	100	0.0246792	0.24178	0.135761	0.122066	0.0738611	0.0449796	0.0275589		126.227	4017.81	41.1524	42.0525	216.376	280.19	210.913	294.892	153.871	353.097	75.0828	385.382	21.4209
															3	1715.04	19.9	50.5781	23.4598	6.0692	0	80.1071		63.1381	29.2856	7.57635	0	100	0.0245023	0.240984	0.13526	0.121634	0.0736525	0.0448832	0.0275175		121.084	3998.23	41.127	42.0478	215.461	279.865	209.774	294.464	151.92	352.087	73.2919	383.814	20.5412
															3	1715.47	20	50.5688	23.5161	5.92232	0	80.0071		63.2053	29.3925	7.40224	0	100	0.0243249	0.240186	0.134757	0.121201	0.0734434	0.0447866	0.027476		116.109	3978.82	41.1015	42.0431	214.546	279.538	208.635	294.035	149.987	351.076	71.5379	382.252	19.6954
															3	1715.9	20.1	50.5594	23.5723	5.77545	0	79.9071		63.2727	29.4996	7.2277	0	100	0.0241471	0.239386	0.134254	0.120767	0.0732338	0.0446897	0.0274344		111.299	3959.57	41.0759	42.0383	213.629	279.21	207.497	293.605	148.071	350.066	69.82	380.698	18.8822
															3	1716.34	20.2	50.55	23.6286	5.62857	0	79.8071		63.3402	29.6071	7.05272	0	100	0.0239688	0.238584	0.133748	0.120332	0.0730237	0.0445926	0.0273927		106.65	3940.5	41.0501	42.0334	212.712	278.881	206.359	293.173	146.171	349.057	68.1378	379.151	18.1004
															3	1716.77	20.3	50.5406	23.6848	5.4817	0	79.7071		63.4079	29.7148	6.8773	0	100	0.0237901	0.23778	0.133242	0.119895	0.072813	0.0444953	0.027351		102.157	3921.59	41.0243	42.0284	211.795	278.551	205.222	292.74	144.288	348.048	66.4905	377.61	17.349
															3	1717.21	20.4	50.5312	23.7411	5.33482	0	79.6071		63.4758	29.8228	6.70144	0	100	0.0236109	0.236974	0.132734	0.119458	0.0726018	0.0443977	0.0273091		97.8168	3902.85	40.9984	42.0234	210.877	278.219	204.086	292.305	142.421	347.04	64.8775	376.077	16.6268
															3	1717.64	20.5	50.5219	23.7973	5.18795	0	79.5071		63.5438	29.931	6.52513	0	100	0.0234313	0.236166	0.132225	0.119019	0.0723901	0.0442999	0.0272671		93.625	3884.27	40.9724	42.0182	209.958	277.886	202.951	291.869	140.571	346.033	63.2983	374.552	15.9328
															3	1718.08	20.6	50.5125	23.8536	5.04107	0	79.4071		63.612	30.0396	6.34839	0	100	0.0232513	0.235356	0.131715	0.118579	0.0721778	0.0442018	0.027225		89.578	3865.85	40.9463	42.013	209.038	277.552	201.817	291.432	138.737	345.027	61.7523	373.033	15.2659
															3	1718.51	20.7	50.5031	23.9098	4.8942	0	79.3071		63.6804	30.1484	6.17119	0	100	0.0230707	0.234544	0.131203	0.118139	0.071965	0.0441035	0.0271828		85.672	3847.58	40.92	42.0078	208.118	277.216	200.683	290.994	136.92	344.021	60.2388	371.522	14.6251
															3	1718.95	20.8	50.4937	23.9661	4.74732	0	79.2071		63.749	30.2575	5.99355	0	100	0.0228898	0.23373	0.130691	0.117697	0.0717517	0.0440049	0.0271404		81.9033	3829.48	40.8937	42.0024	207.197	276.88	199.55	290.554	135.119	343.017	58.7573	370.018	14.0096
															3	1719.38	20.9	50.4844	24.0223	4.60045	0	79.1071		63.8177	30.3668	5.81546	0	100	0.0227083	0.232913	0.130176	0.117254	0.0715378	0.0439061	0.027098		78.2682	3811.53	40.8672	41.997	206.275	276.542	198.418	290.113	133.334	342.014	57.3073	368.522	13.4183
															3	1719.82	21	50.475	24.0786	4.45357	0	79.0071		63.8866	30.4764	5.63692	0	100	0.0225264	0.232095	0.129661	0.11681	0.0713234	0.0438071	0.0270555		74.7631	3793.74	40.8407	41.9915	205.353	276.203	197.286	289.671	131.566	341.011	55.8881	367.033	12.8504
															3	1720.25	21.1	50.4656	24.1348	4.3067	0	78.9071		63.9557	30.5864	5.45793	0	100	0.0223441	0.231275	0.129144	0.116364	0.0711084	0.0437077	0.0270128		71.3846	3776.1	40.814	41.9859	204.43	275.863	196.155	289.228	129.813	340.01	54.4992	365.552	12.305
															3	1720.69	21.2	50.4562	24.1911	4.15982	0	78.8071		64.025	30.6965	5.27848	0	100	0.0221612	0.230452	0.128626	0.115918	0.0708929	0.0436082	0.0269701		68.1292	3758.61	40.7872	41.9802	203.506	275.521	195.025	288.784	128.077	339.011	53.1401	364.079	11.7813
															3	1721.12	21.3	50.4469	24.2473	4.01295	0	78.7071		64.0944	30.807	5.09858	0	100	0.021978	0.229628	0.128107	0.11547	0.0706768	0.0435083	0.0269272		64.9935	3741.26	40.7603	41.9745	202.582	275.179	193.896	288.338	126.356	338.012	51.8103	362.613	11.2785
															3	1721.56	21.4	50.4375	24.3036	3.86607	0	78.6071		64.164	30.9178	4.91822	0	100	0.0217942	0.228801	0.127586	0.115022	0.0704602	0.0434083	0.0268843		61.9742	3724.07	40.7333	41.9687	201.657	274.835	192.768	287.891	124.651	337.015	50.5091	361.154	10.7958
															3	1721.99	21.5	50.4281	24.3598	3.7192	0	78.5071		64.2338	31.0288	4.7374	0	100	0.02161	0.227972	0.127064	0.114572	0.0702431	0.0433079	0.0268412		59.068	3707.02	40.7062	41.9628	200.731	274.491	191.64	287.444	122.962	336.02	49.2361	359.703	10.3324
															3	1722.43	21.6	50.4187	24.4161	3.57232	0	78.4071		64.3038	31.1401	4.55612	0	100	0.0214253	0.227142	0.126541	0.114121	0.0700253	0.0432074	0.026798		56.2717	3690.12	40.679	41.9569	199.805	274.145	190.513	286.995	121.288	335.026	47.9909	358.26	9.88769
															3	1722.86	21.7	50.4094	24.4723	3.42545	0	78.3071		64.3739	31.2517	4.37437	0	100	0.0212401	0.226309	0.126016	0.113669	0.0698071	0.0431065	0.0267547		53.5822	3673.36	40.6516	41.9509	198.878	273.798	189.387	286.545	119.63	334.033	46.7727	356.825	9.4609
															3	1723.3	21.8	50.4	24.5286	3.27857	0	78.2071		64.4442	31.3636	4.19216	0	100	0.0210545	0.225473	0.12549	0.113216	0.0695882	0.0430054	0.0267113		50.9963	3656.75	40.6242	41.9448	197.95	273.45	188.261	286.094	117.988	333.042	45.5813	355.397	9.05137
															3	1723.73	21.9	50.3906	24.5848	3.1317	0	78.1071		64.5147	31.4758	4.00949	0	100	0.0208684	0.224636	0.124963	0.112761	0.0693689	0.042904	0.0266678		48.5112	3640.27	40.5966	41.9386	197.021	273.101	187.137	285.643	116.361	332.053	44.416	353.977	8.65845
															3	1724.17	22	50.3813	24.6411	2.98482	0	78.0071		64.5854	31.5882	3.82634	0	100	0.0206818	0.223797	0.124434	0.112306	0.0691489	0.0428024	0.0266242		46.1237	3623.94	40.5689	41.9324	196.092	272.751	186.013	285.19	114.749	331.065	43.2764	352.565	8.28152
															3	1724.6	22.1	50.3719	24.6973	2.83795	0	77.9071		64.6563	31.701	3.64273	0	100	0.0204947	0.222955	0.123904	0.111849	0.0689284	0.0427005	0.0265804		43.8311	3607.74	40.5411	41.9261	195.162	272.4	184.89	284.736	113.153	330.079	42.1621	351.16	7.91995
															3	1725.04	22.2	50.3625	24.7536	2.69107	0	77.8071		64.7273	31.814	3.45864	0	100	0.0203072	0.222112	0.123372	0.111391	0.0687073	0.0425984	0.0265366		41.6304	3591.67	40.5131	41.9197	194.231	272.048	183.768	284.281	111.571	329.095	41.0725	349.763	7.57318
															3	1725.47	22.3	50.3531	24.8098	2.5442	0	77.7071		64.7986	31.9273	3.27408	0	100	0.0201192	0.221266	0.122839	0.110932	0.0684857	0.042496	0.0264926		39.5189	3575.74	40.485	41.9133	193.299	271.695	182.646	283.825	110.005	328.112	40.0072	348.374	7.24064
															3	1725.9	22.4	50.3438	24.8661	2.39732	0	77.6071		64.87	32.041	3.08905	0	100	0.0199306	0.220418	0.122305	0.110471	0.0682634	0.0423933	0.0264485		37.4939	3559.95	40.4569	41.9068	192.367	271.341	181.526	283.369	108.454	327.132	38.9657	346.993	6.92177
															3	1726.34	22.5	50.3344	24.9223	2.25045	0	77.5071		64.9416	32.1549	2.90353	0	100	0.0197416	0.219567	0.12177	0.11001	0.0680406	0.0422904	0.0264043		35.5526	3544.28	40.4285	41.9002	191.434	270.986	180.406	282.911	106.918	326.153	37.9477	345.62	6.61606
															3	1726.77	22.6	50.325	24.9786	2.10357	0	77.4071		65.0134	32.2691	2.71754	0	100	0.0195522	0.218715	0.121233	0.109547	0.0678173	0.0421872	0.02636		33.6924	3528.75	40.4001	41.8936	190.5	270.629	179.287	282.452	105.397	325.176	36.9525	344.254	6.32301
															3	1727.21	22.7	50.3156	25.0348	1.9567	0	77.3071		65.0854	32.3836	2.53107	0	100	0.0193622	0.21786	0.120694	0.109083	0.0675933	0.0420837	0.0263156		31.9109	3513.35	40.3715	41.8869	189.566	270.272	178.169	281.993	103.89	324.201	35.9799	342.896	6.04212
															3	1727.64	22.8	50.3062	25.0911	1.80982	0	77.2071		65.1575	32.4984	2.34411	0	100	0.0191717	0.217003	0.120155	0.108618	0.0673688	0.04198	0.0262711		30.2054	3498.07	40.3428	41.8801	188.63	269.914	177.051	281.533	102.399	323.228	35.0294	341.545	5.77291
															3	1728.08	22.9	50.2969	25.1473	1.66295	0	77.1071		65.2299	32.6135	2.15667	0	100	0.0189807	0.216144	0.119613	0.108152	0.0671437	0.041876	0.0262264		28.5735	3482.92	40.314	41.8733	187.694	269.555	175.935	281.072	100.922	322.258	34.1005	340.203	5.51495
															3	1728.51	23	50.2875	25.2036	1.51607	0	77.0071		65.3024	32.7289	1.96874	0	100	0.0187893	0.215283	0.119071	0.107685	0.066918	0.0417717	0.0261817		27.0128	3467.89	40.285	41.8664	186.757	269.195	174.819	280.61	99.459	321.289	33.1929	338.868	5.26779
															3	1728.95	23.1	50.2781	25.2598	1.3692	0	76.9071		65.3751	32.8446	1.78032	0	100	0.0185973	0.21442	0.118527	0.107216	0.0666917	0.0416671	0.0261368		25.521	3452.99	40.256	41.8594	185.82	268.834	173.704	280.147	98.0111	320.322	32.3062	337.541	5.03101
															3	1729.38	23.2	50.2687	25.3161	1.22232	0	76.8071		65.448	32.9606	1.59142	0	100	0.0184049	0.213554	0.117982	0.106746	0.0664648	0.0415623	0.0260918		24.0958	3438.21	40.2267	41.8524	184.881	268.472	172.59	279.683	96.5775	319.358	31.4398	336.222	4.8042
															3	1729.82	23.3	50.2594	25.3723	1.07545	0	76.7071		65.5211	33.0769	1.40202	0	100	0.0182119	0.212686	0.117435	0.106275	0.0662374	0.0414572	0.0260467		22.7348	3423.55	40.1974	41.8453	183.942	268.11	171.477	279.219	95.1583	318.396	30.5935	334.91	4.58697
															3	1730.25	23.4	50.25	25.4286	0.928571	0	76.6071		65.5944	33.1935	1.21212	0	100	0.0180184	0.211815	0.116887	0.105802	0.0660093	0.0413519	0.0260014		21.436	3409.01	40.1679	41.8381	183.002	267.746	170.365	278.754	93.7533	317.436	29.7669	333.606	4.37895
															3	1730.69	23.5	50.2406	25.4848	0.781696	0	76.5071		65.6679	33.3104	1.02173	0	100	0.0178245	0.210943	0.116337	0.105329	0.0657806	0.0412462	0.0259561		20.1971	3394.59	40.1382	41.8309	182.061	267.381	169.253	278.288	92.3626	316.478	28.9596	332.309	4.17977
															3	1731.12	23.6	50.2312	25.5411	0.634821	0	76.4071		65.7416	33.4276	0.83084	0	100	0.01763	0.210068	0.115786	0.104854	0.0655514	0.0411403	0.0259106		19.0161	3380.29	40.1085	41.8236	181.12	267.016	168.142	277.821	90.9859	315.522	28.1711	331.021	3.98907
															3	1731.56	23.7	50.2219	25.5973	0.487946	0	76.3071		65.8154	33.5451	0.639451	0	100	0.017435	0.209191	0.115233	0.104378	0.0653215	0.0410341	0.025865		17.891	3366.1	40.0786	41.8162	180.177	266.649	167.033	277.354	89.6233	314.569	27.4012	329.74	3.80653
															3	1731.99	23.8	50.2125	25.6536	0.341071	0	76.2071		65.8895	33.6629	0.447558	0	100	0.0172395	0.208311	0.114679	0.1039	0.0650911	0.0409276	0.0258193		16.8196	3352.03	40.0485	41.8088	179.234	266.282	165.924	276.885	88.2747	313.618	26.6494	328.466	3.63182
															3	1732.43	23.9	50.2031	25.7098	0.194196	0	76.1071		65.9637	33.7811	0.255162	0	100	0.0170435	0.207429	0.114124	0.103422	0.06486	0.0408209	0.0257735		15.8002	3338.07	40.0183	41.8013	178.29	265.914	164.815	276.416	86.9399	312.67	25.9154	327.2	3.46462
															3	1732.86	24	50.1938	25.7661	0.0473214	0	76.0071		66.0382	33.8995	0.0622592	0	100	0.0168469	0.206545	0.113567	0.102942	0.0646284	0.0407138	0.0257275		14.8307	3324.22	39.988	41.7937	177.345	265.545	163.708	275.947	85.619	311.724	25.1988	325.942	3.30463
															3	1733.3	24.1	50.1844	25.8223	0	0	76.0067		66.0263	33.9737	0	0	100	0.0167928	0.206351	0.113472	0.102865	0.0646049	0.0407129	0.0257347		13.7976	3310.49	39.824	41.7856	175.685	265.172	161.969	275.474	84.0434	310.779	24.4369	324.691	3.14529
															3	1734.01	24.2	50.1814	25.7253	0	0	75.9067		66.1093	33.8907	0	0	100	0.0167713	0.20614	0.113276	0.102685	0.0644865	0.0406353	0.0256839		12.8086	3296.86	39.6636	41.7768	174.191	264.796	160.404	274.998	82.6137	309.836	23.7407	323.447	2.99999
															3	1734.72	24.3	50.1784	25.6283	0	0	75.8067		66.1925	33.8075	0	0	100	0.0167498	0.205929	0.113079	0.102505	0.0643678	0.0405574	0.0256329		11.8882	3283.34	39.5034	41.7674	172.705	264.417	158.848	274.52	81.2039	308.896	23.0622	322.211	2.86095
															3	1735.44	24.4	50.1754	25.5313	0	0	75.7067		66.276	33.724	0	0	100	0.0167282	0.205717	0.112882	0.102324	0.0642489	0.0404793	0.0255818		11.0317	3269.93	39.3435	41.7575	171.227	264.035	157.304	274.04	79.8138	307.957	22.4009	320.982	2.72792
															3	1736.15	24.5	50.1724	25.4343	0	0	75.6067		66.3597	33.6403	0	0	100	0.0167065	0.205504	0.112684	0.102143	0.0641296	0.040401	0.0255305		10.2349	3256.63	39.1838	41.747	169.758	263.65	155.769	273.557	78.4432	307.02	21.7566	319.761	2.60067
															3	1736.87	24.6	50.1694	25.3373	0	0	75.5067		66.4436	33.5564	0	0	100	0.0166848	0.205291	0.112486	0.101961	0.0640099	0.0403225	0.0254791		9.49378	3243.43	39.0244	41.7359	168.296	263.263	154.245	273.072	77.0918	306.085	21.1287	318.547	2.47895
															3	1737.58	24.7	50.1664	25.2403	0	0	75.4067		66.5277	33.4723	0	0	100	0.016663	0.205077	0.112287	0.101779	0.06389	0.0402438	0.0254276		8.80456	3230.33	38.8654	41.7243	166.843	262.872	152.731	272.585	75.7596	305.153	20.517	317.341	2.36255
															3	1738.3	24.8	50.1634	25.1433	0	0	75.3067		66.6121	33.3879	0	0	100	0.0166412	0.204862	0.112088	0.101596	0.0637698	0.0401649	0.025376		8.16374	3217.34	38.7065	41.7121	165.398	262.479	151.227	272.096	74.4461	304.222	19.9211	316.141	2.25126
															3	1739.01	24.9	50.1604	25.0463	0	0	75.2067		66.6967	33.3033	0	0	100	0.0166193	0.204647	0.111888	0.101413	0.0636492	0.0400858	0.0253242		7.56802	3204.45	38.548	41.6994	163.961	262.084	149.733	271.604	73.1513	303.294	19.3406	314.949	2.14485
															3	1739.72	25	50.1574	24.9493	0	0	75.1067		66.7815	33.2185	0	0	100	0.0165974	0.204432	0.111688	0.10123	0.0635283	0.0400064	0.0252722		7.01435	3191.66	38.3897	41.6862	162.532	261.685	148.25	271.111	71.875	302.369	18.7752	313.765	2.04314
															3	1740.44	25.1	50.1544	24.8523	0	0	75.0067		66.8665	33.1335	0	0	100	0.0165754	0.204216	0.111487	0.101046	0.0634071	0.0399269	0.0252201		6.49986	3178.97	38.2317	41.6724	161.111	261.285	146.776	270.616	70.6169	301.445	18.2245	312.587	1.94593
															3	1741.15	25.2	50.1514	24.7553	0	0	74.9067		66.9518	33.0482	0	0	100	0.0165533	0.203999	0.111285	0.100861	0.0632855	0.0398471	0.0251679		6.02187	3166.38	38.074	41.6581	159.698	260.882	145.313	270.118	69.3768	300.525	17.6882	311.417	1.85304
															3	1741.87	25.3	50.1484	24.6583	0	0	74.8067		67.0373	32.9627	0	0	100	0.0165312	0.203782	0.111083	0.100676	0.0631637	0.0397671	0.0251156		5.57788	3153.88	37.9165	41.6434	158.293	260.476	143.86	269.619	68.1545	299.606	17.166	310.254	1.76428
															3	1742.58	25.4	50.1454	24.5613	0	0	74.7067		67.123	32.877	0	0	100	0.016509	0.203564	0.110881	0.10049	0.0630415	0.0396869	0.0250631		5.16555	3141.49	37.7593	41.6281	156.896	260.068	142.416	269.118	66.9499	298.69	16.6575	309.098	1.6795
															3	1743.3	25.5	50.1424	24.4643	0	0	74.6067		67.2089	32.7911	0	0	100	0.0164867	0.203345	0.110678	0.100304	0.062919	0.0396065	0.0250105		4.78271	3129.19	37.6024	41.6123	155.507	259.658	140.983	268.616	65.7627	297.777	16.1624	307.949	1.59851
															3	1744.01	25.6	50.1394	24.3673	0	0	74.5067		67.2951	32.7049	0	0	100	0.0164644	0.203126	0.110474	0.100117	0.0627961	0.0395259	0.0249577		4.42731	3116.98	37.4458	41.596	154.125	259.246	139.559	268.112	64.5928	296.866	15.6805	306.808	1.52117
															3	1744.72	25.7	50.1364	24.2703	0	0	74.4067		67.3815	32.6185	0	0	100	0.0164421	0.202907	0.11027	0.0999304	0.062673	0.0394451	0.0249048		4.09745	3104.87	37.2894	41.5792	152.752	258.832	138.145	267.606	63.4399	295.958	15.2113	305.673	1.44733
															3	1745.44	25.8	50.1334	24.1733	0	0	74.3067		67.4682	32.5318	0	0	100	0.0164196	0.202686	0.110065	0.0997428	0.0625494	0.039364	0.0248517		3.79137	3092.85	37.1333	41.562	151.387	258.415	136.742	267.099	62.3038	295.052	14.7547	304.545	1.37682
															3	1746.15	25.9	50.1304	24.0763	0	0	74.2067		67.5551	32.4449	0	0	100	0.0163972	0.202466	0.10986	0.0995547	0.0624256	0.0392828	0.0247985		3.5074	3080.92	36.9775	41.5443	150.029	257.997	135.347	266.59	61.1844	294.149	14.3102	303.425	1.30953
															3	1746.87	26	50.1274	23.9793	0	0	74.1067		67.6422	32.3578	0	0	100	0.0163746	0.202244	0.109654	0.099366	0.0623014	0.0392013	0.0247452		3.244	3069.08	36.822	41.5262	148.68	257.576	133.963	266.08	60.0815	293.249	13.8777	302.311	1.2453
															3	1747.58	26.1	50.1244	23.8823	0	0	74.0067		67.7295	32.2705	0	0	100	0.016352	0.202022	0.109447	0.0991769	0.0621769	0.0391195	0.0246917		2.99974	3057.34	36.6667	41.5075	147.338	257.154	132.589	265.569	58.9948	292.351	13.4569	301.204	1.18402
															3	1748.3	26.2	50.1214	23.7853	0	0	73.9067		67.8171	32.1829	0	0	100	0.0163293	0.2018	0.109241	0.0989873	0.0620521	0.0390376	0.0246381		2.77327	3045.68	36.5118	41.4885	146.004	256.73	131.224	265.056	57.9243	291.456	13.0474	300.105	1.12555
															3	1749.01	26.3	50.1184	23.6883	0	0	73.8067		67.9049	32.0951	0	0	100	0.0163066	0.201576	0.109033	0.0987971	0.0619269	0.0389555	0.0245843		2.56334	3034.11	36.3571	41.469	144.678	256.304	129.868	264.542	56.8696	290.564	12.6491	299.012	1.06977
															3	1749.72	26.4	50.1154	23.5913	0	0	73.7067		67.993	32.007	0	0	100	0.0162838	0.201353	0.108825	0.0986064	0.0618014	0.0388731	0.0245304		2.36878	3022.62	36.2026	41.449	143.359	255.876	128.523	264.027	55.8307	289.675	12.2615	297.925	1.01658
															3	1750.44	26.5	50.1124	23.4943	0	0	73.6067		68.0813	31.9187	0	0	100	0.016261	0.201128	0.108616	0.0984152	0.0616755	0.0387905	0.0244763		2.1885	3011.22	36.0485	41.4286	142.049	255.446	127.187	263.51	54.8073	288.789	11.8846	296.846	0.96585
															3	1751.15	26.6	50.1094	23.3973	0	0	73.5067		68.1698	31.8302	0	0	100	0.0162381	0.200903	0.108407	0.0982235	0.0615493	0.0387077	0.0244221		2.0215	2999.91	35.8946	41.4078	140.746	255.015	125.86	262.993	53.7993	287.906	11.518	295.773	0.917486
															3	1751.87	26.7	50.1064	23.3003	0	0	73.4067		68.2586	31.7414	0	0	100	0.0162151	0.200677	0.108197	0.0980313	0.0614227	0.0386246	0.0243677		1.86682	2988.68	35.741	41.3866	139.45	254.582	124.543	262.474	52.8065	287.025	11.1614	294.707	0.871383
															3	1752.58	26.8	50.1034	23.2033	0	0	73.3067		68.3476	31.6524	0	0	100	0.016192	0.200451	0.107987	0.0978385	0.0612958	0.0385413	0.0243132		1.7236	2977.54	35.5877	41.365	138.163	254.148	123.235	261.955	51.8286	286.147	10.8147	293.648	0.827443
															3	1753.3	26.9	50.1004	23.1063	0	0	73.2067		68.4369	31.5631	0	0	100	0.0161689	0.200224	0.107776	0.0976452	0.0611686	0.0384578	0.0242585		1.591	2966.47	35.4346	41.3429	136.883	253.712	121.937	261.434	50.8657	285.273	10.4776	292.595	0.78557
															3	1754.01	27	50.0974	23.0093	0	0	73.1067		68.5264	31.4736	0	0	100	0.0161458	0.199997	0.107565	0.0974514	0.061041	0.0383741	0.0242037		1.46827	2955.49	35.2818	41.3205	135.611	253.275	120.648	260.913	49.9173	284.401	10.1499	291.549	0.745676
															3	1754.72	27.1	50.0944	22.9123	0	0	73.0067		68.6161	31.3839	0	0	100	0.0161225	0.199769	0.107352	0.0972571	0.0609131	0.0382901	0.0241488		1.3547	2944.59	35.1293	41.2976	134.346	252.836	119.369	260.39	48.9834	283.532	9.83129	290.51	0.707673
															3	1755.44	27.2	50.0914	22.8153	0	0	72.9067		68.7061	31.2939	0	0	100	0.0160992	0.19954	0.10714	0.0970622	0.0607848	0.0382059	0.0240936		1.24962	2933.77	34.9771	41.2744	133.089	252.395	118.099	259.867	48.0639	282.667	9.5216	289.477	0.671478
															3	1756.15	27.3	50.0884	22.7183	0	0	72.8067		68.7964	31.2036	0	0	100	0.0160759	0.199311	0.106927	0.0968668	0.0606561	0.0381215	0.0240384		1.15243	2923.03	34.8252	41.2508	131.84	251.954	116.838	259.343	47.1585	281.804	9.22061	288.45	0.637011
															3	1756.87	27.4	50.0854	22.6213	0	0	72.7067		68.8869	31.1131	0	0	100	0.0160525	0.199081	0.106713	0.0966708	0.0605271	0.0380368	0.023983		1.06256	2912.36	34.6735	41.2268	130.598	251.511	115.586	258.819	46.267	280.944	8.9281	287.43	0.604196
															3	1757.58	27.5	50.0824	22.5243	0	0	72.6067		68.9776	31.0224	0	0	100	0.016029	0.19885	0.106498	0.0964743	0.0603978	0.0379519	0.0239274		0.979461	2901.78	34.5221	41.2024	129.364	251.067	114.344	258.293	45.3894	280.088	8.64386	286.416	0.572959
															3	1758.3	27.6	50.0794	22.4273	0	0	72.5067		69.0686	30.9314	0	0	100	0.0160054	0.198619	0.106283	0.0962773	0.0602681	0.0378668	0.0238717		0.902651	2891.27	34.371	41.1776	128.137	250.621	113.11	257.767	44.5254	279.234	8.36769	285.409	0.543229
															3	1759.01	27.7	50.0764	22.3303	0	0	72.4067		69.1599	30.8401	0	0	100	0.0159818	0.198387	0.106068	0.0960797	0.060138	0.0377815	0.0238158		0.831669	2880.83	34.2202	41.1525	126.917	250.175	111.886	257.241	43.6748	278.384	8.09938	284.408	0.51494
															3	1759.72	27.8	50.0734	22.2333	0	0	72.3067		69.2514	30.7486	0	0	100	0.0159581	0.198154	0.105851	0.0958816	0.0600076	0.0376959	0.0237598		0.766086	2870.47	34.0697	41.127	125.706	249.727	110.671	256.713	42.8376	277.537	7.83874	283.413	0.488026
															3	1760.44	27.9	50.0704	22.1363	0	0	72.2067		69.3431	30.6569	0	0	100	0.0159344	0.197921	0.105635	0.0956829	0.0598768	0.03761	0.0237036		0.705507	2860.19	33.9194	41.1012	124.501	249.278	109.465	256.186	42.0135	276.693	7.58558	282.424	0.462425
															3	1761.15	28	50.0674	22.0393	0	0	72.1067		69.4351	30.5649	0	0	100	0.0159106	0.197687	0.105417	0.0954837	0.0597456	0.037524	0.0236472		0.649561	2849.97	33.7694	41.075	123.304	248.828	108.268	255.657	41.2024	275.851	7.3397	281.442	0.438078
															3	1761.87	28.1	50.0644	21.9423	0	0	72.0067		69.5274	30.4726	0	0	100	0.0158867	0.197453	0.105199	0.0952839	0.0596141	0.0374376	0.0235907		0.597908	2839.83	33.6197	41.0485	122.115	248.377	107.08	255.129	40.4041	275.014	7.10093	280.465	0.414928
															3	1762.58	28.2	50.0614	21.8453	0	0	71.9067		69.6199	30.3801	0	0	100	0.0158627	0.197217	0.104981	0.0950836	0.0594822	0.0373511	0.0235341		0.550229	2829.77	33.4702	41.0216	120.933	247.925	105.901	254.599	39.6185	274.179	6.86908	279.495	0.39292
															3	1763.3	28.3	50.0584	21.7483	0	0	71.8067		69.7127	30.2873	0	0	100	0.0158387	0.196982	0.104761	0.0948827	0.05935	0.0372643	0.0234773		0.506228	2819.77	33.3211	40.9944	119.758	247.473	104.731	254.07	38.8454	273.347	6.64399	278.531	0.372002
															3	1764.01	28.4	50.0554	21.6513	0	0	71.7067		69.8057	30.1943	0	0	100	0.0158147	0.196745	0.104542	0.0946813	0.0592174	0.0371773	0.0234203		0.465631	2809.84	33.1722	40.9669	118.591	247.019	103.57	253.54	38.0847	272.519	6.42546	277.573	0.352123
															3	1764.72	28.5	50.0524	21.5543	0	0	71.6067		69.899	30.101	0	0	100	0.0157905	0.196508	0.104321	0.0944792	0.0590844	0.03709	0.0233632		0.428184	2799.98	33.0236	40.939	117.431	246.564	102.417	253.01	37.3361	271.694	6.21335	276.621	0.333237
															3	1765.44	28.6	50.0494	21.4573	0	0	71.5067		69.9926	30.0074	0	0	100	0.0157663	0.19627	0.1041	0.0942767	0.058951	0.0370025	0.0233059		0.39365	2790.19	32.8753	40.9108	116.278	246.108	101.274	252.479	36.5996	270.872	6.00748	275.675	0.315296
															3	1766.15	28.7	50.0464	21.3603	0	0	71.4067		70.0864	29.9136	0	0	100	0.015742	0.196032	0.103878	0.0940735	0.0588173	0.0369147	0.0232484		0.361811	2780.47	32.7273	40.8823	115.133	245.652	100.139	251.948	35.875	270.053	5.80768	274.734	0.298257
															3	1766.87	28.8	50.0434	21.2633	0	0	71.3067		70.1805	29.8195	0	0	100	0.0157177	0.195793	0.103656	0.0938698	0.0586832	0.0368267	0.0231908		0.332464	2770.82	32.5795	40.8534	113.995	245.195	99.0129	251.417	35.1622	269.237	5.61382	273.8	0.282078
															3	1767.58	28.9	50.0404	21.1663	0	0	71.2067		70.2748	29.7252	0	0	100	0.0156932	0.195553	0.103433	0.0936655	0.0585487	0.0367384	0.023133		0.305419	2761.23	32.4321	40.8243	112.864	244.737	97.8955	250.886	34.461	268.425	5.42572	272.871	0.266718
															3	1768.3	29	50.0374	21.0693	0	0	71.1067		70.3694	29.6306	0	0	100	0.0156688	0.195312	0.10321	0.0934606	0.0584138	0.0366499	0.0230751		0.280503	2751.71	32.2849	40.7949	111.74	244.278	96.7867	250.355	33.7712	267.616	5.24324	271.948	0.252139
															3	1769.01	29.1	50.0344	20.9723	0	0	71.0067		70.4643	29.5357	0	0	100	0.0156442	0.195071	0.102985	0.0932552	0.0582786	0.0365612	0.023017		0.257554	2742.26	32.138	40.7651	110.624	243.819	95.6866	249.823	33.0927	266.81	5.06623	271.031	0.238305
															3	1769.72	29.2	50.0314	20.8753	0	0	70.9067		70.5594	29.4406	0	0	100	0.0156196	0.194829	0.102761	0.0930492	0.0581429	0.0364722	0.0229587		0.236421	2732.87	31.9913	40.7351	109.515	243.359	94.595	249.292	32.4254	266.007	4.89455	270.12	0.225179
															3	1770.44	29.3	50.0284	20.7783	0	0	70.8067		70.6549	29.3451	0	0	100	0.0155949	0.194587	0.102535	0.0928426	0.0580069	0.0363829	0.0229003		0.216966	2723.54	31.845	40.7047	108.413	242.899	93.512	248.76	31.7692	265.208	4.72805	269.214	0.212728
															3	1771.15	29.4	50.0254	20.6813	0	0	70.7067		70.7505	29.2495	0	0	100	0.0155701	0.194344	0.102309	0.0926354	0.0578705	0.0362934	0.0228417		0.19906	2714.28	31.6989	40.6741	107.318	242.438	92.4375	248.228	31.1238	264.411	4.56661	268.314	0.20092
															3	1771.87	29.5	50.0224	20.5843	0	0	70.6067		70.8465	29.1535	0	0	100	0.0155453	0.1941	0.102082	0.0924276	0.0577338	0.0362036	0.022783		0.182584	2705.08	31.5531	40.6432	106.23	241.976	91.3715	247.697	30.4891	263.619	4.41008	267.419	0.189724
															3	1772.58	29.6	50.0194	20.4873	0	0	70.5067		70.9427	29.0573	0	0	100	0.0155204	0.193855	0.101855	0.0922193	0.0575966	0.0361136	0.022724		0.167427	2695.94	31.4076	40.612	105.15	241.514	90.3139	247.165	29.865	262.829	4.25834	266.53	0.179111
															3	1773.3	29.7	50.0164	20.3903	0	0	70.4067		71.0392	28.9608	0	0	100	0.0154954	0.19361	0.101627	0.0920103	0.057459	0.0360233	0.0226649		0.153488	2686.86	31.2624	40.5805	104.076	241.051	89.2647	246.633	29.2515	262.042	4.11125	265.647	0.169052
															3	1774.01	29.8	50.0134	20.2933	0	0	70.3067		71.136	28.864	0	0	100	0.0154704	0.193364	0.101398	0.0918008	0.0573211	0.0359328	0.0226057		0.140671	2677.85	31.1175	40.5487	103.01	240.588	88.2239	246.102	28.6482	261.259	3.96869	264.769	0.15952
															3	1774.72	29.9	50.0104	20.1963	0	0	70.2067		71.2331	28.7669	0	0	100	0.0154452	0.193117	0.101169	0.0915906	0.0571827	0.035842	0.0225462		0.12889	2668.89	30.9728	40.5167	101.951	240.124	87.1915	245.57	28.0551	260.479	3.83053	263.896	0.150491
															3	1775.44	30	50.0074	20.0993	0	0	70.1067		71.3304	28.6696	0	0	100	0.0154201	0.19287	0.100939	0.0913799	0.057044	0.0357509	0.0224866		0.118064	2660	30.8285	40.4844	100.898	239.66	86.1673	245.039	27.4721	259.703	3.69667	263.029	0.141939
															3	1776.15	30.1	50.0044	20.0023	0	0	70.0067		71.428	28.572	0	0	100	0.0153948	0.192622	0.100708	0.0911685	0.0569049	0.0356596	0.0224269		0.108117	2651.16	30.6844	40.4519	99.8528	239.195	85.1514	244.508	26.899	258.929	3.56698	262.167	0.13384
															3	1776.87	30.2	50.0014	19.9053	0	0	69.9067		71.5259	28.4741	0	0	100	0.0153695	0.192373	0.100477	0.0909566	0.0567653	0.0355681	0.0223669		0.0989818	2642.38	30.5406	40.419	98.8145	238.73	84.1437	243.977	26.3358	258.159	3.44134	261.31	0.126174
															3	1777.58	30.3	49.9984	19.8083	0	0	69.8067		71.624	28.376	0	0	100	0.0153441	0.192123	0.100245	0.090744	0.0566254	0.0354762	0.0223068		0.0905931	2633.66	30.397	40.386	97.7831	238.265	83.1442	243.446	25.7821	257.392	3.31965	260.458	0.118917
															3	1778.3	30.4	49.9954	19.7113	0	0	69.7067		71.7225	28.2775	0	0	100	0.0153186	0.191873	0.100012	0.0905308	0.0564851	0.0353841	0.0222465		0.0828924	2625	30.2538	40.3526	96.7587	237.8	82.1528	242.915	25.238	256.628	3.2018	259.612	0.11205
															3	1779.01	30.5	49.9924	19.6143	0	0	69.6067		71.8212	28.1788	0	0	100	0.015293	0.191622	0.099779	0.0903171	0.0563443	0.0352918	0.0221861		0.075825	2616.39	30.1109	40.3191	95.7412	237.334	81.1696	242.385	24.7034	255.868	3.08768	258.771	0.105554
															3	1779.72	30.6	49.9894	19.5173	0	0	69.5067		71.9202	28.0798	0	0	100	0.0152674	0.191371	0.0995451	0.0901027	0.0562032	0.0351991	0.0221254		0.0693407	2607.84	29.9682	40.2852	94.7306	236.868	80.1944	241.855	24.178	255.111	2.97718	257.935	0.0994088
															3	1780.44	30.7	49.9864	19.4203	0	0	69.4067		72.0195	27.9805	0	0	100	0.0152417	0.191118	0.0993104	0.0898876	0.0560616	0.0351063	0.0220646		0.063393	2599.35	29.8258	40.2512	93.7269	236.402	79.2273	241.325	23.6617	254.357	2.87022	257.104	0.0935982
															3	1781.15	30.8	49.9834	19.3233	0	0	69.3067		72.1191	27.8809	0	0	100	0.0152159	0.190865	0.0990751	0.089672	0.0559197	0.0350131	0.0220037		0.0579389	2590.91	29.6837	40.2168	92.73	235.935	78.2682	240.796	23.1545	253.606	2.76668	256.279	0.0881048
															3	1781.87	30.9	49.9804	19.2263	0	0	69.2067		72.219	27.781	0	0	100	0.0151901	0.190611	0.0988391	0.0894558	0.0557773	0.0349197	0.0219425		0.0529389	2582.52	29.5419	40.1823	91.74	235.469	77.3171	240.267	22.6562	252.859	2.66647	255.458	0.0829125
															3	1782.58	31	49.9774	19.1293	0	0	69.1067		72.3191	27.6809	0	0	100	0.0151642	0.190357	0.0986024	0.0892389	0.0556345	0.034826	0.0218812		0.0483565	2574.19	29.4004	40.1475	90.7568	235.002	76.3739	239.738	22.1667	252.115	2.56949	254.642	0.078006
															3	1783.3	31.1	49.9744	19.0323	0	0	69.0067		72.4196	27.5804	0	0	100	0.0151382	0.190101	0.0983651	0.0890214	0.0554914	0.034732	0.0218196		0.0441579	2565.91	29.2591	40.1125	89.7804	234.535	75.4386	239.21	21.6858	251.374	2.47566	253.831	0.0733707
															3	1784.01	31.2	49.9714	18.9353	0	0	68.9067		72.5203	27.4797	0	0	100	0.0151121	0.189845	0.098127	0.0888032	0.0553477	0.0346377	0.021758		0.0403121	2557.69	29.1182	40.0773	88.8108	234.068	74.5112	238.682	21.2135	250.636	2.38489	253.025	0.0689927
															3	1784.72	31.3	49.9684	18.8383	0	0	68.8067		72.6214	27.3786	0	0	100	0.0150859	0.189588	0.0978883	0.0885844	0.0552037	0.0345432	0.0216961		0.0367903	2549.52	28.9775	40.0418	87.848	233.601	73.5916	238.154	20.7497	249.902	2.29709	252.224	0.0648587
															3	1785.44	31.4	49.9654	18.7413	0	0	68.7067		72.7227	27.2773	0	0	100	0.0150597	0.189331	0.0976488	0.088365	0.0550593	0.0344484	0.021634		0.0335664	2541.4	28.8371	40.0061	86.8919	233.133	72.6798	237.627	20.2941	249.17	2.21217	251.428	0.0609561
															3	1786.15	31.5	49.9624	18.6443	0	0	68.6067		72.8243	27.1757	0	0	100	0.0150334	0.189073	0.0974087	0.088145	0.0549144	0.0343534	0.0215718		0.0306158	2533.33	28.697	39.9702	85.9425	232.666	71.7758	237.101	19.8467	248.442	2.13005	250.637	0.0572729
															3	1786.87	31.6	49.9594	18.5473	0	0	68.5067		72.9263	27.0737	0	0	100	0.015007	0.188814	0.0971679	0.0879243	0.0547691	0.034258	0.0215094		0.0279162	2525.32	28.5572	39.9341	84.9998	232.199	70.8794	236.575	19.4075	247.718	2.05064	249.85	0.0537975
															3	1787.58	31.7	49.9564	18.4503	0	0	68.4067		73.0285	26.9715	0	0	100	0.0149806	0.188554	0.0969263	0.0877029	0.0546234	0.0341624	0.0214468		0.025447	2517.35	28.4177	39.8978	84.0637	231.732	69.9908	236.049	18.9762	246.996	1.97388	249.068	0.0505191
															3	1788.3	31.8	49.9534	18.3533	0	0	68.3067		73.131	26.869	0	0	100	0.014954	0.188293	0.0966841	0.0874809	0.0544773	0.0340665	0.021384		0.0231891	2509.43	28.2784	39.8612	83.1344	231.264	69.1098	235.524	18.5527	246.278	1.89968	248.291	0.0474274
															3	1789.01	31.9	49.9504	18.2563	0	0	68.2067		73.2338	26.7662	0	0	100	0.0149274	0.188032	0.0964411	0.0872583	0.0543307	0.0339703	0.021321		0.0211251	2501.57	28.1395	39.8245	82.2116	230.797	68.2365	235	18.137	245.562	1.82797	247.518	0.0445124
															3	1789.72	32	49.9474	18.1593	0	0	68.1067		73.337	26.663	0	0	100	0.0149007	0.18777	0.0961974	0.087035	0.0541837	0.0338738	0.0212579		0.0192389	2493.75	28.0008	39.7875	81.2955	230.33	67.3707	234.476	17.7289	244.85	1.75867	246.75	0.0417648
															3	1790.44	32.1	49.9444	18.0623	0	0	68.0067		73.4404	26.5596	0	0	100	0.014874	0.187507	0.095953	0.086811	0.0540363	0.0337771	0.0211946		0.0175157	2485.98	27.8625	39.7504	80.3859	229.863	66.5124	233.953	17.3283	244.142	1.69172	245.987	0.0391756
															3	1791.15	32.2	49.9414	17.9653	0	0	67.9067		73.5441	26.4559	0	0	100	0.0148471	0.187243	0.0957079	0.0865864	0.0538884	0.03368	0.021131		0.0159419	2478.26	27.7244	39.713	79.483	229.396	65.6617	233.43	16.9352	243.436	1.62704	245.228	0.0367364
															3	1791.87	32.3	49.9384	17.8683	0	0	67.8067		73.6481	26.3519	0	0	100	0.0148202	0.186979	0.0954621	0.0863612	0.0537401	0.0335827	0.0210673		0.0145049	2470.59	27.5866	39.6755	78.5865	228.929	64.8185	232.908	16.5494	242.734	1.56457	244.473	0.0344391
															3	1792.58	32.4	49.9354	17.7713	0	0	67.7067		73.7525	26.2475	0	0	100	0.0147932	0.186714	0.0952155	0.0861352	0.0535914	0.0334851	0.0210034		0.0131933	2462.96	27.4491	39.6378	77.6966	228.462	63.9826	232.387	16.1708	242.034	1.50423	243.724	0.032276
															3	1793.3	32.5	49.9324	17.6743	0	0	67.6067		73.8571	26.1429	0	0	100	0.0147661	0.186448	0.0949682	0.0859086	0.0534422	0.0333872	0.0209393		0.0119964	2455.38	27.3118	39.5998	76.8133	227.995	63.1542	231.866	15.7992	241.338	1.44597	242.978	0.0302398
															3	1794.01	32.6	49.9294	17.5773	0	0	67.5067		73.9621	26.0379	0	0	100	0.0147389	0.186181	0.0947202	0.0856813	0.0532926	0.033289	0.0208751		0.0109047	2447.85	27.1749	39.5617	75.9363	227.529	62.3332	231.346	15.4347	240.645	1.38973	242.237	0.0283237
															3	1794.72	32.7	49.9264	17.4803	0	0	67.4067		74.0674	25.9326	0	0	100	0.0147117	0.185913	0.0944715	0.0854534	0.0531425	0.0331905	0.0208106		0.00990908	2440.37	27.0383	39.5234	75.0659	227.063	61.5195	230.827	15.0771	239.955	1.33543	241.5	0.026521
															3	1795.44	32.8	49.9234	17.3833	0	0	67.3067		74.173	25.827	0	0	100	0.0146844	0.185645	0.094222	0.0852248	0.052992	0.0330917	0.0207459		0.00900146	2432.93	26.9019	39.4849	74.2019	226.597	60.713	230.308	14.7262	239.269	1.28303	240.768	0.0248254
															3	1796.15	32.9	49.9204	17.2863	0	0	67.2067		74.2789	25.7211	0	0	100	0.014657	0.185376	0.0939717	0.0849954	0.052841	0.0329926	0.0206811		0.0081743	2425.53	26.7658	39.4463	73.3443	226.131	59.9139	229.79	14.3821	238.585	1.23246	240.04	0.0232312
															3	1796.87	33	49.9174	17.1893	0	0	67.1067		74.3851	25.6149	0	0	100	0.0146295	0.185106	0.0937207	0.0847654	0.0526896	0.0328933	0.0206161		0.00742071	2418.18	26.6301	39.4075	72.4931	225.665	59.1219	229.273	14.0445	237.905	1.18367	239.316	0.0217326
															3	1797.58	33.1	49.9144	17.0923	0	0	67.0067		74.4916	25.5084	0	0	100	0.0146019	0.184835	0.093469	0.0845348	0.0525378	0.0327936	0.0205508		0.00673436	2410.88	26.4946	39.3684	71.6483	225.2	58.3372	228.757	13.7135	237.227	1.13661	238.596	0.0203244
															3	1798.3	33.2	49.9114	16.9953	0	0	66.9067		74.5985	25.4015	0	0	100	0.0145742	0.184563	0.0932165	0.0843034	0.0523854	0.0326937	0.0204854		0.00610945	2403.61	26.3594	39.3293	70.8099	224.735	57.5596	228.241	13.3888	236.553	1.09121	237.881	0.0190014
															3	1799.01	33.3	49.9084	16.8983	0	0	66.8067		74.7056	25.2944	0	0	100	0.0145465	0.184291	0.0929633	0.0840713	0.0522327	0.0325934	0.0204198		0.00554067	2396.4	26.2245	39.2899	69.9777	224.27	56.7891	227.726	13.0704	235.882	1.04743	237.17	0.0177589
															3	1799.72	33.4	49.9054	16.8013	0	0	66.7067		74.8131	25.1869	0	0	100	0.0145187	0.184018	0.0927093	0.0838386	0.0520794	0.0324928	0.0203539		0.00502314	2389.22	26.0899	39.2504	69.1519	223.806	56.0258	227.212	12.7583	235.214	1.00522	236.463	0.0165923
															3	1800.44	33.5	49.9024	16.7043	0	0	66.6067		74.921	25.079	0	0	100	0.0144908	0.183744	0.0924545	0.0836051	0.0519257	0.032392	0.0202879		0.0045524	2382.09	25.9555	39.2107	68.3324	223.342	55.2694	226.699	12.4522	234.549	0.964524	235.76	0.0154973
															3	1801.15	33.6	49.8994	16.6073	0	0	66.5067		75.0291	24.9709	0	0	100	0.0144628	0.183469	0.092199	0.083371	0.0517716	0.0322908	0.0202217		0.00412436	2375	25.8215	39.1708	67.5192	222.878	54.5201	226.186	12.1522	233.887	0.9253	235.061	0.0144699
															3	1801.87	33.7	49.8964	16.5103	0	0	66.4067		75.1376	24.8624	0	0	100	0.0144347	0.183193	0.0919427	0.0831361	0.051617	0.0321893	0.0201553		0.00373528	2367.95	25.6878	39.1308	66.7122	222.415	53.7778	225.675	11.8581	233.228	0.887499	234.366	0.0135061
															3	1802.58	33.8	49.8934	16.4133	0	0	66.3067		75.2464	24.7536	0	0	100	0.0144066	0.182917	0.0916856	0.0829005	0.0514619	0.0320876	0.0200886		0.00338172	2360.95	25.5543	39.0907	65.9114	221.952	53.0424	225.164	11.5698	232.573	0.851075	233.675	0.0126023
															3	1803.3	33.9	49.8904	16.3163	0	0	66.2067		75.3555	24.6445	0	0	100	0.0143783	0.182639	0.0914278	0.0826642	0.0513063	0.0319855	0.0200218		0.00306056	2353.98	25.4211	39.0503	65.1168	221.489	52.3139	224.654	11.2873	231.92	0.815986	232.988	0.011755
															3	1804.01	34	49.8874	16.2193	0	0	66.1067		75.4649	24.5351	0	0	100	0.01435	0.182361	0.0911691	0.0824272	0.0511503	0.0318831	0.0199548		0.00276893	2347.06	25.2883	39.0099	64.3285	221.027	51.5923	224.145	11.0104	231.27	0.782187	232.305	0.010961
															3	1804.72	34.1	49.8844	16.1223	0	0	66.0067		75.5747	24.4253	0	0	100	0.0143216	0.182082	0.0909097	0.0821895	0.0509938	0.0317804	0.0198876		0.00250419	2340.18	25.1557	38.9692	63.5463	220.565	50.8775	223.637	10.7391	230.623	0.749638	231.626	0.0102171
															3	1805.44	34.2	49.8814	16.0253	0	0	65.9067		75.6848	24.3152	0	0	100	0.0142931	0.181802	0.0906495	0.0819511	0.0508369	0.0316774	0.0198201		0.00226395	2333.33	25.0234	38.9285	62.7702	220.103	50.1695	223.13	10.4733	229.98	0.718297	230.951	0.00952034
															3	1806.15	34.3	49.8784	15.9283	0	0	65.8067		75.7953	24.2047	0	0	100	0.0142645	0.181521	0.0903885	0.0817119	0.0506794	0.031574	0.0197525		0.00204602	2326.53	24.8914	38.8875	62.0002	219.643	49.4683	222.623	10.2129	229.339	0.688126	230.28	0.00886802
															3	1806.87	34.4	49.8754	15.8313	0	0	65.7067		75.9061	24.0939	0	0	100	0.0142358	0.18124	0.0901267	0.081472	0.0505215	0.0314704	0.0196847		0.0018484	2319.77	24.7597	38.8465	61.2364	219.182	48.7739	222.118	9.95779	228.701	0.659085	229.612	0.00825748
															3	1807.58	34.5	49.8724	15.7343	0	0	65.6067		76.0172	23.9828	0	0	100	0.014207	0.180957	0.0898641	0.0812314	0.0503631	0.0313664	0.0196166		0.00166926	2313.04	24.6283	38.8053	60.4786	218.722	48.0861	221.614	9.7079	228.066	0.631138	228.949	0.00768622
															3	1808.3	34.6	49.8694	15.6373	0	0	65.5067		76.1287	23.8713	0	0	100	0.0141782	0.180674	0.0896008	0.08099	0.0502042	0.0312622	0.0195483		0.00150693	2306.36	24.4972	38.7639	59.7269	218.263	47.405	221.11	9.46315	227.435	0.604249	228.289	0.00715191
															3	1809.01	34.7	49.8664	15.5403	0	0	65.4067		76.2405	23.7595	0	0	100	0.0141493	0.18039	0.0893366	0.0807479	0.0500448	0.0311576	0.0194799		0.00135987	2299.71	24.3664	38.7224	58.9812	217.803	46.7305	220.608	9.22346	226.806	0.578382	227.632	0.00665231
															3	1809.72	34.8	49.8634	15.4433	0	0	65.3067		76.3526	23.6474	0	0	100	0.0141202	0.180105	0.0890716	0.0805051	0.049885	0.0310527	0.0194112		0.00122671	2293.1	24.2359	38.6808	58.2415	217.345	46.0626	220.106	8.98876	226.18	0.553503	226.98	0.00618533
															3	1810.44	34.9	49.8604	15.3463	0	0	65.2067		76.4651	23.5349	0	0	100	0.0140911	0.179819	0.0888058	0.0802615	0.0497246	0.0309474	0.0193423		0.00110617	2286.53	24.1057	38.639	57.5079	216.887	45.4013	219.605	8.75894	225.557	0.52958	226.331	0.005749
															3	1811.15	35	49.8574	15.2493	0	0	65.1067		76.578	23.422	0	0	100	0.0140619	0.179532	0.0885391	0.0800172	0.0495638	0.0308419	0.0192732		0.000997101	2280	23.9757	38.5971	56.7801	216.43	44.7465	219.106	8.53395	224.937	0.506579	225.686	0.00534144
															3	1811.87	35.1	49.8544	15.1523	0	0	65.0067		76.6911	23.3089	0	0	100	0.0140326	0.179244	0.0882717	0.0797721	0.0494024	0.030736	0.0192039		0.000898441	2273.5	23.8461	38.5551	56.0584	215.973	44.0982	218.607	8.3137	224.32	0.48447	225.044	0.00496089
															3	1812.58	35.2	49.8514	15.0553	0	0	64.9067		76.8047	23.1953	0	0	100	0.0140032	0.178956	0.0880034	0.0795263	0.0492406	0.0306298	0.0191344		0.000809231	2267.05	23.7168	38.5129	55.3425	215.516	43.4564	218.11	8.09811	223.705	0.463222	224.406	0.00460568
															3	1813.3	35.3	49.8484	14.9583	0	0	64.8067		76.9186	23.0814	0	0	100	0.0139738	0.178666	0.0877343	0.0792797	0.0490782	0.0305232	0.0190646		0.000728597	2260.62	23.5877	38.4707	54.6326	215.061	42.8209	217.613	7.8871	223.094	0.442806	223.772	0.00427425
															3	1814.01	35.4	49.8454	14.8613	0	0	64.7067		77.0328	22.9672	0	0	100	0.0139442	0.178376	0.0874644	0.0790323	0.0489154	0.0304164	0.0189947		0.000655742	2254.24	23.459	38.4283	53.9285	214.605	42.1919	217.118	7.6806	222.486	0.423193	223.141	0.00396512
															3	1814.72	35.5	49.8424	14.7643	0	0	64.6067		77.1474	22.8526	0	0	100	0.0139145	0.178085	0.0871936	0.0787842	0.0487521	0.0303092	0.0189245		0.000589939	2247.89	23.3305	38.3857	53.2304	214.151	41.5692	216.623	7.47854	221.88	0.404356	222.513	0.00367689
															3	1815.44	35.6	49.8394	14.6673	0	0	64.5067		77.2623	22.7377	0	0	100	0.0138848	0.177793	0.086922	0.0785353	0.0485882	0.0302016	0.0188541		0.00053053	2241.57	23.2024	38.3431	52.538	213.697	40.9528	216.13	7.28083	221.277	0.386266	221.889	0.00340825
															3	1816.15	35.7	49.8364	14.5703	0	0	64.4067		77.3776	22.6224	0	0	100	0.013855	0.1775	0.0866495	0.0782856	0.0484238	0.0300938	0.0187835		0.000476913	2235.29	23.0745	38.3003	51.8515	213.243	40.3427	215.637	7.08741	220.677	0.3689	221.269	0.00315796
															3	1816.87	35.8	49.8334	14.4733	0	0	64.3067		77.4933	22.5067	0	0	100	0.013825	0.177206	0.0863762	0.0780352	0.048259	0.0299856	0.0187127		0.000428542	2229.05	22.9469	38.2574	51.1707	212.791	39.7389	215.146	6.89821	220.08	0.35223	220.652	0.00292485
															3	1817.58	35.9	49.8304	14.3763	0	0	64.2067		77.6093	22.3907	0	0	100	0.013795	0.176911	0.0861021	0.077784	0.0480936	0.029877	0.0186417		0.000384921	2222.84	22.8197	38.2144	50.4957	212.339	39.1412	214.656	6.71315	219.486	0.336233	220.038	0.00270784
															3	1818.3	36	49.8274	14.2793	0	0	64.1067		77.7257	22.2743	0	0	100	0.0137649	0.176615	0.0858271	0.077532	0.0479277	0.0297682	0.0185704		0.000345599	2216.67	22.6927	38.1713	49.8265	211.887	38.5498	214.166	6.53216	218.894	0.320884	219.428	0.00250588
															3	1819.01	36.1	49.8244	14.1823	0	0	64.0067		77.8424	22.1576	0	0	100	0.0137347	0.176318	0.0855512	0.0772792	0.0477613	0.0296589	0.0184989		0.000310166	2210.53	22.566	38.1281	49.163	211.437	37.9644	213.678	6.35517	218.305	0.306161	218.821	0.002318
															3	1819.72	36.2	49.8214	14.0853	0	0	63.9067		77.9596	22.0404	0	0	100	0.0137043	0.17602	0.0852745	0.0770256	0.0475943	0.0295494	0.0184272		0.000278251	2204.42	22.4397	38.0847	48.5053	210.986	37.3852	213.191	6.18212	217.719	0.292041	218.217	0.00214329
															3	1820.44	36.3	49.8184	13.9883	0	0	63.8067		78.077	21.923	0	0	100	0.0136739	0.175722	0.0849969	0.0767712	0.0474269	0.0294395	0.0183552		0.000249516	2198.35	22.3136	38.0413	47.8532	210.537	36.8121	212.705	6.01293	217.136	0.278502	217.617	0.0019809
															3	1821.15	36.4	49.8154	13.8913	0	0	63.7067		78.1949	21.8051	0	0	100	0.0136434	0.175422	0.0847184	0.076516	0.0472589	0.0293292	0.0182831		0.000223653	2192.31	22.1878	37.9977	47.2067	210.088	36.245	212.221	5.84754	216.556	0.265524	217.02	0.00183002
															3	1821.87	36.5	49.8124	13.7943	0	0	63.6067		78.3131	21.6869	0	0	100	0.0136128	0.175122	0.0844391	0.07626	0.0470904	0.0292186	0.0182107		0.000200387	2186.3	22.0623	37.9541	46.5659	209.64	35.6839	211.737	5.68589	215.978	0.253086	216.426	0.00168988
															3	1822.58	36.6	49.8094	13.6973	0	0	63.5067		78.4317	21.5683	0	0	100	0.0135821	0.17482	0.0841588	0.0760033	0.0469213	0.0291077	0.0181381		0.000179464	2180.33	21.9372	37.9103	45.9308	209.193	35.1288	211.254	5.5279	215.403	0.241168	215.835	0.00155977
															3	1823.3	36.7	49.8064	13.6003	0	0	63.4067		78.5507	21.4493	0	0	100	0.0135514	0.174518	0.0838777	0.0757457	0.0467517	0.0289964	0.0180652		0.000160656	2174.39	21.8123	37.8665	45.3012	208.746	34.5796	210.773	5.37351	214.831	0.229751	215.248	0.00143904
															3	1824.01	36.8	49.8034	13.5033	0	0	63.3067		78.67	21.33	0	0	100	0.0135205	0.174215	0.0835957	0.0754872	0.0465816	0.0288848	0.0179921		0.000143757	2168.48	21.6877	37.8225	44.6772	208.301	34.0363	210.293	5.22265	214.261	0.218816	214.663	0.00132704
															3	1824.72	36.9	49.8004	13.4063	0	0	63.2067		78.7897	21.2103	0	0	100	0.0134895	0.17391	0.0833129	0.075228	0.046411	0.0287728	0.0179188		0.000128579	2162.6	21.5634	37.7784	44.0587	207.855	33.4989	209.814	5.07528	213.694	0.208347	214.082	0.0012232
															3	1825.44	37	49.7974	13.3093	0	0	63.1067		78.9098	21.0902	0	0	100	0.0134584	0.173605	0.0830291	0.074968	0.0462398	0.0286604	0.0178453		0.000114953	2156.76	21.4394	37.7343	43.4458	207.411	32.9673	209.336	4.93131	213.13	0.198324	213.504	0.00112696
															3	1826.15	37.1	49.7944	13.2123	0	0	63.0067		79.0303	20.9697	0	0	100	0.0134272	0.173299	0.0827444	0.0747071	0.046068	0.0285477	0.0177715		0.000102725	2150.94	21.3157	37.69	42.8384	206.968	32.4416	208.859	4.79069	212.568	0.188733	212.929	0.0010378
															3	1826.87	37.2	49.7914	13.1153	0	0	62.9067		79.1512	20.8488	0	0	100	0.0133959	0.172992	0.0824588	0.0744454	0.0458957	0.0284346	0.0176975		9.1757e-05	2145.16	21.1924	37.6457	42.2365	206.525	31.9215	208.383	4.65337	212.009	0.179555	212.357	0.000955237
															3	1827.58	37.3	49.7884	13.0183	0	0	62.8067		79.2724	20.7276	0	0	100	0.0133646	0.172684	0.0821723	0.0741828	0.0457229	0.0283212	0.0176232		8.19229e-05	2139.41	21.0693	37.6012	41.64	206.083	31.4073	207.909	4.51927	211.453	0.170776	211.788	0.000878818
															3	1828.3	37.4	49.7854	12.9213	0	0	62.7067		79.394	20.606	0	0	100	0.0133331	0.172374	0.0818849	0.0739195	0.0455495	0.0282074	0.0175488		7.31094e-05	2133.69	20.9465	37.5567	41.049	205.641	30.8987	207.436	4.38835	210.9	0.16238	211.222	0.000808118
															3	1829.01	37.5	49.7824	12.8243	0	0	62.6067		79.5161	20.4839	0	0	100	0.0133015	0.172064	0.0815966	0.0736553	0.0453756	0.0280933	0.017474		6.52141e-05	2128	20.824	37.5121	40.4634	205.201	30.3958	206.963	4.26053	210.349	0.154353	210.66	0.000742739
															3	1829.72	37.6	49.7794	12.7273	0	0	62.5067		79.6385	20.3615	0	0	100	0.0132698	0.171753	0.0813073	0.0733902	0.0452011	0.0279788	0.0173991		5.81445e-05	2122.34	20.7019	37.4674	39.8833	204.761	29.8985	206.492	4.13578	209.8	0.146681	210.1	0.000682308
															3	1830.44	37.7	49.7764	12.6303	0	0	62.4067		79.7613	20.2387	0	0	100	0.013238	0.171441	0.0810171	0.0731243	0.045026	0.0278639	0.0173239		5.18172e-05	2116.71	20.58	37.4226	39.3084	204.322	29.4068	206.023	4.01402	209.254	0.139349	209.543	0.000626476
															3	1831.15	37.8	49.7734	12.5333	0	0	62.3067		79.8845	20.1155	0	0	100	0.0132062	0.171128	0.080726	0.0728575	0.0448504	0.0277486	0.0172484		4.61566e-05	2111.11	20.4584	37.3777	38.739	203.884	28.9206	205.554	3.8952	208.711	0.132344	208.989	0.000574918
															3	1831.87	37.9	49.7704	12.4363	0	0	62.2067		80.0081	19.9919	0	0	100	0.0131742	0.170814	0.080434	0.0725899	0.0446742	0.027633	0.0171727		4.10949e-05	2105.54	20.3371	37.3327	38.1748	203.447	28.44	205.087	3.77926	208.17	0.125654	208.438	0.000527331
															3	1832.58	38	49.7674	12.3393	0	0	62.1067		80.1321	19.8679	0	0	100	0.0131421	0.170499	0.080141	0.0723214	0.0444975	0.027517	0.0170968		3.65708e-05	2100	20.2162	37.2877	37.616	203.011	27.9649	204.621	3.66616	207.632	0.119266	207.889	0.000483428
															3	1833.3	38.1	49.7644	12.2423	0	0	62.0067		80.2565	19.7435	0	0	100	0.0131099	0.170182	0.079847	0.0720521	0.0443202	0.0274006	0.0170206		3.2529e-05	2094.49	20.0955	37.2426	37.0625	202.575	27.4952	204.156	3.55584	207.096	0.113168	207.344	0.000442945
															3	1834.01	38.2	49.7614	12.1453	0	0	61.9067		80.3812	19.6188	0	0	100	0.0130776	0.169865	0.0795521	0.0717818	0.0441423	0.0272839	0.0169442		2.89199e-05	2089.01	19.9751	37.1974	36.5142	202.14	27.031	203.692	3.44824	206.563	0.107348	206.802	0.000405634
															3	1834.72	38.3	49.7584	12.0483	0	0	61.8067		80.5064	19.4936	0	0	100	0.0130452	0.169547	0.0792563	0.0715107	0.0439638	0.0271668	0.0168675		2.56986e-05	2083.55	19.8551	37.1521	35.9712	201.707	26.5721	203.23	3.34332	206.033	0.101796	206.262	0.000371264
															3	1835.44	38.4	49.7554	11.9513	0	0	61.7067		80.6321	19.3679	0	0	100	0.0130127	0.169228	0.0789595	0.0712388	0.0437848	0.0270493	0.0167906		2.28248e-05	2078.12	19.7353	37.1067	35.4334	201.274	26.1187	202.769	3.24101	205.505	0.0965008	205.725	0.000339619
															3	1836.15	38.5	49.7524	11.8543	0	0	61.6067		80.7581	19.2419	0	0	100	0.0129801	0.168907	0.0786618	0.0709659	0.0436051	0.0269314	0.0167135		2.02623e-05	2072.73	19.6159	37.0613	34.9008	200.841	25.6705	202.309	3.14127	204.979	0.0914513	205.191	0.000310498
															3	1836.87	38.6	49.7494	11.7573	0	0	61.5067		80.8845	19.1155	0	0	100	0.0129473	0.168586	0.078363	0.0706922	0.0434249	0.0268131	0.0166361		1.79784e-05	2067.36	19.4967	37.0158	34.3733	200.41	25.2276	201.85	3.04406	204.456	0.0866379	204.66	0.000283713
															3	1837.58	38.7	49.7464	11.6603	0	0	61.4067		81.0113	18.9887	0	0	100	0.0129145	0.168264	0.0780633	0.0704175	0.0432441	0.0266945	0.0165584		1.59439e-05	2062.02	19.3779	36.9702	33.8511	199.98	24.79	201.392	2.94931	203.935	0.0820508	204.131	0.000259091
															3	1838.3	38.8	49.7434	11.5633	0	0	61.3067		81.1386	18.8614	0	0	100	0.0128816	0.16794	0.0777626	0.070142	0.0430627	0.0265754	0.0164805		1.41324e-05	2056.7	19.2594	36.9246	33.3339	199.55	24.3576	200.936	2.85698	203.417	0.0776808	203.605	0.000236469
															3	1839.01	38.9	49.7404	11.4663	0	0	61.2067		81.2662	18.7338	0	0	100	0.0128485	0.167616	0.077461	0.0698656	0.0428808	0.026456	0.0164023		1.25202e-05	2051.41	19.1411	36.8789	32.8219	199.122	23.9304	200.481	2.76703	202.901	0.0735187	203.082	0.000215695
															3	1839.72	39	49.7374	11.3693	0	0	61.1067		81.3943	18.6057	0	0	100	0.0128154	0.16729	0.0771583	0.0695882	0.0426982	0.0263362	0.0163239		1.10862e-05	2046.15	19.0232	36.8331	32.3149	198.694	23.5083	200.027	2.6794	202.388	0.0695558	202.561	0.000196629
															3	1840.44	39.1	49.7344	11.2723	0	0	61.0067		81.5228	18.4772	0	0	100	0.0127821	0.166964	0.0768547	0.06931	0.042515	0.026216	0.0162452		9.81125e-06	2040.92	18.9056	36.7872	31.813	198.267	23.0914	199.575	2.59405	201.877	0.0657839	202.043	0.000179141
															3	1841.15	39.2	49.7314	11.1753	0	0	60.9067		81.6517	18.3483	0	0	100	0.0127488	0.166636	0.0765501	0.0690308	0.0423312	0.0260954	0.0161662		8.67835e-06	2035.71	18.7883	36.7413	31.3161	197.841	22.6795	199.123	2.51093	201.368	0.0621947	201.528	0.000163108
															3	1841.87	39.3	49.7284	11.0783	0	0	60.8067		81.7811	18.2189	0	0	100	0.0127153	0.166307	0.0762444	0.0687507	0.0421469	0.0259744	0.016087		7.67218e-06	2030.53	18.6713	36.6953	30.8243	197.416	22.2727	198.673	2.43	200.862	0.0587805	201.016	0.000148419
															3	1842.58	39.4	49.7254	10.9813	0	0	60.7067		81.9109	18.0891	0	0	100	0.0126817	0.165977	0.0759378	0.0684697	0.0419619	0.0258529	0.0160075		6.77899e-06	2025.38	18.5546	36.6493	30.3375	196.992	21.8709	198.225	2.35121	200.358	0.0555338	200.505	0.000134968
															3	1843.3	39.5	49.7224	10.8843	0	0	60.6067		82.0411	17.9589	0	0	100	0.012648	0.165646	0.0756301	0.0681878	0.0417763	0.0257311	0.0159278		5.98655e-06	2020.25	18.4382	36.6032	29.8556	196.569	21.4742	197.777	2.27452	199.857	0.0524474	199.998	0.000122658
															3	1844.01	39.6	49.7194	10.7873	0	0	60.5067		82.1717	17.8283	0	0	100	0.0126142	0.165314	0.0753214	0.0679049	0.0415901	0.0256089	0.0158478		5.28384e-06	2015.15	18.3221	36.557	29.3787	196.147	21.0823	197.331	2.19988	199.358	0.0495143	199.493	0.000111399
															3	1844.72	39.7	49.7164	10.6903	0	0	60.4067		82.3028	17.6972	0	0	100	0.0125803	0.164981	0.0750117	0.0676212	0.0414032	0.0254863	0.0157676		4.66103e-06	2010.08	18.2064	36.5108	28.9067	195.726	20.6954	196.886	2.12725	198.861	0.0467278	198.991	0.000101107
															3	1845.44	39.8	49.7134	10.5933	0	0	60.3067		82.4343	17.5657	0	0	100	0.0125462	0.164647	0.074701	0.0673364	0.0412158	0.0253633	0.015687		4.10934e-06	2005.03	18.0909	36.4645	28.4396	195.305	20.3134	196.442	2.05659	198.366	0.0440815	198.491	9.17061e-05
															3	1846.15	39.9	49.7104	10.4963	0	0	60.2067		82.5662	17.4338	0	0	100	0.0125121	0.164312	0.0743893	0.0670507	0.0410277	0.0252399	0.0156062		3.62091e-06	2000	17.9757	36.4182	27.9773	194.886	19.9362	196	1.98786	197.874	0.0415691	197.993	8.31233e-05
															3	1846.87	40	49.7074	10.3993	0	0	60.1067		82.6986	17.3014	0	0	100	0.0124778	0.163975	0.0740765	0.0667641	0.040839	0.0251161	0.0155252		3.18873e-06	1995	17.8609	36.3718	27.52	194.468	19.5638	195.559	1.92102	197.384	0.0391847	197.499	7.52926e-05
															3	1847.58	40.1	49.7044	10.3023	0	0	60.0067		82.8314	17.1686	0	0	100	0.0124435	0.163638	0.0737626	0.0664765	0.0406497	0.0249918	0.0154438		2.80652e-06	1990.02	17.7464	36.3253	27.0675	194.05	19.1962	195.119	1.85602	196.897	0.0369226	197.006	6.81526e-05
															3	1848.3	40.2	49.7014	10.2053	0	0	59.9067		82.9646	17.0354	0	0	100	0.012409	0.163299	0.0734477	0.066188	0.0404597	0.0248671	0.0153622		2.4687e-06	1985.07	17.6321	36.2788	26.6198	193.634	18.8334	194.681	1.79283	196.411	0.0347772	196.516	6.16466e-05
															3	1849.01	40.3	49.6984	10.1083	0	0	59.8067		83.0983	16.9017	0	0	100	0.0123744	0.162959	0.0731318	0.0658984	0.0402691	0.0247421	0.0152804		2.17025e-06	1980.15	17.5182	36.2323	26.1768	193.218	18.4753	194.243	1.7314	195.928	0.0327433	196.029	5.57223e-05
															3	1849.72	40.4	49.6954	10.0113	0	0	59.7067		83.2325	16.7675	0	0	100	0.0123396	0.162618	0.0728148	0.065608	0.0400779	0.0246166	0.0151982		1.90677e-06	1975.25	17.4046	36.1857	25.7387	192.804	18.1219	193.807	1.6717	195.447	0.0308157	195.543	5.03311e-05
															3	1850.44	40.5	49.6924	9.91432	0	0	59.6067		83.3671	16.6329	0	0	100	0.0123048	0.162276	0.0724967	0.0653165	0.039886	0.0244906	0.0151158		1.67431e-06	1970.37	17.2913	36.139	25.3053	192.39	17.7731	193.373	1.6137	194.969	0.0289895	195.061	4.54283e-05
															3	1851.15	40.6	49.6894	9.81732	0	0	59.5067		83.5022	16.4978	0	0	100	0.0122698	0.161933	0.0721776	0.0650241	0.0396935	0.0243643	0.0150331		1.46928e-06	1965.52	17.1783	36.0923	24.8766	191.977	17.429	192.939	1.55734	194.492	0.0272602	194.58	4.09729e-05
															3	1851.87	40.7	49.6864	9.72032	0	0	59.4067		83.6377	16.3623	0	0	100	0.0122348	0.161588	0.0718574	0.0647306	0.0395004	0.0242375	0.0149501		1.28858e-06	1960.69	17.0656	36.0456	24.4526	191.566	17.0894	192.507	1.50261	194.018	0.025623	194.102	3.69267e-05
															3	1852.58	40.8	49.6834	9.62332	0	0	59.3067		83.7736	16.2264	0	0	100	0.0121996	0.161243	0.0715361	0.0644362	0.0393065	0.0241103	0.0148668		1.12941e-06	1955.88	16.9533	35.9988	24.0333	191.155	16.7544	192.077	1.44945	193.546	0.0240738	193.627	3.32548e-05
															3	1853.3	40.9	49.6804	9.52632	0	0	59.2067		83.9101	16.0899	0	0	100	0.0121643	0.160896	0.0712138	0.0641408	0.0391121	0.0239827	0.0147833		9.893e-07	1951.1	16.8412	35.9519	23.6186	190.745	16.4239	191.647	1.39784	193.076	0.0226084	193.153	2.99249e-05
															3	1854.01	41	49.6774	9.42932	0	0	59.1067		84.0469	15.9531	0	0	100	0.0121288	0.160548	0.0708903	0.0638444	0.0389169	0.0238546	0.0146995		8.66043e-07	1946.34	16.7295	35.9051	23.2086	190.337	16.0979	191.219	1.34774	192.609	0.0212227	192.682	2.69073e-05
															3	1854.72	41.1	49.6744	9.33232	0	0	59.0067		84.1843	15.8157	0	0	100	0.0120933	0.160199	0.0705657	0.063547	0.0387211	0.0237261	0.0146154		7.57666e-07	1941.61	16.618	35.8581	22.8031	189.929	15.7764	190.792	1.29911	192.143	0.019913	192.213	2.41748e-05
															3	1855.44	41.2	49.6714	9.23532	0	0	58.9067		84.3221	15.6779	0	0	100	0.0120576	0.159849	0.0702401	0.0632486	0.0385247	0.0235972	0.014531		6.62412e-07	1936.89	16.5069	35.8112	22.4023	189.523	15.4593	190.367	1.25193	191.68	0.0186756	191.747	2.17022e-05
															3	1856.15	41.3	49.6684	9.13832	0	0	58.8067		84.4604	15.5396	0	0	100	0.0120218	0.159497	0.0699133	0.0629491	0.0383276	0.0234679	0.0144463		5.78765e-07	1932.2	16.3961	35.7641	22.006	189.117	15.1465	189.942	1.20615	191.219	0.0175069	191.283	1.94666e-05
															3	1856.87	41.4	49.6654	9.04132	0	0	58.7067		84.5992	15.4008	0	0	100	0.0119859	0.159144	0.0695854	0.0626487	0.0381298	0.023338	0.0143613		5.05356e-07	1927.54	16.2856	35.7171	21.6142	188.712	14.8382	189.519	1.16175	190.76	0.0164037	190.821	1.74467e-05
															3	1857.58	41.5	49.6624	8.94432	0	0	58.6067		84.7384	15.2616	0	0	100	0.0119499	0.158791	0.0692564	0.0623472	0.0379313	0.0232078	0.0142761		4.40974e-07	1922.89	16.1755	35.67	21.227	188.309	14.5341	189.098	1.11869	190.303	0.0153626	190.361	1.56233e-05
															3	1858.3	41.6	49.6594	8.84732	0	0	58.5067		84.8781	15.1219	0	0	100	0.0119137	0.158435	0.0689263	0.0620447	0.0377322	0.0230771	0.0141905		3.84551e-07	1918.27	16.0656	35.6229	20.8442	187.906	14.2344	188.677	1.07695	189.848	0.0143806	189.903	1.39783e-05
															3	1859.01	41.7	49.6564	8.75032	0	0	58.4067		85.0183	14.9817	0	0	100	0.0118775	0.158079	0.0685951	0.0617411	0.0375323	0.022946	0.0141047		3.35107e-07	1913.67	15.9561	35.5757	20.4659	187.505	13.9388	188.258	1.03648	189.395	0.0134548	189.448	1.24957e-05
															3	1859.72	41.8	49.6534	8.65332	0	0	58.3067		85.159	14.841	0	0	100	0.011841	0.157722	0.0682627	0.0614366	0.0373318	0.0228144	0.0140185		2.91824e-07	1909.09	15.8468	35.5285	20.0921	187.104	13.6476	187.841	0.997264	188.944	0.0125824	188.995	1.11605e-05
															3	1860.44	41.9	49.6504	8.55632	0	0	58.2067		85.3001	14.6999	0	0	100	0.0118045	0.157363	0.0679292	0.0611309	0.0371306	0.0226823	0.0139321		2.53962e-07	1904.53	15.7379	35.4813	19.7227	186.705	13.3605	187.424	0.959267	188.496	0.0117605	188.544	9.95895e-06
															3	1861.15	42	49.6474	8.45932	0	0	58.1067		85.4417	14.5583	0	0	100	0.0117679	0.157003	0.0675945	0.0608242	0.0369287	0.0225498	0.0138453		2.20876e-07	1900	15.6293	35.434	19.3576	186.306	13.0775	187.009	0.92246	188.049	0.0109867	188.095	8.87865e-06
															3	1861.87	42.1	49.6444	8.36232	0	0	58.0067		85.5839	14.4161	0	0	100	0.0117311	0.156642	0.0672586	0.0605165	0.0367261	0.0224169	0.0137583		1.91954e-07	1895.49	15.521	35.3867	18.997	185.909	12.7987	186.595	0.886814	187.605	0.0102584	187.648	7.90819e-06
															3	1862.58	42.2	49.6414	8.26532	0	0	57.9067		85.7265	14.2735	0	0	100	0.0116942	0.156279	0.0669217	0.0602077	0.0365228	0.0222834	0.013671		1.66695e-07	1891	15.413	35.3394	18.6407	185.513	12.524	186.183	0.8523	187.162	0.00957331	187.204	7.03715e-06
															3	1863.3	42.3	49.6384	8.16832	0	0	57.8067		85.8696	14.1304	0	0	100	0.0116571	0.155915	0.0665835	0.0598978	0.0363188	0.0221496	0.0135833		1.44654e-07	1886.52	15.3054	35.292	18.2887	185.117	12.2534	185.772	0.81889	186.721	0.00892918	186.761	6.25605e-06
															3	1864.01	42.4	49.6354	8.07132	0	0	57.7067		86.0132	13.9868	0	0	100	0.01162	0.15555	0.0662442	0.0595868	0.0361141	0.0220152	0.0134954		1.25454e-07	1882.08	15.1981	35.2446	17.941	184.723	11.9867	185.362	0.786557	186.283	0.00832383	186.321	5.55623e-06
															3	1864.72	42.5	49.6324	7.97432	0	0	57.6067		86.1573	13.8427	0	0	100	0.0115827	0.155184	0.0659037	0.0592748	0.0359087	0.0218804	0.0134072		1.08726e-07	1877.65	15.091	35.1972	17.5976	184.33	11.7241	184.953	0.755274	185.846	0.00775521	185.882	4.92979e-06
															3	1865.44	42.6	49.6294	7.87732	0	0	57.5067		86.3019	13.6981	0	0	100	0.0115452	0.154817	0.065562	0.0589617	0.0357026	0.0217451	0.0133186		9.41597e-08	1873.24	14.9843	35.1498	17.2585	183.937	11.4654	184.546	0.725013	185.412	0.00722135	185.446	4.36958e-06
															3	1866.15	42.7	49.6264	7.78032	0	0	57.4067		86.447	13.553	0	0	100	0.0115077	0.154448	0.0652191	0.0586475	0.0354957	0.0216094	0.0132298		8.14675e-08	1868.85	14.878	35.1023	16.9236	183.546	11.2107	184.14	0.695749	184.979	0.00672039	185.012	3.86906e-06
															3	1866.87	42.8	49.6234	7.68332	0	0	57.3067		86.5926	13.4074	0	0	100	0.01147	0.154078	0.064875	0.0583322	0.0352882	0.0214732	0.0131406		7.04537e-08	1864.49	14.7719	35.0548	16.5928	183.156	10.9599	183.735	0.667457	184.549	0.00625054	184.579	3.42229e-06
															3	1867.58	42.9	49.6204	7.58632	0	0	57.2067		86.7388	13.2612	0	0	100	0.0114322	0.153706	0.0645297	0.0580158	0.0350799	0.0213365	0.0130511		6.08705e-08	1860.14	14.6661	35.0073	16.2663	182.767	10.7129	183.332	0.640111	184.12	0.0058101	184.149	3.0239e-06
															3	1868.3	43	49.6174	7.48932	0	0	57.1067		86.8854	13.1146	0	0	100	0.0113942	0.153334	0.0641832	0.0576983	0.0348708	0.0211993	0.0129613		5.25617e-08	1855.81	14.5607	34.9597	15.944	182.379	10.4698	182.93	0.613686	183.693	0.00539744	183.721	2.66901e-06
															3	1869.01	43.1	49.6144	7.39232	0	0	57.0067		87.0325	12.9675	0	0	100	0.0113561	0.15296	0.0638355	0.0573796	0.0346611	0.0210616	0.0128712		4.53518e-08	1851.51	14.4556	34.9121	15.6257	181.992	10.2305	182.529	0.588158	183.268	0.00501102	183.295	2.35318e-06
															3	1869.72	43.2	49.6114	7.29532	0	0	56.9067		87.1802	12.8198	0	0	100	0.0113179	0.152584	0.0634866	0.0570599	0.0344506	0.0209235	0.0127808		3.90945e-08	1847.22	14.3508	34.8646	15.3116	181.607	9.99489	182.13	0.563504	182.845	0.00464937	182.87	2.0724e-06
															3	1870.44	43.3	49.6084	7.19832	0	0	56.8067		87.3284	12.6716	0	0	100	0.0112796	0.152208	0.0631364	0.056739	0.0342393	0.0207849	0.01269		3.36571e-08	1842.96	14.2464	34.8169	15.0016	181.222	9.76307	181.732	0.539699	182.424	0.00431109	182.448	1.82304e-06
															3	1871.15	43.4	49.6054	7.10132	0	0	56.7067		87.4771	12.5229	0	0	100	0.0112411	0.15183	0.062785	0.056417	0.0340274	0.0206457	0.012599		2.8986e-08	1838.71	14.1422	34.7693	14.6956	180.838	9.53495	181.335	0.516722	182.005	0.00399485	182.028	1.60184e-06
															3	1871.87	43.5	49.6024	7.00432	0	0	56.6067		87.6263	12.3737	0	0	100	0.0112025	0.15145	0.0624324	0.0560939	0.0338146	0.0205061	0.0125076		2.49278e-08	1834.48	14.0384	34.7216	14.3937	180.455	9.31051	180.94	0.49455	181.588	0.00369938	181.609	1.40581e-06
															3	1872.58	43.6	49.5994	6.90732	0	0	56.5067		87.7761	12.2239	0	0	100	0.0111637	0.15107	0.0620785	0.0557696	0.0336012	0.020366	0.0124159		2.14254e-08	1830.28	13.9349	34.674	14.0958	180.074	9.0897	180.545	0.47316	181.173	0.00342349	181.193	1.23229e-06
															3	1873.3	43.7	49.5964	6.81032	0	0	56.4067		87.9264	12.0736	0	0	100	0.0111248	0.150688	0.0617234	0.0554442	0.0333869	0.0202254	0.0123238		1.84039e-08	1826.09	13.8317	34.6263	13.8019	179.693	8.87251	180.153	0.452531	180.759	0.00316603	180.778	1.07886e-06
															3	1874.01	43.8	49.5934	6.71332	0	0	56.3067		88.0772	11.9228	0	0	100	0.0110858	0.150304	0.061367	0.0551176	0.0331719	0.0200843	0.0122315		1.58037e-08	1821.92	13.7288	34.5786	13.512	179.314	8.65889	179.761	0.432642	180.347	0.0029259	180.365	9.43361e-07
															3	1874.72	43.9	49.5904	6.61632	0	0	56.2067		88.2286	11.7714	0	0	100	0.0110466	0.14992	0.0610093	0.0547898	0.0329561	0.0199427	0.0121388		1.35302e-08	1817.77	13.6263	34.5308	13.226	178.936	8.44882	179.371	0.413473	179.937	0.0027021	179.954	8.23831e-07
															3	1875.44	44	49.5874	6.51932	0	0	56.1067		88.3805	11.6195	0	0	100	0.0110073	0.149533	0.0606504	0.0544609	0.0327396	0.0198006	0.0120458		1.15884e-08	1813.64	13.5241	34.4831	12.9439	178.558	8.24226	178.982	0.395002	179.529	0.00249363	179.545	7.18514e-07
															3	1876.15	44.1	49.5844	6.42232	0	0	56.0067		88.5329	11.4671	0	0	100	0.0109678	0.149146	0.0602902	0.0541308	0.0325223	0.019658	0.0119524		9.91558e-09	1809.52	13.4222	34.4353	12.6657	178.182	8.03918	178.594	0.377211	179.123	0.00229957	179.138	6.25833e-07
															3	1876.87	44.2	49.5814	6.32532	0	0	55.9067		88.6859	11.3141	0	0	100	0.0109282	0.148757	0.0599286	0.0537995	0.0323042	0.0195149	0.0118587		8.48159e-09	1805.43	13.3206	34.3876	12.3914	177.807	7.83956	178.208	0.360079	178.719	0.00211904	178.733	5.44372e-07
															3	1877.58	44.3	49.5784	6.22832	0	0	55.8067		88.8395	11.1605	0	0	100	0.0108885	0.148367	0.0595658	0.0534671	0.0320854	0.0193712	0.0117647		7.23869e-09	1801.35	13.2194	34.3398	12.121	177.433	7.64335	177.823	0.343587	178.316	0.00195121	178.33	4.72867e-07
															3	1878.3	44.4	49.5754	6.13132	0	0	55.7067		88.9936	11.0064	0	0	100	0.0108486	0.147975	0.0592017	0.0531334	0.0318657	0.0192271	0.0116703		6.17261e-09	1797.3	13.1185	34.292	11.8544	177.06	7.45052	177.439	0.327717	177.915	0.00179529	177.928	4.10179e-07
															3	1879.01	44.5	49.5724	6.03432	0	0	55.6067		89.1482	10.8518	0	0	100	0.0108086	0.147582	0.0588363	0.0527985	0.0316453	0.0190824	0.0115756		5.2861e-09	1793.26	13.0179	34.2442	11.5915	176.688	7.26105	177.057	0.312451	177.516	0.00165053	177.528	3.55295e-07
															3	1879.72	44.6	49.5694	5.93732	0	0	55.5067		89.3034	10.6966	0	0	100	0.0107684	0.147188	0.0584696	0.0524625	0.031424	0.0189372	0.0114806		4.51229e-09	1789.24	12.9176	34.1964	11.3325	176.318	7.07491	176.676	0.29777	177.119	0.00151624	177.13	3.07304e-07
															3	1880.44	44.7	49.5664	5.84032	0	0	55.4067		89.4592	10.5408	0	0	100	0.0107281	0.146792	0.0581015	0.0521252	0.031202	0.0187915	0.0113852		3.83543e-09	1785.23	12.8177	34.1485	11.0772	175.948	6.89205	176.296	0.283657	176.723	0.00139174	176.734	2.654e-07
															3	1881.15	44.8	49.5634	5.74332	0	0	55.3067		89.6155	10.3845	0	0	100	0.0106876	0.146394	0.0577321	0.0517867	0.0309791	0.0186453	0.0112895		3.27468e-09	1781.25	12.718	34.1007	10.8256	175.579	6.71246	175.917	0.270094	176.329	0.00127641	176.339	2.28861e-07
															3	1881.87	44.9	49.5604	5.64632	0	0	55.2067		89.7724	10.2276	0	0	100	0.010647	0.145996	0.0573614	0.051447	0.0307555	0.0184985	0.0111934		2.76107e-09	1777.28	12.6188	34.0529	10.5778	175.212	6.53609	175.54	0.257066	175.937	0.00116964	175.947	1.9705e-07
															3	1882.58	45	49.5574	5.54932	0	0	55.1067		89.9299	10.0701	0	0	100	0.0106063	0.145595	0.0569893	0.051106	0.030531	0.0183512	0.011097		2.34875e-09	1773.33	12.5198	34.005	10.3336	174.846	6.36292	175.164	0.244555	175.547	0.00107089	175.556	1.69389e-07
															3	1883.3	45.1	49.5544	5.45232	0	0	55.0067		90.0879	9.9121	0	0	100	0.0105654	0.145194	0.0566159	0.0507638	0.0303058	0.0182034	0.0110002		1.98567e-09	1769.4	12.4212	33.9571	10.093	174.48	6.19291	174.789	0.232545	175.158	0.000979604	175.166	1.45379e-07
															3	1884.01	45.2	49.5514	5.35532	0	0	54.9067		90.2465	9.75349	0	0	100	0.0105243	0.144791	0.0562411	0.0504204	0.0300797	0.018055	0.0109031		1.67264e-09	1765.49	12.3229	33.9093	9.85613	174.116	6.02604	174.416	0.221022	174.771	0.000895299	174.779	1.24565e-07
															3	1884.72	45.3	49.5484	5.25832	0	0	54.8067		90.4057	9.5943	0	0	100	0.0104831	0.144386	0.0558649	0.0500757	0.0298528	0.0179061	0.0108056		1.42854e-09	1761.59	12.2249	33.8614	9.62284	173.753	5.86227	174.044	0.209968	174.386	0.000817501	174.393	1.06549e-07
															3	1885.44	45.4	49.5454	5.16132	0	0	54.7067		90.5655	9.43453	0	0	100	0.0104418	0.14398	0.0554874	0.0497297	0.029625	0.0177566	0.0107078		1.21815e-09	1757.71	12.1272	33.8135	9.39312	173.391	5.70157	173.673	0.19937	174.002	0.000745766	174.009	9.09849e-08
															3	1886.15	45.5	49.5424	5.06432	0	0	54.6067		90.7258	9.27418	0	0	100	0.0104003	0.143572	0.0551085	0.0493825	0.0293964	0.0176066	0.0106096		1.02373e-09	1753.85	12.0299	33.7657	9.16696	173.03	5.54391	173.304	0.189213	173.62	0.000679678	173.626	7.75568e-08
															3	1886.87	45.6	49.5394	4.96732	0	0	54.5067		90.8868	9.11323	0	0	100	0.0103586	0.143163	0.0547282	0.049034	0.029167	0.017456	0.010511		8.63937e-10	1750	11.9329	33.7178	8.94433	172.67	5.38926	172.935	0.179482	173.24	0.000618844	173.246	6.59895e-08
															3	1887.58	45.7	49.5364	4.87032	0	0	54.4067		91.0483	8.95169	0	0	100	0.0103168	0.142753	0.0543465	0.0486842	0.0289367	0.0173049	0.0104121		7.39339e-10	1746.17	11.8362	33.6699	8.72521	172.311	5.23759	172.569	0.170163	172.861	0.000562894	172.867	5.60437e-08
															3	1888.3	45.8	49.5334	4.77332	0	0	54.3067		91.2104	8.78956	0	0	100	0.0102748	0.142341	0.0539634	0.0483332	0.0287056	0.0171532	0.0103128		6.13352e-10	1742.36	11.7399	33.622	8.50957	171.954	5.08886	172.203	0.161243	172.484	0.000511483	172.489	4.75096e-08
															3	1889.01	45.9	49.5304	4.67632	0	0	54.2067		91.3732	8.62683	0	0	100	0.0102327	0.141927	0.0535789	0.0479808	0.0284737	0.017001	0.0102132		5.23334e-10	1738.56	11.6439	33.5741	8.29738	171.597	4.94305	171.838	0.152709	172.108	0.000464286	172.113	4.01963e-08
															3	1889.72	46	49.5274	4.57932	0	0	54.1067		91.5365	8.4635	0	0	100	0.0101905	0.141512	0.0531929	0.0476271	0.0282408	0.0168482	0.0101131		4.32303e-10	1734.78	11.5482	33.5263	8.08863	171.242	4.80012	171.475	0.144547	171.734	0.000420997	171.739	3.394e-08
															3	1890.44	46.1	49.5244	4.48232	0	0	54.0067		91.7004	8.29957	0	0	100	0.010148	0.141095	0.0528055	0.0472721	0.0280071	0.0166948	0.0100127		3.59143e-10	1731.02	11.4529	33.4784	7.88329	170.887	4.66005	171.113	0.136744	171.362	0.000381331	171.367	2.86012e-08
															3	1891.15	46.2	49.5214	4.38532	0	0	53.9067		91.865	8.13502	0	0	100	0.0101054	0.140677	0.0524167	0.0469159	0.0277726	0.0165409	0.00991199		3.23169e-10	1727.27	11.3579	33.4305	7.68132	170.534	4.5228	170.753	0.129288	170.992	0.00034502	170.996	2.40482e-08
															3	1891.87	46.3	49.5184	4.28832	0	0	53.8067		92.0301	7.96987	0	0	100	0.0100627	0.140257	0.0520265	0.0465582	0.0275372	0.0163864	0.00981085		2.67664e-10	1723.54	11.2632	33.3826	7.48272	170.182	4.38833	170.394	0.122168	170.623	0.000311813	170.626	2.01805e-08
															3	1892.58	46.4	49.5154	4.19132	0	0	53.7067		92.1959	7.80409	0	0	100	0.0100198	0.139836	0.0516348	0.0461993	0.0273009	0.0162313	0.00970934		2.30748e-10	1719.83	11.1689	33.3347	7.28745	169.831	4.25663	170.036	0.115371	170.255	0.000281475	170.259	1.68976e-08
															3	1893.3	46.5	49.5124	4.09432	0	0	53.6067		92.3623	7.63771	0	0	100	0.00997673	0.139413	0.0512416	0.045839	0.0270637	0.0160757	0.00960745		1.74064e-10	1716.13	11.0749	33.2869	7.09548	169.481	4.12766	169.679	0.108886	169.889	0.000253788	169.892	1.41197e-08
															3	1894.01	46.6	49.5094	3.99732	0	0	53.5067		92.5293	7.47069	0	0	100	0.00993351	0.138988	0.050847	0.0454774	0.0268256	0.0159194	0.00950518		1.55626e-10	1712.45	10.9812	33.239	6.9068	169.132	4.00139	169.323	0.102701	169.525	0.000228547	169.528	1.17682e-08
															3	1894.72	46.7	49.5064	3.90032	0	0	53.4067		92.6969	7.30306	0	0	100	0.00989012	0.138562	0.0504508	0.0451144	0.0265866	0.0157626	0.00940252		1.17404e-10	1708.78	10.8878	33.1911	6.72137	168.784	3.87779	168.969	0.0968066	169.162	0.00020556	169.165	9.78642e-09
															3	1895.44	46.8	49.5034	3.80332	0	0	53.3067		92.8652	7.13479	0	0	100	0.00984657	0.138135	0.0500532	0.04475	0.0263468	0.0156052	0.00929948		9.84135e-11	1705.13	10.7948	33.1433	6.53918	168.438	3.75682	168.616	0.0911909	168.801	0.000184651	168.803	8.11765e-09
															3	1896.15	46.9	49.5004	3.70632	0	0	53.2067		93.0341	6.96589	0	0	100	0.00980286	0.137705	0.0496541	0.0443843	0.026106	0.0154472	0.00919605		7.9198e-11	1701.49	10.7022	33.0954	6.36019	168.092	3.63846	168.264	0.0858439	168.441	0.000165652	168.443	6.71549e-09
															3	1896.87	47	49.4974	3.60932	0	0	53.1067		93.2036	6.79636	0	0	100	0.00975898	0.137274	0.0492535	0.0440172	0.0258644	0.0152886	0.00909224		5.9753e-11	1697.87	10.6098	33.0476	6.18438	167.747	3.52268	167.914	0.0807556	168.083	0.00014841	168.085	5.54723e-09
															3	1897.58	47.1	49.4944	3.51232	0	0	53.0067		93.3738	6.62618	0	0	100	0.00971494	0.136842	0.0488514	0.0436487	0.0256218	0.0151294	0.00898803		6.01118e-11	1694.27	10.5178	32.9998	6.01173	167.404	3.40945	167.564	0.0759162	167.726	0.00013278	167.728	4.56777e-09
															3	1898.3	47.2	49.4914	3.41532	0	0	52.9067		93.5446	6.45537	0	0	100	0.00967073	0.136408	0.0484478	0.0432789	0.0253783	0.0149696	0.00888343		6.04749e-11	1690.68	10.4262	32.9519	5.84221	167.062	3.29873	167.216	0.0713161	167.371	0.00011863	167.373	3.75156e-09
															3	1899.01	47.3	49.4884	3.31832	0	0	52.8067		93.7161	6.2839	0	0	100	0.00962635	0.135972	0.0480426	0.0429076	0.0251339	0.0148092	0.00877843		6.08425e-11	1687.1	10.3348	32.9041	5.67579	166.721	3.19049	166.87	0.0669461	167.017	0.000105835	167.019	3.07448e-09
															3	1899.72	47.4	49.4854	3.22132	0	0	52.7067		93.8882	6.11179	0	0	100	0.00958181	0.135534	0.0476359	0.0425349	0.0248885	0.0146482	0.00867303		6.12145e-11	1683.54	10.2439	32.8563	5.51245	166.381	3.08471	166.524	0.0627972	166.665	9.42812e-05	166.667	2.51119e-09
															3	1900.44	47.5	49.4824	3.12432	0	0	52.6067		94.061	5.93902	0	0	100	0.00953709	0.135095	0.0472277	0.0421608	0.0246423	0.0144865	0.00856723		6.15911e-11	1680	10.1532	32.8085	5.35217	166.042	2.98135	166.18	0.0588605	166.314	8.38613e-05	166.316	2.0435e-09
															3	1901.15	47.6	49.4794	3.02732	0	0	52.5067		94.2344	5.76559	0	0	100	0.00949221	0.134654	0.0468179	0.0417853	0.024395	0.0143243	0.00846103		6.19724e-11	1676.47	10.0629	32.7607	5.19491	165.704	2.88039	165.837	0.0551276	165.965	7.44771e-05	165.966	1.65802e-09
															3	1901.87	47.7	49.4764	2.93032	0	0	52.4067		94.4085	5.5915	0	0	100	0.00944715	0.134212	0.0464065	0.0414083	0.0241469	0.0141614	0.00835443		6.23584e-11	1672.96	9.97292	32.713	5.04066	165.367	2.78179	165.495	0.0515902	165.617	6.60374e-05	165.618	1.34061e-09
															3	1902.58	47.8	49.4734	2.83332	0	0	52.3067		94.5833	5.41675	0	0	100	0.00940192	0.133768	0.0459936	0.0410299	0.0238978	0.013998	0.00824741		6.27493e-11	1669.46	9.88329	32.6652	4.88938	165.031	2.68553	165.154	0.0482402	165.271	5.8458e-05	165.272	1.08226e-09
															3	1903.3	47.9	49.4704	2.73632	0	0	52.2067		94.7587	5.24132	0	0	100	0.00935652	0.133322	0.0455791	0.0406501	0.0236477	0.0138339	0.00813999		6.31451e-11	1665.97	9.794	32.6175	4.74105	164.696	2.59157	164.815	0.04507	164.926	5.16614e-05	164.927	8.67529e-10
															3	1904.01	48	49.4674	2.63932	0	0	52.1067		94.9348	5.06523	0	0	100	0.00931094	0.132874	0.045163	0.0402688	0.0233967	0.0136691	0.00803215		6.35459e-11	1662.5	9.70504	32.5697	4.59565	164.363	2.49989	164.477	0.0420718	164.582	4.55758e-05	164.583	6.95193e-10
															3	1904.72	48.1	49.4644	2.54232	0	0	52.0067		95.1115	4.88845	0	0	100	0.00926519	0.132425	0.0447453	0.039886	0.0231447	0.0135037	0.0079239		6.39519e-11	1659.04	9.61643	32.522	4.45315	164.03	2.41045	164.14	0.0392385	164.24	4.01355e-05	164.241	5.57852e-10
															3	1905.44	48.2	49.4614	2.44532	0	0	51.9067		95.289	4.71099	0	0	100	0.00921926	0.131974	0.0443259	0.0395017	0.0228917	0.0133377	0.00781523		6.4363e-11	1655.6	9.52816	32.4743	4.31352	163.699	2.32322	163.804	0.0365629	163.9	3.52797e-05	163.9	4.4457e-10
															3	1906.15	48.3	49.4584	2.34832	0	0	51.8067		95.4671	4.53285	0	0	100	0.00917316	0.131521	0.043905	0.039116	0.0226378	0.0131711	0.00770615		6.47795e-11	1652.17	9.44024	32.4266	4.17673	163.369	2.23817	163.47	0.034038	163.56	3.09529e-05	163.561	3.50084e-10
															3	1906.87	48.4	49.4554	2.25132	0	0	51.7067		95.646	4.35402	0	0	100	0.00912688	0.131067	0.0434824	0.0387288	0.0223829	0.0130038	0.00759664		6.52014e-11	1648.76	9.35265	32.3789	4.04277	163.04	2.15529	163.136	0.0316573	163.222	2.7104e-05	163.223	2.78422e-10
															3	1907.58	48.5	49.4524	2.15432	0	0	51.6067		95.8255	4.1745	0	0	100	0.00908041	0.13061	0.0430582	0.0383401	0.022127	0.0128358	0.0074867		6.56289e-11	1645.36	9.26541	32.3313	3.9116	162.711	2.07452	162.804	0.0294143	162.886	2.36862e-05	162.887	2.17615e-10
															3	1908.3	48.6	49.4494	2.05732	0	0	51.5067		96.0057	3.99428	0	0	100	0.00903377	0.130152	0.0426324	0.0379498	0.0218701	0.0126672	0.00737634		6.60619e-11	1641.98	9.17851	32.2836	3.7832	162.384	1.99585	162.473	0.0273027	162.551	2.06566e-05	162.551	1.71453e-10
															3	1909.01	48.7	49.4464	1.96032	0	0	51.4067		96.1866	3.81336	0	0	100	0.00898694	0.129692	0.0422049	0.0375581	0.0216122	0.012498	0.00726555		6.65008e-11	1638.6	9.09195	32.236	3.65754	162.059	1.91925	162.144	0.0253164	162.217	1.79762e-05	162.218	1.33914e-10
															3	1909.72	48.8	49.4434	1.86332	0	0	51.3067		96.3683	3.63173	0	0	100	0.00893994	0.129231	0.0417757	0.0371648	0.0213533	0.0123281	0.00715433		6.69455e-11	1635.25	9.00574	32.1884	3.5346	161.734	1.84468	161.815	0.0234497	161.885	1.56093e-05	161.885	1.02004e-10
															3	1910.44	48.9	49.4404	1.76632	0	0	51.2067		96.5506	3.4494	0	0	100	0.00889275	0.128767	0.0413449	0.03677	0.0210934	0.0121575	0.00704268		6.73962e-11	1631.9	8.91988	32.1408	3.41435	161.41	1.77212	161.488	0.0216969	161.554	1.35233e-05	161.554	7.94434e-11
															3	1911.15	49	49.4374	1.66932	0	0	51.1067		96.7337	3.26635	0	0	100	0.00884537	0.128302	0.0409123	0.0363736	0.0208324	0.0119863	0.00693058		6.7853e-11	1628.57	8.83436	32.0933	3.29676	161.087	1.70154	161.162	0.0200525	161.224	1.16887e-05	161.224	5.96654e-11
															3	1911.87	49.1	49.4344	1.57232	0	0	51.0067		96.9174	3.08258	0	0	100	0.00879781	0.127835	0.0404781	0.0359757	0.0205705	0.0118144	0.00681805		6.8316e-11	1625.25	8.74918	32.0457	3.1818	160.766	1.6329	160.837	0.0185113	160.896	1.00785e-05	160.896	4.63739e-11
															3	1912.58	49.2	49.4314	1.47532	0	0	50.9067		97.1019	2.89809	0	0	100	0.00875006	0.127366	0.0400421	0.0355762	0.0203075	0.0116418	0.00670508		6.87854e-11	1621.95	8.66436	31.9982	3.06946	160.445	1.56619	160.513	0.0170681	160.569	8.66842e-06	160.569	3.62663e-11
															3	1913.3	49.3	49.4284	1.37832	0	0	50.8067		97.2871	2.71287	0	0	100	0.00870213	0.126895	0.0396045	0.0351752	0.0200435	0.0114685	0.00659166		6.92613e-11	1618.66	8.57988	31.9507	2.9597	160.126	1.50136	160.191	0.0157181	160.243	7.43636e-06	160.243	2.58164e-11
															3	1914.01	49.4	49.4254	1.28132	0	0	50.7067		97.4731	2.52693	0	0	100	0.008654	0.126423	0.0391651	0.0347725	0.0197784	0.0112945	0.00647779		6.97438e-11	1615.38	8.49575	31.9032	2.85249	159.807	1.43839	159.869	0.0144566	159.919	6.36235e-06	159.919	1.87579e-11
															3	1914.72	49.5	49.4224	1.18432	0	0	50.6067		97.6598	2.34025	0	0	100	0.00860569	0.125948	0.038724	0.0343683	0.0195123	0.0111199	0.00636347		7.02331e-11	1612.12	8.41196	31.8558	2.74781	159.49	1.37725	159.549	0.0132789	159.596	5.42837e-06	159.596	1.52694e-11
															3	1915.44	49.6	49.4194	1.08732	0	0	50.5067		97.8472	2.15283	0	0	100	0.00855718	0.125472	0.0382811	0.0339625	0.0192452	0.0109446	0.0062487		7.07293e-11	1608.87	8.32853	31.8083	2.64564	159.174	1.31792	159.23	0.0121807	159.274	4.6182e-06	159.274	1.16564e-11
															3	1916.15	49.7	49.4164	0.990321	0	0	50.4067		98.0353	1.96466	0	0	100	0.00850848	0.124994	0.0378365	0.033555	0.0189769	0.0107685	0.00613348		7.12326e-11	1605.63	8.24544	31.7609	2.54594	158.859	1.26035	158.912	0.0111578	158.954	3.91725e-06	158.954	7.9121e-12
															3	1916.87	49.8	49.4134	0.893321	0	0	50.3067		98.2242	1.77575	0	0	100	0.00845959	0.124513	0.0373901	0.033146	0.0187077	0.0105918	0.0060178		7.17431e-11	1602.41	8.16271	31.7135	2.44869	158.545	1.20454	158.595	0.0102061	158.634	3.31242e-06	158.635	4.02925e-12
															3	1917.58	49.9	49.4104	0.796321	0	0	50.2067		98.4139	1.58609	0	0	100	0.0084105	0.124031	0.036942	0.0327353	0.0184373	0.0104144	0.00590165		7.22609e-11	1599.2	8.08032	31.6662	2.35386	158.232	1.15043	158.28	0.00932167	158.316	2.792e-06	158.317	4.10521e-12
															3	1918.3	50	49.4074	0.699321	0	0	50.1067		98.6043	1.39566	0	0	100	0.00836122	0.123547	0.036492	0.032323	0.0181659	0.0102363	0.00578504		7.27863e-11	1596	7.99829	31.6188	2.26143	157.92	1.09801	157.966	0.00850083	158	2.3455e-06	158	4.18408e-12
[truncated: 23 more columns]

## Sheet: B-2 (Spinel Peridotite)
Sample No.	T	P	Ti	V			Stop Row	Ti	F	Row	V	fO2					Mineral assemblage for spinel-lherzolite was chosen from Workman and Hart (2005).	Water-bearing melting reaction for spinel-lherzolite and harzburgite were chosen from Gaetani and Grove (1998).																Wo# Opx	AlT Cpx	AlT Opx	Cr# Sp	Mineral compositions were chosen from Workman and Hart (2005).
							300											T(℃)	P(Gpa)							Ol	Opx	Cpx	Sp					4.37517	0.171924	0.147949	10.654
																		1302.44	1.06176					DTi		0.008	0.118772	0.342976	0.3			The chemcial compositions of depleted mantle (DM) are from Salters and Stracke (2004)
																		Ol (%)	Opx	Cpx	Sp			DSc		0.12	0.809533	1.92907	0.06		Co (ppm)
																	Mineral assemblage for spinel-lherzolite	57	28	13	2			DV: FMQ	1.352	0.0177378	0.365867	0.374122	1.26971		V	Ti	Sc
																	Melting reaction for harzburgite	-0.193182	-0.806818					DV: FMQ	-1	0.0717325	1.02377	1.56294	3.51464		79	798	16.3
																								DV: FMQ	0	0.0396019	0.661002	0.851024	2.27972
																	Melting reaction for spinel-lherzolite	0.25	-0.51	-0.62	-0.12			DV: FMQ	1	0.0218633	0.426779	0.463385	1.4787
																								DV: FMQ	2	0.0120702	0.275552	0.252314	0.959138
															P(Gpa)	T (℃)	F	Ol	Opx	Cpx	Sp	Sum		Ol corrected	Opx corrected	Cpx corrected	Sp corrected	Sum	DTi	DSc	DV: FMQ-2	DV: FMQ-1	DV: FMQ	DV: FMQ+1	DV: FMQ+2		Ti frac	Ti aggre	Sc frac	Sc aggre	V FMQ-2 frac	V FMQ-2 aggre	V FMQ-1 frac	V FMQ-1 aggre	V FMQ frac	V FMQ aggre	V FMQ+1 frac	V FMQ+1 aggre	V FMQ+2 frac
															1.5	1302.88	0.1	57.025	27.949	12.938	1.988	99.9		57.0821	27.977	12.951	1.98999	100	0.0881839	0.546008	0.186203	0.599723	0.363116	0.221319	0.135745		8956.66	8956.66	29.8282	29.8282	422.422	422.422	131.64	131.64	217.18	217.18	355.7	355.7	578.292
															1.5	1303.31	0.2	57.05	27.898	12.876	1.976	99.8		57.1643	27.9539	12.9018	1.97996	100	0.0879644	0.544966	0.185822	0.598425	0.362349	0.220862	0.135471		8886.87	8921.76	29.8603	29.8443	421.441	421.931	131.837	131.738	217.258	217.219	355.182	355.441	575.787
															1.5	1303.75	0.3	57.075	27.847	12.814	1.964	99.7		57.2467	27.9308	12.8526	1.96991	100	0.0877445	0.543922	0.18544	0.597125	0.361581	0.220405	0.135197		8817.37	8886.97	29.8926	29.8604	420.46	421.441	132.035	131.837	217.335	217.258	354.664	355.182	573.285
															1.5	1304.18	0.4	57.1	27.796	12.752	1.952	99.6		57.3293	27.9076	12.8032	1.95984	100	0.0875242	0.542875	0.185058	0.595822	0.360811	0.219946	0.134922		8748.19	8852.27	29.9249	29.8765	419.478	420.95	132.233	131.936	217.413	217.297	354.144	354.922	570.786
															1.5	1304.62	0.5	57.125	27.745	12.69	1.94	99.5		57.4121	27.8844	12.7538	1.94975	100	0.0873034	0.541827	0.184674	0.594516	0.360039	0.219487	0.134646		8679.3	8817.68	29.9574	29.8927	418.496	420.46	132.433	132.036	217.491	217.336	353.624	354.663	568.291
															1.5	1305.05	0.6	57.15	27.694	12.628	1.928	99.4		57.495	27.8612	12.7042	1.93964	100	0.0870821	0.540776	0.18429	0.593208	0.359266	0.219027	0.13437		8610.71	8783.18	29.9901	29.9089	417.513	419.968	132.634	132.135	217.57	217.375	353.103	354.403	565.798
															1.5	1305.49	0.7	57.175	27.643	12.566	1.916	99.3		57.578	27.8379	12.6546	1.92951	100	0.0868604	0.539724	0.183905	0.591897	0.358492	0.218566	0.134093		8542.43	8748.79	30.0228	29.9252	416.529	419.477	132.836	132.235	217.648	217.414	352.581	354.142	563.31
															1.5	1305.92	0.8	57.2	27.592	12.504	1.904	99.2		57.6613	27.8145	12.6048	1.91935	100	0.0866383	0.538669	0.18352	0.590583	0.357716	0.218104	0.133816		8474.45	8714.5	30.0557	29.9415	415.544	418.985	133.038	132.336	217.727	217.453	352.058	353.882	560.824
															1.5	1306.36	0.9	57.225	27.541	12.442	1.892	99.1		57.7447	27.7911	12.555	1.90918	100	0.0864157	0.537612	0.183133	0.589267	0.356938	0.217641	0.133539		8406.77	8680.31	30.0887	29.9579	414.559	418.494	133.242	132.436	217.806	217.492	351.534	353.621	558.342
															1.5	1306.79	1	57.25	27.49	12.38	1.88	99		57.8283	27.7677	12.5051	1.89899	100	0.0861927	0.536553	0.182746	0.587948	0.356159	0.217177	0.13326		8339.39	8646.21	30.1219	29.9743	413.573	418.002	133.447	132.537	217.886	217.532	351.01	353.36	555.863
															1.5	1307.23	1.1	57.275	27.439	12.318	1.868	98.9		57.912	27.7442	12.455	1.88878	100	0.0859692	0.535492	0.182358	0.586627	0.355378	0.216712	0.132981		8272.31	8612.22	30.1552	29.9907	412.586	417.509	133.652	132.639	217.966	217.571	350.485	353.099	553.388
															1.5	1307.66	1.2	57.3	27.388	12.256	1.856	98.8		57.996	27.7206	12.4049	1.87854	100	0.0857453	0.534428	0.181969	0.585302	0.354595	0.216246	0.132702		8205.53	8578.33	30.1886	30.0072	411.598	417.017	133.859	132.74	218.046	217.611	349.958	352.837	550.916
															1.5	1308.1	1.3	57.325	27.337	12.194	1.844	98.7		58.08	27.6971	12.3546	1.86829	100	0.0855209	0.533363	0.18158	0.583975	0.353811	0.215779	0.132422		8139.06	8544.54	30.2222	30.0238	410.61	416.524	134.066	132.842	218.126	217.65	349.431	352.575	548.448
															1.5	1308.53	1.4	57.35	27.286	12.132	1.832	98.6		58.1643	27.6734	12.3043	1.85801	100	0.085296	0.532295	0.181189	0.582646	0.353026	0.215312	0.132141		8072.88	8510.85	30.2559	30.0403	409.621	416.031	134.275	132.945	218.207	217.69	348.903	352.313	545.982
															1.5	1308.97	1.5	57.375	27.235	12.07	1.82	98.5		58.2487	27.6497	12.2538	1.84772	100	0.0850707	0.531225	0.180798	0.581313	0.352239	0.214843	0.13186		8007	8477.26	30.2898	30.057	408.631	415.538	134.485	133.047	218.288	217.73	348.374	352.05	543.521
															1.5	1309.4	1.6	57.4	27.184	12.008	1.808	98.4		58.3333	27.626	12.2033	1.8374	100	0.084845	0.530153	0.180406	0.579978	0.35145	0.214373	0.131579		7941.42	8443.77	30.3238	30.0736	407.641	415.044	134.695	133.15	218.369	217.77	347.845	351.787	541.062
															1.5	1309.84	1.7	57.425	27.133	11.946	1.796	98.3		58.4181	27.6022	12.1526	1.82706	100	0.0846187	0.529079	0.180014	0.578641	0.350659	0.213903	0.131296		7876.14	8410.38	30.3579	30.0904	406.65	414.55	134.907	133.254	218.451	217.81	347.314	351.524	538.607
															1.5	1310.27	1.8	57.45	27.082	11.884	1.784	98.2		58.5031	27.5784	12.1018	1.8167	100	0.0843921	0.528003	0.17962	0.5773	0.349867	0.213431	0.131014		7811.16	8377.09	30.3922	30.1071	405.658	414.056	135.12	133.357	218.532	217.85	346.782	351.261	536.156
															1.5	1310.7	1.9	57.475	27.031	11.822	1.772	98.1		58.5882	27.5545	12.051	1.80632	100	0.0841649	0.526924	0.179226	0.575957	0.349074	0.212959	0.13073		7746.47	8343.9	30.4266	30.124	404.665	413.562	135.333	133.461	218.614	217.89	346.25	350.997	533.707
															1.5	1311.14	2	57.5	26.98	11.76	1.76	98		58.6735	27.5306	12	1.79592	100	0.0839373	0.525843	0.17883	0.574611	0.348279	0.212485	0.130446		7682.09	8310.81	30.4612	30.1408	403.671	413.067	135.548	133.566	218.697	217.931	345.717	350.733	531.263
															1.5	1311.57	2.1	57.525	26.929	11.698	1.748	97.9		58.7589	27.5066	11.9489	1.7855	100	0.0837092	0.524761	0.178434	0.573262	0.347482	0.212011	0.130162		7618	8277.82	30.4959	30.1577	402.677	412.573	135.764	133.67	218.78	217.971	345.182	350.469	528.821
															1.5	1312.01	2.2	57.55	26.878	11.636	1.736	97.8		58.8446	27.4826	11.8978	1.77505	100	0.0834807	0.523675	0.178038	0.571911	0.346683	0.211536	0.129876		7554.21	8244.93	30.5308	30.1747	401.682	412.078	135.981	133.775	218.863	218.012	344.647	350.204	526.384
															1.5	1312.44	2.3	57.575	26.827	11.574	1.724	97.7		58.9304	27.4585	11.8465	1.76459	100	0.0832517	0.522588	0.17764	0.570557	0.345883	0.211059	0.129591		7490.72	8212.14	30.5658	30.1917	400.686	411.582	136.199	133.881	218.946	218.052	344.111	349.939	523.949
															1.5	1312.88	2.4	57.6	26.776	11.512	1.712	97.6		59.0164	27.4344	11.7951	1.7541	100	0.0830222	0.521498	0.177242	0.5692	0.345081	0.210582	0.129304		7427.52	8179.44	30.6009	30.2087	399.69	411.087	136.418	133.987	219.03	218.093	343.574	349.674	521.518
															1.5	1313.31	2.5	57.625	26.725	11.45	1.7	97.5		59.1026	27.4103	11.7436	1.74359	100	0.0827923	0.520406	0.176843	0.56784	0.344278	0.210104	0.129017		7364.63	8146.85	30.6362	30.2258	398.692	410.591	136.639	134.093	219.114	218.134	343.036	349.408	519.091
															1.5	1313.75	2.6	57.65	26.674	11.388	1.688	97.4		59.1889	27.386	11.692	1.73306	100	0.0825619	0.519312	0.176442	0.566478	0.343473	0.209624	0.12873		7302.03	8114.36	30.6717	30.243	397.694	410.095	136.86	134.199	219.198	218.175	342.497	349.143	516.667
															1.5	1314.18	2.7	57.675	26.623	11.326	1.676	97.3		59.2754	27.3618	11.6403	1.72251	100	0.082331	0.518216	0.176042	0.565112	0.342666	0.209144	0.128442		7239.72	8081.96	30.7073	30.2602	396.695	409.599	137.082	134.306	219.283	218.216	341.958	348.876	514.246
															1.5	1314.62	2.8	57.7	26.572	11.264	1.664	97.2		59.3621	27.3374	11.5885	1.71193	100	0.0820996	0.517117	0.17564	0.563744	0.341858	0.208663	0.128153		7177.71	8049.67	30.7431	30.2774	395.696	409.102	137.306	134.413	219.368	218.257	341.417	348.61	511.829
															1.5	1315.05	2.9	57.725	26.521	11.202	1.652	97.1		59.449	27.3131	11.5366	1.70134	100	0.0818678	0.516016	0.175237	0.562373	0.341048	0.20818	0.127864		7116	8017.47	30.779	30.2947	394.695	408.605	137.531	134.521	219.453	218.298	340.875	348.343	509.415
															1.5	1315.49	3	57.75	26.47	11.14	1.64	97		59.5361	27.2887	11.4845	1.69072	100	0.0816354	0.514913	0.174834	0.560999	0.340236	0.207697	0.127574		7054.58	7985.38	30.8151	30.3121	393.694	408.108	137.757	134.628	219.538	218.339	340.333	348.076	507.005
															1.5	1315.92	3.1	57.775	26.419	11.078	1.628	96.9		59.6233	27.2642	11.4324	1.68008	100	0.0814026	0.513808	0.17443	0.559623	0.339423	0.207213	0.127284		6993.46	7953.38	30.8513	30.3295	392.692	407.611	137.984	134.737	219.624	218.381	339.789	347.809	504.599
															1.5	1316.36	3.2	57.8	26.368	11.016	1.616	96.8		59.7107	27.2397	11.3802	1.66942	100	0.0811694	0.5127	0.174025	0.558243	0.338607	0.206728	0.126992		6932.63	7921.48	30.8877	30.3469	391.689	407.113	138.212	134.845	219.711	218.422	339.244	347.541	502.196
															1.5	1316.79	3.3	57.825	26.317	10.954	1.604	96.7		59.7983	27.2151	11.3278	1.65874	100	0.0809356	0.51159	0.173619	0.556861	0.337791	0.206241	0.126701		6872.1	7889.68	30.9242	30.3644	390.685	406.616	138.441	134.954	219.797	218.464	338.699	347.273	499.796
															1.5	1317.23	3.4	57.85	26.266	10.892	1.592	96.6		59.8861	27.1905	11.2754	1.64803	100	0.0807013	0.510478	0.173212	0.555476	0.336972	0.205754	0.126408		6811.86	7857.98	30.961	30.3819	389.681	406.118	138.672	135.064	219.884	218.506	338.152	347.005	497.4
															1.5	1317.66	3.5	57.875	26.215	10.83	1.58	96.5		59.9741	27.1658	11.2228	1.63731	100	0.0804666	0.509363	0.172805	0.554087	0.336152	0.205266	0.126116		6751.91	7826.38	30.9978	30.3995	388.676	405.619	138.904	135.173	219.971	218.548	337.605	346.737	495.007
															1.5	1318.1	3.6	57.9	26.164	10.768	1.568	96.4		60.0622	27.1411	11.1701	1.62656	100	0.0802314	0.508246	0.172396	0.552697	0.33533	0.204777	0.125822		6692.26	7794.88	31.0349	30.4172	387.67	405.121	139.137	135.283	220.059	218.59	337.057	346.468	492.618
															1.5	1318.53	3.7	57.925	26.113	10.706	1.556	96.3		60.1506	27.1163	11.1173	1.61578	100	0.0799957	0.507127	0.171987	0.551303	0.334507	0.204286	0.125528		6632.9	7763.47	31.0721	30.4349	386.663	404.622	139.371	135.394	220.147	218.632	336.507	346.198	490.233
															1.5	1318.97	3.8	57.95	26.062	10.644	1.544	96.2		60.2391	27.0915	11.0644	1.60499	100	0.0797595	0.506005	0.171577	0.549906	0.333681	0.203795	0.125233		6573.84	7732.16	31.1095	30.4526	385.655	404.123	139.606	135.505	220.235	218.674	335.957	345.929	487.851
															1.5	1319.4	3.9	57.975	26.011	10.582	1.532	96.1		60.3278	27.0666	11.0114	1.59417	100	0.0795228	0.504881	0.171166	0.548506	0.332854	0.203303	0.124938		6515.07	7700.96	31.147	30.4704	384.647	403.623	139.843	135.616	220.324	218.716	335.405	345.659	485.472
															1.5	1319.84	4	58	25.96	10.52	1.52	96		60.4167	27.0417	10.9583	1.58333	100	0.0792856	0.503755	0.170754	0.547104	0.332026	0.202809	0.124642		6456.59	7669.85	31.1847	30.4883	383.637	403.124	140.081	135.728	220.413	218.759	334.853	345.389	483.098
															1.5	1320.27	4.1	58.025	25.909	10.458	1.508	95.9		60.5057	27.0167	10.9051	1.57247	100	0.0790479	0.502627	0.170342	0.545698	0.331195	0.202315	0.124345		6398.4	7638.84	31.2226	30.5062	382.627	402.624	140.32	135.84	220.502	218.801	334.3	345.118	480.726
															1.5	1320.7	4.2	58.05	25.858	10.396	1.496	95.8		60.595	26.9916	10.8518	1.56159	100	0.0788098	0.501496	0.169928	0.54429	0.330363	0.201819	0.124048		6340.51	7607.92	31.2606	30.5242	381.616	402.123	140.561	135.952	220.592	218.844	333.745	344.848	478.358
															1.5	1321.14	4.3	58.075	25.807	10.334	1.484	95.7		60.6844	26.9666	10.7983	1.55068	100	0.0785711	0.500362	0.169514	0.542878	0.329529	0.201323	0.12375		6282.9	7577.11	31.2988	30.5422	380.604	401.623	140.803	136.065	220.682	218.887	333.19	344.577	475.994
															1.5	1321.57	4.4	58.1	25.756	10.272	1.472	95.6		60.7741	26.9414	10.7448	1.53975	100	0.0783319	0.499227	0.169099	0.541464	0.328694	0.200826	0.123452		6225.59	7546.39	31.3372	30.5603	379.592	401.122	141.046	136.178	220.772	218.929	332.633	344.305	473.634
															1.5	1322.01	4.5	58.125	25.705	10.21	1.46	95.5		60.8639	26.9162	10.6911	1.5288	100	0.0780923	0.498088	0.168683	0.540047	0.327856	0.200327	0.123153		6168.57	7515.78	31.3758	30.5784	378.578	400.621	141.29	136.292	220.863	218.972	332.076	344.033	471.277
															1.5	1322.44	4.6	58.15	25.654	10.148	1.448	95.4		60.9539	26.891	10.6373	1.51782	100	0.0778521	0.496948	0.168266	0.538627	0.327017	0.199827	0.122853		6111.84	7485.25	31.4145	30.5966	377.564	400.12	141.536	136.406	220.954	219.015	331.517	343.761	468.923
															1.5	1322.88	4.7	58.175	25.603	10.086	1.436	95.3		61.0441	26.8657	10.5834	1.50682	100	0.0776114	0.495805	0.167848	0.537203	0.326176	0.199327	0.122553		6055.4	7454.83	31.4535	30.6148	376.549	399.619	141.783	136.52	221.046	219.059	330.958	343.489	466.574
															1.5	1323.31	4.8	58.2	25.552	10.024	1.424	95.2		61.1345	26.8403	10.5294	1.4958	100	0.0773702	0.49466	0.167429	0.535777	0.325333	0.198825	0.122252		5999.25	7424.51	31.4926	30.6331	375.533	399.117	142.032	136.635	221.137	219.102	330.397	343.216	464.227
															1.5	1323.75	4.9	58.225	25.501	9.962	1.412	95.1		61.225	26.8149	10.4753	1.48475	100	0.0771285	0.493512	0.167009	0.534348	0.324489	0.198322	0.12195		5943.4	7394.28	31.5318	30.6514	374.516	398.615	142.281	136.75	221.23	219.145	329.836	342.943	461.885
															1.5	1324.18	5	58.25	25.45	9.9	1.4	95		61.3158	26.7895	10.4211	1.47368	100	0.0768863	0.492362	0.166589	0.532916	0.323643	0.197819	0.121648		5887.83	7364.15	31.5713	30.6698	373.498	398.112	142.533	136.866	221.322	219.189	329.273	342.67	459.546
															1.5	1324.62	5.1	58.275	25.399	9.838	1.388	94.9		61.4067	26.764	10.3667	1.46259	100	0.0766436	0.49121	0.166168	0.53148	0.322795	0.197314	0.121345		5832.55	7334.12	31.611	30.6883	372.48	397.61	142.785	136.982	221.415	219.233	328.709	342.396	457.211
															1.5	1325.05	5.2	58.3	25.348	9.776	1.376	94.8		61.4979	26.7384	10.3122	1.45148	100	0.0764004	0.490055	0.165745	0.530042	0.321945	0.196808	0.121042		5777.56	7304.19	31.6508	30.7068	371.46	397.107	143.039	137.098	221.509	219.276	328.144	342.122	454.879
															1.5	1325.49	5.3	58.325	25.297	9.714	1.364	94.7		61.5892	26.7128	10.2577	1.44034	100	0.0761567	0.488897	0.165322	0.528601	0.321093	0.196301	0.120738		5722.86	7274.35	31.6908	30.7253	370.44	396.604	143.295	137.215	221.602	219.32	327.578	341.847	452.551
															1.5	1325.92	5.4	58.35	25.246	9.652	1.352	94.6		61.6808	26.6871	10.203	1.42918	100	0.0759124	0.487738	0.164898	0.527156	0.32024	0.195793	0.120433		5668.44	7244.61	31.731	30.744	369.419	396.1	143.551	137.333	221.697	219.364	327.011	341.573	450.226
															1.5	1326.36	5.5	58.375	25.195	9.59	1.34	94.5		61.7725	26.6614	10.1481	1.41799	100	0.0756676	0.486575	0.164473	0.525709	0.319385	0.195283	0.120128		5614.32	7214.97	31.7714	30.7627	368.397	395.597	143.81	137.45	221.791	219.408	326.443	341.298	447.906
															1.5	1326.79	5.6	58.4	25.144	9.528	1.328	94.4		61.8644	26.6356	10.0932	1.40678	100	0.0754223	0.485411	0.164047	0.524259	0.318528	0.194773	0.119822		5560.48	7185.43	31.812	30.7814	367.374	395.093	144.069	137.569	221.886	219.453	325.874	341.022	445.589
															1.5	1327.23	5.7	58.425	25.093	9.466	1.316	94.3		61.9565	26.6098	10.0382	1.39555	100	0.0751765	0.484243	0.16362	0.522805	0.317669	0.194262	0.119515		5506.93	7155.98	31.8528	30.8002	366.35	394.588	144.331	137.687	221.981	219.497	325.304	340.746	443.275
															1.5	1327.66	5.8	58.45	25.042	9.404	1.304	94.2		62.0488	26.5839	9.98301	1.38429	100	0.0749302	0.483074	0.163193	0.521348	0.316808	0.19375	0.119208		5453.67	7126.63	31.8938	30.819	365.325	394.084	144.593	137.806	222.077	219.541	324.733	340.47	440.966
															1.5	1328.1	5.9	58.475	24.991	9.342	1.292	94.1		62.1413	26.5579	9.92774	1.37301	100	0.0746834	0.481901	0.162764	0.519889	0.315946	0.193236	0.1189		5400.69	7097.37	31.935	30.838	364.299	393.579	144.857	137.926	222.173	219.586	324.16	340.194	438.66
															1.5	1328.53	6	58.5	24.94	9.28	1.28	94		62.234	26.5319	9.87234	1.3617	100	0.074436	0.480727	0.162335	0.518426	0.315081	0.192722	0.118591		5348	7068.22	31.9763	30.8569	363.273	393.074	145.123	138.046	222.27	219.631	323.587	339.917	436.357
															1.5	1328.97	6.1	58.525	24.889	9.218	1.268	93.9		62.3269	26.5059	9.81683	1.35037	100	0.0741881	0.47955	0.161904	0.51696	0.314215	0.192206	0.118282		5295.6	7039.16	32.0179	30.876	362.246	392.569	145.39	138.166	222.367	219.676	323.012	339.64	434.059
															1.5	1329.4	6.2	58.55	24.838	9.156	1.256	93.8		62.42	26.4797	9.76119	1.33902	100	0.0739396	0.47837	0.161473	0.515491	0.313347	0.191689	0.117972		5243.49	7010.2	32.0597	30.8951	361.217	392.063	145.659	138.287	222.464	219.721	322.436	339.363	431.764
															1.5	1329.84	6.3	58.575	24.787	9.094	1.244	93.7		62.5133	26.4536	9.70544	1.32764	100	0.0736907	0.477188	0.161041	0.514018	0.312477	0.191171	0.117661		5191.66	6981.33	32.1016	30.9142	360.188	391.557	145.929	138.408	222.562	219.766	321.859	339.085	429.473
															1.5	1330.27	6.4	58.6	24.736	9.032	1.232	93.6		62.6068	26.4274	9.64957	1.31624	100	0.0734412	0.476003	0.160608	0.512543	0.311606	0.190652	0.11735		5140.11	6952.56	32.1438	30.9334	359.158	391.051	146.201	138.53	222.66	219.811	321.281	338.807	427.185
															1.5	1330.7	6.5	58.625	24.685	8.97	1.22	93.5		62.7005	26.4011	9.59358	1.30481	100	0.0731912	0.474816	0.160174	0.511065	0.310732	0.190132	0.117038		5088.85	6923.89	32.1862	30.9527	358.127	390.544	146.475	138.652	222.759	219.856	320.702	338.528	424.901
															1.5	1331.14	6.6	58.65	24.634	8.908	1.208	93.4		62.7944	26.3747	9.53747	1.29336	100	0.0729406	0.473626	0.159739	0.509583	0.309857	0.189611	0.116725		5037.88	6895.31	32.2288	30.972	357.095	390.037	146.75	138.775	222.858	219.902	320.121	338.249	422.621
															1.5	1331.57	6.7	58.675	24.583	8.846	1.196	93.3		62.8885	26.3483	9.48124	1.28189	100	0.0726895	0.472434	0.159303	0.508098	0.308979	0.189089	0.116412		4987.18	6866.83	32.2716	30.9914	356.062	389.53	147.026	138.898	222.958	219.947	319.54	337.97	420.345
															1.5	1332.01	6.8	58.7	24.532	8.784	1.184	93.2		62.9828	26.3219	9.42489	1.27039	100	0.0724378	0.471239	0.158866	0.50661	0.3081	0.188565	0.116098		4936.78	6838.45	32.3146	31.0109	355.028	389.023	147.305	139.022	223.058	219.993	318.957	337.69	418.073
															1.5	1332.44	6.9	58.725	24.481	8.722	1.172	93.1		63.0773	26.2954	9.36842	1.25886	100	0.0721857	0.470041	0.158428	0.505119	0.307219	0.188041	0.115783		4886.66	6810.16	32.3578	31.0304	353.993	388.515	147.585	139.146	223.158	220.039	318.373	337.41	415.804
															1.5	1332.88	7	58.75	24.43	8.66	1.16	93		63.172	26.2688	9.31183	1.24731	100	0.0719329	0.468841	0.157989	0.503624	0.306336	0.187515	0.115468		4836.82	6781.97	32.4013	31.05	352.957	388.007	147.866	139.27	223.259	220.085	317.788	337.13	413.539
															1.5	1333.31	7.1	58.775	24.379	8.598	1.148	92.9		63.267	26.2422	9.25511	1.23574	100	0.0716797	0.467639	0.157549	0.502127	0.305451	0.186988	0.115152		4787.26	6753.88	32.445	31.0696	351.921	387.499	148.149	139.395	223.36	220.131	317.202	336.849	411.278
															1.5	1333.75	7.2	58.8	24.328	8.536	1.136	92.8		63.3621	26.2155	9.19828	1.22414	100	0.0714259	0.466433	0.157109	0.500626	0.304564	0.18646	0.114835		4737.99	6725.88	32.4888	31.0893	350.883	386.99	148.434	139.521	223.462	220.177	316.614	336.568	409.021
															1.5	1334.18	7.3	58.825	24.277	8.474	1.124	92.7		63.4574	26.1888	9.14132	1.21251	100	0.0711715	0.465226	0.156667	0.499121	0.303675	0.185931	0.114518		4689	6697.98	32.5329	31.1091	349.845	386.482	148.721	139.647	223.564	220.224	316.026	336.287	406.767
															1.5	1334.62	7.4	58.85	24.226	8.412	1.112	92.6		63.5529	26.162	9.08423	1.20086	100	0.0709166	0.464015	0.156225	0.497614	0.302785	0.185401	0.1142		4640.29	6670.17	32.5773	31.129	348.805	385.972	149.01	139.774	223.667	220.27	315.436	336.005	404.517
															1.5	1335.05	7.5	58.875	24.175	8.35	1.1	92.5		63.6486	26.1351	9.02703	1.18919	100	0.0706611	0.462802	0.155781	0.496103	0.301892	0.184869	0.113881		4591.86	6642.46	32.6218	31.1489	347.765	385.463	149.3	139.901	223.77	220.317	314.845	335.723	402.272
															1.5	1335.49	7.6	58.9	24.124	8.288	1.088	92.4		63.7446	26.1082	8.9697	1.17749	100	0.0704051	0.461586	0.155337	0.494589	0.300998	0.184337	0.113561		4543.72	6614.85	32.6666	31.1688	346.723	384.953	149.592	140.028	223.873	220.364	314.252	335.44	400.029
															1.5	1335.92	7.7	58.925	24.073	8.226	1.076	92.3		63.8407	26.0813	8.91224	1.16576	100	0.0701485	0.460368	0.154891	0.493072	0.300101	0.183803	0.113241		4495.86	6587.33	32.7116	31.1889	345.681	384.443	149.886	140.156	223.977	220.411	313.659	335.158	397.791
															1.5	1336.36	7.8	58.95	24.022	8.164	1.064	92.2		63.9371	26.0542	8.85466	1.15401	100	0.0698914	0.459147	0.154445	0.491552	0.299203	0.183268	0.11292		4448.27	6559.9	32.7568	31.209	344.637	383.933	150.181	140.285	224.082	220.458	313.064	334.874	395.557
															1.5	1336.79	7.9	58.975	23.971	8.102	1.052	92.1		64.0337	26.0271	8.79696	1.14224	100	0.0696337	0.457924	0.153997	0.490028	0.298303	0.182732	0.112599		4400.97	6532.57	32.8023	31.2291	343.593	383.422	150.478	140.414	224.187	220.505	312.468	334.591	393.326
															1.5	1337.23	8	59	23.92	8.04	1.04	92		64.1304	26	8.73913	1.13043	100	0.0693755	0.456697	0.153549	0.488501	0.2974	0.182195	0.112277		4353.95	6505.34	32.848	31.2494	342.547	382.911	150.778	140.543	224.292	220.552	311.871	334.307	391.099
															1.5	1337.66	8.1	59.025	23.869	7.978	1.028	91.9		64.2274	25.9728	8.68118	1.11861	100	0.0691167	0.455468	0.1531	0.48697	0.296496	0.181657	0.111954		4307.21	6478.2	32.8939	31.2697	341.501	382.4	151.079	140.673	224.398	220.6	311.272	334.022	388.877
															1.5	1338.1	8.2	59.05	23.818	7.916	1.016	91.8		64.3246	25.9455	8.62309	1.10675	100	0.0688573	0.454237	0.152649	0.485437	0.29559	0.181117	0.11163		4260.75	6451.16	32.9401	31.2901	340.454	381.889	151.382	140.804	224.505	220.647	310.672	333.738	386.658
															1.5	1338.53	8.3	59.075	23.767	7.854	1.004	91.7		64.422	25.9182	8.56489	1.09487	100	0.0685974	0.453002	0.152198	0.4839	0.294682	0.180577	0.111306		4214.56	6424.21	32.9865	31.3105	339.405	381.377	151.687	140.935	224.612	220.695	310.071	333.452	384.442
															1.5	1338.97	8.4	59.1	23.716	7.792	0.992	91.6		64.5197	25.8908	8.50655	1.08297	100	0.0683369	0.451765	0.151746	0.482359	0.293771	0.180035	0.110981		4168.66	6397.36	33.0332	31.331	338.356	380.865	151.993	141.067	224.719	220.743	309.469	333.167	382.231
															1.5	1339.4	8.5	59.125	23.665	7.73	0.98	91.5		64.6175	25.8634	8.44809	1.07104	100	0.0680758	0.450526	0.151293	0.480815	0.292859	0.179492	0.110655		4123.04	6370.61	33.0801	31.3516	337.306	380.352	152.302	141.199	224.827	220.791	308.865	332.881	380.024
															1.5	1339.84	8.6	59.15	23.614	7.668	0.968	91.4		64.7155	25.8359	8.3895	1.05908	100	0.0678142	0.449283	0.150838	0.479268	0.291945	0.178947	0.110328		4077.69	6343.94	33.1272	31.3722	336.254	379.839	152.613	141.332	224.936	220.839	308.26	332.595	377.821
															1.5	1340.27	8.7	59.175	23.563	7.606	0.956	91.3		64.8138	25.8083	8.33078	1.0471	100	0.0675519	0.448038	0.150383	0.477717	0.291029	0.178402	0.110001		4032.62	6317.38	33.1747	31.3929	335.202	379.326	152.926	141.465	225.045	220.888	307.654	332.308	375.621
															1.5	1340.7	8.8	59.2	23.512	7.544	0.944	91.2		64.9123	25.7807	8.27193	1.03509	100	0.0672891	0.44679	0.149927	0.476163	0.290111	0.177855	0.109673		3987.83	6290.91	33.2223	31.4137	334.148	378.813	153.24	141.599	225.154	220.936	307.046	332.021	373.425
															1.5	1341.14	8.9	59.225	23.461	7.482	0.932	91.1		65.011	25.753	8.21295	1.02305	100	0.0670258	0.44554	0.14947	0.474606	0.289191	0.177308	0.109345		3943.32	6264.53	33.2702	31.4346	333.094	378.299	153.557	141.733	225.264	220.985	306.437	331.733	371.234
															1.5	1341.57	9	59.25	23.41	7.42	0.92	91		65.1099	25.7253	8.15385	1.01099	100	0.0667618	0.444286	0.149011	0.473045	0.288268	0.176758	0.109015		3899.08	6238.24	33.3184	31.4555	332.038	377.785	153.876	141.868	225.375	221.034	305.827	331.446	369.046
															1.5	1342.01	9.1	59.275	23.359	7.358	0.908	90.9		65.209	25.6975	8.09461	0.9989	100	0.0664973	0.44303	0.148552	0.471481	0.287344	0.176208	0.108685		3855.12	6212.06	33.3668	31.4765	330.982	377.271	154.197	142.003	225.486	221.082	305.215	331.157	366.862
															1.5	1342.44	9.2	59.3	23.308	7.296	0.896	90.8		65.3084	25.6696	8.03524	0.986784	100	0.0662322	0.441771	0.148092	0.469913	0.286418	0.175657	0.108355		3811.44	6185.96	33.4155	31.4976	329.924	376.756	154.52	142.139	225.598	221.132	304.602	330.869	364.683
															1.5	1342.88	9.3	59.325	23.257	7.234	0.884	90.7		65.4079	25.6417	7.97574	0.974642	100	0.0659665	0.44051	0.147631	0.468342	0.285489	0.175104	0.108023		3768.03	6159.96	33.4645	31.5187	328.865	376.241	154.845	142.276	225.71	221.181	303.988	330.58	362.507
															1.5	1343.31	9.4	59.35	23.206	7.172	0.872	90.6		65.5077	25.6137	7.91611	0.962472	100	0.0657002	0.439245	0.147168	0.466767	0.284559	0.17455	0.107691		3724.9	6134.06	33.5137	31.54	327.806	375.726	155.172	142.413	225.822	221.23	303.372	330.29	360.335
															1.5	1343.75	9.5	59.375	23.155	7.11	0.86	90.5		65.6077	25.5856	7.85635	0.950276	100	0.0654333	0.437978	0.146705	0.465189	0.283627	0.173995	0.107358		3682.04	6108.25	33.5632	31.5613	326.745	375.21	155.501	142.551	225.936	221.28	302.755	330	358.167
															1.5	1344.18	9.6	59.4	23.104	7.048	0.848	90.4		65.708	25.5575	7.79646	0.938053	100	0.0651659	0.436708	0.146241	0.463608	0.282692	0.173439	0.107024		3639.46	6082.53	33.613	31.5826	325.683	374.694	155.833	142.689	226.049	221.329	302.136	329.71	356.003
															1.5	1344.62	9.7	59.425	23.053	6.986	0.836	90.3		65.8084	25.5293	7.73643	0.925803	100	0.0648978	0.435435	0.145775	0.462023	0.281756	0.172881	0.10669		3597.15	6056.91	33.663	31.6041	324.62	374.178	156.167	142.828	226.164	221.379	301.517	329.42	353.844
															1.5	1345.05	9.8	59.45	23.002	6.924	0.824	90.2		65.9091	25.5011	7.67627	0.913525	100	0.0646292	0.43416	0.145309	0.460434	0.280817	0.172322	0.106354		3555.12	6031.38	33.7133	31.6256	323.556	373.662	156.503	142.968	226.279	221.429	300.895	329.128	351.688
															1.5	1345.49	9.9	59.475	22.951	6.862	0.812	90.1		66.01	25.4728	7.61598	0.901221	100	0.0643599	0.432881	0.144841	0.458842	0.279876	0.171762	0.106018		3513.36	6005.95	33.7639	31.6472	322.491	373.145	156.841	143.108	226.394	221.479	300.273	328.837	349.536
															1.5	1345.92	10	59.5	22.9	6.8	0.8	90		66.1111	25.4444	7.55556	0.888889	100	0.0640901	0.4316	0.144373	0.457246	0.278933	0.171201	0.105682		3471.87	5980.6	33.8148	31.6689	321.425	372.628	157.182	143.249	226.51	221.53	299.648	328.545	347.388
															1.5	1346.36	10.1	59.525	22.849	6.738	0.788	89.9		66.2125	25.416	7.49499	0.876529	100	0.0638196	0.430316	0.143903	0.455647	0.277988	0.170638	0.105344		3430.66	5955.36	33.866	31.6906	320.357	372.11	157.524	143.39	226.627	221.58	299.023	328.253	345.245
															1.5	1346.79	10.2	59.55	22.798	6.676	0.776	89.8		66.314	25.3875	7.4343	0.864143	100	0.0635486	0.429029	0.143433	0.454044	0.277041	0.170075	0.105006		3389.72	5930.2	33.9174	31.7125	319.289	371.592	157.87	143.532	226.744	221.631	298.396	327.96	343.105
															1.5	1347.23	10.3	59.575	22.747	6.614	0.764	89.7		66.4158	25.359	7.37347	0.851728	100	0.063277	0.427739	0.142961	0.452438	0.276092	0.16951	0.104667		3349.05	5905.14	33.9692	31.7344	318.219	371.074	158.217	143.675	226.862	221.682	297.767	327.667	340.969
															1.5	1347.66	10.4	59.6	22.696	6.552	0.752	89.6		66.5179	25.3304	7.3125	0.839286	100	0.0630047	0.426446	0.142488	0.450828	0.275141	0.168943	0.104327		3308.65	5880.18	34.0212	31.7564	317.149	370.556	158.567	143.818	226.981	221.733	297.137	327.373	338.838
															1.5	1348.1	10.5	59.625	22.645	6.49	0.74	89.5		66.6201	25.3017	7.2514	0.826816	100	0.0627318	0.42515	0.142015	0.449214	0.274188	0.168376	0.103987		3268.53	5855.31	34.0735	31.7784	316.077	370.037	158.92	143.962	227.1	221.784	296.506	327.079	336.711
															1.5	1348.53	10.6	59.65	22.594	6.428	0.728	89.4		66.7226	25.2729	7.19016	0.814318	100	0.0624584	0.423852	0.14154	0.447597	0.273232	0.167807	0.103646		3228.68	5830.53	34.1262	31.8006	315.004	369.517	159.275	144.106	227.22	221.835	295.873	326.785	334.587
															1.5	1348.97	10.7	59.675	22.543	6.366	0.716	89.3		66.8253	25.2441	7.12878	0.801792	100	0.0621843	0.42255	0.141064	0.445976	0.272275	0.167237	0.103304		3189.09	5805.84	34.1791	31.8228	313.93	368.998	159.632	144.251	227.34	221.886	295.239	326.49	332.468
															1.5	1349.4	10.8	59.7	22.492	6.304	0.704	89.2		66.9283	25.2152	7.06726	0.789238	100	0.0619096	0.421246	0.140587	0.444352	0.271315	0.166665	0.102961		3149.78	5781.25	34.2324	31.8451	312.855	368.478	159.992	144.397	227.461	221.938	294.603	326.195	330.353
															1.5	1349.84	10.9	59.725	22.441	6.242	0.692	89.1		67.0314	25.1863	7.00561	0.776655	100	0.0616342	0.419938	0.140109	0.442724	0.270353	0.166093	0.102618		3110.74	5756.75	34.2859	31.8675	311.778	367.958	160.354	144.543	227.582	221.99	293.965	325.899	328.242
															1.5	1350.27	11	59.75	22.39	6.18	0.68	89		67.1348	25.1573	6.94382	0.764045	100	0.0613583	0.418628	0.13963	0.441092	0.269389	0.165519	0.102273		3071.97	5732.34	34.3398	31.89	310.701	367.437	160.719	144.69	227.705	222.042	293.326	325.603	326.135
															1.5	1350.7	11.1	59.775	22.339	6.118	0.668	88.9		67.2385	25.1282	6.88189	0.751406	100	0.0610818	0.417315	0.13915	0.439456	0.268422	0.164943	0.101928		3033.47	5708.03	34.394	31.9126	309.622	366.917	161.087	144.838	227.828	222.094	292.686	325.307	324.033
															1.5	1351.14	11.2	59.8	22.288	6.056	0.656	88.8		67.3423	25.0991	6.81982	0.738739	100	0.0608046	0.415999	0.138669	0.437817	0.267454	0.164367	0.101582		2995.24	5683.8	34.4485	31.9352	308.542	366.395	161.457	144.986	227.951	222.146	292.044	325.01	321.934
															1.5	1351.57	11.3	59.825	22.237	5.994	0.644	88.7		67.4464	25.0699	6.75761	0.726043	100	0.0605268	0.414679	0.138186	0.436175	0.266483	0.163789	0.101236		2957.27	5659.68	34.5033	31.9579	307.461	365.874	161.83	145.136	228.075	222.199	291.4	324.712	319.84
															1.5	1352.01	11.4	59.85	22.186	5.932	0.632	88.6		67.5508	25.0406	6.69526	0.713318	100	0.0602483	0.413357	0.137703	0.434528	0.26551	0.16321	0.100888		2919.58	5635.64	34.5584	31.9807	306.379	365.352	162.206	145.285	228.2	222.251	290.755	324.414	317.75
															1.5	1352.44	11.5	59.875	22.135	5.87	0.62	88.5		67.6554	25.0113	6.63277	0.700565	100	0.0599693	0.412032	0.137218	0.432878	0.264535	0.162629	0.10054		2882.15	5611.7	34.6139	32.0036	305.296	364.83	162.584	145.436	228.326	222.304	290.108	324.116	315.664
															1.5	1352.88	11.6	59.9	22.084	5.808	0.608	88.4		67.7602	24.9819	6.57014	0.687783	100	0.0596896	0.410704	0.136733	0.431224	0.263558	0.162047	0.100191		2844.99	5587.85	34.6697	32.0266	304.211	364.307	162.965	145.587	228.452	222.357	289.46	323.817	313.582
															1.5	1353.31	11.7	59.925	22.033	5.746	0.596	88.3		67.8652	24.9524	6.50736	0.674972	100	0.0594092	0.409373	0.136246	0.429566	0.262579	0.161464	0.0998413		2808.1	5564.09	34.7258	32.0497	303.125	363.784	163.349	145.739	228.579	222.41	288.81	323.518	311.504
															1.5	1353.75	11.8	59.95	21.982	5.684	0.584	88.2		67.9705	24.9229	6.44444	0.662132	100	0.0591283	0.408039	0.135758	0.427905	0.261597	0.16088	0.0994907		2771.47	5540.42	34.7823	32.0728	302.038	363.261	163.736	145.891	228.706	222.464	288.158	323.218	309.431
															1.5	1354.18	11.9	59.975	21.931	5.622	0.572	88.1		68.076	24.8933	6.38138	0.649262	100	0.0588467	0.406702	0.135269	0.42624	0.260613	0.160294	0.0991393		2735.11	5516.85	34.8391	32.0961	300.95	362.737	164.125	146.044	228.834	222.517	287.505	322.918	307.362
															1.5	1354.62	12	60	21.88	5.56	0.56	88		68.1818	24.8636	6.31818	0.636364	100	0.0585644	0.405361	0.134779	0.424571	0.259627	0.159707	0.0987872		2699.02	5493.36	34.8963	32.1194	299.861	362.213	164.518	146.198	228.963	222.571	286.85	322.618	305.297
															1.5	1355.05	12.1	60.025	21.829	5.498	0.548	87.9		68.2878	24.8339	6.25484	0.623436	100	0.0582816	0.404018	0.134288	0.422898	0.258639	0.159119	0.0984342		2663.19	5469.97	34.9538	32.1428	298.77	361.689	164.913	146.353	229.093	222.625	286.194	322.317	303.236
															1.5	1355.49	12.2	60.05	21.778	5.436	0.536	87.8		68.3941	24.8041	6.19134	0.610478	100	0.057998	0.402672	0.133796	0.421221	0.257648	0.158529	0.0980804		2627.63	5446.68	35.0117	32.1664	297.678	361.164	165.312	146.508	229.223	222.679	285.536	322.015	301.18
															1.5	1355.92	12.3	60.075	21.727	5.374	0.524	87.7		68.5006	24.7742	6.12771	0.597491	100	0.0577139	0.401323	0.133303	0.419541	0.256655	0.157938	0.0977258		2592.33	5423.47	35.0699	32.19	296.585	360.639	165.713	146.665	229.355	222.733	284.876	321.713	299.128
															1.5	1356.36	12.4	60.1	21.676	5.312	0.512	87.6		68.6073	24.7443	6.06393	0.584475	100	0.057429	0.39997	0.132808	0.417856	0.25566	0.157345	0.0973705		2557.3	5400.36	35.1285	32.2137	295.491	360.114	166.118	146.821	229.486	222.788	284.214	321.411	297.08
															1.5	1356.79	12.5	60.125	21.625	5.25	0.5	87.5		68.7143	24.7143	6	0.571429	100	0.0571436	0.398614	0.132313	0.416168	0.254663	0.156751	0.0970143		2522.53	5377.33	35.1874	32.2375	294.395	359.588	166.525	146.979	229.619	222.842	283.551	321.108	295.037
															1.5	1357.23	12.6	60.15	21.574	5.188	0.488	87.4		68.8215	24.6842	5.93593	0.558352	100	0.0568574	0.397256	0.131816	0.414476	0.253663	0.156156	0.0966572		2488.03	5354.4	35.2467	32.2613	293.298	359.062	166.936	147.137	229.752	222.897	282.886	320.805	292.998
															1.5	1357.66	12.7	60.175	21.523	5.126	0.476	87.3		68.929	24.6541	5.87171	0.545246	100	0.0565707	0.395894	0.131318	0.41278	0.252661	0.15556	0.0962994		2453.79	5331.56	35.3064	32.2853	292.2	358.536	167.35	147.297	229.886	222.952	282.22	320.501	290.963
															1.5	1358.1	12.8	60.2	21.472	5.064	0.464	87.2		69.0367	24.6239	5.80734	0.53211	100	0.0562832	0.394529	0.130819	0.411081	0.251657	0.154962	0.0959408		2419.81	5308.82	35.3665	32.3094	291.1	358.009	167.767	147.456	230.021	223.007	281.551	320.196	288.932
															1.5	1358.53	12.9	60.225	21.421	5.002	0.452	87.1		69.1447	24.5936	5.74282	0.518944	100	0.0559951	0.393161	0.130319	0.409377	0.25065	0.154363	0.0955813		2386.09	5286.16	35.427	32.3336	290	357.482	168.187	147.617	230.157	223.063	280.881	319.892	286.906
															1.5	1358.97	13	60.25	21.37	4.94	0.44	87		69.2529	24.5632	5.67816	0.505747	100	0.0557064	0.39179	0.129817	0.407669	0.249641	0.153762	0.095221		2352.64	5263.59	35.4878	32.3578	288.897	356.954	168.611	147.779	230.293	223.118	280.209	319.586	284.884
															1.5	1359.4	13.1	60.275	21.319	4.878	0.428	86.9		69.3613	24.5328	5.61335	0.49252	100	0.0554169	0.390416	0.129315	0.405958	0.24863	0.15316	0.0948598		2319.45	5241.12	35.549	32.3822	287.794	356.426	169.038	147.941	230.431	223.174	279.535	319.281	282.867
															1.5	1359.84	13.2	60.3	21.268	4.816	0.416	86.8		69.47	24.5023	5.54839	0.479263	100	0.0551268	0.389038	0.128811	0.404242	0.247616	0.152556	0.0944979		2286.52	5218.74	35.6106	32.4066	286.689	355.898	169.468	148.104	230.569	223.23	278.86	318.974	280.854
															1.5	1360.27	13.3	60.325	21.217	4.754	0.404	86.7		69.579	24.4717	5.48328	0.465975	100	0.0548361	0.387657	0.128306	0.402523	0.2466	0.151952	0.0941351		2253.85	5196.44	35.6726	32.4312	285.583	355.369	169.902	148.268	230.708	223.286	278.183	318.668	278.845
															1.5	1360.7	13.4	60.35	21.166	4.692	0.392	86.6		69.6882	24.4411	5.41801	0.452656	100	0.0545446	0.386274	0.127801	0.4008	0.245582	0.151345	0.0937714		2221.44	5174.24	35.735	32.4558	284.476	354.84	170.34	148.433	230.847	223.343	277.503	318.361	276.841
															1.5	1361.14	13.5	60.375	21.115	4.63	0.38	86.5		69.7977	24.4104	5.3526	0.439306	100	0.0542525	0.384887	0.127293	0.399072	0.244561	0.150738	0.093407		2189.29	5152.13	35.7979	32.4806	283.367	354.311	170.78	148.598	230.988	223.4	276.822	318.053	274.841
															1.5	1361.57	13.6	60.4	21.064	4.568	0.368	86.4		69.9074	24.3796	5.28704	0.425926	100	0.0539597	0.383496	0.126785	0.397341	0.243538	0.150129	0.0930416		2157.4	5130.11	35.8611	32.5055	282.257	353.781	171.225	148.765	231.129	223.456	276.14	317.745	272.846
															1.5	1362.01	13.7	60.425	21.013	4.506	0.356	86.3		70.0174	24.3488	5.22132	0.412514	100	0.0536663	0.382103	0.126276	0.395606	0.242513	0.149518	0.0926755		2125.77	5108.18	35.9247	32.5304	281.146	353.251	171.673	148.932	231.271	223.513	275.455	317.436	270.855
															1.5	1362.44	13.8	60.45	20.962	4.444	0.344	86.2		70.1276	24.3179	5.15545	0.399072	100	0.0533721	0.380706	0.125765	0.393866	0.241485	0.148906	0.0923085		2094.4	5086.34	35.9888	32.5555	280.033	352.72	172.125	149.1	231.414	223.571	274.768	317.127	268.868
															1.5	1362.88	13.9	60.475	20.911	4.382	0.332	86.1		70.2381	24.2869	5.08943	0.385598	100	0.0530773	0.379306	0.125253	0.392123	0.240455	0.148293	0.0919406		2063.28	5064.59	36.0533	32.5806	278.919	352.189	172.58	149.269	231.558	223.628	274.08	316.817	266.886
															1.5	1363.31	14	60.5	20.86	4.32	0.32	86		70.3488	24.2558	5.02326	0.372093	100	0.0527818	0.377903	0.12474	0.390375	0.239423	0.147678	0.0915719		2032.43	5042.94	36.1182	32.6059	277.803	351.658	173.039	149.439	231.703	223.686	273.389	316.507	264.909
															1.5	1363.75	14.1	60.525	20.809	4.258	0.308	85.9		70.4598	24.2247	4.95693	0.358556	100	0.0524856	0.376496	0.124226	0.388624	0.238388	0.147062	0.0912023		2001.83	5021.37	36.1836	32.6313	276.686	351.126	173.503	149.609	231.849	223.744	272.697	316.196	262.936
															1.5	1364.18	14.2	60.55	20.758	4.196	0.296	85.8		70.5711	24.1935	4.89044	0.344988	100	0.0521887	0.375087	0.12371	0.386868	0.237351	0.146445	0.0908318		1971.49	4999.89	36.2494	32.6568	275.568	350.594	173.969	149.781	231.995	223.802	272.003	315.885	260.967
															1.5	1364.62	14.3	60.575	20.707	4.134	0.284	85.7		70.6826	24.1622	4.8238	0.331389	100	0.0518911	0.373673	0.123194	0.385108	0.236311	0.145826	0.0904605		1941.41	4978.5	36.3156	32.6824	274.448	350.061	174.44	149.953	232.143	223.86	271.307	315.573	259.003
															1.5	1365.05	14.4	60.6	20.656	4.072	0.272	85.6		70.7944	24.1308	4.75701	0.317757	100	0.0515928	0.372257	0.122676	0.383344	0.235269	0.145205	0.0900883		1911.58	4957.2	36.3823	32.708	273.327	349.529	174.915	150.127	232.291	223.919	270.609	315.261	257.044
															1.5	1365.49	14.5	60.625	20.605	4.01	0.26	85.5		70.9064	24.0994	4.69006	0.304094	100	0.0512939	0.370837	0.122157	0.381576	0.234224	0.144583	0.0897153		1882.01	4935.99	36.4495	32.7338	272.204	348.995	175.394	150.301	232.441	223.977	269.908	314.948	255.089
															1.5	1365.92	14.6	60.65	20.554	3.948	0.248	85.4		71.0187	24.0679	4.62295	0.290398	100	0.0509942	0.369414	0.121636	0.379804	0.233177	0.14396	0.0893414		1852.69	4914.88	36.5171	32.7598	271.08	348.462	175.877	150.476	232.591	224.036	269.206	314.635	253.139
															1.5	1366.36	14.7	60.675	20.503	3.886	0.236	85.3		71.1313	24.0363	4.55569	0.276671	100	0.0506938	0.367988	0.121115	0.378028	0.232127	0.143335	0.0889666		1823.63	4893.85	36.5852	32.7858	269.955	347.928	176.365	150.652	232.742	224.096	268.502	314.321	251.193
															1.5	1366.79	14.8	60.7	20.452	3.824	0.224	85.2		71.2441	24.0047	4.48826	0.262911	100	0.0503927	0.366558	0.120592	0.376248	0.231075	0.142709	0.0885909		1794.83	4872.91	36.6537	32.8119	268.828	347.393	176.856	150.829	232.894	224.155	267.796	314.007	249.252
															1.5	1367.23	14.9	60.725	20.401	3.762	0.212	85.1		71.3572	23.973	4.42068	0.249119	100	0.0500909	0.365125	0.120068	0.374463	0.230021	0.142081	0.0882143		1766.27	4852.06	36.7228	32.8382	267.699	346.858	177.352	151.007	233.048	224.215	267.087	313.692	247.315
															1.5	1367.66	15	60.75	20.35	3.7	0.2	85		71.4706	23.9412	4.35294	0.235294	100	0.0497884	0.363689	0.119543	0.372674	0.228964	0.141452	0.0878369		1737.98	4831.3	36.7923	32.8645	266.569	346.323	177.852	151.186	233.202	224.275	266.377	313.376	245.383
															1.5	1368.1	15.1	60.775	20.299	3.638	0.188	84.9		71.5842	23.9093	4.28504	0.221437	100	0.0494852	0.362249	0.119017	0.370881	0.227905	0.140821	0.0874585		1709.93	4810.63	36.8623	32.891	265.438	345.787	178.357	151.366	233.357	224.335	265.665	313.06	243.456
															1.5	1368.53	15.2	60.8	20.248	3.576	0.176	84.8		71.6981	23.8774	4.21698	0.207547	100	0.0491813	0.360806	0.118489	0.369084	0.226843	0.140189	0.0870793		1682.14	4790.04	36.9328	32.9176	264.305	345.251	178.866	151.547	233.513	224.395	264.95	312.744	241.533
															1.5	1368.97	15.3	60.825	20.197	3.514	0.164	84.7		71.8123	23.8453	4.14876	0.193625	100	0.0488766	0.359359	0.11796	0.367282	0.225778	0.139555	0.0866992		1654.6	4769.55	37.0038	32.9443	263.17	344.715	179.379	151.729	233.67	224.456	264.233	312.427	239.615
															1.5	1369.4	15.4	60.85	20.146	3.452	0.152	84.6		71.9267	23.8132	4.08038	0.179669	100	0.0485713	0.357909	0.11743	0.365477	0.224711	0.13892	0.0863182		1627.31	4749.15	37.0753	32.9711	262.034	344.178	179.897	151.912	233.829	224.517	263.514	312.109	237.702
															1.5	1369.84	15.5	60.875	20.095	3.39	0.14	84.5		72.0414	23.7811	4.01183	0.16568	100	0.0482652	0.356456	0.116898	0.363666	0.223642	0.138283	0.0859362		1600.27	4728.83	37.1474	32.9981	260.897	343.641	180.42	152.096	233.988	224.578	262.793	311.791	235.793
															1.5	1370.27	15.6	60.9	20.044	3.328	0.128	84.4		72.1564	23.7488	3.94313	0.151659	100	0.0479583	0.354999	0.116366	0.361852	0.22257	0.137645	0.0855534		1573.49	4708.6	37.2199	33.0251	259.758	343.103	180.948	152.281	234.148	224.639	262.07	311.472	233.889
															1.5	1370.7	15.7	60.925	19.993	3.266	0.116	84.3		72.2716	23.7165	3.87426	0.137604	100	0.0476508	0.353538	0.115832	0.360033	0.221495	0.137005	0.0851697		1546.95	4688.47	37.293	33.0523	258.617	342.565	181.481	152.467	234.31	224.701	261.345	311.153	231.99
															1.5	1371.14	15.8	60.95	19.942	3.204	0.104	84.2		72.3872	23.6841	3.80523	0.123515	100	0.0473425	0.352075	0.115297	0.358211	0.220418	0.136364	0.084785		1520.67	4668.42	37.3666	33.0796	257.475	342.026	182.018	152.654	234.472	224.763	260.617	310.833	230.095
															1.5	1371.57	15.9	60.975	19.891	3.142	0.092	84.1		72.503	23.6516	3.73603	0.109394	100	0.0470335	0.350607	0.11476	0.356383	0.219339	0.135721	0.0843994		1494.63	4648.46	37.4408	33.1071	256.331	341.487	182.56	152.842	234.636	224.825	259.887	310.513	228.205
															1.5	1372.01	16	61	19.84	3.08	0.08	84		72.619	23.619	3.66667	0.0952381	100	0.0467238	0.349137	0.114222	0.354552	0.218256	0.135077	0.084013		1468.84	4628.58	37.5155	33.1346	255.186	340.948	183.108	153.031	234.801	224.887	259.155	310.192	226.32
															1.5	1372.44	16.1	61.025	19.789	3.018	0.068	83.9		72.7354	23.5864	3.59714	0.0810489	100	0.0464133	0.347662	0.113683	0.352716	0.217172	0.134431	0.0836256		1443.31	4608.8	37.5908	33.1623	254.039	340.408	183.661	153.221	234.967	224.95	258.42	309.87	224.44
															1.5	1372.88	16.2	61.05	19.738	2.956	0.056	83.8		72.852	23.5537	3.52745	0.0668258	100	0.0461021	0.346184	0.113143	0.350875	0.216084	0.133784	0.0832372		1418.02	4589.1	37.6666	33.1901	252.891	339.868	184.219	153.413	235.134	225.013	257.684	309.548	222.565
															1.5	1373.31	16.3	61.075	19.687	2.894	0.044	83.7		72.9689	23.5209	3.45759	0.0525687	100	0.0457901	0.344703	0.112601	0.34903	0.214994	0.133135	0.082848		1392.97	4569.5	37.743	33.218	251.74	339.327	184.782	153.605	235.302	225.076	256.944	309.225	220.694
															1.5	1373.75	16.4	61.1	19.636	2.832	0.032	83.6		73.0861	23.488	3.38756	0.0382775	100	0.0454774	0.343218	0.112058	0.347181	0.213902	0.132485	0.0824578		1368.18	4549.98	37.82	33.2461	250.588	338.786	185.35	153.799	235.471	225.139	256.203	308.902	218.828
															1.5	1374.18	16.5	61.125	19.585	2.77	0.02	83.5		73.2036	23.4551	3.31737	0.0239521	100	0.0451639	0.34173	0.111514	0.345328	0.212806	0.131832	0.0820667		1343.63	4530.54	37.8975	33.2743	249.435	338.245	185.925	153.993	235.642	225.203	255.459	308.578	216.968
															1.5	1374.62	16.6	61.15	19.534	2.708	0.008	83.4		73.3213	23.4221	3.247	0.00959233	100	0.0448497	0.340238	0.110969	0.343469	0.211708	0.131179	0.0816746		1319.33	4511.2	37.9757	33.3026	248.28	337.703	186.504	154.189	235.814	225.267	254.713	308.254	215.111
															1.5	1375.05	16.7	61.175	19.483	2.646	-0.004	83.3		73.4394	23.389	3.17647	-0.00480192	100	0.0445347	0.338742	0.110422	0.341607	0.210608	0.130524	0.0812816		1295.27	4491.94	38.0544	33.331	247.123	337.16	187.09	154.386	235.987	225.331	253.964	307.929	213.26
															1.5	1375.49	16.8	61.2	19.432	2.584	0	83.216		73.5435	23.3513	3.10517	0	100	0.0442682	0.33719	0.110097	0.34035	0.209903	0.130126	0.0810565		1270.08	4472.76	38.1398	33.3597	245.471	336.614	187.345	154.582	235.715	225.393	252.712	307.6	210.979
															1.5	1375.92	16.9	61.225	19.381	2.522	0	83.128		73.6515	23.3146	3.03388	0	100	0.0439888	0.335647	0.109715	0.338938	0.209097	0.129663	0.0807887		1245.54	4453.67	38.2243	33.3885	243.946	336.066	187.686	154.778	235.554	225.453	251.586	307.269	208.821
															1.5	1376.36	17	61.25	19.33	2.46	0	83.04		73.7596	23.2779	2.96243	0	100	0.0437088	0.334101	0.109333	0.337523	0.208289	0.129199	0.0805203		1221.29	4434.65	38.3094	33.4174	242.422	335.515	188.03	154.974	235.392	225.511	250.459	306.934	206.675
															1.5	1376.79	17.1	61.275	19.279	2.398	0	82.952		73.868	23.2412	2.89083	0	100	0.0434282	0.332553	0.108949	0.336106	0.207479	0.128734	0.0802514		1197.33	4415.72	38.3951	33.4465	240.901	334.962	188.375	155.169	235.229	225.568	249.331	306.597	204.541
															1.5	1377.23	17.2	61.3	19.228	2.336	0	82.864		73.9766	23.2043	2.81908	0	100	0.043147	0.331	0.108565	0.334685	0.206668	0.128268	0.0799819		1173.66	4396.87	38.4815	33.4758	239.382	334.406	188.723	155.364	235.066	225.623	248.203	306.258	202.419
															1.5	1377.66	17.3	61.325	19.177	2.274	0	82.776		74.0855	23.1673	2.74717	0	100	0.0428652	0.329445	0.108181	0.333261	0.205855	0.127801	0.0797118		1150.28	4378.11	38.5686	33.5052	237.866	333.848	189.074	155.559	234.901	225.677	247.074	305.916	200.31
															1.5	1378.1	17.4	61.35	19.126	2.212	0	82.688		74.1946	23.1303	2.67512	0	100	0.0425829	0.327886	0.107795	0.331834	0.20504	0.127333	0.0794412		1127.19	4359.42	38.6563	33.5348	236.351	333.288	189.426	155.754	234.735	225.729	245.945	305.571	198.213
															1.5	1378.53	17.5	61.375	19.075	2.15	0	82.6		74.3039	23.0932	2.60291	0	100	0.0422999	0.326324	0.107408	0.330404	0.204224	0.126864	0.0791699		1104.38	4340.82	38.7447	33.5646	234.839	332.725	189.781	155.948	234.568	225.779	244.815	305.224	196.128
															1.5	1378.97	17.6	61.4	19.024	2.088	0	82.512		74.4134	23.056	2.53054	0	100	0.0420163	0.324758	0.107021	0.328971	0.203406	0.126394	0.0788981		1081.86	4322.31	38.8338	33.5945	233.329	332.161	190.139	156.142	234.4	225.828	243.685	304.874	194.056
															1.5	1379.4	17.7	61.425	18.973	2.026	0	82.424		74.5232	23.0188	2.45802	0	100	0.0417321	0.323189	0.106633	0.327534	0.202586	0.125923	0.0786257		1059.62	4303.87	38.9235	33.6246	231.821	331.594	190.499	156.337	234.231	225.876	242.553	304.522	191.995
															1.5	1379.84	17.8	61.45	18.922	1.964	0	82.336		74.6332	22.9814	2.38535	0	100	0.0414473	0.321617	0.106244	0.326095	0.201764	0.125451	0.0783527		1037.67	4285.52	39.014	33.6549	230.316	331.025	190.861	156.53	234.061	225.922	241.422	304.168	189.947
															1.5	1380.27	17.9	61.475	18.871	1.902	0	82.248		74.7435	22.944	2.31252	0	100	0.0411619	0.320042	0.105854	0.324653	0.20094	0.124978	0.0780792		1015.99	4267.26	39.1052	33.6854	228.812	330.454	191.226	156.724	233.89	225.966	240.289	303.811	187.911
															1.5	1380.7	18	61.5	18.82	1.84	0	82.16		74.8539	22.9065	2.23953	0	100	0.0408759	0.318463	0.105463	0.323208	0.200115	0.124503	0.077805		994.597	4249.08	39.1971	33.716	227.311	329.881	191.593	156.918	233.718	226.009	239.157	303.452	185.887
															1.5	1381.14	18.1	61.525	18.769	1.778	0	82.072		74.9647	22.8689	2.16639	0	100	0.0405892	0.31688	0.105072	0.321759	0.199288	0.124028	0.0775303		973.48	4230.98	39.2897	33.7468	225.812	329.306	191.963	157.112	233.544	226.051	238.023	303.09	183.875
															1.5	1381.57	18.2	61.55	18.718	1.716	0	81.984		75.0756	22.8313	2.09309	0	100	0.040302	0.315295	0.10468	0.320308	0.198459	0.123552	0.077255		952.64	4212.97	39.3831	33.7778	224.316	328.729	192.335	157.305	233.37	226.091	236.889	302.727	181.876
															1.5	1382.01	18.3	61.575	18.667	1.654	0	81.896		75.1868	22.7935	2.01963	0	100	0.0400141	0.313706	0.104286	0.318853	0.197629	0.123075	0.0769791		932.076	4195.04	39.4772	33.8089	222.822	328.15	192.711	157.499	233.195	226.13	235.754	302.361	179.888
															1.5	1382.44	18.4	61.6	18.616	1.592	0	81.808		75.2983	22.7557	1.94602	0	100	0.0397256	0.312113	0.103892	0.317395	0.196797	0.122597	0.0767025		911.787	4177.19	39.5721	33.8402	221.33	327.57	193.088	157.692	233.018	226.168	234.619	301.992	177.913
															1.5	1382.88	18.5	61.625	18.565	1.53	0	81.72		75.4099	22.7178	1.87225	0	100	0.0394365	0.310517	0.103498	0.315934	0.195962	0.122118	0.0764254		891.771	4159.43	39.6677	33.8717	219.84	326.987	193.469	157.885	232.84	226.204	233.483	301.622	175.95
															1.5	1383.31	18.6	61.65	18.514	1.468	0	81.632		75.5219	22.6798	1.79831	0	100	0.0391468	0.308918	0.103102	0.31447	0.195126	0.121637	0.0761477		872.027	4141.76	39.7641	33.9034	218.353	326.403	193.852	158.079	232.662	226.238	232.347	301.25	173.998
															1.5	1383.75	18.7	61.675	18.463	1.406	0	81.544		75.634	22.6418	1.72422	0	100	0.0388564	0.307315	0.102705	0.313003	0.194289	0.121156	0.0758694		852.554	4124.17	39.8614	33.9353	216.868	325.817	194.238	158.272	232.482	226.272	231.21	300.875	172.059
															1.5	1384.18	18.8	61.7	18.412	1.344	0	81.456		75.7464	22.6036	1.64997	0	100	0.0385654	0.305708	0.102308	0.311532	0.193449	0.120674	0.0755905		833.35	4106.67	39.9594	33.9673	215.385	325.23	194.627	158.466	232.301	226.304	230.072	300.498	170.132
															1.5	1384.62	18.9	61.725	18.361	1.282	0	81.368		75.8591	22.5654	1.57556	0	100	0.0382738	0.304099	0.10191	0.310059	0.192608	0.120191	0.075311		814.415	4089.25	40.0583	33.9995	213.905	324.641	195.018	158.659	232.118	226.335	228.934	300.12	168.218
															1.5	1385.05	19	61.75	18.31	1.22	0	81.28		75.9719	22.5271	1.50098	0	100	0.0379816	0.302485	0.10151	0.308582	0.191765	0.119706	0.0750309		795.746	4071.91	40.1579	34.0319	212.427	324.05	195.412	158.852	231.935	226.364	227.795	299.739	166.315
															1.5	1385.49	19.1	61.775	18.259	1.158	0	81.192		76.0851	22.4887	1.42625	0	100	0.0376887	0.300869	0.10111	0.307102	0.19092	0.119221	0.0747502		777.342	4054.66	40.2585	34.0645	210.952	323.458	195.81	159.046	231.75	226.392	226.656	299.357	164.424
															1.5	1385.92	19.2	61.8	18.208	1.096	0	81.104		76.1985	22.4502	1.35135	0	100	0.0373952	0.299248	0.100709	0.305618	0.190073	0.118734	0.0744689		759.202	4037.5	40.3598	34.0973	209.479	322.865	196.21	159.239	231.564	226.419	225.516	298.972	162.545
															1.5	1386.36	19.3	61.825	18.157	1.034	0	81.016		76.3121	22.4116	1.27629	0	100	0.037101	0.297625	0.100308	0.304132	0.189224	0.118247	0.0741869		741.325	4020.42	40.4621	34.1303	208.008	322.27	196.613	159.433	231.377	226.445	224.375	298.585	160.678
															1.5	1386.79	19.4	61.85	18.106	0.972	0	80.928		76.426	22.373	1.20107	0	100	0.0368062	0.295997	0.0999051	0.302642	0.188373	0.117758	0.0739044		723.71	4003.43	40.5652	34.1635	206.54	321.673	197.019	159.627	231.189	226.469	223.234	298.197	158.823
															1.5	1387.23	19.5	61.875	18.055	0.91	0	80.84		76.5401	22.3342	1.12568	0	100	0.0365108	0.294366	0.0995015	0.301149	0.187521	0.117268	0.0736212		706.354	3986.52	40.6693	34.1968	205.074	321.075	197.429	159.821	230.999	226.493	222.092	297.807	156.981
															1.5	1387.66	19.6	61.9	18.004	0.848	0	80.752		76.6544	22.2954	1.05013	0	100	0.0362147	0.292732	0.0990972	0.299653	0.186667	0.116778	0.0733374		689.257	3969.7	40.7742	34.2304	203.611	320.476	197.841	160.015	230.808	226.515	220.95	297.415	155.15
															1.5	1388.1	19.7	61.925	17.953	0.786	0	80.664		76.7691	22.2565	0.974412	0	100	0.035918	0.291094	0.0986919	0.298154	0.185811	0.116286	0.073053		672.417	3952.96	40.88	34.2642	202.15	319.875	198.257	160.209	230.616	226.535	219.807	297.021	153.331
															1.5	1388.53	19.8	61.95	17.902	0.724	0	80.576		76.8839	22.2175	0.898531	0	100	0.0356206	0.289452	0.0982857	0.296651	0.184953	0.115793	0.072768		655.832	3936.31	40.9868	34.2981	200.692	319.273	198.676	160.403	230.423	226.555	218.663	296.625	151.524
															1.5	1388.97	19.9	61.975	17.851	0.662	0	80.488		76.9991	22.1785	0.822483	0	100	0.0353226	0.287807	0.0978787	0.295145	0.184093	0.115299	0.0724823		639.502	3919.74	41.0946	34.3323	199.236	318.67	199.098	160.598	230.228	226.573	217.519	296.227	149.729
															1.5	1389.4	20	62	17.8	0.6	0	80.4		77.1144	22.1393	0.746269	0	100	0.0350239	0.286158	0.0974707	0.293636	0.183231	0.114804	0.0721961		623.425	3903.26	41.2033	34.3666	197.783	318.066	199.523	160.792	230.032	226.591	216.375	295.828	147.946
															1.5	1389.84	20.1	62.025	17.749	0.538	0	80.312		77.2301	22.1001	0.669887	0	100	0.0347246	0.284506	0.0970619	0.292123	0.182367	0.114308	0.0719092		607.6	3886.86	41.313	34.4012	196.332	317.46	199.951	160.987	229.835	226.607	215.229	295.427	146.175
															1.5	1390.27	20.2	62.05	17.698	0.476	0	80.224		77.3459	22.0607	0.593339	0	100	0.0344246	0.28285	0.0966522	0.290607	0.181502	0.11381	0.0716216		592.024	3870.55	41.4237	34.4359	194.884	316.853	200.383	161.182	229.636	226.622	214.083	295.024	144.415
															1.5	1390.7	20.3	62.075	17.647	0.414	0	80.136		77.4621	22.0213	0.516622	0	100	0.034124	0.28119	0.0962416	0.289088	0.180634	0.113312	0.0713335		576.697	3854.33	41.5354	34.4709	193.438	316.245	200.819	161.377	229.436	226.636	212.937	294.62	142.668
															1.5	1391.14	20.4	62.1	17.596	0.352	0	80.048		77.5785	21.9818	0.439736	0	100	0.0338227	0.279527	0.09583	0.287565	0.179765	0.112813	0.0710447		561.617	3838.19	41.6481	34.5061	191.995	315.636	201.258	161.573	229.235	226.649	211.79	294.214	140.933
															1.5	1391.57	20.5	62.125	17.545	0.29	0	79.96		77.6951	21.9422	0.362681	0	100	0.0335207	0.27786	0.0954176	0.286039	0.178894	0.112312	0.0707552		546.783	3822.13	41.7619	34.5415	190.554	315.026	201.7	161.769	229.032	226.66	210.642	293.806	139.209
															1.5	1392.01	20.6	62.15	17.494	0.228	0	79.872		77.812	21.9025	0.285457	0	100	0.033218	0.276189	0.0950043	0.28451	0.178021	0.111811	0.0704652		532.194	3806.16	41.8767	34.5771	189.116	314.415	202.146	161.965	228.827	226.671	209.494	293.397	137.497
															1.5	1392.44	20.7	62.175	17.443	0.166	0	79.784		77.9292	21.8628	0.208062	0	100	0.0329147	0.274515	0.09459	0.282977	0.177146	0.111308	0.0701745		517.847	3790.27	41.9927	34.6129	187.681	313.802	202.595	162.161	228.622	226.68	208.345	292.986	135.797
															1.5	1392.88	20.8	62.2	17.392	0.104	0	79.696		78.0466	21.8229	0.130496	0	100	0.0326108	0.272837	0.0941748	0.281441	0.176269	0.110804	0.0698831		503.741	3774.47	42.1097	34.649	186.248	313.189	203.049	162.357	228.415	226.688	207.195	292.574	134.109
															1.5	1393.31	20.9	62.225	17.341	0.042	0	79.608		78.1643	21.783	0.0527585	0	100	0.0323061	0.271155	0.0937587	0.279902	0.17539	0.110299	0.0695911		489.875	3758.76	42.2278	34.6852	184.818	312.575	203.506	162.554	228.206	226.696	206.045	292.16	132.433
															1.5	1393.75	21	62.25	17.29	0	0	79.54		78.2625	21.7375	0	0	100	0.032079	0.269887	0.0934123	0.278682	0.174679	0.109882	0.0693445		475.122	3743.12	42.2819	34.7214	183.253	311.959	203.731	162.75	227.775	226.701	204.731	291.743	130.683
															1.5	1394.18	21.1	62.2307	17.2093	0	0	79.44		78.3367	21.6633	0	0	100	0.0319968	0.269376	0.093154	0.277976	0.174218	0.109581	0.069149		458.664	3727.55	42.2174	34.7569	181.522	311.341	203.58	162.944	227.016	226.702	203.201	291.324	128.852
															1.5	1394.62	21.2	62.2114	17.1286	0	0	79.34		78.4111	21.5889	0	0	100	0.0319144	0.268863	0.0928951	0.277267	0.173755	0.10928	0.068953		442.716	3712.06	42.1528	34.7918	179.801	310.721	203.429	163.135	226.257	226.7	201.676	290.901	127.04
															1.5	1395.05	21.3	62.192	17.048	0	0	79.24		78.4857	21.5143	0	0	100	0.0318318	0.268348	0.0926354	0.276557	0.173292	0.108978	0.0687565		427.264	3696.64	42.088	34.8261	178.089	310.098	203.277	163.323	225.498	226.695	200.157	290.475	125.246
															1.5	1395.49	21.4	62.1727	16.9673	0	0	79.14		78.5604	21.4396	0	0	100	0.031749	0.267833	0.0923752	0.275846	0.172827	0.108675	0.0685595		412.295	3681.29	42.0232	34.8597	176.387	309.473	203.124	163.509	224.738	226.685	198.644	290.046	123.47
															1.5	1395.92	21.5	62.1534	16.8866	0	0	79.04		78.6354	21.3646	0	0	100	0.031666	0.267316	0.0921142	0.275132	0.172362	0.108372	0.068362		397.796	3666.02	41.9582	34.8927	174.693	308.846	202.972	163.693	223.977	226.673	197.135	289.614	121.712
															1.5	1396.36	21.6	62.1341	16.8059	0	0	78.94		78.7105	21.2895	0	0	100	0.0315827	0.266798	0.0918526	0.274417	0.171895	0.108068	0.0681641		383.752	3650.82	41.8932	34.9251	173.01	308.217	202.818	163.874	223.216	226.657	195.632	289.179	119.972
															1.5	1396.79	21.7	62.1148	16.7252	0	0	78.84		78.7859	21.2141	0	0	100	0.0314993	0.266278	0.0915904	0.273699	0.171427	0.107763	0.0679656		370.152	3635.71	41.828	34.9569	171.335	307.586	202.665	164.053	222.455	226.637	194.134	288.741	118.25
															1.5	1397.23	21.8	62.0955	16.6445	0	0	78.74		78.8614	21.1386	0	0	100	0.0314156	0.265758	0.0913275	0.27298	0.170957	0.107457	0.0677666		356.984	3620.67	41.7627	34.9882	169.67	306.954	202.51	164.229	221.693	226.615	192.642	288.3	116.545
															1.5	1397.66	21.9	62.0761	16.5639	0	0	78.64		78.9371	21.0629	0	0	100	0.0313317	0.265236	0.0910639	0.27226	0.170487	0.10715	0.0675671		344.235	3605.7	41.6973	35.0188	168.015	306.319	202.355	164.403	220.931	226.589	191.155	287.856	114.858
															1.5	1398.1	22	62.0568	16.4832	0	0	78.54		79.013	20.987	0	0	100	0.0312477	0.264712	0.0907996	0.271537	0.170015	0.106843	0.0673671		331.893	3590.82	41.6318	35.0488	166.368	305.683	202.2	164.575	220.168	226.56	189.674	287.41	113.188
															1.5	1398.53	22.1	62.0375	16.4025	0	0	78.44		79.0891	20.9109	0	0	100	0.0311634	0.264187	0.0905347	0.270812	0.169542	0.106535	0.0671666		319.947	3576.02	41.5662	35.0783	164.731	305.045	202.044	164.745	219.405	226.527	188.198	286.961	111.536
															1.5	1398.97	22.2	62.0182	16.3218	0	0	78.34		79.1654	20.8346	0	0	100	0.0310788	0.263661	0.0902691	0.270086	0.169068	0.106226	0.0669655		308.386	3561.3	41.5005	35.1073	163.103	304.406	201.888	164.912	218.641	226.492	186.727	286.509	109.901
															1.5	1399.4	22.3	61.9989	16.2411	0	0	78.24		79.2419	20.7581	0	0	100	0.0309941	0.263134	0.0900028	0.269358	0.168593	0.105916	0.066764		297.199	3546.67	41.4347	35.1356	161.485	303.765	201.731	165.077	217.877	226.453	185.261	286.055	108.283
															1.5	1399.84	22.4	61.9795	16.1605	0	0	78.14		79.3186	20.6814	0	0	100	0.0309092	0.262605	0.0897358	0.268628	0.168116	0.105606	0.0665619		286.375	3532.11	41.3687	35.1635	159.876	303.123	201.574	165.24	217.113	226.411	183.801	285.599	106.682
															1.5	1400.27	22.5	61.9602	16.0798	0	0	78.04		79.3955	20.6045	0	0	100	0.030824	0.262075	0.0894682	0.267896	0.167639	0.105294	0.0663593		275.904	3517.64	41.3027	35.1908	158.276	302.479	201.416	165.401	216.347	226.367	182.347	285.14	105.097
															1.5	1400.7	22.6	61.9409	15.9991	0	0	77.94		79.4726	20.5274	0	0	100	0.0307386	0.261544	0.0891998	0.267162	0.16716	0.104982	0.0661563		265.775	3503.25	41.2365	35.2175	156.685	301.834	201.258	165.559	215.582	226.319	180.897	284.679	103.53
															1.5	1401.14	22.7	61.9216	15.9184	0	0	77.84		79.5498	20.4502	0	0	100	0.030653	0.261011	0.0889308	0.266426	0.166679	0.104669	0.0659526		255.98	3488.95	41.1702	35.2437	155.104	301.188	201.099	165.716	214.816	226.268	179.453	284.215	101.979
															1.5	1401.57	22.8	61.9023	15.8377	0	0	77.74		79.6273	20.3727	0	0	100	0.0305672	0.260476	0.0886611	0.265688	0.166198	0.104356	0.0657485		246.507	3474.72	41.1038	35.2694	153.531	300.54	200.94	165.87	214.049	226.215	178.015	283.749	100.445
															1.5	1402.01	22.9	61.883	15.757	0	0	77.64		79.705	20.295	0	0	100	0.0304811	0.259941	0.0883906	0.264949	0.165715	0.104041	0.0655438		237.348	3460.59	41.0373	35.2946	151.968	299.891	200.78	166.023	213.282	226.158	176.582	283.281	98.9272
															1.5	1402.44	23	61.8636	15.6764	0	0	77.54		79.7829	20.2171	0	0	100	0.0303949	0.259404	0.0881195	0.264208	0.165231	0.103726	0.0653386		228.494	3446.53	40.9706	35.3193	150.414	299.241	200.619	166.173	212.515	226.099	175.154	282.811	97.4258
															1.5	1402.88	23.1	61.8443	15.5957	0	0	77.44		79.8609	20.1391	0	0	100	0.0303084	0.258865	0.0878477	0.263464	0.164746	0.10341	0.0651329		219.935	3432.57	40.9039	35.3435	148.87	298.59	200.458	166.322	211.747	226.037	173.732	282.339	95.9407
															1.5	1403.31	23.2	61.825	15.515	0	0	77.34		79.9392	20.0608	0	0	100	0.0302217	0.258326	0.0875752	0.262719	0.16426	0.103093	0.0649267		211.664	3418.68	40.837	35.3671	147.334	297.938	200.297	166.468	210.979	225.972	172.315	281.865	94.4717
															1.5	1403.75	23.3	61.8057	15.4343	0	0	77.24		80.0177	19.9823	0	0	100	0.0301347	0.257784	0.087302	0.261972	0.163772	0.102775	0.0647199		203.671	3404.89	40.77	35.3903	145.808	297.285	200.135	166.613	210.21	225.904	170.904	281.389	93.0188
															1.5	1404.18	23.4	61.7864	15.3536	0	0	77.14		80.0964	19.9036	0	0	100	0.0300476	0.257242	0.087028	0.261223	0.163283	0.102456	0.0645125		195.948	3391.17	40.7029	35.413	144.29	296.632	199.972	166.755	209.44	225.834	169.497	280.91	91.5818
															1.5	1404.62	23.5	61.767	15.273	0	0	77.04		80.1753	19.8247	0	0	100	0.0299602	0.256698	0.0867534	0.260471	0.162793	0.102137	0.0643047		188.487	3377.54	40.6357	35.4353	142.782	295.977	199.809	166.896	208.67	225.761	168.097	280.43	90.1607
															1.5	1405.05	23.6	61.7477	15.1923	0	0	76.94		80.2544	19.7456	0	0	100	0.0298726	0.256152	0.086478	0.259718	0.162301	0.101816	0.0640963		181.28	3364	40.5683	35.457	141.283	295.321	199.645	167.035	207.9	225.685	166.702	279.949	88.7553
															1.5	1405.49	23.7	61.7284	15.1116	0	0	76.84		80.3337	19.6663	0	0	100	0.0297847	0.255606	0.0862019	0.258963	0.161808	0.101495	0.0638873		174.32	3350.54	40.5008	35.4783	139.793	294.665	199.481	167.172	207.129	225.607	165.312	279.465	87.3655
															1.5	1405.92	23.8	61.7091	15.0309	0	0	76.74		80.4132	19.5868	0	0	100	0.0296966	0.255057	0.0859251	0.258206	0.161314	0.101173	0.0636778		167.6	3337.17	40.4332	35.4991	138.312	294.008	199.316	167.307	206.358	225.526	163.927	278.979	85.9912
															1.5	1406.36	23.9	61.6898	14.9502	0	0	76.64		80.4929	19.5071	0	0	100	0.0296083	0.254508	0.0856476	0.257448	0.160819	0.100851	0.0634678		161.111	3323.88	40.3655	35.5195	136.841	293.351	199.15	167.44	205.586	225.443	162.548	278.492	84.6324
															1.5	1406.79	24	61.6705	14.8695	0	0	76.54		80.5728	19.4272	0	0	100	0.0295198	0.253957	0.0853694	0.256687	0.160322	0.100527	0.0632572		154.847	3310.67	40.2977	35.5394	135.378	292.692	198.984	167.571	204.814	225.357	161.175	278.003	83.2889
															1.5	1407.23	24.1	61.6511	14.7889	0	0	76.44		80.653	19.347	0	0	100	0.029431	0.253404	0.0850904	0.255924	0.159824	0.100202	0.0630461		148.801	3297.55	40.2297	35.5588	133.924	292.034	198.818	167.701	204.041	225.268	159.807	277.513	81.9606
															1.5	1407.94	24.2	61.6318	14.7082	0	0	76.34		80.7333	19.2667	0	0	100	0.029342	0.25285	0.0848107	0.255159	0.159325	0.0998771	0.0628344		142.967	3284.52	40.1616	35.5779	132.479	291.374	198.651	167.829	203.267	225.177	158.444	277.021	80.6475
															1.5	1408.66	24.3	61.6125	14.6275	0	0	76.24		80.8139	19.1861	0	0	100	0.0292528	0.252295	0.0845303	0.254392	0.158825	0.0995509	0.0626221		137.337	3271.57	40.0934	35.5964	131.044	290.715	198.483	167.955	202.494	225.084	157.087	276.527	79.3493
															1.5	1409.37	24.4	61.5932	14.5468	0	0	76.14		80.8946	19.1054	0	0	100	0.0291633	0.251738	0.0842491	0.253623	0.158323	0.0992239	0.0624093		131.906	3258.7	40.025	35.6146	129.617	290.054	198.314	168.079	201.719	224.988	155.735	276.032	78.0661
															1.5	1410.08	24.5	61.5739	14.4661	0	0	76.04		80.9756	19.0244	0	0	100	0.0290736	0.251179	0.0839672	0.252852	0.157819	0.098896	0.0621959		126.667	3245.92	39.9566	35.6323	128.199	289.394	198.145	168.202	200.944	224.89	154.389	275.536	76.7976
															1.5	1410.8	24.6	61.5545	14.3855	0	0	75.94		81.0568	18.9432	0	0	100	0.0289837	0.25062	0.0836845	0.252079	0.157315	0.0985673	0.061982		121.614	3233.22	39.888	35.6496	126.79	288.733	197.976	168.323	200.169	224.789	153.048	275.038	75.5439
															1.5	1411.51	24.7	61.5352	14.3048	0	0	75.84		81.1382	18.8618	0	0	100	0.0288935	0.250058	0.0834011	0.251304	0.156809	0.0982376	0.0617675		116.742	3220.6	39.8193	35.6665	125.39	288.071	197.806	168.442	199.393	224.687	151.713	274.539	74.3048
															1.5	1412.23	24.8	61.5159	14.2241	0	0	75.74		81.2198	18.7802	0	0	100	0.0288031	0.249495	0.083117	0.250527	0.156302	0.0979071	0.0615525		112.045	3208.06	39.7504	35.683	123.999	287.41	197.635	168.56	198.616	224.582	150.383	274.038	73.0802
															1.5	1412.94	24.9	61.4966	14.1434	0	0	75.64		81.3017	18.6983	0	0	100	0.0287125	0.248931	0.0828321	0.249748	0.155793	0.0975758	0.0613368		107.517	3195.61	39.6814	35.699	122.617	286.748	197.463	168.676	197.839	224.474	149.058	273.536	71.87
															1.5	1413.66	25	61.4773	14.0627	0	0	75.54		81.3837	18.6163	0	0	100	0.0286216	0.248365	0.0825464	0.248967	0.155283	0.0972435	0.0611207		103.152	3183.24	39.6123	35.7147	121.244	286.086	197.291	168.791	197.062	224.365	147.739	273.033	70.6741
															1.5	1414.37	25.1	61.458	13.982	0	0	75.44		81.466	18.534	0	0	100	0.0285304	0.247798	0.08226	0.248183	0.154772	0.0969104	0.0609039		98.9468	3170.95	39.5431	35.7299	119.88	285.424	197.119	168.904	196.284	224.253	146.425	272.528	69.4924
															1.5	1415.08	25.2	61.4386	13.9014	0	0	75.34		81.5485	18.4515	0	0	100	0.0284391	0.247229	0.0819729	0.247398	0.15426	0.0965764	0.0606865		94.8947	3158.75	39.4737	35.7448	118.525	284.761	196.945	169.015	195.505	224.139	145.117	272.023	68.3248
															1.5	1415.8	25.3	61.4193	13.8207	0	0	75.24		81.6312	18.3688	0	0	100	0.0283474	0.246659	0.0816849	0.246611	0.153746	0.0962415	0.0604686		90.9911	3146.62	39.4042	35.7593	117.178	284.099	196.771	169.125	194.726	224.022	143.815	271.516	67.1712
															1.5	1416.51	25.4	61.4	13.74	0	0	75.14		81.7141	18.2859	0	0	100	0.0282556	0.246087	0.0813962	0.245821	0.15323	0.0959057	0.0602501		87.2314	3134.58	39.3346	35.7733	115.84	283.437	196.597	169.233	193.946	223.904	142.518	271.008	66.0315
															1.5	1417.23	25.5	61.3807	13.6593	0	0	75.04		81.7973	18.2027	0	0	100	0.0281635	0.245514	0.0811068	0.245029	0.152714	0.095569	0.060031		83.6108	3122.61	39.2648	35.787	114.512	282.774	196.421	169.339	193.166	223.783	141.226	270.499	64.9057
															1.5	1417.94	25.6	61.3614	13.5786	0	0	74.94		81.8807	18.1193	0	0	100	0.0280711	0.244939	0.0808165	0.244236	0.152196	0.0952314	0.0598114		80.1247	3110.73	39.1949	35.8003	113.191	282.112	196.245	169.444	192.385	223.661	139.94	269.989	63.7935
															1.5	1418.66	25.7	61.342	13.498	0	0	74.84		81.9643	18.0357	0	0	100	0.0279785	0.244362	0.0805255	0.24344	0.151676	0.0948929	0.0595911		76.7688	3098.92	39.1249	35.8133	111.88	281.449	196.069	169.548	191.604	223.536	138.659	269.478	62.6949
															1.5	1419.37	25.8	61.3227	13.4173	0	0	74.74		82.0481	17.9519	0	0	100	0.0278857	0.243784	0.0802337	0.242642	0.151155	0.0945535	0.0593703		73.5388	3087.2	39.0547	35.8258	110.578	280.787	195.892	169.65	190.822	223.409	137.384	268.966	61.6099
															1.5	1420.08	25.9	61.3034	13.3366	0	0	74.64		82.1321	17.8679	0	0	100	0.0277926	0.243205	0.0799411	0.241842	0.150633	0.0942132	0.0591488		70.4305	3075.55	38.9844	35.838	109.284	280.125	195.714	169.751	190.04	223.28	136.114	268.453	60.5382
															1.5	1420.8	26	61.2841	13.2559	0	0	74.54		82.2164	17.7836	0	0	100	0.0276992	0.242624	0.0796478	0.24104	0.150109	0.093872	0.0589268		67.4399	3063.98	38.9139	35.8499	107.999	279.463	195.535	169.85	189.257	223.149	134.85	267.939	59.4799
															1.5	1421.51	26.1	61.2648	13.1752	0	0	74.44		82.3009	17.6991	0	0	100	0.0276056	0.242041	0.0793536	0.240235	0.149584	0.0935299	0.0587042		64.563	3052.49	38.8433	35.8613	106.723	278.801	195.356	169.948	188.473	223.017	133.591	267.425	58.4347
															1.5	1422.23	26.2	61.2455	13.0945	0	0	74.34		82.3856	17.6144	0	0	100	0.0275118	0.241457	0.0790587	0.239428	0.149058	0.0931868	0.0584809		61.796	3041.07	38.7726	35.8724	105.455	278.139	195.176	170.044	187.689	222.882	132.338	266.909	57.4027
															1.5	1422.94	26.3	61.2261	13.0139	0	0	74.24		82.4706	17.5294	0	0	100	0.0274177	0.240871	0.0787629	0.23862	0.14853	0.0928428	0.0582571		59.1352	3029.73	38.7017	35.8832	104.196	277.478	194.995	170.139	186.904	222.745	131.09	266.393	56.3837
															1.5	1423.66	26.4	61.2068	12.9332	0	0	74.14		82.5557	17.4443	0	0	100	0.0273233	0.240284	0.0784664	0.237809	0.148001	0.0924979	0.0580327		56.5771	3018.47	38.6307	35.8936	102.946	276.817	194.814	170.232	186.119	222.606	129.848	265.875	55.3776
															1.5	1424.37	26.5	61.1875	12.8525	0	0	74.04		82.6411	17.3589	0	0	100	0.0272287	0.239695	0.078169	0.236996	0.14747	0.0921521	0.0578076		54.118	3007.29	38.5596	35.9037	101.705	276.156	194.632	170.324	185.333	222.466	128.611	265.358	54.3843
															1.5	1425.08	26.6	61.1682	12.7718	0	0	73.94		82.7268	17.2732	0	0	100	0.0271339	0.239105	0.0778709	0.23618	0.146938	0.0918053	0.057582		51.7547	2996.18	38.4883	35.9134	100.472	275.496	194.449	170.415	184.547	222.323	127.38	264.839	53.4038
															1.5	1425.8	26.7	61.1489	12.6911	0	0	73.84		82.8127	17.1873	0	0	100	0.0270387	0.238512	0.077572	0.235363	0.146404	0.0914576	0.0573557		49.4839	2985.14	38.4169	35.9228	99.2478	274.836	194.265	170.504	183.76	222.179	126.155	264.319	52.4359
															1.5	1426.51	26.8	61.1295	12.6105	0	0	73.74		82.8988	17.1012	0	0	100	0.0269433	0.237919	0.0772722	0.234543	0.145869	0.0911089	0.0571288		47.3023	2974.18	38.3453	35.9318	98.0322	274.176	194.081	170.592	182.972	222.032	124.935	263.799	51.4805
															1.5	1427.23	26.9	61.1102	12.5298	0	0	73.64		82.9851	17.0149	0	0	100	0.0268477	0.237323	0.0769716	0.233721	0.145333	0.0907593	0.0569014		45.2068	2963.29	38.2736	35.9405	96.8253	273.517	193.896	170.679	182.184	221.884	123.72	263.279	50.5375
															1.5	1427.94	27	61.0909	12.4491	0	0	73.54		83.0717	16.9283	0	0	100	0.0267518	0.236726	0.0766702	0.232897	0.144795	0.0904088	0.0566732		43.1945	2952.47	38.2017	35.9489	95.6269	272.858	193.71	170.764	181.395	221.734	122.511	262.757	49.6069
															1.5	1428.66	27.1	61.0716	12.3684	0	0	73.44		83.1585	16.8415	0	0	100	0.0266556	0.236128	0.076368	0.23207	0.144255	0.0900573	0.0564445		41.2625	2941.73	38.1297	35.9569	94.4371	272.199	193.524	170.848	180.606	221.582	121.308	262.235	48.6885
															1.5	1429.37	27.2	61.0523	12.2877	0	0	73.34		83.2455	16.7545	0	0	100	0.0265592	0.235528	0.076065	0.231242	0.143714	0.0897048	0.0562152		39.4079	2931.06	38.0575	35.9646	93.2559	271.541	193.337	170.931	179.816	221.429	120.11	261.713	47.7823
															1.5	1430.08	27.3	61.033	12.207	0	0	73.24		83.3328	16.6672	0	0	100	0.0264625	0.234926	0.0757611	0.230411	0.143172	0.0893514	0.0559852		37.6279	2920.46	37.9852	35.972	92.0832	270.884	193.149	171.012	179.025	221.274	118.917	261.19	46.8881
															1.5	1430.8	27.4	61.0136	12.1264	0	0	73.14		83.4203	16.5797	0	0	100	0.0263656	0.234322	0.0754564	0.229577	0.142628	0.088997	0.0557546		35.92	2909.93	37.9128	35.9791	90.9191	270.227	192.96	171.092	178.234	221.116	117.73	260.666	46.0059
															1.5	1431.51	27.5	60.9943	12.0457	0	0	73.04		83.5081	16.4919	0	0	100	0.0262684	0.233717	0.0751509	0.228742	0.142083	0.0886416	0.0555233		34.2815	2899.48	37.8402	35.9859	89.7634	269.571	192.77	171.171	177.443	220.958	116.549	260.142	45.1355
															1.5	1432.23	27.6	60.975	11.965	0	0	72.94		83.5961	16.4039	0	0	100	0.0261709	0.23311	0.0748445	0.227904	0.141536	0.0882853	0.0552915		32.71	2889.09	37.7674	35.9924	88.6163	268.915	192.58	171.249	176.65	220.797	115.373	259.617	44.2769
															1.5	1432.94	27.7	60.9557	11.8843	0	0	72.84		83.6844	16.3156	0	0	100	0.0260731	0.232502	0.0745373	0.227064	0.140987	0.0879279	0.055059		31.203	2878.77	37.6945	35.9985	87.4776	268.26	192.389	171.325	175.857	220.635	114.203	259.093	43.4299
															1.5	1433.66	27.8	60.9364	11.8036	0	0	72.74		83.7728	16.2272	0	0	100	0.0259751	0.231892	0.0742293	0.226221	0.140438	0.0875696	0.0548258		29.7583	2868.52	37.6214	36.0043	86.3474	267.606	192.197	171.4	175.064	220.471	113.039	258.567	42.5946
															1.5	1434.37	27.9	60.917	11.723	0	0	72.64		83.8616	16.1384	0	0	100	0.0258768	0.23128	0.0739204	0.225377	0.139886	0.0872104	0.054592		28.3735	2858.35	37.5482	36.0099	85.2256	266.952	192.004	171.474	174.27	220.305	111.88	258.041	41.7707
															1.5	1435.08	28	60.8977	11.6423	0	0	72.54		83.9505	16.0495	0	0	100	0.0257783	0.230666	0.0736106	0.22453	0.139333	0.0868501	0.0543576		27.0464	2848.23	37.4749	36.0151	84.1123	266.299	191.811	171.547	173.475	220.138	110.726	257.515	40.9582
															1.5	1435.8	28.1	60.8784	11.5616	0	0	72.44		84.0398	15.9602	0	0	100	0.0256794	0.230051	0.0733	0.22368	0.138779	0.0864888	0.0541225		25.7749	2838.19	37.4013	36.02	83.0073	265.647	191.617	171.618	172.679	219.969	109.578	256.989	40.157
															1.5	1436.51	28.2	60.8591	11.4809	0	0	72.34		84.1292	15.8708	0	0	100	0.0255803	0.229434	0.0729885	0.222828	0.138223	0.0861265	0.0538868		24.557	2828.21	37.3277	36.0247	81.9108	264.996	191.422	171.688	171.883	219.799	108.436	256.462	39.3669
															1.5	1437.23	28.3	60.8398	11.4002	0	0	72.24		84.219	15.781	0	0	100	0.0254809	0.228816	0.0726762	0.221974	0.137665	0.0857633	0.0536504		23.3907	2818.3	37.2538	36.029	80.8226	264.345	191.226	171.757	171.086	219.627	107.299	255.935	38.588
															1.5	1437.94	28.4	60.8205	11.3195	0	0	72.14		84.3089	15.6911	0	0	100	0.0253813	0.228195	0.072363	0.221118	0.137106	0.085399	0.0534133		22.274	2808.46	37.1798	36.0331	79.7429	263.695	191.029	171.825	170.289	219.453	106.168	255.408	37.8201
															1.5	1438.66	28.5	60.8011	11.2389	0	0	72.04		84.3991	15.6009	0	0	100	0.0252814	0.227573	0.072049	0.220259	0.136546	0.0850337	0.0531756		21.2051	2798.68	37.1057	36.0368	78.6714	263.046	190.831	171.892	169.491	219.278	105.043	254.88	37.0632
															1.5	1439.37	28.6	60.7818	11.1582	0	0	71.94		84.4896	15.5104	0	0	100	0.0251811	0.226949	0.071734	0.219398	0.135984	0.0846674	0.0529373		20.1822	2788.96	37.0314	36.0403	77.6083	262.397	190.633	171.957	168.692	219.101	103.923	254.352	36.317
															1.5	1440.08	28.7	60.7625	11.0775	0	0	71.84		84.5803	15.4197	0	0	100	0.0250807	0.226324	0.0714182	0.218534	0.13542	0.0843	0.0526982		19.2035	2779.31	36.9569	36.0435	76.5535	261.75	190.433	172.022	167.893	218.922	102.808	253.824	35.5816
															1.5	1440.8	28.8	60.7432	10.9968	0	0	71.74		84.6713	15.3287	0	0	100	0.0249799	0.225697	0.0711015	0.217668	0.134855	0.0839317	0.0524586		18.2673	2769.72	36.8823	36.0464	75.507	261.103	190.233	172.085	167.093	218.742	101.7	253.296	34.8569
															1.5	1441.51	28.9	60.7239	10.9161	0	0	71.64		84.7625	15.2375	0	0	100	0.0248788	0.225068	0.0707839	0.216799	0.134288	0.0835623	0.0522182		17.372	2760.2	36.8075	36.049	74.4687	260.457	190.032	172.147	166.293	218.561	100.597	252.768	34.1426
															1.5	1442.23	29	60.7045	10.8355	0	0	71.54		84.854	15.146	0	0	100	0.0247775	0.224437	0.0704655	0.215928	0.133719	0.0831919	0.0519772		16.5161	2750.74	36.7325	36.0514	73.4388	259.812	189.83	172.208	165.491	218.378	99.4991	252.239	33.4389
															1.5	1442.94	29.1	60.6852	10.7548	0	0	71.44		84.9457	15.0543	0	0	100	0.0246759	0.223804	0.0701461	0.215055	0.133149	0.0828204	0.0517355		15.6979	2741.34	36.6574	36.0535	72.417	259.168	189.627	172.268	164.689	218.193	98.4072	251.71	32.7455
															1.5	1443.66	29.2	60.6659	10.6741	0	0	71.34		85.0377	14.9623	0	0	100	0.024574	0.22317	0.0698259	0.214179	0.132578	0.0824479	0.0514931		14.9161	2732	36.5821	36.0553	71.4035	258.525	189.423	172.327	163.887	218.007	97.321	251.182	32.0624
															1.5	1444.37	29.3	60.6466	10.5934	0	0	71.24		85.13	14.87	0	0	100	0.0244718	0.222534	0.0695047	0.213301	0.132004	0.0820744	0.05125		14.1692	2722.73	36.5066	36.0568	70.3982	257.883	189.218	172.384	163.083	217.82	96.2403	250.653	31.3895
															1.5	1445.08	29.4	60.6273	10.5127	0	0	71.14		85.2225	14.7775	0	0	100	0.0243693	0.221896	0.0691827	0.21242	0.131429	0.0816998	0.0510063		13.4558	2713.51	36.431	36.0581	69.4011	257.242	189.013	172.441	162.28	217.631	95.1654	250.124	30.7266
															1.5	1445.8	29.5	60.608	10.432	0	0	71.04		85.3153	14.6847	0	0	100	0.0242666	0.221256	0.0688597	0.211537	0.130853	0.0813242	0.0507618		12.7746	2704.36	36.3552	36.0591	68.4122	256.602	188.806	172.496	161.475	217.441	94.096	249.595	30.0738
															1.5	1446.51	29.6	60.5886	10.3514	0	0	70.94		85.4083	14.5917	0	0	100	0.0241635	0.220615	0.0685358	0.210651	0.130275	0.0809475	0.0505167		12.1243	2695.26	36.2792	36.0599	67.4314	255.963	188.598	172.551	160.67	217.249	93.0323	249.066	29.4309
															1.5	1447.23	29.7	60.5693	10.2707	0	0	70.84		85.5016	14.4984	0	0	100	0.0240602	0.219971	0.068211	0.209763	0.129695	0.0805697	0.0502709		11.5037	2686.22	36.2031	36.0603	66.4588	255.325	188.39	172.604	159.863	217.056	91.9742	248.537	28.7979
															1.5	1447.94	29.8	60.55	10.19	0	0	70.74		85.5951	14.4049	0	0	100	0.0239565	0.219326	0.0678853	0.208872	0.129114	0.0801909	0.0500244		10.9116	2677.25	36.1267	36.0606	65.4943	254.688	188.18	172.656	159.057	216.861	90.9218	248.008	28.1745
															1.5	1448.66	29.9	60.5307	10.1093	0	0	70.64		85.689	14.311	0	0	100	0.0238526	0.218679	0.0675587	0.207979	0.128531	0.079811	0.0497772		10.3468	2668.33	36.0503	36.0605	64.5379	254.052	187.97	172.708	158.249	216.665	89.8751	247.479	27.5608
															1.5	1449.37	30	60.5114	10.0286	0	0	70.54		85.7831	14.2169	0	0	100	0.0237484	0.218031	0.0672311	0.207083	0.127946	0.07943	0.0495293		9.80824	2659.47	35.9736	36.0602	63.5896	253.417	187.758	172.758	157.441	216.468	88.834	246.951	26.9567
															1.5	1450.08	30.1	60.492	9.94795	0	0	70.44		85.8774	14.1226	0	0	100	0.0236438	0.21738	0.0669027	0.206185	0.12736	0.0790479	0.0492807		9.29479	2650.66	35.8967	36.0597	62.6493	252.783	187.546	172.807	156.632	216.269	87.7986	246.422	26.362
															1.5	1450.8	30.2	60.4727	9.86727	0	0	70.34		85.972	14.028	0	0	100	0.023539	0.216727	0.0665732	0.205284	0.126772	0.0786648	0.0490313		8.80544	2641.91	35.8197	36.0589	61.7171	252.151	187.333	172.855	155.823	216.069	86.7688	245.893	25.7768
															1.5	1451.51	30.3	60.4534	9.78659	0	0	70.24		86.0669	13.9331	0	0	100	0.0234339	0.216073	0.0662429	0.204381	0.126182	0.0782805	0.0487813		8.3392	2633.22	35.7425	36.0579	60.7929	251.519	187.118	172.902	155.012	215.867	85.7447	245.365	25.2008
															1.5	1452.23	30.4	60.4341	9.70591	0	0	70.14		86.1621	13.8379	0	0	100	0.0233285	0.215417	0.0659116	0.203475	0.125591	0.0778952	0.0485306		7.89509	2624.59	35.6651	36.0566	59.8768	250.889	186.903	172.948	154.201	215.664	84.7263	244.836	24.634
															1.5	1452.94	30.5	60.4148	9.62523	0	0	70.04		86.2575	13.7425	0	0	100	0.0232228	0.214759	0.0655794	0.202566	0.124998	0.0775087	0.0482791		7.47219	2616.01	35.5876	36.055	58.9686	250.259	186.686	172.993	153.39	215.46	83.7136	244.308	24.0763
															1.5	1453.66	30.6	60.3955	9.54455	0	0	69.94		86.3532	13.6468	0	0	100	0.0231168	0.214099	0.0652462	0.201655	0.124403	0.0771212	0.0480269		7.0696	2607.48	35.5098	36.0532	58.0684	249.631	186.468	173.037	152.577	215.255	82.7065	243.78	23.5277
															1.5	1454.37	30.7	60.3761	9.46386	0	0	69.84		86.4492	13.5508	0	0	100	0.0230104	0.213437	0.064912	0.200741	0.123807	0.0767326	0.047774		6.68647	2599.01	35.4319	36.0512	57.1762	249.004	186.25	173.08	151.764	215.048	81.7052	243.252	22.988
															1.5	1455.08	30.8	60.3568	9.38318	0	0	69.74		86.5455	13.4545	0	0	100	0.0229038	0.212773	0.0645769	0.199825	0.123208	0.0763428	0.0475204		6.32195	2590.59	35.3538	36.049	56.2919	248.379	186.03	173.122	150.95	214.84	80.7095	242.724	22.4572
															1.5	1455.8	30.9	60.3375	9.3025	0	0	69.64		86.642	13.358	0	0	100	0.0227969	0.212108	0.0642408	0.198906	0.122608	0.0759519	0.0472661		5.97526	2582.23	35.2755	36.0465	55.4155	247.754	185.809	173.163	150.135	214.63	79.7195	242.197	21.9351
															1.5	1456.51	31	60.3182	9.22182	0	0	69.54		86.7388	13.2612	0	0	100	0.0226896	0.21144	0.0639038	0.197984	0.122007	0.0755599	0.047011		5.64563	2573.91	35.197	36.0437	54.5471	247.131	185.587	173.203	149.32	214.42	78.7353	241.669	21.4218
															1.5	1457.23	31.1	60.2989	9.14114	0	0	69.44		86.8359	13.1641	0	0	100	0.0225821	0.210771	0.0635658	0.19706	0.121404	0.0751667	0.0467552		5.3323	2565.65	35.1184	36.0407	53.6865	246.509	185.364	173.243	148.503	214.208	77.7568	241.142	20.917
															1.5	1457.94	31.2	60.2795	9.06045	0	0	69.34		86.9333	13.0667	0	0	100	0.0224742	0.210099	0.0632268	0.196133	0.120798	0.0747725	0.0464986		5.03457	2557.45	35.0395	36.0375	52.8338	245.888	185.14	173.281	147.686	213.994	76.7839	240.616	20.4207
															1.5	1458.66	31.3	60.2602	8.97977	0	0	69.24		87.0309	12.9691	0	0	100	0.0223661	0.209426	0.0628869	0.195203	0.120192	0.0743771	0.0462413		4.75175	2549.29	34.9604	36.0341	51.9889	245.269	184.915	173.318	146.869	213.78	75.8168	240.089	19.9329
															1.5	1459.37	31.4	60.2409	8.89909	0	0	69.14		87.1289	12.8711	0	0	100	0.0222576	0.208751	0.0625459	0.194271	0.119583	0.0739805	0.0459833		4.48318	2541.19	34.8812	36.0304	51.1519	244.651	184.689	173.354	146.05	213.564	74.8555	239.563	19.4534
															1.5	1460.08	31.5	60.2216	8.81841	0	0	69.04		87.2271	12.7729	0	0	100	0.0221488	0.208073	0.062204	0.193336	0.118973	0.0735828	0.0457245		4.22823	2533.13	34.8017	36.0265	50.3227	244.034	184.461	173.389	145.231	213.347	73.8998	239.037	18.9821
															1.5	1460.8	31.6	60.2023	8.73773	0	0	68.94		87.3256	12.6744	0	0	100	0.0220397	0.207394	0.0618611	0.192398	0.118361	0.0731839	0.0454649		3.98629	2525.13	34.7221	36.0224	49.5012	243.418	184.232	173.424	144.411	213.129	72.9499	238.511	18.519
															1.5	1461.51	31.7	60.183	8.65705	0	0	68.84		87.4244	12.5756	0	0	100	0.0219302	0.206713	0.0615171	0.191457	0.117747	0.0727839	0.0452046		3.75677	2517.18	34.6423	36.018	48.6876	242.804	184.002	173.457	143.59	212.91	72.0057	237.986	18.064
															1.5	1462.23	31.8	60.1636	8.57636	0	0	68.74		87.5235	12.4765	0	0	100	0.0218205	0.20603	0.0611722	0.190514	0.117131	0.0723827	0.0449436		3.5391	2509.27	34.5622	36.0135	47.8817	242.191	183.771	173.489	142.768	212.689	71.0673	237.461	17.617
															1.5	1462.94	31.9	60.1443	8.49568	0	0	68.64		87.6228	12.3772	0	0	100	0.0217104	0.205345	0.0608263	0.189568	0.116514	0.0719804	0.0446818		3.33275	2501.42	34.482	36.0087	47.0835	241.579	183.539	173.521	141.945	212.467	70.1346	236.937	17.178
															1.5	1463.66	32	60.125	8.415	0	0	68.54		87.7225	12.2775	0	0	100	0.0216	0.204657	0.0604794	0.188619	0.115894	0.0715769	0.0444192		3.1372	2493.61	34.4016	36.0036	46.293	240.969	183.305	173.552	141.122	212.245	69.2077	236.413	16.7467
															1.5	1464.37	32.1	60.1057	8.33432	0	0	68.44		87.8224	12.1776	0	0	100	0.0214893	0.203968	0.0601314	0.187668	0.115273	0.0711722	0.0441558		2.95194	2485.85	34.3209	35.9984	45.5102	240.36	183.071	173.581	140.298	212.02	68.2866	235.889	16.3232
															1.5	1465.08	32.2	60.0864	8.25364	0	0	68.34		87.9227	12.0773	0	0	100	0.0213783	0.203277	0.0597825	0.186713	0.11465	0.0707663	0.0438917		2.77649	2478.14	34.2401	35.9929	44.7351	239.752	182.835	173.61	139.473	211.795	67.3712	235.365	15.9074
															1.5	1465.8	32.3	60.067	8.17295	0	0	68.24		88.0232	11.9768	0	0	100	0.0212669	0.202584	0.0594325	0.185756	0.114026	0.0703592	0.0436268		2.61041	2470.47	34.159	35.9873	43.9677	239.146	182.597	173.638	138.647	211.569	66.4616	234.842	15.4992
															1.5	1466.51	32.4	60.0477	8.09227	0	0	68.14		88.124	11.876	0	0	100	0.0211552	0.201889	0.0590814	0.184796	0.113399	0.0699509	0.0433612		2.45324	2462.86	34.0778	35.9814	43.2078	238.542	182.359	173.665	137.82	211.341	65.5577	234.32	15.0984
															1.5	1467.23	32.5	60.0284	8.01159	0	0	68.04		88.2252	11.7748	0	0	100	0.0210432	0.201191	0.0587294	0.183833	0.112771	0.0695414	0.0430947		2.30456	2455.29	33.9963	35.9753	42.4556	237.938	182.119	173.691	136.993	211.112	64.6597	233.798	14.7051
															1.5	1467.94	32.6	60.0091	7.93091	0	0	67.94		88.3266	11.6734	0	0	100	0.0209308	0.200492	0.0583763	0.182868	0.11214	0.0691308	0.0428275		2.16397	2447.76	33.9146	35.9689	41.711	237.336	181.878	173.716	136.164	210.882	63.7674	233.276	14.3191
															1.5	1468.66	32.7	59.9898	7.85023	0	0	67.84		88.4283	11.5717	0	0	100	0.0208182	0.199791	0.0580222	0.181899	0.111508	0.0687189	0.0425595		2.03108	2440.28	33.8328	35.9624	40.974	236.736	181.635	173.74	135.335	210.651	62.8809	232.755	13.9404
															1.5	1469.37	32.8	59.9705	7.76955	0	0	67.74		88.5303	11.4697	0	0	100	0.0207051	0.199087	0.057667	0.180928	0.110874	0.0683058	0.0422907		1.90551	2432.85	33.7507	35.9557	40.2445	236.137	181.391	173.763	134.505	210.419	62.0003	232.235	13.5689
															1.5	1470.08	32.9	59.9511	7.68886	0	0	67.64		88.6327	11.3673	0	0	100	0.0205918	0.198382	0.0573108	0.179954	0.110239	0.0678914	0.0420211		1.78691	2425.46	33.6683	35.9487	39.5226	235.539	181.146	173.786	133.674	210.186	61.1254	231.715	13.2044
															1.5	1470.8	33	59.9318	7.60818	0	0	67.54		88.7353	11.2647	0	0	100	0.0204781	0.197674	0.0569535	0.178977	0.109601	0.0674759	0.0417507		1.67494	2418.11	33.5858	35.9415	38.8081	234.943	180.899	173.807	132.842	209.951	60.2563	231.195	12.847
															1.5	1471.51	33.1	59.9125	7.5275	0	0	67.44		88.8382	11.1618	0	0	100	0.0203641	0.196964	0.0565952	0.177997	0.108961	0.0670591	0.0414794		1.56926	2410.81	33.5031	35.9342	38.1012	234.348	180.651	173.828	132.009	209.716	59.3931	230.676	12.4965
															1.5	1472.23	33.2	59.8932	7.44682	0	0	67.34		88.9415	11.0585	0	0	100	0.0202497	0.196252	0.0562358	0.177014	0.10832	0.0666411	0.0412074		1.46958	2403.56	33.4201	35.9266	37.4017	233.755	180.402	173.848	131.176	209.479	58.5357	230.158	12.1528
															1.5	1472.94	33.3	59.8739	7.36614	0	0	67.24		89.045	10.955	0	0	100	0.020135	0.195538	0.0558753	0.176028	0.107676	0.0662218	0.0409346		1.37557	2396.34	33.3369	35.9188	36.7097	233.163	180.151	173.867	130.341	209.242	57.6841	229.64	11.8159
															1.5	1473.66	33.4	59.8545	7.28545	0	0	67.14		89.1489	10.8511	0	0	100	0.02002	0.194822	0.0555138	0.17504	0.107031	0.0658013	0.040661		1.28697	2389.17	33.2535	35.9108	36.0251	232.573	179.898	173.885	129.505	209.003	56.8383	229.122	11.4857
															1.5	1474.37	33.5	59.8352	7.20477	0	0	67.04		89.253	10.747	0	0	100	0.0199046	0.194104	0.0551512	0.174048	0.106384	0.0653795	0.0403865		1.20349	2382.04	33.1698	35.9027	35.3479	231.984	179.644	173.902	128.669	208.763	55.9984	228.605	11.1621
															1.5	1475.08	33.6	59.8159	7.12409	0	0	66.94		89.3575	10.6425	0	0	100	0.0197889	0.193384	0.0547875	0.173053	0.105734	0.0649565	0.0401113		1.12487	2374.96	33.086	35.8943	34.6781	231.397	179.389	173.918	127.832	208.522	55.1643	228.089	10.8451
															1.5	1475.8	33.7	59.7966	7.04341	0	0	66.84		89.4623	10.5377	0	0	100	0.0196728	0.192661	0.0544227	0.172056	0.105083	0.0645322	0.0398352		1.05086	2367.91	33.0019	35.8857	34.0157	230.811	179.132	173.934	126.994	208.28	54.3361	227.574	10.5345
															1.5	1476.51	33.8	59.7773	6.96273	0	0	66.74		89.5674	10.4326	0	0	100	0.0195564	0.191936	0.0540568	0.171055	0.10443	0.0641066	0.0395582		0.98123	2360.91	32.9176	35.8769	33.3606	230.227	178.874	173.948	126.154	208.037	53.5137	227.059	10.2303
															1.5	1477.23	33.9	59.758	6.88205	0	0	66.64		89.6728	10.3272	0	0	100	0.0194396	0.191209	0.0536898	0.170051	0.103775	0.0636798	0.0392805		0.91574	2353.95	32.833	35.8679	32.7128	229.645	178.614	173.962	125.314	207.793	52.6972	226.544	9.93235
															1.5	1477.94	34	59.7386	6.80136	0	0	66.54		89.7785	10.2215	0	0	100	0.0193225	0.19048	0.0533217	0.169045	0.103118	0.0632516	0.0390019		0.854176	2347.03	32.7482	35.8588	32.0724	229.064	178.352	173.975	124.473	207.548	51.8866	226.031	9.64064
															1.5	1478.66	34.1	59.7193	6.72068	0	0	66.44		89.8846	10.1154	0	0	100	0.019205	0.189749	0.0529525	0.168035	0.102459	0.0628222	0.0387225		0.796329	2340.15	32.6632	35.8494	31.4392	228.484	178.089	173.987	123.631	207.302	51.0818	225.518	9.35508
															1.5	1479.37	34.2	59.7	6.64	0	0	66.34		89.991	10.009	0	0	100	0.0190872	0.189016	0.0525822	0.167023	0.101798	0.0623915	0.0384422		0.742001	2333.31	32.5779	35.8398	30.8133	227.906	177.824	173.998	122.788	207.055	50.283	225.005	9.07558
															1.5	1480.08	34.3	59.6807	6.55932	0	0	66.24		90.0976	9.90235	0	0	100	0.018969	0.18828	0.0522108	0.166007	0.101135	0.0619595	0.0381611		0.691002	2326.51	32.4924	35.8301	30.1946	227.33	177.558	174.009	121.944	206.807	49.49	224.493	8.80208
															1.5	1480.8	34.4	59.6614	6.47864	0	0	66.14		90.2047	9.79534	0	0	100	0.0188505	0.187542	0.0518382	0.164988	0.10047	0.0615262	0.0378791		0.643152	2319.74	32.4066	35.8201	29.5831	226.755	177.29	174.018	121.099	206.558	48.7029	223.982	8.53448
															1.5	1481.51	34.5	59.642	6.39795	0	0	66.04		90.312	9.688	0	0	100	0.0187316	0.186802	0.0514646	0.163966	0.0998032	0.0610915	0.0375963		0.598279	2313.02	32.3206	35.81	28.9788	226.181	177.02	174.027	120.253	206.308	47.9217	223.472	8.27271
															1.5	1482.23	34.6	59.6227	6.31727	0	0	65.94		90.4197	9.58033	0	0	100	0.0186123	0.18606	0.0510897	0.162941	0.0991342	0.0606556	0.0373126		0.556219	2306.34	32.2344	35.7996	28.3817	225.61	176.749	174.035	119.406	206.057	47.1464	222.963	8.01671
															1.5	1482.94	34.7	59.6034	6.23659	0	0	65.84		90.5277	9.47234	0	0	100	0.0184927	0.185315	0.0507138	0.161913	0.0984631	0.0602183	0.0370281		0.516815	2299.69	32.1479	35.7891	27.7917	225.04	176.476	174.042	118.558	205.804	46.377	222.454	7.76639
															1.5	1483.66	34.8	59.5841	6.15591	0	0	65.74		90.636	9.36402	0	0	100	0.0183727	0.184568	0.0503367	0.160882	0.09779	0.0597797	0.0367427		0.47992	2293.09	32.0612	35.7784	27.2089	224.471	176.201	174.048	117.709	205.551	45.6135	221.945	7.52167
															1.5	1484.37	34.9	59.5648	6.07523	0	0	65.64		90.7446	9.25537	0	0	100	0.0182523	0.183819	0.0499585	0.159847	0.0971148	0.0593398	0.0364564		0.445391	2286.52	31.9742	35.7675	26.6332	223.904	175.924	174.053	116.859	205.297	44.856	221.438	7.28249
															1.5	1485.08	35	59.5455	5.99455	0	0	65.54		90.8536	9.14639	0	0	100	0.0181316	0.183067	0.0495791	0.15881	0.0964376	0.0588985	0.0361693		0.413095	2279.99	31.8869	35.7564	26.0645	223.339	175.646	174.058	116.008	205.042	44.1044	220.931	7.04876
															1.5	1485.8	35.1	59.5261	5.91386	0	0	65.44		90.9629	9.03708	0	0	100	0.0180105	0.182314	0.0491985	0.157769	0.0957584	0.0584559	0.0358813		0.382904	2273.49	31.7994	35.7451	25.5029	222.775	175.365	174.062	115.155	204.786	43.3588	220.425	6.82042
															1.5	1486.51	35.2	59.5068	5.83318	0	0	65.34		91.0726	8.92743	0	0	100	0.0178891	0.181558	0.0488168	0.156725	0.095077	0.0580119	0.0355924		0.354695	2267.03	31.7117	35.7337	24.9483	222.213	175.083	174.065	114.302	204.529	42.619	219.92	6.59738
															1.5	1487.23	35.3	59.4875	5.7525	0	0	65.24		91.1826	8.81744	0	0	100	0.0177672	0.180799	0.0484339	0.155678	0.0943935	0.0575665	0.0353026		0.328355	2260.61	31.6236	35.722	24.4008	221.653	174.799	174.067	113.448	204.271	41.8853	219.416	6.37958
															1.5	1487.94	35.4	59.4682	5.67182	0	0	65.14		91.2929	8.70712	0	0	100	0.017645	0.180038	0.0480498	0.154628	0.093708	0.0571198	0.0350119		0.303773	2254.23	31.5353	35.7102	23.8602	221.094	174.513	174.068	112.592	204.012	41.1575	218.912	6.16695
															1.5	1488.66	35.5	59.4489	5.59114	0	0	65.04		91.4035	8.59646	0	0	100	0.0175224	0.179275	0.0476646	0.153574	0.0930203	0.0566717	0.0347203		0.280845	2247.88	31.4468	35.6982	23.3266	220.537	174.225	174.068	111.736	203.752	40.4357	218.41	5.95939
															1.5	1489.37	35.6	59.4295	5.51045	0	0	64.94		91.5145	8.48546	0	0	100	0.0173995	0.17851	0.0472781	0.152517	0.0923306	0.0562223	0.0344278		0.259473	2241.57	31.358	35.686	22.7999	219.982	173.935	174.068	110.878	203.491	39.7198	217.908	5.75686
															1.5	1490.08	35.7	59.4102	5.42977	0	0	64.84		91.6259	8.37411	0	0	100	0.0172761	0.177742	0.0468905	0.151457	0.0916387	0.0557714	0.0341345		0.239563	2235.29	31.2689	35.6736	22.2802	219.428	173.643	174.067	110.019	203.229	39.0099	217.407	5.55927
															1.5	1490.8	35.8	59.3909	5.34909	0	0	64.74		91.7376	8.26242	0	0	100	0.0171524	0.176972	0.0465017	0.150394	0.0909446	0.0553192	0.0338402		0.221027	2229.04	31.1795	35.6611	21.7673	218.876	173.349	174.065	109.159	202.966	38.306	216.906	5.36654
															1.5	1491.51	35.9	59.3716	5.26841	0	0	64.64		91.8496	8.15039	0	0	100	0.0170283	0.1762	0.0461117	0.149327	0.0902484	0.0548655	0.033545		0.20378	2222.84	31.0899	35.6484	21.2613	218.325	173.053	174.062	108.298	202.703	37.6082	216.407	5.17862
															1.5	1492.23	36	59.3523	5.18773	0	0	64.54		91.962	8.038	0	0	100	0.0169038	0.175425	0.0457204	0.148257	0.0895501	0.0544105	0.0332489		0.187744	2216.66	30.9999	35.6354	20.7621	217.777	172.755	174.058	107.436	202.438	36.9163	215.908	4.99542
															1.5	1492.94	36.1	59.333	5.10705	0	0	64.44		92.0747	7.92527	0	0	100	0.016779	0.174647	0.045328	0.147184	0.0888496	0.053954	0.0329519		0.172843	2210.52	30.9097	35.6223	20.2698	217.23	172.454	174.054	106.573	202.173	36.2304	215.411	4.81687
															1.5	1493.66	36.2	59.3136	5.02636	0	0	64.34		92.1878	7.81219	0	0	100	0.0166537	0.173868	0.0449343	0.146108	0.0881469	0.0534961	0.0326539		0.159005	2204.42	30.8193	35.6091	19.7843	216.684	172.152	174.049	105.708	201.906	35.5505	214.914	4.64292
															1.5	1494.37	36.3	59.2943	4.94568	0	0	64.24		92.3012	7.69876	0	0	100	0.0165281	0.173085	0.0445394	0.145028	0.087442	0.0530368	0.032355		0.146164	2198.34	30.7285	35.5956	19.3055	216.14	171.847	174.043	104.842	201.639	34.8767	214.418	4.47347
															1.5	1495.08	36.4	59.275	4.865	0	0	64.14		92.415	7.58497	0	0	100	0.016402	0.172301	0.0441433	0.143944	0.086735	0.0525761	0.0320552		0.134255	2192.3	30.6374	35.582	18.8334	215.598	171.54	174.036	103.975	201.37	34.2089	213.923	4.30847
															1.5	1495.8	36.5	59.2557	4.78432	0	0	64.04		92.5292	7.47083	0	0	100	0.0162756	0.171514	0.0437459	0.142858	0.0860257	0.0521139	0.0317545		0.12322	2186.3	30.5461	35.5682	18.3681	215.058	171.231	174.028	103.107	201.101	33.5472	213.429	4.14784
															1.5	1496.51	36.6	59.2364	4.70364	0	0	63.94		92.6437	7.35633	0	0	100	0.0161487	0.170724	0.0433473	0.141768	0.0853142	0.0516502	0.0314528		0.113	2180.32	30.4544	35.5542	17.9095	214.519	170.92	174.02	102.238	200.831	32.8915	212.935	3.99152
[truncated: 23 more columns]

## Sheet: Reference
Workman, R. K. & Hart, S. R. Major and trace element composition of the depleted MORB mantle (DMM). Earth Planet. Sci. Lett. 231, 53-72 (2005).
Falloon, T. J., Green, D. H., Danyushevsky, L. V., & McNeill, A. W. The composition of near‐solidus partial melts of fertile peridotite at 1 and 1.5 GPa: Implications for the petrogenesis of MORB. J. Petrol. 49, 591-613 (2008).
Salters, V. J. M., & Stracke, A. Composition of the depleted mantle. Geochem. Geophys. Geosyst. 5, Q05B07 (2004).
Walter, M. J. Melting of Garnet Peridotite and the Origin of Komatiite and Depleted Lithosphere. J. Petrol. 39, 29-60 (1998).
Lee, C.-T. A., Brandon, A. D. & Norman, M. Vanadium in peridotites as a proxy for paleo-fO2 during partial melting. Geochim. Cosmochim. Acta 67, 3045-3064 (2003).
Gaetani, G. A., & Grove, T. L. The influence of water on melting of mantle peridotite. Contrib. Mineral. Petrol. 131, 323-346 (1998).
