# Supplementary material for: Secular oxidation of Archean upper mantle caused by increasing crustal recycling
Source: Research Square preprint supplement (doi:10.21203/rs.3.rs-948127/v1), 2021-10-01
Supplement: Supplementary file 3 [file 93bcbf4b76cf4bc5ba29841e.xlsx]

## Sheet: S2
Supplementary Table 2. Estimation of the mantle oxygen fugacity of mantle-derived magmas.
Group B-1 samples								Group B-2 samples								Group B-2 samples
Sample No.	Ti (ppm)	V (ppm)	0.2 wt.% H2O	T (℃)	P (Gpa)	fO2		Sample No.	Ti (ppm)	V (ppm)	2.0 wt.% H2O	T (℃)	P (Gpa)	fO2		Sample No.	Ti (ppm)	V (ppm)	4.0 wt.% H2O	T (℃)	P (Gpa)	fO2
WP-22C	3461.06	143		1396.64	1.32499	-2.322		36647	3540.35	136		1424.2	1.62908	-2.871		GB32	3359.66	181		1356.58	1.96404	-1.404
ROQ-10	5169.19	209		1509.17	2.01937	-2.252		36617	3599.28	140		1424.53	1.61677	-2.784		36647	3540.35	136		1368.48	1.62698	-2.299
ROQ95-10	5169.1	209		1509.17	2.01943	-2.252		465402	2760.28	128		1373.99	1.22236	-2.745		36617	3599.28	140		1368.66	1.61583	-2.21
61	4260.85	214		1511.88	1.93305	-2.227		2000-19	3540.71	147		1431.86	1.68189	-2.744		2000-19	3540.71	147		1371.27	1.64163	-2.126
PH142	2884.03	187.738		1464.92	1.66424	-2.158		36831	3780	150		1440.7	1.80707	-2.719		465402	2760.28	128		1318.35	1.26728	-2.125
96TB0015	6043.79	230		1528.4	1.99406	-2.155		36800	3720	149		1416.01	1.63723	-2.513		36831	3780	150		1381.16	1.75105	-2.122
OB2	2633.5	186		1462.36	1.84945	-2.128		36770	3720.37	151		1418.79	1.69206	-2.506		36800	3720	149		1362.74	1.63664	-1.952
ME-7B	4980	202.26		1483.85	1.81515	-2.122		36739	3480	140		1389.81	1.3872	-2.466		36770	3720.37	151		1361.29	1.64964	-1.901
ROQ-7	4983.39	210		1491.24	1.77142	-2.089		36861	3599.64	147		1399.35	1.49461	-2.407		36739	3480	140		1337.95	1.41163	-1.895
372685	3018.87	190		1452.91	1.32077	-2.02		2000-13	3840	170		1440.5	1.75948	-2.378		36861	3599.64	147		1346.73	1.50716	-1.84
DD16	6064.45	195		1584.95	3.42202	-2.003		SG-060	2319.13	143		1340.27	1.49718	-2.205		2000-13	3840	170		1385.9	1.74918	-1.828
T-7	3120.31	223		1514.77	2.0905	-1.976		SG-110	2318.82	136		1321.98	1.4469	-2.168		SG-060	2319.13	143		1293.81	1.51741	-1.668
ROQ-11	5323.98	222		1493.99	1.96635	-1.957		465425	3840.38	179		1424.42	1.57066	-2.081		BCB-13	3497.82	182.36		1375.82	1.97128	-1.577
ROQ95-11	5323.95	222		1493.99	1.96636	-1.957		JEH-2007-20	4675.26	154		1398.24	1.34729	-2.069		465425	3840.38	179		1367.8	1.57338	-1.488
372688	3738.89	228		1506.11	1.73077	-1.945		BCB-13	3497.82	182.36		1421.43	1.99176	-2.053		JEH-2007-20	4675.26	154		1344.09	1.35411	-1.482
372679	3410.53	205		1460.91	1.41697	-1.866		879335	4534.46	155		1396.02	1.32075	-2.051		PHAG044	3688.15	198.453		1391.17	1.96334	-1.464
465605A	4200	241		1641.68	3.62863	-1.86		PHAG048	3141.68	171.008		1390.69	1.44313	-1.982		879335	4534.46	155		1340.79	1.34425	-1.449
SUDD003-250.1	3737.89	231.89		1501.61	1.85288	-1.848		SH-44	3153.34	165		1374.88	1.35179	-1.921		PHAG048	3141.68	171.008		1333.49	1.45551	-1.344
SL95-27	3660.37	188		1427.21	2.04107	-1.831		CD339W3-6	2551.07	162		1356.66	0.872367	-1.885		SH-44	3153.34	165		1323.01	1.35454	-1.328
WM-4	4112.95	197		1440.19	1.82392	-1.814		OB1	2548.43	178		1381.29	1.59693	-1.801		36678	4680.47	210		1397.54	1.87759	-1.279
6411	3797.23	233		1497.99	1.81838	-1.806		36678	4680.47	210		1447.71	1.92316	-1.781		SG-056	2497.8	149		1277.15	1.38001	-1.244
465412	4500	227		1609.24	3.45445	-1.805		SG-056	2497.8	149		1320.73	1.34164	-1.779		510631	3682.15	164		1321.85	1.64468	-1.233
SC96-8	5218.96	234		1616.06	3.59353	-1.787		MRD001-2	3157.23	196		1411.23	1.39772	-1.752		CD339W3-6	2551.07	162		1300.11	0.93681	-1.225
SSD669-256.15	3155.63	211.03		1462.52	2.19745	-1.741		96TB0023	5210.92	210		1447.73	1.60586	-1.745		OB1	2548.43	178		1325.47	1.59479	-1.177
213763	4142.13	237		1492.23	1.83187	-1.735		510631	3682.15	164		1364.5	1.62628	-1.725		96TB0023	5210.92	210		1388.08	1.57781	-1.145
SUDD003-288.3	3505.38	232.95		1494.17	2.07575	-1.727		510663	2662.26	173		1356.93	1.31712	-1.638		MRD001-2	3157.23	196		1350.79	1.40642	-1.096
MN006	4439.49	232.67		1480.82	2.10571	-1.706		SUDD003-260.7	3445.93	218.98		1432.64	1.49841	-1.582		GB31	3599.64	157		1297.25	1.44441	-1.069
H3	6385.28	233		1600.29	3.82206	-1.69		52-IL-98-12	4037.94	184.893		1386.66	1.6907	-1.575		52-IL-98-12	4037.94	184.893		1339.99	1.66118	-1.055
WP-34	5234.73	178		1519.49	2.20562	-1.69		SIG-240	3783.18	216		1427.09	1.84445	-1.562		SIG-240	3783.18	216		1378.26	1.81158	-1.052
B5	3383.75	226		1478.97	1.58807	-1.68		SP06-004-39	3406.54	209		1414.14	1.82154	-1.556		510663	2662.26	173		1305.65	1.35839	-1.037
WP-94-27	3794.74	210		1444.97	1.8749	-1.662		GB31	3599.64	157		1337.46	1.4235	-1.553		SP06-004-39	3406.54	209		1360.34	1.80084	-0.977
WP-35A	5461.88	179		1516.67	2.40666	-1.651		MN239	4152.46	226.02		1441.6	1.76847	-1.545		SE10-3	3193.82	179		1314.86	1.19185	-0.969
SUDD003-270.2	3739.49	238.94		1486.81	1.21549	-1.61		SE10-3	3193.82	179		1362.72	1.14239	-1.528		MN239	4152.46	226.02		1384.61	1.74245	-0.961
N38	4859.93	227		1582.56	3.55365	-1.607		ME-7C	4920	204.497		1415.75	1.66522	-1.518		SUDD003-260.7	3445.93	218.98		1373.21	1.50466	-0.959
1786-12A	3944.57	236		1477.42	1.9174	-1.595		178344	3197.49	180		1360.21	1.22173	-1.483		81572	3437.34	215.557		1367.54	1.68956	-0.951
465601	6000	262		1628.29	3.51039	-1.593		81572	3437.34	215.557		1416.18	1.71777	-1.471		BCB-05	3221.23	200		1341.66	1.81819	-0.918
JP02-266	3733.61	220.454		1453.31	1.38236	-1.58		SUDD003-220.1	3504.26	219.39		1421.31	1.46184	-1.463		R-283	4263.41	252		1411.37	1.79314	-0.901
TIPASJVI2	3676.05	231		1466.06	1.87598	-1.53		510878	2939.64	197		1384.89	1.48374	-1.458		SUDD003-220.1	3504.26	219.39		1368.36	1.47686	-0.899
RL95-50	4080.41	268		1515.97	1.61506	-1.512		BCB-05	3221.23	200		1387.98	1.85141	-1.437		510878	2939.64	197		1334.11	1.49851	-0.885
RKY-17	3882.32	232		1462.59	1.56699	-1.51		R-283	4263.41	252		1463.05	1.83684	-1.41		178344	3197.49	180		1308.81	1.28512	-0.877
13LB31-5	3316.53	187.72		1504.18	2.5218	-1.487		510990	2831.97	195		1375.77	1.16301	-1.393		ME-7C	4920	204.497		1355.02	1.62069	-0.872
N32	7130.74	247		1590.64	3.77093	-1.479		12LN72-3	3547.15	212.267		1402.99	1.94501	-1.385		12LN72-3	3547.15	212.267		1352.42	1.89855	-0.83
N40	5098.44	219		1548.61	2.86027	-1.434		220417	4107.95	170		1349.24	1.52672	-1.378		17BW11-3	3589.94	171		1297.11	1.62189	-0.829
DH95-2	6598.68	255		1591.4	2.6061	-1.414		510662	2842.43	196		1375.77	1.49266	-1.374		SC95-53	3600.36	252		1406.72	1.99893	-0.809
YVB4	5281.08	276		1627.63	4.27459	-1.407		SE10-5	3842.18	196		1380.06	1.3068	-1.362		220417	4107.95	170		1300.38	1.53216	-0.798
HB96-2	4441.33	192		1392.21	1.21274	-1.392		17BW11-3	3589.94	171		1335.31	1.6055	-1.292		SG-128	3974.02	198		1333.68	1.77657	-0.796
508949	4735.74	221		1430.79	2.05608	-1.387		VB288	5247.09	229		1423.58	1.69222	-1.284		SE10-5	3842.18	196		1329.05	1.31432	-0.782
TW1	4301.52	237		1453.14	1.71371	-1.385		SG-128	3974.02	198		1376	1.76816	-1.274		511116	3604.89	198		1328.48	1.86676	-0.771
SUDD003-199.8	3684.51	232.54		1451.55	0.803586	-1.375		114	4306.61	204		1386.55	1.93742	-1.272		510662	2842.43	196		1323.12	1.51785	-0.769
SUDD003-294.0	4094.55	251.58		1473.32	2.07641	-1.359		SG-104	3263.58	214		1394.81	1.90763	-1.271		510990	2831.97	195		1320.36	1.21769	-0.755
510687	3826.77	225		1436.34	1.78008	-1.355		SL95-4	3540	204		1380.01	1.60204	-1.27		GB29	3180	143		1245.85	1.25852	-0.751
SH-39	4873.1	249		1462.61	2.00968	-1.35		15JD48-7	3288	153.36		1302.08	0.907606	-1.26		SL95-4	3540	204		1333.33	1.59571	-0.739
N31	6859.77	229		1548.34	2.67431	-1.337		221722	3700.32	188		1357.98	1.19718	-1.259		289141	3754.07	214		1346.85	1.93345	-0.731
N33	4280.32	232		1554.7	3.04469	-1.305		RKY-12	4204.63	242		1433.61	1.98777	-1.255		114	4306.61	204		1337.48	1.8888	-0.724
N22	6759.12	244		1563.17	3.47117	-1.293		511116	3604.89	198		1369.22	1.8691	-1.241		SG-104	3263.58	214		1345.74	1.86645	-0.724
LSJ95-11	5219.48	223		1535.38	2.76592	-1.28		209117	3833.08	168		1329.48	1.00078	-1.225		15JD48-7	3288	153.36		1259.87	0.975834	-0.714
20	3586.99	224		1544.31	3.15345	-1.28		PH119	3378.03	227.34		1409.72	1.75969	-1.211		PIC-41	4116.39	231		1367.77	1.83695	-0.711
510939	3558.28	201		1504.81	2.21017	-1.279		CD339 W3-9	3819.3	203		1375.5	1.40736	-1.21		17BW27-1	2505.46	202		1334.44	1.82694	-0.697
WP-94-5	4147.69	239		1444.93	1.84427	-1.268		PIC-41	4116.39	231		1414.52	1.84319	-1.209		PH119	3378.03	227.34		1361.9	1.75266	-0.691
BN310-8	2988.48	202		1398.63	1.24925	-1.259		289141	3754.07	214		1389.45	1.94449	-1.205		RKY-12	4204.63	242		1379.08	1.92524	-0.688
N30	6766.22	257		1569.25	3.13924	-1.216		209118	3724.51	195		1362.96	1.1989	-1.202		VB288	5247.09	229		1366.04	1.65139	-0.681
B6	3322.52	203		1391.83	1.18118	-1.21		GB29	3180	143		1278.4	1.21979	-1.186		221722	3700.32	188		1309.07	1.24224	-0.681
SH-32	6253.87	266		1577.86	3.2857	-1.18		339196	2761.68	165		1305.29	0.876499	-1.183		12LN20-1	3377.75	209.181		1333.81	1.71495	-0.667
N27	6482.81	242		1544.74	2.58501	-1.173		12LN20-1	3377.75	209.181		1379.1	1.7277	-1.183		6LB08-7	4260	252		1387.6	1.85752	-0.65
C9	4083.27	259		1461.2	1.69209	-1.143		331/628	3549.94	193		1355.5	1.28819	-1.172		209117	3833.08	168		1283.02	1.05748	-0.649
N44	3910.68	218		1515.05	2.44042	-1.138		AW024	4537.92	216.928		1393.8	1.78373	-1.16		CD339 W3-9	3819.3	203		1324.7	1.40966	-0.628
510714	5052.5	247		1437.1	1.87532	-1.133		6LB08-7	4260	252		1436.78	1.90134	-1.157		331/628	3549.94	193		1309.38	1.32008	-0.623
84GRS-1166	3720	233		1424.92	1.653	-1.109		17BW27-1	2505.46	202		1374.14	1.82777	-1.145		AW024	4537.92	216.928		1344.36	1.74592	-0.615
KAL-13	3381.49	240		1555.49	2.88659	-1.095		96TB0006	3890.81	210		1379.38	1.59459	-1.145		339196	2761.68	165		1260.5	0.9431	-0.605
94141	5079.41	249		1434.57	1.41386	-1.087		485462	3300.66	229		1405.25	1.69411	-1.129		485462	3300.66	229		1355.96	1.67468	-0.587
DH95-3	3840.77	266		1471.08	1.93441	-1.083		JW-19	3519.24	185		1338.22	1.38354	-1.106		209118	3724.51	195		1310.29	1.24524	-0.584
TW3	3832.51	224		1407.41	1.07943	-1.08		SUDD003-287.7	3570.13	218.52		1385.74	1.80713	-1.104		81781	5487.36	271.894		1398.33	1.84758	-0.559
74-PTP-03	2986.26	232		1440.78	1.39753	-1.074		81781	5487.36	271.894		1451.08	1.89859	-1.086		JW-19	3519.24	185		1293.25	1.3918	-0.555
MU95-8	3600	259		1581.86	2.5416	-1.07		510840	3265.22	211		1370.84	1.24683	-1.061		96TB0006	3890.81	210		1326.94	1.57447	-0.546
RKY-18	4307.82	252		1439.12	1.63128	-1.053		SG-130	3974.41	215		1378.42	1.79163	-1.056		485420	3060	199		1308.22	1.11678	-0.534
MP-68	3240	248		1458.63	1.91249	-1.051		SIG-44	5276.38	168		1331.66	0.959241	-1.046		SUDD003-287.7	3570.13	218.52		1334.88	1.79642	-0.527
N43	6152.76	273		1570.4	3.23968	-1.05		485420	3060	199		1350.76	1.04139	-1.044		510840	3265.22	211		1323.69	1.28815	-0.513
KX2	4740	270		1457.36	1.88829	-1.043		362684	3732.42	211		1369.95	1.46027	-1.037		362684	3732.42	211		1324.43	1.47559	-0.511
465619A2	5759.42	273		1567.73	2.78837	-1.025		83533	5824.05	289.746		1463.42	1.96059	-1.033		CD339 W3-10	3970.68	206		1318.04	1.41759	-0.49
NMXD41-1	3025	215		1399.3	1.34745	-1.023		CD339 W3-10	3970.68	206		1364.56	1.41208	-1.032		83533	5824.05	289.746		1406.87	1.89691	-0.48
MP-8A	3720.37	260		1457.36	1.72144	-1.011		96KYT07	4197	222		1384.08	1.41927	-1.007		10LF46	4140	196		1305.16	1.54401	-0.463
H-71	5274.46	286		1465.82	1.70089	-0.986		ME-7E	5100	199.195		1362.28	1.14938	-1		JEH-2007-01	4920.1	195		1309.81	1.19688	-0.458
C126	3664.76	237		1418.73	1.60895	-0.977		JEH-2007-01	4920.1	195		1355.58	1.17111	-0.994		52-IL-98-36	3829.06	210.058		1317.89	1.4229	-0.439
372682	3516.12	241		1539.78	2.55408	-0.973		JW-7	4342.43	165		1312.35	1.44172	-0.988		ME-7E	5100	199.195		1313.44	1.19352	-0.435
SUDD003-288.7	3514.11	197.23		1359.23	1.31091	-0.965		KYT188	4575.1	244		1408.14	1.75597	-0.969		KYT188	4575.1	244		1358.47	1.73397	-0.433
SSD669-256.35	3215.1	205.16		1477.58	2.42724	-0.944		MS73	5824.65	277.513		1442.78	1.71786	-0.957		MS73	5824.65	277.513		1387.99	1.68329	-0.404
s_H-71	5274.24	286		1461.24	1.6596	-0.943		10LF46	4140	196		1346.15	1.52596	-0.952		96KYT07	4197	222		1330.59	1.41165	-0.402
87-18A	3718.51	252		1437.4	1.77043	-0.942		MMD12-132	3542.21	225.303		1380.15	1.3624	-0.937		96KYT13	4946.9	254		1364.04	1.7703	-0.376
H-70	5294.12	289		1463.47	1.6399	-0.935		ML88-11	4140	241		1401.09	1.70956	-0.936		UB1	2977.67	184.62		1274.26	1.19827	-0.37
ME-23B	7200.72	280.473		1443.18	1.58305	-0.917		52-IL-98-36	3829.06	210.058		1359.32	1.38	-0.926		18LBB03-5b	4979.18	238		1345.89	1.90067	-0.357
DU-2B	3719.63	261		1448.81	1.76471	-0.913		22180	3155.98	177		1307.25	0.852197	-0.917		22180	3155.98	177		1263.82	0.944869	-0.353
S63	4094.52	255		1430.34	1.53323	-0.9		UB1	2977.67	184.62		1316.09	1.15064	-0.903		ML88-11	4140	241		1347.37	1.6708	-0.344
KAF87-18A	3719.63	252		1433.06	1.72136	-0.899		96KYT13	4946.9	254		1413.27	1.80612	-0.9		MMD12-132	3542.21	225.303		1327.74	1.37701	-0.334
330-14	6357.78	268		1542.99	2.90577	-0.893		DH96-10	4919.02	252		1409.81	1.42075	-0.888		KD330-1	3840.91	210		1309.17	1.12654	-0.331
s_H-70	5294.03	289		1458.87	1.5988	-0.891		KD330-1	3840.91	210		1355.68	1.09813	-0.883		23214	3684.33	227		1329.29	1.45391	-0.329
43832	3710.72	226		1392.36	0.927013	-0.882		PBA92-2008G	3154.2	180		1308.33	0.975761	-0.876		331/477	3771.33	200		1295.63	1.11801	-0.317
TVK-138	7800.78	338		1606.92	3.40587	-0.814		23214	3684.33	227		1376.52	1.4342	-0.872		SH-30	2443	185		1269.63	1.07644	-0.308
BA-21	4560	286.59		1455.51	1.93965	-0.804		18LBB03-5b	4979.18	238		1392.54	1.90684	-0.869		SE10-6	3668.39	189		1280.56	0.943801	-0.306
s_H-68	5974.32	316		1594.18	3.63556	-0.797		SH-30	2443	185		1312.96	1.03999	-0.858		JEH-2007-23	4521.98	188		1286.97	1.03786	-0.301
TVK-156	5940	291		1558.59	2.90371	-0.78		JEH-2007-23	4521.98	188		1332.18	0.996963	-0.853		278812	3723.55	194		1284.88	1.06395	-0.278
SH-43	4019.38	250		1521.57	2.65029	-0.774		MTS4B	4283.97	216.363		1362.79	1.35681	-0.844		NMXD36-2	3074.09	217		1314.59	1.42897	-0.277
SSD669-256.55	3393.31	217.15		1476.23	2.40881	-0.751		NMXD36-2	3074.09	217		1361.75	1.42952	-0.837		485468	3600.36	234		1333.4	1.65709	-0.267
519695	5843.95	266.2		1414.82	1.2874	-0.732		SE10-6	3668.39	189		1321.17	0.866007	-0.815		s_H-32	4355.01	260		1361.43	1.67783	-0.263
N26	6388.61	288		1545.3	2.92407	-0.723		87RPS-0046	2640	191		1318.97	0.987531	-0.81		DH96-10	4919.02	252		1351.85	1.41071	-0.262
468794	2803.74	186		1321.91	0.818414	-0.719		106	6029.05	282		1431.25	1.68746	-0.807		106	6029.05	282		1378.1	1.69307	-0.26
PK95-4	3240	249		1420.94	1.48154	-0.664		331/477	3771.33	200		1335.37	1.05235	-0.804		331/626	3773.21	208		1300.67	1.18311	-0.259
H-67	6277.94	308		1445.37	1.59268	-0.652		MTS9	4224.91	197.341		1335.65	0.864347	-0.794		87RPS-0046	2640	191		1274.26	1.0435	-0.242
HE-14	6489.44	269		1512.92	2.49426	-0.651		KD330-4	3675.72	209		1344.73	1.25654	-0.785		KD330-4	3675.72	209		1299.69	1.27092	-0.239
H-63	7853.88	335		1458.43	1.60269	-0.651		RKY-22	3810.1	227		1368.19	1.27444	-0.778		MS74	6209.65	298.182		1389.62	1.84227	-0.236
N25	6742.72	302		1546.15	2.74787	-0.627		PH106	3433.05	214.533		1350.88	1.39222	-0.778		12JD29-1	4316.81	264		1363.14	1.95044	-0.23
GIR-149	6720	296		1538.22	2.48434	-0.627		MS74	6209.65	298.182		1442.88	1.89544	-0.773		PH106	3433.05	214.533		1305.28	1.40185	-0.229
T10	3394.86	226		1372.93	1.02234	-0.625		278812	3723.55	194		1323.99	0.999076	-0.765		362652	4281.46	218		1311.94	1.46862	-0.228
H-58	7617.71	361		1608.71	3.76351	-0.613		331/626	3773.21	208		1342.12	1.12989	-0.762		MTS9	4224.91	197.341		1288.4	0.943671	-0.216
s_H-67	6277.9	308		1440.72	1.55351	-0.61		81778	3884.87	220.883		1358.13	1.02372	-0.75		13LB07-2	2460.43	183.234		1258.6	0.915487	-0.205
s_H-63	7854.1	335		1453.85	1.56272	-0.61		485468	3600.36	234		1374.78	1.6404	-0.744		496122	3000	216		1308.12	1.59015	-0.202
H-60	7500	337		1458.04	1.65887	-0.61		13LB07-2	2460.43	183.234		1299.88	0.829715	-0.742		81778	3884.87	220.883		1311.15	1.07984	-0.194
s_H-58	7617.62	361		1604.08	3.68916	-0.58		362652	4281.46	218		1355.23	1.47652	-0.737		RKY-22	3810.1	227		1317.61	1.29388	-0.186
HE-16	6373.94	269		1504.1	2.46687	-0.572		s_H-32	4355.01	260		1405.03	1.6672	-0.736		11XT116-7	6300.63	235		1329.67	1.66723	-0.185
s_H-60	7500.21	337		1453.44	1.61809	-0.569		12JD29-1	4316.81	264		1409.6	1.99999	-0.731		HEG-18	4373.88	279		1375.79	1.83865	-0.185
HS540	7726.38	382		1623.9	3.89433	-0.553		72 MAFIC	3089.28	210		1339.11	0.803758	-0.706		HEG-15	4380	279		1375.24	1.8318	-0.181
s_H-59	6840.72	350		1589.43	3.35038	-0.527		HEG-18	4373.88	279		1424.7	1.88034	-0.703		RKY-1	4350.89	244		1329.05	1.3505	-0.092
S57	4113.73	270		1413.68	1.31143	-0.527		HEG-15	4380	279		1424.07	1.87244	-0.697		MTS4A	4136.25	214.916		1294.57	1.17813	-0.06
Z2967-66	4920	289		1533.31	3.37191	-0.501		11XT116-7	6300.63	235		1374.42	1.68807	-0.687		TVK-137	4440	258		1339.74	1.53703	-0.044
15YK31-1	3648.37	213		1337.03	1.18238	-0.462		496122	3000	216		1347.48	1.56429	-0.679		224940	6112.16	281.517		1356.75	1.67767	-0.033
BA-14	5339.47	353.9		1481.02	2.17441	-0.424		RKY-1	4350.89	244		1377.69	1.33954	-0.647		H-69	5942.4	278		1353.85	1.58346	-0.031
s_H-62	7391	357		1577.24	3.34818	-0.412		MTS4A	4136.25	214.916		1339.41	1.14527	-0.605		MMD22-7-74	4744.1	227.374		1306.91	1.39622	-0.025
99-4-32A	4827.73	278		1506.72	2.74149	-0.405		RG-21	5700	320		1444.92	1.90237	-0.566		ME-23A	7200	277.467		1347.69	1.56755	0.006
DUN-05	3060.31	254		1522.79	2.23055	-0.394		H-69	5942.4	278		1402.75	1.59877	-0.556		s_H-69	5942.63	278		1349.55	1.55179	0.017
DUN-01	4380.44	288		1417.43	1.54484	-0.378		TVK-137	4440	258		1383.54	1.51323	-0.536		RG-21	5700	320		1386.55	1.84921	0.027
DU-2	3960.4	266		1498.85	2.20487	-0.362		ME-23A	7200	277.467		1396.06	1.58152	-0.515		C76	4270.68	225		1296.99	1.47654	0.052
Z2967-49	3540.35	253		1491.94	2.82319	-0.358		s_H-69	5942.63	278		1398.27	1.56334	-0.51		WT2124-1	2847.9	166		1215.18	0.849535	0.075
LU96-4	4560	345		1483.91	2.11211	-0.33		224940	6112.16	281.517		1399.32	1.6728	-0.491		SC95-54	3981.46	294		1373.6	1.74539	0.109
MU95-27	3780	289		1428.83	1.89083	-0.294		C76	4270.68	225		1340.72	1.44361	-0.478		CD339 W3-11	4296.83	232		1299.74	1.41625	0.111
PL95-8	5400.54	343		1546.04	2.86957	-0.124		WT2124-1	2847.9	166		1250.67	0.764755	-0.433		RIH-20	3588.44	229		1293.38	1.06886	0.151
SC95-13	5101.02	311		1380.36	1.3664	0.153		CD339 W3-11	4296.83	232		1342.48	1.3896	-0.406		WD103-193.4	3651.8	247.73		1315.06	1.47792	0.165
PL95-23	3660.37	318		1442.19	1.67152	0.199		RIH-20	3588.44	229		1337.42	1.03156	-0.394		VB296	2354.62	194		1249.09	0.959305	0.236
HEG-14	3480	310		1553.93	3.05652	0.231		MTS11	4254.88	214.343		1321.09	1.08314	-0.388		H-31	3952.57	270		1331.26	1.49842	0.256
L6-10B	3620.47	309		1438.29	1.93194	0.094		SC95-54	3981.46	294		1419.38	1.73881	-0.385		165390	5990.12	295		1341.52	1.58418	0.267
								WD103-193.4	3651.8	247.73		1359.13	1.48194	-0.361		MMD12-179	4416.94	266.315		1321.16	1.49792	0.281
								VB296	2354.62	194		1293.63	0.890327	-0.353		s_H-31	3952.73	270		1326.95	1.46815	0.308
								H-31	3952.57	270		1378.1	1.50092	-0.282		SC95-7	3601.08	262		1318.61	1.38783	0.357
								MMD12-179	4416.94	266.315		1367.47	1.50499	-0.257		22179	3865.21	220		1265.54	1.01625	0.382
								s_H-31	3952.73	270		1373.57	1.46715	-0.232		C125	3790.61	269		1321.51	1.63215	0.391
								SC95-7	3601.08	262		1365.81	1.35988	-0.205		MMD5-127	4087.86	282.458		1332.01	1.46878	0.399
								165390	5990.12	295		1383.89	1.56705	-0.2		MMD12-182	4432.3	296.442		1341.56	1.55285	0.409
								MMD5-127	4087.86	282.458		1381.42	1.48432	-0.167		MMD12-204B	4606.16	301.728		1343.49	1.60756	0.427
								22179	3865.21	220		1305.84	0.957536	-0.141		83540	5609.19	313.039		1315.68	1.16697	0.745
								220213	5263.69	297.586		1383.59	1.27635	-0.139		MMD5-108B	4551.98	333.06		1349	1.61943	0.749
								C125	3790.61	269		1366.06	1.64631	-0.136		MS54	4895.18	311.687		1315.15	1.11969	0.818
								s_H-10	5037.79	314		1399.93	1.52625	-0.117		HB12	6085.96	301.86		1290.2	1.30432	0.926
								MMD12-182	4432.3	296.442		1384.81	1.54604	-0.078		HB14	5938.17	323.793		1304.46	1.32121	0.952
								MMD12-204B	4606.16	301.728		1386.52	1.60138	-0.055		83210	2614.88	225.147		1232.3	0.705301	1.222
								83545	3238.62	238.781		1318.73	1.02055	0.043
								83544	4645.95	263.671		1324.9	1.22392	0.191
								83540	5609.19	313.039		1361.62	1.13409	0.219
								MMD5-108B	4551.98	333.06		1394.28	1.64405	0.246
								MS54	4895.18	311.687		1362.76	1.08138	0.265
								83534	5595.54	318.648		1361.32	1.23339	0.279
								HB14	5938.17	323.793		1350.39	1.31524	0.419
								MS48	5445.54	337.952		1365.37	1.12538	0.423
								HB12	6085.96	301.86		1331.89	1.26708	0.426
								83210	2614.88	225.147		1272.14	0.58927	0.669
